# Supplementary material for: Diastereoselective synthesis and profiling of bicyclic imidazolidinone derivatives bearing a difluoromethylated catechol unit as potent phosphodiesterase 4 inhibitors
Source: Royal Society of Chemistry journal article supplement (doi:10.1039/c8ob01039k), 2018-01-01
Supplement: c8ob01039k1.pdf [file c8ob01039k1.pdf]

## Supporting information

### **Diastereoselective Synthesis and Profiling of Bicyclic Imidazolidinone Derivatives Bearing a Difluoromethylated Catechol Unit as Potent Phosphodiesterase 4 Inhibitors**

Valentin S. Dorokhov,<sup>a,b</sup> Ivan S. Golovanov,<sup>a</sup> Vladimir A. Tartakovskiy,<sup>a</sup>

Alexey Yu. Sukhorukov,<sup>a,\*</sup> Sema L. Ioffe<sup>a</sup>

<sup>a</sup> N. D. Zelinsky Institute of Organic Chemistry, 119991, Leninsky prospect, 47, Moscow, Russian Federation. E-mail: [sukhorukov@ioc.ac.ru](mailto:sukhorukov@ioc.ac.ru)

<sup>b</sup> Higher Chemical College of the Russian Academy of Sciences, D. Mendeleev University of Chemical Technology of Russia, 125047, Miusskaya sq., 9, Moscow, Russian Federation

\* [sukhorukov@ioc.ac.ru](mailto:sukhorukov@ioc.ac.ru)

|                                                        |     |
|--------------------------------------------------------|-----|
| 1. Methods                                             | S2  |
| 2. Synthetic procedures and characterization data      | S6  |
| 3. Biological studies: primary data                    | S44 |
| 4. Quantum-chemical calculations                       | S67 |
| 5. Molecular docking                                   | S82 |
| 6. Copies of NMR, FT-IR spectra and HPLC chromatograms | S88 |

# 1. Methods

## Synthesis of target compounds

All reactions were performed in oven-dried (150°C) glassware. Catalytic hydrogenations were carried out in a steel autoclave with external stirring and heating. Column chromatography was performed using Kieselgel 40-60µm 60A silica gel. 1D and 2D NMR spectra were recorded at room temperature in CDCl<sub>3</sub>. The chemical shifts (<sup>1</sup>H, <sup>13</sup>C) are given ppm (δ) in relative to the solvent signal. Multiplicities are indicated by s (singlet), d (doublet), t (triplet), q (quartet), m (multiplet), br (broad). Peaks in IR-spectra data are reported in cm<sup>-1</sup> with the following relative intensities: s (strong), m (medium), w (weak), br (broad), sh (shoulder). Concentrations *c* in optical rotation angles are given in g/100 mL. [α]<sub>D</sub> values are given in 10<sup>-1</sup> deg cm<sup>2</sup> g<sup>-1</sup>. Analytical thin-layer chromatography was performed on silica gel plates with QF-254. Visualization was accomplished with UV light or the solution of anisaldehyde/H<sub>2</sub>SO<sub>4</sub> in ethanol. Elemental analysis was performed by the Analytical Laboratory of the Institute of Organic Chemistry. HRMS were measured on electrospray ionization (ESI) instrument with a time-of-flight (TOF) detector. GC-MS was performed on a Chromatec 5000 with Agilent DB-1MS column 122-0132. EI mass spectra were recorded on a Finnigan MAT Inco 50 spectrometer (70 eV). Chiral HPLC analysis was performed on a Shimadzu LC-20 Prominence with a UV-VIS photodiode array detector.

Glacial acetic acid was recrystallized two times. CH<sub>2</sub>Cl<sub>2</sub> (technical grade), MeCN (technical grade), DMF, Et<sub>3</sub>N, and Me<sub>3</sub>SiBr were redistilled from CaH<sub>2</sub>, acetone was distilled from Na<sub>2</sub>SO<sub>4</sub>. Hexane, methyl tert-butyl ether (MTBE), EtOAc and methanol were technical grade and distilled without drying agents. (-)-(1*R*,2*S*)-2-phenylcyclohexanol (99% ee), ethyl vinyl ether, SnCl<sub>4</sub>, NaN<sub>3</sub>, NaI, NaBH<sub>3</sub>CN, NH<sub>4</sub>OAc, nitroethane, isovanillin, (bromomethyl)cyclopropane, DBU, DIBAL-H, methanesulfonyl chloride, DMSO, triphosgene, Lawesson's reagent, methyl iodide, NaH (in mineral oil), Raney nickel (50% slurry in water), Zn(OTf)<sub>2</sub>, Cr(NO<sub>3</sub>)<sub>3</sub>•9H<sub>2</sub>O, TMSCF<sub>2</sub>Br, BrF<sub>2</sub>CCO<sub>2</sub>Et were purchased from commercial sources and used as received.

## Docking

Docking was performed using AutoDock Vina software (X-Score function)<sup>1</sup> with using standard parameters with the degree of exhaustiveness set to 16. For the docking of predesigned structures (Figures 3, 4 in the manuscript and on pp. 82-84 in Supporting information) PDE4B structure 1XMU<sup>2</sup> (catalytic domain of human phosphodiesterase 4B in complex with Roflumilast) was used. Protein structure was prepared according to classical AutoDock scenario: ligand and water molecules were removed, atoms of Zn<sup>2+</sup> and Mg<sup>2+</sup> were remained in the protein structure, polar hydrogens, Gasteiger-Huckel charges and studied ligands were added to protein (*pdbqt* input files of ligands to be prepared using AutoDock Tools 1.5.6). The obtained protein model was verified by successful redocking of Roflumilast.

3D structures of ligands were generated using ChemBio3D Ultra 13.0 (MM2 force field for geometry optimization). Gasteiger charges and all the active torsions were added to the structures of ligands using AutoDock Tools 1.5.6 software.

AutoGrid implemented in AutoDock Tools 1.5.6 was used for defining the active site. The dimensions of the grid were set to 40 Å × 40 Å × 40 Å points with grid spacing 0.375 Å. The grid was centered on the co-crystallised ligand present in the complex. These dimensions and position of the grid box were defined

---

<sup>1</sup> O. Trott and A. J. Olson, *J. Comput. Chem.*, 2010, **31**, 455.

<sup>2</sup> G. L. Card, B. P. England, Y. Suzuki, D. Fong, B. Powell, B. Lee, C. Luu, M. Tabrizizad, S. Gillette, P. N. Ibrahim, D. R. Artis, G. Bollag, M. V. Milburn, S.-H. Kim, J. Schlessinger and K. Y. J. Zhang, *Structure* **2004**, *12*, 2233-2247.

so as to include the entire binding site of the enzyme and provide space for the translational and rotational of the ligand.

Top scored poses according to predicted free energy of binding were selected for further comparison and analysis of protein-ligand interactions. Docking results were compared by the total score values.

Visualization of interactions of molecules with PDE4 was done using Pymol v. 2.1.1.

### DFT calculations

Quantum-chemical calculations were performed with the Gaussian 16 Rev A.03 program<sup>3</sup>. For calculations of thermodynamics DFT MN15L/Def2TZVP level of theory was used. In the development of the theoretical models of all compounds geometrical parameters from various experimental X-Rays taken from The Cambridge Structural Database (CCDC) and Protein Data Bank (RCSB) were used as starting points. All calculations were performed in water (SMD model), the approach of Martin and co-workers was followed<sup>4</sup>. Cartesian coordinates are given in angstroms, absolute energies for all substances are given in hartrees. Analysis of vibrational frequencies was performed for all optimized structures. All compounds were characterized by only real vibrational frequencies. Wavefunction stability, using *stable* keyword, was also checked for all calculations.

Geometry optimization of all generated structures was performed using following keywords<sup>5</sup>:

```
# opt freq MN15L/Def2TZVP/fit scrf=(smd,solvent=water) guess=Always pressure=1357 nosymm SCF=YQC
```

### Biology

#### 1. In vitro enzymatic assay for recombinant human PDE4B1

*Materials:* Apremilast is purchased from Cayman Chemicals (Ann Arbor, MI, Item Number 18502), PDE Assay Buffer (BPS Catalog number 60393), PDE Binding Agent (BPS Catalog number 60390), PDE Binding Agent Diluent (cAMP) (BPS Catalog number 60391), PDE-4B1 (BPS Catalog number 60041), substrate (100 nM FAM-cAMP).

*Assay conditions:* The serial dilution of the compounds was first performed in 100% DMSO with the highest concentration at 0.3mM. Each intermediate compound dilution (in 100% DMSO) will then get directly diluted 10x fold into assay buffer for 10% DMSO and 5µl of the dilution was added to a 50µl reaction so that the final concentration of DMSO is 1% in all of reactions. The enzymatic reactions were conducted at room temperature for 60 minutes in a 50µl mixture containing PDE assay buffer, 100nM FAM-cAMP, a PDE4B1 enzyme and the test compound. After the enzymatic reaction, 100 µl of a binding solution (1:100 dilution of the binding agent with the binding agent diluent) was added to each

---

<sup>3</sup> Gaussian 16, Revision A.03, M. J. Frisch, G. W. Trucks, H. B. Schlegel, G. E. Scuseria, M. A. Robb, J. R. Cheeseman, G. Scalmani, V. Barone, G. A. Petersson, H. Nakatsuji, X. Li, M. Caricato, A. V. Marenich, J. Bloino, B. G. Janesko, R. Gomperts, B. Mennucci, H. P. Hratchian, J. V. Ortiz, A. F. Izmaylov, J. L. Sonnenberg, D. Williams-Young, F. Ding, F. Lipparini, F. Egidi, J. Goings, B. Peng, A. Petrone, T. Henderson, D. Ranasinghe, V. G. Zakrzewski, J. Gao, N. Rega, G. Zheng, W. Liang, M. Hada, M. Ehara, K. Toyota, R. Fukuda, J. Hasegawa, M. Ishida, T. Nakajima, Y. Honda, O. Kitao, H. Nakai, T. Vreven, K. Throssell, J. A. Montgomery, Jr., J. E. Peralta, F. Ogliaro, M. J. Bearpark, J. J. Heyd, E. N. Brothers, K. N. Kudin, V. N. Staroverov, T. A. Keith, R. Kobayashi, J. Normand, K. Raghavachari, A. P. Rendell, J. C. Burant, S. S. Iyengar, J. Tomasi, M. Cossi, J. M. Millam, M. Klene, C. Adamo, R. Cammi, J. W. Ochterski, R. L. Martin, K. Morokuma, O. Farkas, J. B. Foresman, and D. J. Fox, Gaussian, Inc., Wallingford CT, **2016**.

<sup>4</sup> R. L. Martin, P. J. Hay, L.R. Pratt, *J. Phys. Chem. A*, **1998**, *102* (20), pp 3565–3573.

<sup>5</sup> For detailed description of all keywords, basis sets and functionals please refer to Gaussian 16 manual or <http://www.gaussian.com/keywords>.

reaction and the reaction was performed at room temperature for 60 minutes. Fluorescence intensity was measured at an excitation of 485 nm and an emission of 528 nm using a Tecan Infinite M1000 microplate reader.

*Data analysis:* PDE activity assays were performed in duplicate at each concentration. Fluorescence intensity is converted to fluorescence polarization using the Tecan Magellan6 software. The fluorescence polarization data were analyzed using the computer software, Graphpad Prism. The fluorescence polarization (FP<sub>i</sub>) in absence of the compound in each data set was defined as 100% activity. In the absence of PDE and the compound, the value of fluorescent polarization (FP<sub>b</sub>) in each data set was defined as 0% activity. The percent activity in the presence of the compound was calculated according to the following equation: % activity = (FP<sub>i</sub>-FP<sub>b</sub>)/(FP<sub>i</sub>-FP<sub>b</sub>)×100%, where FP= the fluorescence polarization in the presence of the compound. The values of % activity versus a series of compound concentrations were then plotted using non-linear regression analysis of Sigmoidal dose-response curve generated with the equation  $Y=B+(T-B)/1+10^{((\text{LogEC}_{50}-X)\times\text{Hill Slope})}$ , where Y=percent activity, B=minimum percent activity, T=maximum percent activity, X= logarithm of compound and Hill Slope=slope factor or Hill coefficient. The IC<sub>50</sub> value was determined by the concentration causing a half-maximal percent activity.

## 2. In vitro selectivity enzymatic assay for a series of PDE4 isotypes

*Materials:* Apremilast is purchased from Cayman Chemicals (Ann Arbor, MI, Item Number 18502), PDE Assay Buffer (BPS Catalog number 60393), PDE Binding Agent (BPS Catalog number 60390), PDE Binding Agent Diluent (cAMP) (BPS Catalog number 60391).

### *Enzymes and Substrates:*

| Assay   | Catalog # | Enzyme Lot # | Enzyme Used (ng) / Reaction | Substrate       |
|---------|-----------|--------------|-----------------------------|-----------------|
| PDE4A1A | 60040     | 160926-G     | 0.1                         | 100 nM FAM-cAMP |
| PDE4A4B | 60039     | 110411       | 0.06                        | 100 nM FAM-cAMP |
| PDE4A10 | 60038     | 110428-GC    | 0.128                       | 100 nM FAM-cAMP |
| PDE4B2  | 60042     | 121218-G1    | 0.025                       | 100 nM FAM-cAMP |
| PDE4C1  | 60044     | 90812        | 0.24                        | 100 nM FAM-cAMP |
| PDE4D2  | 60048     | 130102-GC    | 0.03                        | 100 nM FAM-cAMP |
| PDE4D3  | 60046     | 121011       | 0.025                       | 100 nM FAM-cAMP |
| PDE4D7  | 60047     | 101101       | 0.045                       | 100 nM FAM-cAMP |

*Assay conditions:* 0.1µM dilutions of the test compounds were prepared in assay buffer (10% DMSO concentration) and 5µl of the dilution was added to a 50µl reaction so that the final concentration of DMSO is 1% in all of reactions. The enzymatic reactions were conducted at room temperature for 60 minutes in a 50µl mixture containing PDE assay buffer, 100nM FAM-cAMP, a PDE enzyme and the test compound. After the enzymatic reaction, 100 µl of a binding solution (1:100 dilution of the binding agent with the binding agent diluent) was added to each reaction and the reaction was performed at room temperature for 60 minutes. Fluorescence intensity was measured at an excitation of 485 nm and an emission of 528 nm using a Tecan Infinite M1000 microplate reader.

*Data analysis:* PDE activity assays were performed in duplicate at each concentration. Fluorescence intensity is converted to fluorescence polarization using the Tecan Magellan6 software. The fluorescence polarization data were analyzed using the computer software, Graphpad Prism. The fluorescence polarization (FP<sub>i</sub>) in absence of the compound in each data set was defined as 100% activity. In the absence of PDE and the compound, the value of fluorescent polarization (FP<sub>b</sub>) in each data set was defined as 0% activity. The percent activity in the presence of the compound was calculated according to the following equation: % activity = (FP-FP<sub>b</sub>)/(FP<sub>i</sub>-FP<sub>b</sub>)×100%, where FP= the fluorescence polarization in the presence of the compound.

### 3. PDE4B Cell Signaling Pathway Assay

*Materials:* HEK293 cell line (ATCC # CRL-1573), MEM/EBSS medium (Hyclone # SH30024.01), Fetal Bovine Serum (ThermoFisher # 26140-079), Non-essential amino acids (Hyclone #SH30238.01), Na-pyruvate (Hyclone #SH30239.01), Penn-strep (Hyclone # SV30010), Lipofectamine™ 2000 (Invitrogen # 11668027), Opti-MEM I Reduced Serum Medium (Invitrogen #31985-062), PDE4B DNA (Origene # RC211956), Forskolin (BPS Bioscience # 27067), ONE-Step luciferase assay system (BPS Bioscience # 60690)

*Cell Culture:* HEK293 cells were cultured in MEM/EBSS medium with 10% Fetal bovine serum, 1% Penn-strep, 1% Non-essential amino acid, 1 mM Na-pyruvate.

*Assay conditions:* HEK293 cells were seeded at 30,000 cells per well into 96-well microplate in 100 µl of growth medium. Cells were incubated at 37°C and 5% CO<sub>2</sub> overnight. The following day, using Lipofectamine 2000, the cells were transiently transfected with a PDEB expression vector and a CRE luciferase reporter. Cells were incubated at 37°C and 5% CO<sub>2</sub> for 6 hours. The cells were then treated with test compounds in 50 ul of fresh growth medium for ~24 hours. Following treatment, Forskolin was added in 5 ul of growth medium to stimulated wells to a final concentration of 10 uM. Cells were placed at 37°C and 5% CO<sub>2</sub> for an additional 5-6 hours. The next day, cells were lysed and a luciferase assay was performed using ONE-Step luciferase assay system: add 100 µl of One-Step Luciferase reagent per well and rock at room temperature for ~30 minutes. Luminescence was measured using a luminometer (BioTek Synergy™ 2 microplate reader).

*Data analysis:* Cell based assays were performed in triplicate at each concentration. To obtain the normalized luciferase activity of CRE reporter, subtract background luminescence then from the CRE reporter. The normalized luciferase activity data was analyzed using the Graphpad Prism. In the absence of the compound, the normalized luciferase activity (L<sub>i</sub>) in each data set was defined as 1. The fold induction in the presence of each compound was calculated according to the following equation: fold induction = L/L<sub>i</sub>, where L= the normalized luciferase activity in the presence of the compound, L<sub>i</sub>= the normalized luciferase activity in the absence of the compound. The values of % luminescence versus a series of compound concentrations were then plotted using non-linear regression analysis of Sigmoidal dose-response curve generated with the equation  $Y=B+(T-B)/1+10^{((\text{LogEC}_{50}-X)\times\text{Hill Slope})}$ , where Y=percent luminescence, B=minimum percent luminescence, T=maximum percent luminescence, X= logarithm of compound and Hill Slope=slope factor or Hill coefficient. The EC<sub>50</sub> value was determined by the concentration causing a half-maximal percent activity.

## 2. Synthetic procedures and characterization data

### 7-(3-(cyclopropylmethoxy)-4-(difluoromethoxy)phenyl)hexahydro-3H-pyrrolo[1,2-c]imidazol-3-one (1a)

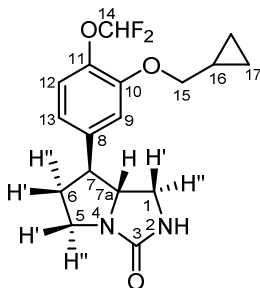

#### *Rel*-(7*S*,7*aR*)-**1a** (*rac*-**1a**)

To a solution of azide **12a** (0.162 g, 0.407 mmol) in methanol (6 ml) in a vial equipped with a magnetic stirrer was added  $\text{Boc}_2\text{O}$  (0.089 g, 0.407 mmol). Then a suspension of Raney<sup>®</sup> nickel (ca. 100 mg, washed with methanol) in methanol (2 ml) was added. The vial was placed to a steel autoclave which was flushed and filled with  $\text{H}_2$  to a pressure of 20 bar. The mixture was stirred at r.t. for 2 h, then the autoclave was heated to 60°C and the mixture was stirred at this temperature for 6 h. Then the autoclave was cooled to r.t., slowly evacuated and the catalyst was removed. The solvent was then evaporated under vacuum. The residue was dissolved in DMSO (5 ml) and the resulting solution was gently refluxed for 30 min in argon atmosphere. Then the solvent was evaporated under vacuum (ca. 100°C, 10 Torr) and the residue was subjected to a column chromatography on silica gel (eluent: Hexane/EtOAc = 1:1 → EtOAc/MeOH = 1:0 → 10:1) to yield 0.075 g (55%) of pyrroloimidazolidinone *rac*-**1a**. Yellow solid, m.p. = 127–129°C.  $R_f$  = 0.71 (EtOAc/MeOH = 3:1).

#### (–)-(7*S*,7*aR*)-**1a**

To a solution of azide **12c** (0.011 g, 0.021 mmol) in methanol (2 ml) in a vial equipped with a magnetic stirrer was added  $\text{Boc}_2\text{O}$  (0.005 g, 0.021 mmol). Then a suspension of Raney<sup>®</sup> nickel (ca. 10 mg, washed with methanol) in methanol (0.5 ml) was added. The test tube was placed to a steel autoclave which was flushed and filled with  $\text{H}_2$  to a pressure of 10 bar. The mixture was stirred at r.t. for 2 h. Then the autoclave was slowly evacuated and the catalyst was removed. The solvent was then evaporated under vacuum. The residue was dissolved in DMSO (1 ml) and the resulting solution was gently refluxed for 30 min in argon atmosphere. Then the solvent was evaporated under vacuum (ca. 100°C, 10 Torr) and the residue was subjected to a column chromatography on silica gel (eluent: Hexane/EtOAc = 1:1 → EtOAc/MeOH = 1:0 → 10:1) to yield 0.003 g (42%) of pyrroloimidazolidinone (–)-(7*S*,7*aR*)-**1a**. Yellow oil.

<sup>1</sup>H NMR (300 MHz, COSY, HSQC, NOESY,  $\text{CDCl}_3$ )  $\delta$  7.10 (d,  $J$  = 7.8 Hz, 1H, 12-CH), 6.78 (s, 1H, 9-CH), 6.77 (d,  $J$  = 7.8 Hz, 1H, 13-CH), 6.59 (t,  $J$  = 75.6 Hz, 1H, 14-CHF<sub>2</sub>), 6.01 (s, br, 1H, 2-NH), 3.85 (d,  $J$  = 6.9 Hz, 2H, 15-CH<sub>2</sub>), 3.78 – 3.61 (m, 2H, 5-CH' and 7a-CH), 3.52 (dd,  $J$  = 10.2, 8.0 Hz, 1H, 1-CH), 3.33 (ddd,  $J$  = 10.2, 9.7, 2.7 Hz, 1H, 5-CH''), 3.29 (dd,  $J$  = 10.8, 10.2 Hz, 1H, 1-CH), 2.76 (ddd,  $J$  = 11.1, 10.6, 8.0 Hz, 1H, 7-CH), 2.37 (dddd,  $J$  = 12.6, 8.1, 8.0, 2.7 Hz, 1H, 6-CH''), 2.04 (dddd,  $J$  = 12.6, 11.1, 9.7, 9.1 Hz, 1H, 6-CH'), 1.34 – 1.13 (m, 1H, 16-CH), 0.63 (m, 2H, 17-CH<sub>2</sub>), 0.34 (m, 2H, 17-CH<sub>2</sub>).

<sup>13</sup>C NMR (75 MHz, HSQC,  $\text{CDCl}_3$ )  $\delta$  165.96 (3-C), 150.84 (10-C), 139.52 (t,  $J$  = 4.2 Hz, 11-C), 138.27 (8-C), 123.11 (12-C), 120.04 (13-C), 116.27 (t,  $J$  = 259.5 Hz, 14-C), 113.97 (9-C), 74.11 (15-C), 66.15 (7a-C), 48.76 (7-C), 45.26 (5-C), 41.37 (1-C), 34.59 (6-C), 10.25 (16-C), 3.26 (17-C).

Characteristic 2D-NOESY correlations: 7a-CH/9-CH, 7a-CH/13-CH, 7-CH/6-CH''.

$^{19}\text{F}$  NMR (188 MHz,  $\text{CDCl}_3$ )  $\delta$  -81.42 (d,  $J = 75.4$  Hz).

HRMS (ESI):  $m/z$  calcd. for  $[\text{C}_{17}\text{H}_{21}\text{F}_2\text{N}_2\text{O}_3]^+$  339.1515, found 339.1511  $[\text{M}+\text{H}]^+$ .

For (-)-(7S,7aR)-**1a**:

Optical rotation:  $[\alpha]_D^{20} = -22^\circ$  ( $\text{CHCl}_3$ ,  $C = 0.3$  g/100ml).

Chiral HPLC: e.e. 96% (RT: 20.2 min; Column: CHIRALPAK IA-3; Solvent: Hexane/*i*-PrOH = 90:10; Temperature: 40°C; Flow rate: 1 ml/min; Injection volume: 5  $\mu\text{L}$ ).

***Rel*-(7*S*,7*aR*)-7-(4-(benzyloxy)-3-(cyclopropylmethoxy)phenyl)hexahydro-3*H*-pyrrolo[1,2-*c*]imidazol-3-one (**1b**)**

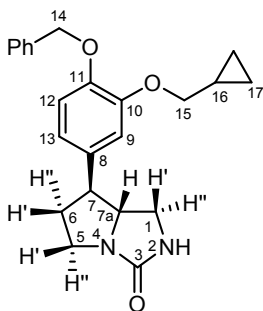

To a solution of azide **12b** (0.142 g, 0.324 mmol) in methanol (2 ml) in a vial equipped with a magnetic stirrer were added Boc<sub>2</sub>O (0.0704 g, 0.324 mmol) and triethylamine (0.090 ml, 0.648 mmol). Then a suspension of Raney<sup>®</sup> nickel (ca. 30 mg, washed with methanol) in methanol (1 ml) was added. The vial was placed to a steel autoclave which was flushed and filled with H<sub>2</sub> to a pressure of 50 bar. The mixture was stirred at r.t. for 1 h, then the autoclave was heated to 50°C and the mixture was stirred at this temperature for 3 h. The autoclave was cooled to r.t., then evacuated and Raney<sup>®</sup> nickel (ca. 30 mg) was added. The autoclave was filled with H<sub>2</sub> (50 bar) and the mixture was stirred for 1 h at 50°C. Then the autoclave was cooled to r.t., slowly evacuated and the catalyst was removed. The solvent was then evaporated under vacuum. The residue was dissolved in recrystallized DMSO (1 ml). The resulting solution was degassed under vacuum for 15 min and then gently refluxed for 50 min in argon atmosphere. Then the solvent was evaporated under vacuum (ca. 100°C, 10 Torr) and the residue was subjected to a column chromatography on silica gel (eluent: Hexane/EtOAc = 1:1 → 0:1) to yield 0.053 g (43%) of pyrroloimidazolidinone **1b**. Brown solid, m.p. = 103–105°C (recrystallized from Hexanes/MTBE = 1:1). R<sub>f</sub> = 0.78 (EtOAc/MeOH = 3:1).

<sup>1</sup>H NMR (300 MHz, CDCl<sub>3</sub>) δ 7.50 – 7.28 (m, 5H, Ph), 6.87 (d, J = 8.2 Hz, 1H, 12-CH), 6.78 (d, J = 2.1 Hz, 1H, 9-CH), 6.71 (dd, J = 8.2, 2.1 Hz, 1H, 13-CH), 5.13 (s, 2H, 14-CH<sub>2</sub>), 5.07 (s, 1H, 2-NH), 3.88 (d, J = 6.8 Hz, 2H, 15-CH<sub>2</sub>), 3.76 – 3.64 (m, 2H, 5-CH' and 7a-CH), 3.52 (dd, J = 9.9, 8.7 Hz, 1H, 1-CH), 3.36 (ddd, J = 9.8, 9.2, 2.6 Hz, 1H, 5-CH'), 3.30 (dd, J = 11.1, 9.9 Hz, 1H, 1-CH), 2.80 – 2.65 (m, 1H, 7-CH), 2.37 (dddd, J = 12.6, 8.1, 8.1, 2.6 Hz, 1H, 6-CH), 2.05 (dddd, J = 12.6, 12.5, 9.2, 9.2 Hz, 1H, 6-CH), 1.39 – 1.22 (m, 1H, 16-CH), 0.63 (m, 2H, 17-CH<sub>2</sub>), 0.36 (m, 2H, 17-CH<sub>2</sub>).

<sup>13</sup>C NMR (75 MHz, CDCl<sub>3</sub>) δ 165.63 (3-C), 149.75 (10-C), 148.35 (11-C), 137.56 (i-Ph), 132.79 (8-C), 128.60 (m-Ph), 127.90 (13-C), 127.36 (o-Ph), 120.35 (p-Ph), 115.73 (12-C), 114.66 (9-C), 74.65 (15-C), 71.64 (14-C), 66.16 (7a-C), 48.69 (7-C), 45.35 (5-C), 41.40 (1-C), 34.64 (6-C), 10.64 (16-C), 3.43 (17-C).

HRMS (ESI): m/z calcd. for [C<sub>23</sub>H<sub>27</sub>N<sub>2</sub>O<sub>3</sub>]<sup>+</sup> 379.2016, found 379.2025 [M+H]<sup>+</sup>.



***Rel*-(7*S*,7*aR*)-7-(3-(cyclopropylmethoxy)-4-hydroxyphenyl)hexahydro-3*H*-pyrrolo[1,2-*c*]imidazol-3-one (**1c**)**

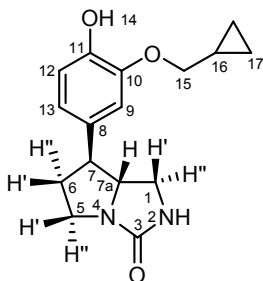

To a solution of benzyl ether **1b** (0.071 g, 0.188 mmol) in methanol (2 ml) in a vial was added Pd/C (0.035 g, 10 wt%). The vial was placed to a steel autoclave which was flushed and filled with H<sub>2</sub> to a pressure of 45 bar. The autoclave was heated to 60°C and the mixture was stirred at this temperature for 3 h, then the autoclave was cooled to r.t., slowly evacuated and the catalyst was removed by centrifugation. The resulting solution was evaporated and dried under vacuum to yield 0.051 g (94%) of phenol **1c**. White solid, m.p. = 152–153°C.

<sup>1</sup>H NMR (300 MHz, CDCl<sub>3</sub>) δ 6.89 (d, J = 8.5 Hz, 1H, 12-CH), 6.71 (d, J = 8.5 Hz, 1H, 13-CH), 6.67 (s, 1H, 9-CH), 5.77 (s, br, 1H, 2-NH), 5.13 (s, 1H, 14-OH), 3.87 (d, J = 7.1 Hz, 2H, 15-CH<sub>2</sub>), 3.79 – 3.62 (m, 2H, 5-CH' and 7a-CH), 3.52 (dd, J = 10.0, 8.9 Hz, 1H, 1-CH), 3.41 – 3.28 (m, 1H, 5-CH''), 3.30 (dd, J = 11.1, 10.0 Hz, 1H, 1-CH), 2.72 (m, 1H, 7-CH), 2.36 (m, 1H, 6-CH''), 2.03 (m, 1H, 6-CH'), 1.34 – 1.19 (m, 1H, 16-CH), 0.67 (m, 2H, 17-CH<sub>2</sub>), 0.36 (m, 2H, 17-CH<sub>2</sub>).

<sup>13</sup>C NMR (75 MHz, CDCl<sub>3</sub>) δ 165.71 (3-C), 146.31 and 145.30 (10-C and 11-C), 131.06 (8-C), 120.45 (12-C), 114.79 (13-C), 111.50 (9-C), 74.29 (15-C), 66.21 (7a-C), 48.84 (7-C), 45.33 (5-C), 41.38 (1-C), 34.73 (6-C), 10.46 (16-C), 3.45 (17-C).

HRMS (ESI): m/z calcd. for [C<sub>16</sub>H<sub>20</sub>N<sub>2</sub>O<sub>3</sub>Na]<sup>+</sup> 311.1366, found 311.1358 [M+Na]<sup>+</sup>.

***Rel*-(7*S*,7*aR*)-7-(3-(cyclopropylmethoxy)-4-(difluoromethoxy)phenyl)-2-methylhexahydro-3H-pyrrolo[1,2-*c*]imidazol-3-one (**1d**)**

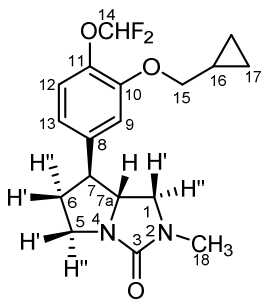

A solution of pyrroloimidazolidinone *rac*-**1a** (0.014 g, 0.044 mmol) in dry THF in Schlenk flask under argon atmosphere was cooled to 0°C. NaH (60% suspension in oil, 0.0075 g, 0.178 mmol) was added and the reaction mixture was stirred for 40 min. Then CH<sub>3</sub>I (5.5 μl, 0.089 mmol) was added, the reaction mixture was stirred for 2 h allowing to warm to r.t. Methanol (5 ml) was added and the solvent was evaporated under vacuum. The residue was subjected to a column chromatography on silica gel (eluent: EtOAc/MeOH = 1:0 → 10:1) to yield 0.0137 g (88%) of methylated amide **1d**. Yellow oil. *R*<sub>f</sub> = 0.69 (EtOAc/MeOH = 3:1).

<sup>1</sup>H NMR (300 MHz, CDCl<sub>3</sub>) δ 7.12 (d, *J* = 7.6 Hz, 1H, 12-CH), 6.79 (s, 1H, 9-CH), 6.78 (d, *J* = 7.6 Hz, 1H, 13-CH), 6.60 (t, *J* = 75.6 Hz, 1H, 14-CHF<sub>2</sub>), 3.87 (d, *J* = 6.9 Hz, 2H, 15-CH<sub>2</sub>), 3.72 (ddd, *J* = 11.6, 8.5, 7.9 Hz, 1H, 7*a*-CH), 3.62 (ddd, *J* = 9.6, 7.9, 1.8 Hz, 1H, 5-CH''), 3.41 (dd, *J* = 9.7, 7.9 Hz, 1H, 1-CH), 3.40 – 3.32 (m, 1H, 5-CH'), 3.22 (dd, *J* = 9.7, 1.8 Hz, 1H, 1-CH), 2.84 (s, 3H, 18-CH<sub>3</sub>), 2.74 – 2.62 (m, 1H, 7-CH), 2.36 (dddd, *J* = 12.8, 12.8, 7.9, 2.1 Hz, 1H, 6-CH''), 2.03 (m, 1H, 6-CH'), 1.36 – 1.20 (m, 1H, 16-CH), 0.66 (m, 2H, 17-CH<sub>2</sub>), 0.36 (m, 2H, 17-CH<sub>2</sub>).

<sup>13</sup>C NMR (75 MHz, CDCl<sub>3</sub>) δ 163.95 (3-C), 150.96 (10-C), 139.61 (t, *J* = 3.1 Hz, 11-C), 138.52 (8-C), 123.22 (12-C), 120.25 (13-C), 116.30 (t, *J* = 260.0 Hz, 14-C), 113.97 (9-C), 74.24 (15-C), 63.27 (7*a*-C), 49.28 (7-C), 48.28 (5-C), 46.05 (1-C), 34.72 (6-C), 31.00 (18-C), 10.34 (16-C), 3.35 (17-C).

<sup>19</sup>F NMR (282 MHz, CDCl<sub>3</sub>) δ -82.44 (d, *J* = 75.5 Hz).

HRMS (ESI): *m/z* calcd. for [C<sub>18</sub>H<sub>23</sub>F<sub>2</sub>N<sub>2</sub>O<sub>3</sub>]<sup>+</sup> 353.1671, found 353.1668 [M+H]<sup>+</sup>.

***Rel*-(7S,7aR)-7-(3-(cyclopropylmethoxy)-4-(difluoromethoxy)phenyl)hexahydro-3H-pyrrolo[1,2-c]imidazole-3-thione (**1e**)**

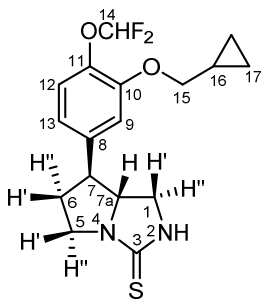

To a stirred solution of pyrroloimidazolidinone *rac*-**1a** (0.0335 mg, 0.099 mmol) in toluene (2 ml) Lawesson's reagent (0.0515 g, 0.129 mmol) was added. The reaction mixture was stirred at 100°C for 1.5 h under argon atmosphere, then cooled to r.t. and evaporated under vacuum. The residue was subjected to a column chromatography on silica gel (eluent: Hexane/EtOAc = 1:0 → 5:1 → 3:1) to yield 0.014 g (40%) of thione **1e**. White solid, m.p. = 109.7–111.3°C.  $R_f$  = 0.86 (EtOAc).

<sup>1</sup>H NMR (300 MHz, CDCl<sub>3</sub>) δ 7.12 (d, J = 7.7 Hz, 1H, 12-CH), 6.78 (s, 1H, 9-CH), 6.76 (d, J = 7.7 Hz, 1H, 13-CH), 6.60 (t, J = 75.5 Hz, 1H, 14-CHF<sub>2</sub>), 6.50 (s, 1H, 2-NH), 4.08 (m, 2H, 5-CH' and 7a-CH), 3.86 (d, J = 6.9 Hz, 2H, 15-CH<sub>2</sub>), 3.70 (dd, J = 10.0, 9.7 Hz, 1H, 1-CH), 3.58 (ddd, J = 12.1, 9.6, 2.7 Hz, 1H, 5-CH'), 3.47 (dd, J = 10.0, 4.1 Hz, 1H, 1-CH), 2.84 (ddd, J = 11.8, 10.9, 7.8 Hz, 1H, 7-CH), 2.48 (dddd, J = 12.7, 8.0, 7.8, 2.7 Hz, 1H, 6-CH''), 2.15 (dddd, J = 12.7, 11.8, 9.6, 9.3 Hz, 1H, 6-CH'), 1.38 – 1.17 (m, 1H, 16-CH), 0.70 – 0.61 (m, 2H, 17-CH<sub>2</sub>), 0.35 (m, 2H, 17-CH<sub>2</sub>).

<sup>13</sup>C NMR (75 MHz, CDCl<sub>3</sub>) δ 187.12 (3-C), 151.04 (10-C), 139.76 (t, J = 2.9 Hz, 11-C), 137.32 (8-C), 123.32 (12-C), 119.96 (13-C), 116.22 (t, J = 260.0 Hz, 14-C), 113.84 (9-C), 74.22 (15-C), 69.33 (7a-C), 49.02 (7-C), 47.52 (5-C), 45.87 (1-C), 34.56 (6-C), 10.28 (16-C), 3.33 (17-C).

<sup>19</sup>F NMR (282 MHz, CDCl<sub>3</sub>) δ -82.47 (d, J = 75.5 Hz).

HRMS (ESI): m/z calcd. for [C<sub>17</sub>H<sub>21</sub>F<sub>2</sub>N<sub>2</sub>O<sub>2</sub>S]<sup>+</sup> 355.1286, found 355.1276 [M+H]<sup>+</sup>.

**Rel-(4*S*,4*a*R)-4-(3-(cyclopropylmethoxy)-4-(difluoromethoxy)phenyl)hexahydro-7*H*-imidazo[1,5-*b*][1,2]oxazin-7-one (2a)**

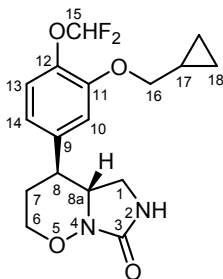

To a solution of azide **22a** (0.061 g, 0.172 mmol, 6.5 : 1 mixture of isomers) in methanol (1.5 ml) in a Schlenk flask equipped with a magnetic stirrer was added a solution of Boc<sub>2</sub>O (0.0375 g, 0.172 mmol) in methanol (0.5 ml). Then a suspension of Raney<sup>®</sup> nickel (ca. 100 mg, washed with methanol) in methanol (1 ml) was added. The flask was connected to a balloon filled with H<sub>2</sub> (1 bar). The mixture was stirred at r.t. for 10 min, then the balloon was disconnected and the catalyst was removed and washed with hot methanol (5 × 3 ml). The solvent was then evaporated under vacuum. The residue was subjected to a column chromatography on silica gel (eluent: Hexane/EtOAc = 5:1 → 1:1) to yield 0.045 g (61%) of Boc-protected amino oxazine which was immediately used in the next step.

The Boc-protected amino oxazine (0.045 g, 0.105 mmol) was dissolved in CH<sub>2</sub>Cl<sub>2</sub> (1 ml) and the solution was cooled to 0°C. Trifluoroacetic acid (0.5 ml) was added and the mixture was stirred at 0°C for 1 h, then it was evaporated and dried under vacuum. The residue was dissolved in CH<sub>2</sub>Cl<sub>2</sub> (0.5 ml) and the resulting solution was cooled to 0°C. A solution of triphosgene (0.018 mg, 0.06 mmol) in CH<sub>2</sub>Cl<sub>2</sub> (0.5 ml) and triethylamine (0.090 ml, 0.624 mmol) were added, and the reaction mixture was stirred at 0°C under argon for 1 h. The solution was evaporated under vacuum and the residue was subjected to a column chromatography on silica gel (eluent: Hexane/EtOAc = 1:1 → 0:1) to yield 0.014 g (23%) of **2a**. Colorless oil. R<sub>f</sub> = 0.62 (EtOAc/MeOH = 3:1).

<sup>1</sup>H NMR (300 MHz, COSY, HSQC, NOESY, CDCl<sub>3</sub>) δ 7.13 (d, J = 7.8 Hz, 1H, 13-CH), 6.80 (s, 1H, 10-CH), 6.79 (d, J = 7.8 Hz, 1H, 14-CH), 6.61 (t, J = 75.5 Hz, 1H, 15-CHF<sub>2</sub>), 5.47 (s, 1H, 2-NH), 4.09 (ddd, J = 10.7, 4.8, 2.3 Hz, 1H, 6-CH''eq), 4.02 (ddd, J = 12.0, 10.7, 2.1 Hz, 1H, 6-CH'ax), 3.87 (d, J = 6.9 Hz, 2H, 16-CH<sub>2</sub>), 3.86 – 3.81 (m, 1H, 8a-CH), 3.29 (dd, J = 9.0, 6.7 Hz, 1H, 1-CH), 3.02 (ddd, J = 9.0, 2.5 Hz, 1H, 1-CH), 2.87 (ddd, J = 12.3, 10.5, 4.1 Hz, 1H, 8-CH<sub>ax</sub>), 2.14 (dddd, J = 13.8, 12.3, 12.0, 4.8 Hz, 1H, 7-CH'ax), 1.90 (dddd, J = 13.8, 4.1, 2.3, 2.1 Hz, 1H, 7-CH''eq), 1.36 – 1.20 (m, 1H, 17-CH), 0.70 – 0.61 (m, 2H, 18-CH<sub>2</sub>), 0.40 – 0.33 (m, 2H, 18-CH<sub>2</sub>).

<sup>13</sup>C NMR (75 MHz, HSQC, CDCl<sub>3</sub>) δ 160.22 (3-C), 151.04 (11-C), 139.85 (9-C), 139.14 (12-C), 123.32 (13-C), 120.38 (14-C), 116.22 (t, J = 260.0 Hz, 15-C), 114.13 (10-C), 74.24 (16-C), 69.73 (6-C), 60.30 (8a-C), 41.79 (8-C), 40.60 (1-C), 31.38 (7-C), 10.30 (17-C), 3.34 (18-C).

Characteristic 2D-NOESY correlations: 8a-CH/10-CH, 8a-CH/14-CH, 8-CH/7-CH''eq.

<sup>19</sup>F NMR (282 MHz, CDCl<sub>3</sub>) δ -81.69 (d, J = 75.5 Hz).

HRMS (ESI): m/z calcd. for [C<sub>17</sub>H<sub>21</sub>F<sub>2</sub>N<sub>2</sub>O<sub>4</sub>]<sup>+</sup> 355.1464, found 355.1459 [M+H]<sup>+</sup>.

**Rel-(4*S*,4*aR*)-4-(3-(cyclopropylmethoxy)-4-(difluoromethoxy)phenyl)-2,2-dimethylhexahydro-7*H*-imidazo[1,5-*b*][1,2]oxazin-7-one (2*b*)**

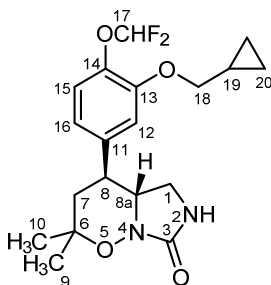

To a solution of azide **22b** (0.152 g, 0.398 mmol) in methanol (2 ml) in a vial equipped with a magnetic stirrer was added a suspension of Raney<sup>®</sup> nickel (ca. 100 mg, washed with methanol) in methanol (0.5 ml). The vial was placed to a steel autoclave which was flushed and filled with H<sub>2</sub> to a pressure of 10 bar. The mixture was stirred at r.t. for 1 h, then the autoclave was evacuated and Raney<sup>®</sup> nickel (ca. 50 mg) was added. The autoclave was filled with H<sub>2</sub> (10 bar) and the mixture was stirred for 40 min. Then the autoclave was slowly evacuated and the catalyst was removed. The solvent was then evaporated under vacuum. The residue was dissolved in CH<sub>2</sub>Cl<sub>2</sub> (2.8 ml) and the resulting solution was cooled to 0°C. A solution of triphosgene (0.059 mg, 0.199 mmol) in CH<sub>2</sub>Cl<sub>2</sub> (1 ml) and triethylamine (0.170 ml, 1.20 mmol) were added, and the reaction mixture was stirred at r.t. under argon for 2 h. 10% aqueous solution of HCl (10 ml) was added, and the reaction mixture was poured into a mixture of CH<sub>2</sub>Cl<sub>2</sub> (50 ml) and water (50 ml). The aqueous layer was back-extracted with CH<sub>2</sub>Cl<sub>2</sub> (2 × 30 ml). The combined organic layers were washed with water (2 × 50 ml) and brine (50 ml), dried over Na<sub>2</sub>SO<sub>4</sub> and evaporated under vacuum. The residue was subjected to a column chromatography on silica gel (eluent: Hexane/EtOAc = 1:1 → 0:1) to yield 0.078 g (51%) of **2b**. White solid, m.p. = 163–165°C. R<sub>f</sub> = 0.71 (EtOAc/MeOH = 3:1).

<sup>1</sup>H NMR (400 MHz, CDCl<sub>3</sub>) δ 7.13 (d, J = 8.7 Hz, 1H, 15-CH), 6.78 (dd, J = 8.7, 2.0 Hz, 1H, 16-CH), 6.77 (d, J = 2.0 Hz, 1H, 12-CH), 6.61 (t, J = 75.5 Hz, 1H, 17-CHF<sub>2</sub>), 4.62 (s, 1H, 2-NH), 3.88 (d, J = 6.9 Hz, 2H, 18-CH<sub>2</sub>), 3.67 (ddd, J = 10.9, 7.3, 6.2 Hz, 1H, 8a-CH), 3.30 (dd, J = 9.3, 7.3 Hz, 1H, 1-CH), 3.06 (dd, J = 9.3, 6.2 Hz, 1H, 1-CH), 3.03 (dd, J = 10.9, 6.2 Hz, 1H, 8-CH), 1.86 – 1.80 (m, 2H, 7-CH<sub>2</sub>), 1.48 (s, 3H, 9-CH<sub>3</sub> or 10-CH<sub>3</sub>), 1.38 (s, 3H, 9-CH<sub>3</sub> or 10-CH<sub>3</sub>), 1.31 – 1.23 (m, 1H, 19-CH), 0.69 – 0.63 (m, 2H, 20-CH<sub>2</sub>), 0.41 – 0.32 (m, 2H, 20-CH<sub>2</sub>).

<sup>13</sup>C NMR (101 MHz, CDCl<sub>3</sub>) δ 160.13 (3-C), 151.09 (13-C), 139.88 (11-C), 138.90 (14-C), 123.34 (15-C), 120.18 (16-C), 116.25 (t, J = 260.0 Hz, 17-C), 113.93 (12-C), 79.81 (6-C), 74.30 (18-C), 60.32 (8a-C), 42.98 (7-C), 41.25 (1-C), 40.96 (8-C), 28.51 and 23.00 (9-C and 10-C), 10.34 (19-C), 3.36 (20-C).

Characteristic trans-diaxial J constant: J = 10.9 Hz (8-CH/8a-CH)

<sup>19</sup>F NMR (282 MHz, CDCl<sub>3</sub>) δ -82.48 (d, J = 75.7 Hz).

HRMS (ESI): m/z calcd. for [C<sub>19</sub>H<sub>25</sub>F<sub>2</sub>N<sub>2</sub>O<sub>4</sub>]<sup>+</sup> 383.1777, found 383.1775 [M+H]<sup>+</sup>.

## 2-(cyclopropylmethoxy)-1-(difluoromethoxy)-4-(2-nitroprop-1-en-1-yl)benzene (4a)

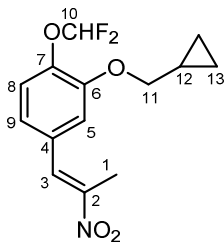

To a solution of 3-(cyclopropylmethoxy)-4-(difluoromethoxy)benzaldehyde **6a** (0.811 g, 3.35 mmol) in nitroethane (6.7 ml) ammonium acetate (0.258 g, 3.35 mmol) and AcOH (3 ml) were added. The reaction mixture was intensively stirred at 90°C under argon atmosphere for 9 h and evaporated under vacuum. The residue was subjected to a column chromatography on silica gel (eluent: Hexane/EtOAc = 1:0 → 20:1) to yield 0.542 g (54%) of nitroalkene **4a**. Yellow oil.  $R_f = 0.58$  (Hexane/EtOAc = 3:1).

$^1\text{H NMR}$  (300 MHz,  $\text{CDCl}_3$ )  $\delta$  7.98 (s, 1H, 3-CH), 7.20 (d,  $J = 7.9$  Hz, 1H, 8-CH), 7.00 (d,  $J = 7.9$  Hz, 1H, 9-CH), 6.99 (s, 1H, 5-CH), 6.68 (t,  $J = 75.1$  Hz, 1H, 10-CHF<sub>2</sub>), 3.89 (d,  $J = 6.9$  Hz, 2H, 11-CH<sub>2</sub>), 2.42 (s, 3H, 2-CH<sub>3</sub>), 1.38 – 1.18 (m, 1H, 12-CH), 0.65 (m, 2H, 13-CH<sub>2</sub>), 0.36 (m, 2H, 13-CH<sub>2</sub>).

$^{13}\text{C NMR}$  (75 MHz,  $\text{CDCl}_3$ )  $\delta$  150.66 (7-C), 148.01 (2-C), 141.54 (6-C), 132.60 (3-C), 130.85 (4-C), 122.90 (8-C), 122.67 (9-C), 116.07 (5-C), 115.98 (t,  $J = 260.5$  Hz, 10-C), 74.17 (11-C), 14.00 (1-C), 10.11 (12-C), 3.25 (13-C).

$^{19}\text{F NMR}$  (282 MHz,  $\text{CDCl}_3$ )  $\delta$  -82.59 (d,  $J = 74.9$  Hz).

HRMS (ESI):  $m/z$  calcd. for  $[\text{C}_{14}\text{H}_{16}\text{F}_2\text{NO}_4]^+$  300.1042, found 300.1048  $[\text{M}+\text{H}]^+$ .

**1-(benzyloxy)-2-(cyclopropylmethoxy)-4-(2-nitroprop-1-en-1-yl)benzene (4b)**

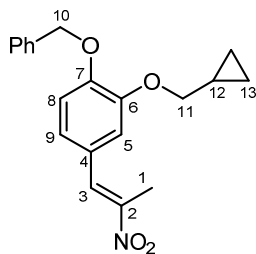

To a solution of 4-(benzyloxy)-3-(cyclopropylmethoxy)benzaldehyde **6b** (0.416 g, 1.47 mmol) in nitroethane (2.5 ml) ammonium acetate (0.120 g, 1.48 mmol) and AcOH (1.3 ml) were added. The reaction mixture was intensively stirred at 90°C under argon atmosphere for 10 h and evaporated under vacuum. The residue was subjected to a column chromatography on silica gel (eluent: Hexane/EtOAc = 1:0 → 10:1) to yield 0.387 g (77%) of nitroalkene **4b**. Yellow solid, m.p. = 74–75°C (recrystallized from ethanol).  $R_f$  = 0.58 (Hexane/EtOAc = 3:1).

$^1\text{H}$  NMR (300 MHz,  $\text{CDCl}_3$ )  $\delta$  8.02 (s, 1H, 3-CH), 7.51 – 7.29 (m, 5H, Ph), 7.37 (d,  $J$  = 8.2 Hz, 1H, 8-CH), 7.01 (s, 1H, 5-CH), 6.95 (d,  $J$  = 8.2 Hz, 1H, 9-CH), 5.22 (s, 2H, 10- $\text{CH}_2$ ), 3.91 (d,  $J$  = 6.9 Hz, 2H, 11- $\text{CH}_2$ ), 2.46 (s, 3H, 2- $\text{CH}_3$ ), 1.41 – 1.21 (m, 1H, 12-CH), 0.65 (m, 2H, 13- $\text{CH}_2$ ), 0.37 (m, 2H, 13- $\text{CH}_2$ ).

$^{13}\text{C}$  NMR (75 MHz,  $\text{CDCl}_3$ )  $\delta$  150.80, 149.34 and 146.09 (2-C, 6-C and 7-C), 136.81 (i-Ph), 133.87 (3-C), 128.72 (m-Ph), 128.12 (9-C), 127.24 (o-Ph), 125.63 (4-C), 124.41 (p-Ph), 116.83 (8-C), 114.62 (5-C), 74.59 (11-C), 71.15 (10-C), 14.30 (1-C), 10.48 (12-C), 3.47 (13-C).

HRMS (ESI):  $m/z$  calcd. for  $[\text{C}_{20}\text{H}_{21}\text{NO}_4]^+$  340.1543, found 340.1544  $[\text{M}+\text{H}]^+$ .

Elemental analysis: calcd. C, 70.78; H, 6.24; N, 4.13; found C, 71.01; H, 6.23; N, 4.16.

#### 4-(difluoromethoxy)-3-hydroxybenzaldehyde (**5a**)

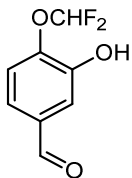

##### *Preparation procedure from ethyl 2-bromo-2,2-difluoroacetate*

To a stirred solution of 3,4-dihydroxybenzaldehyde **3** (5.0 g, 36.2 mmol) and ethyl 2-bromo-2,2-difluoroacetate (4.78 ml, 36.2 mmol) in DMF (50 ml) and water (1 ml) mixture was added NaOH (2.9 g, 72.4 mmol). The reaction mixture was intensively stirred at 70°C for 2 h and then the resulting solution was poured into a mixture of EtOAc (50 ml) and 10% solution of HCl (50 ml). The aqueous layer was back-extracted with EtOAc (2 × 30 ml). The combined organic layers were washed with water (50 ml) and brine (50 ml), dried over Na<sub>2</sub>SO<sub>4</sub> and evaporated under vacuum. The residue was subjected to a column chromatography on silica gel (eluent: Hexane/EtOAc = 10:1 → 5:1) to yield 3.43 g (50%) of 4-(difluoromethoxy)-3-hydroxybenzaldehyde **5a**. White solid. R<sub>f</sub> = 0.24 (Hexane/EtOAc = 3:1).

##### *Preparation procedure from potassium 2-bromo-2,2-difluoroacetate*

To a stirred solution of 3,4-dihydroxybenzaldehyde **3** (0.500 g, 3.62 mmol) and potassium 2-bromo-2,2-difluoroacetate (0.772 g, 3.62 mmol) in DMF (5 ml) and water (0.1 ml) mixture was added NaOH (0.145 g, 3.62 mmol). The reaction mixture was intensively stirred at 70°C for 2 h and then the resulting solution was poured into a mixture of Et<sub>2</sub>O (20 ml) and 10% solution of HCl (20 ml). The aqueous layer was back-extracted with Et<sub>2</sub>O (20 ml). The combined organic layers were washed with water (20 ml) and brine (20 ml), dried over Na<sub>2</sub>SO<sub>4</sub> and evaporated under vacuum. The residue was subjected to a column chromatography on silica gel (eluent: Hexane/EtOAc = 10:1 → 5:1) to yield 0.360 g (53%) of 4-(difluoromethoxy)-3-hydroxybenzaldehyde **5a**. White solid. R<sub>f</sub> = 0.24 (Hexane/EtOAc = 3:1).

<sup>1</sup>H NMR spectrum is concordant with the one reported in literature.<sup>6</sup>

---

<sup>6</sup> S. J. Williams, S. C. Zammit, A. J. Cox, D. M. Shackleford, J. Morizzi, Y. Zhang, A. K. Powell, R. E. Gilbert, H. Krum and D. J. Kelly, *Bioorganic & Medicinal Chemistry Letters*, **2013**, 23, 6868-6873.



#### 4-(benzyloxy)-3-hydroxybenzaldehyde (**5b**)

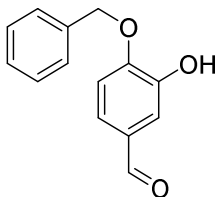

To a stirred solution of 3,4-dihydroxybenzaldehyde **3** (4.6 g, 33.3 mmol) in DMF (40 ml) were added  $K_2CO_3$  (4.14 g, 30.0 mmol), KI (0.112 g, 0.675 mmol) and benzyl bromide (4.4 ml, 37.1 mmol). The reaction mixture was stirred at 60°C for 11.5 h under argon atmosphere. Then the resulting solution was poured into a mixture of EtOAc (150 ml) and water (150 ml). The aqueous layer was back-extracted with EtOAc (100 ml). The combined organic layers were washed with water (2 × 100 ml) and brine (100 ml), dried over  $Na_2SO_4$  and evaporated under vacuum. The residue was subjected to a column chromatography on silica gel (eluent: EtOAc/Hexane = 40% → 50% → 70%) to yield 5.15 g (68%) of 4-(benzyloxy)-3-hydroxybenzaldehyde **6b**. For analytical purposes the product was recrystallized from hexane/ $CH_2Cl_2$  = 1:1 mixture (4 ml). White solid.  $R_f$  = 0.43 (EtOAc/Hexane = 40%).

<sup>1</sup>H NMR spectrum is concordant with the one reported in literature.<sup>7</sup>

---

<sup>7</sup> J. Jian, J. Fan, H. Yang, P. Lan, M. Li, P. Liu, H. Gao and P. Sun, *Journal of Natural Products*, **2018**, 81, 371-377.

### 3-(cyclopropylmethoxy)-4-(difluoromethoxy)benzaldehyde (**6a**)

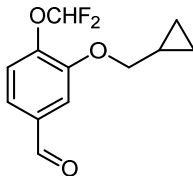

To a stirred solution of 4-(difluoromethoxy)-3-hydroxybenzaldehyde **5a** (1.225 g, 6.52 mmol) in dry THF (18 ml) in Schlenk flask under argon atmosphere was added  $K_2CO_3$  (1.785 g, 12.9 mmol) and the reaction mixture was cooled to 0°C. (Bromomethyl)cyclopropane (1.4 ml, 14.4 mmol) was added and the reaction mixture was gently refluxed under argon atmosphere for 5.5 h. Then (bromomethyl)cyclopropane (0.7 ml, 7.2 mmol) was added, the reaction mixture was refluxed for 5.5 h and then cooled to r.t. 2M solution of NaOH (70 ml) was added to the mixture and the resulting solution was poured to  $CH_2Cl_2$  (70 ml). The aqueous layer was back-extracted with  $CH_2Cl_2$  (3 × 35 ml). The combined organic layers were washed with brine (100 ml), dried over  $Na_2SO_4$  and evaporated under vacuum to yield 1.413 g (90%) of **6a**. White solid.  $R_f = 0.63$  (Hexane/EtOAc = 1:1).

$^1H$  NMR spectrum is concordant with the one reported in literature.<sup>8</sup>

### 4-(benzyloxy)-3-(cyclopropylmethoxy)benzaldehyde (**6b**)

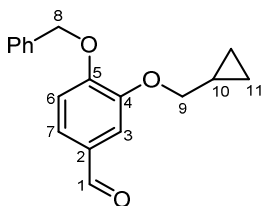

To a stirred solution of 4-(benzyloxy)-3-hydroxybenzaldehyde **5b** (5 g, 21.91 mmol) in DMF (40 ml) were added  $K_2CO_3$  (6.06 g, 43.81 mmol) and (bromomethyl)cyclopropane (4.25 ml, 43.81 mmol). The reaction mixture was stirred at 90°C for 2.5 h under argon atmosphere and then cooled to r.t. MTBE (100 ml) was added and the resulting mixture was poured into a saturated solution of  $NaHCO_3$  (100 ml). The organic layer were washed with water (100 ml) and brine (100 ml), dried over  $Na_2SO_4$  and evaporated under vacuum to yield 6.126 g (99%) of 4-(benzyloxy)-3-(cyclopropylmethoxy)benzaldehyde **6b**. White solid, m.p. = 48.5–50.0°C.  $R_f = 0.60$  (Hexane/EtOAc = 1:1).

$^1H$  NMR (300 MHz,  $CDCl_3$ )  $\delta$  9.82 (s, 1H, 1-CHO), 7.38 (s, 1H, 3-CH), 7.53 – 7.20 (m, 5H, Ph), 7.37 (d,  $J = 7.8$  Hz, 1H, 6-CH), 6.99 (d,  $J = 7.8$  Hz, 1H, 7-CH), 5.26 (s, 2H, 8- $CH_2$ ), 3.94 (d,  $J = 6.9$  Hz, 2H, 9- $CH_2$ ), 1.43 – 1.24 (m, 1H, 10-CH), 0.65 (m, 2H, 11- $CH_2$ ), 0.38 (m, 2H, 11- $CH_2$ ).

$^{13}C$  NMR (75 MHz,  $CDCl_3$ )  $\delta$  190.99 (1-C), 154.24 and 149.76 (4-C and 5-C), 136.49 (i-Ph), 130.52 (2-C), 128.73 (m-Ph), 128.14 (7-C), 127.12 (o-Ph), 126.51 (p-Ph), 113.38 (6-C), 111.98 (3-C), 74.10 (9-C), 71.01 (8-C), 10.31 (10-C), 3.46 (11-C).

HRMS (ESI):  $m/z$  calcd. for  $[C_{18}H_{19}O_3]^+$  283.1329, found 283.1319  $[M+H]^+$ .

<sup>8</sup> Y. Lin, P. Huang, S. Liu, L. Sima, L. Chen and D. Wang, *Research on Chemical Intermediates*, **2013**, *39*, 2107-2113.

**4-(3-(cyclopropylmethoxy)-4-(difluoromethoxy)phenyl)-6-ethoxy-3-methyl-5,6-dihydro-4H-1,2-oxazine 2-oxide (7a)**

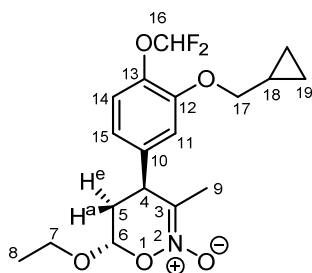

A solution of nitroalkene **4a** (0.574 g, 1.92 mmol) in dry  $\text{CH}_2\text{Cl}_2$  (12 ml) with  $\text{CaH}_2$  (ca. 0.05 g) was cooled to  $-94^\circ\text{C}$  (acetone/liquid nitrogen) in a Schlenk flask under argon atmosphere.  $\text{SnCl}_4$  (0.247 ml, 2.11 mmol) was added with intensive stirring. In 10 min a solution of ethyl vinyl ether (0.734 ml, 7.68 mmol) in dry  $\text{CH}_2\text{Cl}_2$  (8 ml) was added dropwise. The reaction mixture was intensively stirred at  $-94^\circ\text{C}$  for 20 min, then the resulting yellow-colored solution was poured into a mixture of EtOAc (200 ml) and saturated aqueous solution of  $\text{K}_2\text{CO}_3$  (200 ml). The aqueous layer was back-extracted with EtOAc (2  $\times$  100 ml). The combined organic layers were washed with water (100 ml) and brine (100 ml), dried over  $\text{Na}_2\text{SO}_4$  and evaporated under vacuum. The residue was subjected to a column chromatography on silica gel (eluent: Hexane/EtOAc = 10:1  $\rightarrow$  5:1  $\rightarrow$  1:1) to yield 0.299 g (42%) of nitronate. The fraction with initial nitroalkene was collected and recycled nitroalkene was subjected to the same procedure two more times to yield 0.168 g of nitronate **7a**. Overall yield of nitronate **7a** (after 3 cycles): 0.467 g (66%). White solid, m.p. =  $114\text{--}116^\circ\text{C}$  (recrystallized from Hexanes/ $\text{Et}_2\text{O}$  = 1:1).  $R_f$  = 0.20 (Hexane/EtOAc = 1:1).

$^1\text{H}$  NMR (300 MHz, COSY, HSQC,  $\text{CDCl}_3$ )  $\delta$  7.12 (d,  $J$  = 8.2 Hz, 1H, 14-CH), 6.75 (d,  $J$  = 8.2 Hz, 1H, 15-CH), 6.71 (s, 1H, 11-CH), 6.61 (t,  $J$  = 75.4 Hz, 1H, 16- $\text{CHF}_2$ ), 5.36 (s, 1H, 6-CH), 4.05 (dq,  $J$  = 14.5, 7.0 Hz, 1H, 7- $\text{CH}_2$ ), 3.85 – 3.83 (m, 1H, 4-CH), 3.83 (d,  $J$  = 6.5 Hz, 2H, 17- $\text{CH}_2$ ), 3.71 (dq,  $J$  = 14.5, 7.0 Hz, 1H, 7- $\text{CH}_2$ ), 2.25 (dd,  $J$  = 13.3, 7.7 Hz, 1H, 5- $\text{CH}_{\text{eq}}$ ), 2.07 (t,  $J$  = 13.3 Hz, 1H, 5- $\text{CH}_{\text{ax}}$ ), 1.86 (s, 3H, 9- $\text{CH}_3$ ), 1.26 (t,  $J$  = 7.0 Hz, 3H, 8- $\text{CH}_3$ ), 1.26 (m, 1H, 18-CH), 0.64 (m, 2H, 19- $\text{CH}_2$ ), 0.35 (m, 2H, 19- $\text{CH}_2$ ).

$^{13}\text{C}$  NMR (50 MHz, HSQC,  $\text{CDCl}_3$ )  $\delta$  151.31 (12-C), 139.83 (13-C), 138.89 (10-C), 123.40 (15-C), 122.84 (3-C), 120.81 (14-C), 116.16 (t,  $J$  = 260.5 Hz, 16-C), 113.56 (11-C), 101.02 (6-C), 74.17 (17-C), 65.18 (7-C), 40.59 (4-C), 34.49 (5-C), 17.67 (9-C), 15.13 (8-C), 10.18 (18-C), 3.31 (19-C).

$^{19}\text{F}$  NMR (282 MHz,  $\text{CDCl}_3$ )  $\delta$  -81.73 (d,  $J$  = 75.6 Hz).

HRMS (ESI):  $m/z$  calcd. for  $[\text{C}_{18}\text{H}_{24}\text{F}_2\text{NO}_5]^+$  372.1617, found 372.1629  $[\text{M}+\text{H}]^+$ .

**4-(4-(benzyloxy)-3-(cyclopropylmethoxy)phenyl)-6-ethoxy-3-methyl-5,6-dihydro-4H-1,2-oxazine 2-oxide (7b)**

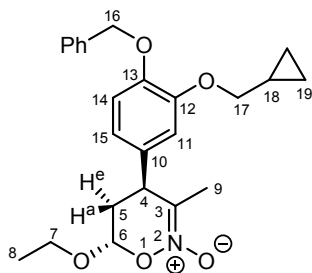

A solution of nitroalkene **4b** (0.350 g, 1.03 mmol) in dry  $\text{CH}_2\text{Cl}_2$  (7 ml) with  $\text{CaH}_2$  (0.05 g) was cooled to  $-94^\circ\text{C}$  (acetone/liquid nitrogen) in a Schlenk flask under argon atmosphere.  $\text{SnCl}_4$  (0.135 ml, 1.13 mmol) was added with intensive stirring. In 10 min a solution of ethyl vinyl ether (0.400 ml, 4.18 mmol) in dry  $\text{CH}_2\text{Cl}_2$  (4 ml) was added dropwise. The reaction mixture was intensively stirred at  $-80^\circ\text{C}$  for 50 min, then the resulting yellow-colored solution was poured into a mixture of EtOAc (50 ml) and saturated aqueous solution of  $\text{K}_2\text{CO}_3$  (50 ml). The aqueous layer was back-extracted with EtOAc (2  $\times$  30 ml). The combined organic layers were washed with water (50 ml) and brine (50 ml), dried over  $\text{Na}_2\text{SO}_4$  and evaporated under vacuum. The residue was subjected to a column chromatography on silica gel (eluent: Hexane/EtOAc = 10:1  $\rightarrow$  5:1  $\rightarrow$  1:1) to yield 0.382 g (93%) of nitronate **7b**. White solid, m.p. =  $78\text{--}82^\circ\text{C}$  (recrystallized from Hexanes/ $\text{Et}_2\text{O}$  = 1:1).  $R_f$  = 0.32 (Hexane/EtOAc = 1:1).

$^1\text{H}$  NMR (300 MHz,  $\text{CDCl}_3$ )  $\delta$  7.50 – 7.27 (m, 5H, Ph), 6.85 (d,  $J$  = 7.6 Hz, 1H, 14-CH), 6.68 (s, 1H, 11-CH), 6.67 (d,  $J$  = 7.6 Hz, 1H, 15-CH), 5.34 (dd, br,  $J$  = 2.6, 1.7 Hz, 1H, 6- $\text{CH}_{\text{eq}}$ ), 5.12 (s, 2H, 16- $\text{CH}_2$ ), 4.04 (dq,  $J$  = 14.3, 7.1 Hz, 1H, 7-CH), 3.84 (d,  $J$  = 6.6 Hz, 2H, 17- $\text{CH}_2$ ), 3.81 – 3.63 (m, 2H, 4-CH and 7-CH), 2.22 (ddd,  $J$  = 13.8, 7.6, 1.7 Hz, 1H, 5- $\text{CH}_{\text{eq}}$ ), 2.08 (ddd,  $J$  = 13.8, 11.0, 2.6 Hz, 1H, 5- $\text{CH}_{\text{ax}}$ ), 1.84 (s, 3H, 9- $\text{CH}_3$ ), 1.26 (t,  $J$  = 7.1 Hz, 3H, 8- $\text{CH}_3$ ), 1.37 – 1.16 (m, 1H, 18-CH), 0.62 (m, 2H, 19- $\text{CH}_2$ ), 0.34 (m, 2H, 19- $\text{CH}_2$ ).

$^{13}\text{C}$  NMR (75 MHz,  $\text{CDCl}_3$ )  $\delta$  149.91 and 148.39 (12-C and 13-C), 137.25 (i-Ph), 133.23 (10-C), 128.45 (m-Ph), 127.78 (15-C), 127.21 (o-Ph), 123.52 (3-C), 120.80 (p-Ph), 115.49 (14-C), 113.97 (11-C), 100.97 (6-C), 74.30 (17-C), 71.39 (16-C), 64.95 (7-C), 40.18 (4-C), 34.30 (5-C), 17.48 (9-C), 15.03 (8-C), 10.36 (18-C), 3.27 (19-C).

HRMS (ESI):  $m/z$  calcd. for  $[\text{C}_{24}\text{H}_{30}\text{NO}_5]^+$  412.2118, found 412.2114  $[\text{M}+\text{H}]^+$ .

**(4S,6S)-4-(3-(cyclopropylmethoxy)-4-(difluoromethoxy)phenyl)-3-methyl-6-(((1S,2S)-2-phenylcyclohexyl)oxy)-5,6-dihydro-4H-1,2-oxazine 2-oxide (7c)**

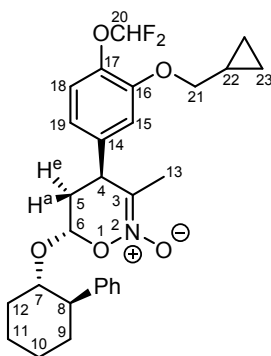

A mixture of nitroalkene **4a** (0.530 g, 1.77 mmol), (+)-(1R,2S)-*trans*-phenylcyclohexanol vinyl ether **8** (0.451 g, 2.22 mmol) and  $\text{CaH}_2$  (ca. 0.1 g) in dry  $\text{CH}_2\text{Cl}_2$  (40 ml) was cooled to  $-94^\circ\text{C}$  (acetone/liquid nitrogen) in a Schlenk flask under argon atmosphere.  $\text{SnCl}_4$  (0.210 ml, 1.77 mmol) was added with intensive stirring. The reaction mixture was intensively stirred at  $-94^\circ\text{C}$  for 1 h, then the resulting dark red solution was poured into a mixture of EtOAc (200 ml) and saturated aqueous solution of  $\text{K}_2\text{CO}_3$  (200 ml). The aqueous layer was back-extracted with EtOAc (2  $\times$  100 ml). The combined organic layers were washed with saturated aqueous solution of  $\text{K}_2\text{CO}_3$  (100 ml), water (100 ml) and brine (100 ml), dried over  $\text{Na}_2\text{SO}_4$ , filtered through Celite® and evaporated under vacuum. The residue was subjected to a column chromatography on silica gel (eluent: Hexane/EtOAc = 10:1  $\rightarrow$  5:1  $\rightarrow$  1:1) to yield 0.138 g (16%) of nitronate. The fraction with initial nitroalkene was collected and the recycled nitroalkene was subjected to the same procedure three more times to yield 0.168 g of nitronate **7a**. Overall yield of nitronate **7c** (after 4 cycles): 0.379 g (24%). Colorless oil.  $R_f = 0.38$  (Hexane/EtOAc = 1:1).

$^1\text{H}$  NMR (300 MHz, COSY, HSQC,  $\text{CDCl}_3$ )  $\delta$  7.38 – 7.08 (m, 5H, Ph), 7.03 (d,  $J = 8.1$  Hz, 1H, 18-CH), 6.57 (s, 1H, 15-CH), 6.56 (d,  $J = 8.1$  Hz, 1H, 19-CH), 6.55 (t,  $J = 75.5$  Hz, 1H, 20- $\text{CHF}_2$ ), 5.53 (s, 1H, 6-CH), 4.15 (ddd,  $J = 11.2, 11.2, 3.8$  Hz, 1H, 7- $\text{CH}_{\text{ax}}$ ), 3.77 (d,  $J = 6.8$  Hz, 2H, 21- $\text{CH}_2$ ), 3.15 (dd,  $J = 11.4, 7.5$  Hz, 1H, 4-CH), 2.58 (ddd,  $J = 11.2, 11.2, 2.7$  Hz, 1H, 8- $\text{CH}_{\text{ax}}$ ), 2.34 (dd,  $J = 11.6, 2.3$  Hz, 1H, 12-CH), 2.05 – 1.92 (m, 2H, 5- $\text{CH}_2$ ), 1.92 – 1.84 (m, 3H, 9- $\text{CH}_2$  and 11-CH), 1.82 – 1.71 (m, 1H, 10-CH), 1.65 – 1.47 (m, 1H, 11-CH), 1.48 – 1.36 (m, 1H, 10-CH), 1.27 (s, 3H, 13- $\text{CH}_3$ ), 1.33 – 1.15 (m, 2H, 12-CH and 22-CH), 0.62 (m, 2H, 23- $\text{CH}_2$ ), 0.32 (m, 2H, 23- $\text{CH}_2$ ).

$^{13}\text{C}$  NMR (75 MHz, HSQC,  $\text{CDCl}_3$ )  $\delta$  151.08 (16-C), 144.23 (i-Ph), 139.52 (17-C), 138.78 (14-C), 128.31 and 127.60 (o-Ph and m-Ph), 126.14 (p-Ph), 123.12 (19-C), 122.31 (3-C), 120.84 (18-C), 116.12 (t,  $J = 259.9$  Hz, 20-C), 113.47 (15-C), 95.01 (6-C), 76.27 (7-C), 74.07 (21-C), 50.98 (8-C), 39.84 (4-C), 34.14 (11-C), 33.99 (5-C), 30.12 (12-C), 26.10 (10-C), 24.51 (9-C), 17.22 (13-C), 10.12 (22-C), 3.22 (23-C).

$^{19}\text{F}$  NMR (282 MHz,  $\text{CDCl}_3$ )  $\delta$  -82.50 (d,  $J = 75.4$  Hz).

HRMS (ESI):  $m/z$  calcd. for  $[\text{C}_{28}\text{H}_{34}\text{F}_2\text{NO}_5]^+$  502.2400, found 502.2398  $[\text{M}+\text{H}]^+$ .

Optical rotation:  $[\alpha]_D^{20} = +206^\circ$  ( $\text{CHCl}_3$ ,  $C = 1$  g/100 ml).

HPLC: e.e. = 96% (RT: 9.6 min; Column: CHIRALPAK IA-3; Solvent: Hexane/*i*-PrOH = 95:5; Temperature:  $40^\circ\text{C}$ ; Flow rate: 1 ml/min).

**4-(3-(cyclopropylmethoxy)-4-(difluoromethoxy)phenyl)-6-ethoxy-3-methylene-2-((trimethylsilyl)oxy)-1,2-oxazinane (9a)**

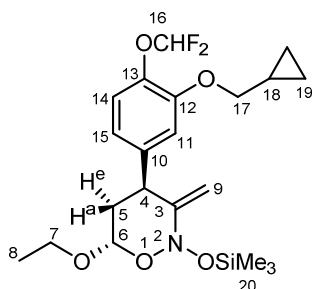

To a solution of nitronate **7a** (0.106 g, 0.286 mmol) in dry  $\text{CH}_2\text{Cl}_2$  (1.5 ml) in Schlenk flask triethylamine (0.060 ml, 0.429 mmol) was added with intensive stirring under argon atmosphere. The reaction mixture was cooled to  $-50^\circ\text{C}$  and  $\text{Me}_3\text{SiBr}$  (0.053 ml, 0.400 mmol) was added. The mixture was intensively stirred for 30 min at  $-50^\circ\text{C}$  and then kept for 20 h at  $-20^\circ\text{C}$  without stirring. The resulting solution was poured into a mixture of hexane (100 ml) and 0.25M aqueous solution of  $\text{NaHSO}_4$  (100 ml). The aqueous layer was back-extracted with hexane ( $2 \times 30$  ml). The combined organic layers were washed with water (50 ml) and brine (50 ml), dried over  $\text{Na}_2\text{SO}_4$  and evaporated under vacuum to yield 0.125 g (99%) of enamine silyl ether **9a**. Colorless oil. The product was used on the next step without additional purification.

$^1\text{H}$  NMR (300 MHz, COSY, HSQC,  $\text{CDCl}_3$ )  $\delta$  7.08 (d,  $J = 7.6$  Hz, 1H, 14-CH), 6.90 (d,  $J = 1.4$  Hz, 1H, 11-CH), 6.86 (dd,  $J = 7.6, 1.4$  Hz, 1H, 15-CH), 6.59 (t,  $J = 75.6$  Hz, 1H, 16- $\text{CHF}_2$ ), 5.04 (dd,  $J = 5.4, 4.5$  Hz, 1H, 6-CH), 4.96 (s, 1H, 9-CH), 4.10 (s, 1H, 9-CH), 4.04 – 3.88 (m, 2H, 4-CH and 7-CH), 3.84 (d,  $J = 6.9$  Hz, 2H, 17- $\text{CH}_2$ ), 3.54 (dq,  $J = 14.5, 7.0$  Hz, 1H, 7-CH), 2.20 (ddd,  $J = 13.2, 9.1, 4.5$  Hz, 1H, 5- $\text{CH}_{\text{eq}}$ ), 2.08 (dt,  $J = 13.2, 5.4$  Hz, 1H, 5- $\text{CH}_{\text{ax}}$ ), 1.23 (t,  $J = 7.0$  Hz, 3H, 8- $\text{CH}_3$ ), 1.31 – 1.12 (m, 1H, 18-CH), 0.61 (m, 2H, 19- $\text{CH}_2$ ), 0.32 (m, 2H, 19- $\text{CH}_2$ ), 0.24 (s, 9H, 20- $\text{Si}(\text{CH}_3)_4$ ).

$^{13}\text{C}$  NMR (75 MHz, HSQC,  $\text{CDCl}_3$ )  $\delta$  158.0 (br, 3-C), 150.40 (12-C), 139.79 and 139.41 (10-C and 13-C), 122.53 (15-C), 121.22 (14-C), 116.39 (t,  $J = 259.2$  Hz, 16-C), 115.20 (11-C), 99.27 (6-C), 97.94 (9-C), 74.02 (17-C), 64.15 (7-C), 40.86 (4-C), 36.48 (5-C), 15.04 (8-C), 10.25 (18-C), 3.18 (19-C), -0.78 (20-C).

$^{19}\text{F}$  NMR (188 MHz,  $\text{CDCl}_3$ )  $\delta$  -81.32 (d,  $J = 75.7$  Hz).

$^{29}\text{Si}$  NMR (40 MHz,  $\text{CDCl}_3$ )  $\delta$  26.55 (s).

HRMS (ESI):  $m/z$  calcd. for  $[\text{C}_{21}\text{H}_{32}\text{F}_2\text{NO}_5\text{Si}]^+$  444.2012, found 444.2005  $[\text{M}+\text{H}]^+$ .

**4-(4-(benzyloxy)-3-(cyclopropylmethoxy)phenyl)-6-ethoxy-3-methylene-2-((trimethylsilyl)oxy)-1,2-oxazinane (9b)**

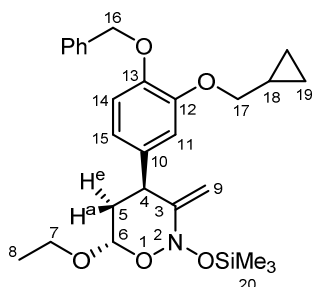

To a solution of nitronate **7b** (3.00 g, 0.286 mmol) in dry  $\text{CH}_2\text{Cl}_2$  (28 ml) in Schlenk flask triethylamine (1.52 ml, 10.9 mmol) was added with intensive stirring under argon atmosphere. The reaction mixture was cooled to  $-50^\circ\text{C}$  and  $\text{Me}_3\text{SiBr}$  (1.35 ml, 10.21 mmol) was added. The mixture was intensively stirred for 80 min at  $-50^\circ\text{C}$  and then kept for 20 h at  $-20^\circ\text{C}$  without stirring. The resulting solution was poured into a mixture of hexane (200 ml) and 0.25M aqueous solution of  $\text{NaHSO}_4$  (200 ml). The aqueous layer was back-extracted with hexane ( $2 \times 100$  ml). The combined organic layers were washed with water (100 ml) and brine (100 ml), dried over  $\text{Na}_2\text{SO}_4$  and evaporated under vacuum to yield 0.125 g (99%) of enamine silyl ether **9b**. Colorless oil.

$^1\text{H}$  NMR (300 MHz,  $\text{CDCl}_3$ )  $\delta$  7.50 – 7.29 (m, 5H, Ph), 6.88 (s, 1H, 11-CH), 6.87 (d,  $J = 8.2$  Hz, 1H, 14-CH), 6.79 (d,  $J = 8.2$  Hz, 1H, 15-CH), 5.14 (s, 2H, 16- $\text{CH}_2$ ), 5.07 (t,  $J = 4.7$  Hz, 1H, 6- $\text{CH}_{\text{eq}}$ ), 4.93 (s, br, 1H, 9-CH), 4.07 (s, br, 1H, 9-CH), 4.03 – 3.89 (m, 2H, 4-CH and 7-CH), 3.87 (d,  $J = 6.9$  Hz, 2H, 17- $\text{CH}_2$ ), 3.57 (dq,  $J = 9.4, 7.0$  Hz, 1H, 7-CH), 2.22 (ddd,  $J = 13.4, 9.6, 4.6$  Hz, 1H, 5- $\text{CH}_{\text{eq}}$ ), 2.07 (dt,  $J = 13.4, 5.5$  Hz, 1H, 5- $\text{CH}_{\text{ax}}$ ), 1.36 – 1.20 (m, 1H, 18-CH), 1.25 (t,  $J = 7.0$  Hz, 3H, 8- $\text{CH}_3$ ), 0.61 (m, 2H, 19- $\text{CH}_2$ ), 0.34 (m, 2H, 19- $\text{CH}_2$ ), 0.25 (s,  $J = 3.2$  Hz, 9H, 20- $\text{Si}(\text{CH}_3)_3$ ).

$^{13}\text{C}$  NMR (75 MHz, JMOD,  $\text{CDCl}_3$ )  $\delta$  149.44 and 148.08 (12-C and 13-C), 137.73 and 136.55 (i-Ph and 10-C), 128.55 (m-Ph), 127.83 (15-C), 127.43 (o-Ph), 121.41 (p-Ph), 115.98 (14-C), 115.51 (11-C), 99.41 (6-C), 83.31 (9-C), 74.52 (17-C), 71.71 (16-C), 64.22 (7-C), 40.65 (4-C), 36.75 (5-C), 15.15 (8-C), 10.65 (18-C), 3.36 (19-C), -0.65 (20-C) (9- $\text{CH}_2$  not observed).

HRMS (ESI):  $m/z$  calcd. for  $[\text{C}_{27}\text{H}_{39}\text{NO}_5\text{Si}]$  484.2514, found 484.2511  $[\text{M}+\text{H}]^+$ .

**(4S,6S)-4-(3-(cyclopropylmethoxy)-4-(difluoromethoxy)phenyl)-3-methylene-6-(((1S,2R)-2-phenylcyclohexyl)oxy)-2-((trimethylsilyl)oxy)-1,2-oxazinane (9c)**

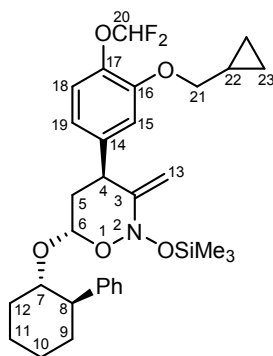

To a stirred solution of nitronate **7c** (0.362 g, 0.724 mmol) in dry  $\text{CH}_2\text{Cl}_2$  (1.2 ml) in Schlenk flask triethylamine (0.120 ml, 0.870 mmol) was added under argon atmosphere. The reaction mixture was cooled to  $-78^\circ\text{C}$  and  $\text{Me}_3\text{SiBr}$  (0.105 ml, 0.796 mmol) was added. The mixture was intensively stirred for 30 min at  $-78^\circ\text{C}$  and then kept for 45 h at this temperature without stirring. The resulting solution was poured into a mixture of hexane (100 ml) and 0.25M aqueous solution of  $\text{NaHSO}_4$  (100 ml). The aqueous layer was back-extracted with hexane ( $2 \times 50$  ml). The combined organic layers were washed with water ( $2 \times 50$  ml) and brine (50 ml), dried over  $\text{Na}_2\text{SO}_4$  and evaporated under vacuum to yield 0.409 g (99%) of enamine silyl ether **9c**. Yellow oil. The product was used on the next step without additional purification.

$^1\text{H}$  NMR (300 MHz, COSY, HSQC,  $\text{CDCl}_3$ )  $\delta$  7.39 – 7.14 (m, 5H, Ph), 7.07 (d,  $J = 7.6$  Hz, 1H, 18-CH), 6.70 (s, 1H, 15-CH), 6.69 (d,  $J = 7.6$  Hz, 1H, 19-CH), 6.60 (t,  $J = 75.7$  Hz, 1H, 20- $\text{CHF}_2$ ), 5.38 (t, br,  $J = 4.4$  Hz, 1H, 6- $\text{CH}_{\text{eq}}$ ), 4.77 (s, br, 1H, 13-CH), 4.06 (ddd,  $J = 10.6, 10.6, 3.5$  Hz, 1H, 7- $\text{CH}_{\text{ax}}$ ), 3.86 (s, br, 1H, 13-CH), 3.82 (d,  $J = 7.0$  Hz, 2H, 21- $\text{CH}_2$ ), 3.51 (s, br, 1H, 4-CH), 2.62 (ddd,  $J = 10.6, 10.6, 3.2$  Hz, 1H, 8- $\text{CH}_{\text{ax}}$ ), 2.35 (d,  $J = 10.0$  Hz, 1H, 12-CH), 2.06 (ddd,  $J = 10.5, 10.5, 2.5$  Hz, 1H, 5- $\text{CH}_{\text{ax}}$ ), 2.00 – 1.67 (m, 5H, 5- $\text{CH}_{\text{eq}}$ , 9- $\text{CH}_2$ , 10-CH and 11-CH), 1.67 – 1.17 (m, 4H, 10-CH, 11-CH, 12-CH, 22-CH), 0.64 (m, 2H, 23- $\text{CH}_2$ ), 0.35 (m, 2H, 23- $\text{CH}_2$ ), 0.28 (s, 9H, 24- $\text{Si}(\text{CH}_3)_3$ ).

$^{13}\text{C}$  NMR (75 MHz, HSQC,  $\text{CDCl}_3$ )  $\delta$  158.0 (br, 13-C), 150.35 (16-C), 144.33, 139.59 and 139.24 (i-Ph, 14-C and 17-C), 128.15 and 128.00 (o-Ph and m-Ph), 125.93 (p-Ph), 122.55 (19-C), 121.33 (18-C), 116.41 (t,  $J = 259.1$  Hz, 20-C), 115.32 (15-C), 97.63 (13-C), 93.88 (6-C), 76.26 (7-C), 74.03 (21-C), 50.38 (8-C), 40.44 (4-C), 36.86 (11-C), 34.55 (5-C), 30.70 (12-C), 26.25 (10-C), 24.88 (9-C), 10.30 (22-C), 3.29 (23-C), -0.41 (24-C).

$^{19}\text{F}$  NMR (282 MHz,  $\text{CDCl}_3$ )  $\delta$  -82.32 (d,  $J = 75.7$  Hz).

$^{29}\text{Si}$  NMR (40 MHz,  $\text{CDCl}_3$ )  $\delta$  26.07 (s).

HRMS (ESI):  $m/z$  calcd. for  $[\text{C}_{31}\text{H}_{42}\text{F}_2\text{NO}_5\text{Si}]$  574.2795, found 574.2791  $[\text{M}+\text{H}]^+$ .



**4-(3-(cyclopropylmethoxy)-4-(difluoromethoxy)phenyl)-6-ethoxy-5,6-dihydro-4H-1,2-oxazin-3-yl)methyl nitrate (10a)**

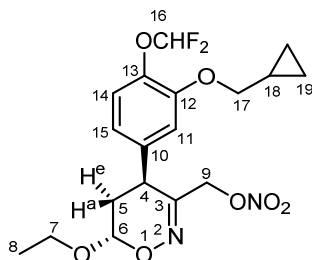

To a stirred solution of enamine silyl ether **9a** (0.469 g, 1.06 mmol) in  $\text{CH}_2\text{Cl}_2$  (2 ml) was added a solution of chromium (III) nitrate nonahydrate (0.849 g, 2.12 mmol) in THF (10 ml). The reaction mixture was intensively stirred at r.t. for 2 h, then poured into a mixture of EtOAc (50 ml) and 0.25M aqueous solution of  $\text{NaHSO}_4$  (50 ml). The aqueous layer was back-extracted with EtOAc (3  $\times$  30 ml). The combined organic layers were washed with water (50 ml) and brine (50 ml), dried over  $\text{Na}_2\text{SO}_4$  and evaporated under vacuum. The residue was subjected to a column chromatography on silica gel (eluent: Hexane/EtOAc = 1:0  $\rightarrow$  20:1  $\rightarrow$  10:1  $\rightarrow$  5:1  $\rightarrow$  3:1) to yield 0.193 g (44 %) of nitrate **10a**. White solid, m.p. = 62–64°C.  $R_f$  = 0.66 (Hexane/EtOAc = 1:1).

$^1\text{H}$  NMR (300 MHz, COSY, HSQC,  $\text{CDCl}_3$ )  $\delta$  7.14 (d,  $J$  = 7.7 Hz, 1H, 14-CH), 6.79 (s, 1H, 11-CH), 6.78 (d,  $J$  = 7.7 Hz, 1H, 15-CH), 6.61 (t,  $J$  = 75.4 Hz, 1H, 16- $\text{CHF}_2$ ), 5.19 (t,  $J$  = 1.7 Hz, 1H, 6- $\text{CH}_{\text{eq}}$ ), 4.83 (d,  $J$  = 13.0 Hz, 1H, 9-CH), 4.73 (d,  $J$  = 13.0 Hz, 1H, 9-CH), 4.16 – 3.74 (m, 1H, 7-CH), 3.85 (d,  $J$  = 7.1 Hz, 2H, 17-CH), 3.76 – 3.47 (m, 2H, 4-CH and 7-CH), 2.29 (ddd,  $J$  = 13.0, 7.9, 1.7 Hz, 1H, 5- $\text{CH}_{\text{eq}}$ ), 2.08 (ddd,  $J$  = 13.0, 13.0, 1.2 Hz, 1H, 5- $\text{CH}_{\text{ax}}$ ), 1.26 – 1.24 (m, 1H, 18-CH), 1.23 (t,  $J$  = 7.1 Hz, 3H, 8- $\text{CH}_3$ ), 0.65 (m, 2H, 19- $\text{CH}_2$ ), 0.36 (m, 2H, 19- $\text{CH}_2$ ).

$^{13}\text{C}$  NMR (75 MHz, HSQC,  $\text{CDCl}_3$ )  $\delta$  153.76 (3-C), 151.43 (12-C), 137.13 (10-C), 123.61 (15-C), 120.93 (14-C), 116.24 (t,  $J$  = 260.2 Hz, 16-C), 114.65 (11-C), 96.10 (6-C), 74.29 (17-C), 71.52 (9-C), 64.20 (7-C), 34.89 (4-C), 32.57 (5-C), 15.05 (8-C), 10.25 (18-C), 3.30 (19-C) (13-C not observed).

$^{19}\text{F}$  NMR (282 MHz,  $\text{CDCl}_3$ )  $\delta$  -82.52 (d,  $J$  = 75.3 Hz).

FT-IR (KBr,  $\text{cm}^{-1}$ , characteristic O- $\text{NO}_2$  bands): 1632, 1286, 847, 758.

HRMS (ESI):  $m/z$  calcd. for  $[\text{C}_{18}\text{H}_{23}\text{F}_2\text{N}_2\text{O}_7]^+$  417.1468, found 417.1461  $[\text{M}+\text{H}]^+$ .

**(4-(4-(benzyloxy)-3-(cyclopropylmethoxy)phenyl)-6-ethoxy-5,6-dihydro-4H-1,2-oxazin-3-yl)methyl nitrate (10b)**

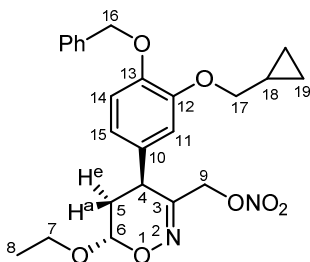

The crude enamine silyl ether **9b** was dissolved in  $\text{CH}_2\text{Cl}_2$  (14 ml) was added a solution of chromium (III) nitrate nonahydrate (5.63 g, 14.06 mmol) in THF (28 ml). The reaction mixture was intensively stirred at r.t. for 2.5 h, then poured into a mixture of EtOAc (100 ml) and 0.25M aqueous solution of  $\text{NaHSO}_4$  (100 ml). The aqueous layer was back-extracted with EtOAc (2  $\times$  100 ml). The combined organic layers were washed with water (100 ml) and brine (100 ml), dried over  $\text{Na}_2\text{SO}_4$  and evaporated under vacuum. The residue was subjected to a column chromatography on silica gel (eluent: Hexane/EtOAc = 5:1) to yield 1.72 g (53 %) of nitrate **10b**. Yellow oil.  $R_f$  = 0.74 (Hexane/EtOAc = 1:1).

$^1\text{H}$  NMR (300 MHz,  $\text{CDCl}_3$ )  $\delta$  7.50 – 7.27 (m, 5H, Ph), 6.88 (d,  $J$  = 9.3 Hz, 1H, 15-CH), 6.73 (s, 1H, 11-CH), 6.71 (d,  $J$  = 9.3 Hz, 1H, 14-CH), 5.19 (s, 1H, 6- $\text{CH}_{\text{eq}}$ ), 5.14 (s, 2H, 16- $\text{CH}_2$ ), 4.79 (d,  $J$  = 13.0 Hz, 1H, 9-CH), 4.72 (d,  $J$  = 13.0 Hz, 1H, 9-CH), 3.96 – 3.81 (m, 1H, 7-CH), 3.86 (d,  $J$  = 6.8 Hz, 2H, 17- $\text{CH}_2$ ), 3.70 – 3.54 (m, 2H, 4-CH and 7-CH), 2.27 (ddd,  $J$  = 13.1, 7.7, 2.2 Hz, 1H, 5- $\text{CH}_{\text{eq}}$ ), 2.09 (td,  $J$  = 13.1, 1.5 Hz, 1H, 5- $\text{CH}_{\text{ax}}$ ), 1.37 – 1.27 (m, 1H, 18-CH), 1.23 (t,  $J$  = 7.0 Hz, 3H, 8- $\text{CH}_3$ ), 0.64 (m, 2H, 19- $\text{CH}_2$ ), 0.36 (m, 2H, 19- $\text{CH}_2$ ).

$^{13}\text{C}$  NMR (75 MHz, JMOD,  $\text{CDCl}_3$ )  $\delta$  154.35 (3-C), 150.14 and 148.68 (12-C and 13-C), 137.31 and 131.42 (i-Ph and 10-C), 128.61 (m-Ph), 127.96 (15-C), 127.37 (o-Ph), 121.09 (p-Ph), 115.94 (14-C), 114.55 (11-C), 96.24 (6-C), 74.42 (17-C), 71.55 (9-C and 16-C), 64.12 (7-C), 34.49 (4-C), 32.37 (5-C), 15.10 (8-C), 10.49 (18-C), 3.42 (19-C).

HRMS (ESI):  $m/z$  calcd. for  $[\text{C}_{24}\text{H}_{29}\text{N}_2\text{O}_7]^+$  457.1969, found 457.1962  $[\text{M}+\text{H}]^+$ .

**((4S,6S)-4-(3-(cyclopropylmethoxy)-4-(difluoromethoxy)phenyl)-6-(((1S,2R)-2-phenylcyclohexyl)oxy)-5,6-dihydro-4H-1,2-oxazin-3-yl)methyl nitrate (10c)**

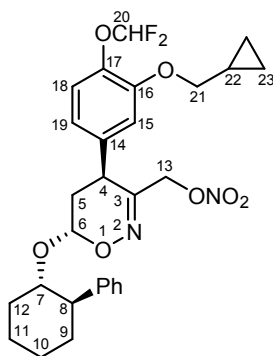

To a stirred solution of enamine silyl ether **9c** (0.409 g, 0.715 mmol) in  $\text{CH}_2\text{Cl}_2$  (1.5 ml) was added a solution of chromium (III) nitrate nonahydrate (0.573 g, 1.430 mmol) in THF (7 ml). The reaction mixture was intensively stirred at r.t. for 2 h, then poured into a mixture of EtOAc (80 ml) and 0.25M aqueous solution of  $\text{NaHSO}_4$  (80 ml). The aqueous layer was back-extracted with EtOAc ( $2 \times 50$  ml). The combined organic layers were washed with water (50 ml) and brine (50 ml), dried over  $\text{Na}_2\text{SO}_4$  and evaporated under vacuum. The residue was subjected to a column chromatography on silica gel (eluent: Hexane/EtOAc = 20:1  $\rightarrow$  10:1  $\rightarrow$  5:1) to yield 0.168 g (43 %) of nitrate **10c**. Yellow oil.  $R_f$  = 0.73 (Hexane/EtOAc = 1:1). Mixture of diastereomers (ratio 4,6-*trans*/4,6-*cis* = 4.5 : 1).

Major isomer (4,6-*trans*):

$^1\text{H}$  NMR (300 MHz, COSY,  $\text{CDCl}_3$ )  $\delta$  7.41 – 7.11 (m, 5H, Ph), 7.08 (d,  $J$  = 6.5 Hz, 1H, 18-CH), 6.60 (s, 1H, 15-CH), 6.60 (d,  $J$  = 6.5 Hz, 1H, 19-CH), 6.59 (t,  $J$  = 75.4 Hz, 1H, 20- $\text{CHF}_2$ ), 5.39 (s, 1H, 6- $\text{CH}_{\text{eq}}$ ), 4.33 (d,  $J$  = 13.3 Hz, 1H, 13-CH), 4.20 (d,  $J$  = 13.3 Hz, 1H, 13-CH), 3.96 (ddd,  $J$  = 11.2, 11.2, 3.9 Hz, 1H, 7- $\text{CH}_{\text{ax}}$ ), 3.81 (d,  $J$  = 6.9 Hz, 2H, 21- $\text{CH}_2$ ), 2.94 (dd,  $J$  = 12.5, 7.3 Hz, 1H, 4- $\text{CH}_{\text{ax}}$ ), 2.58 (ddd,  $J$  = 11.2, 11.2, 3.3 Hz, 1H, 8- $\text{CH}_{\text{ax}}$ ), 2.42 (ddd,  $J$  = 26.5, 13.1, 2.9 Hz, 1H, 12-CH), 2.21 – 1.71 (m, 6H, 5- $\text{CH}_2$ , 9- $\text{CH}_2$ , 10-CH and 11-CH), 1.67 – 1.19 (m, 4H, 10-CH, 11-CH, 12-CH and 22-CH), 0.66 (m, 2H, 23- $\text{CH}_2$ ), 0.36 (m, 2H, 23- $\text{CH}_2$ ).

$^{13}\text{C}$  NMR (50 MHz,  $\text{CDCl}_3$ )  $\delta$  152.42 (3-C), 151.04 (16-C), 144.55 (i-Ph), 139.86 (t,  $J$  = 3.7 Hz, 17-C), 136.71 (14-C), 128.16 and 127.98 (o-Ph and m-Ph), 125.97 (p-Ph), 123.24 (19-C), 121.02 (18-C), 116.16 (t,  $J$  = 260.0 Hz, 20-C), 114.00 (15-C), 90.90 (6-C), 76.45 (7-C), 74.01 (21-C), 70.64 (13-C), 50.93 (8-C), 34.54 (4-C), 34.08 (11-C), 34.02 (5-C), 30.56 (12-C), 26.15 (10-C), 24.69 (9-C), 10.13 (22-C), 3.29 (23-C).

$^{14}\text{N}$  NMR (22 MHz,  $\text{CDCl}_3$ )  $\delta$  -45.55.

$^{19}\text{F}$  NMR (188 MHz,  $\text{CDCl}_3$ )  $\delta$  -81.49 (d,  $J$  = 75.4 Hz).

HRMS (ESI):  $m/z$  calcd. for  $[\text{C}_{28}\text{H}_{33}\text{F}_2\text{N}_2\text{O}_7]^+$  547.2250, found 547.2245  $[\text{M}+\text{H}]^+$ .

Minor isomer (4,6-*cis*):

$^1\text{H}$  NMR (300 MHz, characteristic signals, COSY,  $\text{CDCl}_3$ )  $\delta$  6.64 (t,  $J$  = 75.4 Hz, 1H, 20- $\text{CHF}_2$ ), 4.86 (d,  $J$  = 13.0 Hz, 1H, 13-CH), 4.71 (d,  $J$  = 13.0 Hz, 1H, 13-CH), 3.87 (d,  $J$  = 7.0 Hz, 2H, 21- $\text{CH}_2$ ), 3.25 (dd,  $J$  = 9.1, 6.1 Hz, 1H, 4-CH).

**3-(azidomethyl)-4-(3-(cyclopropylmethoxy)-4-(difluoromethoxy)phenyl)-6-ethoxy-5,6-dihydro-4H-1,2-oxazine (11a)**

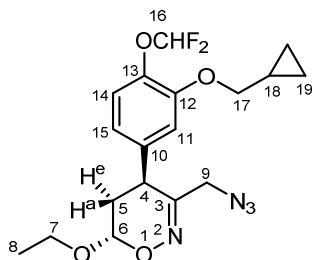

To a stirred solution of nitrate **10a** (0.193 g, 0.465 mmol) in DMF (5 ml) was added sodium azide (151 mg, 2.33 mmol). The mixture was intensively stirred at 60°C for 5 h, then poured into a mixture of Et<sub>2</sub>O (50 ml) and water (50 ml). The aqueous layer was back-extracted with Et<sub>2</sub>O (2 × 30 ml). The combined organic layers were washed with brine (50 ml), dried over Na<sub>2</sub>SO<sub>4</sub> and evaporated under vacuum. The residue was subjected to a column chromatography on silica gel (eluent: Hexane/EtOAc = 20:1 → 10:1 → 5:1) to yield 0.178 g (97%) of azide **11a**. Yellow oil. R<sub>f</sub> = 0.69 (Hexane/EtOAc = 1:1).

<sup>1</sup>H NMR (300 MHz, COSY, HSQC, CDCl<sub>3</sub>) δ 7.14 (d, J = 7.4 Hz, 1H, 14-CH), 6.77 (d, J = 7.4 Hz, 1H, 15-CH), 6.77 (s, 1H, 11-CH), 6.61 (t, J = 75.4 Hz, 1H, 16-CHF<sub>2</sub>), 5.18 (dd, J = 2.5, 1.9 Hz, 1H, 6-CH<sub>eq</sub>), 3.93 – 3.85 (m, 1H, 7-CH), 3.84 (d, J = 6.6 Hz, 2H, 17-CH<sub>2</sub>), 3.83 (d, J = 13.6 Hz, 1H, 9-CH), 3.74 (dd, J = 12.1, 7.8 Hz, 1H, 4-CH), 3.64 (dq, J = 14.1, 7.0 Hz, 1H, 7-CH), 3.44 (d, J = 13.6 Hz, 1H, 9-CH), 2.30 (ddd, J = 13.4, 7.8, 1.9 Hz, 1H, 5-CH<sub>eq</sub>), 2.10 (ddd, J = 13.4, 12.1, 2.5 Hz, 1H, 5-CH<sub>ax</sub>), 1.39 – 1.06 (m, 1H, 18-CH), 1.24 (t, J = 7.0 Hz, 3H, 8-CH<sub>3</sub>), 0.64 (m, 2H, 19-CH<sub>2</sub>), 0.35 (m, 2H, 19-CH<sub>2</sub>).

<sup>13</sup>C NMR (50 MHz, HSQC, CDCl<sub>3</sub>) δ 156.62 (3-C), 151.23 (12-C), 137.72 and 136.80 (10-C and 13-C), 123.54 (15-C), 120.88 (14-C), 116.23 (t, J = 255.6 Hz, 16-C), 114.26 (11-C), 95.86 (6-C), 74.09 (17-C), 64.06 (7-C), 52.61 (9-C), 34.69 (4-C), 32.79 (5-C), 15.08 (8-C), 10.18 (18-C), 3.32 (19-C).

<sup>19</sup>F NMR (188 MHz, CDCl<sub>3</sub>) δ -81.50 (d, J = 75.3 Hz).

HRMS (ESI): m/z calcd. for [C<sub>18</sub>H<sub>23</sub>F<sub>2</sub>N<sub>4</sub>O<sub>4</sub>]<sup>+</sup> 397.1682, found 397.1673 [M+H]<sup>+</sup>.

**3-(azidomethyl)-4-(4-(benzyloxy)-3-(cyclopropylmethoxy)phenyl)-6-ethoxy-5,6-dihydro-4H-1,2-oxazine (11b)**

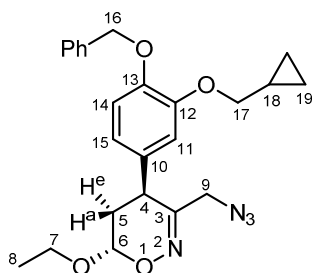

To a stirred solution of nitrate **10b** (1.69 g, 3.70 mmol) in DMF (40 ml) was added sodium azide (1.20 g, 18.51 mmol). The mixture was intensively stirred at 60°C for 6 h, then poured into a mixture of MTBE (200 ml) and water (200 ml). The aqueous layer was back-extracted with MTBE (2 × 100 ml). The combined organic layers were washed with brine (200 ml), dried over Na<sub>2</sub>SO<sub>4</sub> and evaporated under vacuum. The residue was subjected to a column chromatography on silica gel (eluent: Hexane/EtOAc = 5:1) to yield 1.538 g (95%) of azide **11b**. Yellow oil. R<sub>f</sub> = 0.69 (Hexane/EtOAc = 1:1).

<sup>1</sup>H NMR (300 MHz, CDCl<sub>3</sub>) δ 7.50 – 7.27 (m, 5H, Ph), 6.88 (d, J = 8.4 Hz, 1H, 15-CH), 6.73 (s, 1H, 11-CH), 6.71 (d, J = 8.4 Hz, 1H, 14-CH), 5.17 (t, J = 2.0 Hz, 1H, 6-CH<sub>eq</sub>), 5.14 (s, 2H, 16-CH<sub>2</sub>), 3.97 – 3.80 (m, 1H, 7-CH), 3.86 (d, J = 6.8 Hz, 2H, 17-CH<sub>2</sub>), 3.80 (d, J = 13.4 Hz, 1H, 9-CH), 3.74 – 3.56 (m, 2H, 4-CH and 7-CH), 3.45 (d, J = 13.4 Hz, 1H, 9-CH), 2.29 (ddd, J = 13.5, 7.8, 2.1 Hz, 1H, 5-CH<sub>eq</sub>), 2.11 (td, J = 13.5, 2.6 Hz, 1H, 5-CH<sub>ax</sub>), 1.37 – 1.17 (m, 1H, 18-CH), 1.25 (t, J = 7.1 Hz, 3H, 8-CH<sub>3</sub>), 0.63 (m, 2H, 19-CH<sub>2</sub>), 0.35 (m, 2H, 19-CH<sub>2</sub>).

<sup>13</sup>C NMR (75 MHz, JMOD, CDCl<sub>3</sub>) δ 157.22 (3-C), 150.06 and 148.59 (12-C and 13-C), 137.42 and 132.21 (i-Ph and 10-C), 128.59 (m-Ph), 127.92 (15-C), 127.37 (o-Ph), 121.19 (p-Ph), 115.94 (14-C), 114.72 (11-C), 96.05 (6-C), 74.41 (17-C), 71.59 (16-C), 63.98 (9-C), 52.61 (7-C), 34.51 (4-C), 32.84 (5-C), 15.10 (8-C), 10.52 (18-C), 3.39 (19-C).

HRMS (ESI): m/z calcd. for [C<sub>24</sub>H<sub>29</sub>N<sub>4</sub>O<sub>4</sub>]<sup>+</sup> 437.2183, found 437.2178 [M+H]<sup>+</sup>.

**(4S,6S)-3-(azidomethyl)-4-(3-(cyclopropylmethoxy)-4-(difluoromethoxy)phenyl)-6-(((1S,2R)-2-phenylcyclohexyl)oxy)-5,6-dihydro-4H-1,2-oxazine (11c)**

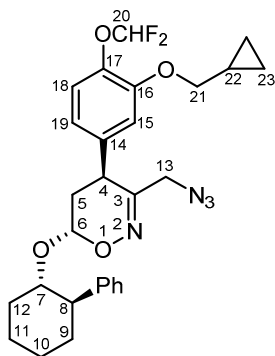

To a stirred solution of nitrate **10c** (0.103 g, 0.189 mmol, 4.5 : 1 mixture of isomers) in DMF (3 ml) was added sodium azide (0.061 g, 0.945 mmol). The solution was intensively stirred at 60°C for 5.5 h, then poured into a mixture of Et<sub>2</sub>O (75 ml) and water (75 ml). The aqueous layer was back-extracted with Et<sub>2</sub>O (3 × 30 ml). The combined organic layers were washed with brine (50 ml), dried over Na<sub>2</sub>SO<sub>4</sub> and evaporated under vacuum. The residue was subjected to a column chromatography on silica gel (eluent: Hexane/EtOAc = 10:1 → 5:1) to yield 0.090 g (91%) of azide **11c**. Colorless oil. R<sub>f</sub> = 0.71 (Hexane/EtOAc = 1:1).

<sup>1</sup>H NMR (300 MHz, COSY, CDCl<sub>3</sub>) δ 7.40 – 7.11 (m, 5H, Ph), 7.07 (d, J = 8.5 Hz, 1H, 18-CH), 6.58 (t, J = 75.5 Hz, 1H, 20-CHF<sub>2</sub>), 6.57 (d, J = 8.5 Hz, 1H, 19-CH), 6.56 (s, 1H, 15-CH), 5.39 (s, 1H, 6-CH), 3.93 (td, J = 10.5, 4.0 Hz, 1H, 7-CH<sub>ax</sub>), 3.81 (d, J = 6.9 Hz, 2H, 21-CH), 3.23 (d, J = 14.7 Hz, 1H, 13-CH), 3.14 (d, J = 14.7 Hz, 1H, 13-CH), 2.87 (dd, J = 12.3, 7.4 Hz, 1H, 4-CH<sub>ax</sub>), 2.58 (td, J = 12.5, 3.4 Hz, 1H, 8-CH<sub>ax</sub>), 2.46 – 2.32 (m, 1H, 12-CH), 2.08 – 1.72 (m, 6H, 5-CH<sub>2</sub>, 9-CH<sub>2</sub>, 10-CH and 11-CH), 1.67 – 1.17 (m, 4H, 10-CH, 11-CH, 12-CH and 22-CH), 0.65 (m, 2H, 23-CH<sub>2</sub>), 0.35 (m, 2H, 23-CH<sub>2</sub>).

<sup>13</sup>C NMR (75 MHz, CDCl<sub>3</sub>) δ 155.21 (3-C), 151.03 (16-C), 144.68 (i-Ph), 139.83 (t, J = 3.3 Hz, 17-C), 137.39 (14-C), 128.17 and 128.05 (o-Ph and m-Ph), 125.94 (p-Ph), 123.21 (19-C), 121.19 (18-C), 116.21 (t, J = 259.0 Hz, 20-C), 114.19 (15-C), 90.62 (6-C), 76.34 (7-C), 74.08 (21-C), 51.61 (13-C), 50.93 (8-C), 34.63 (4-C), 33.96 (11-C), 32.36 (5-C), 30.55 (12-C), 26.22 (10-C), 24.72 (9-C), 10.21 (22-C), 3.31 (23-C).

<sup>19</sup>F NMR (282 MHz, CDCl<sub>3</sub>) δ -82.46 (d, J = 75.2 Hz).

FT-IR (KBr, cm<sup>-1</sup>, characteristic CH<sub>2</sub>-N<sub>3</sub> bands): 2103 (asymmetric), 1272 (symmetric).

HRMS (ESI): m/z calcd. for [C<sub>28</sub>H<sub>33</sub>F<sub>2</sub>N<sub>4</sub>O<sub>4</sub>]<sup>+</sup> 527.2464, found 527.2463 [M+H]<sup>+</sup>.

**3-(azidomethyl)-4-(3-(cyclopropylmethoxy)-4-(difluoromethoxy)phenyl)-6-ethoxy-1,2-oxazinane (12a)**

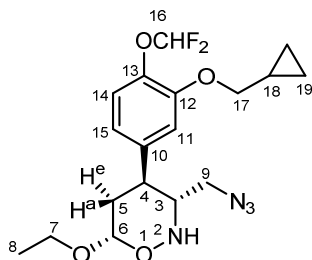

To a stirred solution of azide **11a** (0.170 g, 0.429 mmol) in AcOH (6.25 ml) was added NaBH<sub>3</sub>CN (0.244 g, 3.86 mmol). The reaction mixture was intensively stirred at r.t. for 2 h, then poured into a mixture of EtOAc (50 ml) and saturated aqueous solution of K<sub>2</sub>CO<sub>3</sub> (50 ml). The aqueous layer was back-extracted with EtOAc (2 × 20 ml). The combined organic layers were washed with water (50 ml) and brine (50 ml), dried over Na<sub>2</sub>SO<sub>4</sub> and evaporated under vacuum. The residue was subjected to a column chromatography on silica gel (eluent: Hexane/EtOAc = 10:1 → 5:1 → 3:1) to yield 0.162 g (95%) of azide **12a**. Colorless oil. R<sub>f</sub> = 0.53 (Hexane/EtOAc = 1:1).

<sup>1</sup>H NMR (300 MHz, COSY, HSQC, CDCl<sub>3</sub>) δ 7.11 (d, J = 8.1 Hz, 1H, 14-CH), 6.78 (s, 1H, 11-CH), 6.75 (d, J = 8.1 Hz, 1H, 15-CH), 6.60 (t, J = 75.6 Hz, 1H, 16-CHF<sub>2</sub>), 5.65 (s, 1H, 2-NH), 4.87 (s, 1H, 6-CH<sub>eq</sub>), 3.85 (d, J = 6.9 Hz, 2H, 17-CH<sub>2</sub>), 3.94 – 3.77 (m, 1H, 7-CH), 3.57 (dq, J = 14.3, 7.1 Hz, 1H, 7-CH), 3.37 – 3.22 (m, 2H, 3-CH and 9-CH), 3.13 (dd, J = 12.5, 4.5 Hz, 1H, 9-CH), 3.08 (ddd, J = 10.8, 10.8, 5.6 Hz, 1H, 4-CH<sub>ax</sub>), 2.11 – 1.94 (m, 2H, 5-CH<sub>2</sub>), 1.40 – 1.21 (m, 1H, 18-CH), 1.30 (t, J = 7.1 Hz, 3H, 8-CH<sub>3</sub>), 0.64 (m, 2H, 19-CH<sub>2</sub>), 0.34 (m, 2H, 19-CH<sub>2</sub>).

<sup>13</sup>C NMR (50 MHz, HSQC, CDCl<sub>3</sub>) δ 151.02 (12-C), 140.27 (10-C), 123.30 (15-C), 119.87 (14-C), 116.25 (t, J = 259.9 Hz, 16-C), 114.27 (11-C), 97.87 (6-C), 74.16 (17-C), 63.83 (7-C), 61.37 (3-C), 51.15 (9-C), 37.92 (4-C), 36.51 (5-C), 15.28 (8-C), 10.30 (18-C), 3.26 (19-C) (13-C not observed).

<sup>19</sup>F NMR (188 MHz, CDCl<sub>3</sub>) δ -81.38 (d, J = 75.7 Hz).

HRMS (ESI): m/z calcd. for [C<sub>18</sub>H<sub>25</sub>F<sub>2</sub>N<sub>4</sub>O<sub>4</sub>]<sup>+</sup> 399.1838, found 399.1836 [M+H]<sup>+</sup>.

**3-(azidomethyl)-4-(4-(benzyloxy)-3-(cyclopropylmethoxy)phenyl)-6-ethoxy-1,2-oxazinane (12b)**

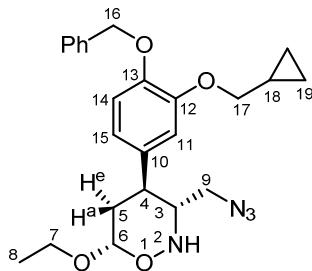

To a stirred solution of azide **11b** (1.493 g, 3.42 mmol) in AcOH (50 ml) was added NaBH<sub>3</sub>CN (1.94 g, 30.9 mmol). The reaction mixture was intensively stirred at r.t. for 3.5 h, then diluted with saturated aqueous solution of K<sub>2</sub>CO<sub>3</sub> (100 ml) and EtOAc (50 ml). The solution was poured into a mixture of EtOAc (150 ml) and saturated aqueous solution of K<sub>2</sub>CO<sub>3</sub> (200 ml). The aqueous layer was back-extracted with EtOAc (2 × 75 ml). The combined organic layers were washed with brine (200 ml), dried over Na<sub>2</sub>SO<sub>4</sub> and evaporated under vacuum. The residue was subjected to a column chromatography on silica gel (eluent: Hexane/EtOAc = 3:1 → 1:1) to yield 1.33 g (89%) of azide **12b**. Colorless oil. R<sub>f</sub> = 0.60 (Hexane/EtOAc = 1:1).

<sup>1</sup>H NMR (300 MHz, CDCl<sub>3</sub>) δ 7.50 – 7.27 (m, 5H, Ph), 6.87 (d, J = 8.2 Hz, 1H, 14-CH), 6.76 (d, J = 2.2 Hz, 1H, 11-CH), 6.69 (dd, J = 8.2, 2.2 Hz, 1H, 15-CH), 5.63 (s, 1H, 2-NH), 5.13 (s, 2H, 16-CH<sub>2</sub>), 4.87 (d, J = 2.9 Hz, 1H, 6-CH<sub>eq</sub>), 3.87 (d, J = 6.9 Hz, 2H, 17-CH<sub>2</sub>), 3.85 – 3.77 (m, 1H, 7-CH), 3.57 (dq, J = 10.0, 7.1 Hz, 1H, 7-CH), 3.31 (dd, J = 12.4, 2.2 Hz, 1H, 9-CH), 3.27 – 3.19 (m, J = 6.4 Hz, 1H, 3-CH), 3.13 (dd, J = 12.4, 4.6 Hz, 1H, 9-CH), 3.01 (td, J = 11.3, 5.5 Hz, 1H, 4-CH<sub>ax</sub>), 2.11 – 1.94 (m, 2H, 5-CH<sub>2</sub>), 1.38 – 1.24 (m, 1H, 18-CH), 1.30 (t, J = 7.1 Hz, 3H, 8-CH<sub>3</sub>), 0.63 (m, 2H, 19-CH<sub>2</sub>), 0.35 (m, 2H, 19-CH<sub>2</sub>).

<sup>13</sup>C NMR (75 MHz, CDCl<sub>3</sub>) δ 149.79 and 148.17 (12-C and 13-C), 137.74 (i-Ph), 134.89 (10-C), 128.58 (m-Ph), 127.89 (15-C), 127.40 (o-Ph), 120.01 (p-Ph), 115.96 (14-C), 114.57 (11-C), 98.09 (6-C), 74.44 (17-C), 71.69 (16-C), 63.78 (9-C), 61.61 (3-C), 51.18 (7-C), 37.62 (4-C), 36.54 (5-C), 15.33 (8-C), 10.60 (18-C), 3.39 (19-C).

HRMS (ESI): m/z calcd. for [C<sub>24</sub>H<sub>31</sub>N<sub>4</sub>O<sub>4</sub>]<sup>+</sup> 439.2340, found 439.2333 [M+H]<sup>+</sup>.



**(4S,6S)-3-(azidomethyl)-4-(3-(cyclopropylmethoxy)-4-(difluoromethoxy)phenyl)-6-(((1S,2R)-2-phenylcyclohexyl)oxy)-1,2-oxazinane (**12c**)**

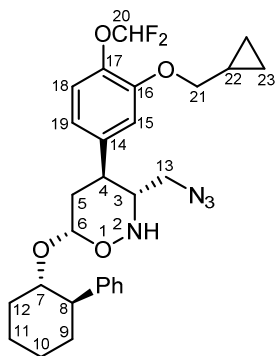

To a stirred solution of azide **11c** (0.025 g, 0.048 mmol) in AcOH (0.7 ml) NaBH<sub>3</sub>CN (0.027 g, 0.428 mmol) was added. The reaction mixture was intensively stirred at r.t. for 1 h, then poured into a mixture of EtOAc (10 ml) and saturated aqueous solution of K<sub>2</sub>CO<sub>3</sub> (10 ml). The aqueous layer was back-extracted with EtOAc (2 × 5 ml). The combined organic layers were washed with water (15 ml) and brine (15 ml), dried over Na<sub>2</sub>SO<sub>4</sub> and evaporated under vacuum. The residue was subjected to a column chromatography on silica gel (eluent: Hexane/EtOAc = 10:1 → 5:1 → 3:1) to yield 0.017 g (67%) of azide **12c**. Colorless oil. R<sub>f</sub> = 0.62 (Hexane/EtOAc = 1:1).

<sup>1</sup>H NMR (300 MHz, COSY, HSQC, CDCl<sub>3</sub>) δ 7.49 – 7.22 (m, 5H, Ph), 7.05 (d, J = 7.7 Hz, 1H, 18-CH), 6.63 (s, 1H, 15-CH), 6.62 (d, J = 7.7 Hz, 1H, 19-CH), 6.57 (t, J = 75.7 Hz, 1H, 20-CHF<sub>2</sub>), 4.96 (s, 1H, 6-CH), 4.10 (d, J = 12.1 Hz, 1H, 2-NH), 3.83 (d, J = 6.8 Hz, 2H, 21-CH<sub>2</sub>), 3.80 – 3.71 (m, 1H, 7-CH), 3.00 (dddd, J = 11.8, 5.0, 1.6 Hz, 1H, 3-CH<sub>ax</sub>), 2.77 (dd, J = 12.9, 1.6 Hz, 1H, 13-CH), 2.66 (ddd, J = 10.6, 10.6, 2.5 Hz, 1H, 8-CH), 2.45 (dd, J = 12.9, 5.0 Hz, 1H, 13-CH), 2.44 (ddd, J = 11.8, 11.8, 3.1 Hz, 1H, 4-CH<sub>ax</sub>), 2.25 – 2.14 (m, 1H, 12-CH), 2.01 – 1.74 (m, 6H, 5-CH<sub>2</sub>, 9-CH<sub>2</sub>, 10-CH, 11-CH), 1.73 – 1.54 (m, 1H, 11-CH), 1.46 – 1.19 (m, 3H, 10-CH, 12-CH, 22-CH), 0.64 (m, 2H, 23-CH<sub>2</sub>), 0.35 (m, 2H, 23-CH<sub>2</sub>).

<sup>13</sup>C NMR (75 MHz, HSQC, CDCl<sub>3</sub>) δ 150.85 (16-C), 144.63 (i-Ph), 140.31 (14-C), 139.44 (t, J = 3.0 Hz, 17-C), 128.92 and 128.13 (o-Ph and m-Ph), 126.85 (p-Ph), 123.10 (19-C), 119.99 (18-C), 118.04 (t, J = 259.7 Hz, 20-C), 113.63 (15-C), 93.32 (6-C), 77.82 (7-C), 74.09 (21-C), 61.15 (3-C), 51.01 (8-C), 50.34 (13-C), 37.75 (4-C), 36.77 (11-C), 33.58 (5-C), 31.39 (12-C), 26.11 (10-C), 24.84 (9-C), 10.28 (22-C), 3.28 (23-C).

<sup>19</sup>F NMR (282 MHz, CDCl<sub>3</sub>) δ -82.37 (d, J = 75.1 Hz).

HRMS (ESI): m/z calcd. for [C<sub>28</sub>H<sub>35</sub>F<sub>2</sub>N<sub>4</sub>O<sub>4</sub>]<sup>+</sup> 529.2621, found 529.2624 [M+H]<sup>+</sup>.

Optical rotation: [α]<sub>D</sub><sup>20</sup> = +206° (CHCl<sub>3</sub>, C = 0.3 g/100 ml).

**ethyl (E)-3-(3-(cyclopropylmethoxy)-4-(difluoromethoxy)phenyl)acrylate (14a)**

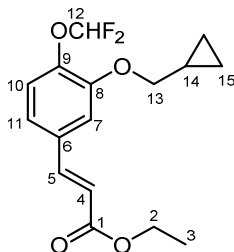

To a stirred solution of aldehyde **6a** (0.518 g, 2.14 mmol) in  $\text{CH}_2\text{Cl}_2$  (5 ml) was added ethyl (triphenylphosphoranylidene)acetate (0.785 g, 2.24 mmol) under argon atmosphere. The reaction mixture was intensively stirred at r.t. for 6 h and then evaporated under vacuum. A mixture of hexane/ $\text{Et}_2\text{O}$  = 9:1 (50 ml) was added to the residue, and the white precipitate was filtered out. The resulting solution was evaporated under vacuum and subjected to a column chromatography on silica gel (eluent: Hexane/ $\text{EtOAc}$  = 4:1) to yield 0.648 g (97%) of ester **14a**. For analytical purposes the product was recrystallized from pentane. White solid, m.p. = 48.5–50.5°C (recrystallized from pentane).  $R_f$  = 0.73 (Hexane/ $\text{EtOAc}$  = 1:1).

$^1\text{H}$  NMR (300 MHz,  $\text{CDCl}_3$ )  $\delta$  7.56 (d,  $J$  = 16.0 Hz, 1H, 5-CH), 7.11 (d,  $J$  = 7.9 Hz, 1H, 10-CH), 7.05 (s, 1H, 7-CH), 7.04 (d,  $J$  = 7.9 Hz, 1H, 11-CH), 6.64 (t,  $J$  = 75.3 Hz, 1H, 12- $\text{CHF}_2$ ), 6.32 (d,  $J$  = 16.0 Hz, 1H, 4-CH), 4.22 (q,  $J$  = 7.0 Hz, 2H, 2- $\text{CH}_2$ ), 3.86 (d,  $J$  = 6.9 Hz, 2H, 13- $\text{CH}_2$ ), 1.30 (t,  $J$  = 7.0 Hz, 3H, 3- $\text{CH}_3$ ), 1.35 – 1.18 (m, 1H, 14-CH), 0.62 (m, 2H, 15- $\text{CH}_2$ ), 0.33 (m, 2H, 15- $\text{CH}_2$ ).

$^{13}\text{C}$  NMR (75 MHz, JMOD,  $\text{CDCl}_3$ )  $\delta$  166.65 (1-C), 150.65 (8-C), 143.44 (5-C), 141.89 (9-C), 132.98 (6-C), 122.58 (10-C), 121.40 (4-C), 118.63 (11-C), 116.04 (t,  $J$  = 260.2 Hz, 12-C), 113.21 (7-C), 73.94 (13-C), 60.55 (2-C), 14.26 (3-C), 10.08 (14-C), 3.19 (15-C).

$^{19}\text{F}$  NMR (282 MHz,  $\text{CDCl}_3$ )  $\delta$  -82.53 (d,  $J$  = 75.2 Hz).

GC-MS (EI):  $m/z$  312 ( $\text{M}^+$ ).

**ethyl 3-(3-(cyclopropylmethoxy)-4-(difluoromethoxy)phenyl)-4-nitropentanoate (15a)**

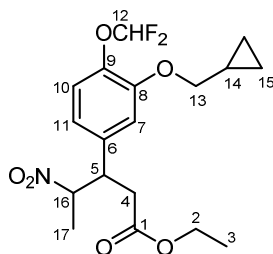

To a stirred solution of ester **14a** (0.648 g, 2.07 mmol) in nitroethane (1.5 ml) was added DBU (0.310 ml, 2.07 mmol). The reaction mixture was stirred for 30 h, then 2M aqueous solution of HCl (15 ml) was added. The mixture was poured into a mixture of MTBE (30 ml) and water (30 ml). The aqueous layer was back-extracted with MTBE (2 × 15 ml). The combined organic layers were washed with brine (50 ml), dried over Na<sub>2</sub>SO<sub>4</sub> and evaporated under vacuum. The residue was subjected to a column chromatography on silica gel (eluent: Hexane/EtOAc = 9:1 → 6:1) to yield 0.729 g (91%) of nitro compound **15a** as two isomers mixture. Isomers were separated for analytical purposes (isomer A: 0.293 g, isomer B: 0.280 g, mixed fraction: 0.156 g).

*Isomer A:* Colorless oil. R<sub>f</sub> = 0.45 (Hexane/EtOAc = 3:1).

<sup>1</sup>H NMR (300 MHz, CDCl<sub>3</sub>) δ 7.04 (d, J = 8.2 Hz, 1H, 10-CH), 6.76 (s, 1H, 7-CH), 6.72 (d, J = 8.2 Hz, 1H, 11-CH), 6.56 (t, J = 75.5 Hz, 1H, 12-CHF<sub>2</sub>), 4.73 (dq, J = 9.2, 6.6 Hz, 1H, 16-CH), 3.91 (q, J = 7.1, 2H, 2-CH<sub>2</sub>), 3.81 (d, J = 6.9 Hz, 2H, 13-CH<sub>2</sub>), 3.59 (ddd, J = 9.7, 9.2, 5.0 Hz, 1H, 5-CH), 2.68 (dd, J = 15.8, 9.7 Hz, 1H, 4-CH), 2.58 (dd, J = 15.8, 5.0 Hz, 1H, 4-CH), 1.28 (d, J = 6.6 Hz, 3H, 17-CH<sub>3</sub>), 1.24 – 1.12 (m, 1H, 14-CH), 1.02 (t, J = 7.1, 3H, 3-CH<sub>3</sub>), 0.56 (m, 2H, 15-CH<sub>2</sub>), 0.28 (m, 2H, 15-CH<sub>2</sub>).

<sup>13</sup>C NMR (75 MHz, CDCl<sub>3</sub>) δ 170.21 (1-C), 150.53 (8-C), 139.87 (9-C), 136.19 (6-C), 122.65 (10-C), 120.51 (11-C), 116.13 (t, J = 259.3 Hz, 12-C), 114.60 (7-C), 86.62 (16-C), 73.80 (13-C), 60.59 (2-C), 45.94 (5-C), 37.39 (4-C), 17.39 (17-C), 13.79 (3-C), 9.95 (14-C), 2.97 (15-C).

<sup>19</sup>F NMR (282 MHz, CDCl<sub>3</sub>) δ -87.79 (d, J = 75.3 Hz).

*Isomer B:* Colorless oil. R<sub>f</sub> = 0.41 (Hexane/EtOAc = 3:1).

<sup>1</sup>H NMR (300 MHz, CDCl<sub>3</sub>) δ 7.03 (d, J = 8.9 Hz, 1H, 10-CH), 6.74 (s, 1H, 7-CH), 6.72 (d, J = 8.9 Hz, 1H, 11-CH), 6.56 (t, J = 75.5 Hz, 1H, 12-CHF<sub>2</sub>), 4.84 (dq, J = 8.4, 6.7 Hz, 1H, 16-CH), 4.00 (q, J = 7.2, 2H, 2-CH<sub>2</sub>), 3.80 (d, J = 6.9 Hz, 2H, 13-CH<sub>2</sub>), 3.63 (ddd, J = 9.1, 8.4, 6.0 Hz, 1H, 5-CH), 2.78 (dd, J = 16.0, 6.0 Hz, 1H, 4-CH), 2.66 (dd, J = 16.0, 9.1 Hz, 1H, 4-CH), 1.52 (d, J = 6.7 Hz, 3H, 17-CH<sub>3</sub>), 1.27 – 1.15 (m, 1H, 14-CH), 1.08 (t, J = 7.2 Hz, 3H, 3-CH<sub>3</sub>), 0.58 (m, 2H, 15-CH<sub>2</sub>), 0.30 (m, 2H, 15-CH<sub>2</sub>).

<sup>13</sup>C NMR (75 MHz, CDCl<sub>3</sub>) δ 170.74 (1-C), 150.38 (8-C), 139.93 (9-C), 136.61 (6-C), 122.50 (10-C), 120.41 (11-C), 116.23 (t, J = 259.1 Hz, 12-C), 114.59 (7-C), 86.55 (16-C), 73.91 (13-C), 60.91 (2-C), 45.62 (5-C), 36.31 (4-C), 16.93 (17-C), 13.93 (3-C), 10.04 (14-C), 3.09 (15-C).

<sup>19</sup>F NMR (282 MHz, CDCl<sub>3</sub>) δ -82.34 (d, J = 75.3 Hz).

MS (EI): m/z 387 (M<sup>+</sup>).

### 3-(3-(cyclopropylmethoxy)-4-(difluoromethoxy)phenyl)-4-nitropentan-1-ol (**16a**)

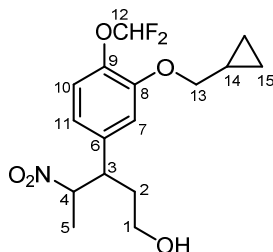

A solution of nitro ester **15a** (0.280 g, 0.722 mmol) in dry  $\text{CH}_2\text{Cl}_2$  (12 ml) in Schlenk flask under argon atmosphere was cooled to  $-78^\circ\text{C}$  and the 1.2M solution of DIBAL-H in toluene (2.4 ml) was added with intensive stirring. The reaction mixture was stirred for 5 min at  $-78^\circ\text{C}$  and then 16 h allowing to warm to r.t. The reaction mixture was again cooled to  $-78^\circ\text{C}$  and the 1.2M solution of DIBAL-H in toluene (1.2 ml) was added, then the mixture was allowed to warm to r.t. and stirred for 8.5 h. The 1M aqueous solution of HCl (10 ml) was added and the resulting solution was poured into a mixture of  $\text{CH}_2\text{Cl}_2$  (50 ml) and water (50 ml). The aqueous layer was back-extracted with  $\text{CH}_2\text{Cl}_2$  ( $2 \times 20$  ml). The combined organic layers were washed with water (50 ml) and brine (50 ml), dried over  $\text{Na}_2\text{SO}_4$  and evaporated under vacuum. The residue was subjected to a column chromatography on silica gel (eluent: Hexane/EtOAc = 7:1  $\rightarrow$  5:1  $\rightarrow$  3:1  $\rightarrow$  1:1) to yield 0.139 g (56%) of alcohol **16a**.

*Isomer A* (obtained from isomer A of ester **15a**): colorless oil.  $R_f = 0.45$  (Hexane/EtOAc = 1:1).

$^1\text{H}$  NMR (300 MHz,  $\text{CDCl}_3$ )  $\delta$  7.13 (d,  $J = 7.5$  Hz, 1H, 10-CH), 6.75 (s, 1H, 7-CH), 6.73 (d,  $J = 7.5$  Hz, 1H, 11-CH), 6.62 (t,  $J = 75.4$  Hz, 1H, 12- $\text{CHF}_2$ ), 4.78 – 4.62 (m, 1H, 4-CH), 3.86 (d,  $J = 6.9$  Hz, 2H, 13- $\text{CH}_2$ ), 3.51 (dd,  $J = 10.6, 5.3$  Hz, 1H, 3-CH), 3.40 – 3.25 (m, 2H, 1- $\text{CH}_2$ ), 1.86 (dd,  $J = 13.6, 6.5$  Hz, 1H, 2-CH), 1.32 (d,  $J = 6.6$  Hz, 3H, 5- $\text{CH}_3$ ), 1.30 – 1.23 (m, 1H, 14-CH), 0.96 (dd,  $J = 13.6, 6.7$  Hz, 1H, 2-CH), 0.65 (m, 2H, 15- $\text{CH}_2$ ), 0.35 (m, 2H, 15- $\text{CH}_2$ ) (OH not observed).

$^{13}\text{C}$  NMR (75 MHz, JMOD,  $\text{CDCl}_3$ )  $\delta$  150.99 (8-C), 139.36 (9-C), 136.85 (6-C), 123.22 (10-C), 120.80 (11-C), 114.80 (7-C), 87.96 (4-C), 74.21 (13-C), 59.84 (1-C), 46.73 (3-C), 35.33 (2-C), 18.04 (5-C), 10.23 (14-C), 3.30 (15-C) (C-12 not observed).

$^{19}\text{F}$  NMR (282 MHz,  $\text{CDCl}_3$ )  $\delta$  -82.44 (d,  $J = 75.5$  Hz).

*Isomer B* (obtained from isomer B of ester **15a**): colorless oil.  $R_f = 0.24$  (Hexane/EtOAc = 1:1).

$^1\text{H}$  NMR (300 MHz,  $\text{CDCl}_3$ )  $\delta$  7.09 (d,  $J = 7.6$  Hz, 1H, 10-CH), 6.74 (d,  $J = 7.6$  Hz, 1H, 11-CH), 6.74 (d,  $J = 1.7$  Hz, 1H, 7-CH), 6.59 (t,  $J = 75.4$  Hz, 1H, 12- $\text{CHF}_2$ ), 4.78 (dq,  $J = 12.0, 6.6$  Hz, 1H, 4-CH), 3.84 (d,  $J = 6.8$  Hz, 2H, 13- $\text{CH}_2$ ), 3.57 (ddd,  $J = 12.0, 6.1, 4.9$  Hz, 1H, 3-CH), 3.35 (m, 2H, 1- $\text{CH}_2$ ), 2.10 – 1.95 (m, 1H, 2-CH), 1.81 (ddd,  $J = 14.0, 11.1, 4.9$  Hz, 1H, 2-CH), 1.61 (d,  $J = 6.6$  Hz, 3H, 5- $\text{CH}_3$ ), 1.29 – 1.15 (m, 1H, 14-CH), 0.63 (m, 2H, 15- $\text{CH}_2$ ), 0.34 (m, 2H, 15- $\text{CH}_2$ ) (OH not observed).

$^{13}\text{C}$  NMR (75 MHz, JMOD,  $\text{CDCl}_3$ )  $\delta$  150.70 (8-C), 141.88 (9-C), 137.19 (6-C), 122.87 (10-C), 120.69 (11-C), 116.33 (t,  $J = 255.9$  Hz, 12-C), 114.95 (7-C), 87.98 (4-C), 74.22 (13-C), 59.91 (1-C), 46.52 (3-C), 33.67 (2-C), 17.58 (5-C), 10.24 (14-C), 3.30 (15-C).

$^{19}\text{F}$  NMR (282 MHz,  $\text{CDCl}_3$ )  $\delta$  -82.27 (d,  $J = 75.7$  Hz).

MS (EI):  $m/z$  345 ( $\text{M}^+$ ).

**4-(3-(cyclopropylmethoxy)-4-(difluoromethoxy)phenyl)-3-methyl-5,6-dihydro-4H-1,2-oxazine 2-oxide (18a)**

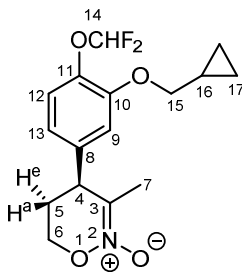

A solution of nitro alcohol **16a** (0.244 g, 0.707 mmol) in dry  $\text{CH}_2\text{Cl}_2$  (2.2 ml) in Schlenk flask under argon atmosphere was cooled to  $0^\circ\text{C}$ . Triethylamine (0.160 ml, 1.13 mmol) and methanesulfonyl chloride (0.070 ml, 0.905 mmol) were added. The reaction mixture was intensively stirred at  $0^\circ\text{C}$  for 15 min and then kept without stirring at this temperature for 5.5 h. The solution was diluted with water (10 ml) and poured into  $\text{CH}_2\text{Cl}_2$  (30 ml). The aqueous layer was back-extracted with  $\text{CH}_2\text{Cl}_2$  ( $2 \times 30$  ml). The combined organic layers were washed saturated solution of  $\text{NH}_4\text{Cl}$  (50 ml) and brine (50 ml), dried over  $\text{Na}_2\text{SO}_4$  and evaporated under vacuum.

The 1M solution of NaI in acetone (1.2 ml) was added and the mixture was kept at r.t. for 64 h. The solution was diluted with EtOAc (10 ml) and poured into a mixture of EtOAc (30 ml) and water (30 ml). The aqueous layer was back-extracted with EtOAc ( $3 \times 30$  ml). The combined organic layers were washed with water (50 ml) and brine ( $2 \times 40$  ml) and brine (40 ml), dried over  $\text{Na}_2\text{SO}_4$  and evaporated under vacuum to give crude iodide **17a**.

The crude product was dissolved in dry  $\text{CH}_2\text{Cl}_2$  (2.3 ml) and DBU (0.085 ml, 0.571 mmol) was added. The reaction mixture was stirred at r.t. for 3.5 h, then diluted with EtOAc (40 ml) and poured into a 0.25M solution of  $\text{NaHSO}_4$  (40 ml). The aqueous layer was back-extracted with EtOAc ( $2 \times 20$  ml). The combined organic layers were washed with brine (40 ml), dried over  $\text{Na}_2\text{SO}_4$  and evaporated under vacuum. The residue was subjected to a column chromatography on silica gel (eluent: Hexane/EtOAc = 1:1  $\rightarrow$  0:1) to yield 0.146 g (63%) of nitronate **18a**. Colorless oil.  $R_f = 0.05$  (Hexane/EtOAc = 1:1).

$^1\text{H}$  NMR (300 MHz,  $\text{CDCl}_3$ )  $\delta$  7.12 (d,  $J = 8.3$  Hz, 1H, 12-CH), 6.73 (d,  $J = 8.3$  Hz, 1H, 13-CH), 6.70 (s, 1H, 9-CH), 6.60 (t,  $J = 75.4$  Hz, 1H, 14- $\text{CHF}_2$ ), 4.41 (m, 2H, 6- $\text{CH}_2$ ), 3.83 (d,  $J = 7.0$  Hz, 2H, 15- $\text{CH}_2$ ), 3.80 – 3.60 (m, 1H, 4-CH), 2.36 (dt,  $J = 13.5, 6.3$  Hz, 1H, 5- $\text{CH}_{\text{eq}}$ ), 2.01 (ddd,  $J = 13.5, 11.9, 7.7$  Hz, 1H, 5- $\text{CH}_{\text{ax}}$ ), 1.89 (s, 3H, 7- $\text{CH}_3$ ), 1.43 – 1.07 (m, 1H, 16-CH), 0.64 (m, 2H, 17- $\text{CH}_2$ ), 0.34 (m, 2H, 17- $\text{CH}_2$ ).

$^{13}\text{C}$  NMR (75 MHz, JMOD,  $\text{CDCl}_3$ )  $\delta$  150.95 (10-C), 139.54 (8-C), 123.36 (12-C), 122.24 (3-C), 120.64 (13-C), 115.85 (t,  $J = 255.5$  Hz, 14-C), 113.64 (9-C), 74.24 (15-C), 69.27 (6-C), 43.65 (4-C), 30.38 (5-C), 18.23 (7-C), 10.20 (16-C), 3.28 (17-C) (11-C not observed).

$^{19}\text{F}$  NMR (282 MHz,  $\text{CDCl}_3$ )  $\delta$  -82.51 (d,  $J = 75.4$  Hz).

HRMS (ESI):  $m/z$  calcd. for  $[\text{C}_{16}\text{H}_{19}\text{F}_2\text{NO}_4]^+$  328.1355, found 328.1350  $[\text{M}+\text{H}]^+$ .

**4-(3-(cyclopropylmethoxy)-4-(difluoromethoxy)phenyl)-3,6,6-trimethyl-5,6-dihydro-4H-1,2-oxazine 2-oxide (18b)**

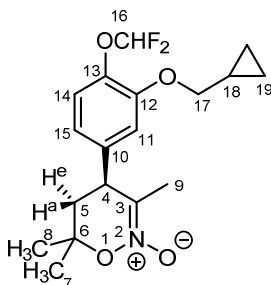

A solution of nitroalkene **4a** (0.628 g, 2.10 mmol) in dry  $\text{CH}_2\text{Cl}_2$  (18 ml) with  $\text{CaH}_2$  (ca. 0.05 g) was cooled to  $-78^\circ\text{C}$  (acetone/dry ice) in a Schlenk flask under argon atmosphere.  $\text{SnCl}_4$  (0.270 ml, 2.31 mmol) was added with intensive stirring. In 5 min a solution of 2-methylpropene (excess, ca. 1 g) in dry  $\text{CH}_2\text{Cl}_2$  (13 ml) was added dropwise. The reaction mixture was intensively stirred at  $-78^\circ\text{C}$  for 1 h, then the resulting orange-colored solution was poured into a mixture of EtOAc (70 ml) and saturated aqueous solution of  $\text{K}_2\text{CO}_3$  (70 ml). The aqueous layer was back-extracted with EtOAc ( $2 \times 50$  ml). The combined organic layers were washed with water (100 ml) and brine (100 ml), dried over  $\text{Na}_2\text{SO}_4$  and evaporated under vacuum. The residue was subjected to a column chromatography on silica gel (eluent: Hexane/EtOAc = 1:1  $\rightarrow$  0:1) to yield 0.584 g (78%) of nitronate **18b**. For analytical purposes the product was recrystallized from hexane/ $\text{Et}_2\text{O}$  = 1:1 mixture. White solid, m.p. =  $104\text{--}108^\circ\text{C}$  (recrystallized from hexane/ $\text{Et}_2\text{O}$  = 1:1).  $R_f$  = 0.12 (Hexane/EtOAc = 1:1).

$^1\text{H}$  NMR (300 MHz,  $\text{CDCl}_3$ )  $\delta$  7.13 (d,  $J$  = 8.1 Hz, 1H, 14-CH), 6.74 (d,  $J$  = 8.1 Hz, 1H, 15-CH), 6.69 (s, 1H, 11-CH), 6.62 (t,  $J$  = 75.4 Hz, 1H, 16- $\text{CHF}_2$ ), 3.84 (d,  $J$  = 6.8 Hz, 2H, 17- $\text{CH}_2$ ), 3.66 (dd,  $J$  = 10.4, 8.0 Hz, 1H, 4- $\text{CH}_{\text{ax}}$ ), 2.11 (dd,  $J$  = 13.9, 8.0 Hz, 1H, 5- $\text{CH}_{\text{eq}}$ ), 1.97 – 1.84 (m, 1H, 5- $\text{CH}_{\text{ax}}$ ), 1.88 (s, 3H, 9- $\text{CH}_3$ ), 1.45 (s, 3H, 7- $\text{CH}_3$  or 8- $\text{CH}_3$ ), 1.42 (s, 3H, 7- $\text{CH}_3$  or 8- $\text{CH}_3$ ), 1.33 – 1.18 (m, 1H, 18-CH), 0.66 (m, 2H, 19- $\text{CH}_2$ ), 0.36 (m, 2H, 19- $\text{CH}_2$ ).

$^{13}\text{C}$  NMR (75 MHz,  $\text{CDCl}_3$ )  $\delta$  151.36 (12-C), 139.92 (13-C), 139.06 (10-C), 123.37 (14-C), 121.45 (3-C), 120.77 (15-C), 116.19 (t,  $J$  = 260.0 Hz, 16-C), 113.57 (11-C), 81.39 (6-C), 74.26 (17-C), 43.22 (5-C), 41.76 (4-C), 27.89 and 22.21 (7-C and 8-C), 17.35 (9-C), 10.22 (18-C), 3.31 (19-C).

$^{19}\text{F}$  NMR (282 MHz,  $\text{CDCl}_3$ )  $\delta$  -82.53 (d,  $J$  = 75.4 Hz).

HRMS (ESI):  $m/z$  calcd. for  $[\text{C}_{18}\text{H}_{24}\text{F}_2\text{NO}_4]^+$  356.1668, found 356.1658  $[\text{M}+\text{H}]^+$ .

**3-(azidomethyl)-4-(3-(cyclopropylmethoxy)-4-(difluoromethoxy)phenyl)-5,6-dihydro-4H-1,2-oxazine (21a)**

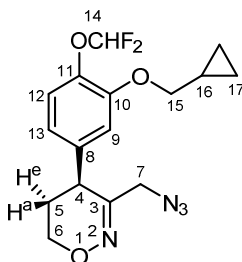

To a stirred solution of nitronate **18a** (0.146 g, 0.446 mmol) in dry  $\text{CH}_2\text{Cl}_2$  (0.9 ml) in Schlenk flask was added triethylamine (0.095 ml, 0.699 mmol) under argon atmosphere. The reaction mixture was cooled to  $-78^\circ\text{C}$  and  $\text{Me}_3\text{SiBr}$  (0.082 ml, 0.624 mmol) was added. The mixture was intensively stirred for 30 min at  $-78^\circ\text{C}$  and then kept for 28 h at  $-20^\circ\text{C}$  without stirring. The mixture was allowed to warm to  $0^\circ\text{C}$  (ice water bath), and the solution of  $\text{CoBr}_2$  (0.195 g, 0.891 mmol) in THF (2 ml) was added. The reaction mixture was stirred for 45 min at  $0^\circ\text{C}$ , then 72 h at r.t., then the resulting solution was poured into a mixture of EtOAc (40 ml) and 0.25M aqueous solution of  $\text{NaHSO}_4$  (40 ml). The aqueous layer was back-extracted with EtOAc ( $2 \times 30$  ml). The combined organic layers were washed with water (50 ml) and brine (50 ml), dried over  $\text{Na}_2\text{SO}_4$  and evaporated under vacuum to give bromide **20a**.

The crude product was dissolved in DMF (6 ml) and sodium azide (0.145 g, 2.23 mmol) was added. The mixture was intensively stirred at  $60^\circ\text{C}$  for 4.5 h and then poured into a mixture of MTBE (40 ml) and water (40 ml). The aqueous layer was back-extracted with MTBE ( $2 \times 30$  ml). The combined organic layers were washed with water (50 ml) and brine (50 ml), dried over  $\text{Na}_2\text{SO}_4$  and evaporated under vacuum. The residue was subjected to a column chromatography on silica gel (eluent: Hexane/EtOAc = 10:1  $\rightarrow$  5:1) to yield 0.119 g (76%) of azide **21a**. Colorless oil.  $R_f = 0.56$  (Hexane/EtOAc = 1:1).

$^1\text{H}$  NMR (300 MHz,  $\text{CDCl}_3$ )  $\delta$  7.13 (d,  $J = 7.7$  Hz, 1H, 12-CH), 6.74 (s, 1H, 9-CH), 6.73 (d,  $J = 7.7$  Hz, 1H, 13-CH), 6.60 (t,  $J = 75.4$  Hz, 1H, 14- $\text{CHF}_2$ ), 4.06 (t,  $J = 5.1$  Hz, 2H, 6- $\text{CH}_2$ ), 3.88 (d,  $J = 14.6$  Hz, 1H, 7-CH), 3.84 (d,  $J = 7.2$  Hz, 2H, 15- $\text{CH}_2$ ), 3.62 (d,  $J = 14.6$  Hz, 1H, 7-CH), 3.55 (dd,  $J = 10.2, 6.1$  Hz, 1H, 4- $\text{CH}_{\text{ax}}$ ), 2.30 (dd,  $J = 13.2, 6.1$  Hz, 1H, 5- $\text{CH}_{\text{eq}}$ ), 1.98 (ddd,  $J = 13.2, 10.2, 5.1$  Hz, 1H, 5- $\text{CH}_{\text{ax}}$ ), 1.35 – 1.14 (m, 1H, 16-CH), 0.63 (m, 2H, 17- $\text{CH}_2$ ), 0.34 (m, 2H, 17- $\text{CH}_2$ ).

$^{13}\text{C}$  NMR (75 MHz,  $\text{CDCl}_3$ )  $\delta$  154.22 (3-C), 151.11 (10-C), 139.77 and 138.68 (8-C and 11-C), 123.28 (12-C), 120.77 (13-C), 116.14 (t,  $J = 260.1$  Hz, 14-C), 114.18 (9-C), 74.06 (15-C), 64.02 (6-C), 52.99 (7-C), 36.77 (4-C), 28.36 (5-C), 10.13 (16-C), 3.22 (17-C).

$^{19}\text{F}$  NMR (282 MHz,  $\text{CDCl}_3$ )  $\delta$  -82.47 (d,  $J = 75.4$  Hz).

HRMS (ESI):  $m/z$  calcd. for  $[\text{C}_{16}\text{H}_{20}\text{F}_2\text{N}_4\text{O}_3]^+$  353.1420, found 353.1414  $[\text{M}+\text{H}]^+$ .

**3-(azidomethyl)-4-(3-(cyclopropylmethoxy)-4-(difluoromethoxy)phenyl)-6,6-dimethyl-5,6-dihydro-4H-1,2-oxazine (21b)**

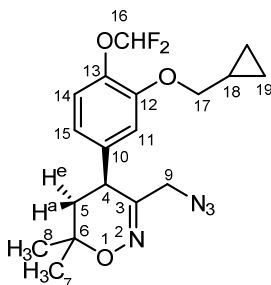

To a stirred solution of nitronate **18b** (0.552 g, 1.56 mmol) in dry  $\text{CH}_2\text{Cl}_2$  in Schlenk flask (9 ml) was added triethylamine (0.324 ml, 2.33 mmol) under argon atmosphere. The reaction mixture was cooled to  $-78^\circ\text{C}$  and  $\text{Me}_3\text{SiBr}$  (0.290 ml, 2.18 mmol) was added. The mixture was intensively stirred for 1 h at  $-78^\circ\text{C}$  and then kept for 48 h at  $-20^\circ\text{C}$  without stirring. The mixture was allowed to warm to  $0^\circ\text{C}$  (ice water bath), and the solution of  $\text{CoBr}_2$  (0.688 g, 3.14 mmol) in dry THF (6 ml) was added. The reaction mixture was stirred for 30 min at  $0^\circ\text{C}$  and 5 h at r.t., then the resulting solution was poured into a mixture of EtOAc (50 ml) and 0.25M aqueous solution of  $\text{NaHSO}_4$  (50 ml). The aqueous layer was back-extracted with EtOAc ( $2 \times 25$  ml). The combined organic layers were washed with water (50 ml) and brine (50 ml), dried over  $\text{Na}_2\text{SO}_4$  and evaporated under vacuum to give bromide **20b**.

The crude product was dissolved in DMF (20 ml) and sodium azide (0.505 g, 7.78 mmol) was added. The mixture was intensively stirred at  $60^\circ\text{C}$  for 5.5 h and then poured into a mixture of MTBE (70 ml) and water (70 ml). The aqueous layer was back-extracted with MTBE ( $3 \times 30$  ml). The combined organic layers were washed with water (60 ml) and brine (60 ml), dried over  $\text{Na}_2\text{SO}_4$  and evaporated under vacuum. The residue was subjected to a column chromatography on silica gel (eluent: Hexane/EtOAc = 1:0  $\rightarrow$  10:1  $\rightarrow$  5:1) to yield 0.488 g (83%) of azide **21b**. Yellow oil.  $R_f = 0.76$  (Hexane/EtOAc = 1:1).

$^1\text{H}$  NMR (300 MHz,  $\text{CDCl}_3$ )  $\delta$  7.14 (d,  $J = 8.0$  Hz, 1H, 14-CH), 6.76 (d,  $J = 8.0$  Hz, 1H, 15-CH), 6.74 (s, 1H, 11-CH), 6.62 (t,  $J = 75.4$  Hz, 1H, 16- $\text{CHF}_2$ ), 3.89 (d,  $J = 14.5$  Hz, 1H, 9-CH), 3.85 (d,  $J = 6.6$  Hz, 2H, 17- $\text{CH}_2$ ), 3.55 (dd,  $J = 12.0, 7.7$  Hz, 1H, 4- $\text{CH}_{\text{ax}}$ ), 3.52 (d,  $J = 14.5$  Hz, 1H, 9-CH), 2.11 (dd,  $J = 13.6, 7.7$  Hz, 1H, 5- $\text{CH}_{\text{eq}}$ ), 1.90 (dd,  $J = 13.6, 12.0$  Hz, 1H, 5- $\text{CH}_{\text{ax}}$ ), 1.39 (s, 3H, 7- $\text{CH}_3$  or 8- $\text{CH}_3$ ), 1.31 (s, 3H, 7- $\text{CH}_3$  or 8- $\text{CH}_3$ ), 1.29 – 1.19 (m, 1H, 18-CH), 0.65 (m, 2H, 19- $\text{CH}_2$ ), 0.36 (m, 2H, 19- $\text{CH}_2$ ).

$^{13}\text{C}$  NMR (75 MHz, JMOD,  $\text{CDCl}_3$ )  $\delta$  154.13 (3-C), 151.31 (12-C), 139.62 and 137.97 (10-C and 13-C), 123.53 (14-C), 119.98 (15-C), 117.89 (t,  $J = 260.0$  Hz, 16-C), 114.15 (11-C), 75.25 (6-C), 74.20 (17-C), 52.85 (9-C), 40.15 (5-C), 37.67 (4-C), 28.46 and 22.54 (7-C and 8-C), 10.24 (18-C), 3.33 (19-C).

$^{19}\text{F}$  NMR (282 MHz,  $\text{CDCl}_3$ )  $\delta$  -82.49 (d,  $J = 75.4$  Hz).

HRMS (ESI):  $m/z$  calcd. for  $[\text{C}_{18}\text{H}_{22}\text{F}_2\text{N}_4\text{O}_3]^+$  381.1733, found 381.1729  $[\text{M}+\text{H}]^+$ .



### 3-(azidomethyl)-4-(3-(cyclopropylmethoxy)-4-(difluoromethoxy)phenyl)-1,2-oxazinane (**22a**)

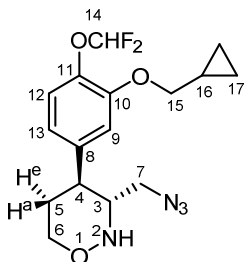

To a stirred solution of azide **21a** (0.109 g, 0.309 mmol) in AcOH (2.7 ml) NaBH<sub>3</sub>CN (0.175 g, 2.78 mmol) was added. The reaction mixture was intensively stirred at r.t. for 1 h, then saturated aqueous solution of Na<sub>2</sub>CO<sub>3</sub> (10 ml) was added into the flask. The mixture was poured into a mixture of EtOAc (30 ml) and saturated aqueous solution of Na<sub>2</sub>CO<sub>3</sub> (30 ml). The aqueous layer was back-extracted with EtOAc (2 × 20 ml). The combined organic layers were washed with water (50 ml) and brine (50 ml), dried over Na<sub>2</sub>SO<sub>4</sub> and evaporated under vacuum. The residue was subjected to a column chromatography on silica gel (eluent: Hexane/EtOAc = 10:1 → 5:1 → 1:1) to yield 0.098 g (89%) of azide **22a** as a mixture of diastereomers (ratio 3,4-*trans*/3,4-*cis* = 6.5 : 1). Colorless oil. R<sub>f</sub> = 0.43 (Hexane/EtOAc = 1:1).

#### Major isomer:

<sup>1</sup>H NMR (300 MHz, COSY, HSQC, CDCl<sub>3</sub>) δ 7.12 (d, J = 8.9 Hz, 1H, 12-CH), 6.79 (d, J = 2.4 Hz, 1H, 9-CH), 6.77 (dd, J = 8.9, 2.4 Hz, 1H, 13-CH), 6.61 (t, J = 75.6 Hz, 1H, 14-CHF<sub>2</sub>), 5.49 (s, br, 1H, 2-NH), 4.12 (m, 1H, 6-CH<sub>ax</sub>), 3.87 (d, J = 6.9 Hz, 2H, 15-CH<sub>2</sub>), 3.83 (ddd, J = 11.8, 2.9, 2.6 Hz, 1H, 6-CH<sub>eq</sub>), 3.35 – 3.25 (m, 1H, 3-CH), 3.30 (dd, J = 13.0, 6.9 Hz, 1H, 7-CH), 3.10 (dd, J = 13.0, 8.0 Hz, 1H, 7-CH), 2.67 (ddd, J = 11.8, 10.1, 4.5 Hz, 1H, 4-CH<sub>ax</sub>), 2.02 – 1.89 (m, 1H, 5-CH<sub>ax</sub>), 1.84 (dddd, J = 13.5, 4.5, 2.6, 2.2 Hz, 1H, 5-CH<sub>eq</sub>), 1.34 – 1.20 (m, 1H, 16-CH), 0.65 (m, 2H, 17-CH<sub>2</sub>), 0.36 (m, 2H, 17-CH<sub>2</sub>).

<sup>13</sup>C NMR (75 MHz, HSQC, CDCl<sub>3</sub>) δ 150.95 (10-C), 140.22 and 139.57 (8-C and 11-C), 123.24 (12-C), 120.19 (13-C), 116.31 (t, J = 259.7 Hz, 14-C), 113.89 (9-C), 74.11 (15-C), 70.85 (6-C), 61.92 (3-C), 51.50 (7-C), 44.23 (4-C), 33.53 (5-C), 10.28 (16-C), 3.29 (17-C).

<sup>19</sup>F NMR (282 MHz, CDCl<sub>3</sub>) δ -81.59 (d, J = 75.6 Hz).

HRMS (ESI): m/z calcd for [C<sub>16</sub>H<sub>21</sub>F<sub>2</sub>N<sub>4</sub>O<sub>3</sub>]<sup>+</sup> 355.1576, found 355.1571 [M+H]<sup>+</sup>.

#### Minor isomer:

<sup>1</sup>H NMR (300 MHz, COSY, HSQC, characteristic signals, CDCl<sub>3</sub>) δ 4.23 – 4.19 (m, 1H, 6-CH), 3.95 (dd, J = 11.3, 2.7 Hz, 1H, 6-CH), 3.36 (m, 1H, 4-CH), 2.95 (dd, J = 12.1, 3.4 Hz, 1H, 7-CH), 2.15 – 2.12 (m, 1H, 5-CH), 1.76 – 1.71 (m, 1H, 5-CH).

<sup>13</sup>C NMR (75 MHz, HSQC, characteristic signals, CDCl<sub>3</sub>) δ 69.93 (6-C), 60.92 (3-C), 47.89 (7-C), 41.35 (4-C), 26.01 (5-C).

**3-(azidomethyl)-4-(3-(cyclopropylmethoxy)-4-(difluoromethoxy)phenyl)-6,6-dimethyl-1,2-oxazinane (22b)**

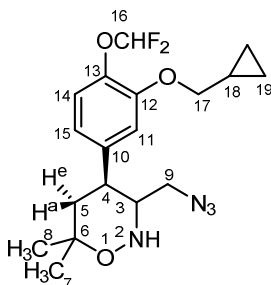

To a stirred solution of azide **21b** (0.293 g, 0.771 mmol) in AcOH (2.5 ml) NaBH<sub>3</sub>CN (0.435 g, 6.94 mmol) was added. The reaction mixture was intensively stirred at r.t. for 4 h and then saturated aqueous solution of Na<sub>2</sub>CO<sub>3</sub> (excess) was added into the flask. The mixture was poured into a mixture of EtOAc (60 ml) and saturated aqueous solution of Na<sub>2</sub>CO<sub>3</sub> (60 ml). The aqueous layer was back-extracted with EtOAc (2 × 40 ml). The combined organic layers were washed with water (70 ml) and brine (70 ml), dried over Na<sub>2</sub>SO<sub>4</sub> and evaporated under vacuum. The residue was subjected to a column chromatography on silica gel (eluent: Hexane/EtOAc = 10:1 → 5:1 → 3:1) to yield 0.180 g (61%) of azide **22b**. Colorless oil. R<sub>f</sub> = 0.39 (Hexane/EtOAc = 3:1).

<sup>1</sup>H NMR (300 MHz, CDCl<sub>3</sub>) δ 7.11 (d, J = 7.7 Hz, 1H, 14-CH), 6.77 (s, 1H, 11-CH), 6.76 (d, J = 7.7 Hz, 1H, 15-CH), 6.61 (t, J = 75.6 Hz, 1H, 16-CHF<sub>2</sub>), 5.33 (s, br, 1H, 2-NH), 3.87 (d, J = 6.9 Hz, 2H, 17-CH<sub>2</sub>), 3.32 (d, J = 10.8 Hz, 1H, 9-CH), 3.21 – 3.06 (m, 1H, 3-CH), 3.13 (d, J = 10.8 Hz, 1H, 9-CH), 2.83 (td, J = 10.1, 7.4 Hz, 1H, 4-CH<sub>ax</sub>), 1.78 – 1.68 (m, 2H, 5-CH<sub>2</sub>), 1.40 (s, 3H, 7-CH<sub>3</sub> or 8-CH<sub>3</sub>), 1.33 – 1.20 (m, 1H, 18-CH), 1.24 (s, 3H, 7-CH<sub>3</sub> or 8-CH<sub>3</sub>), 0.65 (m, 2H, 19-CH<sub>2</sub>), 0.36 (m, 2H, 19-CH<sub>2</sub>).

<sup>13</sup>C NMR (75 MHz, CDCl<sub>3</sub>) δ 149.51 (12-C), 140.44 and 139.45 (10-C and 13-C), 123.22 (14-C), 120.21 (15-C), 115.36 (t, J = 256.9 Hz, 16-C), 113.92 (11-C), 74.84 (6-C), 74.12 (17-C), 61.51 (3-C), 51.38 (9-C), 43.85 (5-C), 40.93 (4-C), 29.29 and 22.07 (7-C and 8-C), 10.31 (18-C), 3.31 (19-C).

<sup>19</sup>F NMR (282 MHz, CDCl<sub>3</sub>) δ -82.39 (d, J = 75.6 Hz).

HRMS (ESI): m/z calcd. for [C<sub>18</sub>H<sub>24</sub>F<sub>2</sub>N<sub>4</sub>O<sub>3</sub>]<sup>+</sup> 383.1889, found 383.1877 [M+H]<sup>+</sup>.

***Rel-(R)-4-((S)-1-(3-(cyclopropylmethoxy)-4-(difluoromethoxy)phenyl)-3-hydroxy-3-methylbutyl)imidazolidin-2-one (24b)***

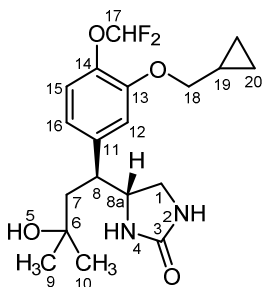

To a solution of **2b** (0.078 g, 0.204 mmol) in methanol (2 ml) in a vial equipped with a magnetic stirrer was added a suspension of Raney<sup>®</sup> nickel (ca. 50 mg, washed with methanol) in methanol (1 ml). The vial was placed to a steel autoclave which was flushed and filled with H<sub>2</sub> to a pressure of 40 bar. The mixture was stirred at 70°C for 5.5 h. Then the autoclave was cooled to r.t. and slowly evacuated, and then the catalyst was removed. The solvent was evaporated under vacuum. The residue was subjected to a column chromatography on silica gel (eluent: EtOAc/MeOH = 1:0 → 10:1 → 3:1) to yield 0.068 g (87%) of alcohol **3b**. Colorless oil. R<sub>f</sub> = 0.55 (EtOAc/MeOH = 3:1).

<sup>1</sup>H NMR (300 MHz, CDCl<sub>3</sub>) δ 7.26 (s, 1H, NH), 7.08 (d, J = 8.4 Hz, 1H, 15-CH), 6.75 (s, 1H, 12-CH), 6.71 (d, J = 8.4 Hz, 1H, 16-CH), 6.59 (t, J = 75.5 Hz, 1H, 17-CHF<sub>2</sub>), 4.86 (s, 1H, NH), 3.85 (d, J = 6.7 Hz, 2H, 18-CH<sub>2</sub>), 3.10 (dd, J = 8.9, 8.6 Hz, 1H, 1-CH), 3.00 (t, J = 8.6, 8.2 Hz, 1H, 1-CH), 2.96 – 2.82 (m, 2H, 8-CH and 8a-CH), 1.99 (dd, J = 14.7, 4.3 Hz, 1H, 7-CH), 1.87 (dd, J = 14.7, 7.1 Hz, 1H, 7-CH), 1.32 – 1.22 (m, 1H, 19-CH), 1.25 (br, 1H, OH), 1.19 (s, 3H, 9-CH<sub>3</sub> or 10-CH<sub>3</sub>), 1.10 (s, 3H, 9-CH<sub>3</sub> or 10-CH<sub>3</sub>), 0.64 (m, 2H, 20-CH<sub>2</sub>), 0.35 (m, 2H, 20-CH<sub>2</sub>).

<sup>13</sup>C NMR (75 MHz, CDCl<sub>3</sub>) δ 164.38 (3-C), 150.78 (13-C), 141.81 (14-C), 139.37 (t, J = 2.9 Hz, 11-C), 123.05 (15-C), 120.65 (16-C), 116.32 (t, J = 259.6 Hz, 17-C), 114.54 (12-C), 74.17 (18-C), 70.64 (6-C), 58.87 (8a-C), 47.81 (7-C), 47.02 (1-C), 45.61 (8-C), 31.90 and 28.36 (9-C and 10-C), 10.29 (19-C), 3.30 (20-C).

<sup>19</sup>F NMR (282 MHz, CDCl<sub>3</sub>) δ -82.36 (d, J = 75.5 Hz).

HRMS (ESI): m/z calcd. for [C<sub>19</sub>H<sub>26</sub>F<sub>2</sub>N<sub>2</sub>O<sub>4</sub>]<sup>+</sup> 385.1933, found 385.1925 [M+H]<sup>+</sup>.

### 3. Biological studies: primary data

#### *In vitro* enzymatic assay for recombinant human PDE4B1

##### Compounds

| Compound I.D.      | Stock Concentration | Dissolving Solvent | Test Range ( $\mu$ M) | Intermediate Dilution         |
|--------------------|---------------------|--------------------|-----------------------|-------------------------------|
| <i>rac-1a</i>      | 10mM                | DMSO               | 0.0003 - 3            | 10 % DMSO in PDE Assay Buffer |
| <i>(7S,7aR)-1a</i> | 10mM                | DMSO               | 0.001 - 10            | 10 % DMSO in PDE Assay Buffer |
| <i>rac-1b</i>      | 10mM                | DMSO               | 0.001 - 10            | 10 % DMSO in PDE Assay Buffer |
| <i>rac-1c</i>      | 10mM                | DMSO               | 0.001 - 10            | 10 % DMSO in PDE Assay Buffer |
| <i>rac-1d</i>      | 10mM                | DMSO               | 0.0003 - 3            | 10 % DMSO in PDE Assay Buffer |
| <i>rac-1e</i>      | 10mM                | DMSO               | 0.0003 - 3            | 10 % DMSO in PDE Assay Buffer |
| <i>rac-2a</i>      | 10mM                | DMSO               | 0.001 - 10            | 10 % DMSO in PDE Assay Buffer |
| <i>rac-2b</i>      | 10mM                | DMSO               | 0.0003 - 3            | 10 % DMSO in PDE Assay Buffer |
| <i>rac-24b</i>     | 10mM                | DMSO               | 0.0003 - 3            | 10 % DMSO in PDE Assay Buffer |
| Apremilast*        | 10mM                | DMSO               | 0.001 - 10 for PDE4B1 | 10 % DMSO in PDE Assay Buffer |

\*Reference compound.

##### Enzymes and Substrates

| Assay   | BPS Catalog | Enzyme Lot # | Enzyme Used (ng) / Reaction | Substrate       |
|---------|-------------|--------------|-----------------------------|-----------------|
| PDE-4B1 | 60041       | 90520        | 0.05                        | 100 nM FAM-cAMP |

Data for the effect of each compound on PDE4B1 activity is presented below. The IC<sub>50</sub> of all compounds against PDEs are summarized in Table 1 in the manuscript.

Data for the Effect of *rac-1a* on PDE4B1 Activity

| <i>rac-1a</i><br>[ $\mu\text{M}$ ] | PDE Activity<br>[(Fluorescent Polarization (mp))] |         | % Activity |         |
|------------------------------------|---------------------------------------------------|---------|------------|---------|
|                                    | Repeat1                                           | Repeat2 | Repeat1    | Repeat2 |
| No Compound                        | 161                                               | 165     | 99         | 101     |
| 0.0003                             | 159                                               | 163     | 97         | 100     |
| 0.001                              | 150                                               | 155     | 91         | 94      |
| 0.003                              | 141                                               | 140     | 84         | 84      |
| 0.01                               | 109                                               | 112     | 62         | 64      |
| 0.03                               | 74                                                | 74      | 37         | 38      |
| 0.1                                | 44                                                | 45      | 16         | 17      |
| 0.3                                | 28                                                | 30      | 5          | 6       |
| 1                                  | 23                                                | 24      | 2          | 3       |
| 3                                  | 22                                                | 22      | 1          | 1       |
| Background                         | 21                                                | 21      | 0          | 0       |

### PDE4B1 Activity

Substrate Conc.=100nM (cAMP)

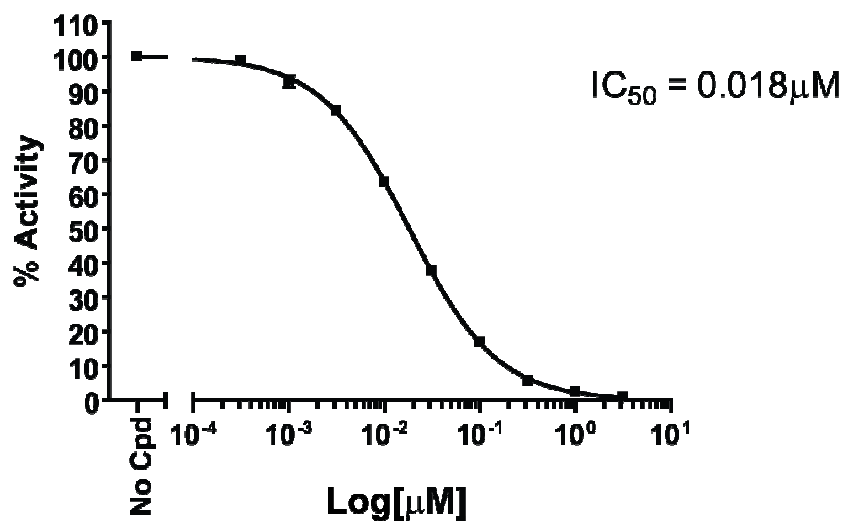

Data for the Effect of (-)-(7S,7aR)-**1a** on PDE4B1 Activity

| (-)-(7S,7aR)- <b>1a</b><br>[ $\mu\text{M}$ ] | PDE Activity<br>[(Fluorescent Polarization (mp))] |         | % Activity |         |
|----------------------------------------------|---------------------------------------------------|---------|------------|---------|
|                                              | Repeat1                                           | Repeat2 | Repeat1    | Repeat2 |
| No Compound                                  | 155                                               | 153     | 101        | 99      |
| 0.001                                        | 149                                               | 148     | 97         | 95      |
| 0.003                                        | 136                                               | 135     | 87         | 86      |
| 0.01                                         | 100                                               | 99      | 60         | 58      |
| 0.03                                         | 72                                                | 70      | 38         | 37      |
| 0.1                                          | 41                                                | 42      | 15         | 16      |
| 0.3                                          | 31                                                | 28      | 7          | 5       |
| 1                                            | 26                                                | 25      | 4          | 3       |
| 3                                            | 25                                                | 26      | 3          | 4       |
| 10                                           | 22                                                | 21      | 1          | -1      |
| Background                                   | 21                                                | 21      |            |         |

### PDE4B1 Activity

Substrate Conc.=100nM (cAMP)

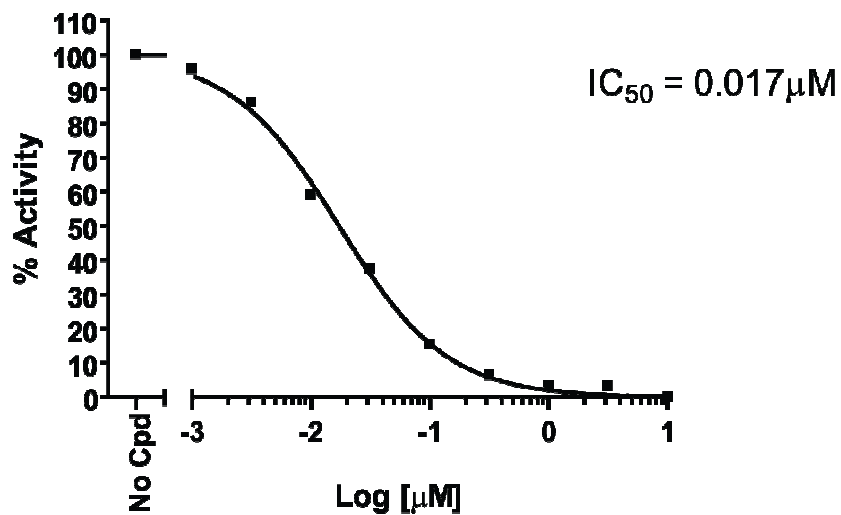

Data for the Effect of *rac-1b* on PDE4B1 Activity

| <i>rac-1b</i><br>[ $\mu\text{M}$ ] | PDE Activity<br>[(Fluorescent Polarization<br>(mp))] |          | % Activity |          |
|------------------------------------|------------------------------------------------------|----------|------------|----------|
|                                    | Repeat 1                                             | Repeat 2 | Repeat 1   | Repeat 2 |
| No Compound                        | 129                                                  | 123      | 103        | 97       |
| 0.001                              | 121                                                  | 131      | 95         | 105      |
| 0.003                              | 128                                                  | 125      | 102        | 99       |
| 0.01                               | 125                                                  | 128      | 99         | 102      |
| 0.03                               | 123                                                  | 130      | 97         | 103      |
| 0.1                                | 124                                                  | 129      | 98         | 103      |
| 0.3                                | 130                                                  | 123      | 103        | 97       |
| 1                                  | 125                                                  | 127      | 99         | 100      |
| 3                                  | 113                                                  | 116      | 87         | 90       |
| 10                                 | 98                                                   | 95       | 73         | 70       |
| Background                         | 22                                                   | 21       |            |          |

### PDE4B1 Activity

Substrate Conc.=100nM (cAMP)

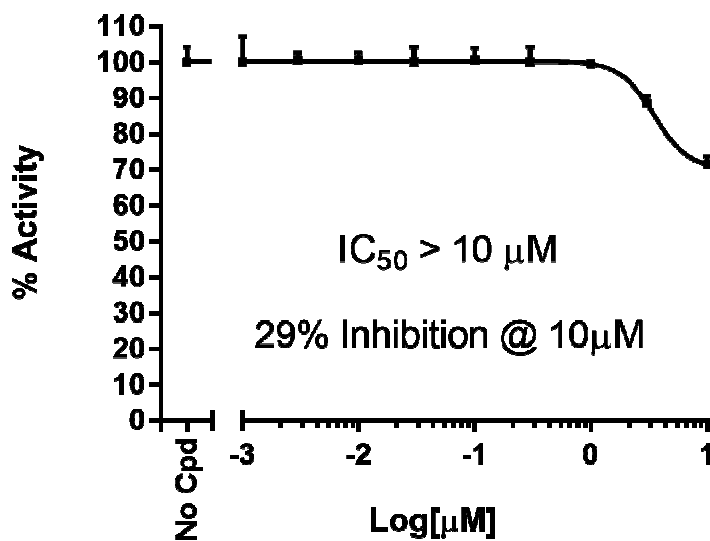

Data for the Effect of *rac-1c* on PDE4B1 Activity

| <i>rac-1c</i><br>[ $\mu\text{M}$ ] | PDE Activity<br>[(Fluorescent Polarization<br>(mp))] |          | % Activity |          |
|------------------------------------|------------------------------------------------------|----------|------------|----------|
|                                    | Repeat 1                                             | Repeat 2 | Repeat 1   | Repeat 2 |
| No Compound                        | 129                                                  | 127      | 101        | 99       |
| 0.001                              | 124                                                  | 122      | 96         | 94       |
| 0.003                              | 127                                                  | 129      | 98         | 101      |
| 0.01                               | 123                                                  | 125      | 95         | 97       |
| 0.03                               | 127                                                  | 126      | 99         | 98       |
| 0.1                                | 128                                                  | 123      | 100        | 95       |
| 0.3                                | 128                                                  | 123      | 99         | 95       |
| 1                                  | 116                                                  | 111      | 88         | 84       |
| 3                                  | 89                                                   | 92       | 63         | 66       |
| 10                                 | 64                                                   | 61       | 40         | 37       |
| Background                         | 21                                                   | 23       |            |          |

### PDE4B1 Activity

Substrate Conc.=100nM (cAMP)

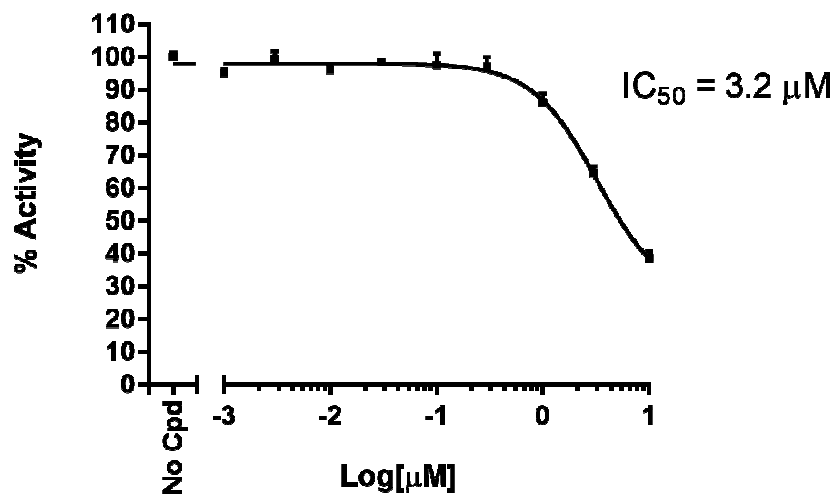



Data for the Effect of *rac-1d* on PDE4B1 Activity

| <i>rac-1d</i><br>[ $\mu$ M] | PDE Activity<br>[(Fluorescent Polarization (mp))] |         | % Activity |         |
|-----------------------------|---------------------------------------------------|---------|------------|---------|
|                             | Repeat1                                           | Repeat2 | Repeat1    | Repeat2 |
| No Compound                 | 166                                               | 165     | 100        | 100     |
| 0.0003                      | 166                                               | 159     | 100        | 96      |
| 0.001                       | 161                                               | 161     | 97         | 97      |
| 0.003                       | 151                                               | 152     | 90         | 91      |
| 0.01                        | 120                                               | 123     | 69         | 70      |
| 0.03                        | 84                                                | 83      | 44         | 43      |
| 0.1                         | 50                                                | 53      | 20         | 22      |
| 0.3                         | 33                                                | 35      | 8          | 9       |
| 1                           | 28                                                | 29      | 5          | 5       |
| 3                           | 25                                                | 24      | 2          | 2       |
| Background                  | 22                                                | 21      | 0          | 0       |

### PDE4B1 Activity

Substrate Conc.=100nM (cAMP)

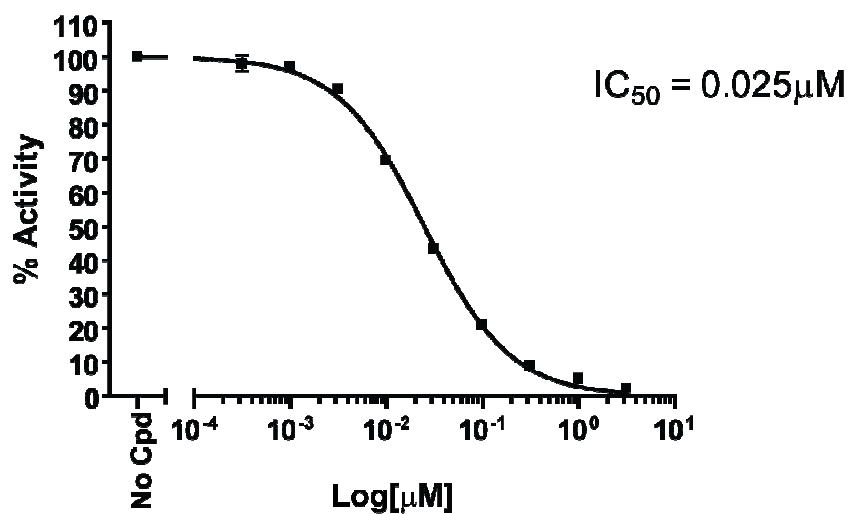

Data for the Effect of *rac-1e* on PDE4B1 Activity

| <i>rac-1e</i><br>[ $\mu\text{M}$ ] | PDE Activity<br>[(Fluorescent Polarization (mp))] |         | % Activity |         |
|------------------------------------|---------------------------------------------------|---------|------------|---------|
|                                    | Repeat1                                           | Repeat2 | Repeat1    | Repeat2 |
| No Compound                        | 163                                               | 162     | 100        | 100     |
| 0.0003                             | 163                                               | 159     | 100        | 97      |
| 0.001                              | 158                                               | 160     | 97         | 98      |
| 0.003                              | 156                                               | 153     | 95         | 94      |
| 0.01                               | 139                                               | 138     | 84         | 83      |
| 0.03                               | 114                                               | 113     | 65         | 65      |
| 0.1                                | 78                                                | 75      | 40         | 38      |
| 0.3                                | 44                                                | 41      | 16         | 14      |
| 1                                  | 29                                                | 29      | 6          | 5       |
| 3                                  | 22                                                | 23      | 0          | 1       |
| Background                         | 21                                                | 22      | 0          | 0       |

### PDE4B1 Activity

Substrate Conc.=100nM (cAMP)

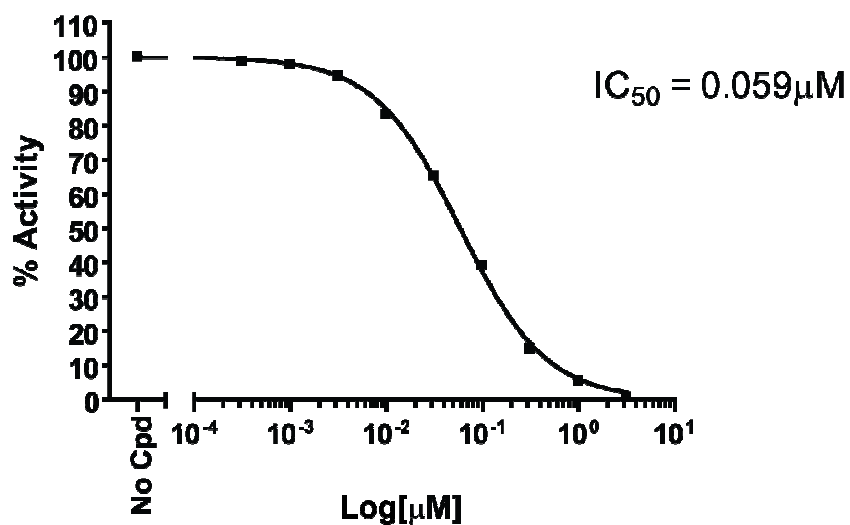

Data for the Effect of *rac-2a* on PDE4B1 Activity

| <i>rac-2a</i><br>[ $\mu\text{M}$ ] | PDE Activity<br>[(Fluorescent Polarization (mp))] |         | % Activity |         |
|------------------------------------|---------------------------------------------------|---------|------------|---------|
|                                    | Repeat1                                           | Repeat2 | Repeat1    | Repeat2 |
| No Compound                        | 162                                               | 157     | 102        | 98      |
| 0.001                              | 156                                               | 152     | 97         | 95      |
| 0.003                              | 147                                               | 141     | 91         | 86      |
| 0.01                               | 122                                               | 127     | 73         | 76      |
| 0.03                               | 100                                               | 96      | 57         | 54      |
| 0.1                                | 67                                                | 69      | 33         | 34      |
| 0.3                                | 36                                                | 42      | 11         | 15      |
| 1                                  | 28                                                | 27      | 5          | 4       |
| 3                                  | 21                                                | 22      | 0          | 1       |
| 10                                 | 22                                                | 23      | 0          | 1       |
| Background                         | 21                                                | 22      |            |         |

### PDE4B1 Activity

Substrate Conc.=100nM (cAMP)

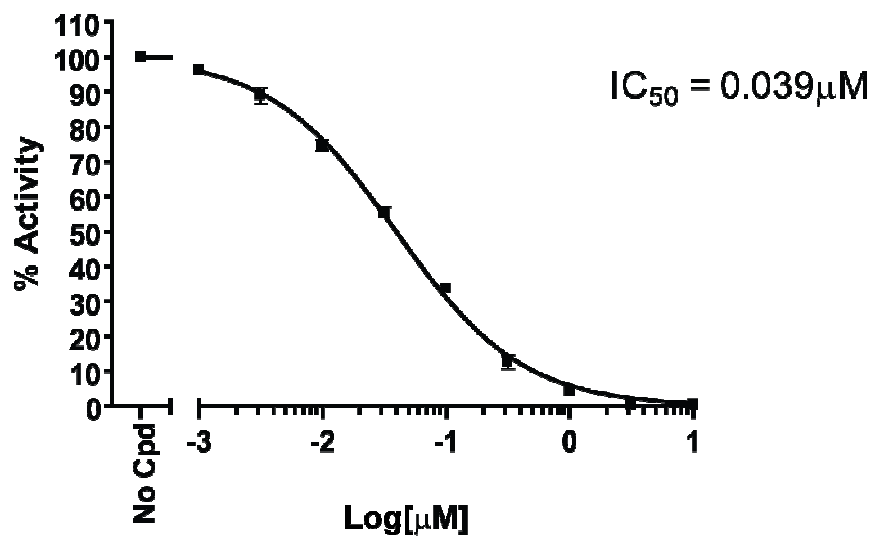

Data for the Effect of *rac-2b* on PDE4B1 Activity

| <i>rac-2b</i><br>[ $\mu\text{M}$ ] | PDE Activity<br>[(Fluorescent Polarization (mp))] |         | % Activity |         |
|------------------------------------|---------------------------------------------------|---------|------------|---------|
|                                    | Repeat1                                           | Repeat2 | Repeat1    | Repeat2 |
| No Compound                        | 165                                               | 168     | 99         | 101     |
| 0.0003                             | 165                                               | 163     | 99         | 98      |
| 0.001                              | 164                                               | 167     | 98         | 100     |
| 0.003                              | 163                                               | 163     | 97         | 97      |
| 0.01                               | 163                                               | 161     | 98         | 96      |
| 0.03                               | 162                                               | 163     | 97         | 98      |
| 0.1                                | 154                                               | 155     | 92         | 92      |
| 0.3                                | 126                                               | 130     | 72         | 75      |
| 1                                  | 98                                                | 98      | 53         | 53      |
| 3                                  | 56                                                | 59      | 24         | 26      |
| Background                         | 21                                                | 23      | -1         | 1       |

### PDE4B1 Activity

Substrate Conc.=100nM (cAMP)

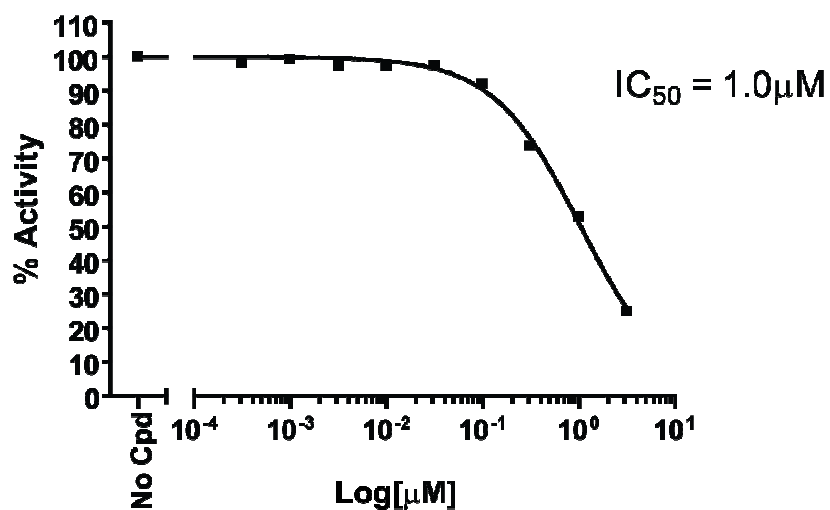

Data for the Effect of *rac-3b* on PDE4B1 Activity

| <i>rac-3b</i><br>[ $\mu\text{M}$ ] | PDE Activity<br>[(Fluorescent Polarization (mp))] |         | % Activity |         |
|------------------------------------|---------------------------------------------------|---------|------------|---------|
|                                    | Repeat1                                           | Repeat2 | Repeat1    | Repeat2 |
| No Compound                        | 156                                               | 152     | 102        | 98      |
| 0.001                              | 157                                               | 152     | 102        | 98      |
| 0.003                              | 151                                               | 154     | 98         | 100     |
| 0.01                               | 154                                               | 151     | 100        | 98      |
| 0.03                               | 154                                               | 153     | 100        | 99      |
| 0.1                                | 152                                               | 153     | 98         | 99      |
| 0.3                                | 148                                               | 153     | 96         | 100     |
| 1                                  | 150                                               | 147     | 97         | 95      |
| 3                                  | 146                                               | 137     | 94         | 87      |
| 10                                 | 132                                               | 126     | 83         | 79      |
| Background                         | 20                                                | 21      |            |         |

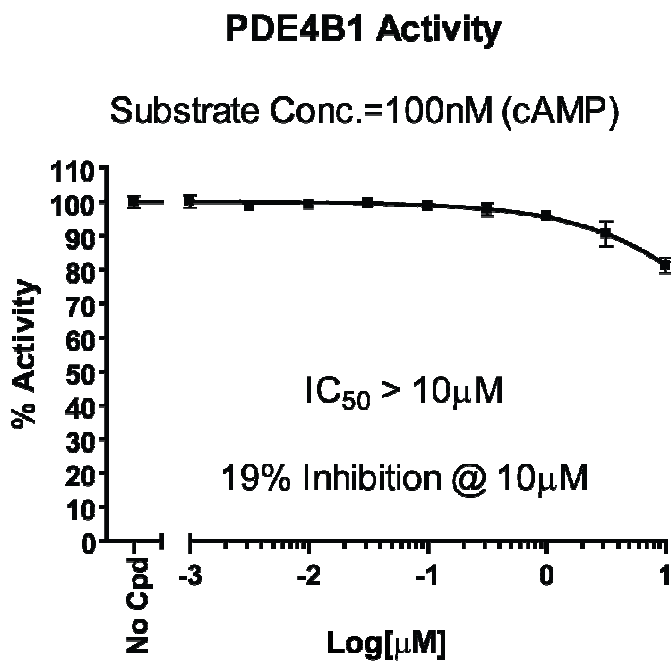

## *In vitro* selectivity enzymatic assay for a series of PDE4 isotypes

### Compounds

| Compound I.D.                         | Stock Concentration | Dissolving Solvent | Test Range ( $\mu$ M) | Intermediate Dilution         |
|---------------------------------------|---------------------|--------------------|-----------------------|-------------------------------|
| (7 <i>S</i> ,7 <i>aR</i> )- <b>1a</b> | 10mM                | DMSO               | 0.1                   | 10 % DMSO in PDE Assay Buffer |
| <i>rac</i> - <b>1d</b>                | 10mM                | DMSO               | 0.1                   | 10 % DMSO in PDE Assay Buffer |
| <i>rac</i> - <b>1e</b>                | 10mM                | DMSO               | 0.1                   | 10 % DMSO in PDE Assay Buffer |
| <i>rac</i> - <b>2a</b>                | 10mM                | DMSO               | 0.1                   | 10 % DMSO in PDE Assay Buffer |
| Apremilast*                           | 10mM                | DMSO               | 10                    | 10 % DMSO in PDE Assay Buffer |

\*Reference compound.

### Enzymes and Substrates

| Assay   | Catalog # | Enzyme Lot # | Enzyme Used (ng) / Reaction | Substrate       |
|---------|-----------|--------------|-----------------------------|-----------------|
| PDE4A1A | 60040     | 160926-G     | 0.1                         | 100 nM FAM-cAMP |
| PDE4A4B | 60039     | 110411       | 0.06                        | 100 nM FAM-cAMP |
| PDE4A10 | 60038     | 110428-GC    | 0.128                       | 100 nM FAM-cAMP |
| PDE4B2  | 60042     | 121218-G1    | 0.025                       | 100 nM FAM-cAMP |
| PDE4C1  | 60044     | 90812        | 0.24                        | 100 nM FAM-cAMP |
| PDE4D2  | 60048     | 130102-GC    | 0.03                        | 100 nM FAM-cAMP |
| PDE4D3  | 60046     | 121011       | 0.025                       | 100 nM FAM-cAMP |
| PDE4D7  | 60047     | 101101       | 0.045                       | 100 nM FAM-cAMP |

The values of percentage activity were plotted on a bar graph below.

## PDE4A1A

Data for the Effect of the Compounds on PDE4A1A Activity

| Compounds                            | PDE4A1A Activity<br>[Fluorescent Polarization (mp)] |          | % Activity |          |
|--------------------------------------|-----------------------------------------------------|----------|------------|----------|
|                                      | Repeat 1                                            | Repeat 2 | Repeat 1   | Repeat 2 |
| No Compound                          | 107                                                 | 101      | 104        | 96       |
| (7S,7aR)- <b>CMPI</b> , 0.1 $\mu$ M  | 29                                                  | 30       | 10         | 11       |
| <i>rac</i> - <b>1e</b> , 0.1 $\mu$ M | 46                                                  | 44       | 30         | 28       |
| <i>rac</i> - <b>1d</b> , 0.1 $\mu$ M | 30                                                  | 32       | 11         | 13       |
| Apremilast, 0.001 $\mu$ M            | 89                                                  | 90       | 82         | 83       |
| Apremilast, 0.01 $\mu$ M             | 58                                                  | 61       | 45         | 48       |
| Apremilast, 0.1 $\mu$ M              | 27                                                  | 30       | 7          | 11       |
| Blank                                | 20                                                  | 22       |            |          |

| Compound<br>0.1 $\mu$ M | PDE Activity<br>[(Fluorescent Polarization<br>(mp)] |         | % Activity |         |
|-------------------------|-----------------------------------------------------|---------|------------|---------|
|                         | Repeat1                                             | Repeat2 | Repeat1    | Repeat2 |
| No Compound             | 162                                                 | 163     | 100        | 100     |
| <i>rac</i> - <b>2a</b>  | 94                                                  | 92      | 52         | 50      |
| (7S,7aR)- <b>1a</b>     | 59                                                  | 56      | 27         | 25      |
| Apremilast, 10 $\mu$ M  | 23                                                  | 22      | 2          | 1       |
| Background              | 20                                                  | 21      |            |         |

### PDE4A1A Activity

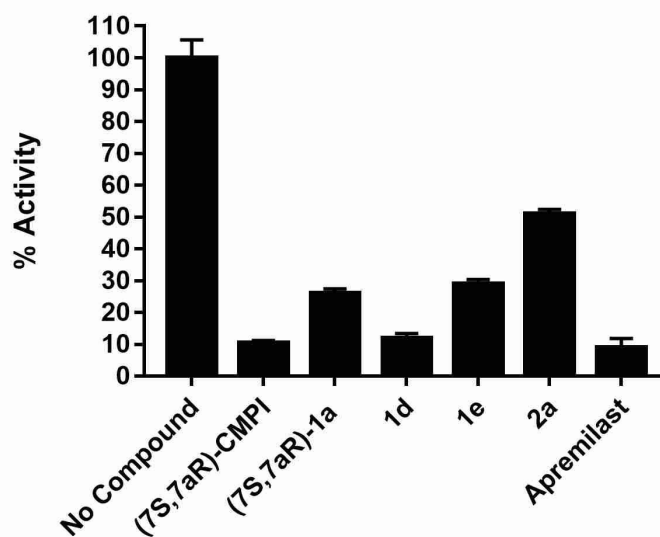

## PDE4A4B

Data for the Effect of the Compounds on PDE4A4B Activity

| Compounds                            | PDE4A4B Activity<br>[Fluorescent Polarization (mp)] |          | % Activity |          |
|--------------------------------------|-----------------------------------------------------|----------|------------|----------|
|                                      | Repeat 1                                            | Repeat 2 | Repeat 1   | Repeat 2 |
| No Compound                          | 150                                                 | 151      | 100        | 100      |
| (7S,7aR)- <b>CMPI</b> , 0.1 $\mu$ M  | 46                                                  | 46       | 20         | 19       |
| <i>rac</i> - <b>1e</b> , 0.1 $\mu$ M | 65                                                  | 65       | 34         | 34       |
| <i>rac</i> - <b>1d</b> , 0.1 $\mu$ M | 43                                                  | 42       | 17         | 16       |
| Apremilast, 0.001 $\mu$ M            | 129                                                 | 138      | 84         | 90       |
| Apremilast, 0.01 $\mu$ M             | 80                                                  | 84       | 46         | 49       |
| Apremilast, 0.1 $\mu$ M              | 31                                                  | 32       | 8          | 8        |
| Blank                                | 20                                                  | 21       |            |          |

| Compound<br>0.1 $\mu$ M | PDE Activity<br>[(Fluorescent Polarization<br>(mp)] |         | % Activity |         |
|-------------------------|-----------------------------------------------------|---------|------------|---------|
|                         | Repeat1                                             | Repeat2 | Repeat1    | Repeat2 |
| No Compound             | 164                                                 | 170     | 98         | 102     |
| <i>rac</i> - <b>2a</b>  | 99                                                  | 97      | 54         | 53      |
| (7S,7aR)- <b>1a</b>     | 58                                                  | 60      | 25         | 27      |
| Apremilast, 10 $\mu$ M  | 22                                                  | 23      | 1          | 2       |
| Background              | 20                                                  | 21      |            |         |

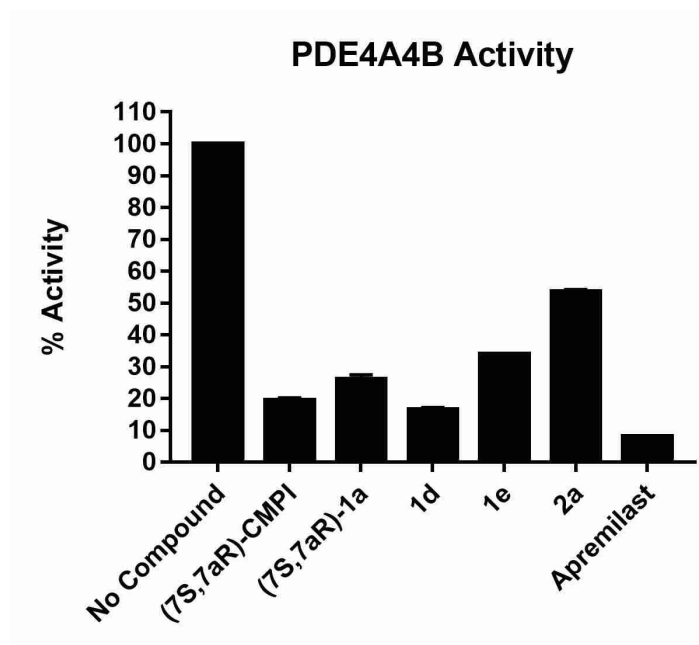



## PDE4A10

Data for the Effect of the Compounds on PDE4A10 Activity

| Compounds                            | PDE4A10 Activity<br>[Fluorescent Polarization (mp)] |          | % Activity |          |
|--------------------------------------|-----------------------------------------------------|----------|------------|----------|
|                                      | Repeat 1                                            | Repeat 2 | Repeat 1   | Repeat 2 |
| No Compound                          | 136                                                 | 138      | 100        | 100      |
| (7S,7aR)-CMPI, 0.1 $\mu$ M           | 46                                                  | 40       | 21         | 15       |
| <i>rac</i> - <b>1e</b> , 0.1 $\mu$ M | 62                                                  | 63       | 34         | 35       |
| <i>rac</i> - <b>1d</b> , 0.1 $\mu$ M | 35                                                  | 34       | 11         | 10       |
| Apremilast, 0.001 $\mu$ M            | 124                                                 | 124      | 88         | 89       |
| Apremilast, 0.01 $\mu$ M             | 75                                                  | 71       | 46         | 42       |
| Apremilast, 0.1 $\mu$ M              | 38                                                  | 36       | 13         | 11       |
| Blank                                | 22                                                  | 23       |            |          |

| Compound<br>0.1 $\mu$ M | PDE Activity<br>[(Fluorescent Polarization<br>(mp)] |         | % Activity |         |
|-------------------------|-----------------------------------------------------|---------|------------|---------|
|                         | Repeat1                                             | Repeat2 | Repeat1    | Repeat2 |
| No Compound             | 106                                                 | 100     | 103        | 97      |
| <i>rac</i> - <b>2a</b>  | 58                                                  | 54      | 46         | 41      |
| (7S,7aR)- <b>1a</b>     | 41                                                  | 40      | 25         | 24      |
| Apremilast, 10 $\mu$ M  | 22                                                  | 23      | 2          | 3       |
| Background              | 20                                                  | 21      |            |         |

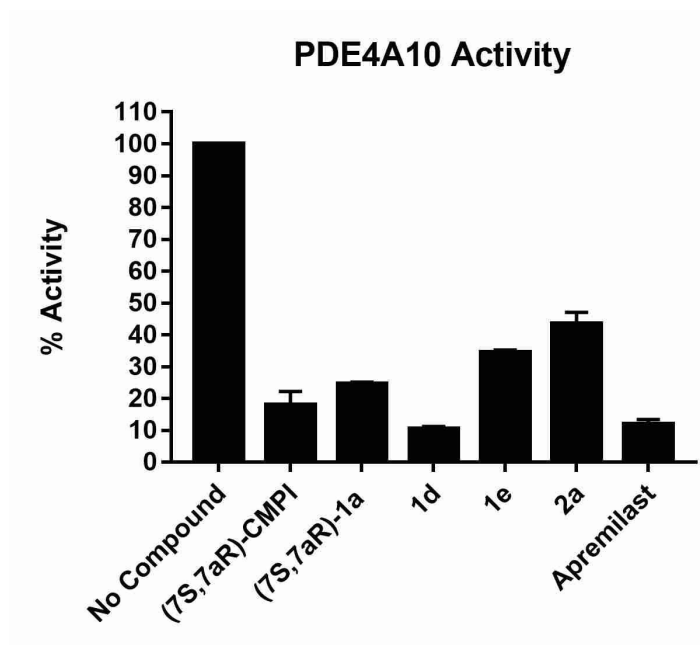

## PDE4B2

Data for the Effect of the Compounds on PDE4B2 Activity

| Compounds                            | PDE4B2 Activity<br>[Fluorescent Polarization (mp)] |          | % Activity |          |
|--------------------------------------|----------------------------------------------------|----------|------------|----------|
|                                      | Repeat 1                                           | Repeat 2 | Repeat 1   | Repeat 2 |
| No Compound                          | 138                                                | 138      | 100        | 100      |
| (7S,7aR)- <b>CMPI</b> , 0.1 $\mu$ M  | 37                                                 | 36       | 12         | 12       |
| <i>rac</i> - <b>1e</b> , 0.1 $\mu$ M | 54                                                 | 51       | 27         | 25       |
| <i>rac</i> - <b>1d</b> , 0.1 $\mu$ M | 30                                                 | 32       | 7          | 8        |
| Apremilast, 0.001 $\mu$ M            | 122                                                | 119      | 86         | 84       |
| Apremilast, 0.01 $\mu$ M             | 78                                                 | 78       | 48         | 48       |
| Apremilast, 0.1 $\mu$ M              | 33                                                 | 34       | 9          | 10       |
| Blank                                | 22                                                 | 23       |            |          |

| Compound<br>0.1 $\mu$ M | PDE Activity<br>[(Fluorescent Polarization<br>(mp)] |         | % Activity |         |
|-------------------------|-----------------------------------------------------|---------|------------|---------|
|                         | Repeat1                                             | Repeat2 | Repeat1    | Repeat2 |
| No Compound             | 113                                                 | 109     | 102        | 98      |
| <i>rac</i> - <b>2a</b>  | 48                                                  | 50      | 31         | 32      |
| (7S,7aR)- <b>1a</b>     | 29                                                  | 32      | 10         | 13      |
| Apremilast, 10 $\mu$ M  | 22                                                  | 20      | 2          | 0       |
| Background              | 20                                                  | 21      |            |         |

### PDE4B2 Activity

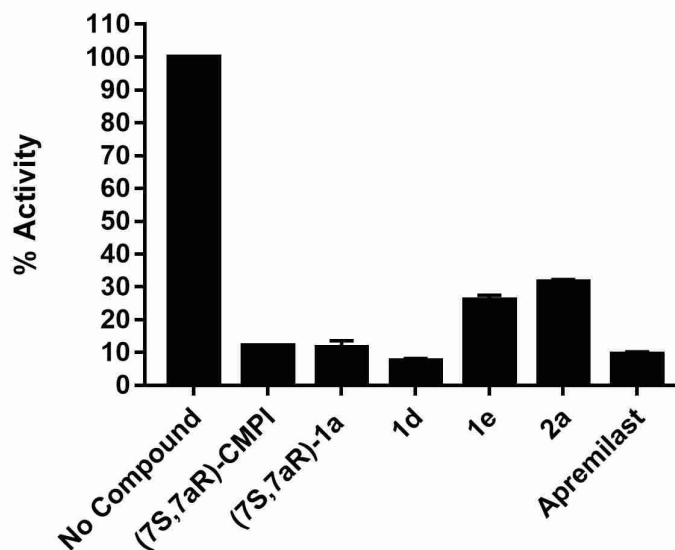

## PDE4C1

Data for the Effect of the Compounds on PDE4C1 Activity

| Compounds                            | PDE4C1 Activity<br>[Fluorescent Polarization (mp)] |          | % Activity |          |
|--------------------------------------|----------------------------------------------------|----------|------------|----------|
|                                      | Repeat 1                                           | Repeat 2 | Repeat 1   | Repeat 2 |
| No Compound                          | 146                                                | 139      | 103        | 97       |
| (7S,7aR)- <b>CMPI</b> , 0.1 $\mu$ M  | 98                                                 | 100      | 63         | 65       |
| <i>rac</i> - <b>1e</b> , 0.1 $\mu$ M | 122                                                | 117      | 84         | 79       |
| <i>rac</i> - <b>1d</b> , 0.1 $\mu$ M | 102                                                | 102      | 67         | 67       |
| Apremilast, 0.001 $\mu$ M            | 136                                                | 133      | 95         | 92       |
| Apremilast, 0.01 $\mu$ M             | 100                                                | 104      | 65         | 68       |
| Apremilast, 0.1 $\mu$ M              | 49                                                 | 51       | 23         | 25       |
| Blank                                | 19                                                 | 21       |            |          |

| Compound<br>0.1 $\mu$ M | PDE Activity<br>[(Fluorescent Polarization<br>(mp)] |         | % Activity |         |
|-------------------------|-----------------------------------------------------|---------|------------|---------|
|                         | Repeat1                                             | Repeat2 | Repeat1    | Repeat2 |
| No Compound             | 164                                                 | 165     | 100        | 100     |
| <i>rac</i> - <b>2a</b>  | 157                                                 | 155     | 95         | 93      |
| (7S,7aR)- <b>1a</b>     | 141                                                 | 138     | 84         | 82      |
| Apremilast, 10 $\mu$ M  | 24                                                  | 21      | 3          | 1       |
| Background              | 20                                                  | 21      |            |         |

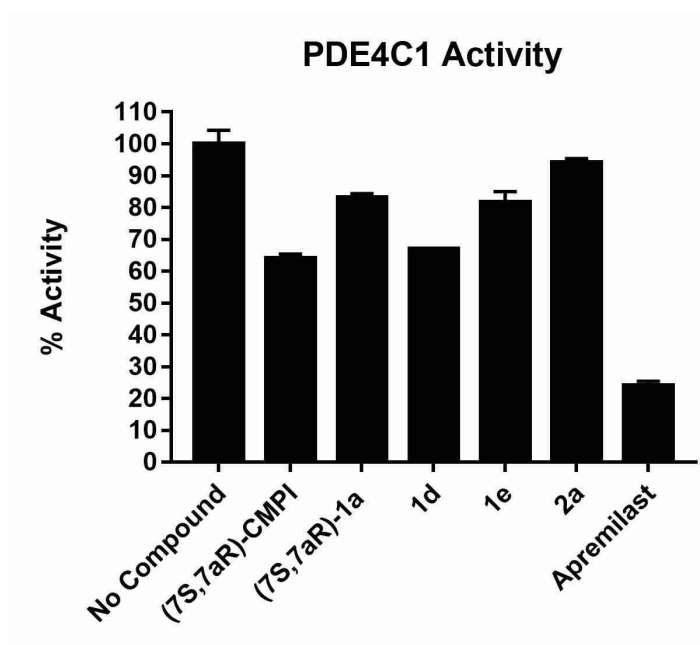

**PDE4D2**

| Compounds                            | PDE4D2 Activity<br>[Fluorescent Polarization (mp)] |          | % Activity |          |
|--------------------------------------|----------------------------------------------------|----------|------------|----------|
|                                      | Repeat 1                                           | Repeat 2 | Repeat 1   | Repeat 2 |
| No Compound                          | 103                                                | 105      | 98         | 102      |
| (7S,7aR)- <b>CMPI</b> , 0.1 $\mu$ M  | 35                                                 | 36       | 16         | 17       |
| <i>rac</i> - <b>1e</b> , 0.1 $\mu$ M | 45                                                 | 42       | 28         | 24       |
| <i>rac</i> - <b>1d</b> , 0.1 $\mu$ M | 28                                                 | 30       | 8          | 9        |
| Apremilast, 0.001 $\mu$ M            | 91                                                 | 93       | 84         | 87       |
| Apremilast, 0.01 $\mu$ M             | 59                                                 | 59       | 45         | 46       |
| Apremilast, 0.1 $\mu$ M              | 31                                                 | 30       | 11         | 9        |
| Blank                                | 22                                                 | 22       |            |          |

| Compound<br>0.1 $\mu$ M | PDE Activity<br>[(Fluorescent Polarization<br>(mp)] |         | % Activity |         |
|-------------------------|-----------------------------------------------------|---------|------------|---------|
|                         | Repeat1                                             | Repeat2 | Repeat1    | Repeat2 |
| No Compound             | 160                                                 | 157     | 101        | 99      |
| <i>rac</i> - <b>2a</b>  | 108                                                 | 107     | 64         | 63      |
| (7S,7aR)- <b>1a</b>     | 74                                                  | 72      | 39         | 37      |
| Apremilast, 10 $\mu$ M  | 24                                                  | 22      | 3          | 1       |
| Background              | 20                                                  | 21      |            |         |

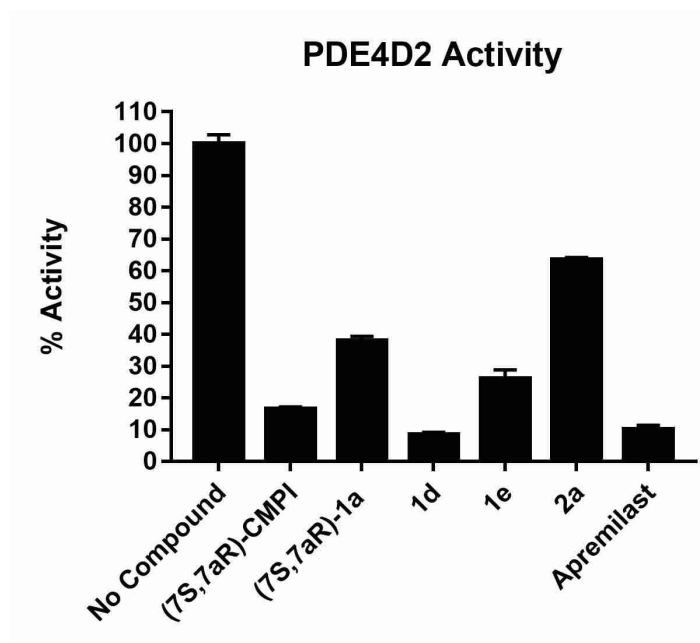

### PDE4D3

Data for the Effect of the Compounds on PDE4D3 Activity

| Compounds                            | PDE4D3 Activity<br>[Fluorescent Polarization (mp)] |          | % Activity |          |
|--------------------------------------|----------------------------------------------------|----------|------------|----------|
|                                      | Repeat 1                                           | Repeat 2 | Repeat 1   | Repeat 2 |
| No Compound                          | 126                                                | 124      | 101        | 99       |
| (7S,7aR)- <b>CMPI</b> , 0.1 $\mu$ M  | 37                                                 | 35       | 15         | 14       |
| <i>rac</i> - <b>1e</b> , 0.1 $\mu$ M | 51                                                 | 55       | 29         | 32       |
| <i>rac</i> - <b>1d</b> , 0.1 $\mu$ M | 25                                                 | 27       | 4          | 6        |
| Apremilast, 0.001 $\mu$ M            | 112                                                | 116      | 88         | 91       |
| Apremilast, 0.01 $\mu$ M             | 70                                                 | 67       | 47         | 44       |
| Apremilast, 0.1 $\mu$ M              | 30                                                 | 26       | 9          | 4        |
| Blank                                | 21                                                 | 22       |            |          |

| Compound<br>0.1 $\mu$ M | PDE Activity<br>[(Fluorescent Polarization<br>(mp)] |         | % Activity |         |
|-------------------------|-----------------------------------------------------|---------|------------|---------|
|                         | Repeat1                                             | Repeat2 | Repeat1    | Repeat2 |
| No Compound             | 159                                                 | 158     | 100        | 100     |
| <i>rac</i> - <b>2a</b>  | 111                                                 | 112     | 65         | 66      |
| (7S,7aR)- <b>1a</b>     | 71                                                  | 69      | 37         | 35      |
| Apremilast, 10 $\mu$ M  | 21                                                  | 23      | 1          | 2       |
| Background              | 20                                                  | 21      |            |         |

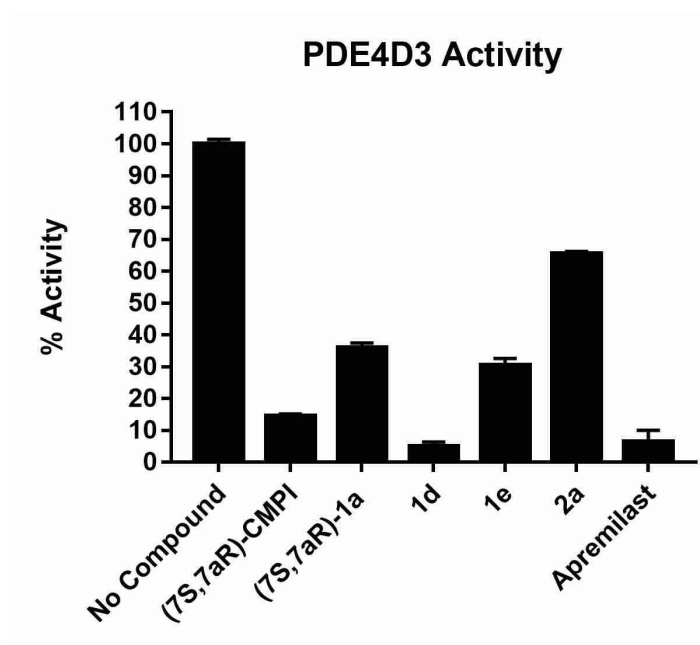

## PDE4D7

Data for the Effect of the Compounds on PDE4D7 Activity

| Compounds                            | PDE4D7 Activity<br>[Fluorescent Polarization (mp)] |          | % Activity |          |
|--------------------------------------|----------------------------------------------------|----------|------------|----------|
|                                      | Repeat 1                                           | Repeat 2 | Repeat 1   | Repeat 2 |
| No Compound                          | 103                                                | 102      | 101        | 99       |
| (7S,7aR)- <b>CMPI</b> , 0.1 $\mu$ M  | 32                                                 | 33       | 14         | 15       |
| <i>rac</i> - <b>1e</b> , 0.1 $\mu$ M | 45                                                 | 47       | 30         | 32       |
| <i>rac</i> - <b>1d</b> , 0.1 $\mu$ M | 29                                                 | 26       | 9          | 7        |
| Apremilast, 0.001 $\mu$ M            | 88                                                 | 89       | 82         | 83       |
| Apremilast, 0.01 $\mu$ M             | 56                                                 | 55       | 43         | 42       |
| Apremilast, 0.1 $\mu$ M              | 25                                                 | 23       | 5          | 2        |
| Blank                                | 21                                                 | 21       |            |          |

| Compound<br>0.1 $\mu$ M | PDE Activity<br>[(Fluorescent Polarization<br>(mp)] |         | % Activity |         |
|-------------------------|-----------------------------------------------------|---------|------------|---------|
|                         | Repeat1                                             | Repeat2 | Repeat1    | Repeat2 |
| No Compound             | 140                                                 | 139     | 101        | 99      |
| <b>2a</b>               | 71                                                  | 75      | 43         | 45      |
| (7S,7aR)- <b>1a</b>     | 45                                                  | 44      | 21         | 20      |
| Apremilast, 10 $\mu$ M  | 22                                                  | 22      | 1          | 1       |
| Background              | 20                                                  | 21      |            |         |

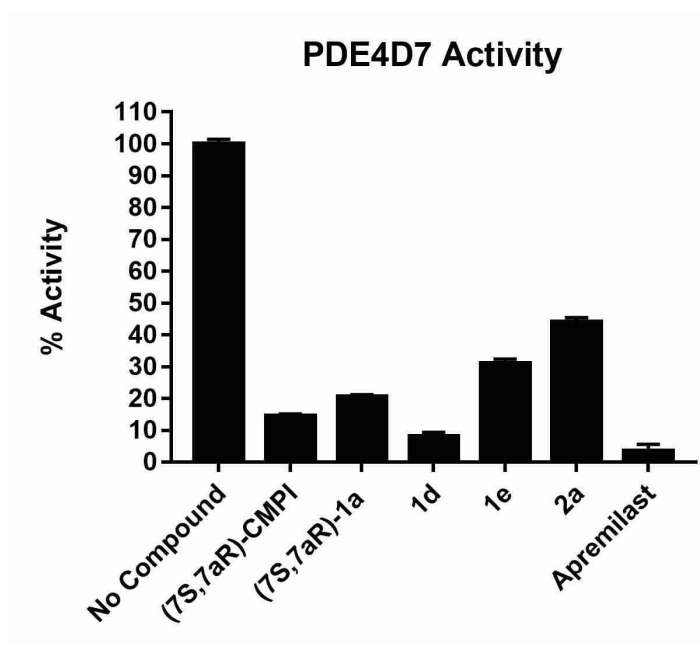

## PDE4B Cell Signaling Pathway Assay

### Compounds

| Compound I.D.          | Dissolving Solvent | Stock Concentration | Test Range (uM) | Intermediate Dilution     |
|------------------------|--------------------|---------------------|-----------------|---------------------------|
| (7S,7aR)- <b>1a</b>    | DMSO               | 10 mM               | 10-0.0002       | 0.1% DMSO in assay medium |
| <i>rac</i> - <b>2a</b> | DMSO               | 10 mM               | 10-0.0002       | 0.1% DMSO in assay medium |
| Apremilast             | DMSO               | 10 mM               | 10-0.0002       | 0.1% DMSO in assay medium |

Apremilast, an inhibitor for the PDE4 signaling pathway, was used as a positive control.

Data for the effect of each compound on PDE4B activity is presented below.

Raw Data for the Effect of (7S,7aR)-1a on PDE4B activity

| (7S,7aR)-1a<br>( $\mu$ M) | Luminescence intensity |         |         | Fold Induction |         |         |
|---------------------------|------------------------|---------|---------|----------------|---------|---------|
|                           | Repeat1                | Repeat2 | Repeat3 | Repeat1        | Repeat2 | Repeat3 |
| No Cpd                    | 2262                   | 2782    | 3447    | 0.8            | 0.9     | 1.2     |
| 0.0002                    | 1199                   | 1622    | 1334    | 0.4            | 0.5     | 0.4     |
| 0.0005                    | 1693                   | 1662    | 1998    | 0.6            | 0.5     | 0.7     |
| 0.002                     | 1035                   | 1627    | 1552    | 0.3            | 0.5     | 0.5     |
| 0.005                     | 1562                   | 1992    | 1754    | 0.5            | 0.7     | 0.6     |
| 0.013                     | 1513                   | 2408    | 2084    | 0.5            | 0.8     | 0.7     |
| 0.04                      | 1959                   | 3254    | 2544    | 0.6            | 1.1     | 0.9     |
| 0.12                      | 2987                   | 3617    | 4095    | 1.0            | 1.2     | 1.4     |
| 0.4                       | 4465                   | 5193    | 5279    | 1.5            | 1.8     | 1.8     |
| 1.1                       | 5064                   | 8562    | 7884    | 1.7            | 3.0     | 2.7     |
| 3.3                       | 9818                   | 15846   | 14956   | 3.4            | 5.6     | 5.2     |
| 10                        | 13511                  | 18308   | 11673   | 4.7            | 6.4     | 4.1     |
| Background                | 98                     | 167     | 120     |                |         |         |

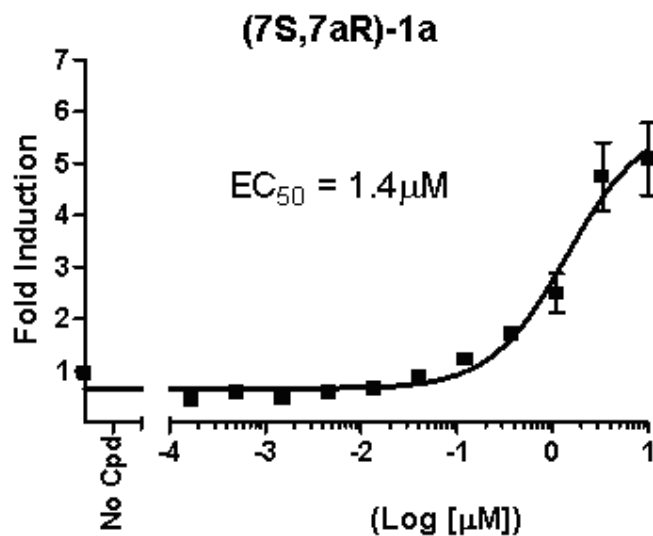



### Raw Data for the Effect of *rac-2a* on PDE4B activity

| <i>rac-2a</i><br>( $\mu\text{M}$ ) | Luminescence intensity |         |         | Fold Induction |         |         |
|------------------------------------|------------------------|---------|---------|----------------|---------|---------|
|                                    | Repeat1                | Repeat2 | Repeat3 | Repeat1        | Repeat2 | Repeat3 |
| No Cpd                             | 2575                   | 1919    | 2184    | 1.1            | 0.8     | 0.9     |
| 0.0002                             | 1643                   | 1214    | 1636    | 0.7            | 0.5     | 0.7     |
| 0.0005                             | 1723                   | 2085    | 1860    | 0.7            | 0.9     | 0.8     |
| 0.002                              | 1856                   | 1896    | 2451    | 0.8            | 0.8     | 1.0     |
| 0.005                              | 1885                   | 1624    | 2291    | 0.8            | 0.7     | 1.0     |
| 0.013                              | 1885                   | 1643    | 1674    | 0.8            | 0.7     | 0.7     |
| 0.04                               | 1703                   | 1717    | 2504    | 0.7            | 0.7     | 1.1     |
| 0.12                               | 2642                   | 2794    | 2924    | 1.1            | 1.2     | 1.3     |
| 0.4                                | 3779                   | 2779    | 3383    | 1.6            | 1.2     | 1.5     |
| 1.1                                | 5711                   | 4684    | 4211    | 2.5            | 2.0     | 1.8     |
| 3.3                                | 9901                   | 8709    | 9890    | 4.4            | 3.9     | 4.4     |
| 10                                 | 18938                  | 16405   | 15746   | 8.5            | 7.3     | 7.0     |
| Background                         | 98                     | 167     | 120     |                |         |         |

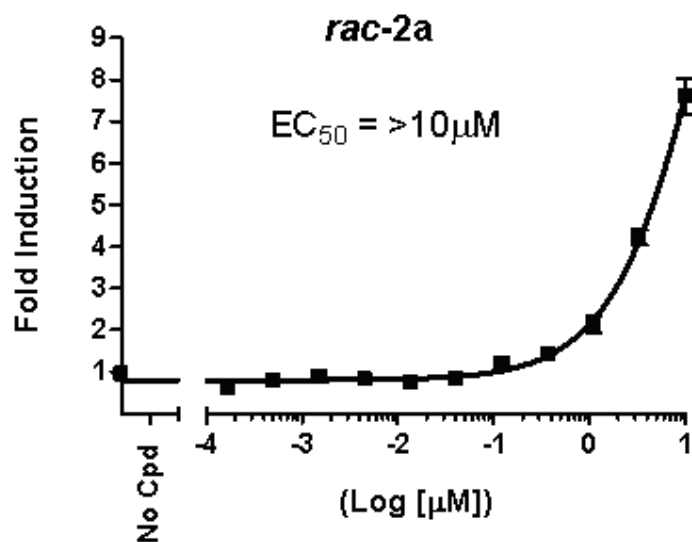

### Raw Data for the Effect of Apremilast on PDE4B activity

| Apremilast<br>(uM) | Luminescence intensity |         |         | Fold Induction |         |         |
|--------------------|------------------------|---------|---------|----------------|---------|---------|
|                    | Repeat1                | Repeat2 | Repeat3 | Repeat1        | Repeat2 | Repeat3 |
| No Cpd             | 1700                   | 2115    | 2286    | 0.8            | 1.0     | 1.1     |
| 0.0002             | 1338                   | 1172    | 2039    | 0.6            | 0.6     | 1.0     |
| 0.0005             | 1364                   | 1253    | 1440    | 0.6            | 0.6     | 0.7     |
| 0.002              | 1325                   | 1276    | 1996    | 0.6            | 0.6     | 0.9     |
| 0.005              | 1334                   | 1691    | 1164    | 0.6            | 0.8     | 0.6     |
| 0.013              | 1696                   | 1077    | 1966    | 0.8            | 0.5     | 0.9     |
| 0.04               | 1699                   | 1540    | 1895    | 0.8            | 0.7     | 0.9     |
| 0.12               | 2047                   | 2583    | 2497    | 1.0            | 1.2     | 1.2     |
| 0.4                | 3233                   | 3061    | 3451    | 1.5            | 1.5     | 1.6     |
| 1.1                | 3520                   | 4120    | 3984    | 1.7            | 2.0     | 1.9     |
| 3.3                | 5346                   | 5206    | 9264*   | 2.5            | 2.5     |         |
| 10                 | 6698                   | 6646    | 11983*  | 3.2            | 3.2     |         |
| Background         | 131                    | 44      | 92      |                |         |         |

\* Data points were excluded from the analysis

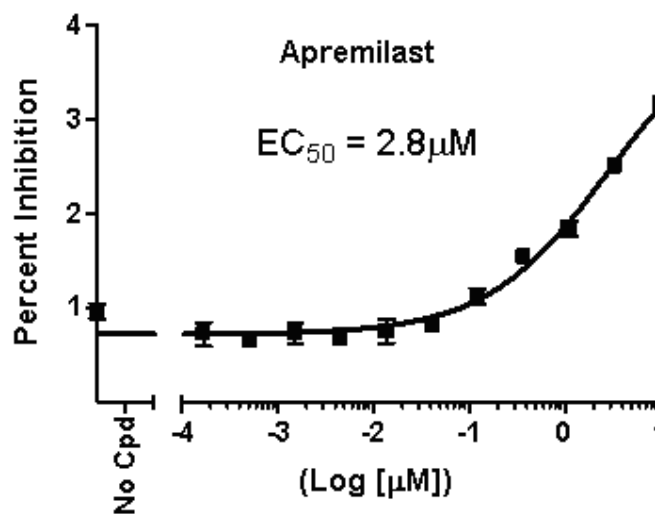

## 4. Quantum-chemical calculations

Complex [CX-1]<sup>+</sup>

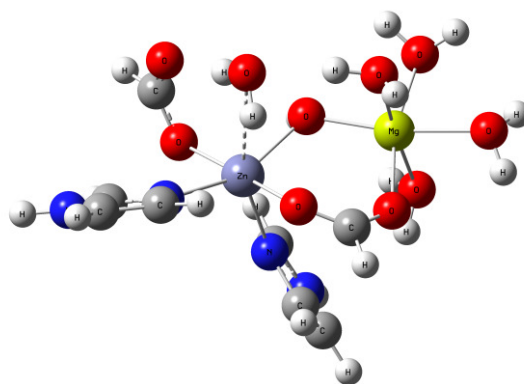

|   |             |             |             |
|---|-------------|-------------|-------------|
| O | 0.60960300  | -0.03691100 | -0.50793100 |
| O | 0.41341500  | 0.15396400  | 2.51880300  |
| H | 1.36768500  | -0.01513700 | 2.47508400  |
| H | 1.32643700  | -0.64253500 | -0.76434300 |
| H | -1.10968000 | -2.25282100 | 3.28998900  |
| H | -1.94568300 | 1.26415300  | 1.72104800  |
| O | -3.09263700 | -4.27688800 | 1.61476800  |
| O | 0.97754900  | -2.29755700 | 1.25947000  |
| C | 0.94301200  | -3.55704900 | 1.33660100  |
| O | -1.85817800 | -1.95538800 | -0.24902800 |
| H | 1.85566800  | -4.05090100 | 1.75796100  |
| O | -1.91483200 | 0.73261100  | 0.91037400  |
| O | -1.71379900 | -1.87037500 | 2.63426700  |
| O | -0.00200800 | -4.30906100 | 0.99140700  |
| O | -2.76756800 | -3.59589200 | -2.57988400 |
| H | -4.74622100 | -3.61868400 | -3.01519900 |
| H | -3.40608800 | -4.10561500 | 0.70353200  |
| N | 0.31527200  | -3.16441400 | -2.16019600 |
| C | 0.11487200  | -2.23239900 | -3.08536600 |
| C | 1.68721500  | -3.25598100 | -1.99724200 |
| N | -1.58489100 | -5.95420600 | -0.94660000 |
| C | -1.41971100 | -6.91616000 | 0.03975400  |
| C | -2.15664900 | -6.57684300 | -1.97324900 |
| C | -3.97064000 | -3.75231100 | -2.21338900 |
| H | 1.40303900  | -1.02603200 | -4.24601800 |
| N | -2.35033800 | -7.88152000 | -1.69244800 |
| H | -1.94692800 | -9.10518100 | 0.04146200  |
| O | -4.37464700 | -4.03738900 | -1.06217300 |
| H | -2.76356500 | -8.56532300 | -2.32182900 |
| C | -1.89148900 | -8.12069700 | -0.41349100 |
| H | -0.97529000 | -6.67353400 | 1.00146800  |
| H | -2.43291000 | -6.12341500 | -2.92225600 |
| H | -0.85365300 | -1.89474600 | -3.45104900 |
| H | 3.35532400  | -2.15490400 | -3.03974600 |
| C | 2.30949700  | -2.37850100 | -2.84993400 |
| H | 2.12967100  | -3.95375200 | -1.28810300 |

|    |             |             |             |
|----|-------------|-------------|-------------|
| N  | 1.29176000  | -1.74450900 | -3.53444000 |
| Mg | -0.62043200 | -0.98390700 | 1.00810500  |
| Zn | -1.32864400 | -3.81506700 | -0.86662500 |
| H  | 0.33553700  | 1.11708400  | 2.43618500  |
| H  | -2.82972800 | 0.43698500  | 0.78115600  |
| H  | 0.11641000  | 0.10729100  | -1.33212700 |
| H  | -1.97425000 | -1.49515300 | -1.09416200 |
| H  | -2.24513700 | -2.63108400 | 2.32013900  |
| H  | -2.18679000 | -4.60050000 | 1.47761500  |

| DFT MN15L, solvent water, smd model          |              |                  |
|----------------------------------------------|--------------|------------------|
| Sum of electronic and zero-point Energies=   | -3267.484408 | $E_0 + E_{ZPE}$  |
| Sum of electronic and thermal Energies=      | -3267.448982 | $E_0 + E_{tot}$  |
| Sum of electronic and thermal Enthalpies=    | -3267.448038 | $E_0 + H_{corr}$ |
| Sum of electronic and thermal Free Energies= | -3267.543325 | $E_0 + G_{corr}$ |
| Zero-point correction ( <i>unscaled</i> ) =  | 0.335499     |                  |

### Complex [CX-2]<sup>+</sup>

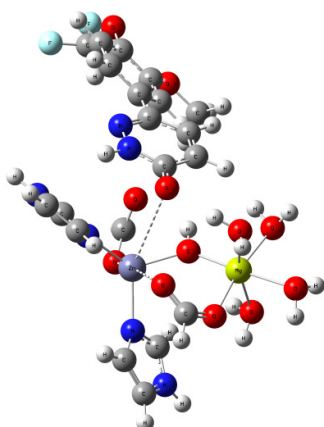

|    |             |             |             |
|----|-------------|-------------|-------------|
| O  | 0.46296500  | 0.42553200  | 0.02775400  |
| O  | 2.39390000  | -0.40284800 | 2.06197500  |
| H  | 3.00268700  | -0.40707300 | 1.30618300  |
| H  | 0.96530800  | 0.16077500  | -0.76063900 |
| H  | 1.70756500  | -3.07067800 | 2.86376900  |
| H  | 0.06805100  | 0.04463700  | 3.75345000  |
| O  | 1.53034500  | -2.36428100 | 0.05954900  |
| C  | 1.45752600  | -3.62558100 | -0.09818300 |
| O  | -1.35675400 | -1.87052800 | 0.95249100  |
| H  | 2.25769100  | -4.07039000 | -0.74793600 |
| O  | -0.34523100 | 0.15896900  | 2.88251000  |
| O  | 0.86934500  | -2.61925700 | 3.05414300  |
| O  | 0.60373800  | -4.39499700 | 0.38785400  |
| O  | -3.78911600 | -2.10250000 | -1.06960700 |
| H  | -5.36586700 | -0.96809800 | -0.50019200 |
| N  | -0.94365200 | -2.82692300 | -2.17943600 |
| C  | -0.73063000 | -1.55068300 | -2.48185600 |
| C  | 0.00135800  | -3.55393000 | -2.88268400 |
| N  | -2.90248200 | -5.04340100 | 0.06673200  |
| C  | -2.33532600 | -6.25226500 | 0.43792000  |
| C  | -4.22052900 | -5.22115600 | 0.09904800  |
| C  | -4.56130700 | -1.67108300 | -0.15530900 |
| H  | 0.64072600  | -0.56114600 | -3.74724700 |
| N  | -4.51577300 | -6.48412900 | 0.46593100  |
| H  | -3.31451700 | -8.20215200 | 0.99458100  |
| O  | -4.51101300 | -1.95282800 | 1.06114000  |
| H  | -5.45369900 | -6.86766400 | 0.55815900  |
| C  | -3.33166100 | -7.16052600 | 0.68823400  |
| H  | -1.25732600 | -6.37951400 | 0.50109600  |
| H  | -4.97434200 | -4.47364300 | -0.14007700 |
| H  | -1.30819100 | -0.70650900 | -2.10556400 |
| H  | 1.60872400  | -2.86141000 | -4.30018000 |
| C  | 0.77941900  | -2.69811100 | -3.61817100 |
| H  | 0.06332300  | -4.63685500 | -2.79741900 |
| N  | 0.29432600  | -1.43217200 | -3.35149000 |
| Mg | 0.48061200  | -1.23824000 | 1.45000500  |
| Zn | -2.04157900 | -3.19175200 | -0.37300500 |
| H  | 2.29983400  | 0.53756000  | 2.28208000  |
| H  | -1.28347800 | -0.03678500 | 3.04107500  |
| H  | -0.44144500 | 0.54119700  | -0.30534000 |
| H  | -2.14370900 | -1.53806300 | 1.40571300  |
| H  | 0.20422500  | -3.34153200 | 3.06554400  |

|   |              |             |            |
|---|--------------|-------------|------------|
| O | -1.23933200  | -4.58287500 | 3.14561700 |
| C | -2.31159400  | -4.01255000 | 3.44075700 |
| N | -3.50805600  | -4.68247300 | 3.29927700 |
| C | -2.45552200  | -2.67452300 | 3.96782400 |
| N | -4.75252200  | -4.22645600 | 3.51118200 |
| H | -3.46306400  | -5.64456800 | 2.94911900 |
| C | -3.70246900  | -2.17919300 | 4.21541300 |
| H | -1.54383500  | -2.10098000 | 4.16018700 |
| C | -4.86160500  | -2.98731400 | 3.95282900 |
| H | -3.83003700  | -1.17634000 | 4.63315700 |
| C | -6.23887500  | -2.46570300 | 4.14579600 |
| C | -7.28671200  | -3.32363700 | 4.51678400 |
| C | -6.48498200  | -1.09378300 | 3.93166700 |
| C | -8.57824900  | -2.81044800 | 4.67511900 |
| H | -7.08860300  | -4.38308200 | 4.69481800 |
| C | -7.77693100  | -0.57672100 | 4.09225900 |
| H | -5.66913400  | -0.44331400 | 3.60922700 |
| C | -8.81396100  | -1.45571400 | 4.47089300 |
| H | -9.41553800  | -3.44866000 | 4.97267800 |
| O | -8.13587600  | 0.71931700  | 3.90772800 |
| O | -10.09104800 | -0.92921700 | 4.68902400 |
| C | -7.10170500  | 1.62930700  | 3.53004200 |
| C | -10.81734100 | -0.77399200 | 3.52478700 |
| H | -6.65680000  | 1.34025900  | 2.56102300 |
| H | -6.31230000  | 1.66881200  | 4.30173900 |
| H | -7.58554200  | 2.61092500  | 3.44013000 |
| F | -11.88531500 | -0.03302000 | 3.84813100 |
| F | -11.28594400 | -1.98145400 | 3.11776300 |
| H | -10.24997400 | -0.31137200 | 2.69663900 |

|                                              |              |                  |
|----------------------------------------------|--------------|------------------|
| DFT MN15L, solvent water, smd model          |              |                  |
| Sum of electronic and zero-point Energies=   | -4188.620483 | $E_0 + E_{ZPE}$  |
| Sum of electronic and thermal Energies=      | -4188.569889 | $E_0 + E_{tot}$  |
| Sum of electronic and thermal Enthalpies=    | -4188.568945 | $E_0 + H_{corr}$ |
| Sum of electronic and thermal Free Energies= | -4188.700166 | $E_0 + G_{corr}$ |
| Zero-point correction ( <i>unscaled</i> ) =  | 0.522772     |                  |

Complex [CX-3]<sup>+</sup>

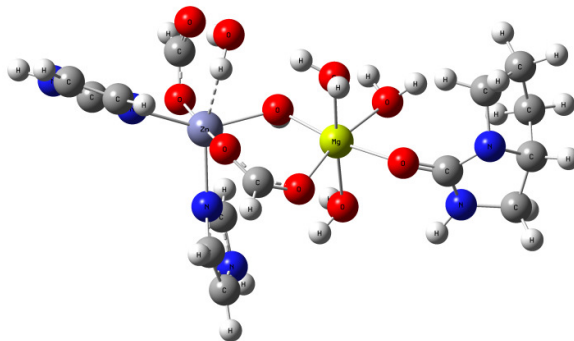

|    |             |             |             |
|----|-------------|-------------|-------------|
| O  | 0.20352100  | -0.02014600 | -0.51362700 |
| H  | 0.97205900  | -0.55780700 | -0.77254700 |
| H  | -1.34877000 | -2.30739500 | 3.34600400  |
| H  | -2.68673700 | 0.88729000  | 1.74755700  |
| O  | -3.00653400 | -4.62339200 | 1.52987600  |
| O  | 0.79081400  | -2.28766200 | 1.22444000  |
| C  | 0.87471300  | -3.54701800 | 1.26662900  |
| O  | -2.02073200 | -2.14370200 | -0.26039800 |
| H  | 1.85178300  | -3.96104500 | 1.62733400  |
| O  | -2.38305100 | 0.51064700  | 0.90501300  |
| O  | -1.94562700 | -2.04273200 | 2.62845000  |
| O  | -0.01244000 | -4.37568200 | 0.94717600  |
| O  | -2.83933600 | -3.75789600 | -2.68628800 |
| H  | -4.82054900 | -3.91199800 | -3.07605000 |
| H  | -3.34637600 | -4.47036100 | 0.62598100  |
| N  | 0.26128300  | -3.16786500 | -2.20712500 |
| C  | 0.03333800  | -2.22967800 | -3.12028000 |
| C  | 1.63213800  | -3.19241000 | -2.01276800 |
| N  | -1.51839600 | -6.07484500 | -1.06742300 |
| C  | -1.25173100 | -7.03289800 | -0.09938100 |
| C  | -2.07197200 | -6.72783200 | -2.08494200 |
| C  | -4.02007600 | -4.00340900 | -2.29314900 |
| H  | 1.28347700  | -0.93662900 | -4.22680900 |
| N  | -2.16064100 | -8.04647400 | -1.81537200 |
| H  | -1.61454200 | -9.25449900 | -0.10917900 |
| O  | -4.37573000 | -4.33292800 | -1.13892400 |
| H  | -2.54309000 | -8.75228400 | -2.43972000 |
| C  | -1.64656400 | -8.26417600 | -0.55370800 |
| H  | -0.79894400 | -6.76973600 | 0.85265000  |
| H  | -2.40845600 | -6.28716400 | -3.02046100 |
| H  | -0.94365500 | -1.93659600 | -3.50223400 |
| H  | 3.26289400  | -1.98521000 | -2.99300700 |
| C  | 2.22608700  | -2.26654000 | -2.83321500 |
| H  | 2.09465100  | -3.88136000 | -1.30815800 |
| N  | 1.19267600  | -1.67155800 | -3.52931600 |
| Mg | -0.89115200 | -1.07422400 | 1.02707800  |

|    |             |             |             |
|----|-------------|-------------|-------------|
| Zn | -1.37142800 | -3.91246600 | -1.00975200 |
| H  | -3.18793700 | 0.14391500  | 0.50519500  |
| H  | -0.32756200 | 0.03677800  | -1.32534800 |
| H  | -2.20621900 | -1.65354600 | -1.07636500 |
| H  | -2.35848300 | -2.87623600 | 2.32412600  |
| H  | -2.05515200 | -4.76600400 | 1.38441000  |
| O  | 0.00815900  | 0.12060900  | 2.52388900  |
| C  | 0.03477100  | 1.35805000  | 2.69104000  |
| N  | -0.39217100 | 1.99497300  | 3.84364200  |
| N  | 0.49002800  | 2.26793300  | 1.80134800  |
| C  | -0.52633300 | 3.43707600  | 3.50952500  |
| C  | -1.66288200 | 1.51768300  | 4.44788100  |
| C  | 0.47790400  | 3.61480600  | 2.36300300  |
| H  | 1.07881700  | 1.97662400  | 1.02564200  |
| C  | -2.00950400 | 3.54981600  | 3.14208100  |
| H  | -0.28291700 | 4.06312400  | 4.38329900  |
| C  | -2.67179600 | 2.67258900  | 4.21648300  |
| H  | -1.96391000 | 0.57948600  | 3.95000000  |
| H  | -1.52236200 | 1.30183300  | 5.51820500  |
| H  | 0.14059600  | 4.36024100  | 1.62564400  |
| H  | 1.47665900  | 3.90313300  | 2.73615200  |
| H  | -2.15395900 | 3.11457400  | 2.13322200  |
| H  | -2.37715400 | 4.58723700  | 3.13364700  |
| H  | -3.66072000 | 2.29334300  | 3.91529400  |
| H  | -2.79884400 | 3.25462300  | 5.14526800  |

|                                              |              |                  |
|----------------------------------------------|--------------|------------------|
| DFT MN15L, solvent water, smd model          |              |                  |
| Sum of electronic and zero-point Energies=   | -3610.162714 | $E_0 + E_{ZPE}$  |
| Sum of electronic and thermal Energies=      | -3610.121165 | $E_0 + E_{tot}$  |
| Sum of electronic and thermal Enthalpies=    | -3610.120221 | $E_0 + H_{corr}$ |
| Sum of electronic and thermal Free Energies= | -3610.230046 | $E_0 + G_{corr}$ |
| Zero-point correction ( <i>unscaled</i> ) =  | 0.475390     |                  |



Complex [CX-4]<sup>+</sup>

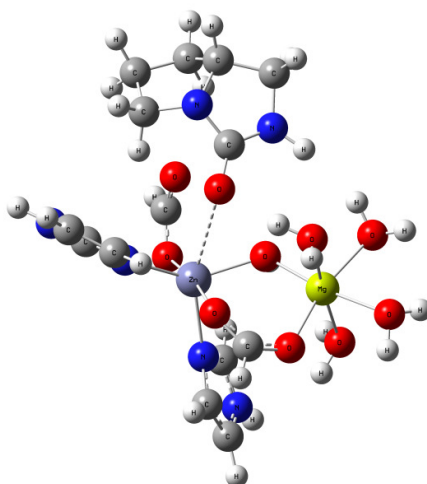

|    |             |             |             |
|----|-------------|-------------|-------------|
| O  | 0.16911400  | 0.12966300  | -0.55767900 |
| O  | 1.00147000  | 0.15359500  | 2.32810400  |
| H  | 1.89068200  | 0.15507700  | 1.94041400  |
| H  | 0.91204500  | -0.29219900 | -1.02415300 |
| H  | 0.21655000  | -2.50235100 | 3.32433100  |
| H  | -1.62471600 | 0.89257900  | 2.47330300  |
| O  | 1.44888600  | -2.14586200 | 0.78055400  |
| C  | 1.58519000  | -3.40515800 | 0.79696300  |
| O  | -1.74153600 | -2.16387400 | 0.19551200  |
| H  | 2.64253000  | -3.77886800 | 0.81569100  |
| O  | -1.84738000 | 0.31731000  | 1.72478300  |
| O  | -0.63493000 | -2.20712500 | 2.96474900  |
| O  | 0.67168000  | -4.26108400 | 0.79337100  |
| O  | -2.93318200 | -3.78166800 | -2.22497800 |
| H  | -4.94553200 | -3.77557500 | -2.45500900 |
| N  | 0.06366300  | -3.10621000 | -2.25716000 |
| C  | -0.41776700 | -2.12886600 | -3.01868100 |
| C  | 1.43521200  | -3.09310100 | -2.44613000 |
| N  | -1.49337100 | -6.03632300 | -0.48803600 |
| C  | -1.01966200 | -6.87335400 | 0.51248100  |
| C  | -2.37891800 | -6.75235200 | -1.17659300 |
| C  | -4.09611700 | -3.90012000 | -1.72983400 |
| H  | 0.45965700  | -0.73383800 | -4.34062400 |
| N  | -2.47808700 | -7.99932000 | -0.67379700 |
| H  | -1.53112800 | -9.01386800 | 0.98335800  |
| O  | -4.37972200 | -4.14093500 | -0.53587100 |
| H  | -3.07990200 | -8.73499200 | -1.03587200 |
| C  | -1.62474600 | -8.09822200 | 0.40692800  |
| H  | -0.28936500 | -6.53157700 | 1.23992800  |
| H  | -2.94407200 | -6.41243400 | -2.04144000 |
| H  | -1.46542600 | -1.84608200 | -3.10523000 |
| H  | 2.71902500  | -1.78295200 | -3.75592800 |
| C  | 1.76964700  | -2.10492500 | -3.33780200 |
| H  | 2.08709400  | -3.80167900 | -1.93829200 |
| N  | 0.57573200  | -1.50909900 | -3.69253200 |
| Mg | -0.31429400 | -1.10936700 | 1.15586500  |
| Zn | -1.30287500 | -3.93664900 | -0.68833900 |
| H  | 0.75059000  | 1.08978600  | 2.35862600  |

|   |             |             |             |
|---|-------------|-------------|-------------|
| H | -2.62261300 | -0.18301900 | 2.02876100  |
| H | -0.55018200 | 0.11912200  | -1.21063600 |
| H | -2.10531300 | -1.66075200 | -0.54963800 |
| H | -1.10685400 | -3.03773300 | 2.73312300  |
| O | -2.28451000 | -4.42132300 | 2.30239600  |
| C | -3.40787500 | -4.20616800 | 2.78560700  |
| N | -4.30886400 | -5.19982200 | 3.14217200  |
| N | -3.94546600 | -2.98041900 | 3.05179600  |
| C | -5.60462600 | -4.54739100 | 3.45259600  |
| C | -4.52456500 | -6.28906300 | 2.15219000  |
| C | -5.18817700 | -3.11264200 | 3.81031100  |
| H | -3.31624100 | -2.18758700 | 3.17853400  |
| C | -6.40308300 | -4.72792200 | 2.15897700  |
| H | -6.10008400 | -5.05547700 | 4.29678500  |
| C | -6.01026500 | -6.15271000 | 1.73501900  |
| H | -3.83617400 | -6.13795100 | 1.30367900  |
| H | -4.30717700 | -7.27408400 | 2.59675000  |
| H | -5.93950100 | -2.37180800 | 3.49342600  |
| H | -5.01026800 | -3.00127000 | 4.89471700  |
| H | -6.05119300 | -3.98474700 | 1.42100500  |
| H | -7.48720400 | -4.59943600 | 2.30213500  |
| H | -6.14278000 | -6.33471600 | 0.65626200  |
| H | -6.62596500 | -6.88670900 | 2.28325700  |

|                                              |              |                  |
|----------------------------------------------|--------------|------------------|
| DFT MN15L, solvent water, smd model          |              |                  |
| Sum of electronic and zero-point Energies=   | -3610.163951 | $E_0 + E_{ZPE}$  |
| Sum of electronic and thermal Energies=      | -3610.122519 | $E_0 + E_{tot}$  |
| Sum of electronic and thermal Enthalpies=    | -3610.121575 | $E_0 + H_{corr}$ |
| Sum of electronic and thermal Free Energies= | -3610.229437 | $E_0 + G_{corr}$ |
| Zero-point correction ( <i>unscaled</i> ) =  | 0.474904     |                  |

Complex [CX-5]<sup>+</sup>

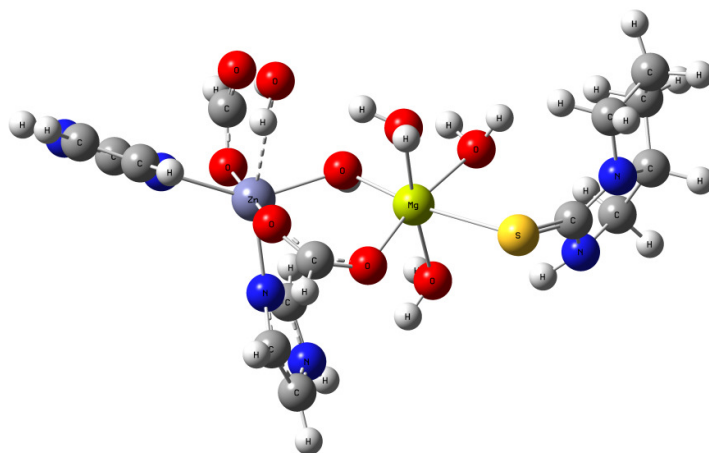

|    |             |             |             |
|----|-------------|-------------|-------------|
| O  | 0.59136200  | -0.14229500 | -0.32619800 |
| H  | 1.34929300  | -0.67425900 | -0.62654400 |
| H  | -1.05173000 | -2.59816400 | 3.43080300  |
| H  | -2.32080100 | 0.55330600  | 2.06410200  |
| O  | -2.94359600 | -4.55005000 | 1.47832000  |
| O  | 1.06280300  | -2.62111400 | 1.25955500  |
| C  | 1.02448700  | -3.88172300 | 1.19309600  |
| O  | -1.71679300 | -2.16469100 | -0.17677200 |
| H  | 1.93267100  | -4.42037900 | 1.56586500  |
| O  | -1.91469000 | 0.39993800  | 1.19382000  |
| O  | -1.59774400 | -2.22399100 | 2.72200200  |
| O  | 0.08429700  | -4.59099500 | 0.75505100  |
| O  | -2.62014800 | -3.53417600 | -2.69103200 |
| H  | -4.59073400 | -3.37436600 | -3.12584700 |
| H  | -3.24398700 | -4.24196900 | 0.60040700  |
| N  | 0.42771200  | -3.20766300 | -2.22234300 |
| C  | 0.23566200  | -2.19405500 | -3.06050500 |
| C  | 1.79817400  | -3.30663700 | -2.04796900 |
| N  | -1.71404000 | -6.07562500 | -1.17783800 |
| C  | -1.48309900 | -7.09567400 | -0.26571400 |
| C  | -2.40267900 | -6.62443700 | -2.17296200 |
| C  | -3.83418500 | -3.61273000 | -2.33002200 |
| H  | 1.53220400  | -0.88010100 | -4.08519400 |
| N  | -2.61298400 | -7.93734700 | -1.94202700 |
| H  | -2.07877400 | -9.26624400 | -0.32422200 |
| O  | -4.26541200 | -3.92614100 | -1.19798300 |
| H  | -3.10776800 | -8.57428300 | -2.56162500 |
| C  | -2.03722900 | -8.25995100 | -0.73054300 |
| H  | -0.93787400 | -6.91922300 | 0.65796400  |
| H  | -2.75229100 | -6.11537700 | -3.06810900 |
| H  | -0.72893300 | -1.82859700 | -3.40844500 |
| H  | 3.47409400  | -2.10564800 | -2.95822700 |
| C  | 2.42703200  | -2.35101800 | -2.80607300 |
| H  | 2.23621100  | -4.06495800 | -1.40142800 |
| N  | 1.41555400  | -1.66052600 | -3.44313100 |
| Mg | -0.50519400 | -1.26557400 | 1.14605400  |
| Zn | -1.21725600 | -3.94794600 | -1.03669000 |
| H  | -2.65909300 | 0.10867800  | 0.64118900  |
| H  | 0.04355000  | -0.04250300 | -1.12330700 |

|   |             |             |             |
|---|-------------|-------------|-------------|
| H | -1.87058400 | -1.61971600 | -0.96411500 |
| H | -2.09870700 | -2.98637900 | 2.36266600  |
| H | -2.03877700 | -4.85773500 | 1.29845300  |
| C | 0.24199800  | 1.64935700  | 2.86399100  |
| N | -0.51226700 | 2.36089000  | 3.72379000  |
| N | 0.48932600  | 2.38800500  | 1.75137600  |
| C | -1.04956000 | 3.58033600  | 3.06597700  |
| C | -1.46901800 | 1.78418800  | 4.68799800  |
| C | -0.51327100 | 3.46225000  | 1.62459400  |
| H | 0.79289400  | 1.87025100  | 0.92633700  |
| C | -2.55295100 | 3.44774000  | 3.31709400  |
| H | -0.65081200 | 4.47730900  | 3.57462600  |
| C | -2.57337600 | 2.85369100  | 4.73588000  |
| H | -1.84624400 | 0.81910400  | 4.29493900  |
| H | -0.99582300 | 1.59620400  | 5.66466100  |
| H | -1.31010800 | 3.16520800  | 0.91660800  |
| H | -0.05117200 | 4.39458900  | 1.27093200  |
| H | -2.97524400 | 2.72557800  | 2.59120400  |
| H | -3.09436800 | 4.40157400  | 3.22939600  |
| H | -3.54504300 | 2.42645000  | 5.02378700  |
| H | -2.30592200 | 3.63603400  | 5.46812100  |
| S | 0.83289700  | 0.08655500  | 3.14583500  |

| DFT MN15L, solvent water, smd model          |              |                  |
|----------------------------------------------|--------------|------------------|
| Sum of electronic and zero-point Energies=   | -3933.104508 | $E_0 + E_{ZPE}$  |
| Sum of electronic and thermal Energies=      | -3933.062596 | $E_0 + E_{tot}$  |
| Sum of electronic and thermal Enthalpies=    | -3933.061652 | $E_0 + H_{corr}$ |
| Sum of electronic and thermal Free Energies= | -3933.173148 | $E_0 + G_{corr}$ |
| Zero-point correction ( <i>unscaled</i> ) =  | 0.473184     |                  |

Complex [CX-6]<sup>+</sup>

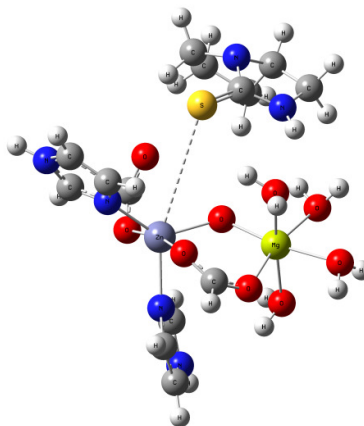

|    |             |             |             |
|----|-------------|-------------|-------------|
| O  | -0.63322200 | -0.05931400 | -0.35871500 |
| O  | 0.26113500  | -0.05641100 | 2.51654700  |
| H  | 1.18200100  | 0.09666600  | 2.25252600  |
| H  | 0.14362600  | -0.27976500 | -0.90225400 |
| H  | 0.50214700  | -2.94409600 | 3.18789700  |
| H  | -2.52773600 | -0.53649000 | 2.95831700  |
| O  | 1.25678100  | -2.02966300 | 0.65587900  |
| C  | 1.71783900  | -3.19736100 | 0.50564300  |
| O  | -1.80729400 | -2.86848900 | 0.27848000  |
| H  | 2.83468600  | -3.28681600 | 0.49816100  |
| O  | -2.48014200 | -0.60090200 | 1.99044400  |
| O  | -0.43426300 | -2.86015500 | 2.94614800  |
| O  | 1.05898400  | -4.25556200 | 0.36255700  |
| O  | -2.65198800 | -4.42468800 | -2.35873300 |
| H  | -4.62318800 | -4.82053400 | -2.59294300 |
| N  | 0.00555400  | -3.03487500 | -2.37561100 |
| C  | -0.73821500 | -2.15221200 | -3.03528800 |
| C  | 1.32216300  | -2.69545400 | -2.64011800 |
| N  | -0.81911200 | -6.38414100 | -0.70410300 |
| C  | -0.18166500 | -7.12021500 | 0.28407700  |
| C  | -1.51142800 | -7.25883400 | -1.42730800 |
| C  | -3.76407300 | -4.78328600 | -1.86736100 |
| H  | -0.29629400 | -0.51617400 | -4.29418000 |
| N  | -1.33696400 | -8.50921600 | -0.95474200 |
| H  | -0.20916800 | -9.33318900 | 0.69485200  |
| O  | -3.99816600 | -5.09682000 | -0.67876800 |
| H  | -1.75406600 | -9.35034200 | -1.34637600 |
| C  | -0.49501000 | -8.44591400 | 0.13775500  |
| H  | 0.44439800  | -6.64218400 | 1.03267700  |
| H  | -2.12846200 | -7.02857500 | -2.29270800 |
| H  | -1.82555100 | -2.11245400 | -3.03935400 |
| H  | 2.17831800  | -1.05100700 | -3.92006400 |
| C  | 1.35888000  | -1.60590300 | -3.47261200 |
| H  | 2.15155300  | -3.26567100 | -2.22624700 |
| N  | 0.03876500  | -1.28116800 | -3.71375000 |
| Mg | -0.67769800 | -1.52870500 | 1.25140100  |
| Zn | -0.94401600 | -4.28295500 | -0.87096500 |
| H  | -0.16171700 | 0.81182600  | 2.42430200  |
| H  | -3.23646600 | -1.16485400 | 1.75395400  |
| H  | -1.38352300 | -0.19701100 | -0.96021400 |

|   |             |             |             |
|---|-------------|-------------|-------------|
| H | -2.58802500 | -2.57231800 | -0.21176400 |
| H | -0.72026400 | -3.77611700 | 2.75029600  |
| C | -3.58051700 | -4.60580300 | 3.38670400  |
| N | -4.93914800 | -4.85346200 | 3.41540100  |
| N | -3.36055000 | -3.33816900 | 3.78187900  |
| C | -5.62490100 | -3.52853900 | 3.43432200  |
| C | -5.56851000 | -5.68704200 | 2.35889400  |
| C | -4.58813400 | -2.61445100 | 4.08739200  |
| H | -2.42604100 | -2.97539400 | 3.94827100  |
| C | -5.92425700 | -3.32222000 | 1.94761900  |
| H | -6.56082800 | -3.58935400 | 4.01412800  |
| C | -6.48390900 | -4.70581700 | 1.58460800  |
| H | -4.77781200 | -6.11593100 | 1.72502600  |
| H | -6.13660600 | -6.51397300 | 2.81304400  |
| H | -4.58034000 | -1.60083700 | 3.65281400  |
| H | -4.74075500 | -2.53329400 | 5.17878700  |
| H | -4.96266100 | -3.13092900 | 1.41840600  |
| H | -6.61945100 | -2.49249700 | 1.74802300  |
| H | -6.48854700 | -4.91796300 | 0.50543200  |
| H | -7.52145400 | -4.78189900 | 1.95501200  |
| S | -2.37846300 | -5.70942300 | 2.96380500  |

| DFT MN15L, solvent water, smd model          |              |                  |
|----------------------------------------------|--------------|------------------|
| Sum of electronic and zero-point Energies=   | -3933.113535 | $E_0 + E_{ZPE}$  |
| Sum of electronic and thermal Energies=      | -3933.071348 | $E_0 + E_{tot}$  |
| Sum of electronic and thermal Enthalpies=    | -3933.070404 | $E_0 + H_{corr}$ |
| Sum of electronic and thermal Free Energies= | -3933.180677 | $E_0 + G_{corr}$ |
| Zero-point correction ( <i>unscaled</i> ) =  | 0.471709     |                  |

**H<sub>2</sub>O**

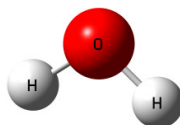

|   |             |             |            |
|---|-------------|-------------|------------|
| O | -2.94274200 | -4.54929400 | 1.47338700 |
| H | -3.24179900 | -4.24387400 | 0.60525500 |
| H | -2.04181900 | -4.85658600 | 1.29853800 |

| DFT MN15L, solvent water, smd model          |            |                  |
|----------------------------------------------|------------|------------------|
| Sum of electronic and zero-point Energies=   | -76.367044 | $E_0 + E_{ZPE}$  |
| Sum of electronic and thermal Energies=      | -76.364209 | $E_0 + E_{tot}$  |
| Sum of electronic and thermal Enthalpies=    | -76.363265 | $E_0 + H_{corr}$ |
| Sum of electronic and thermal Free Energies= | -76.378555 | $E_0 + G_{corr}$ |
| Zero-point correction ( <i>unscaled</i> ) =  | 0.021399   |                  |

### Zardaverine

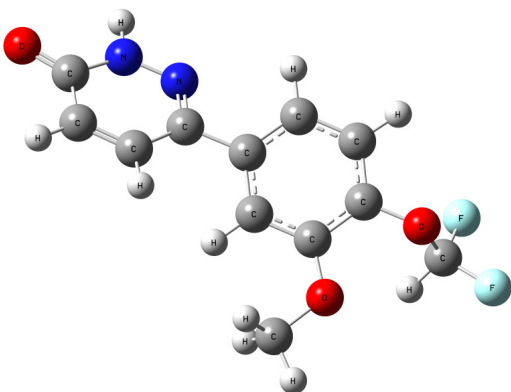

|   |             |             |             |
|---|-------------|-------------|-------------|
| F | 0.02728000  | 11.81373100 | 10.09223100 |
| O | 3.69855600  | 6.23068000  | 0.56384700  |
| O | -0.19068000 | 10.93410500 | 8.11519600  |
| F | 1.36001200  | 12.49365300 | 8.52677800  |
| C | 3.15168400  | 6.69853100  | 1.57875300  |
| N | 3.26970200  | 8.04597400  | 1.87103200  |
| C | 1.17461300  | 10.17209700 | 4.77110700  |
| C | 0.64028700  | 10.88556400 | 5.84815400  |
| C | 2.35678800  | 5.97273800  | 2.54410300  |
| O | 0.42708200  | 8.35626300  | 8.45381400  |
| C | 1.47175300  | 8.80622900  | 4.91617200  |
| C | 1.22865900  | 8.15681600  | 6.14423000  |
| N | 2.76412900  | 8.72582500  | 2.90855500  |
| C | 1.82214300  | 6.62988200  | 3.61358100  |
| C | 0.69278500  | 8.86946800  | 7.22525300  |
| C | 2.04522800  | 8.04005000  | 3.77884200  |
| C | 0.39918000  | 10.23864900 | 7.05466200  |
| C | 0.73185800  | 11.40054300 | 9.03047700  |
| C | 0.70727600  | 6.96994100  | 8.65277200  |
| H | 1.48518800  | 7.10243900  | 6.26118900  |
| H | 1.49162100  | 10.65365500 | 9.32511300  |
| H | 1.19941500  | 6.09443600  | 4.33577500  |
| H | 2.19912800  | 4.90480000  | 2.37482800  |
| H | 1.78316100  | 6.76111100  | 8.51541000  |
| H | 1.34646800  | 10.66951000 | 3.81425000  |
| H | 3.82326900  | 8.61355700  | 1.22414800  |
| H | 0.11792000  | 6.34583700  | 7.95759000  |
| H | 0.38965900  | 11.94712800 | 5.76293700  |
| H | 0.41497300  | 6.75215500  | 9.68862800  |

|                                              |             |                  |
|----------------------------------------------|-------------|------------------|
| DFT MN15L, solvent water, smd model          |             |                  |
| Sum of electronic and zero-point Energies=   | -997.484386 | $E_0 + E_{ZPE}$  |
| Sum of electronic and thermal Energies=      | -997.468369 | $E_0 + E_{tot}$  |
| Sum of electronic and thermal Enthalpies=    | -997.467425 | $E_0 + H_{corr}$ |
| Sum of electronic and thermal Free Energies= | -997.522766 | $E_0 + G_{corr}$ |
| Zero-point correction ( <i>unscaled</i> ) =  | 0.212569    |                  |

Ligand 1a'

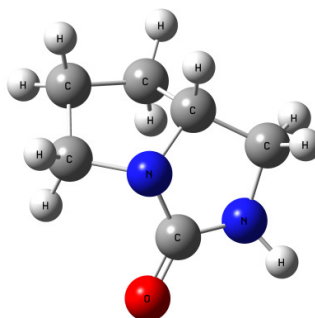

|   |             |            |            |
|---|-------------|------------|------------|
| O | 0.06201400  | 0.11560300 | 2.54142300 |
| C | 0.05695400  | 1.34270500 | 2.69825100 |
| N | -0.40046100 | 2.00000700 | 3.83896300 |
| N | 0.48252300  | 2.26588500 | 1.78386800 |
| C | -0.54612300 | 3.43528000 | 3.48957400 |
| C | -1.68075500 | 1.51127900 | 4.41588400 |
| C | 0.46609600  | 3.61026800 | 2.35197800 |
| H | 1.18186400  | 1.98597600 | 1.10075000 |
| C | -2.03237800 | 3.53929200 | 3.13385300 |
| H | -0.31017500 | 4.07427200 | 4.35739000 |
| C | -2.66069100 | 2.69718000 | 4.25357000 |
| H | -2.00516600 | 0.62034600 | 3.85291800 |
| H | -1.55193900 | 1.22017100 | 5.47031300 |
| H | 0.13822500  | 4.36116500 | 1.61516500 |
| H | 1.45895800  | 3.90153700 | 2.74006100 |
| H | -2.19597400 | 3.06332100 | 2.14710700 |
| H | -2.40283200 | 4.57541000 | 3.09763400 |
| H | -3.68365100 | 2.35658800 | 4.03267500 |
| H | -2.69210700 | 3.29146900 | 5.18388900 |

|                                              |             |                  |
|----------------------------------------------|-------------|------------------|
| DFT MN15L, solvent water, smd model          |             |                  |
| Sum of electronic and zero-point Energies=   | -419.034296 | $E_0 + E_{ZPE}$  |
| Sum of electronic and thermal Energies=      | -419.026960 | $E_0 + E_{tot}$  |
| Sum of electronic and thermal Enthalpies=    | -419.026016 | $E_0 + H_{corr}$ |
| Sum of electronic and thermal Free Energies= | -419.059290 | $E_0 + G_{corr}$ |
| Zero-point correction ( <i>unscaled</i> ) =  | 0.163911    |                  |



### Ligand 1e'

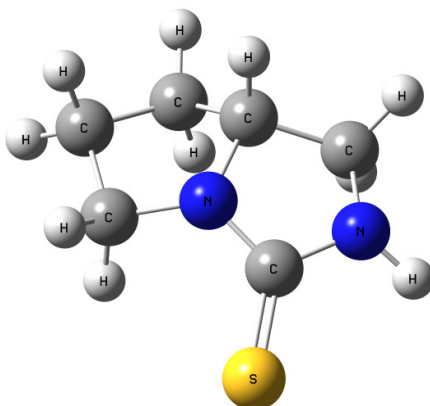

|   |             |            |            |
|---|-------------|------------|------------|
| C | 0.26426800  | 1.64414100 | 2.87507900 |
| N | -0.52542700 | 2.35061600 | 3.71757400 |
| N | 0.52995800  | 2.42173400 | 1.77701300 |
| C | -1.05049300 | 3.57245100 | 3.06123600 |
| C | -1.48849500 | 1.77161600 | 4.66663300 |
| C | -0.53189000 | 3.43276000 | 1.61898100 |
| H | 0.87239000  | 1.92568500 | 0.95661500 |
| C | -2.55320000 | 3.47149300 | 3.32952400 |
| H | -0.62796400 | 4.46813600 | 3.55576200 |
| C | -2.57073800 | 2.86185000 | 4.74230600 |
| H | -1.88610400 | 0.82551400 | 4.25323000 |
| H | -1.01898100 | 1.55246400 | 5.63933200 |
| H | -1.32675300 | 3.06592900 | 0.94078000 |
| H | -0.13009000 | 4.37469900 | 1.21951400 |
| H | -2.99930000 | 2.76522200 | 2.60355200 |
| H | -3.07567900 | 4.43735800 | 3.25823800 |
| H | -3.54863300 | 2.45291800 | 5.03667400 |
| H | -2.27860800 | 3.62997900 | 5.48058500 |
| S | 0.85767600  | 0.10074800 | 3.14451700 |

|                                              |             |                  |
|----------------------------------------------|-------------|------------------|
| DFT MN15L, solvent water, smd model          |             |                  |
| Sum of electronic and zero-point Energies=   | -741.984631 | $E_0 + E_{ZPE}$  |
| Sum of electronic and thermal Energies=      | -741.976734 | $E_0 + E_{tot}$  |
| Sum of electronic and thermal Enthalpies=    | -741.975789 | $E_0 + H_{corr}$ |
| Sum of electronic and thermal Free Energies= | -742.011017 | $E_0 + G_{corr}$ |
| Zero-point correction ( <i>unscaled</i> ) =  | 0.161445    |                  |

## 5. Molecular docking

Structures used in docking and binding energies of ligand in a top scored pose are shown below:

Variation of catechol ring C:

|                                                                                                                               |                                                                                                                        |                                                                                                                                 |                                                                                                                        |
|-------------------------------------------------------------------------------------------------------------------------------|------------------------------------------------------------------------------------------------------------------------|---------------------------------------------------------------------------------------------------------------------------------|------------------------------------------------------------------------------------------------------------------------|
| 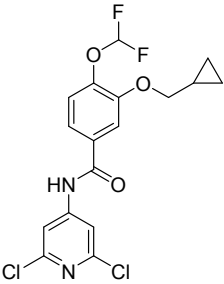 <p><b>Roflumilast</b><br/>-9.5 kcal/mol</p> |  <p><b>CMPI</b><br/>-9.7 kcal/mol</p> |  <p><b>(7S,7aR)-1a</b><br/>-10.7 kcal/mol</p> |  <p><b>1c</b><br/>-8.9 kcal/mol</p> |
|  <p>-10.1 kcal/mol</p>                      |  <p>-9.3 kcal/mol</p>                |  <p>-8.7 kcal/mol</p>                        |  <p><b>1</b><br/>-8.8 kcal/mol</p> |
|  <p>-9.4 kcal/mol</p>                      |  <p>-9.0 kcal/mol</p>               |  <p>-9.7 kcal/mol</p>                       |  <p>-9.5 kcal/mol</p>             |
|  <p><b>1b</b><br/>-9.7 kcal/mol</p>        |  <p>-10.4 kcal/mol</p>              |  <p>-9.8 kcal/mol</p>                       |  <p>-9.6 kcal/mol</p>             |

Variation of ring B:

|                                                                                                                                |                                                                                                                       |                                                                                                           |                                                                                                            |
|--------------------------------------------------------------------------------------------------------------------------------|-----------------------------------------------------------------------------------------------------------------------|-----------------------------------------------------------------------------------------------------------|------------------------------------------------------------------------------------------------------------|
| 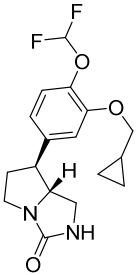 <p><b>(7S,7aR)-1a</b><br/>-10.7 kcal/mol</p> |  <p><b>2a</b><br/>-10.1 kcal/mol</p> |  <p>-9.6 kcal/mol</p>   |  <p>-9.9 kcal/mol</p>   |
|  <p>-9.4 kcal/mol</p>                         |  <p>-9.7 kcal/mol</p>                |  <p>-9.6 kcal/mol</p>   |  <p>-9.1 kcal/mol</p>   |
|  <p>-9.5 kcal/mol</p>                       |  <p>-9.8 kcal/mol</p>              |  <p>-9.4 kcal/mol</p> |  <p>-9.5 kcal/mol</p> |
|  <p>-10.0 kcal/mol</p>                      |  <p>-8.4 kcal/mol</p>              |  <p>-9.0 kcal/mol</p> |  <p>-9.2 kcal/mol</p> |

Variations in ring A:

|                                                                                                                                |                                                                                                                      |                                                                                                                        |                                                                                                            |
|--------------------------------------------------------------------------------------------------------------------------------|----------------------------------------------------------------------------------------------------------------------|------------------------------------------------------------------------------------------------------------------------|------------------------------------------------------------------------------------------------------------|
| 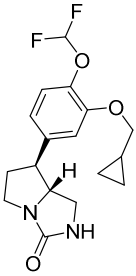 <p><b>(7S,7aR)-1a</b><br/>-10.7 kcal/mol</p> |  <p><b>1d</b><br/>-9.7 kcal/mol</p> |  <p>-9.9 kcal/mol</p>                |  <p>-10.9 kcal/mol</p>  |
|  <p>-10.2 kcal/mol</p>                       |  <p>-9.6 kcal/mol</p>              |  <p><b>1e</b><br/>-9.9 kcal/mol</p> |  <p>-9.6 kcal/mol</p>  |
|  <p>-9.9 kcal/mol</p>                       |  <p>-9.3 kcal/mol</p>             |  <p>-10.2 kcal/mol</p>             |  <p>-9.3 kcal/mol</p> |
|  <p>-9.7 kcal/mol</p>                       |  <p>-9.8 kcal/mol</p>             |  <p>-9.6 kcal/mol</p>              |  <p>-9.6 kcal/mol</p> |

### Binding modes of Roflumilast (crystal structure 1XMU)

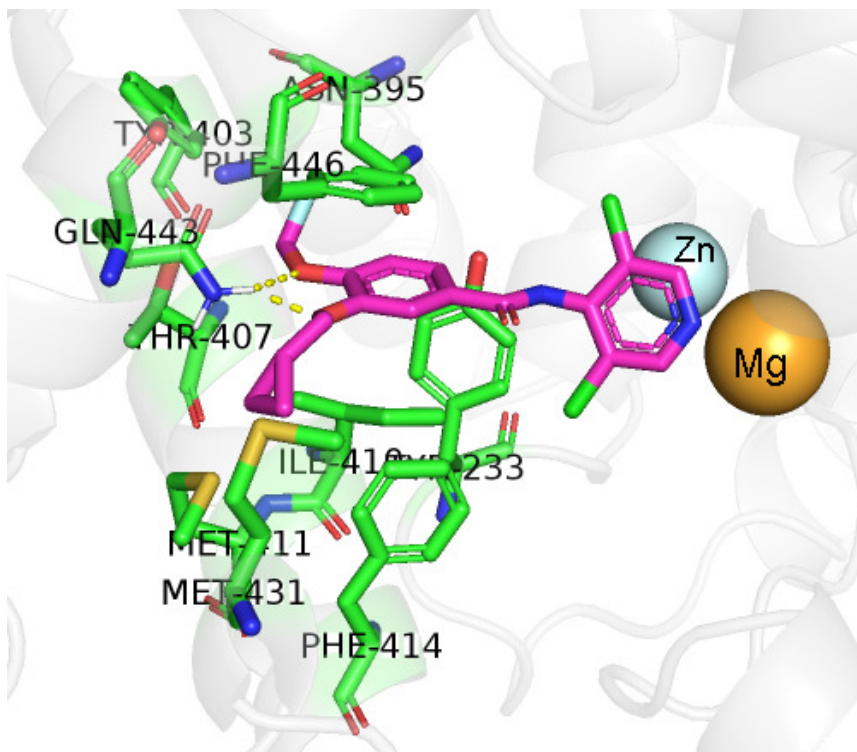

Residues in Q pocket of PDE4B interacting with Roflumilast.

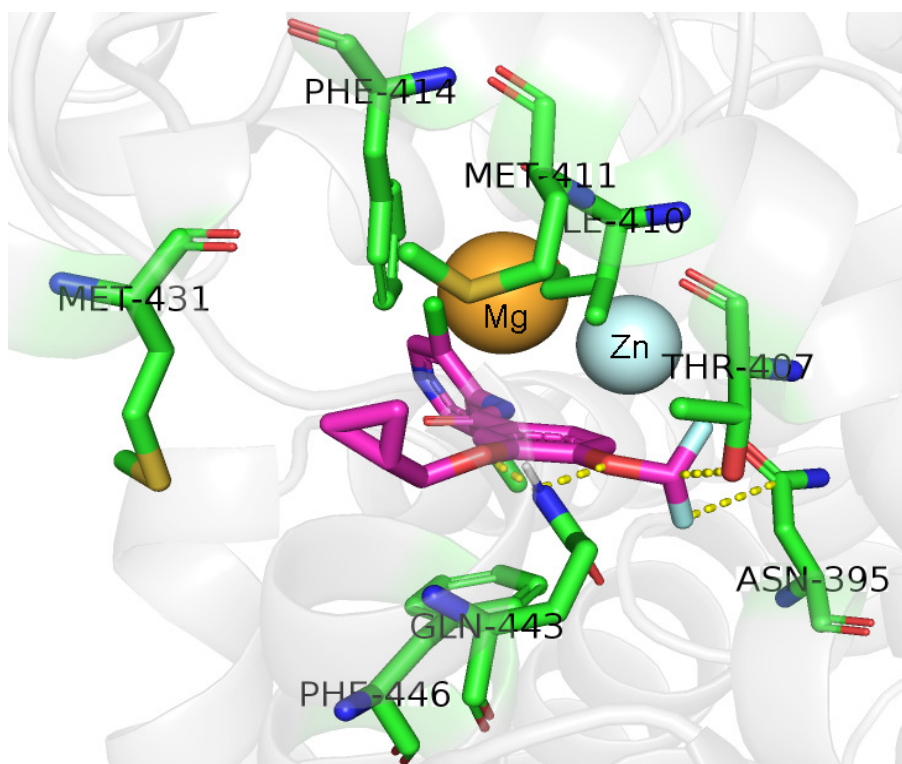

Close view on the di-fluoromethyl group making hydrogen bond with THR407 and multipolar interaction with TRP332.

**Molecular docking of CMPI and compound 1a into the catalytic site of PDE4B**

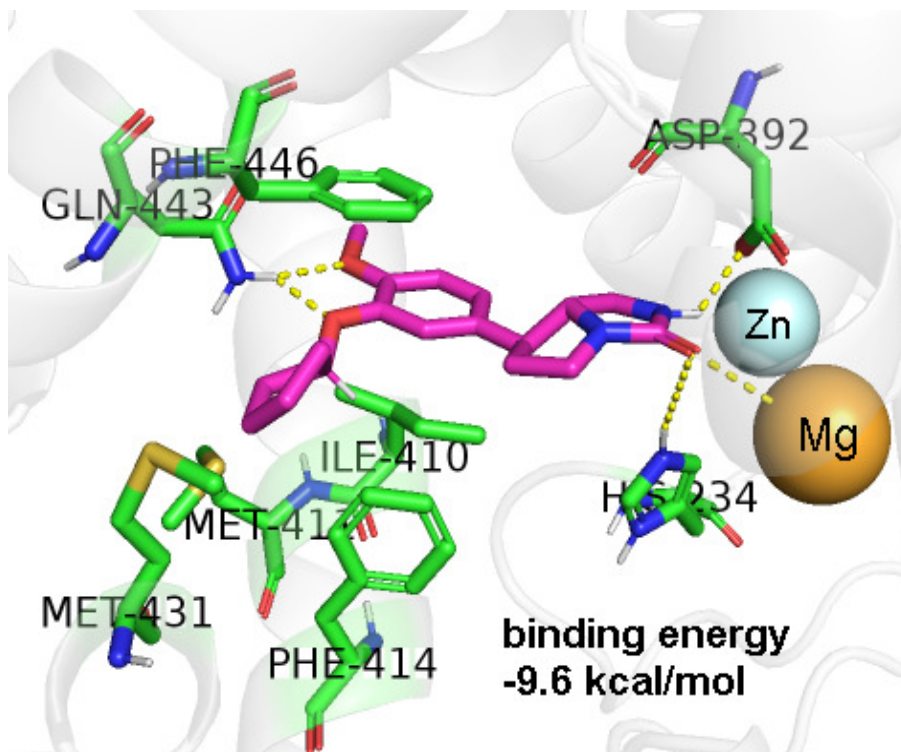

Residues in Q and M pockets of PDE4B interacting with **CMPI** and the resulting binding energy.

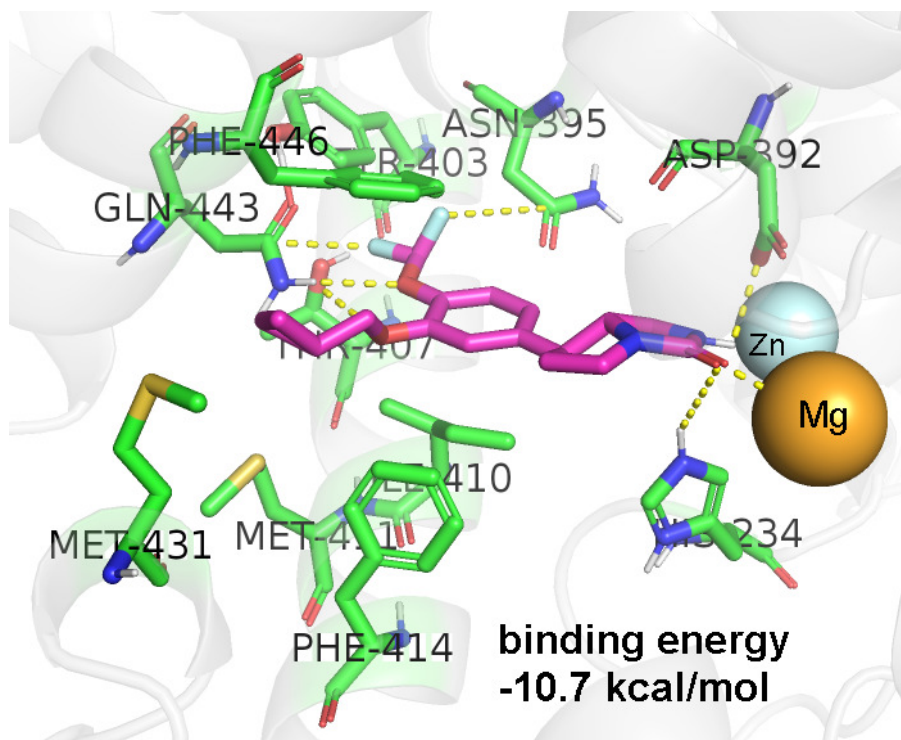

Residues in Q and M pockets of PDE4B interacting with **1a** and the resulting binding energy.

### Metalloprotein-ligand interactions for PDE4 inhibitors

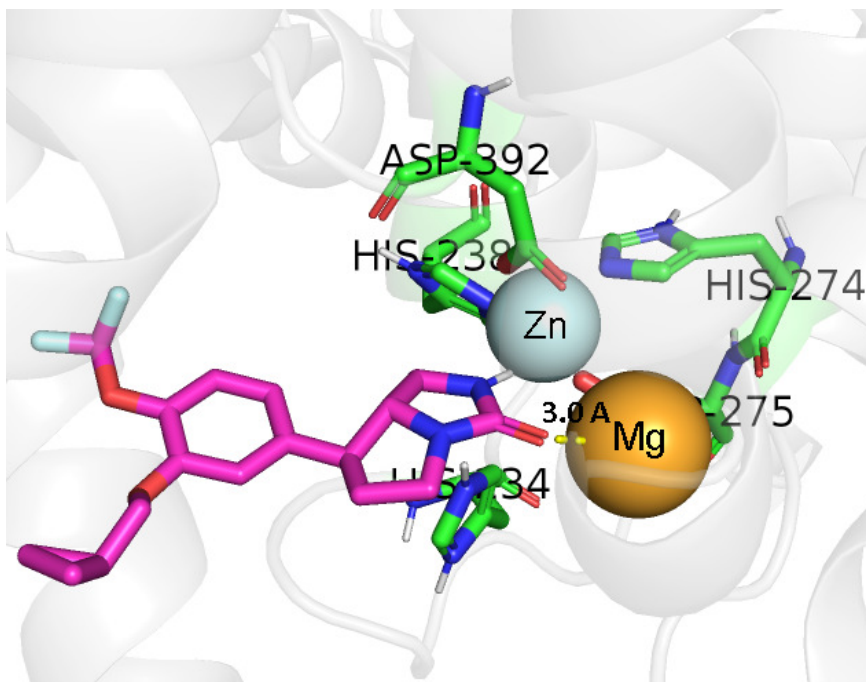

Docking of **1a** into the catalytic site of PDE4B (close view on the interactions in M pocket).

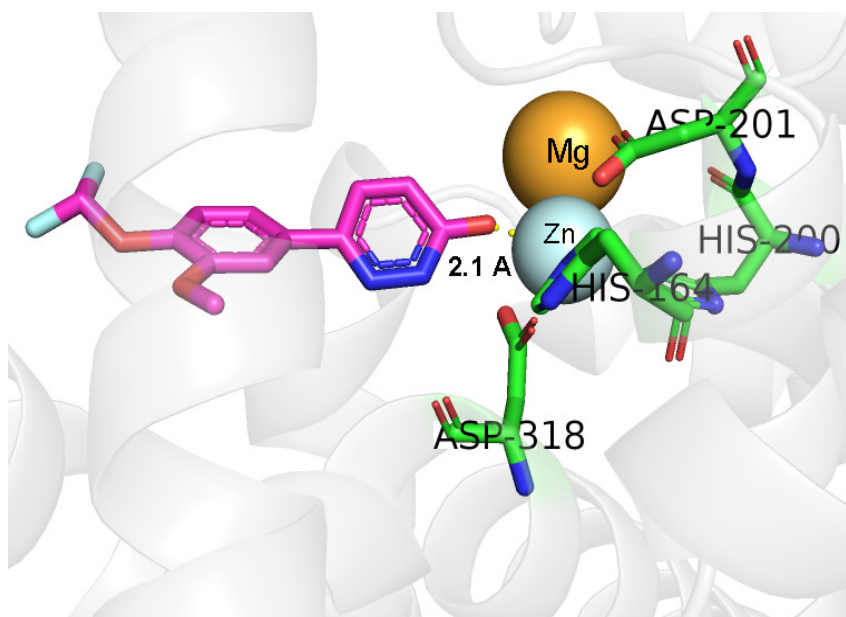

Interaction of Zardaverine with the Zn<sup>2+</sup> ion in M pocket of PDE4D (crystal structure 1XOR).

<sup>1</sup>H NMR (300 MHz, CDCl<sub>3</sub>)

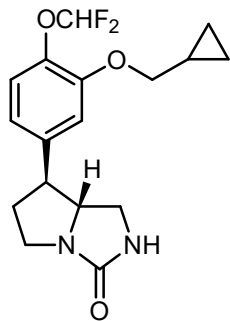

**1a**

7.26  
7.11  
7.08  
6.84  
6.78  
6.76  
6.59  
6.33  
6.01

3.87  
3.84  
3.71  
3.69  
3.55  
3.52  
3.49  
3.33  
3.29  
3.26

2.77  
2.75

2.37  
2.35

2.08  
2.04

1.26  
1.24

0.65  
0.62

0.35  
0.33

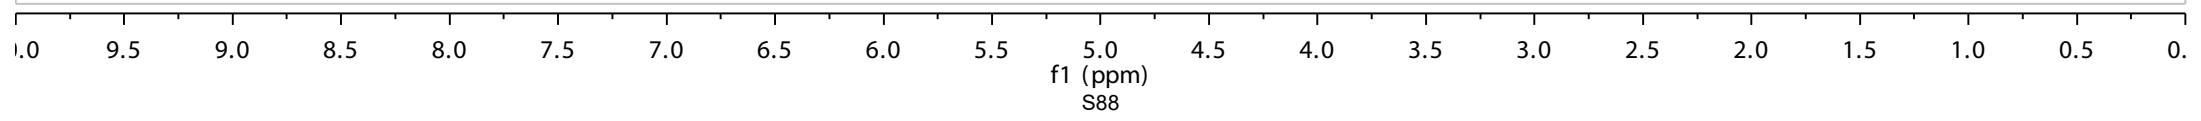



$^{13}\text{C}$  NMR (75 MHz,  $\text{CDCl}_3$ )

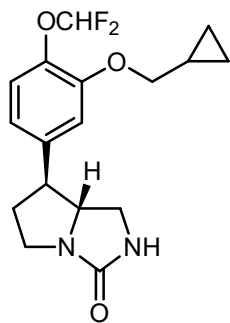

**1a**

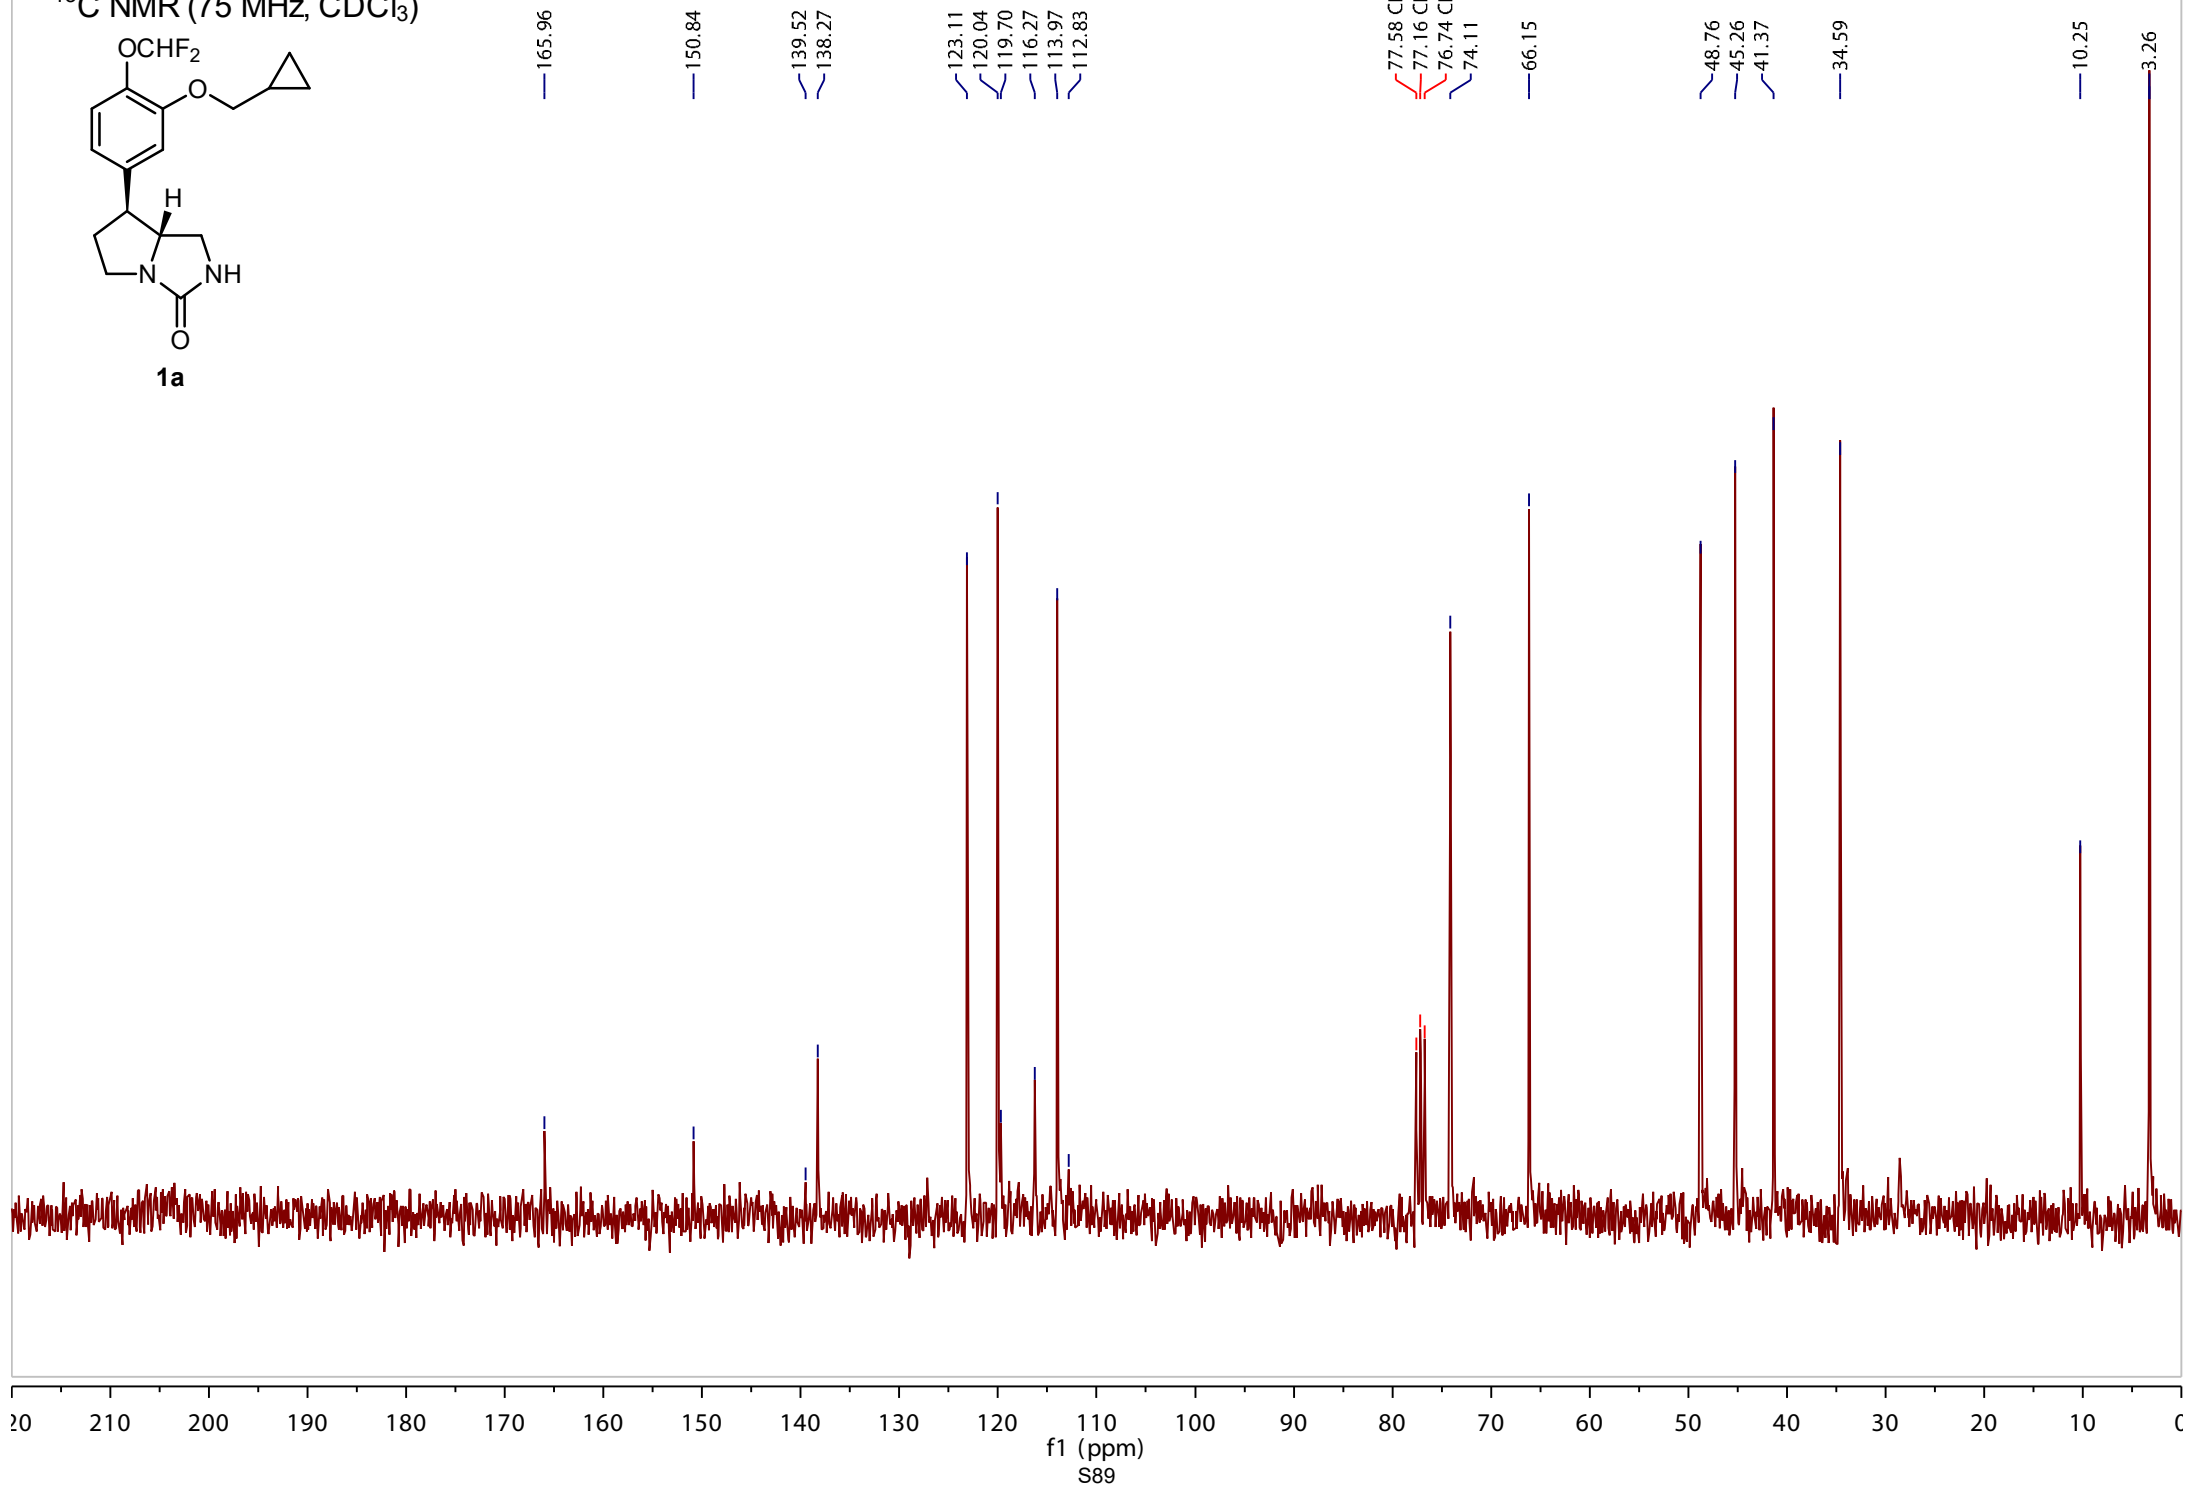

$^{19}\text{F}$  NMR (188 MHz,  $\text{CDCl}_3$ )



**1a**

-81.22  
-81.62

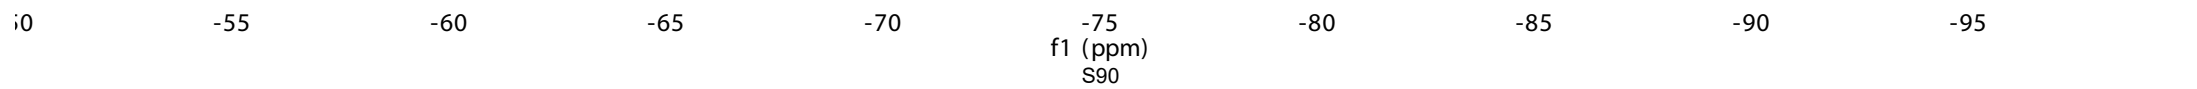

COSY NMR

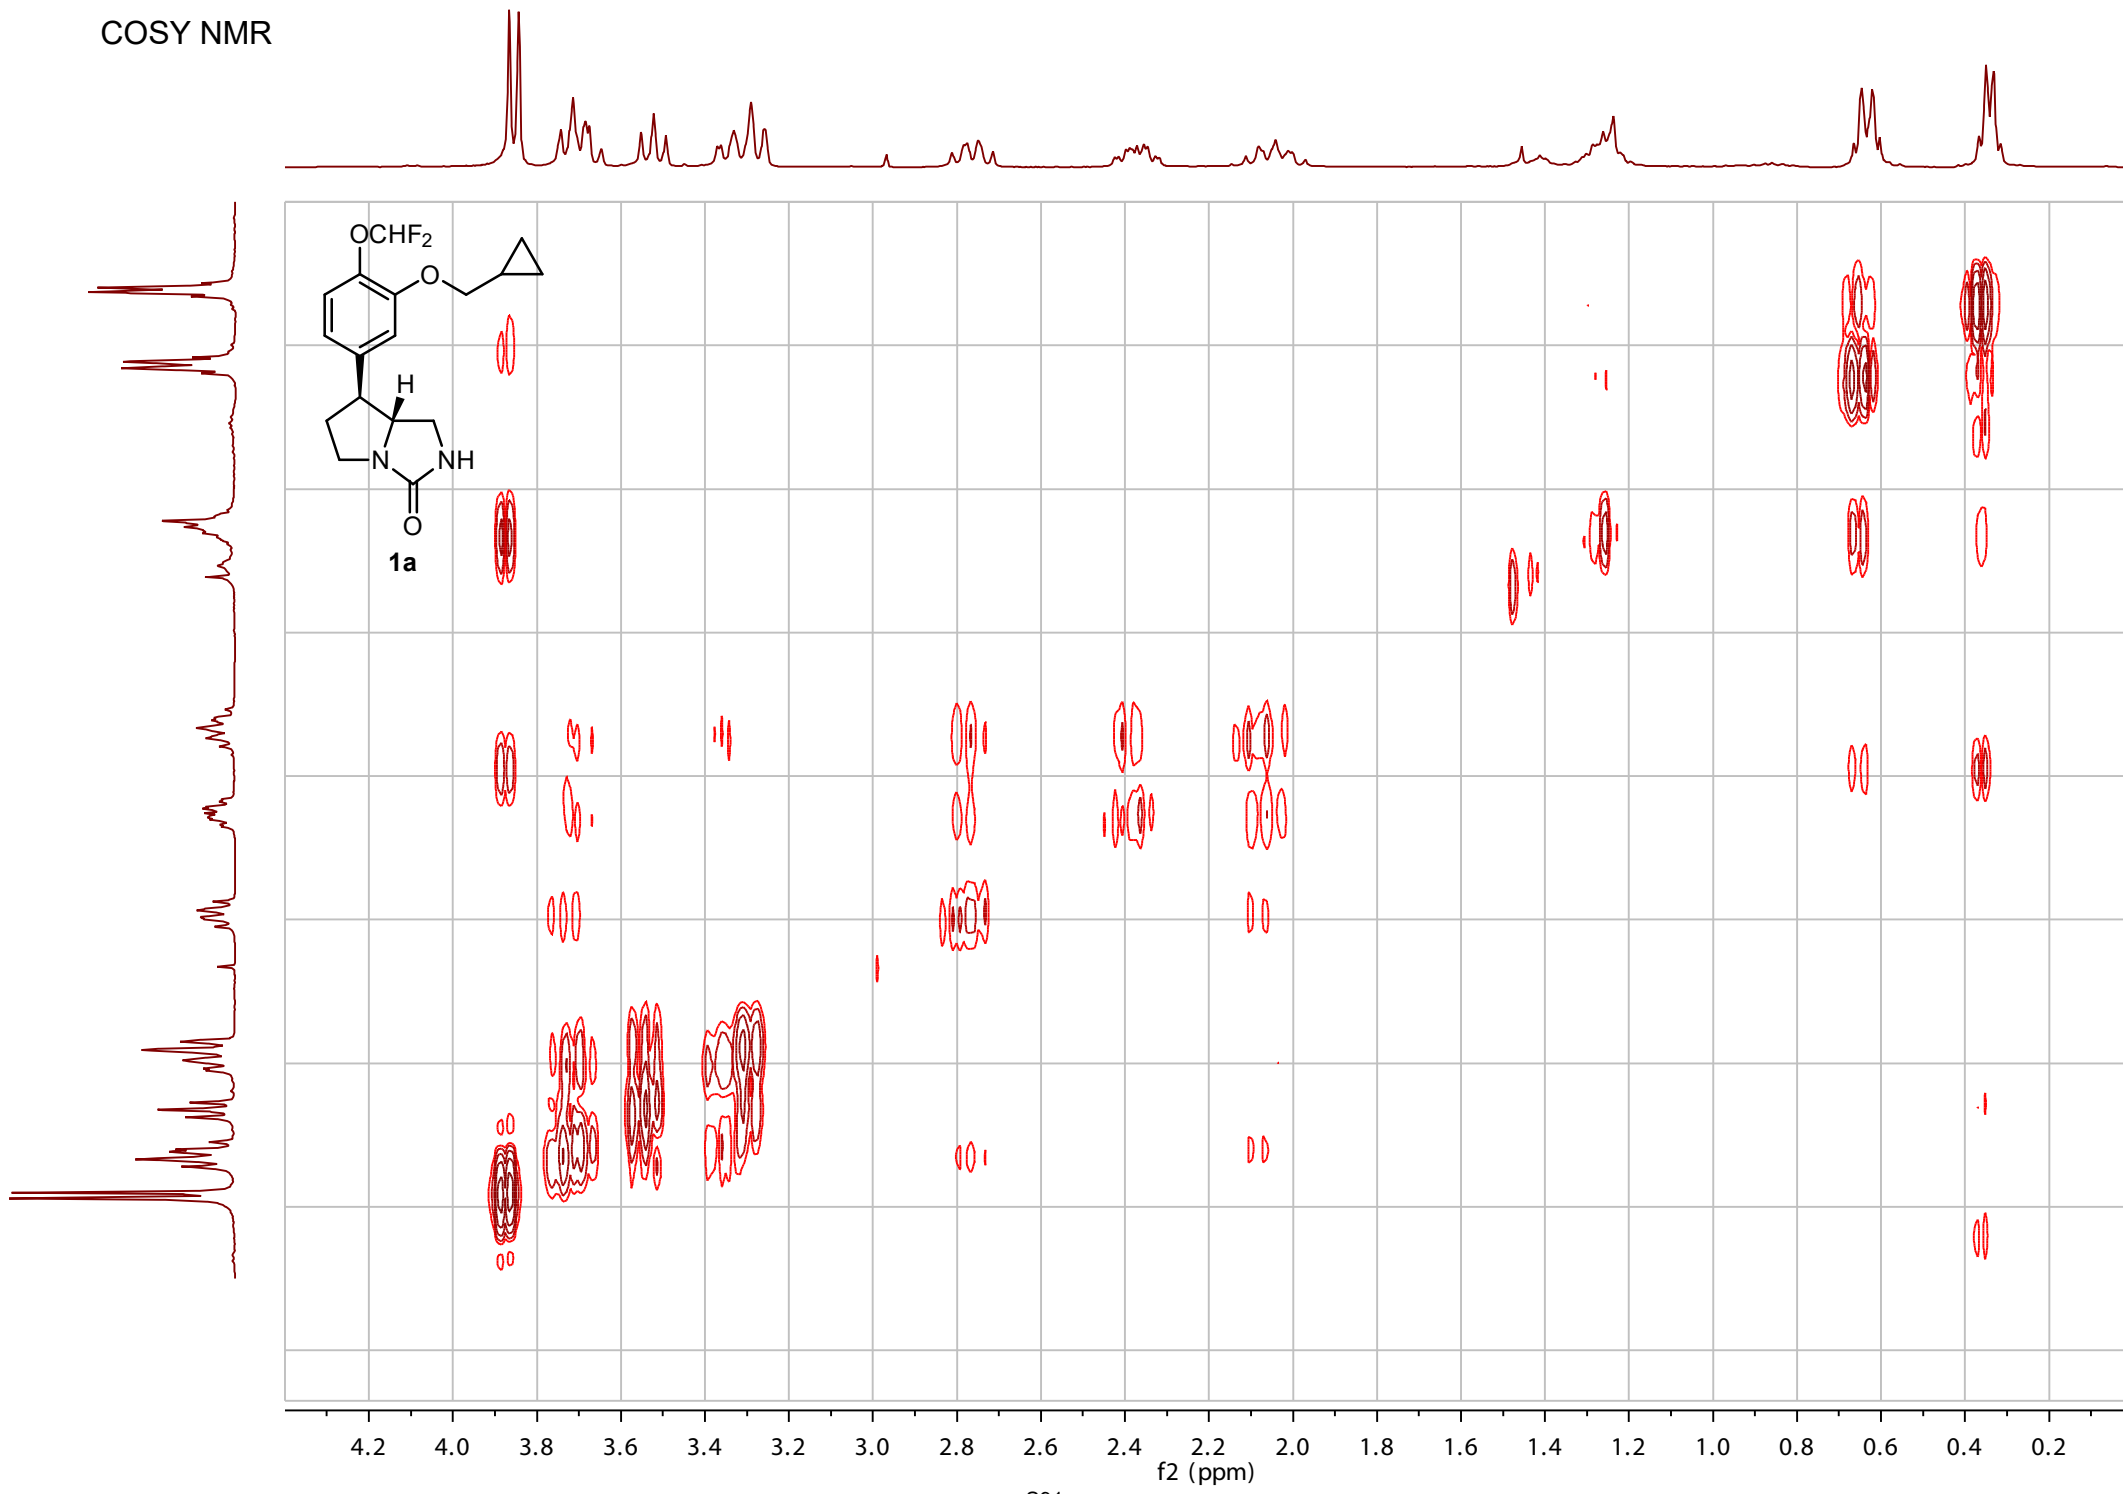

# HSQC NMR

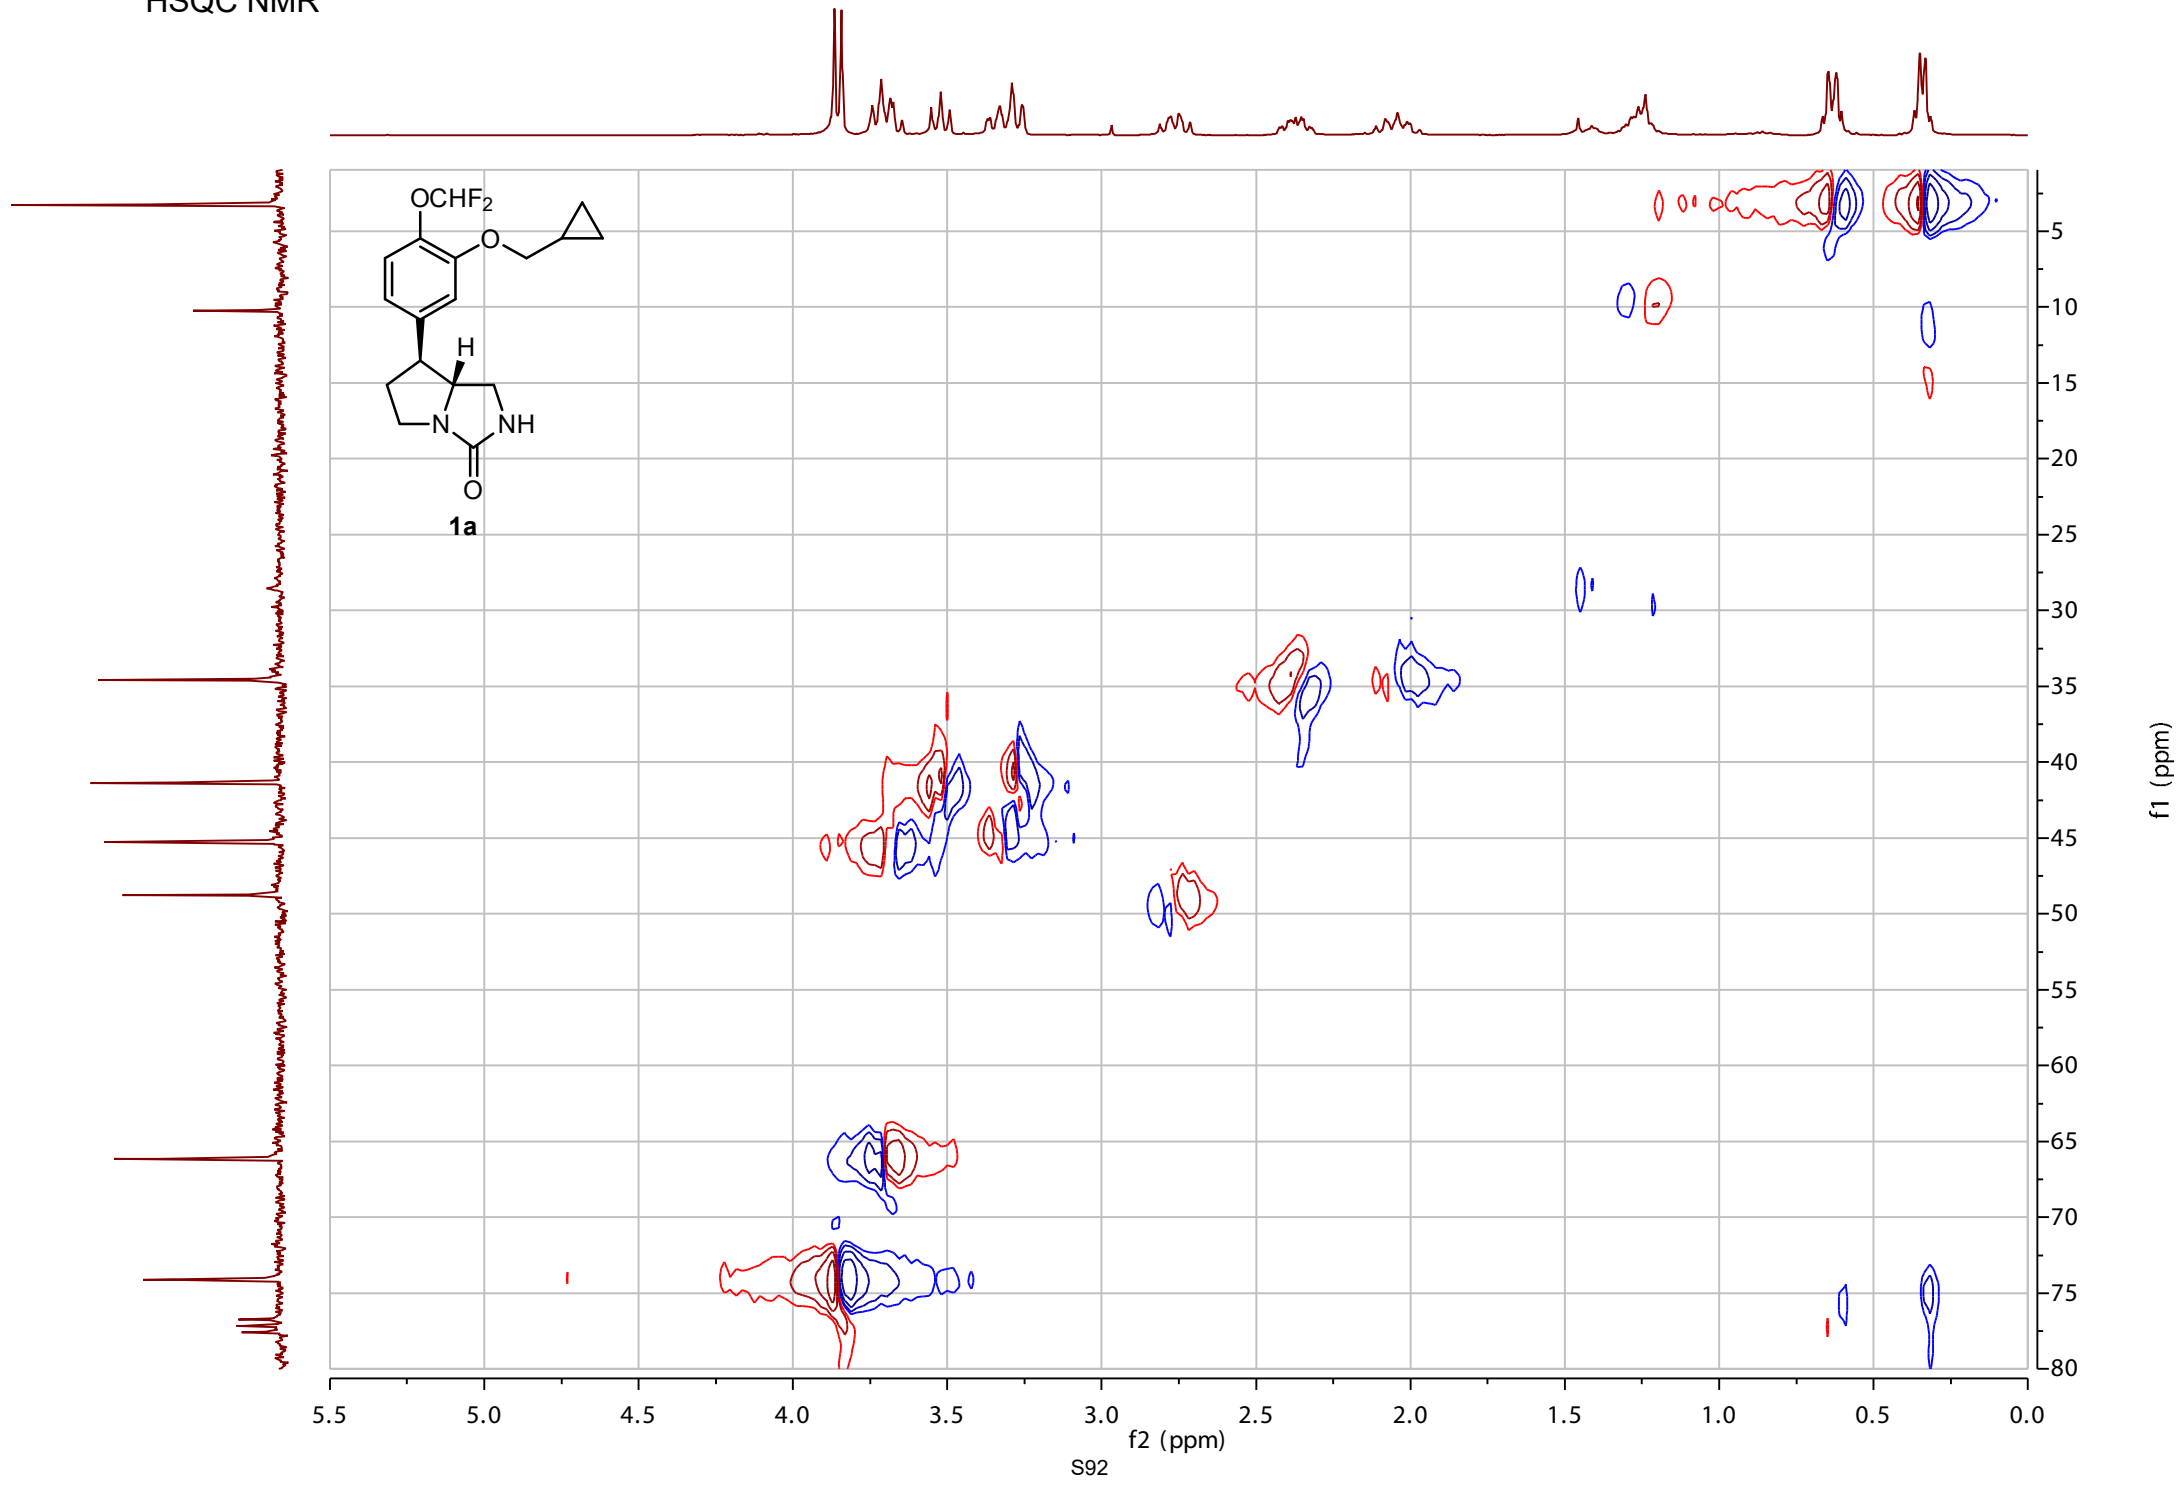

NOESY NMR

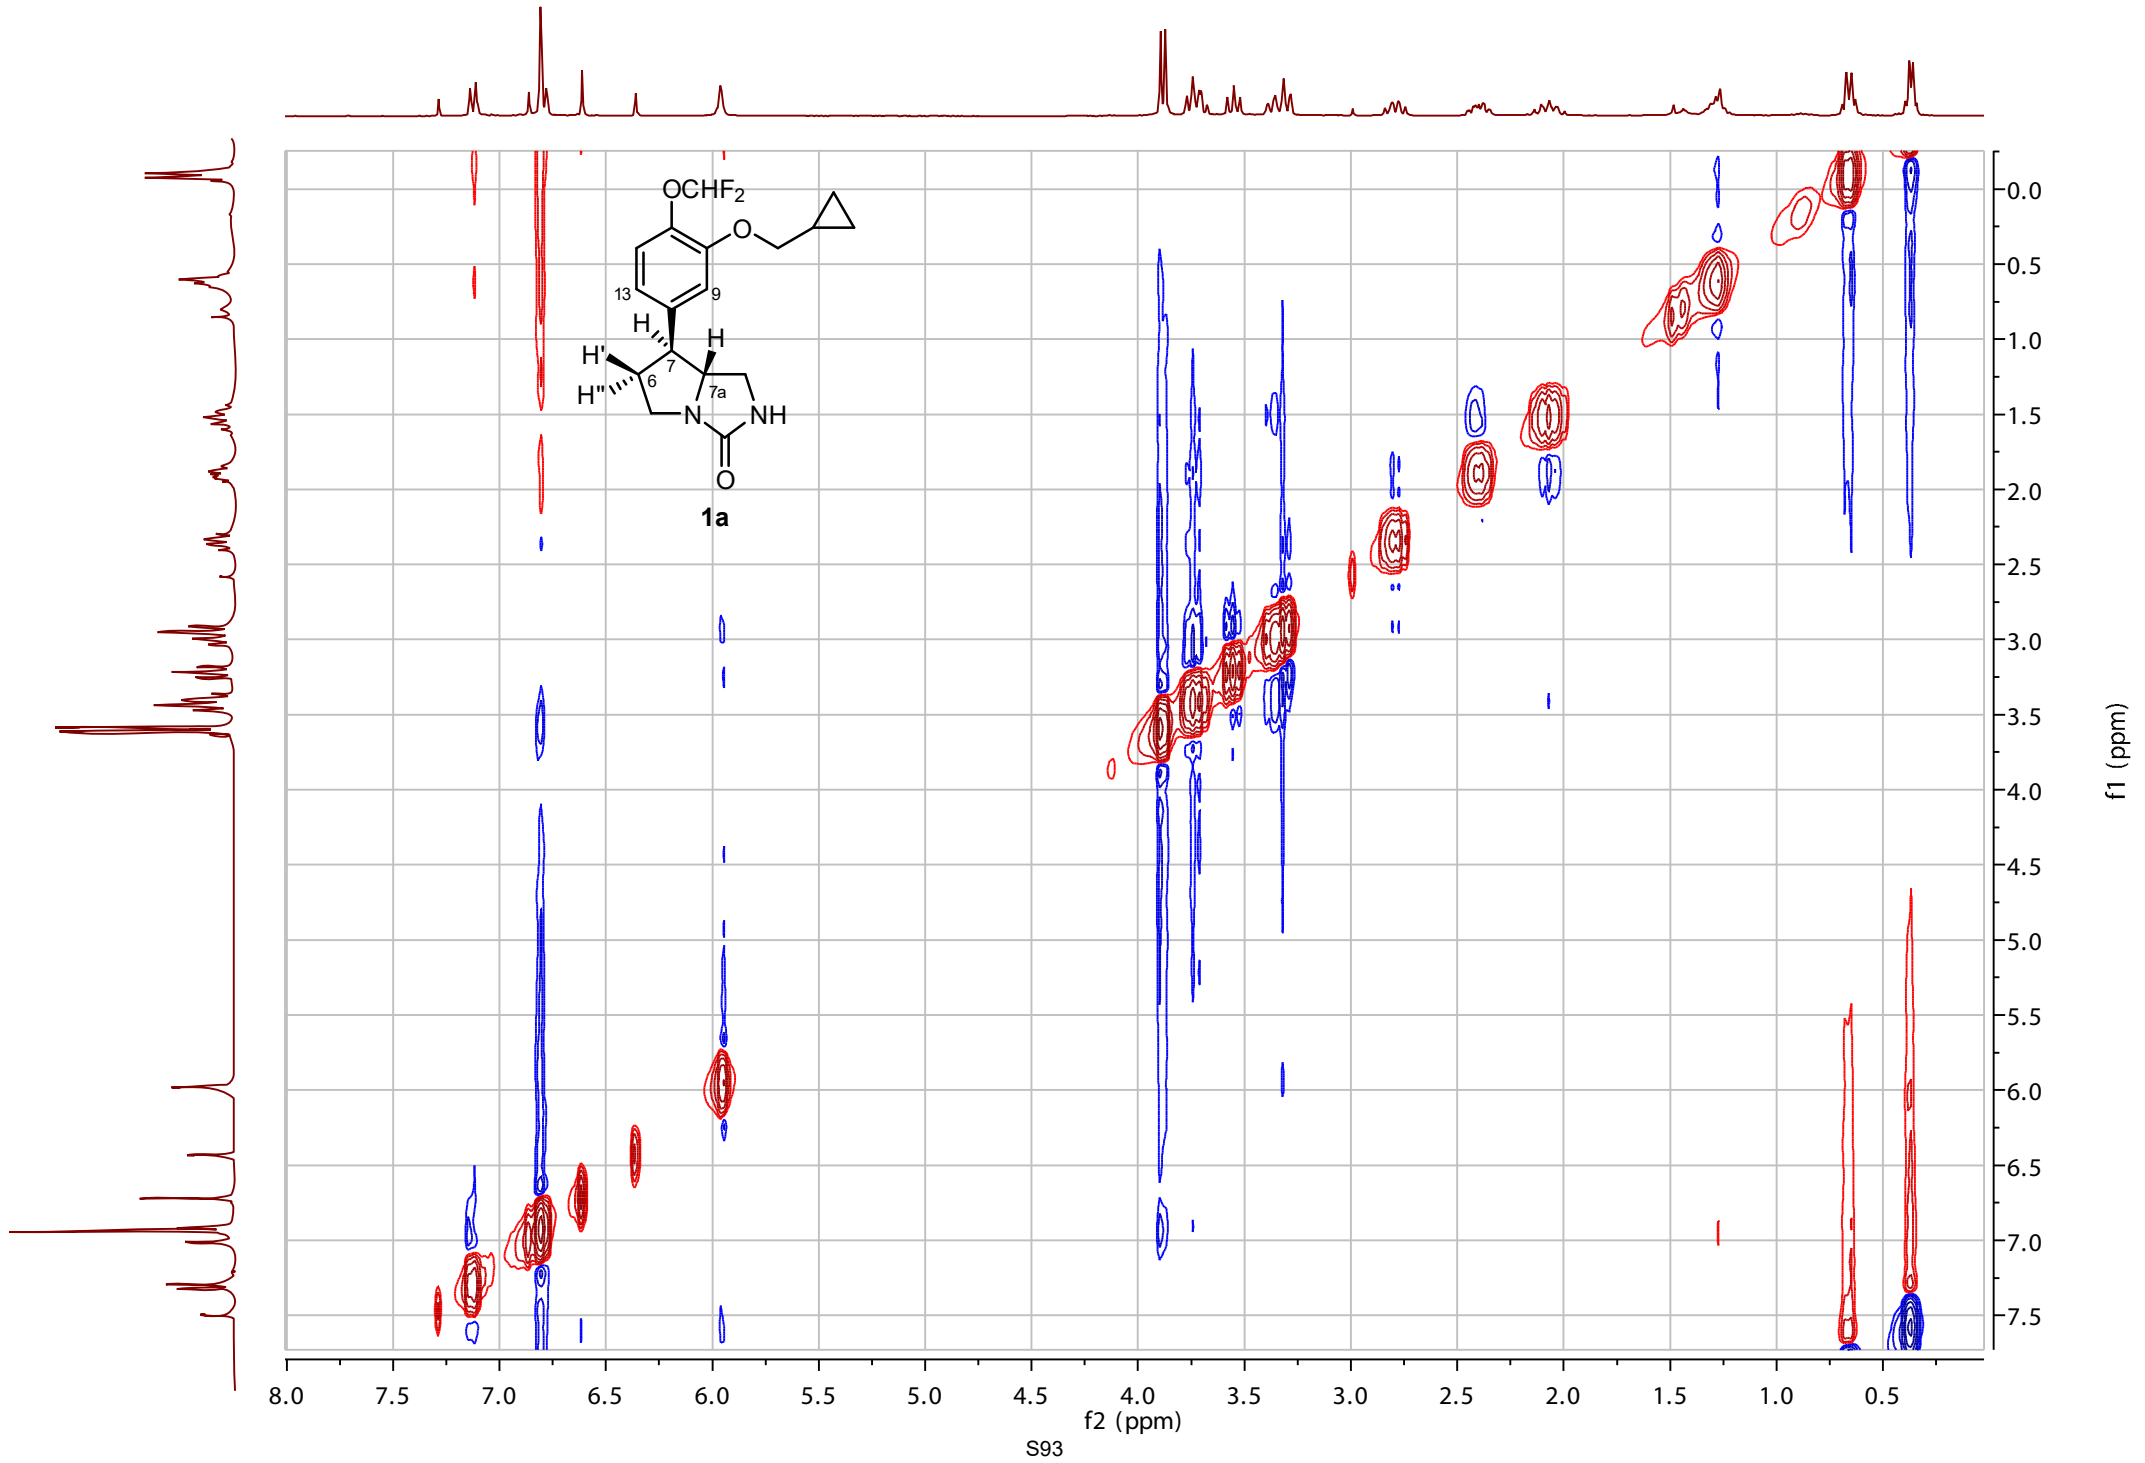

<sup>1</sup>H NMR (300 MHz, CDCl<sub>3</sub>)

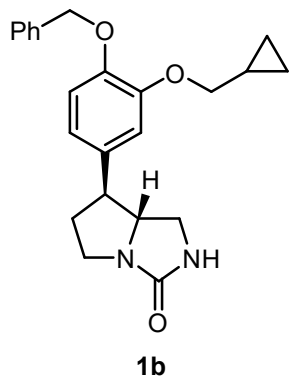

7.44  
7.37  
7.34  
7.26  
6.89  
6.86  
6.77  
6.73  
6.70

5.13  
5.07

3.89  
3.87  
3.72  
3.69  
3.55  
3.52  
3.49  
3.34  
3.30  
3.27

2.75  
2.72

2.34

2.05

1.31  
1.29

0.64  
0.62  
0.37  
0.35

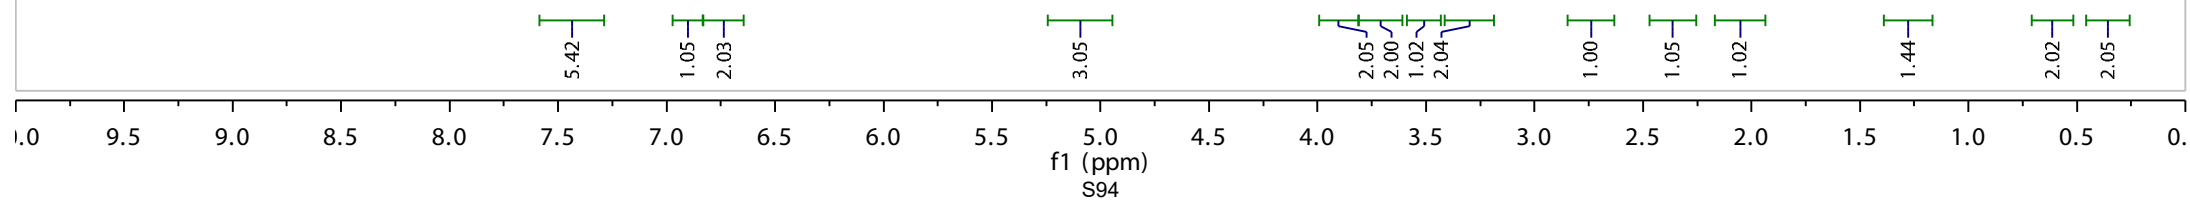

$^{13}\text{C}$  NMR (75 MHz,  $\text{CDCl}_3$ )

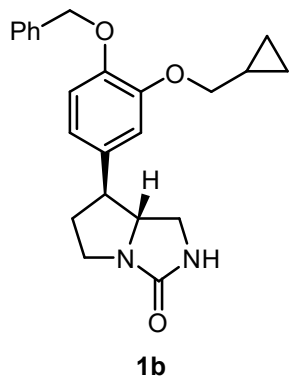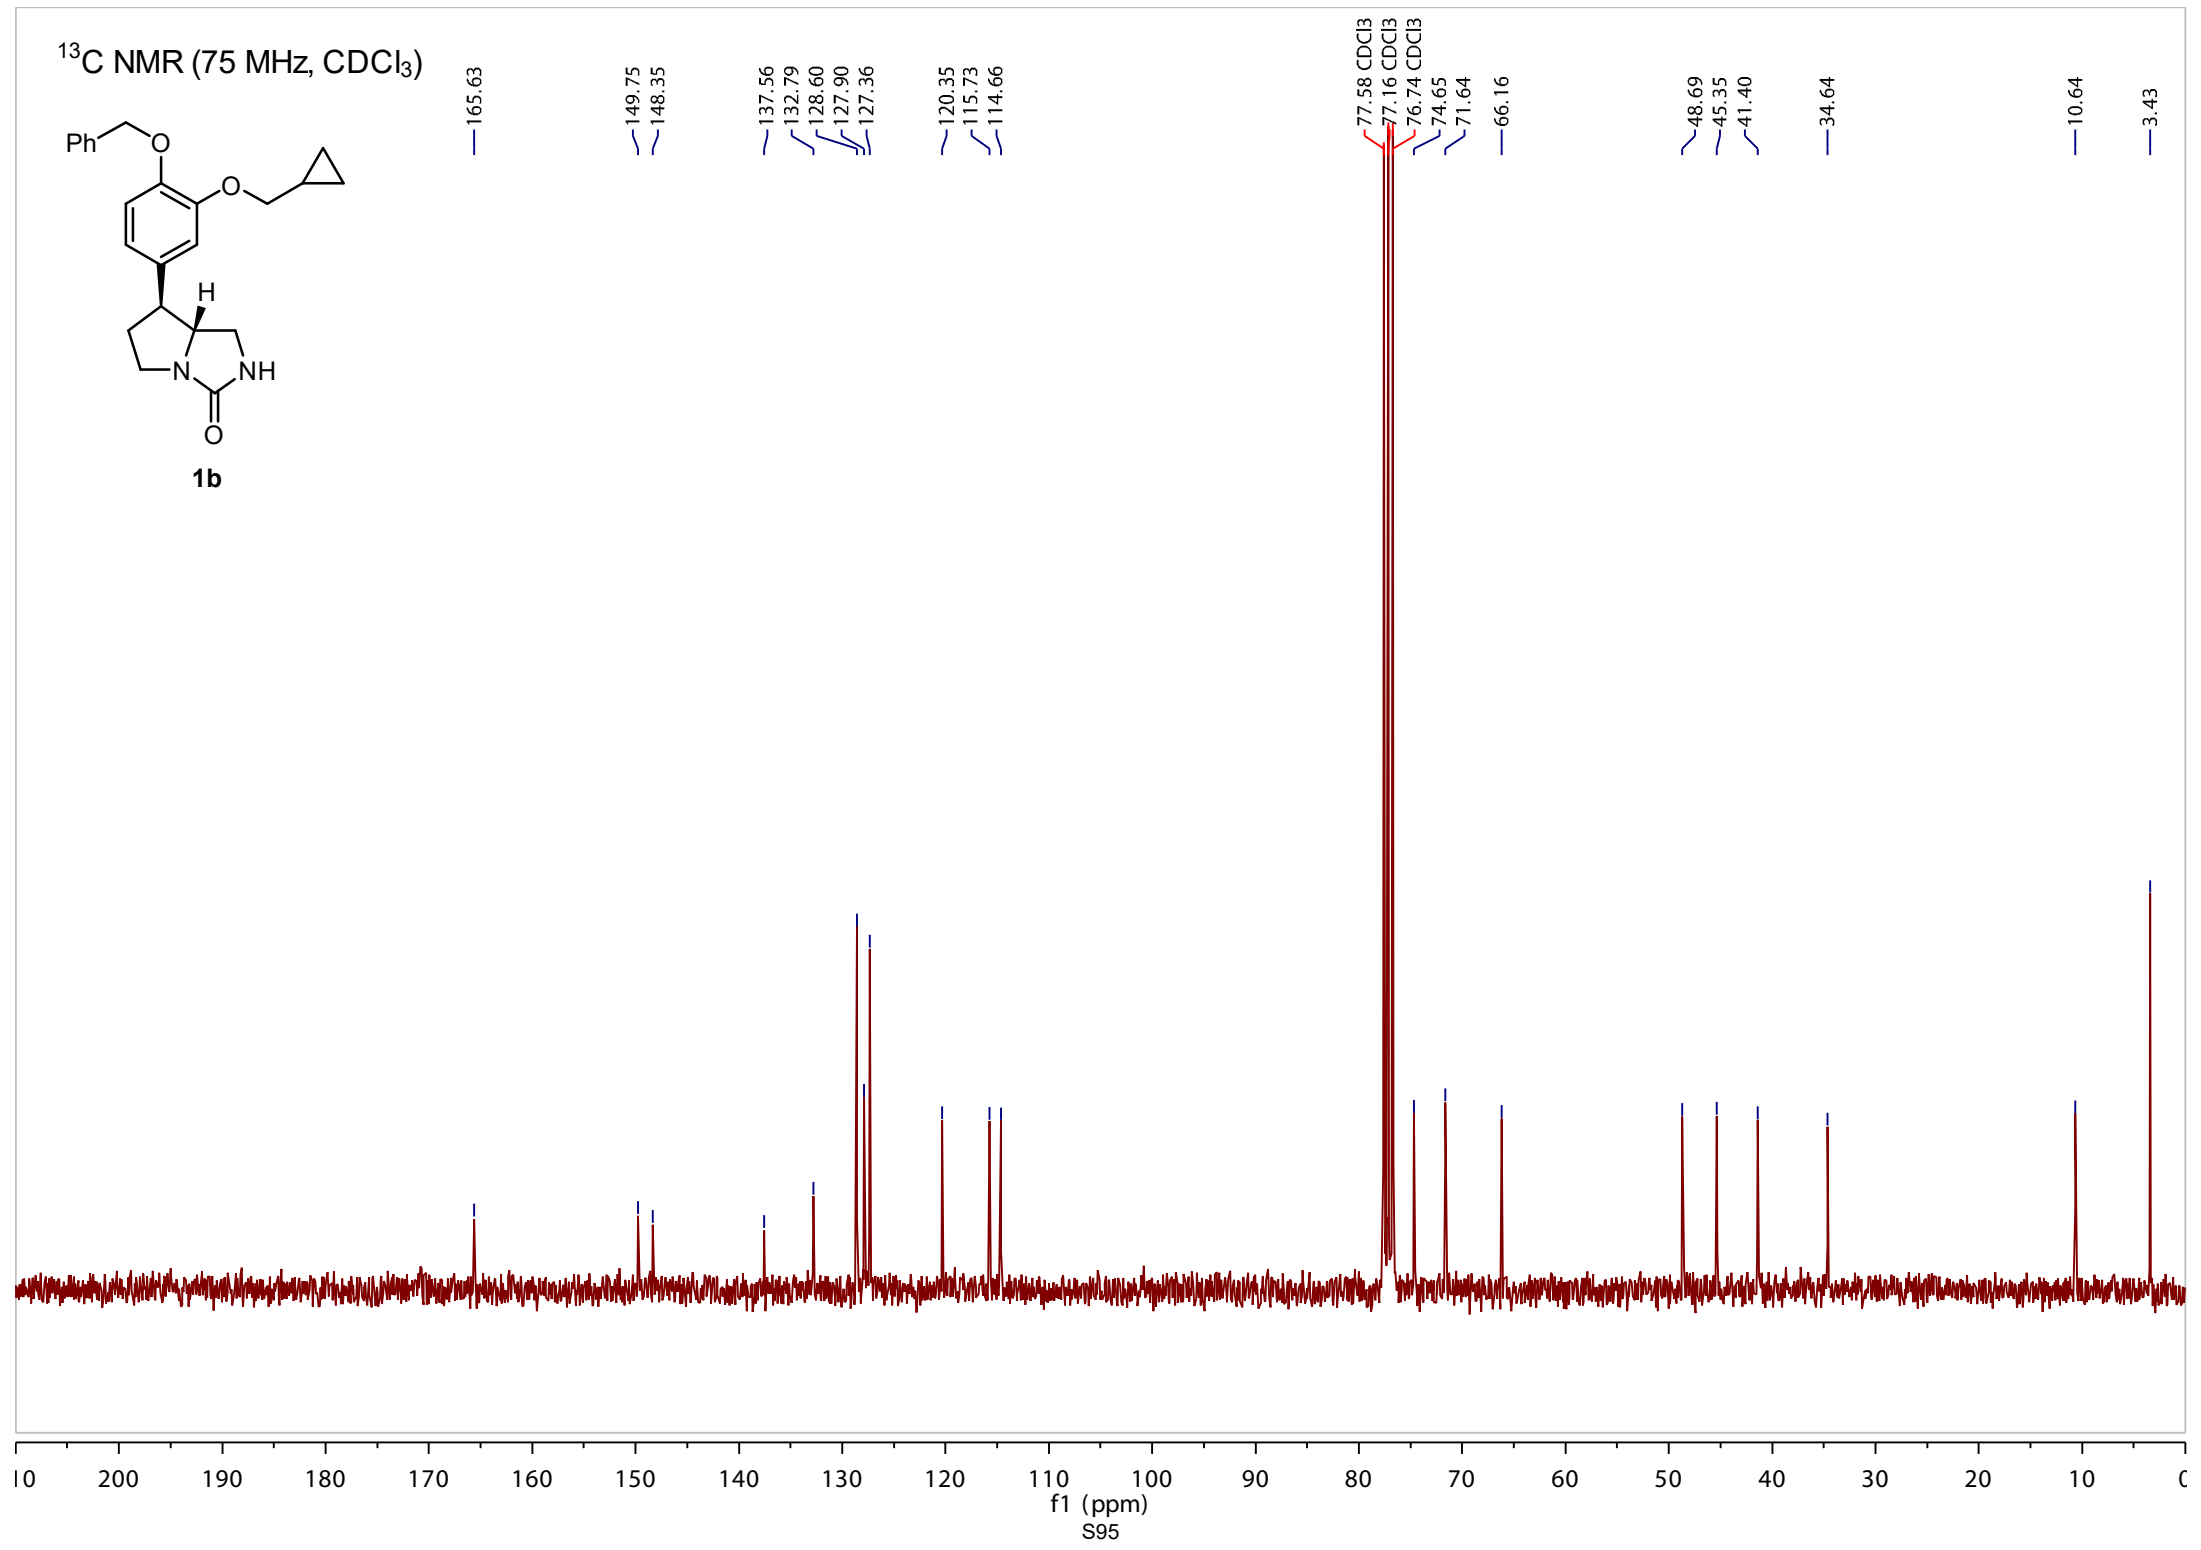

<sup>1</sup>H NMR (300 MHz, CDCl<sub>3</sub>)

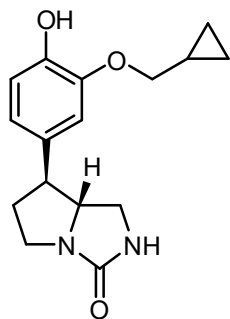

**1c**

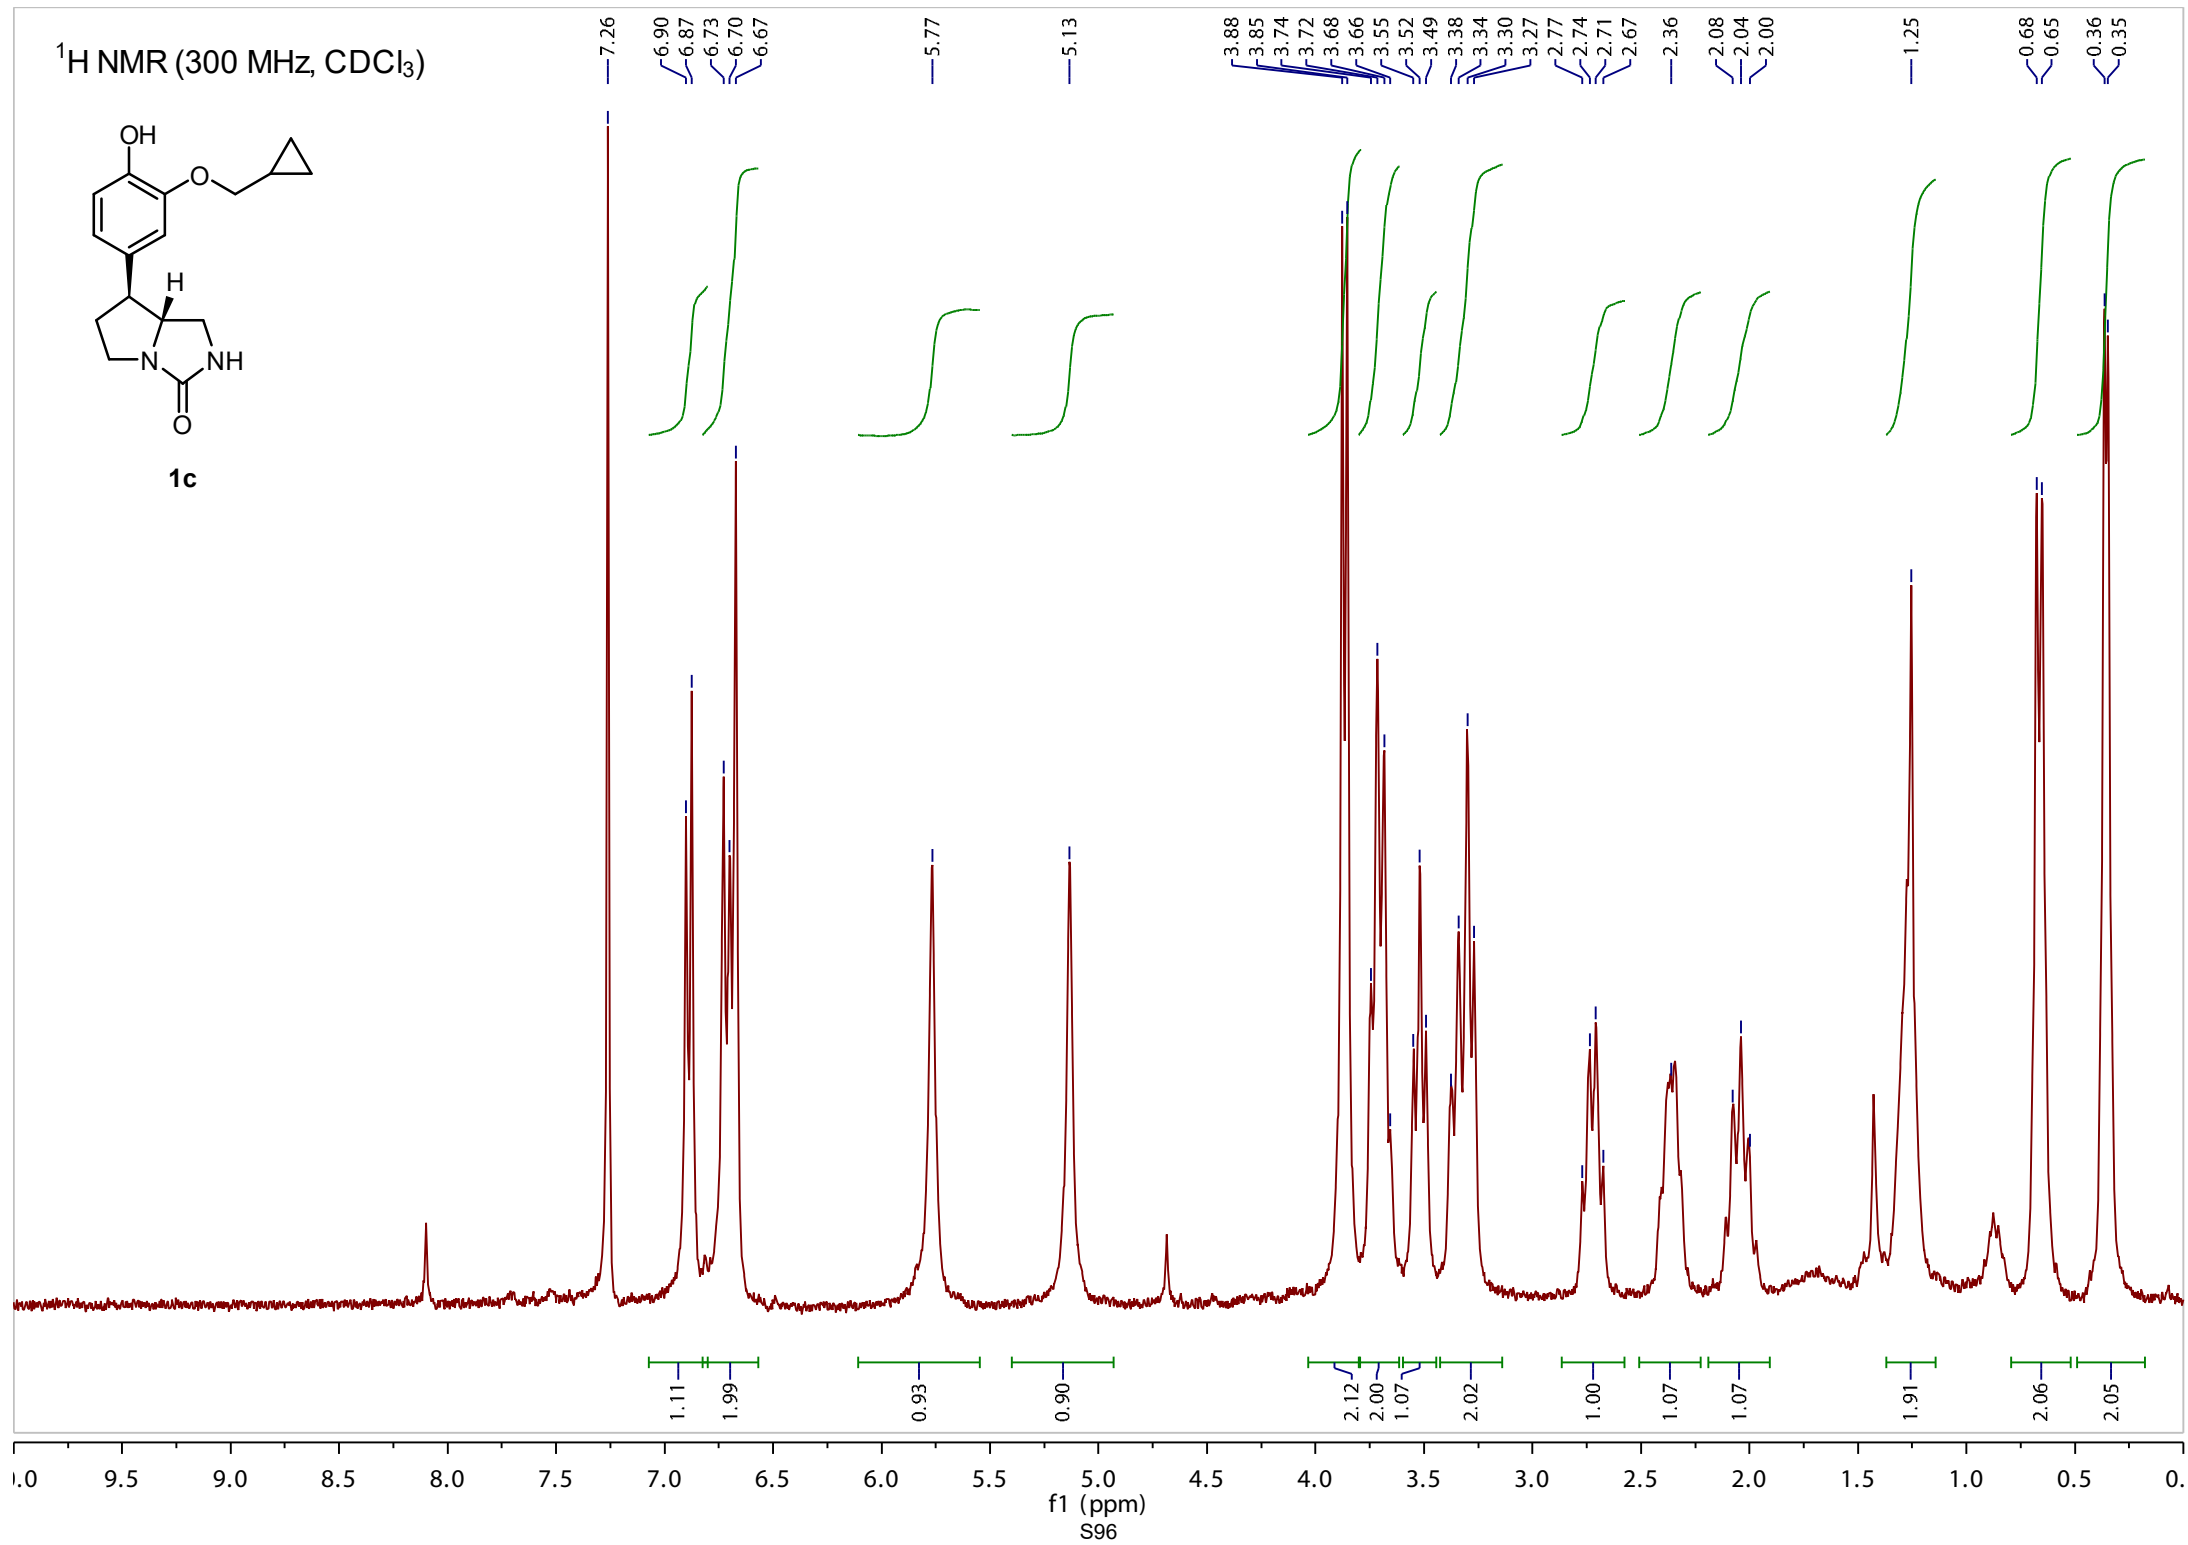



$^{13}\text{C}$  NMR (75 MHz,  $\text{CDCl}_3$ )

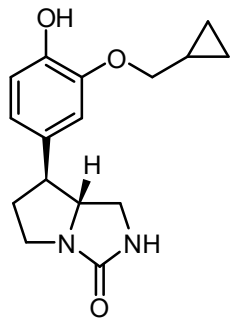

**1c**

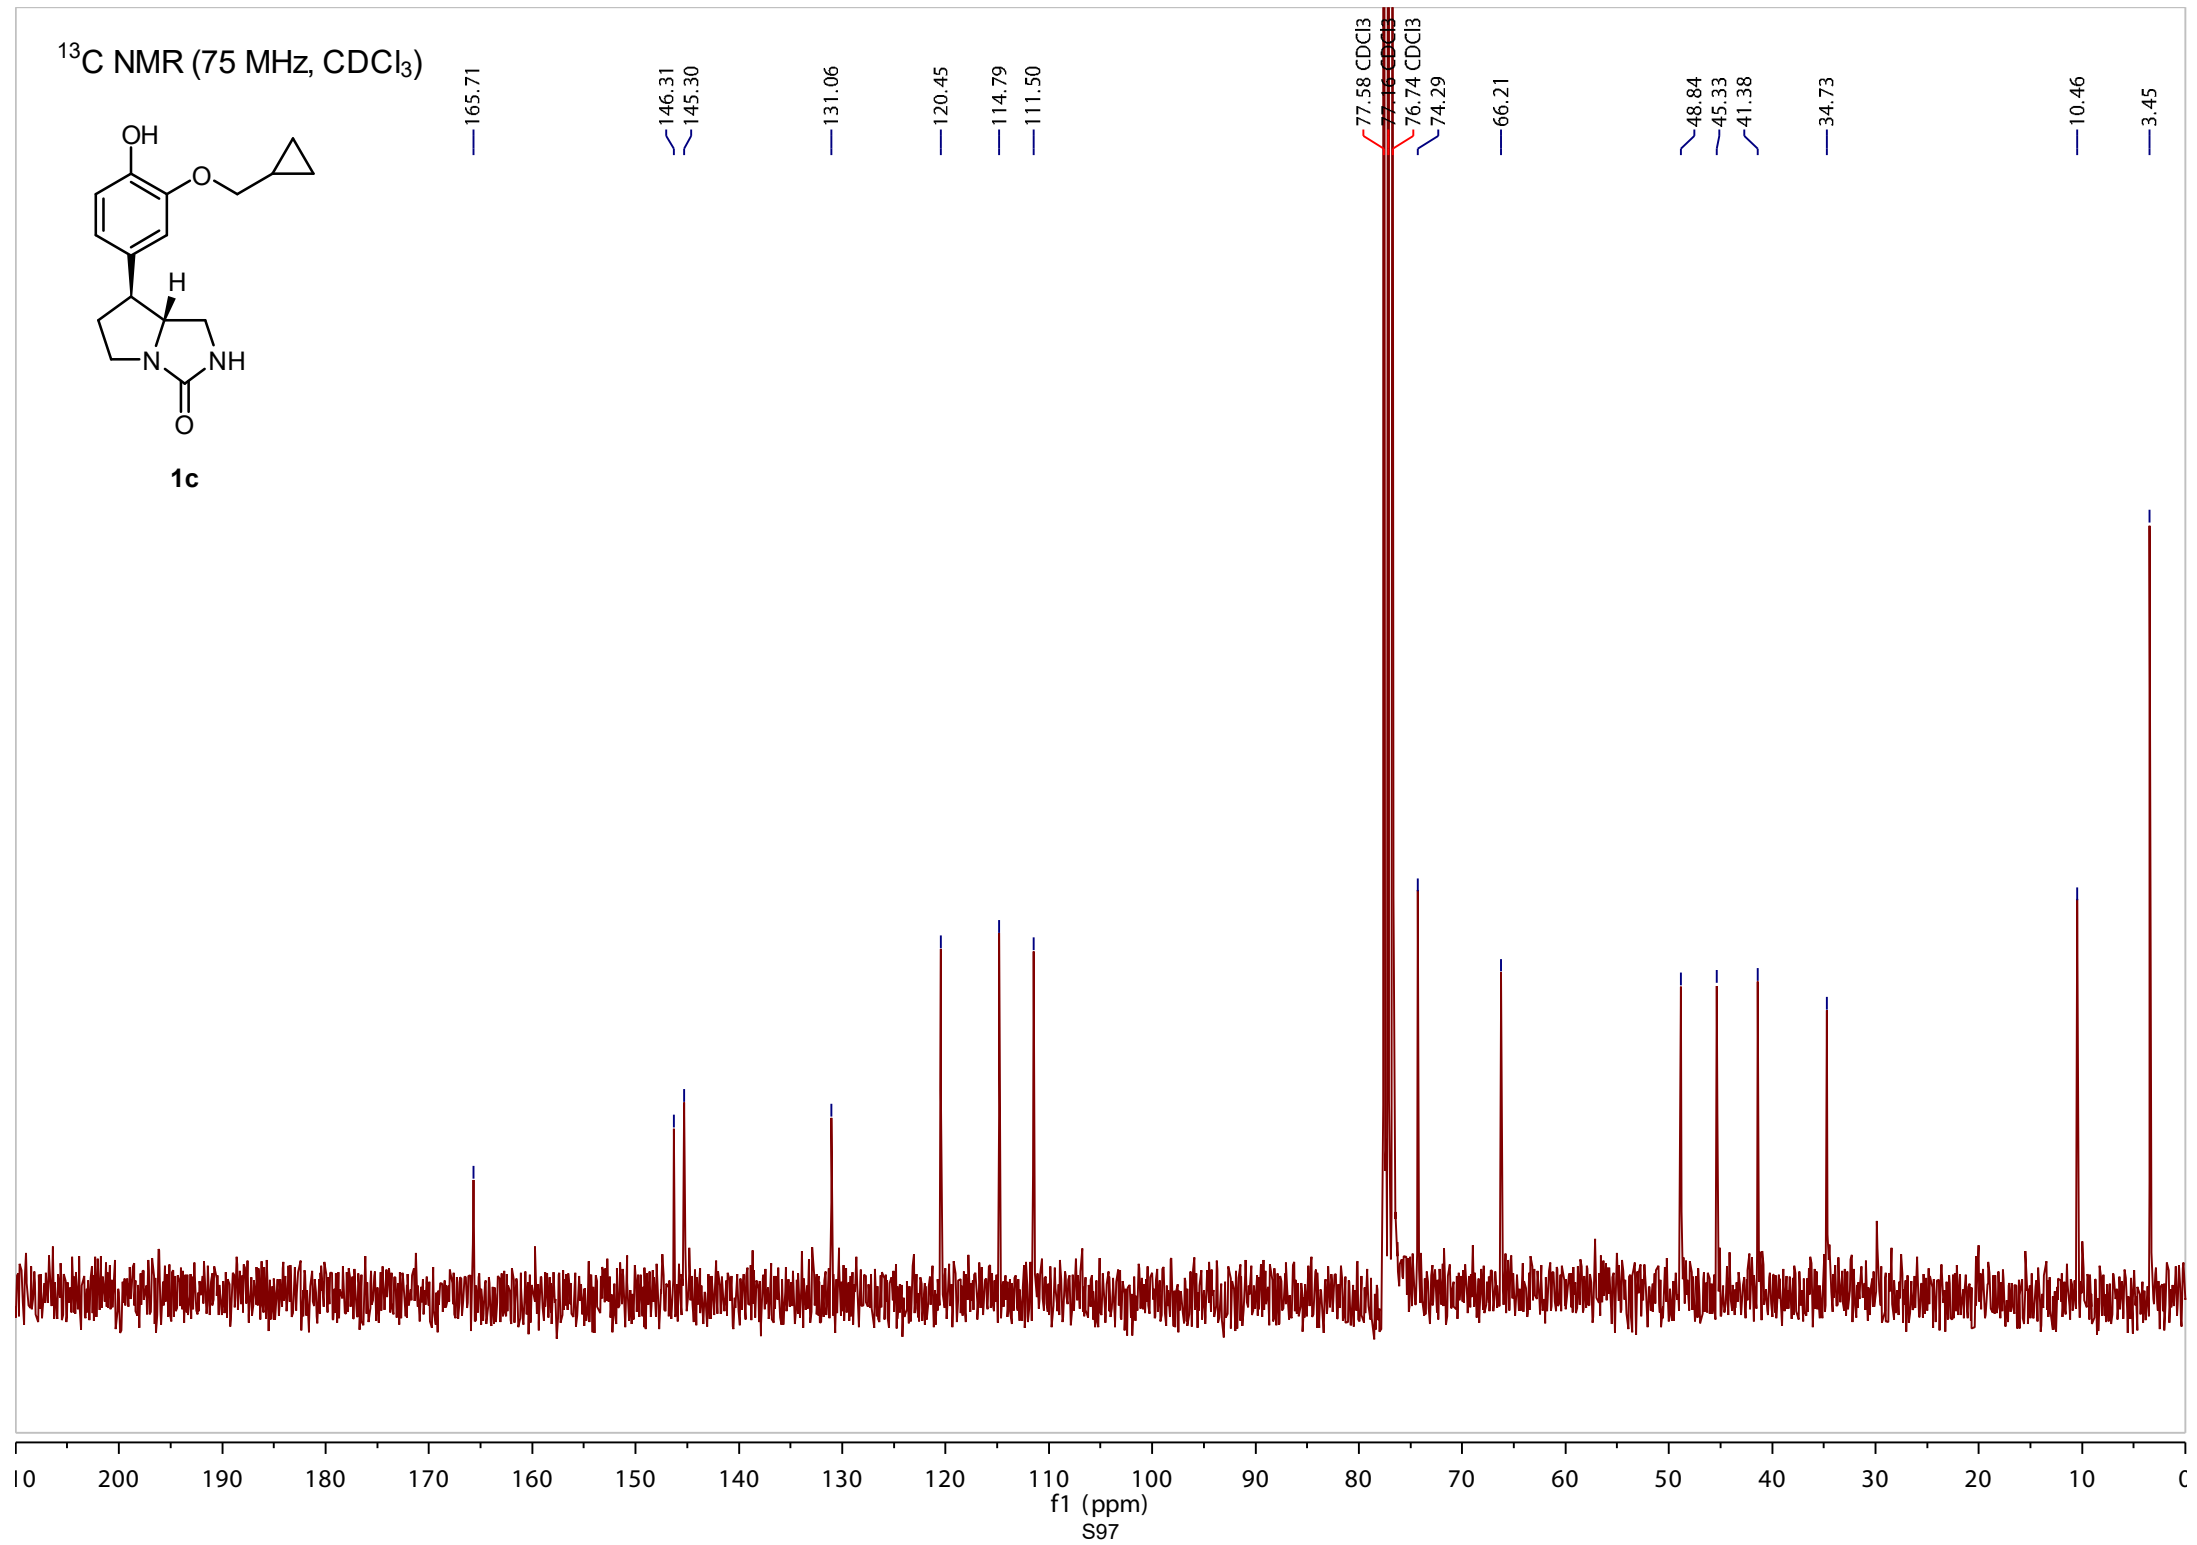

<sup>1</sup>H NMR (300 MHz, CDCl<sub>3</sub>)

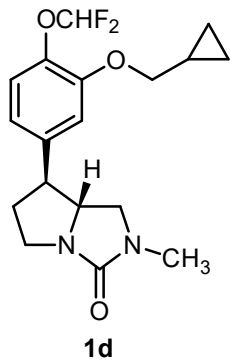

7.26  
7.14  
7.11  
6.86  
6.79  
6.77  
6.60  
6.35

3.88  
3.86  
3.74  
3.70  
3.62  
3.59  
3.44  
3.41  
3.38  
3.37  
3.24  
3.21  
2.84  
2.69  
2.67  
2.38  
2.37  
2.34  
2.07  
2.03  
1.99

0.67  
0.64  
0.38  
0.37  
0.35  
0.33

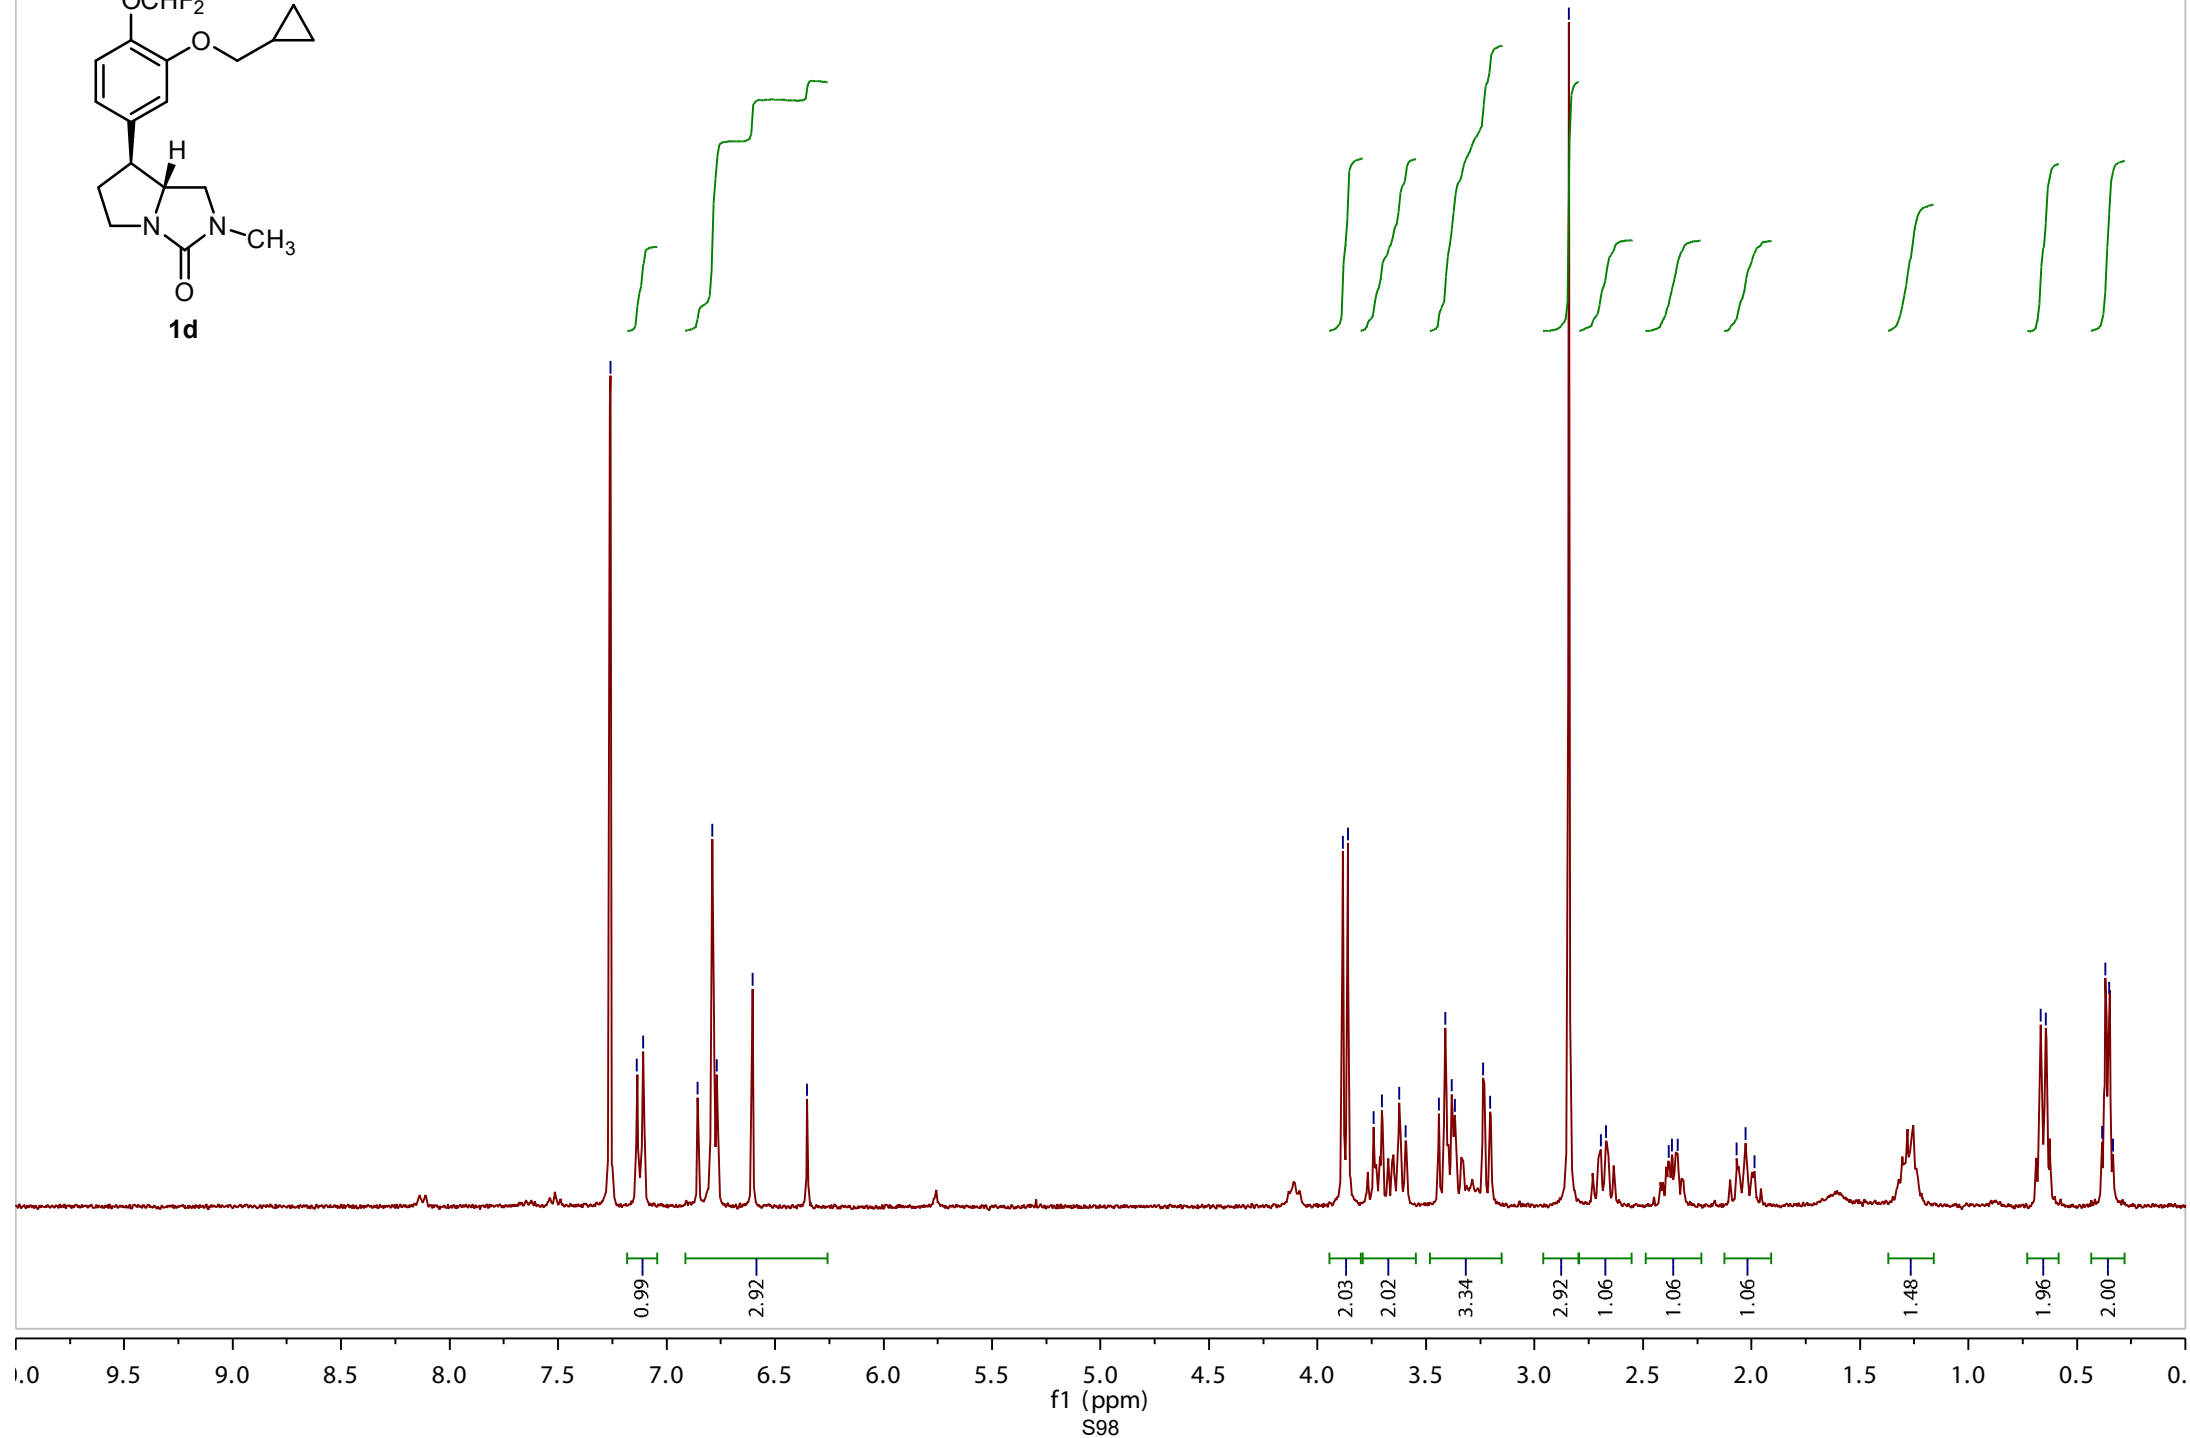

$^{13}\text{C}$  NMR (75 MHz,  $\text{CDCl}_3$ )

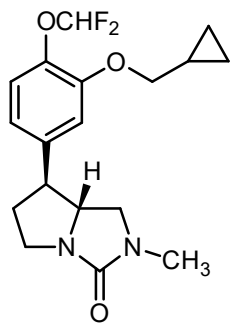

**1d**

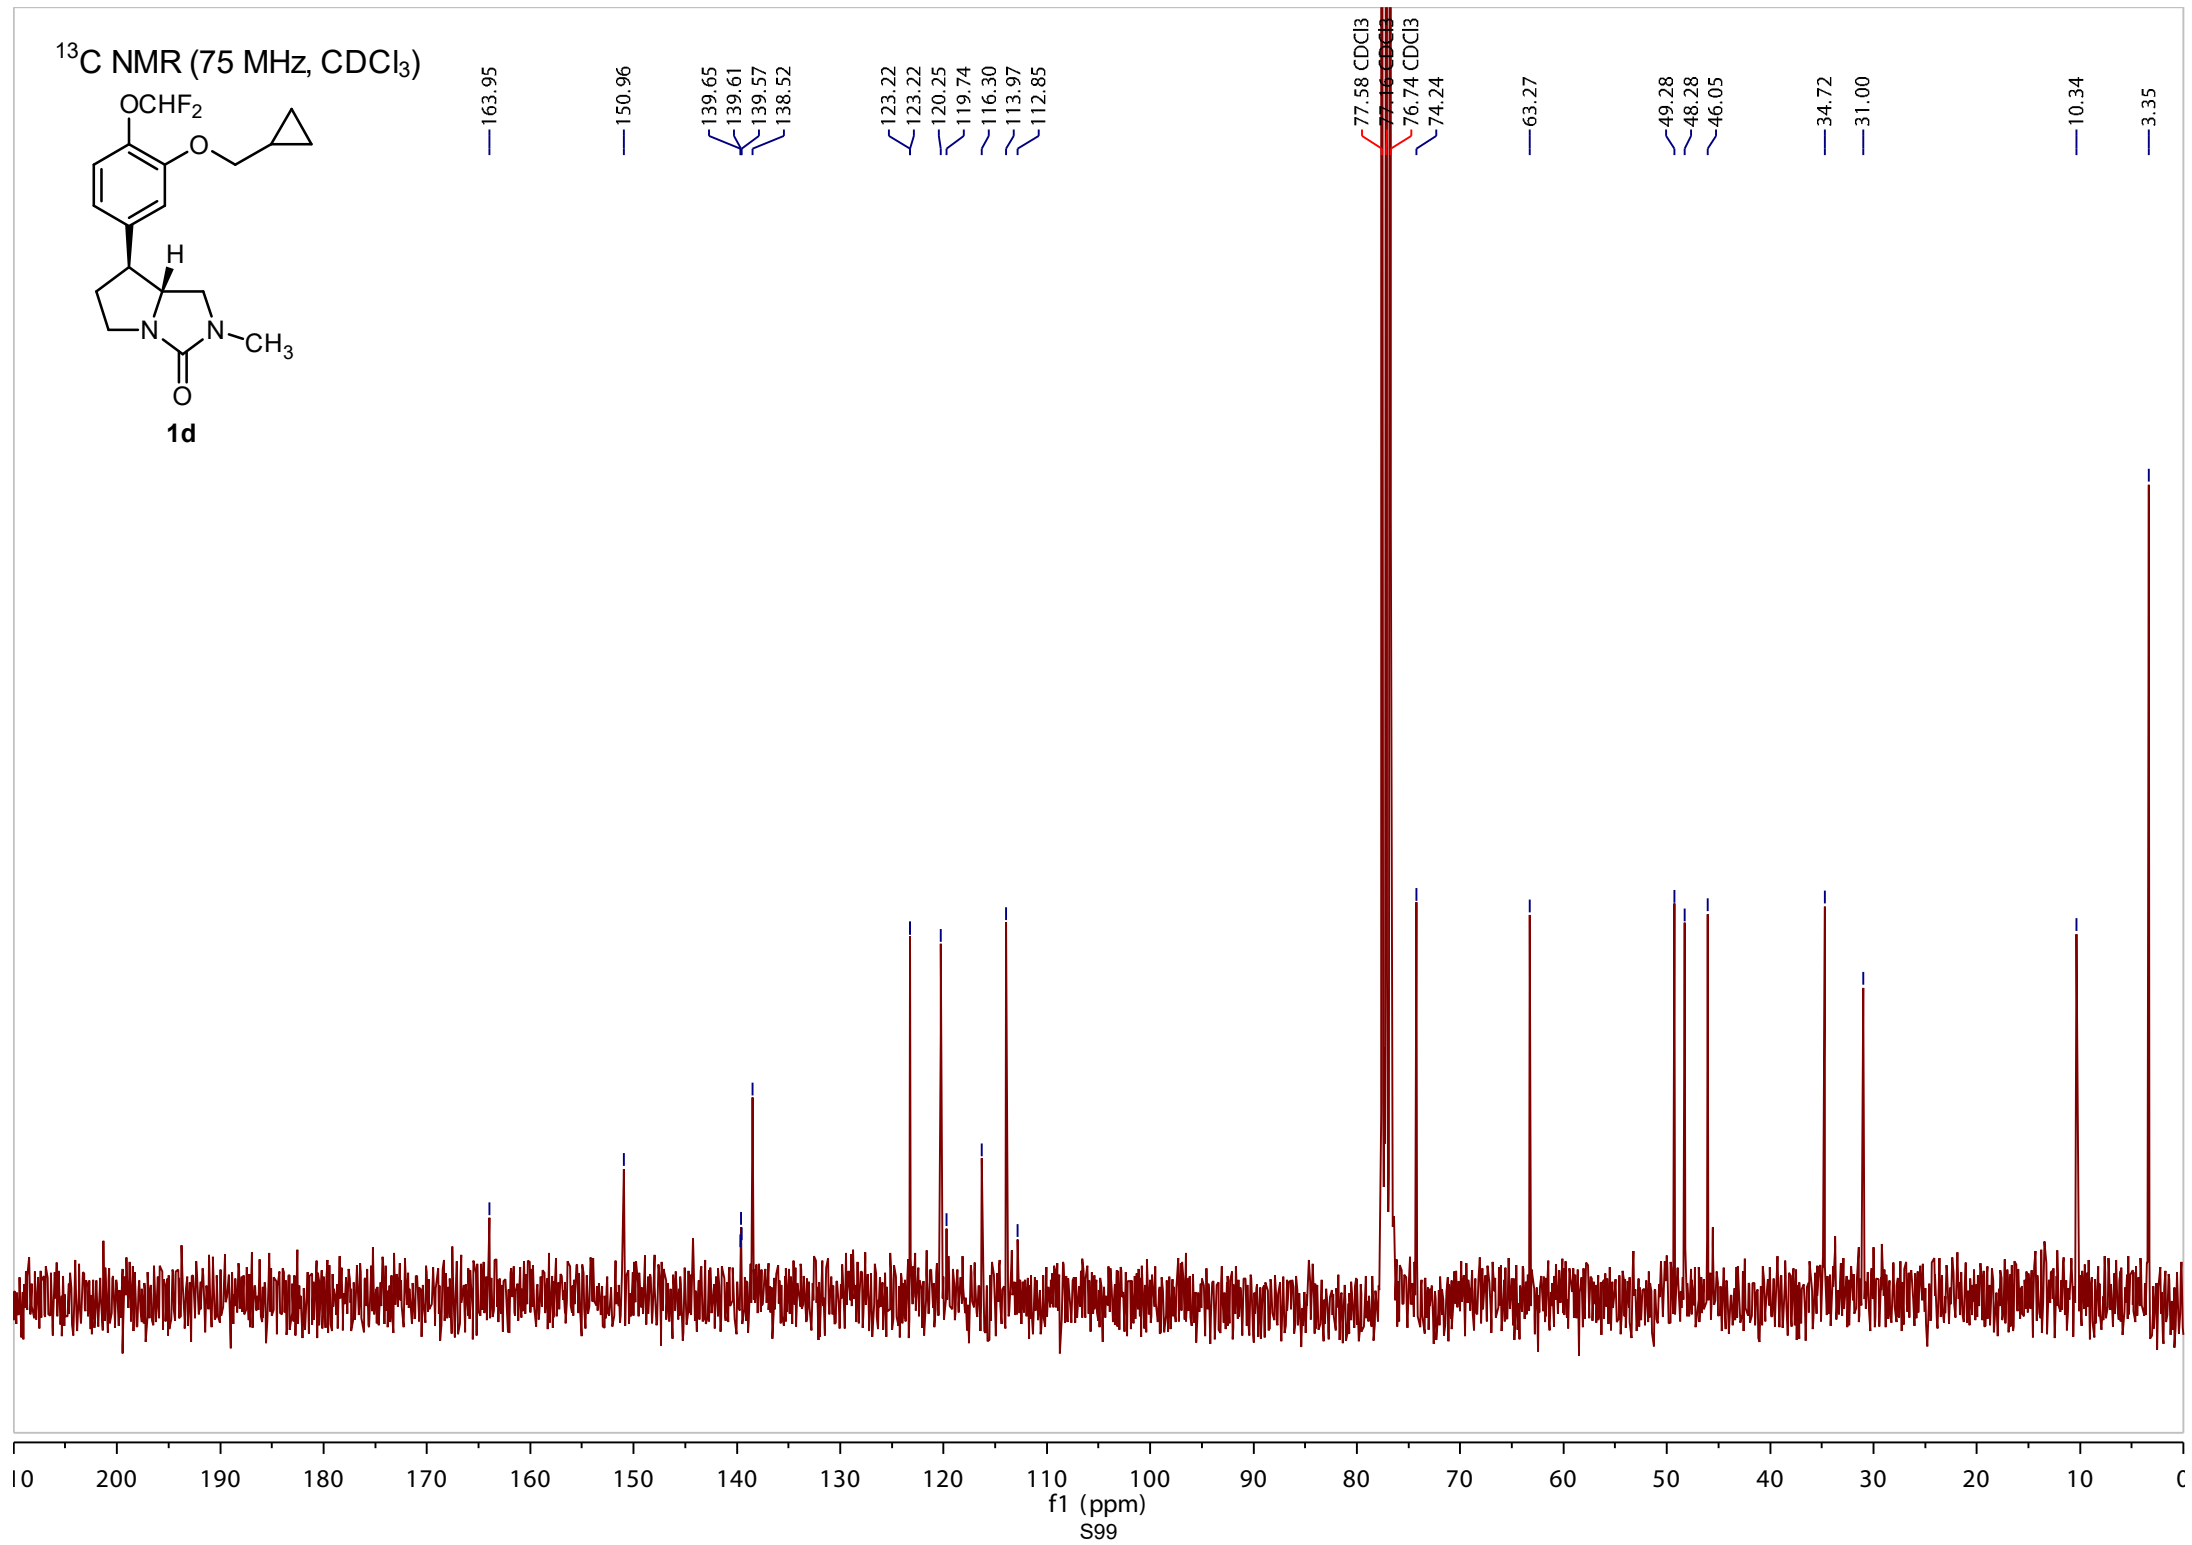

$^{19}\text{F}$  NMR (282 MHz,  $\text{CDCl}_3$ )

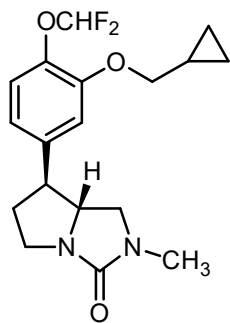

**1d**

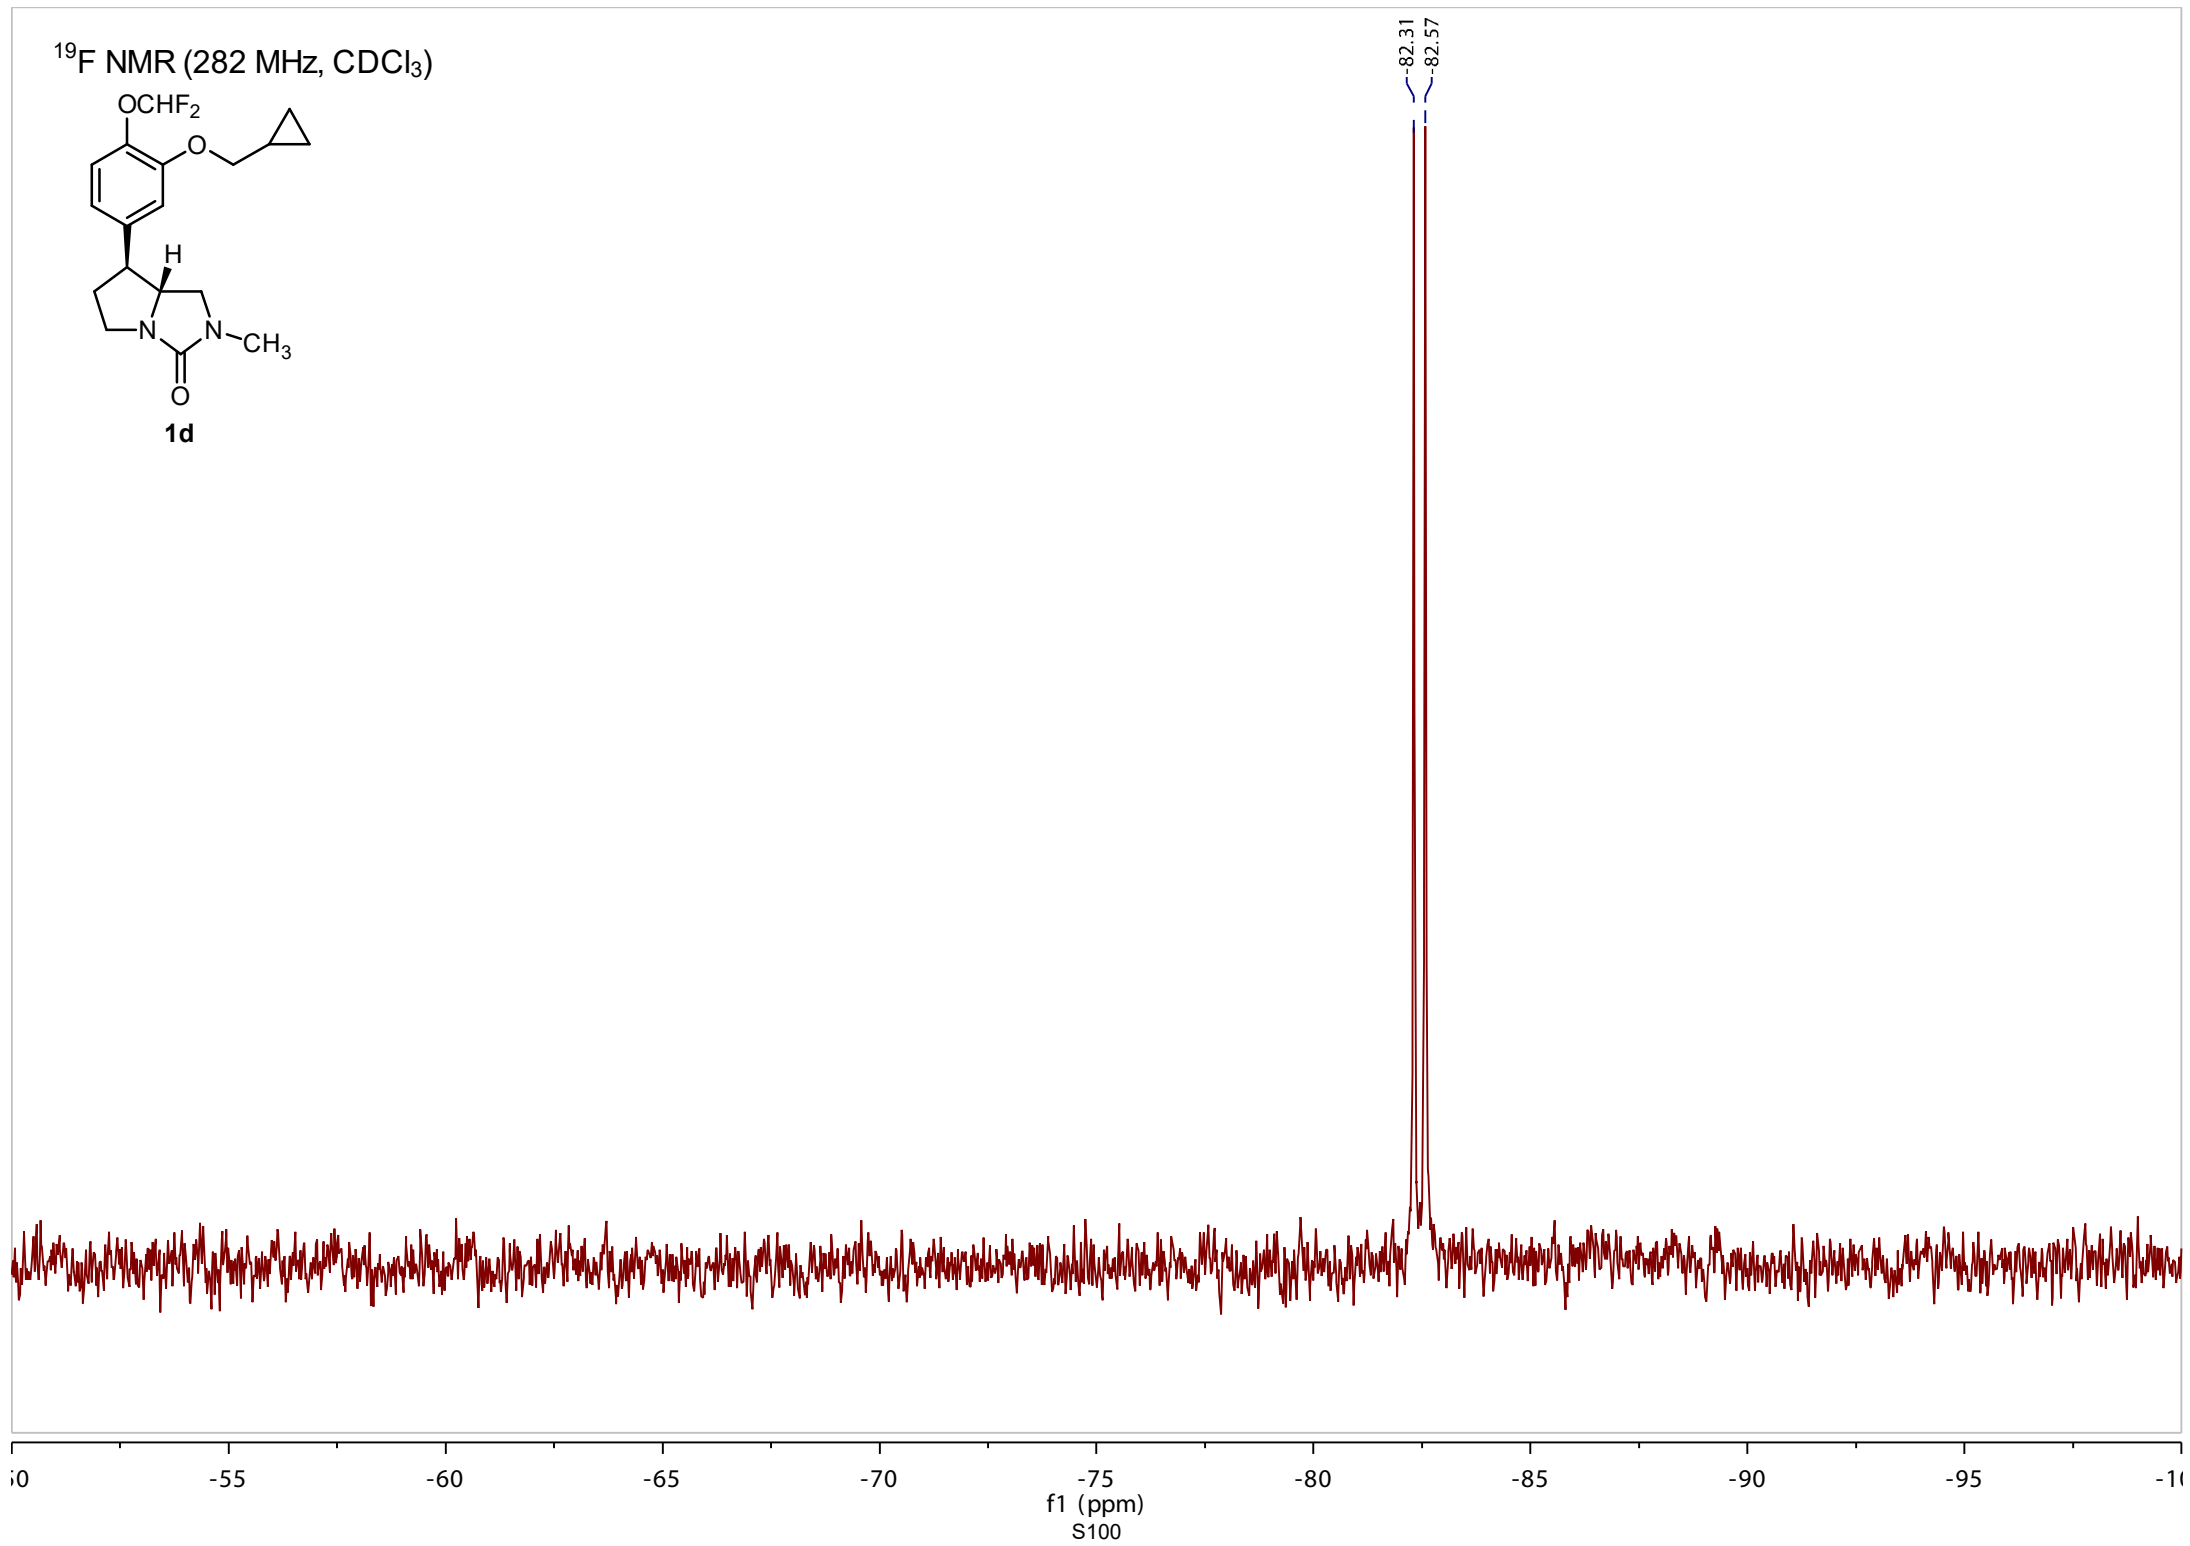

<sup>1</sup>H NMR (300 MHz, CDCl<sub>3</sub>)

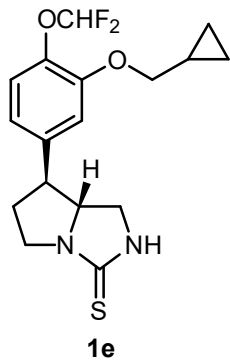

7.26  
7.14  
7.11  
6.85  
6.78  
6.75  
6.60  
6.50  
6.35

4.11  
4.08  
4.07  
3.88  
3.85  
3.74  
3.70  
3.67  
3.62  
3.58  
3.55  
3.50  
3.48  
3.46  
3.45  
2.85  
2.82  
2.50  
2.46  
2.45  
2.19  
2.15  
2.11

1.27

0.66  
0.64  
0.36  
0.35

1.0 9.5 9.0 8.5 8.0 7.5 7.0 6.5 6.0 5.5 5.0 4.5 4.0 3.5 3.0 2.5 2.0 1.5 1.0 0.5 0.0  
f1 (ppm)  
S101

0.94

3.97

2.05

2.09

1.07

1.08

0.99

1.02

1.03

1.11

1.17

2.02

2.00

<sup>13</sup>C NMR (75 MHz, CDCl<sub>3</sub>)

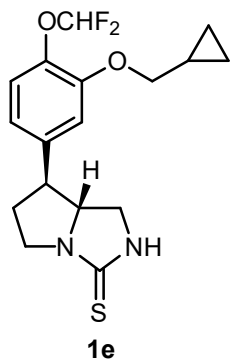

187.12

151.04

139.76

137.32

123.32

119.96

119.66

116.22

113.84

112.77

77.58 CDCl<sub>3</sub>

77.16 CDCl<sub>3</sub>

76.74 CDCl<sub>3</sub>

74.22

69.33

49.02

47.52

45.87

34.56

10.28

3.33

f1 (ppm)  
S102

$^{19}\text{F}$  NMR (282 MHz,  $\text{CDCl}_3$ )

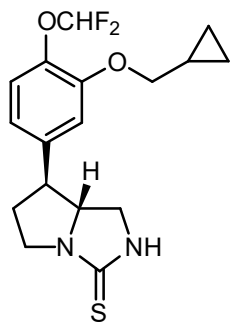

**1e**

-82.34  
-82.61

f1 (ppm)  
S103

<sup>1</sup>H NMR (300 MHz, CDCl<sub>3</sub>)

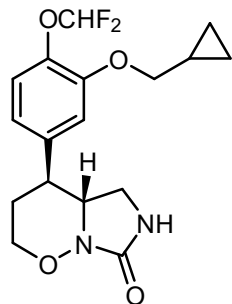

2a

7.26  
7.15  
7.12  
6.86  
6.80  
6.78  
6.61  
6.35  
5.47  
4.09  
4.08  
4.02  
4.01  
3.88  
3.86  
3.84  
3.32  
3.29  
3.27  
3.04  
3.03  
3.01  
3.00  
2.88  
2.87  
2.17  
2.15  
2.12  
2.11  
1.92  
1.87  
1.67  
1.28  
1.25  
0.67  
0.65  
0.37  
0.35

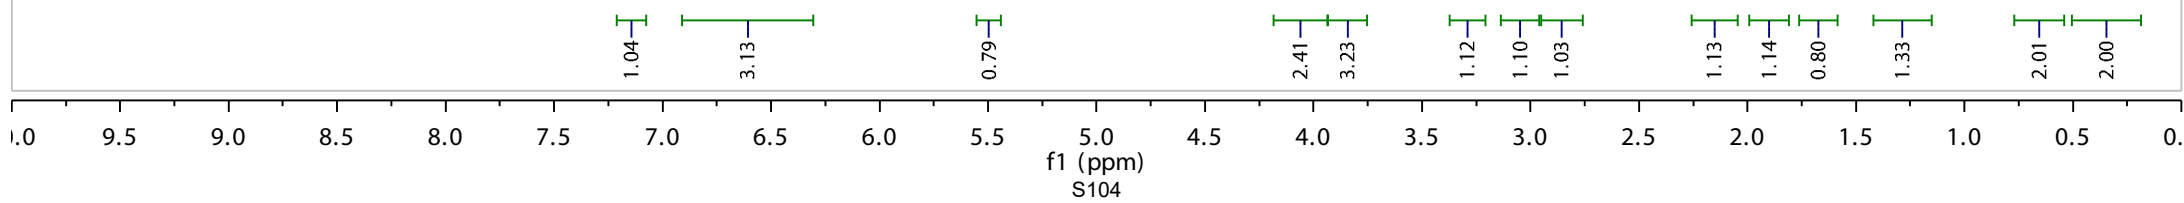



<sup>13</sup>C NMR (75 MHz, CDCl<sub>3</sub>)

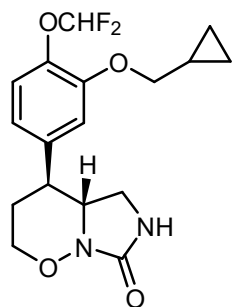

2a

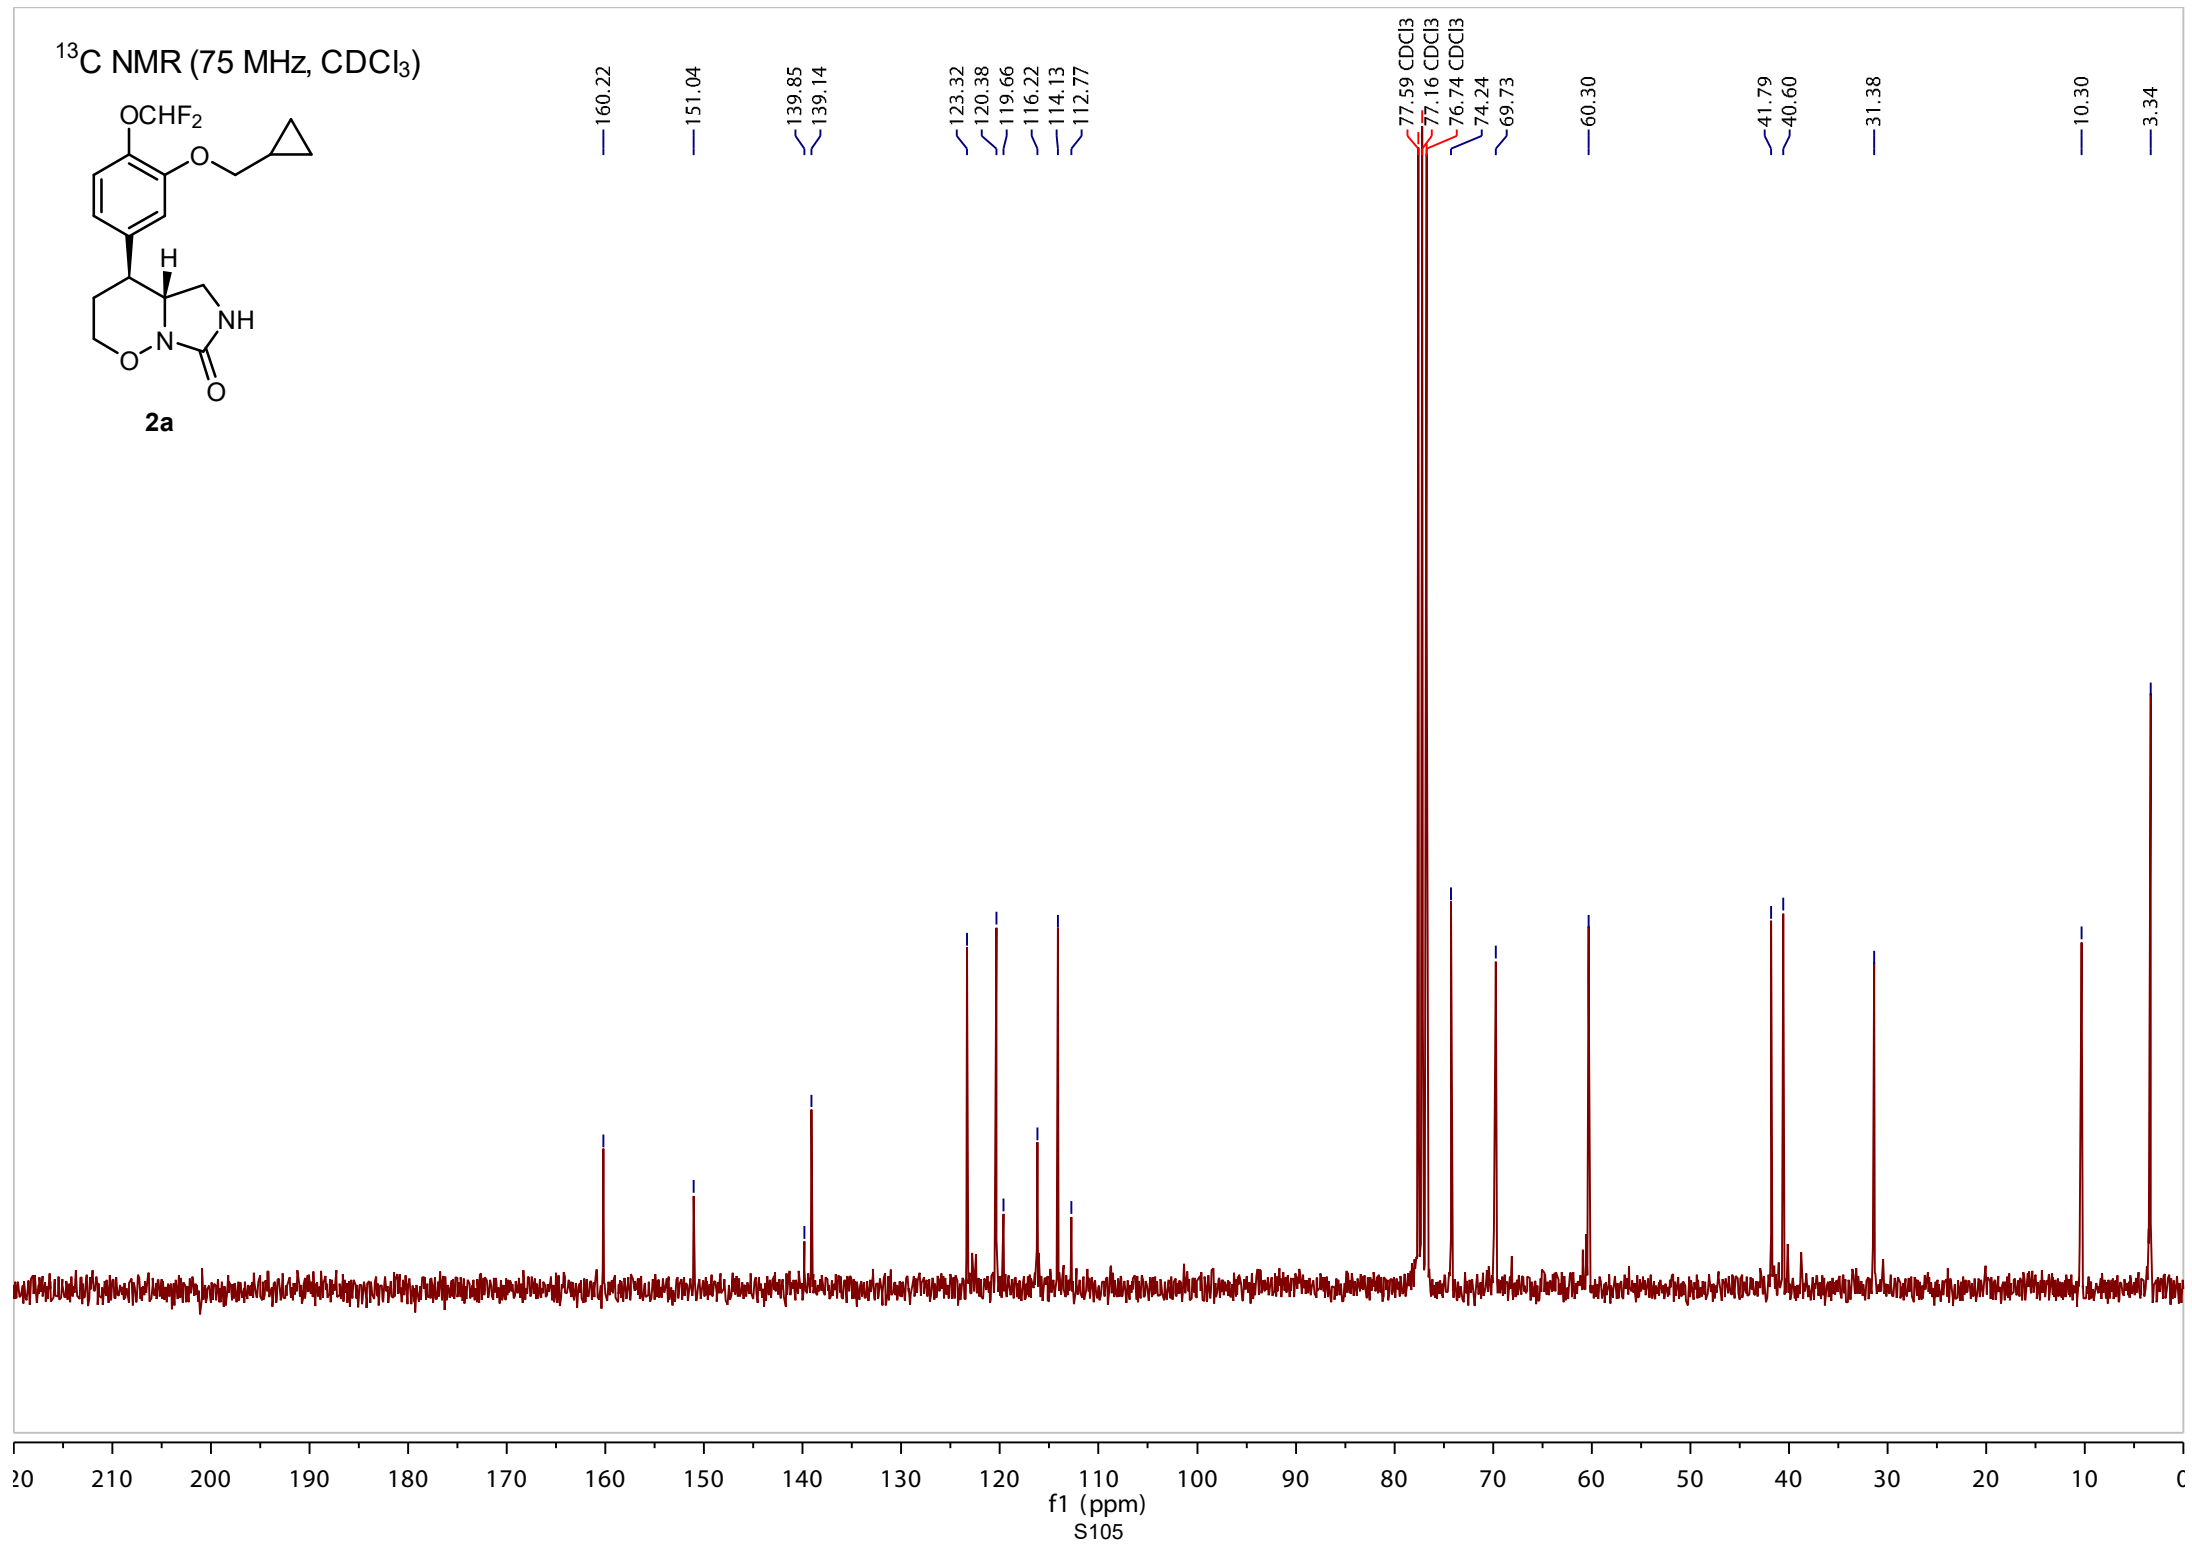

$^{19}\text{F}$  NMR (282 MHz,  $\text{CDCl}_3$ )

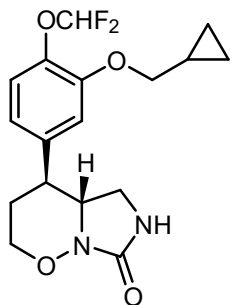

**2a**

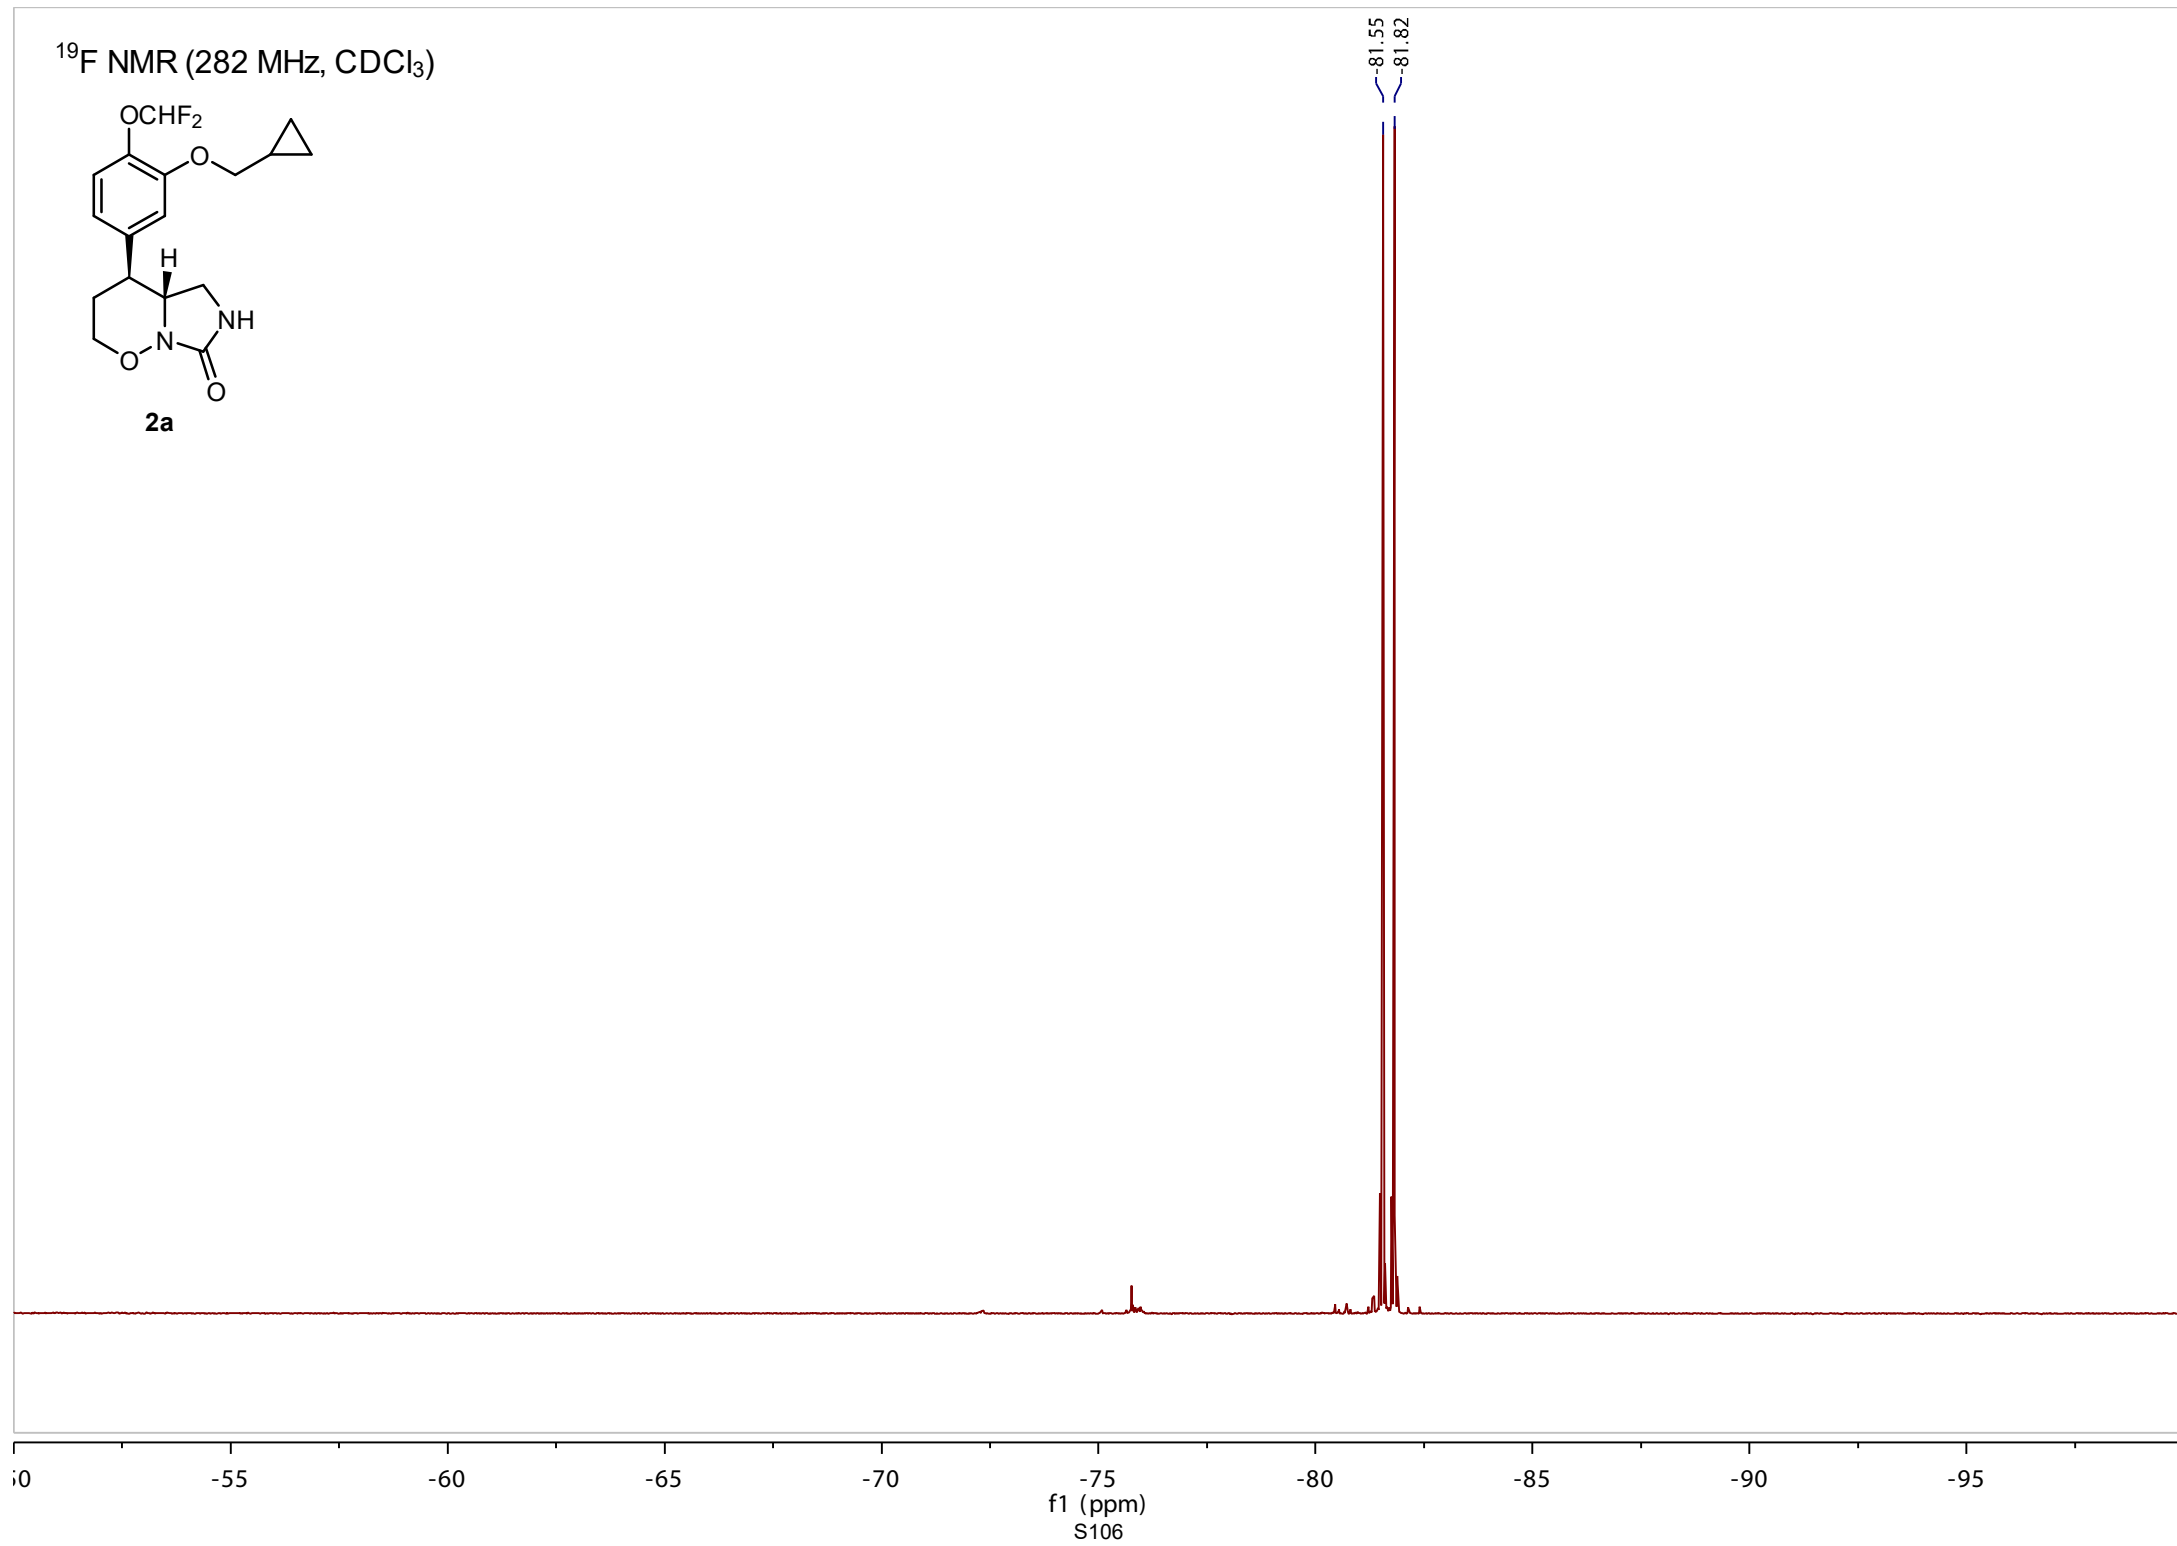

COSY NMR

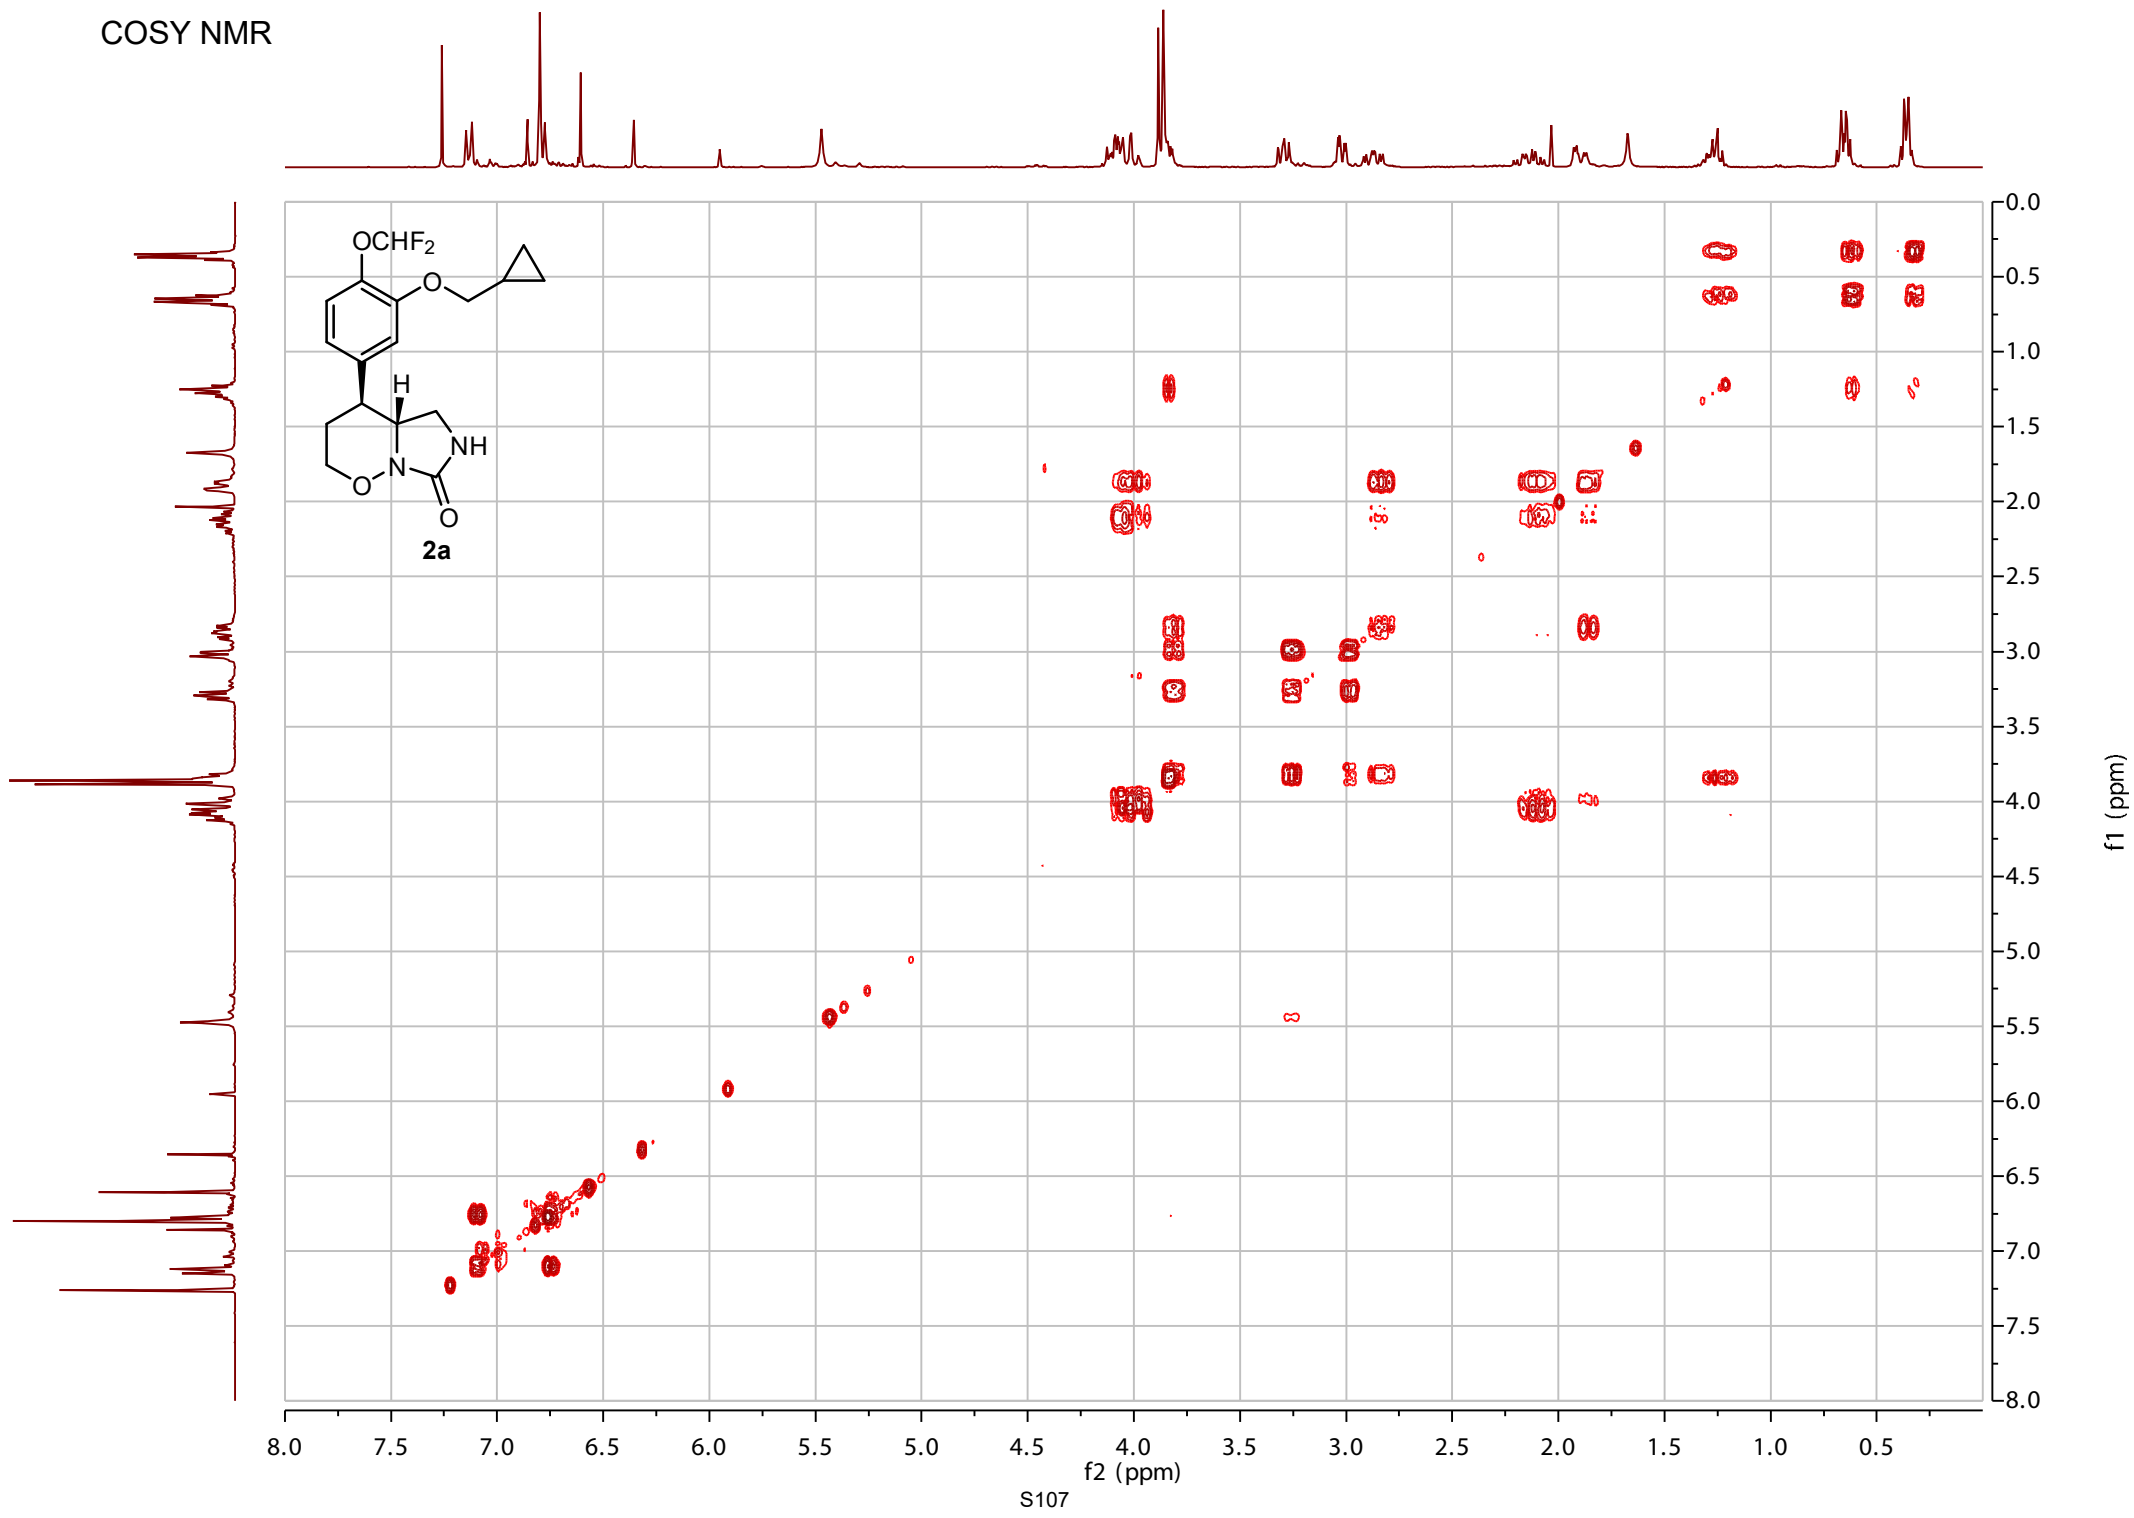

# HSQC NMR

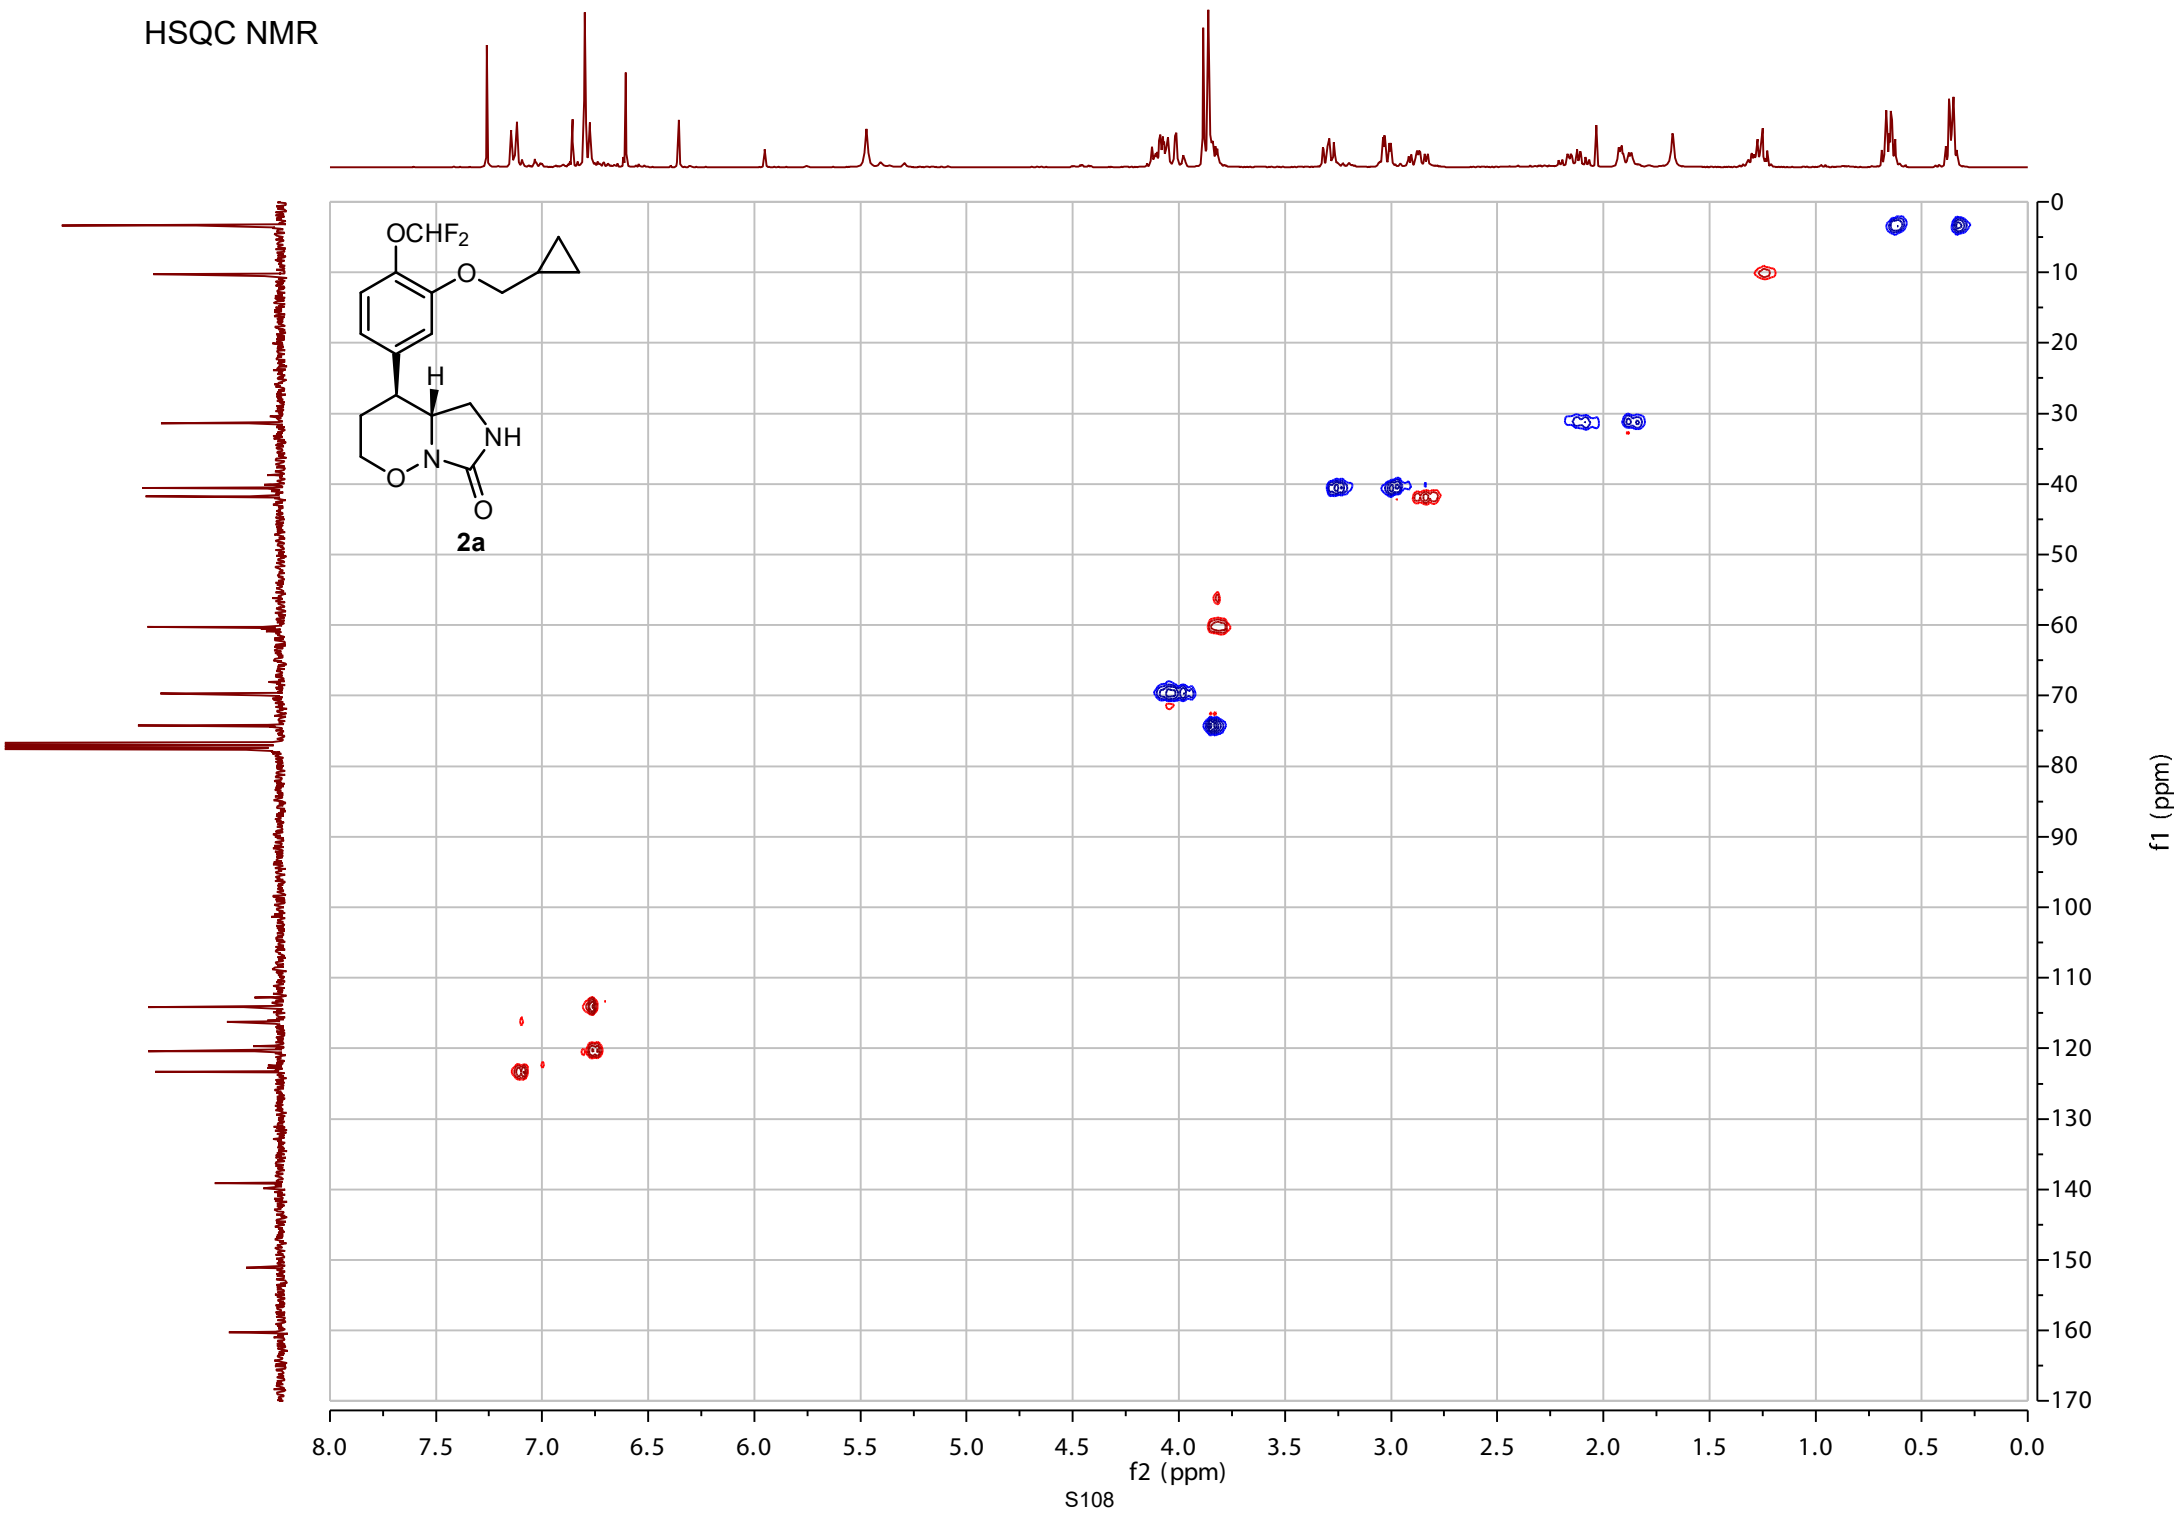

NOESY NMR

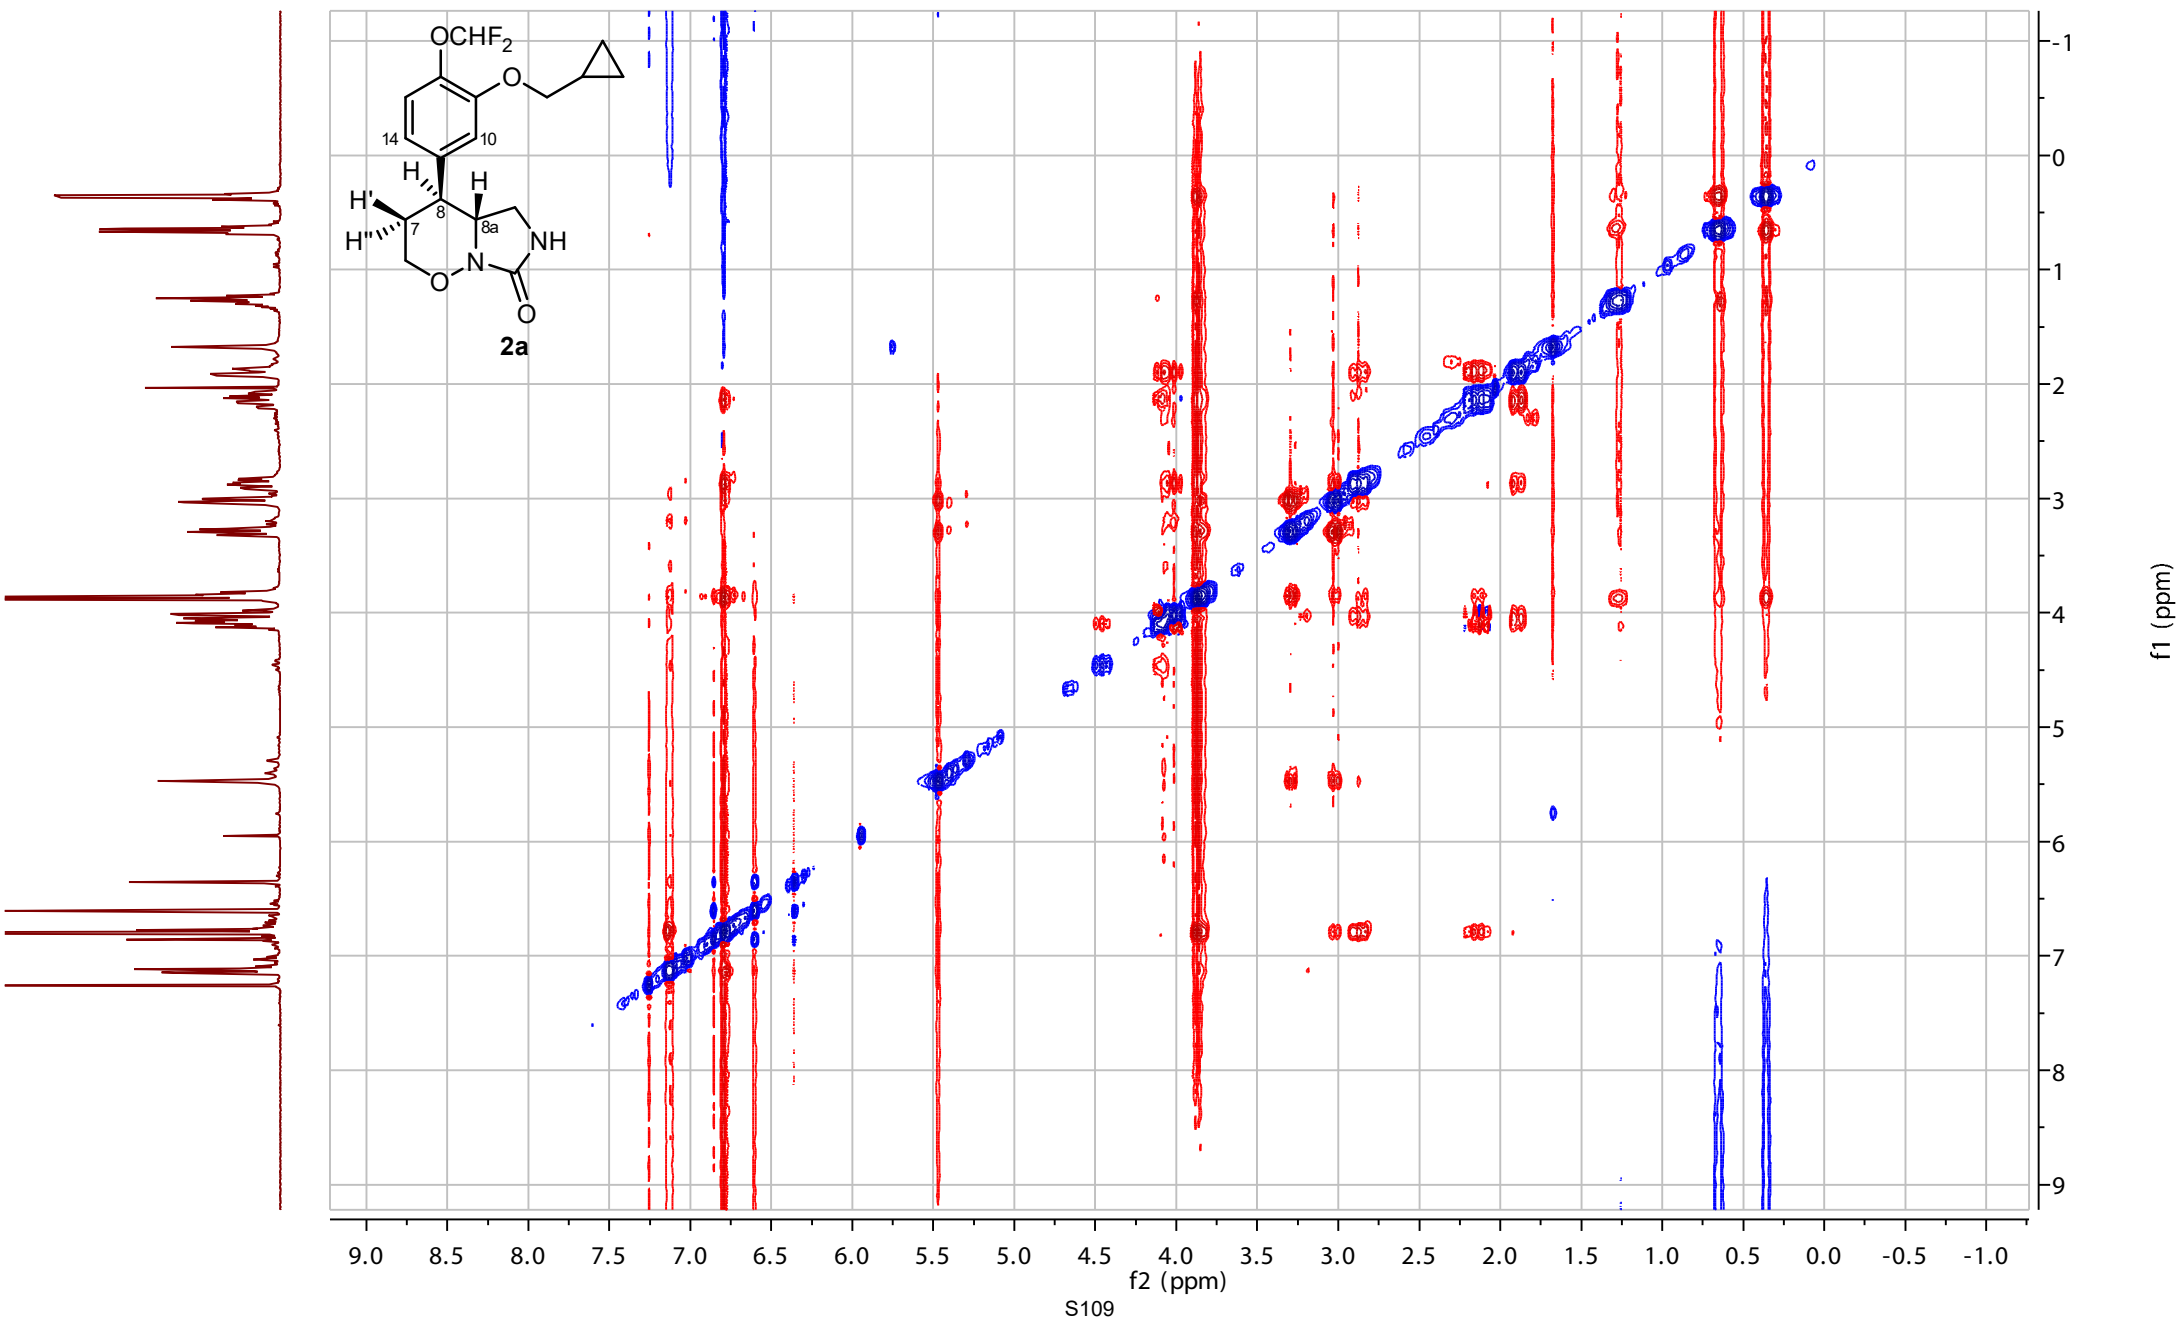

<sup>1</sup>H NMR (400 MHz, CDCl<sub>3</sub>)

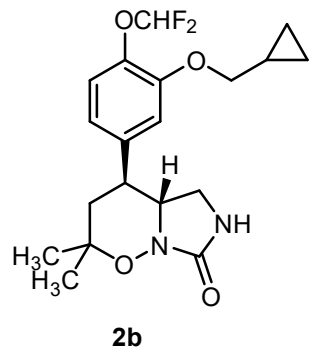

7.26  
7.14  
7.12  
6.80  
6.79  
6.78  
6.77  
6.61  
6.42  
4.62  
3.89  
3.87  
3.70  
3.69  
3.66  
3.64  
3.32  
3.30  
3.28  
3.08  
3.06  
3.05  
3.04  
1.85  
1.84  
1.82  
1.48  
1.38  
1.28  
1.28  
1.26  
0.67  
0.65  
0.37  
0.36

1.0 9.5 9.0 8.5 8.0 7.5 7.0 6.5 6.0 5.5 5.0 4.5 4.0 3.5 3.0 2.5 2.0 1.5 1.0 0.5

f1 (ppm)

S110

1.03

2.93

1.02

2.03

1.04

1.00

2.04

1.99

3.12

3.15

3.03

2.12

2.08

<sup>13</sup>C NMR (101 MHz, CDCl<sub>3</sub>)

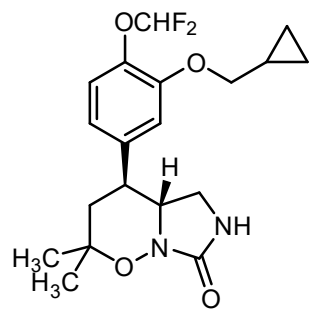

— 160.13

— 151.09

— 139.88  
— 138.90

— 123.34

— 120.18

— 118.83

— 116.25

— 113.93

— 113.66

— 79.81

— 77.48 CDCl<sub>3</sub>

— 77.16 CDCl<sub>3</sub>

— 76.84 CDCl<sub>3</sub>

— 74.30

— 60.32

— 42.98

— 41.25

— 40.96

— 28.51

— 23.00

— 10.34

— 3.36

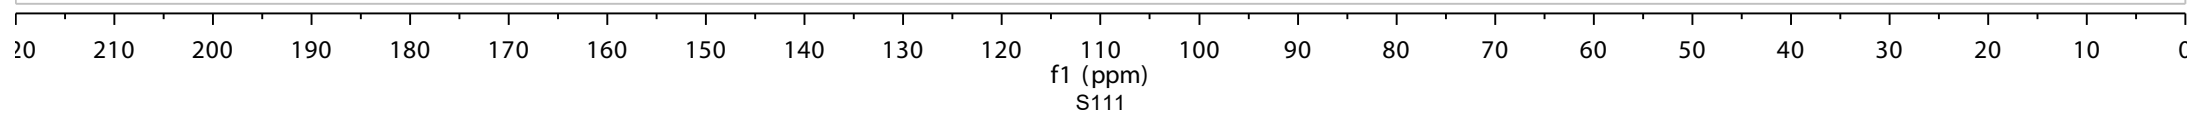

$^{19}\text{F}$  NMR (282 MHz,  $\text{CDCl}_3$ )

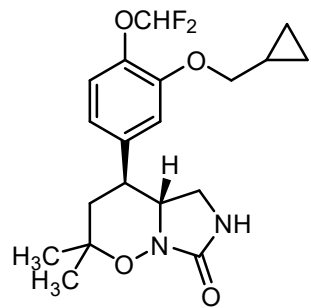

**2b**

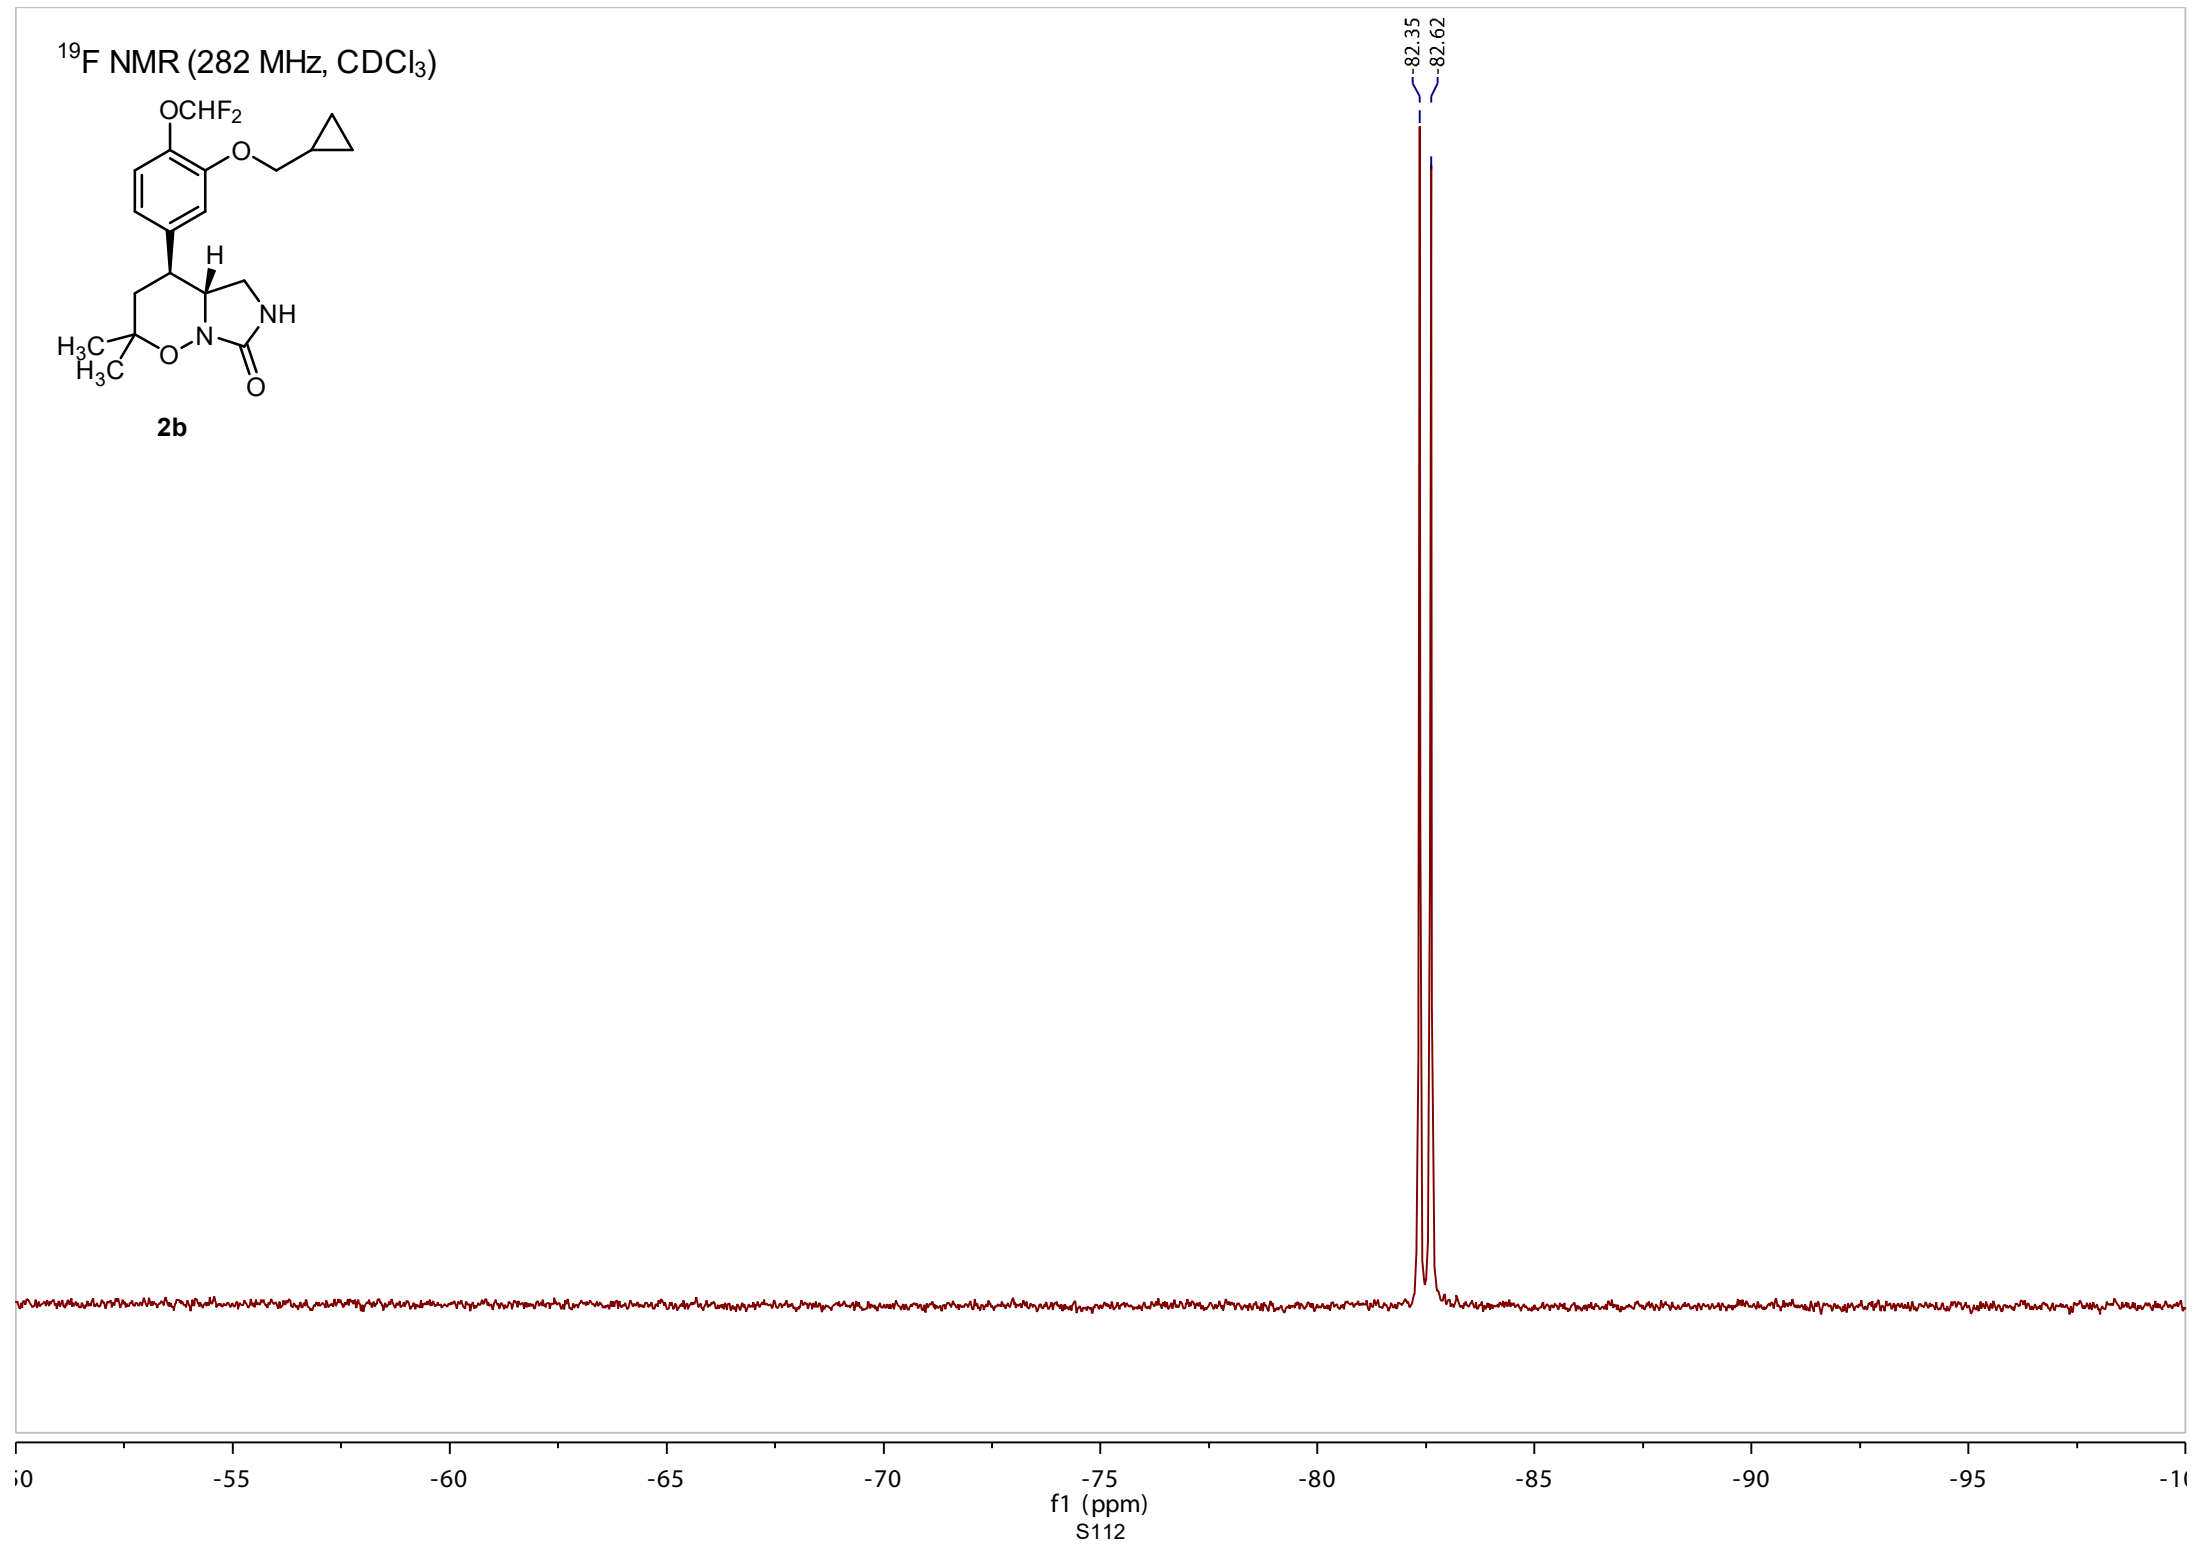



<sup>1</sup>H NMR (300 MHz, CDCl<sub>3</sub>)

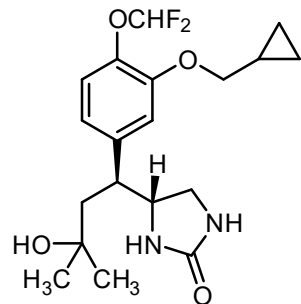

**24b**

7.26  
7.09  
7.07  
6.84  
6.75  
6.73  
6.70  
6.59  
6.34

4.86

3.90  
3.86  
3.84

3.13  
3.10  
3.07  
3.02  
3.00  
2.97  
2.91  
2.88

1.97  
1.95  
1.91  
1.88

1.25  
1.19  
1.10

0.65  
0.63  
0.36  
0.34

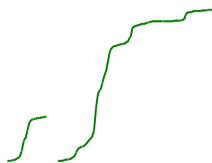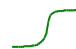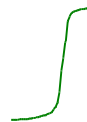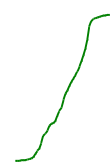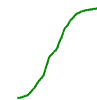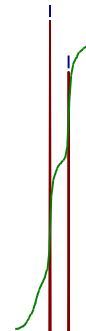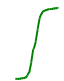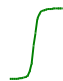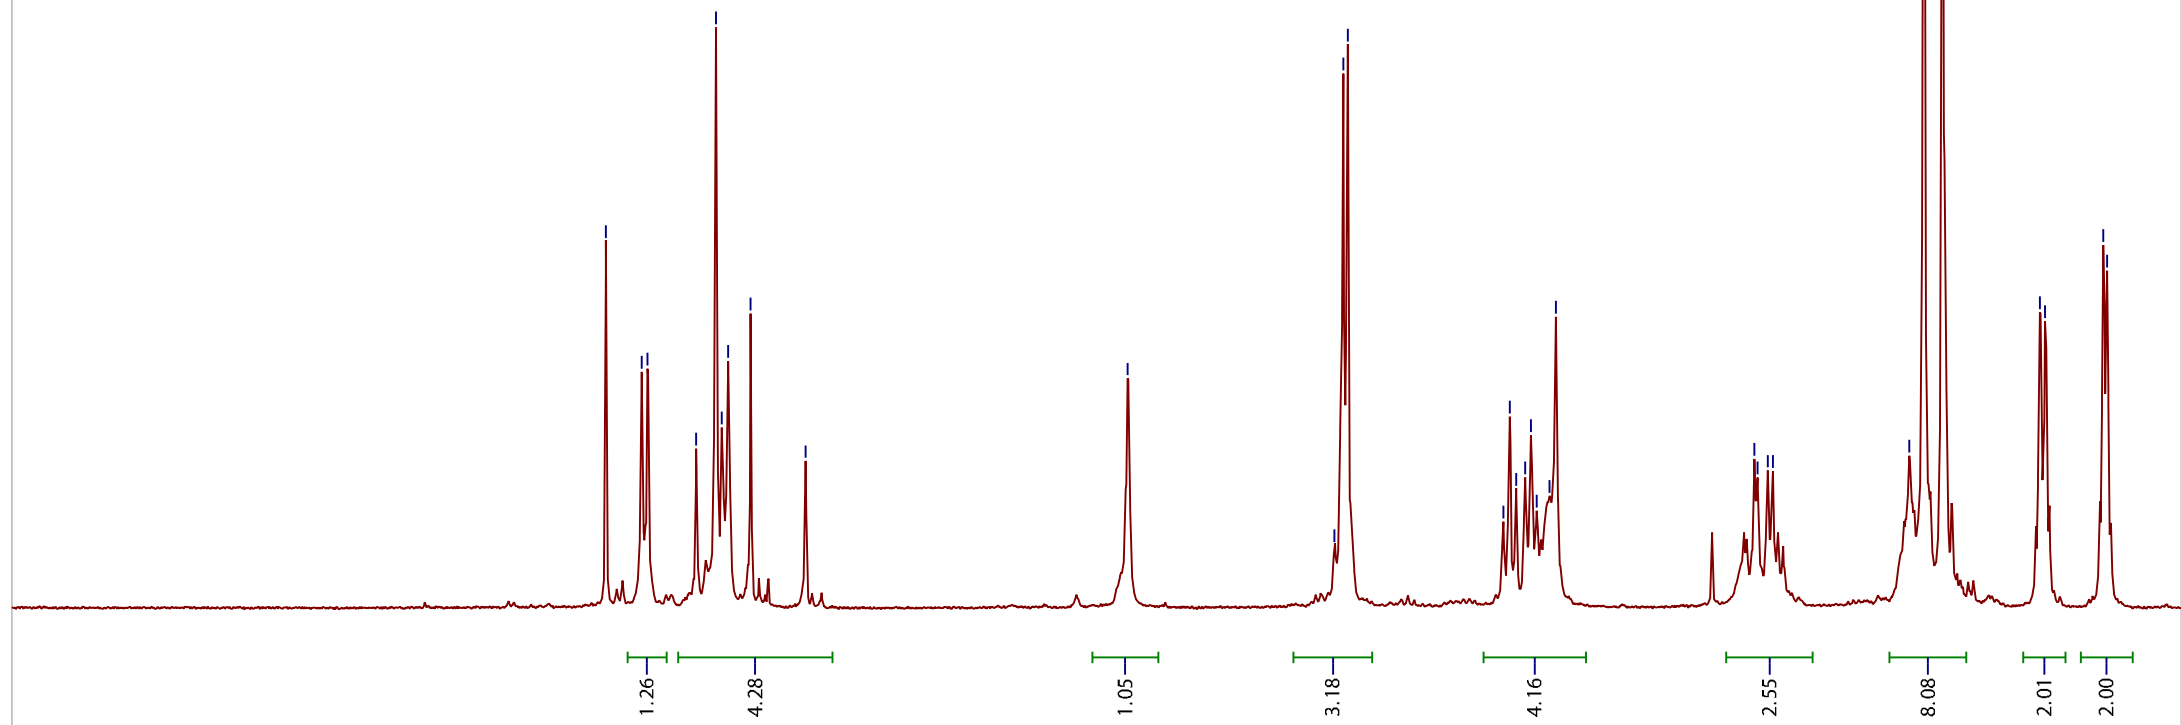

f1 (ppm)  
S113

$^{13}\text{C}$  NMR (75 MHz,  $\text{CDCl}_3$ )

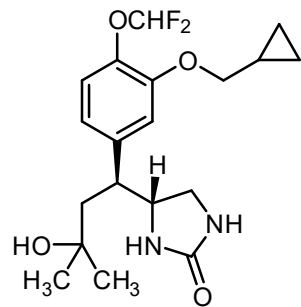

**24b**

- 164.38
- 150.78
- 141.81
- 139.41
- 139.37
- 139.34
- 123.05
- 120.65
- 119.76
- 116.32
- 114.54
- 112.88
- 77.58
- 77.36
- 77.16
- 76.74
- 74.17
- 70.64
- 58.87
- 47.81
- 47.02
- 45.61
- 31.90
- 28.36
- 10.29
- 3.30

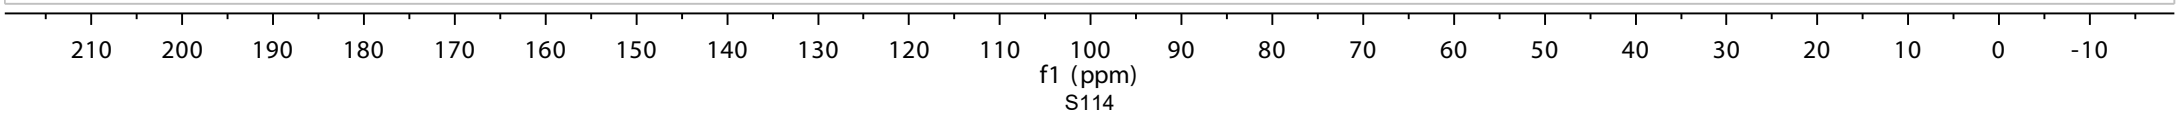

<sup>19</sup>F NMR (282 MHz, CDCl<sub>3</sub>)

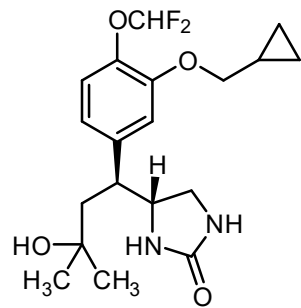

**24b**

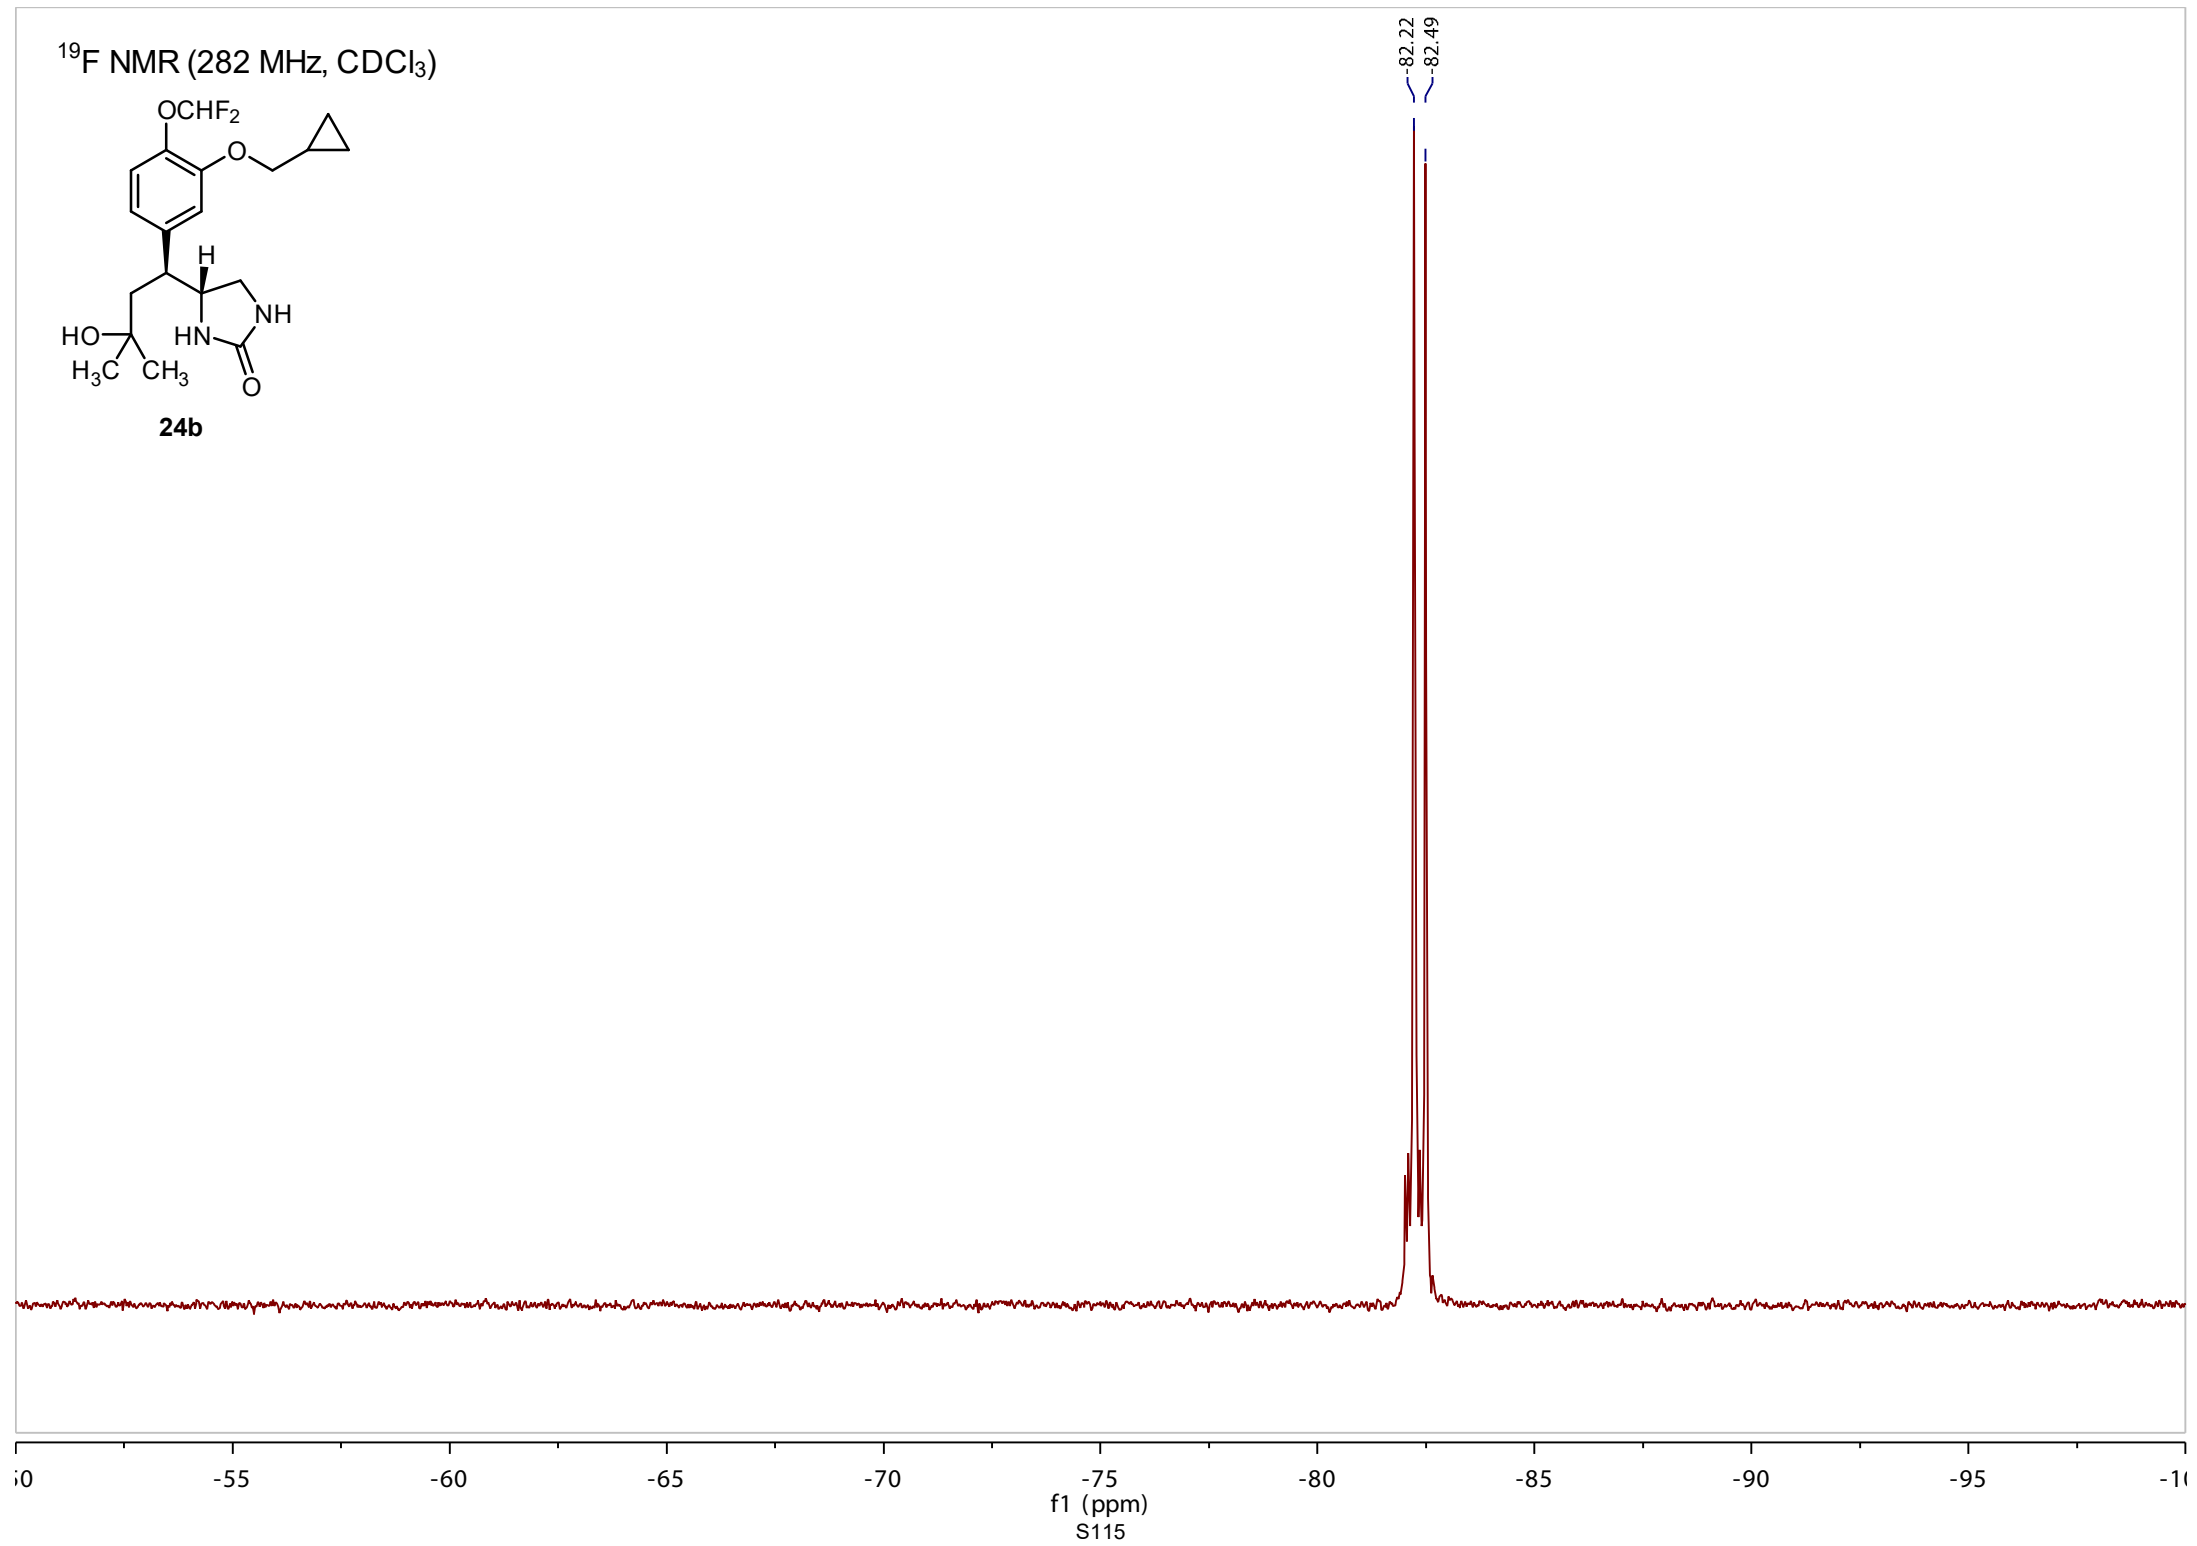

<sup>1</sup>H NMR (300 MHz, CDCl<sub>3</sub>)

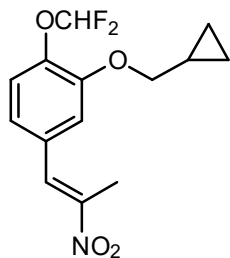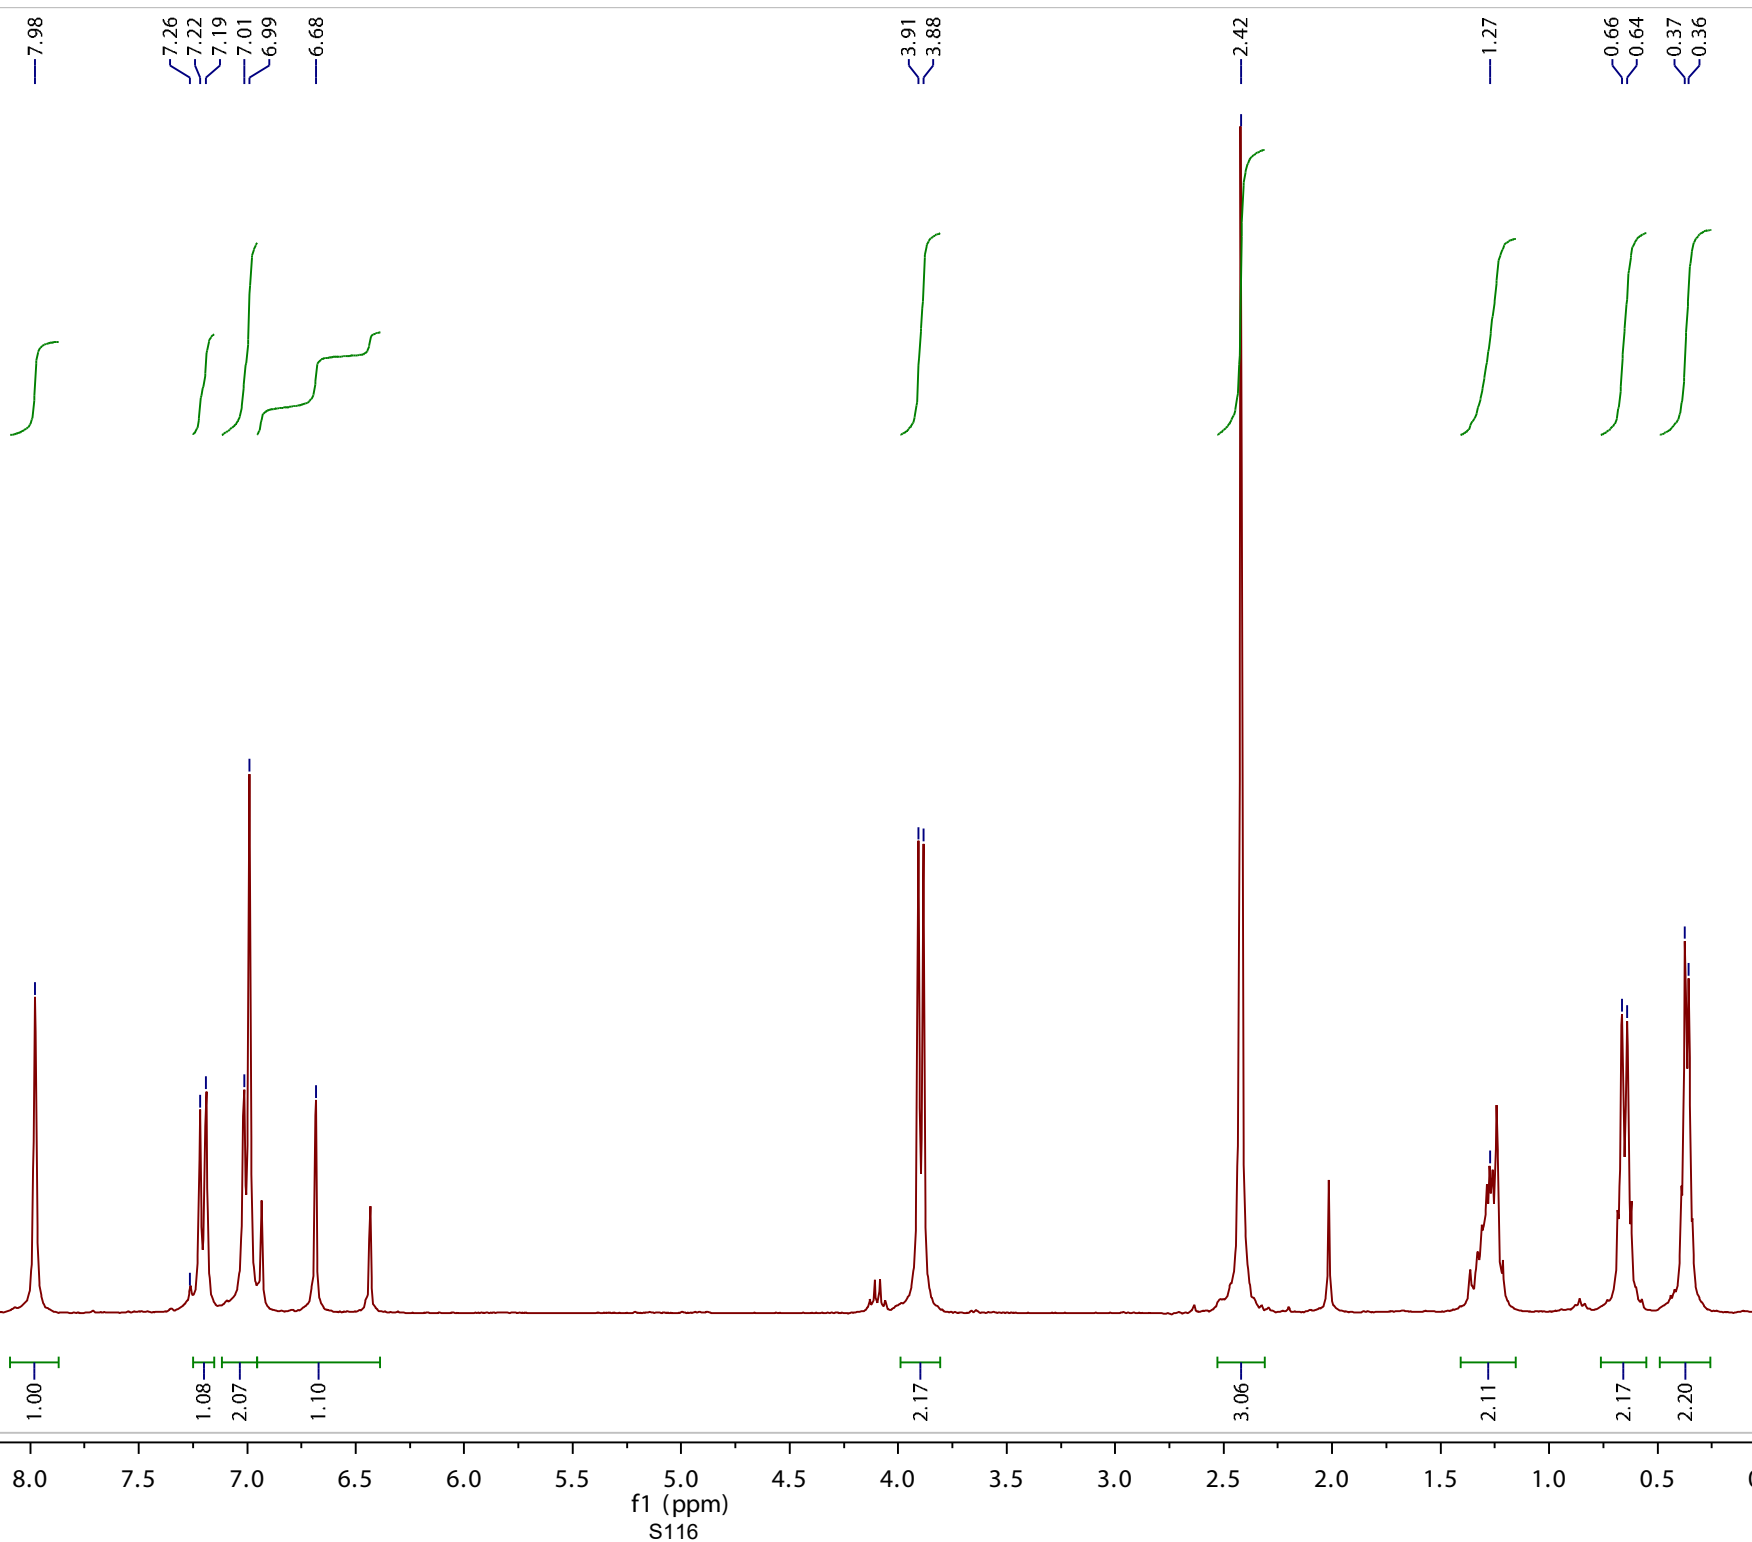

$^{13}\text{C}$  NMR (75 MHz,  $\text{CDCl}_3$ )

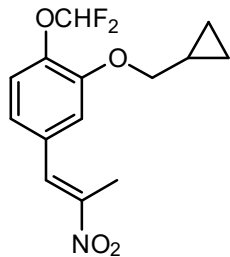

**4a**

150.66  
141.54  
132.60  
130.85  
122.90  
122.67  
119.43  
116.07  
115.99  
112.52  
77.16  
74.17

14.00  
10.11  
3.25

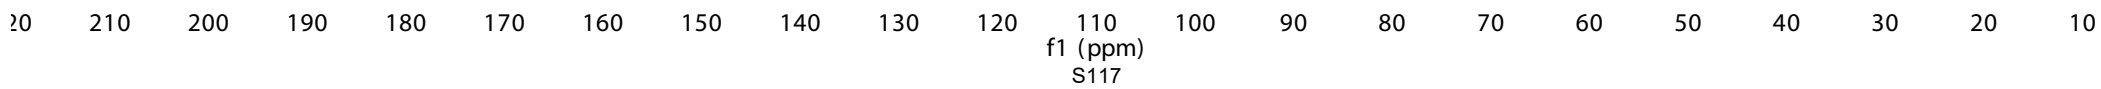

$^{19}\text{F}$  NMR (282 MHz,  $\text{CDCl}_3$ )

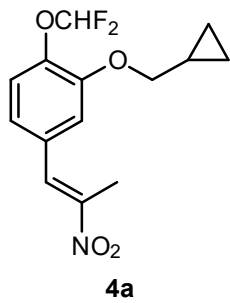

-82.46  
-82.73

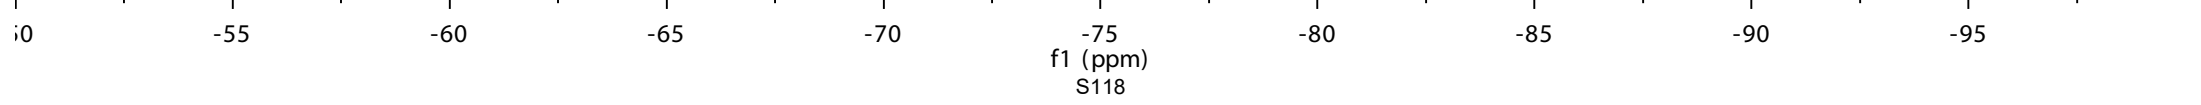

<sup>1</sup>H NMR (300 MHz, CDCl<sub>3</sub>)

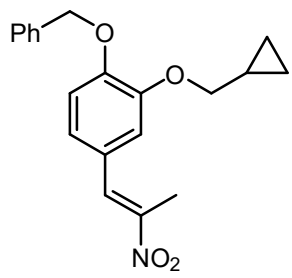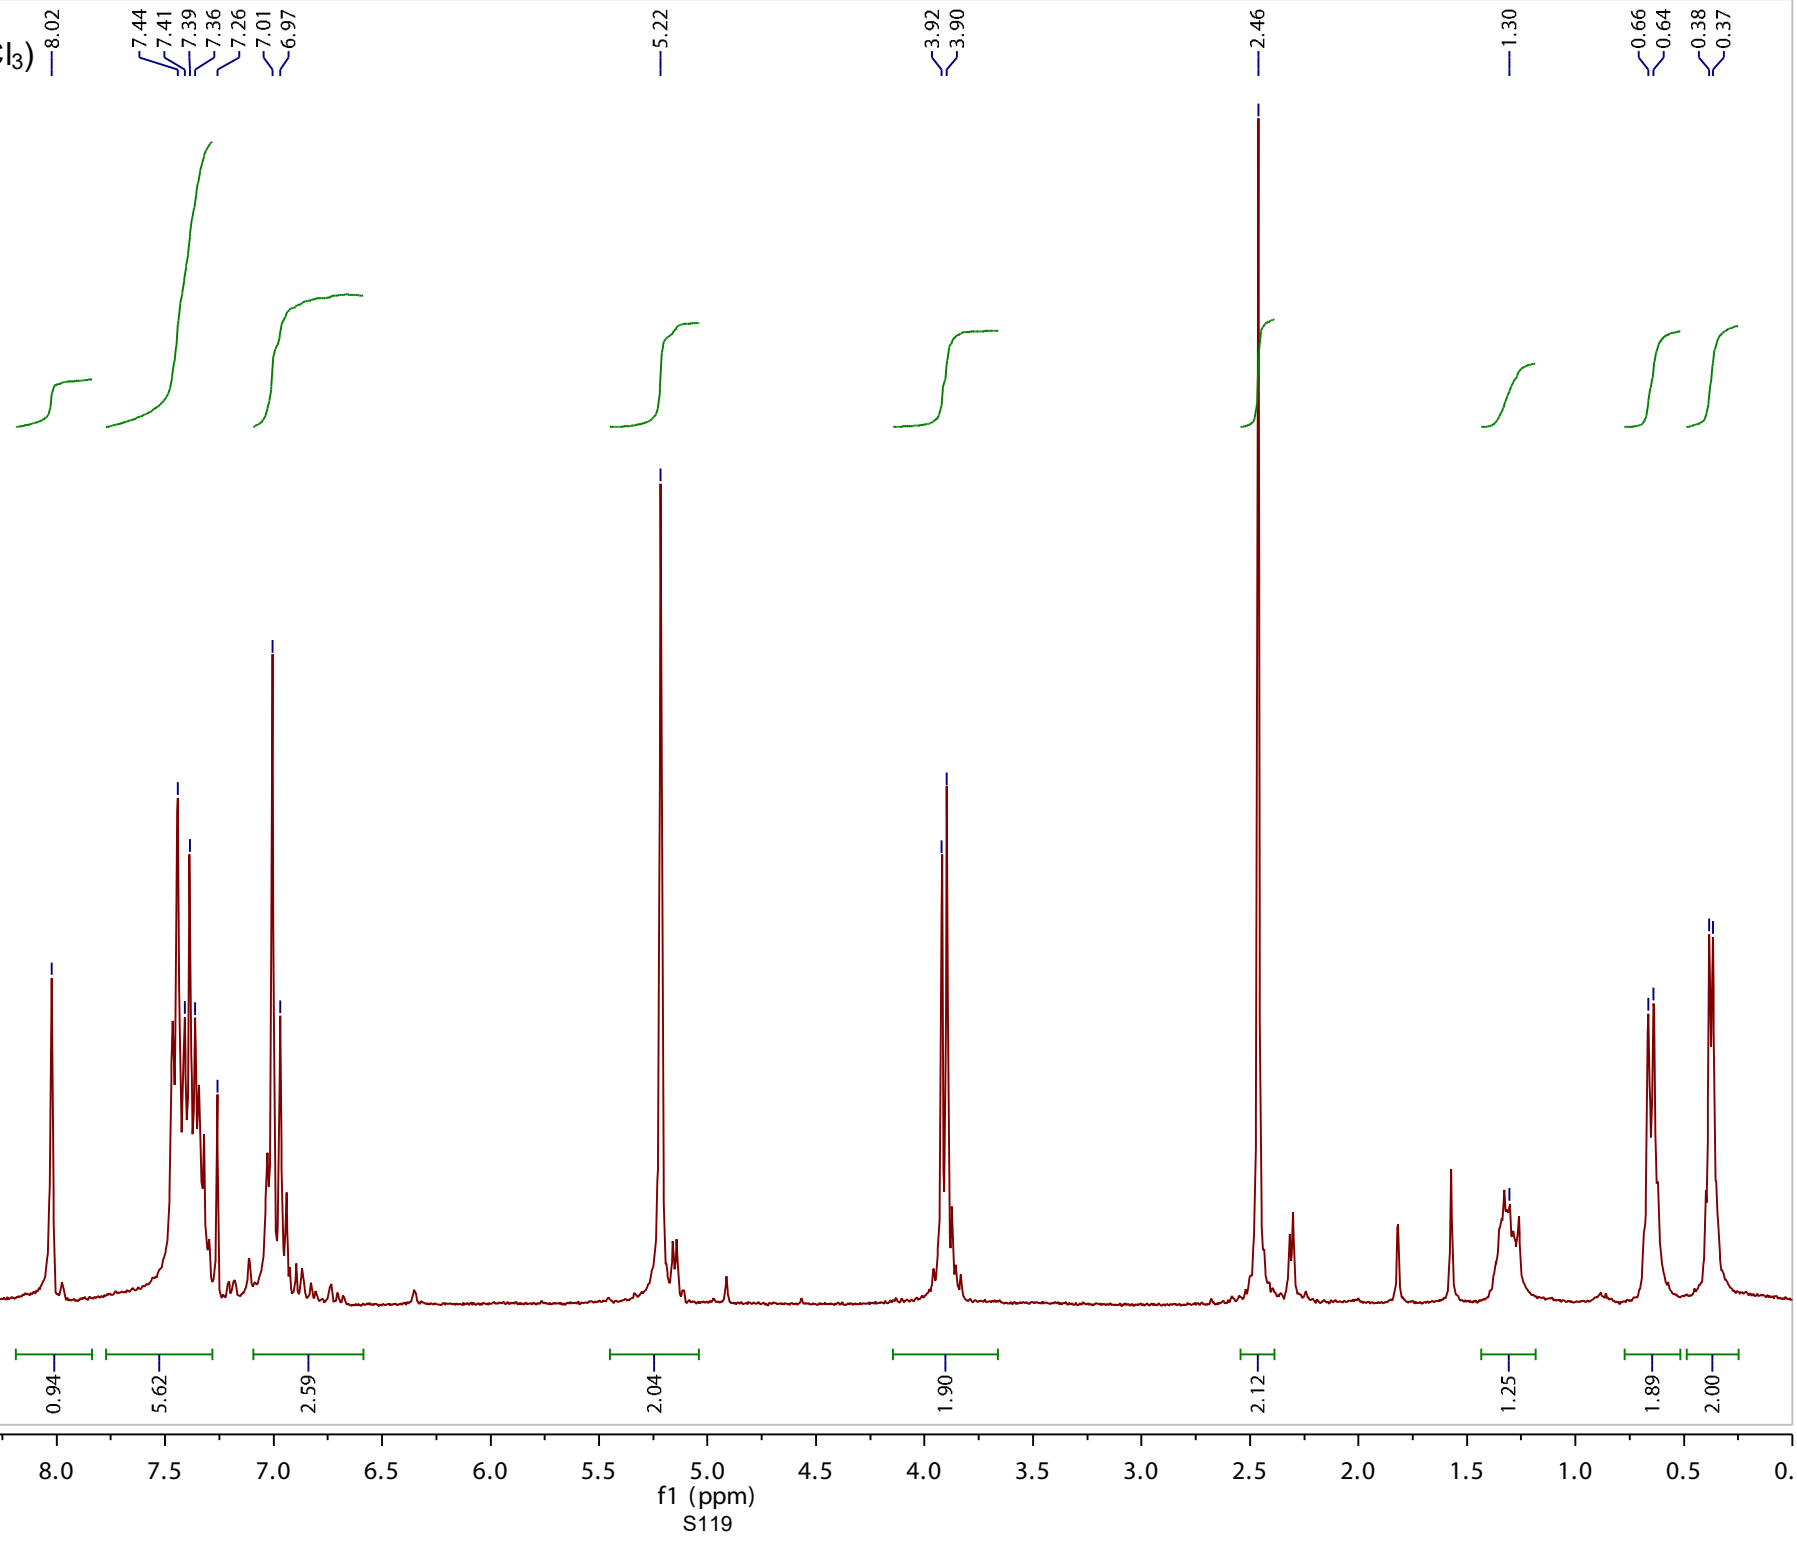

$^{13}\text{C}$  NMR (75 MHz,  $\text{CDCl}_3$ )

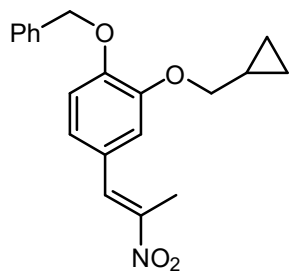

**4b**

150.80  
149.34  
146.09

136.81  
133.87  
128.72  
128.12  
127.24  
125.63  
124.41

116.83  
114.62

77.16  $\text{CDCl}_3$   
74.59  
71.15

14.30

10.48

3.47

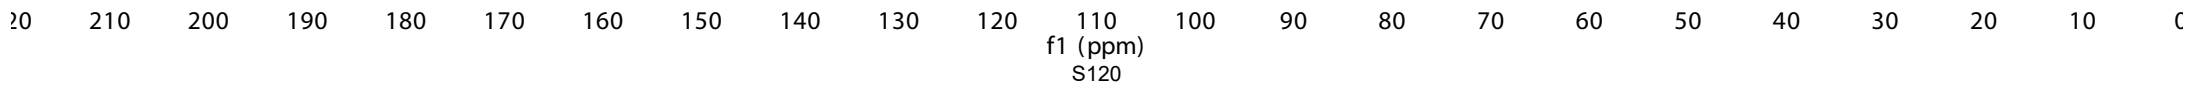



<sup>1</sup>H NMR (300 MHz, CDCl<sub>3</sub>)

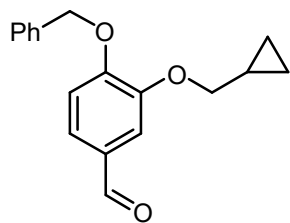

6b

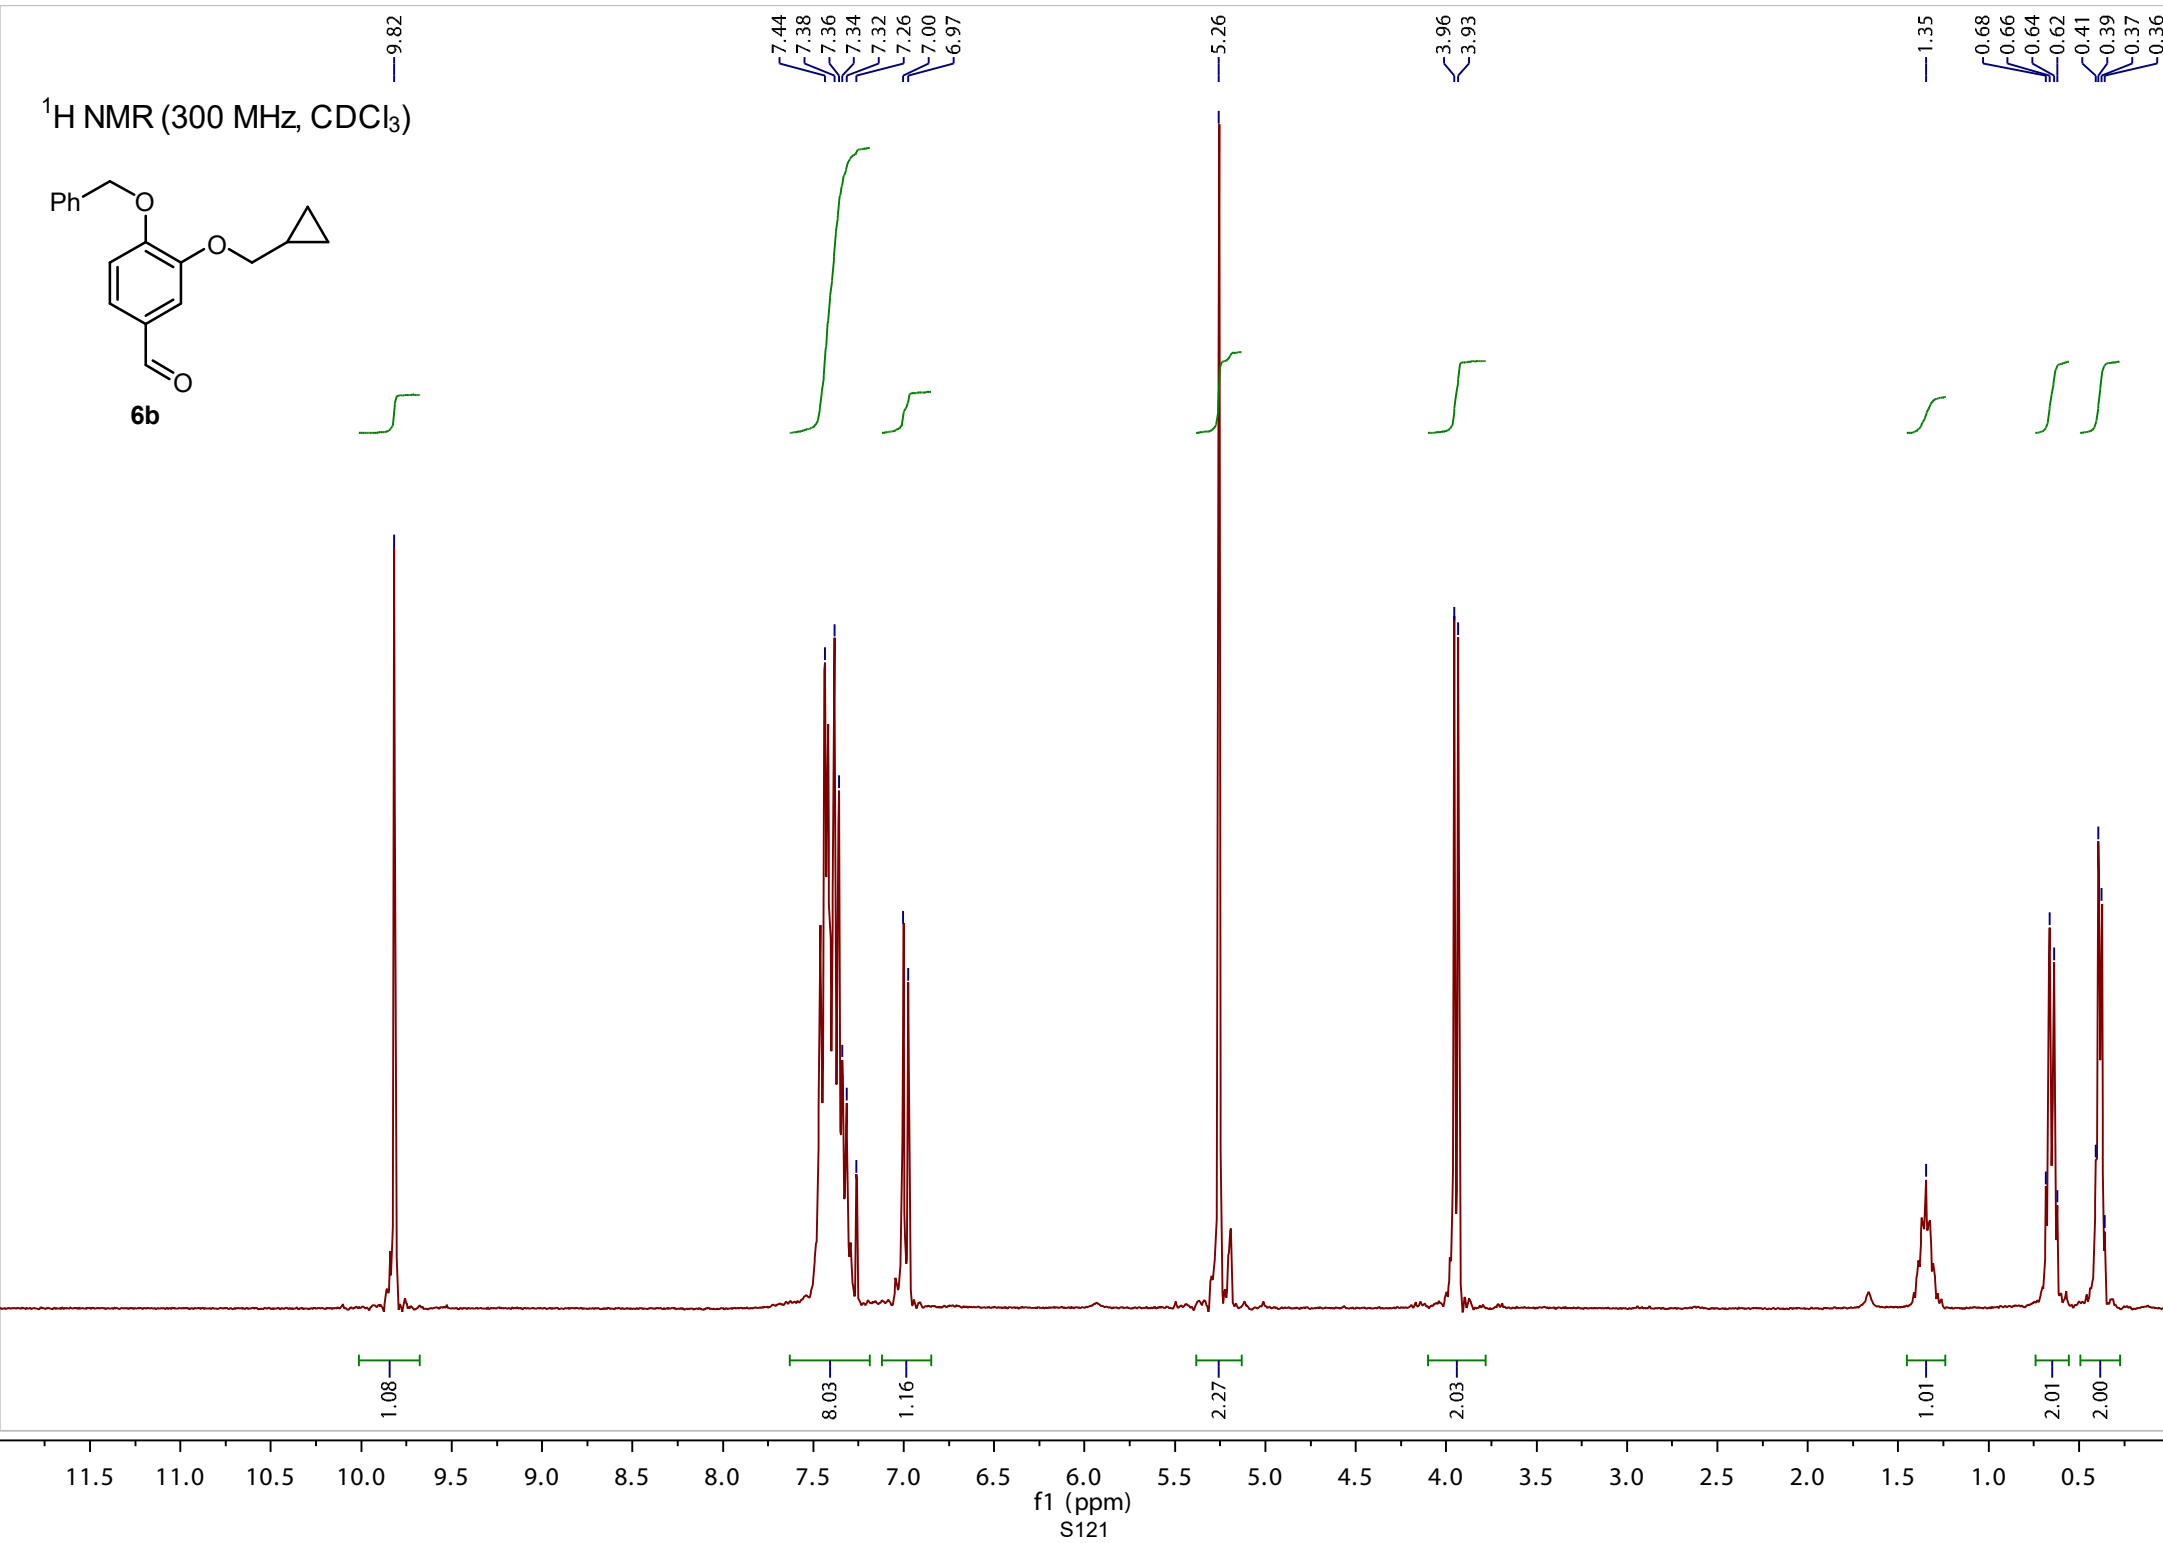

<sup>13</sup>C NMR (75 MHz, CDCl<sub>3</sub>)

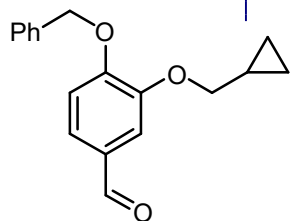

**6b**

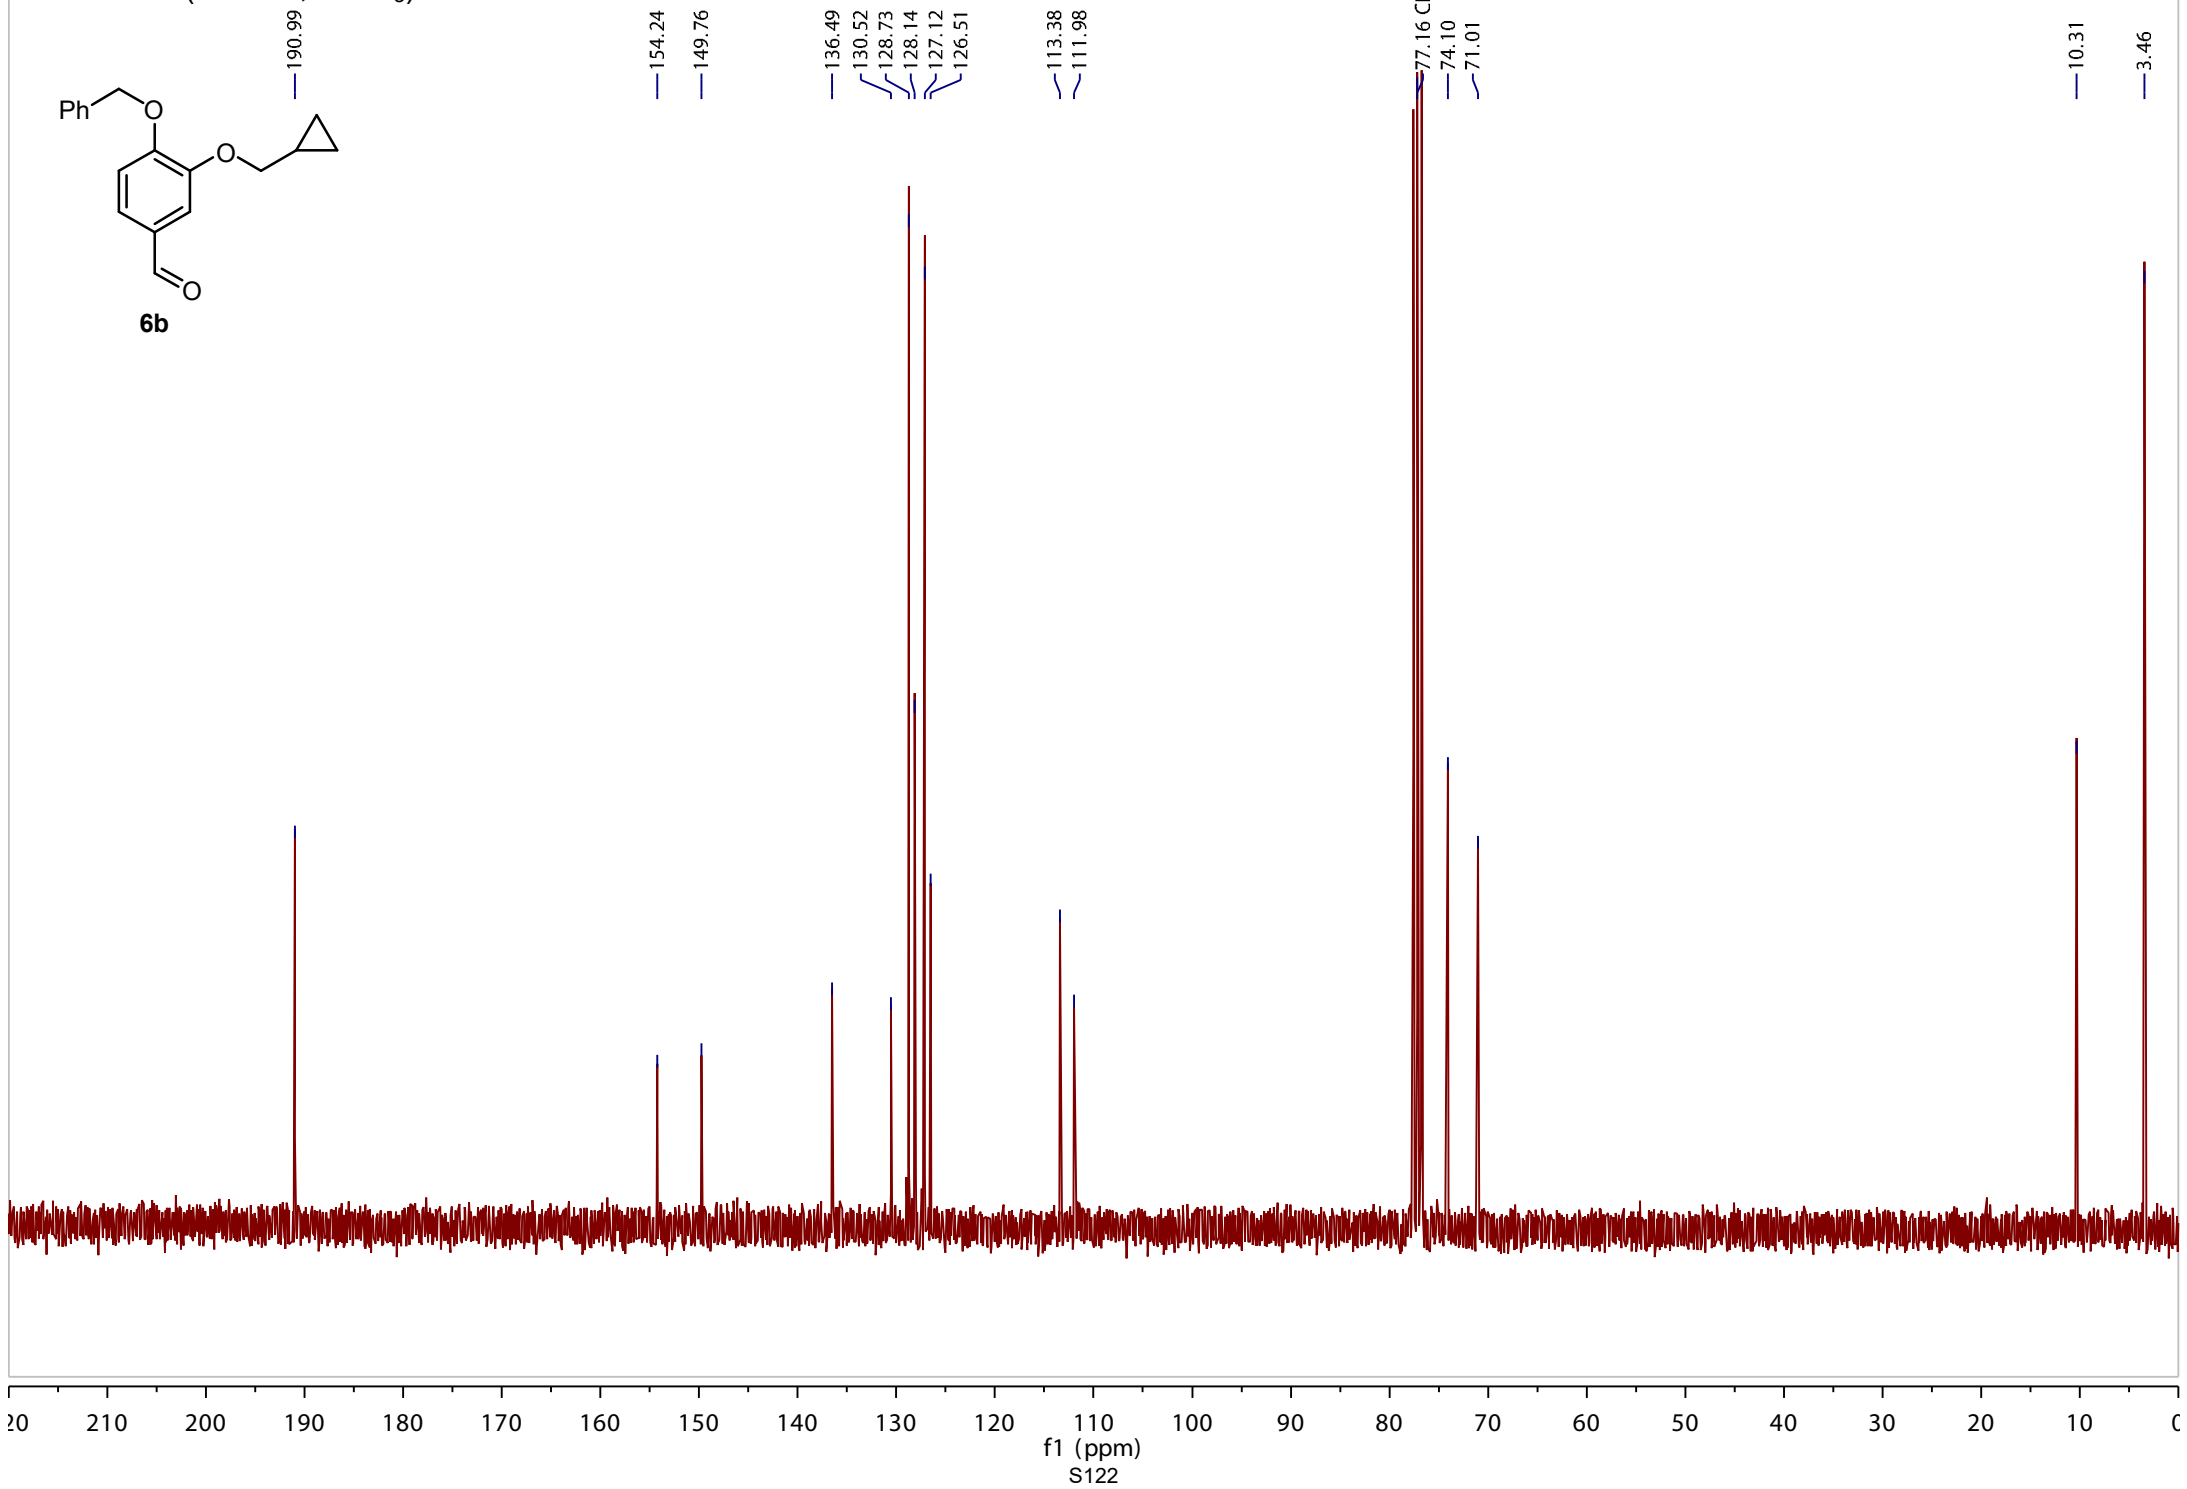

<sup>1</sup>H NMR (300 MHz, CDCl<sub>3</sub>)

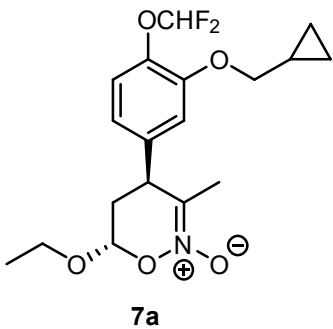

7.26  
7.13  
7.11  
6.86  
6.76  
6.73  
6.71  
6.61  
6.36

5.36

4.04  
3.84  
3.82  
3.72

2.24  
2.07  
1.86

1.29  
1.26  
1.24

0.65  
0.63  
0.35  
0.34

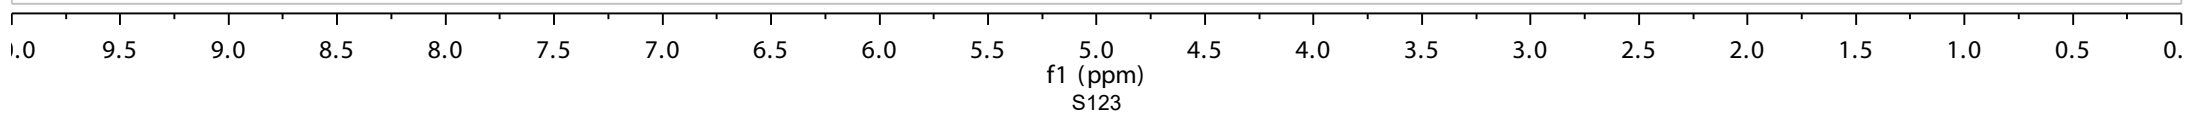

<sup>13</sup>C NMR (50 MHz, CDCl<sub>3</sub>)

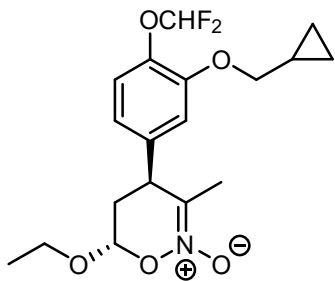

**7a**

151.31

139.83  
138.89

123.40  
122.84  
121.34  
120.81  
116.16  
113.56  
110.99

101.02

77.16  
74.17

65.18

40.59

34.49

17.67  
15.13

10.18

3.31

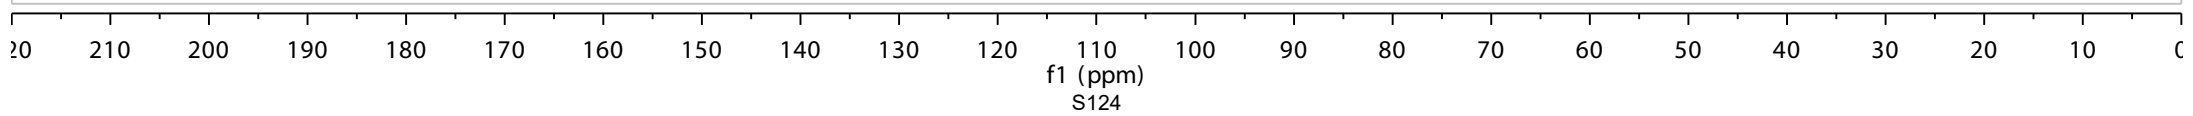

$^{19}\text{F}$  NMR (282 MHz,  $\text{CDCl}_3$ )

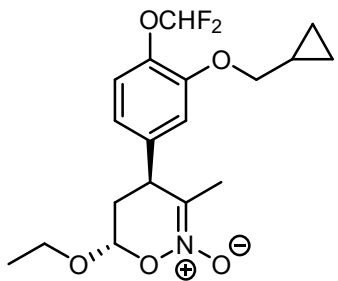

**7a**

81.60  
81.86

-55 -60 -65 -70 -75 -80 -85 -90 -95 -100

f1 (ppm)  
S125

COSY NMR

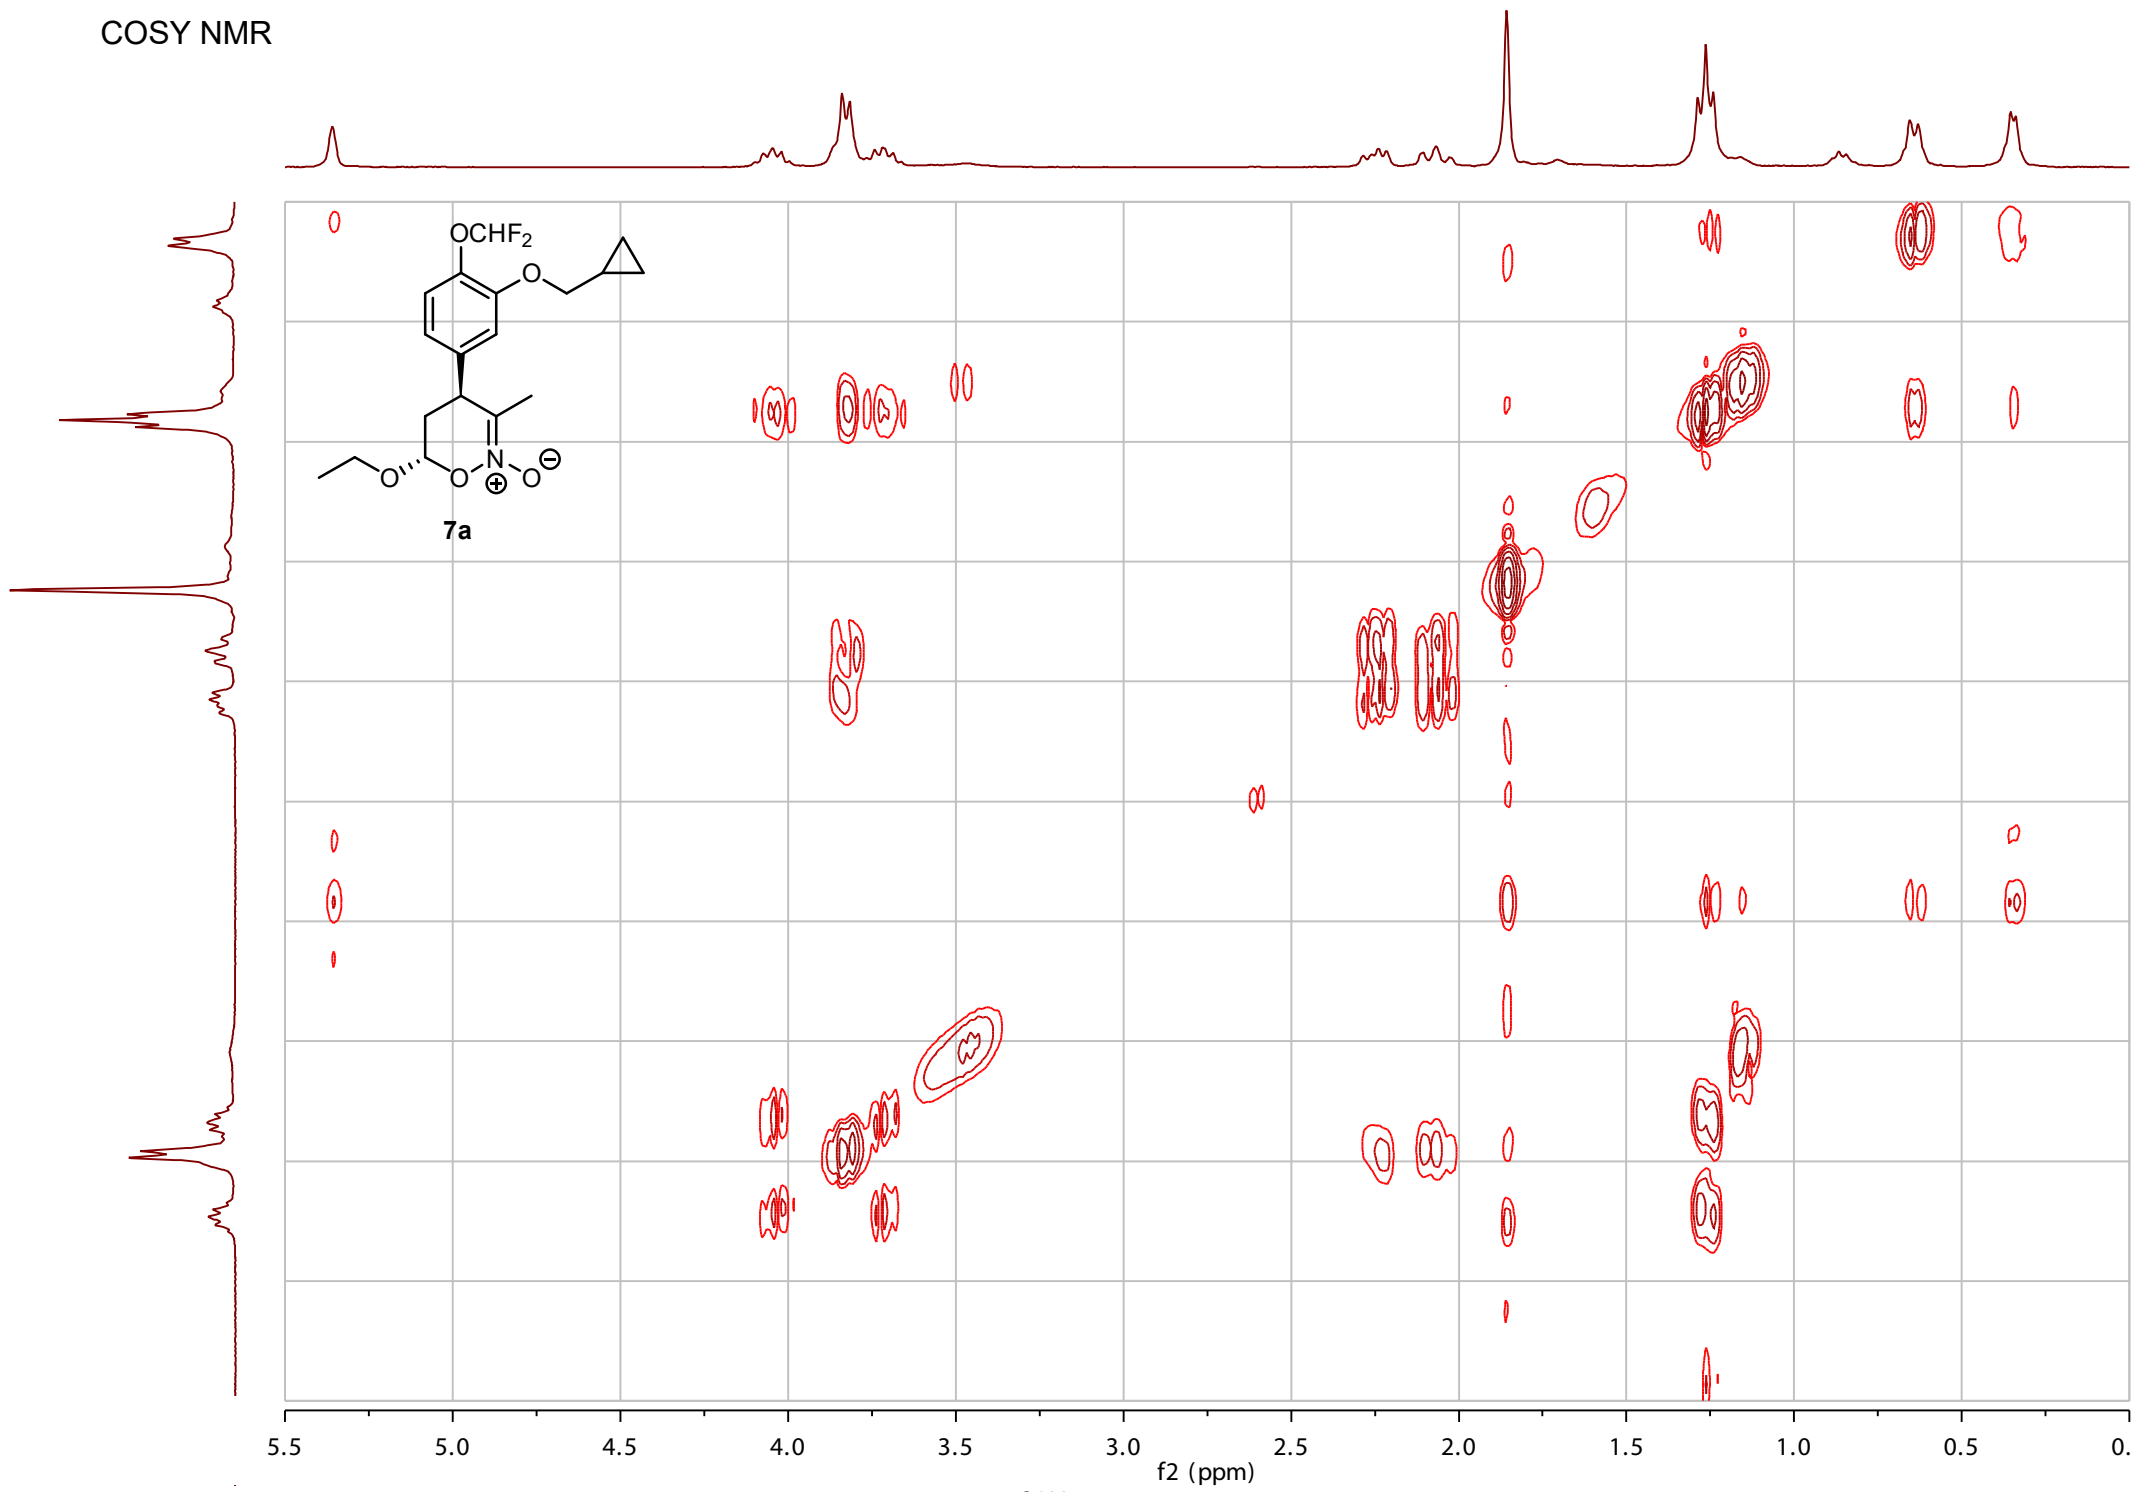

# HSQC NMR

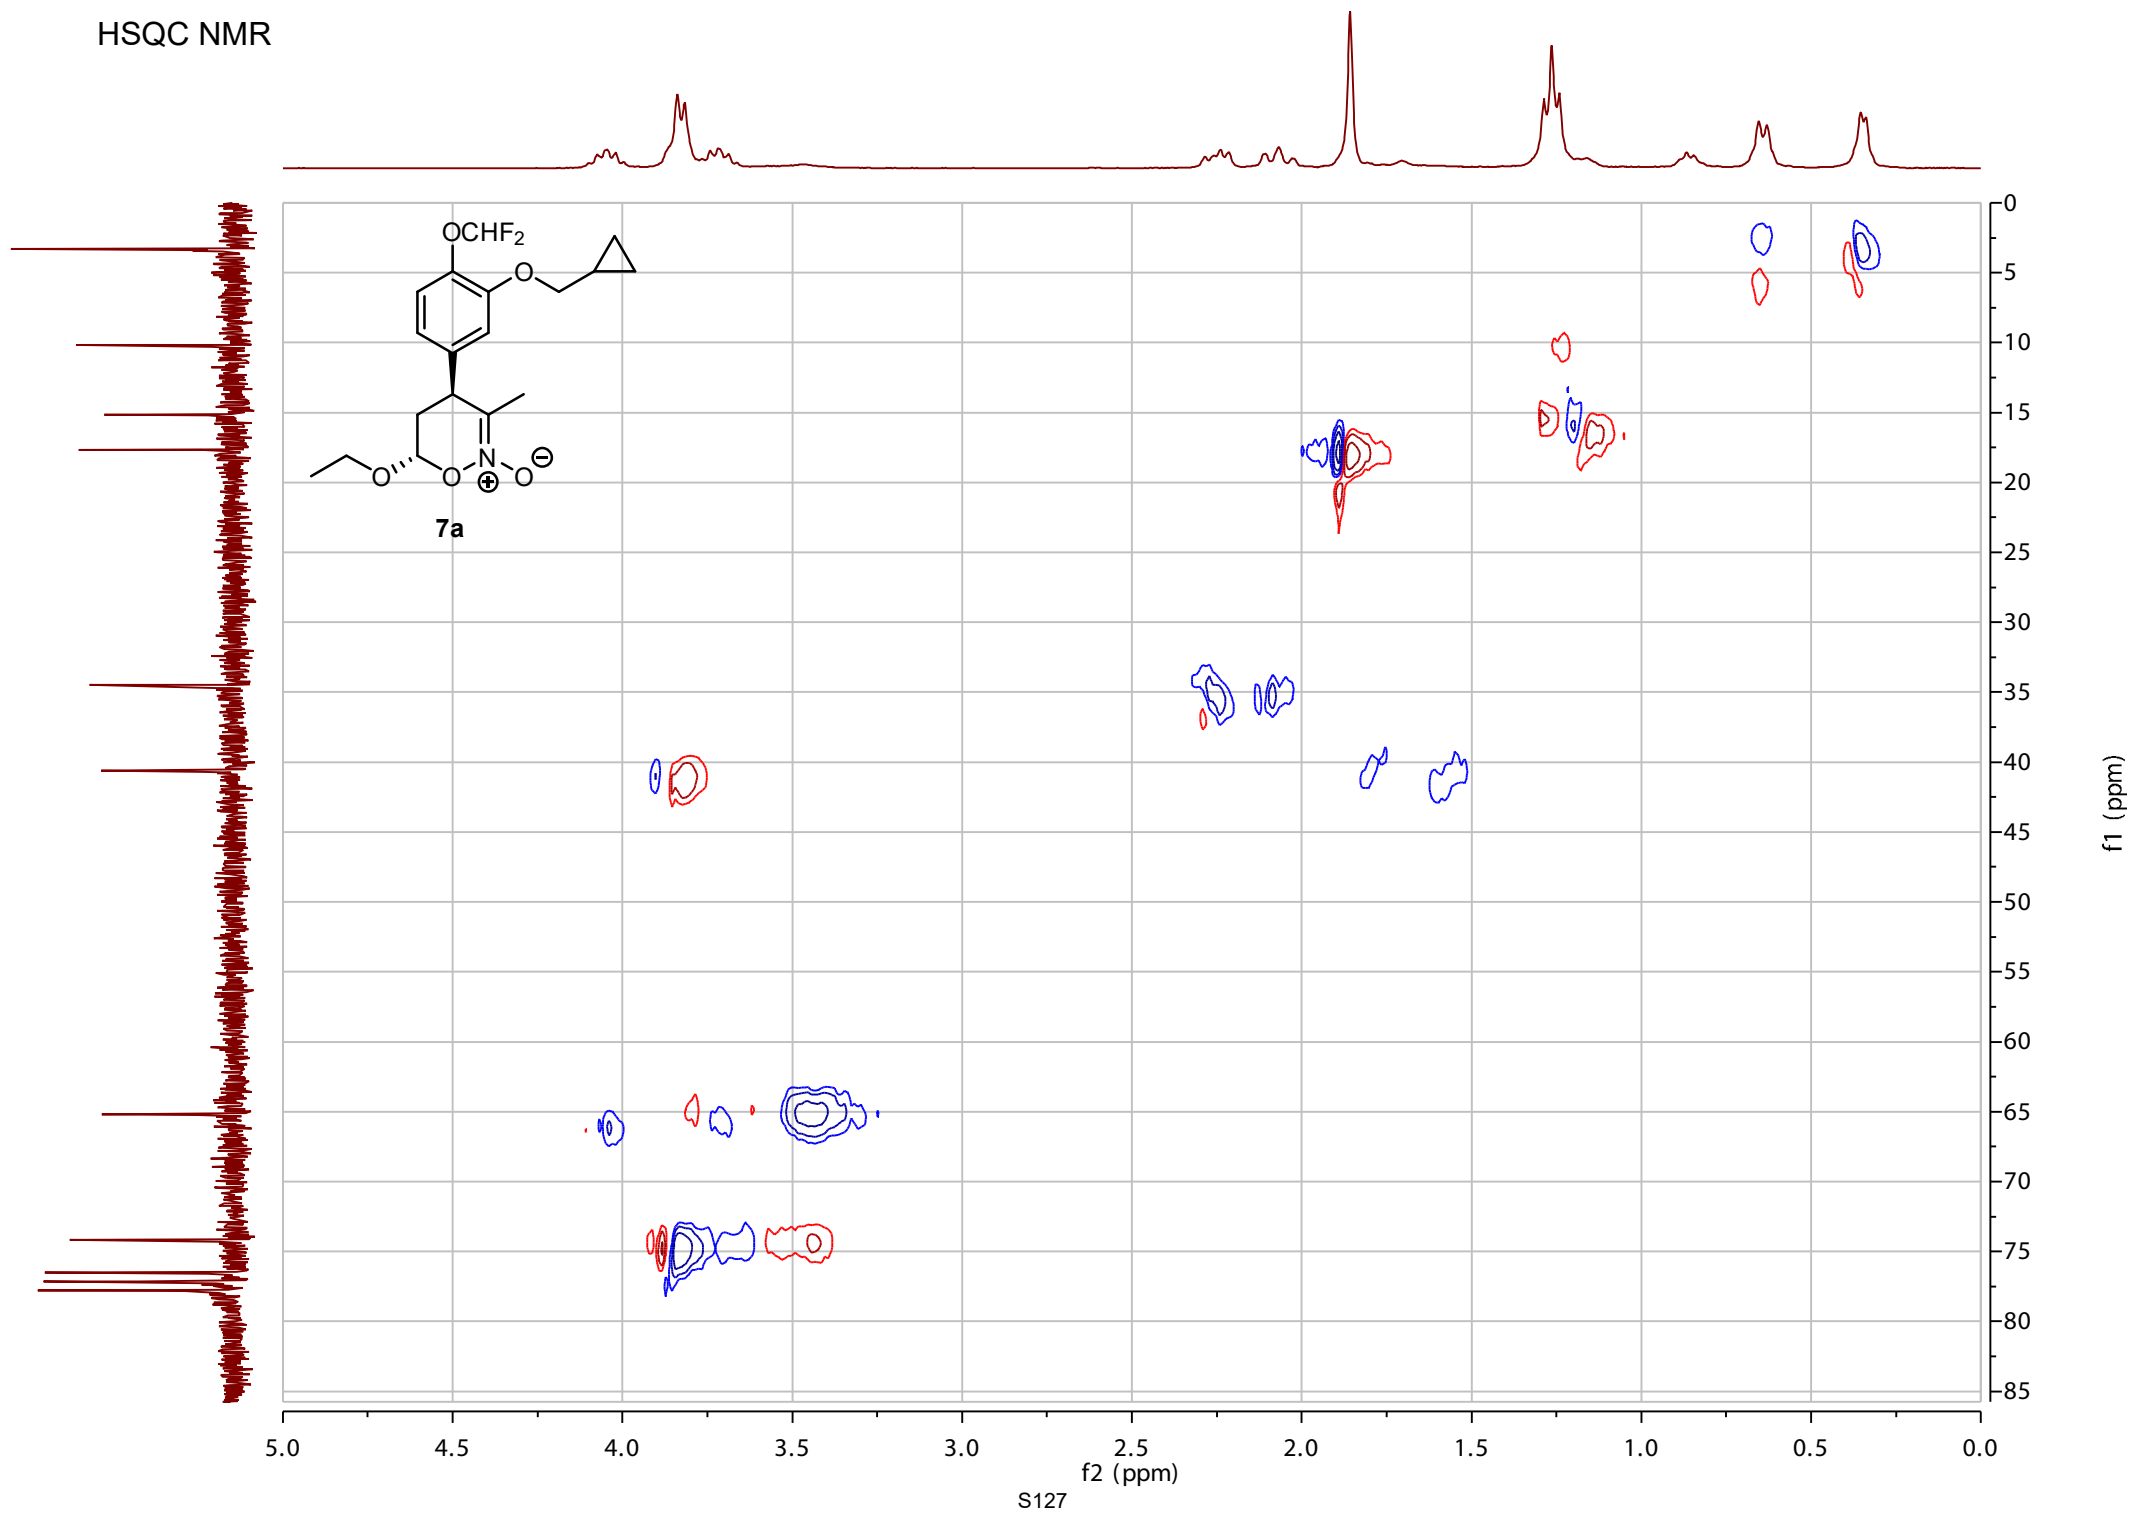

<sup>1</sup>H NMR (300 MHz, CDCl<sub>3</sub>)

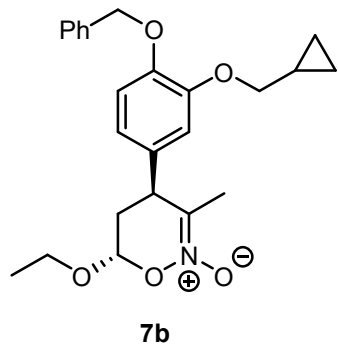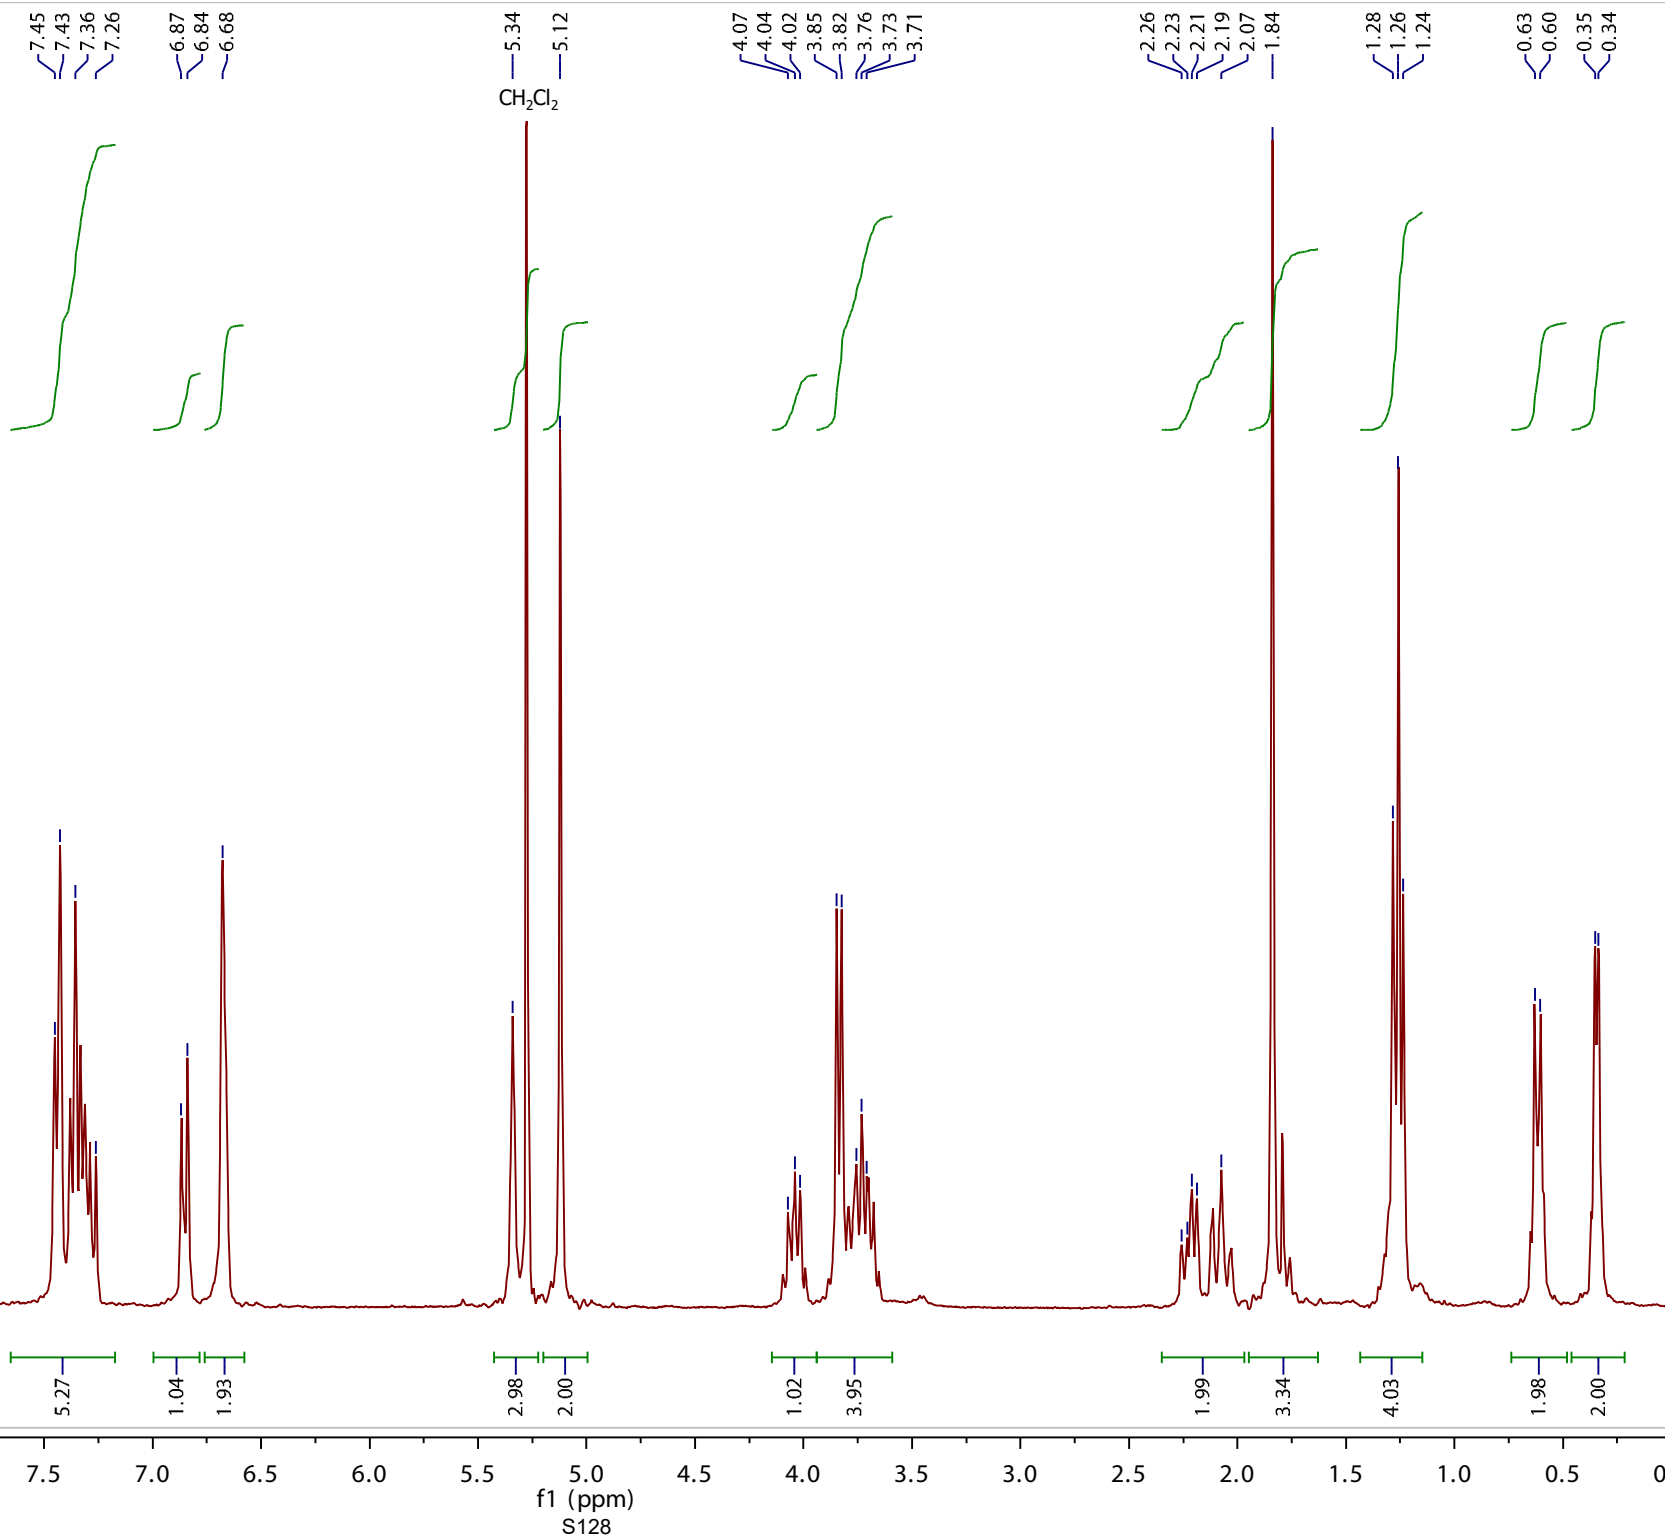



$^{13}\text{C}$  NMR (75 MHz,  $\text{CDCl}_3$ )

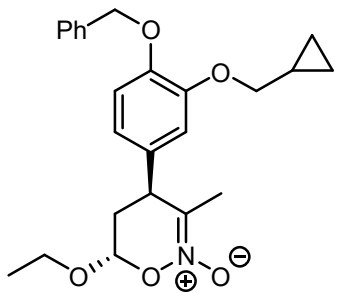

7b

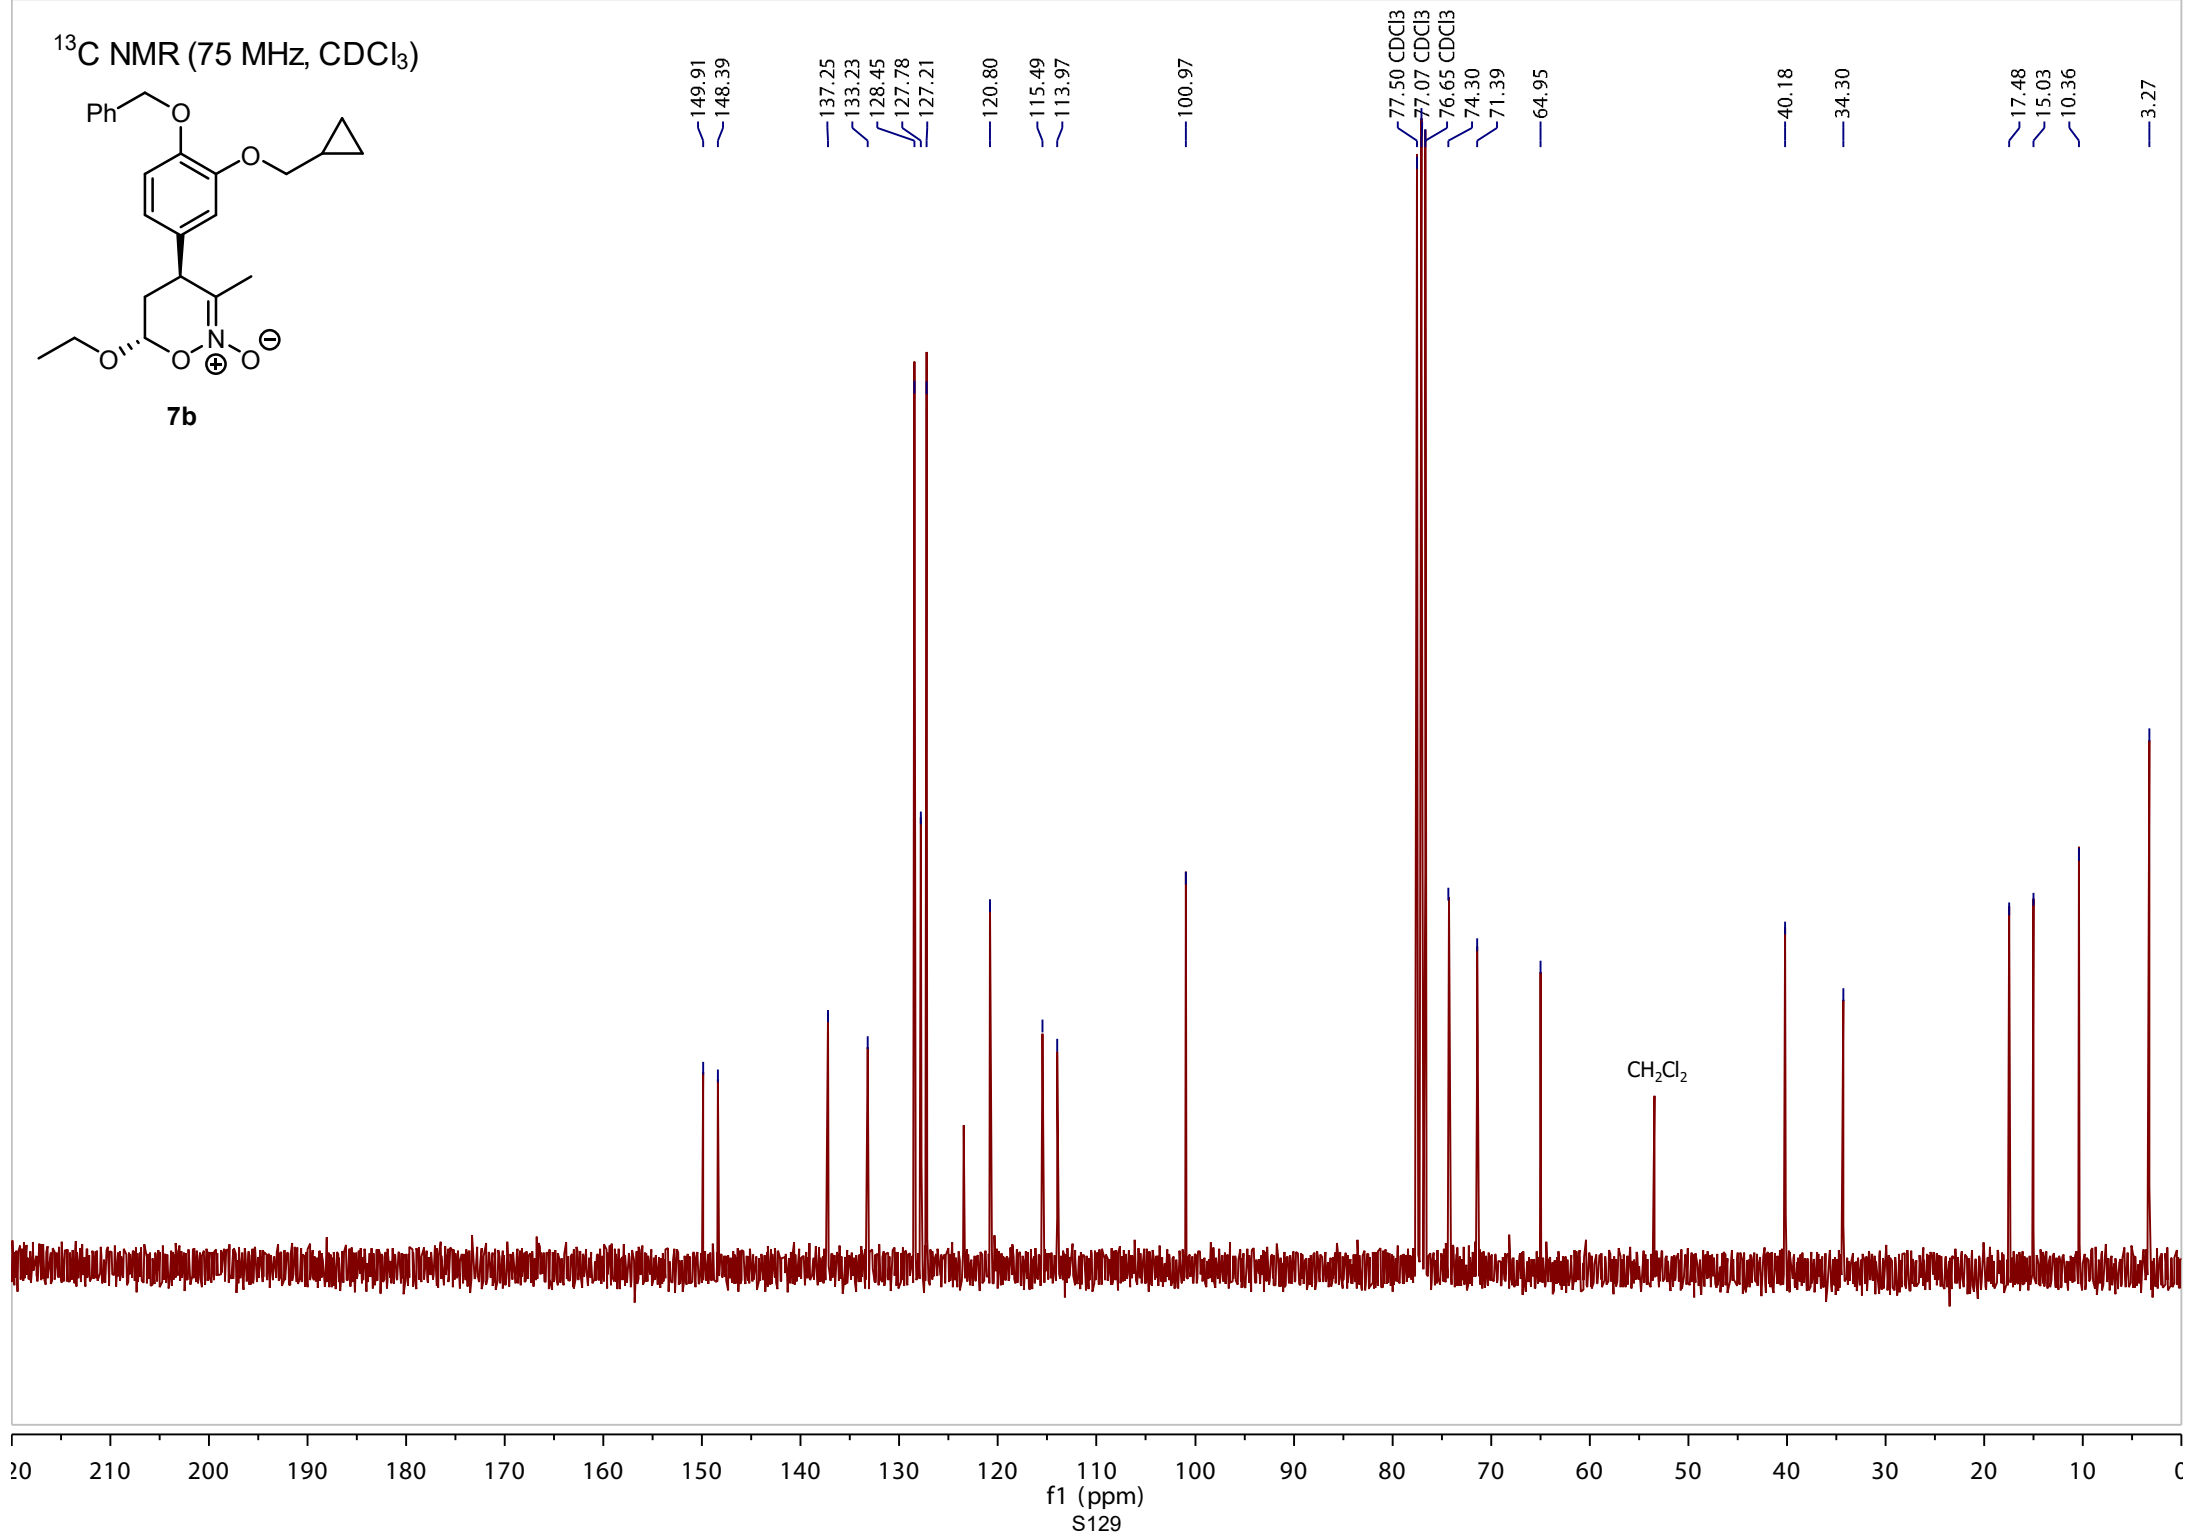

<sup>1</sup>H NMR (300 MHz, CDCl<sub>3</sub>)

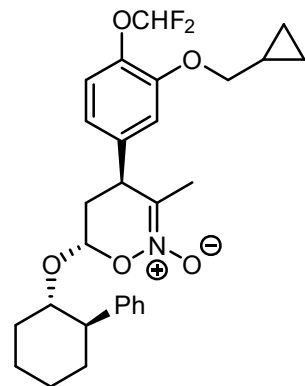

7c

7.33  
7.30  
7.28  
7.26  
7.23  
7.15  
7.13  
7.11  
7.05  
7.02  
6.82  
6.58  
6.57  
6.56  
6.55  
6.52  
6.31

5.53

4.16  
4.15

3.78  
3.76

3.14

2.58  
2.36  
2.32

1.97  
1.90  
1.86  
1.80

1.58  
1.54  
1.39  
1.27  
1.24

0.63  
0.61

0.33  
0.32

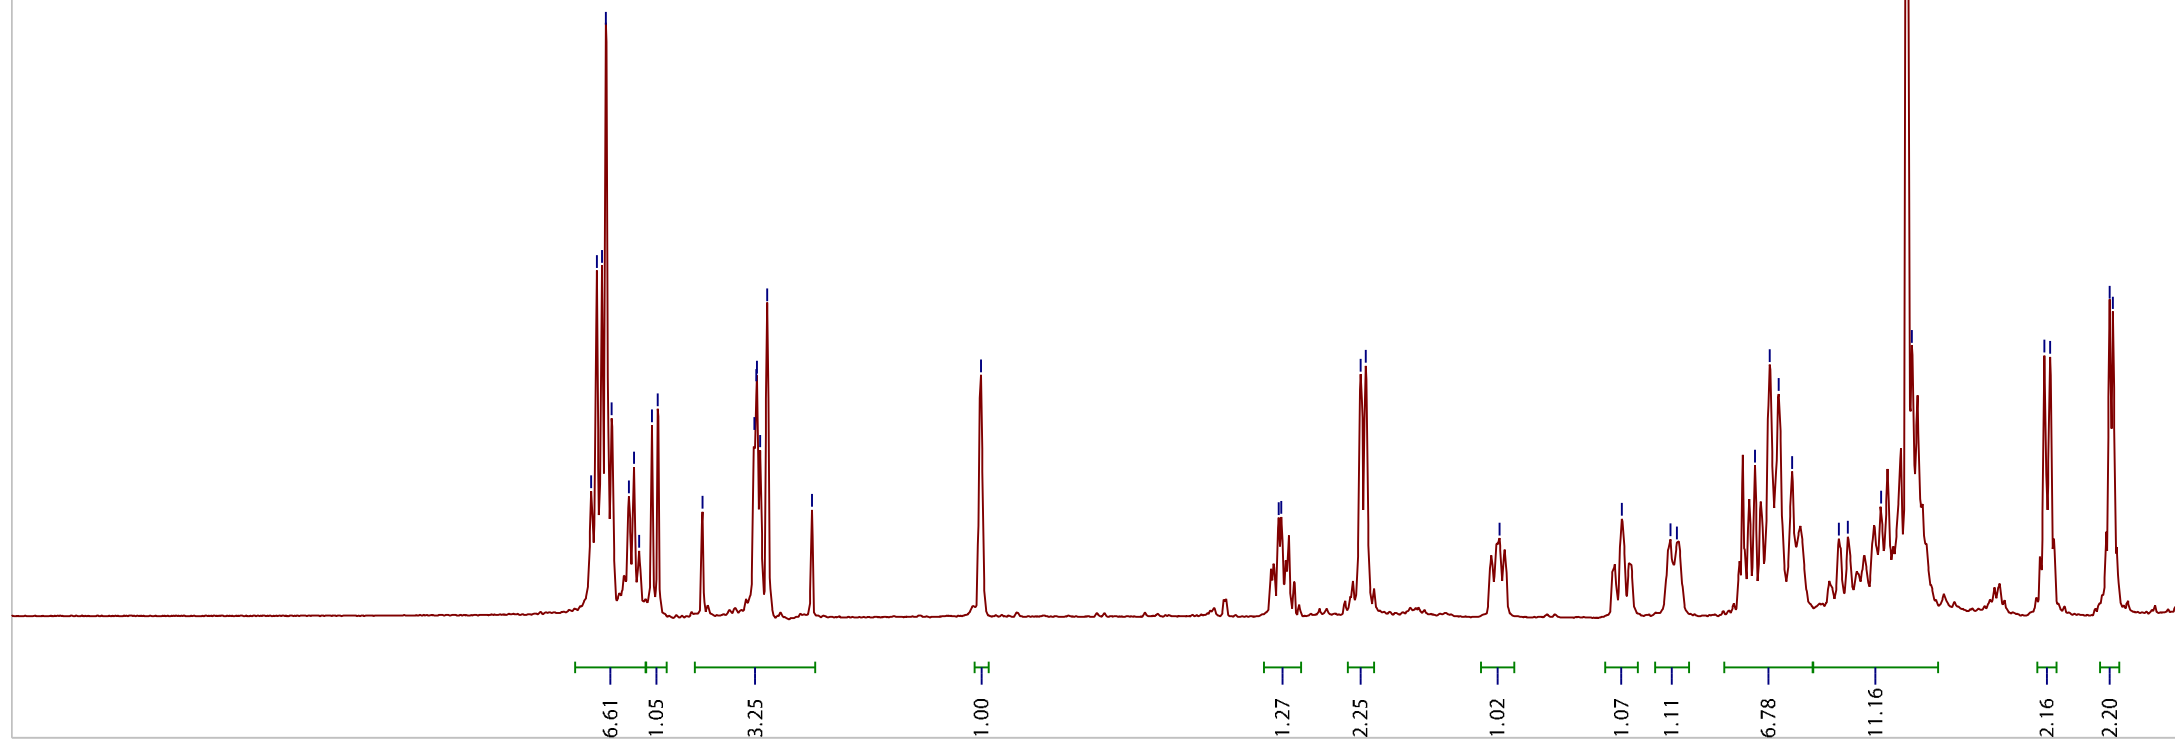

$^{13}\text{C}$  NMR (75 MHz,  $\text{CDCl}_3$ )

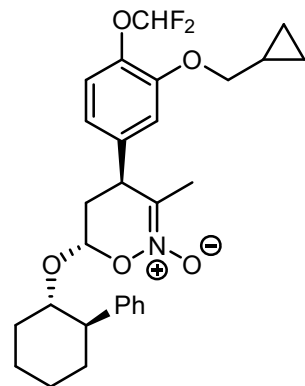

7c

151.08  
150.51  
144.24  
138.78  
128.31  
127.61  
126.14  
123.12  
122.31  
120.84  
119.56  
116.12  
113.48  
112.68  
95.02  
77.16  
76.28  
74.08  
50.99  
39.84  
34.14  
33.99  
30.13  
26.10  
24.51  
17.23  
10.12  
3.22

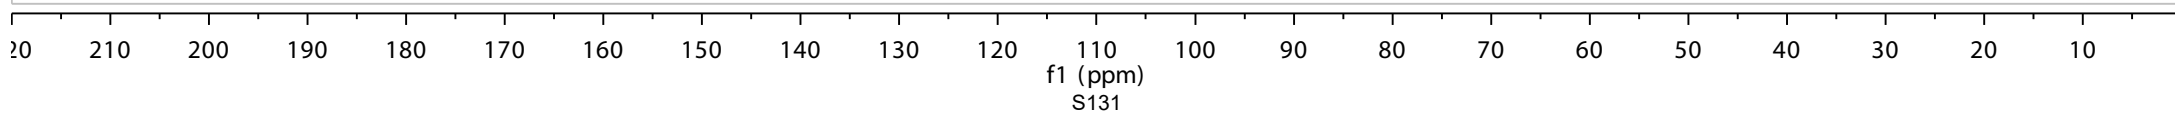

$^{19}\text{F}$  NMR (282 MHz,  $\text{CDCl}_3$ )

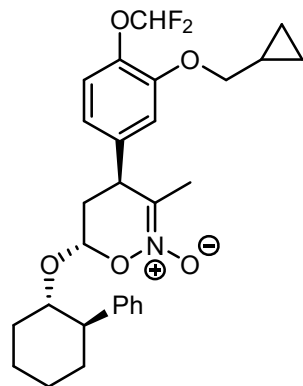

**7c**

-82.37  
-82.64

f1 (ppm)  
S132

# COSY NMR

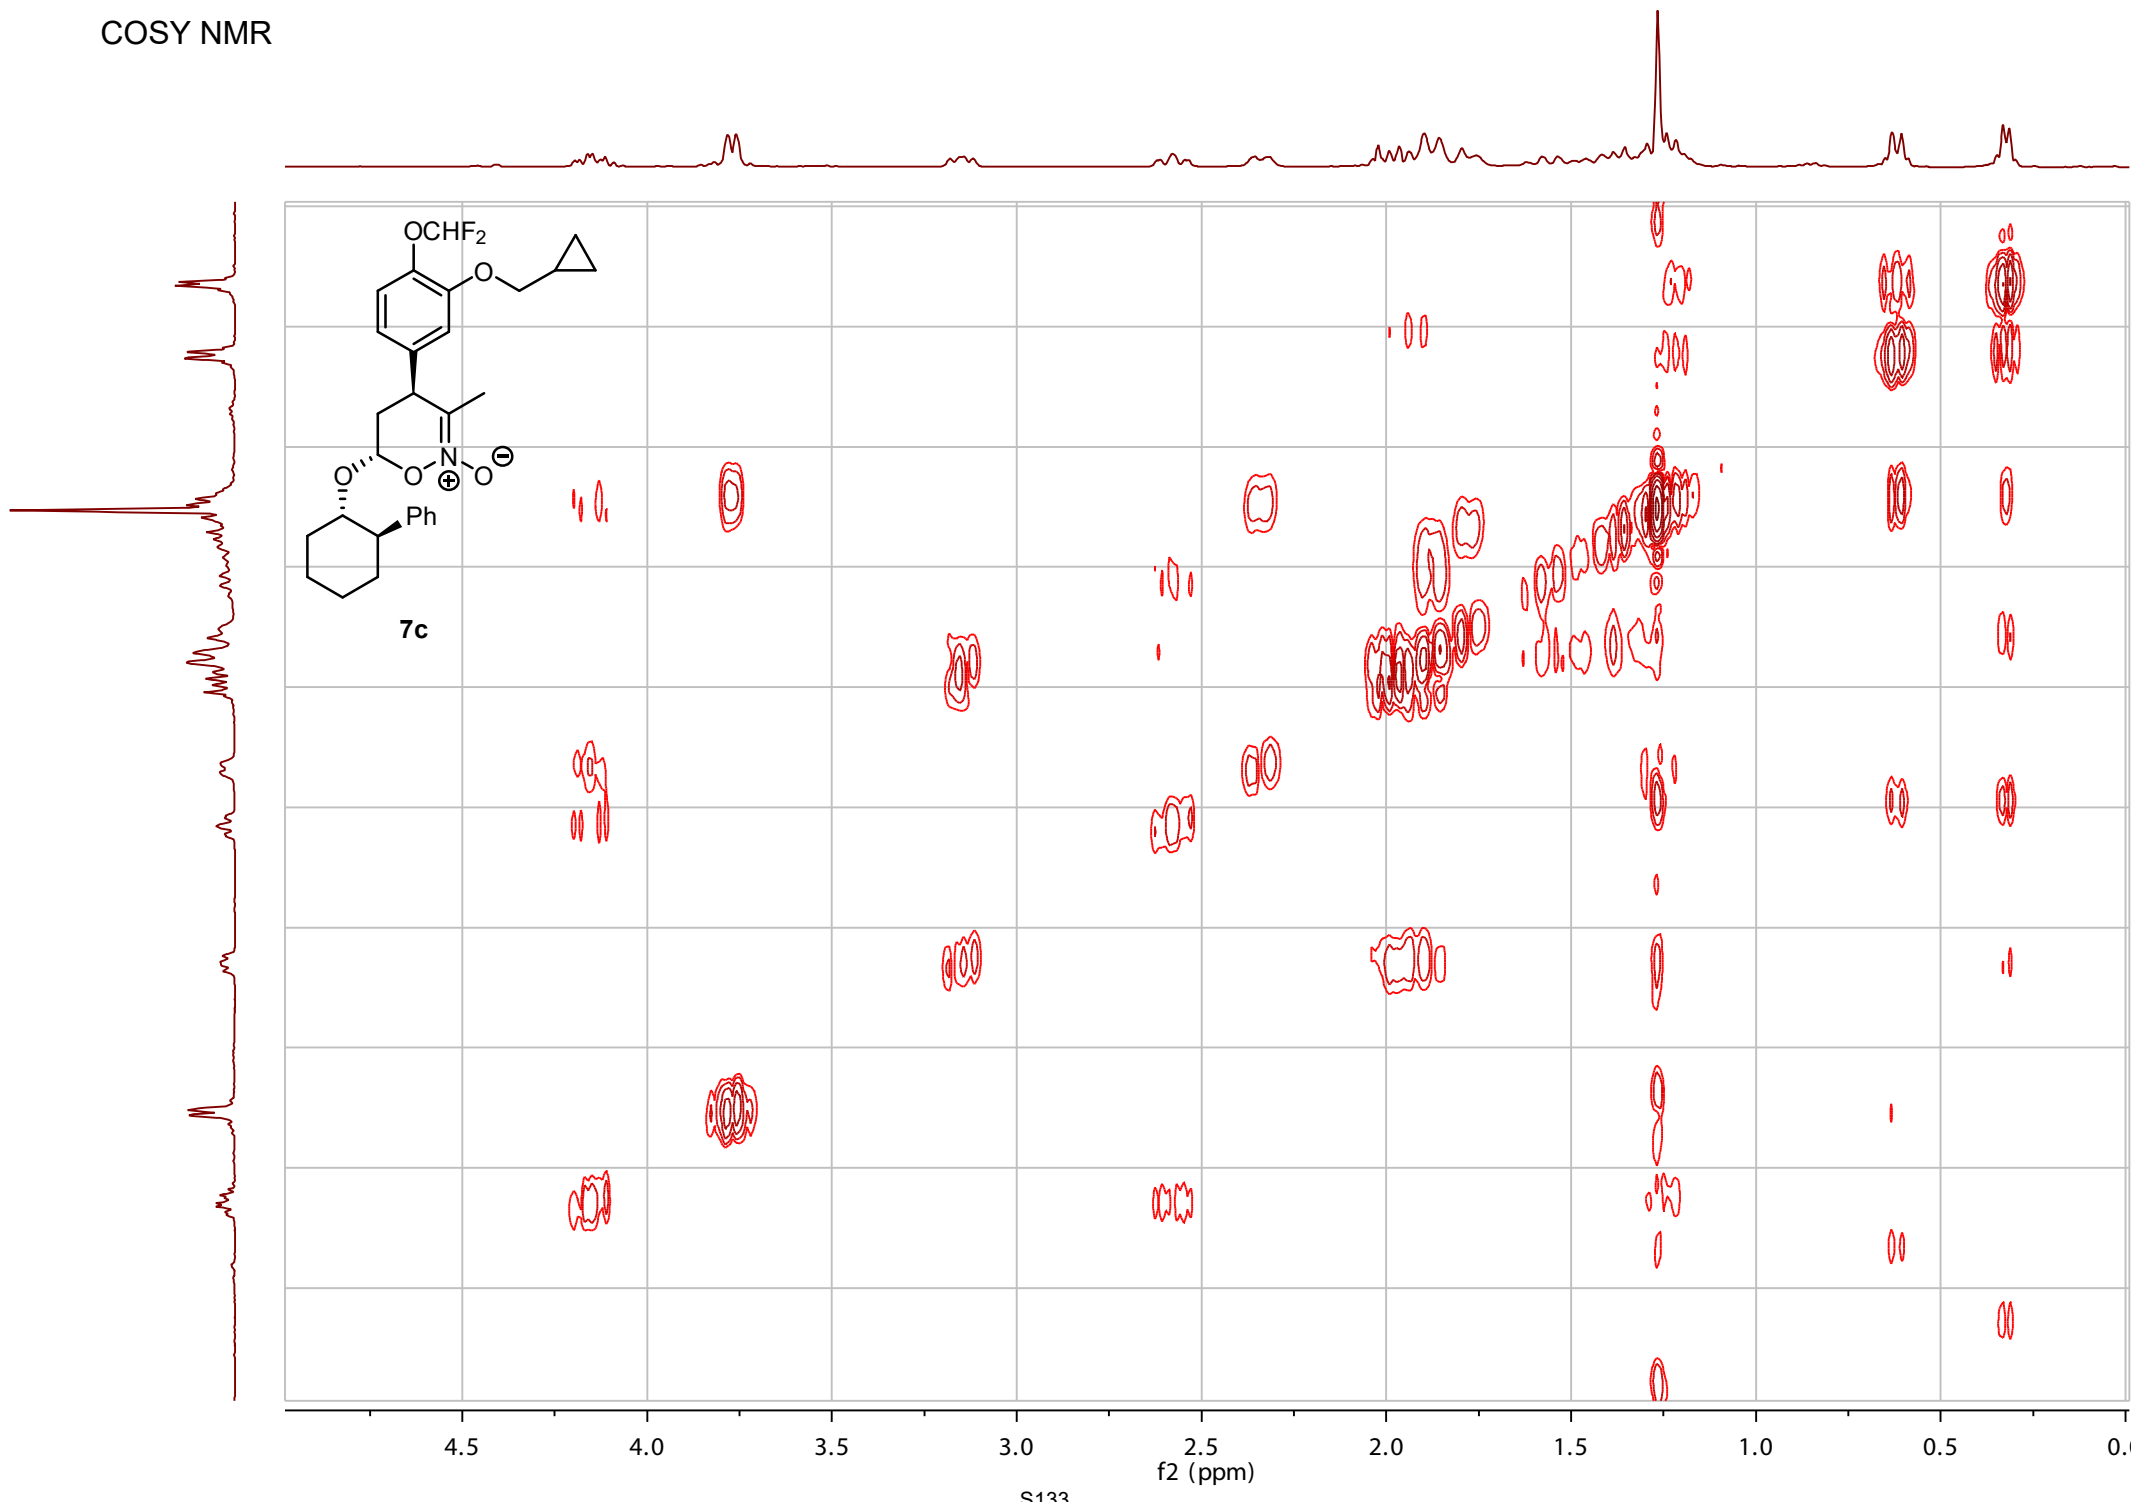

# HSQC NMR

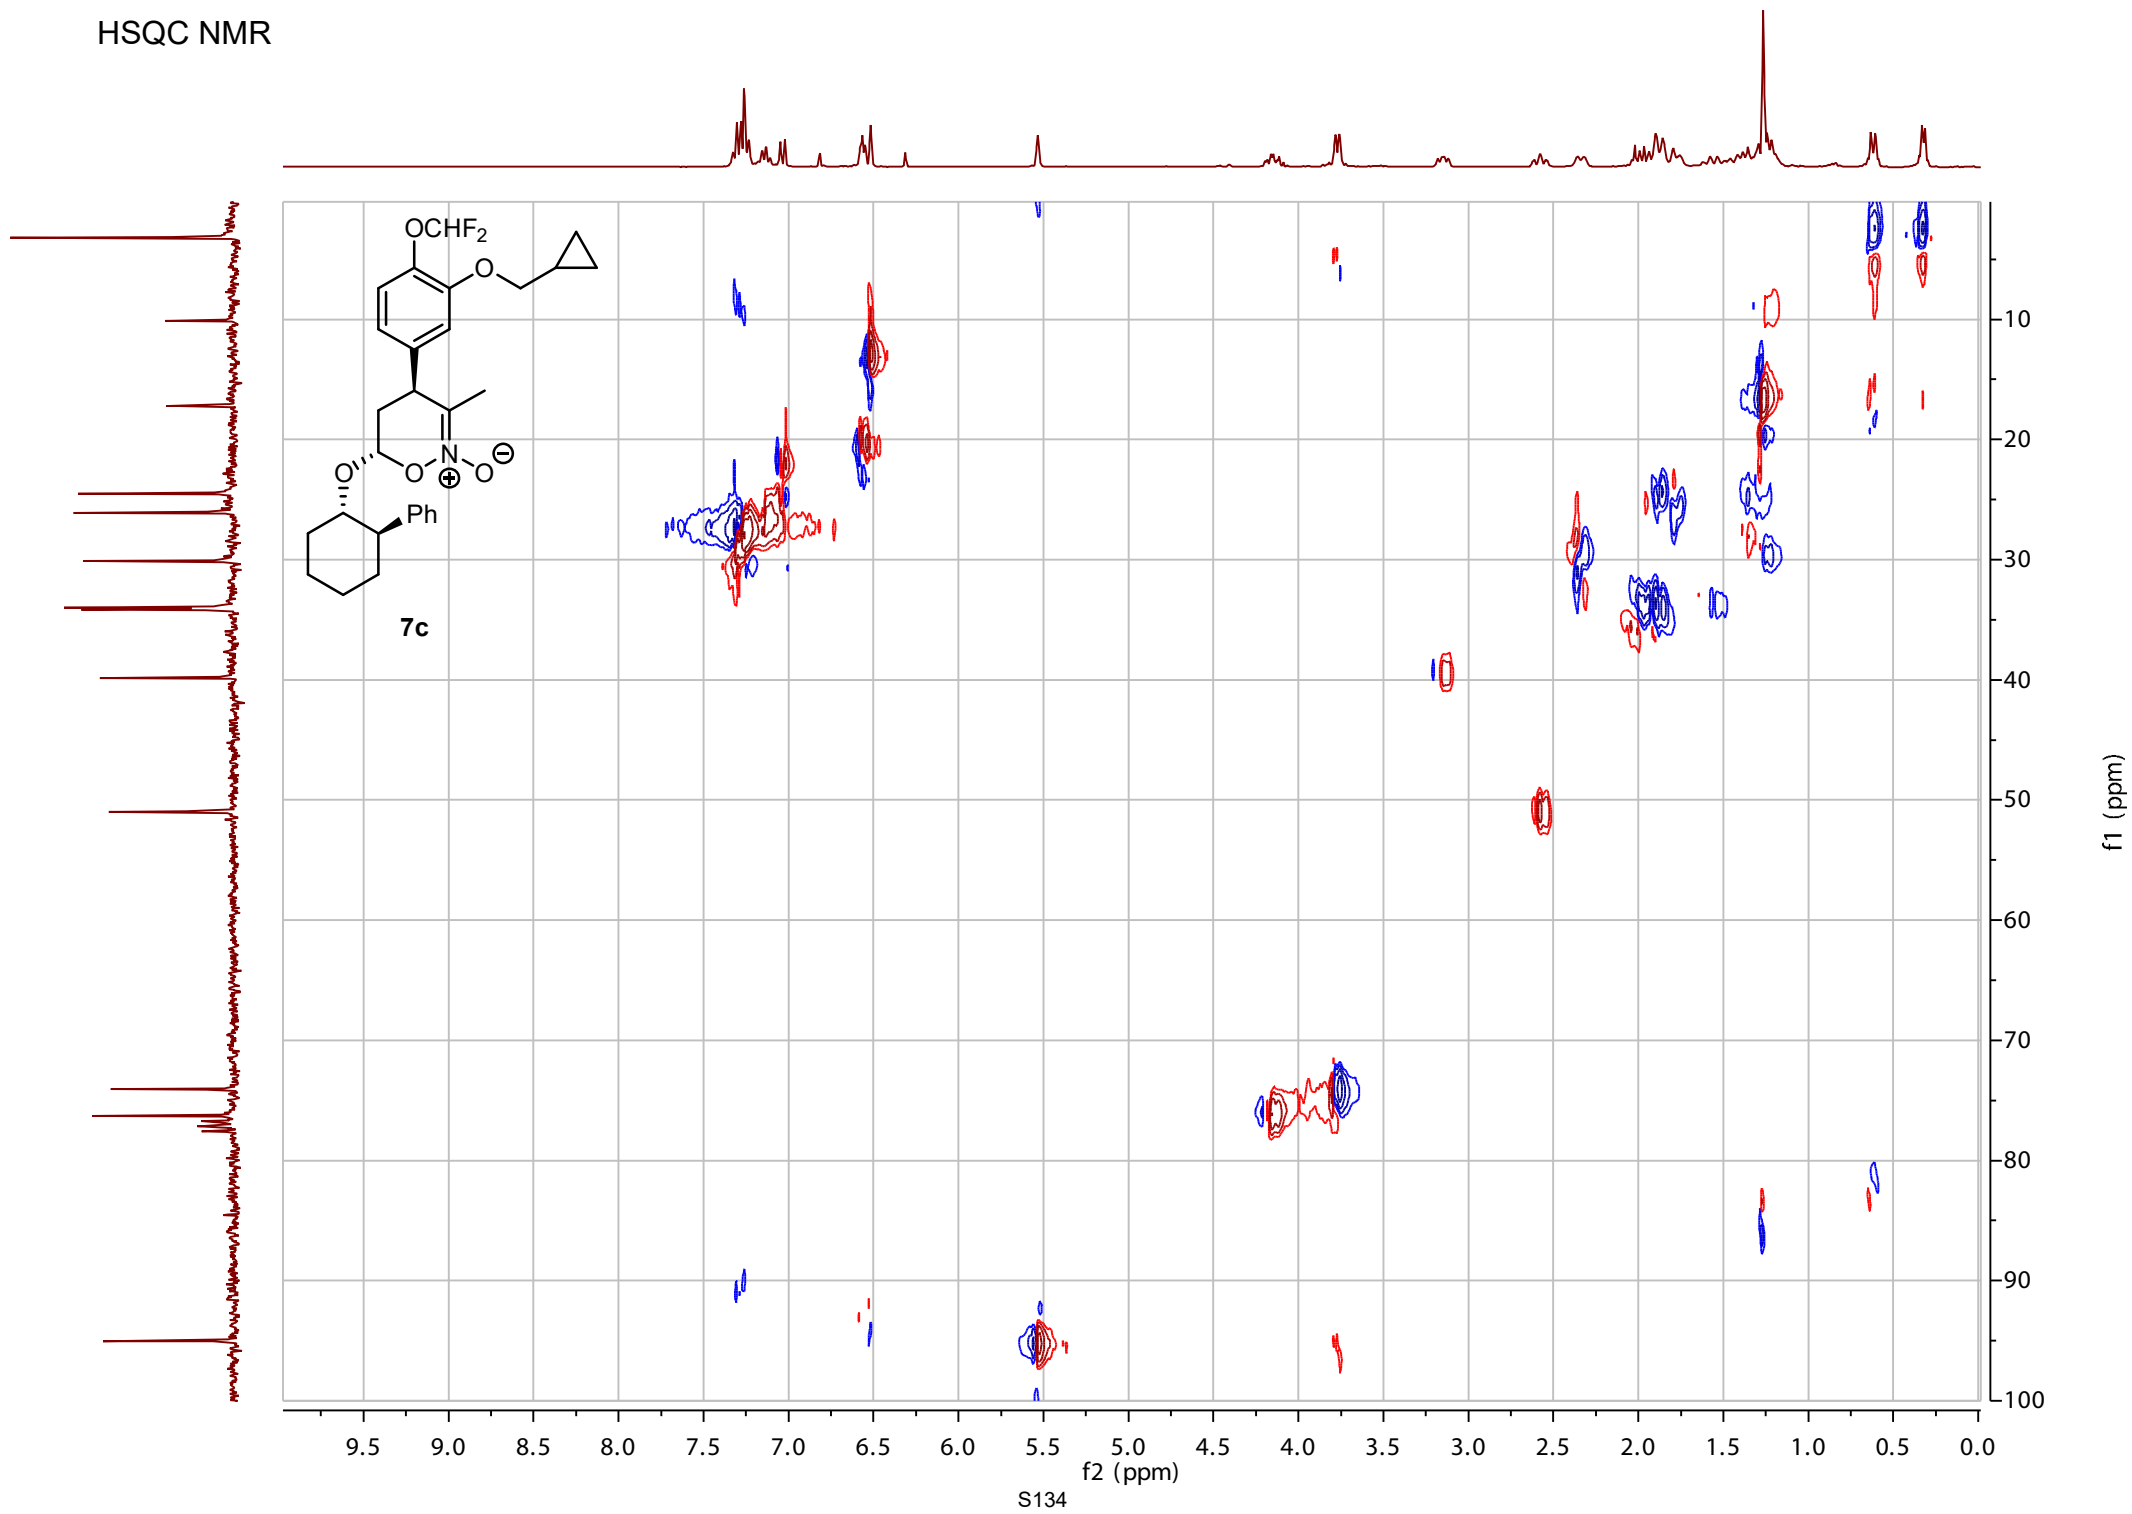

<sup>1</sup>H NMR (300 MHz, CDCl<sub>3</sub>)

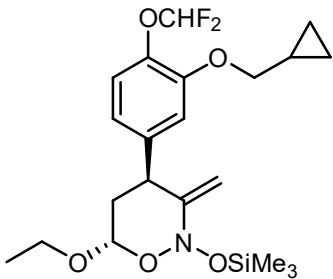

9a

7.26  
7.09  
7.07  
6.90  
6.87  
6.85  
6.59  
6.34

5.04  
4.96

4.10  
3.95  
3.95  
3.85  
3.83  
3.55

2.20  
2.10

1.23

0.62  
0.59  
0.33  
0.31  
0.24

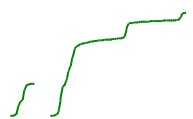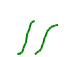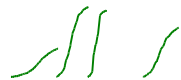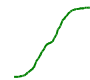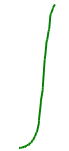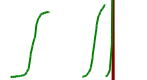

1.0 9.5 9.0 8.5 8.0 7.5 7.0 6.5 6.0 5.5 5.0 4.5 4.0 3.5 3.0 2.5 2.0 1.5 1.0 0.5

f1 (ppm)  
S135

0.98

3.12

1.00

0.88

0.85

2.11

2.01

1.50

2.10

4.33

1.96

2.18

8.60

$^{13}\text{C}$  NMR (75 MHz,  $\text{CDCl}_3$ )

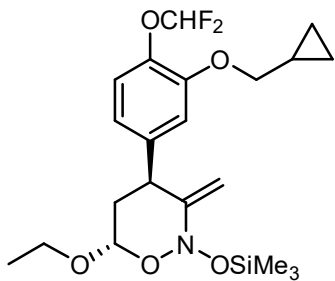

**9a**

150.40  
139.79  
139.41  
122.53  
121.22  
119.82  
116.39  
115.20  
112.95  
99.27  
97.94  
74.02  
64.15  
40.86  
36.48  
15.04  
10.25  
7.29  
3.18  
-0.78

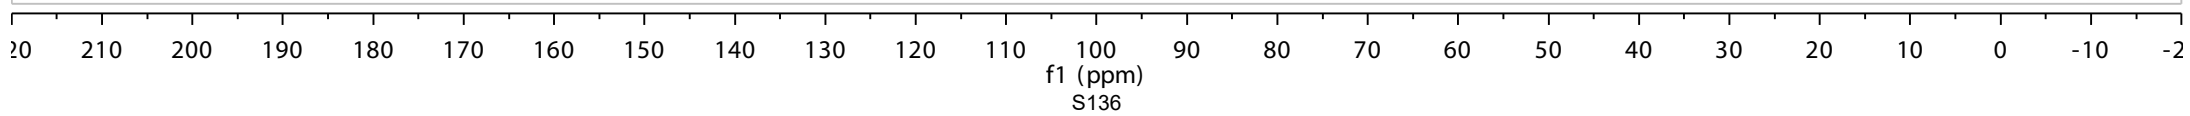



$^{19}\text{F}$  NMR (188 MHz,  $\text{CDCl}_3$ )



**9a**

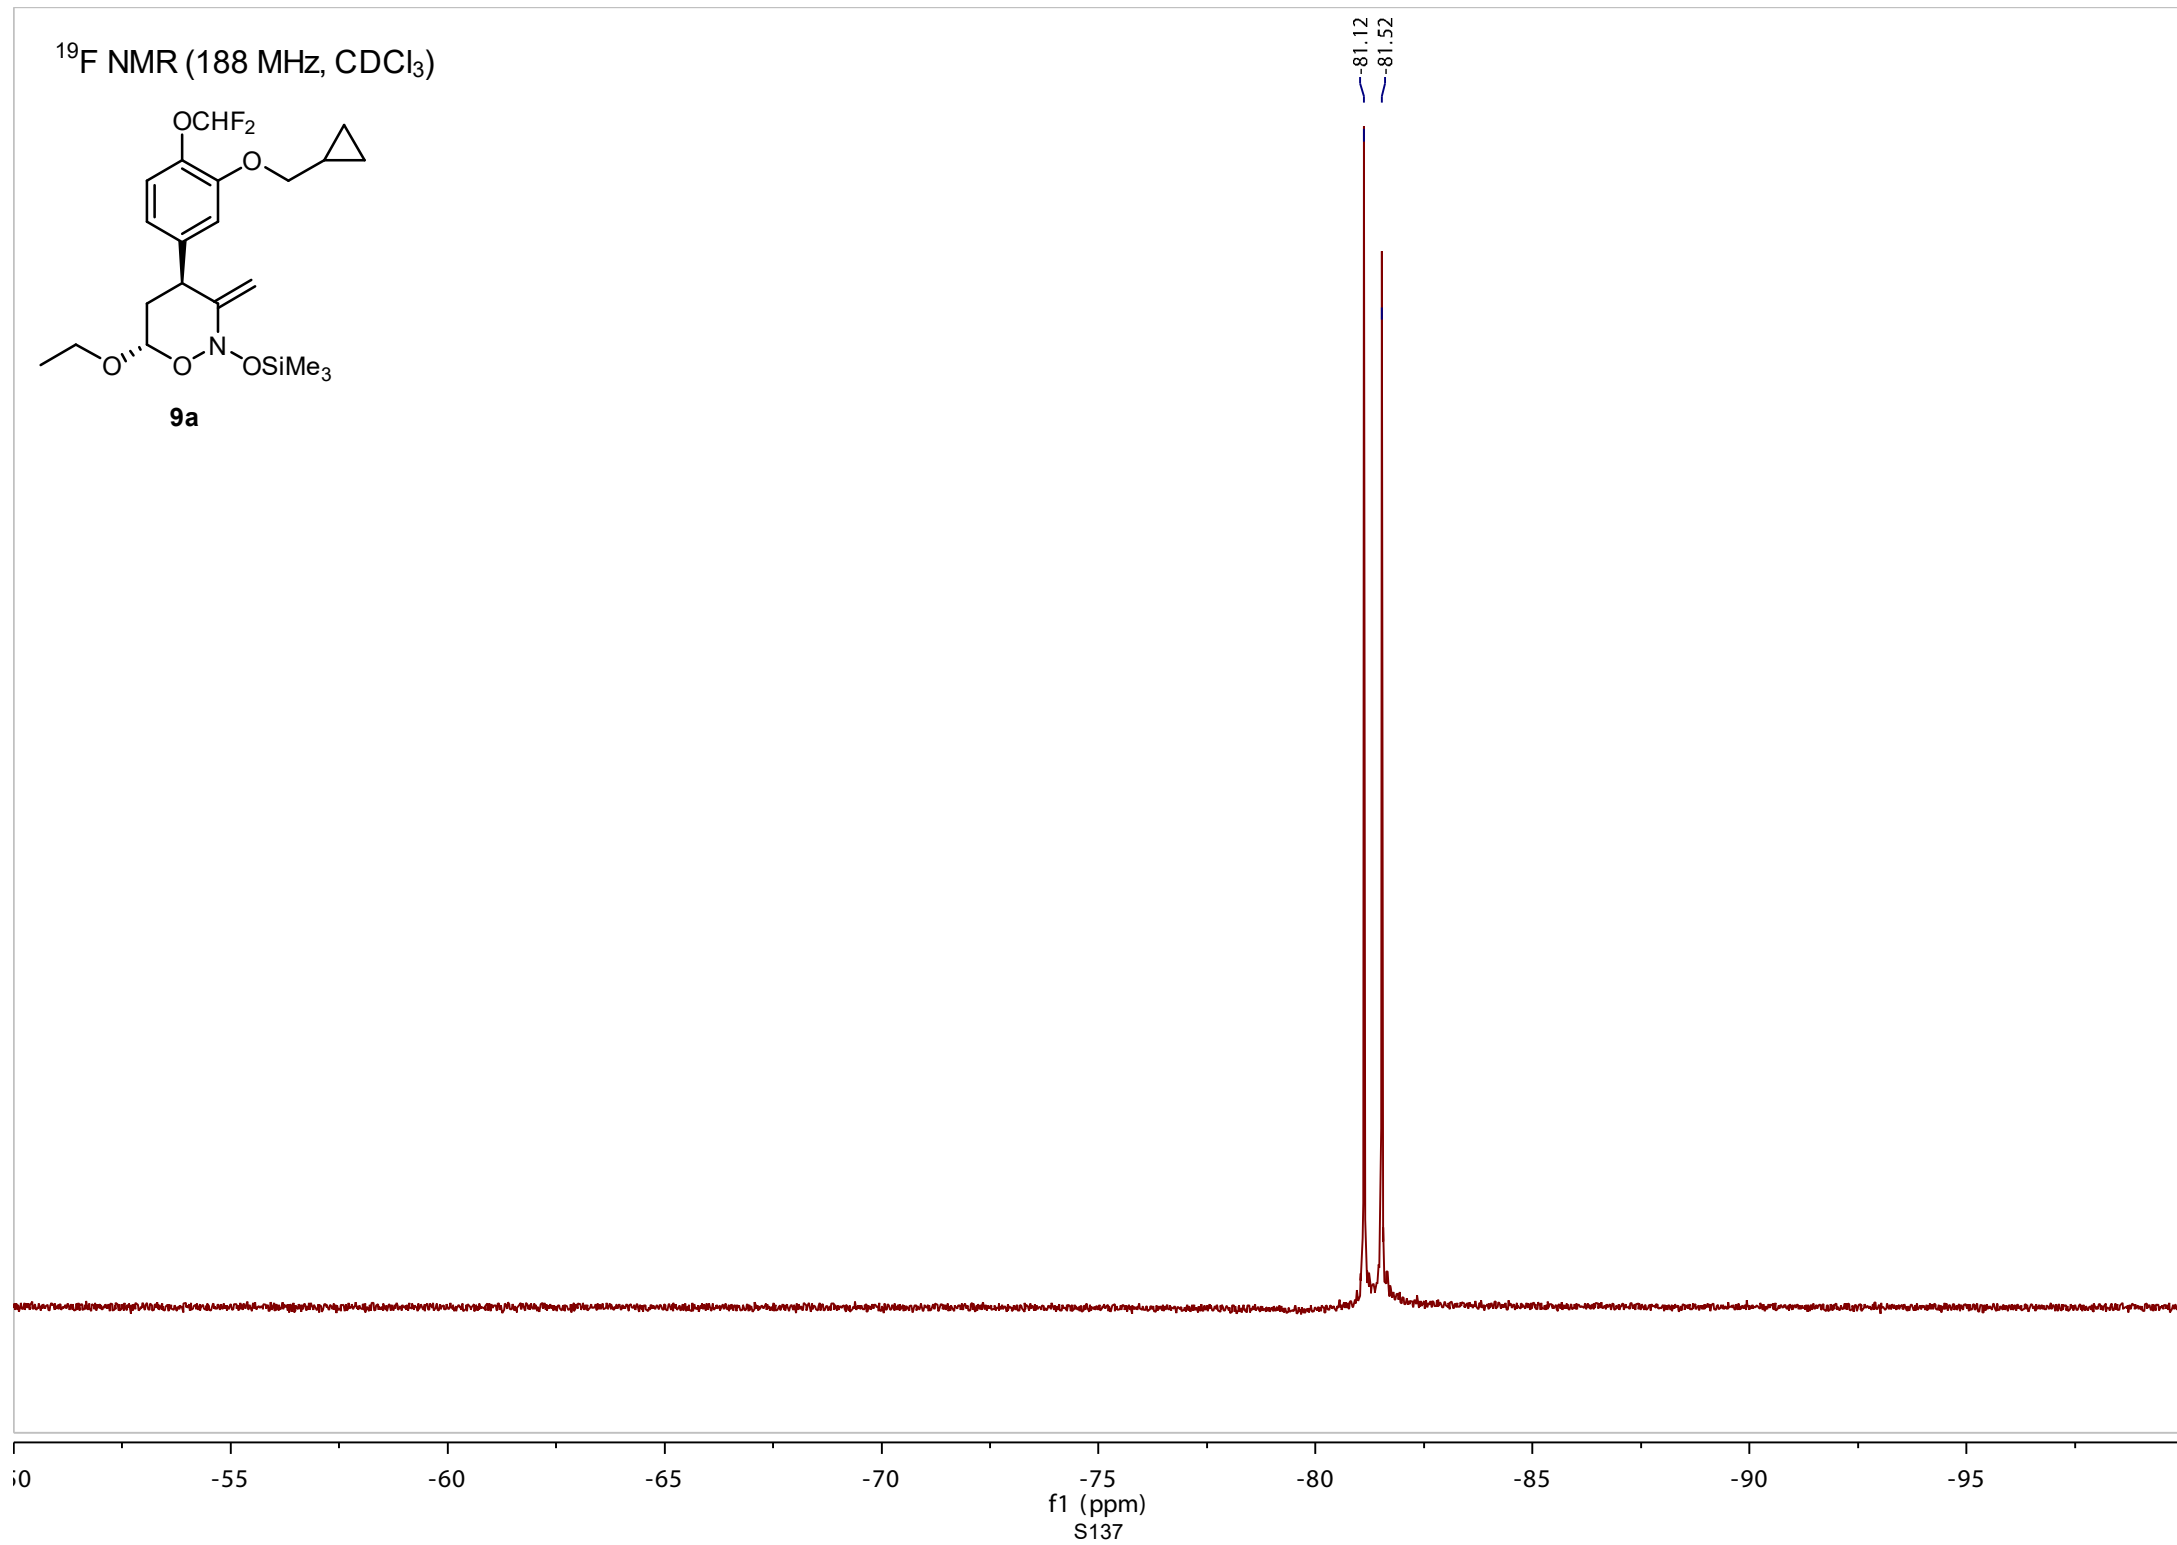

$^{29}\text{Si}$  NMR (40 MHz,  $\text{CDCl}_3$ )

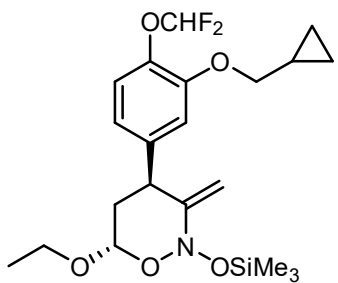

**9a**

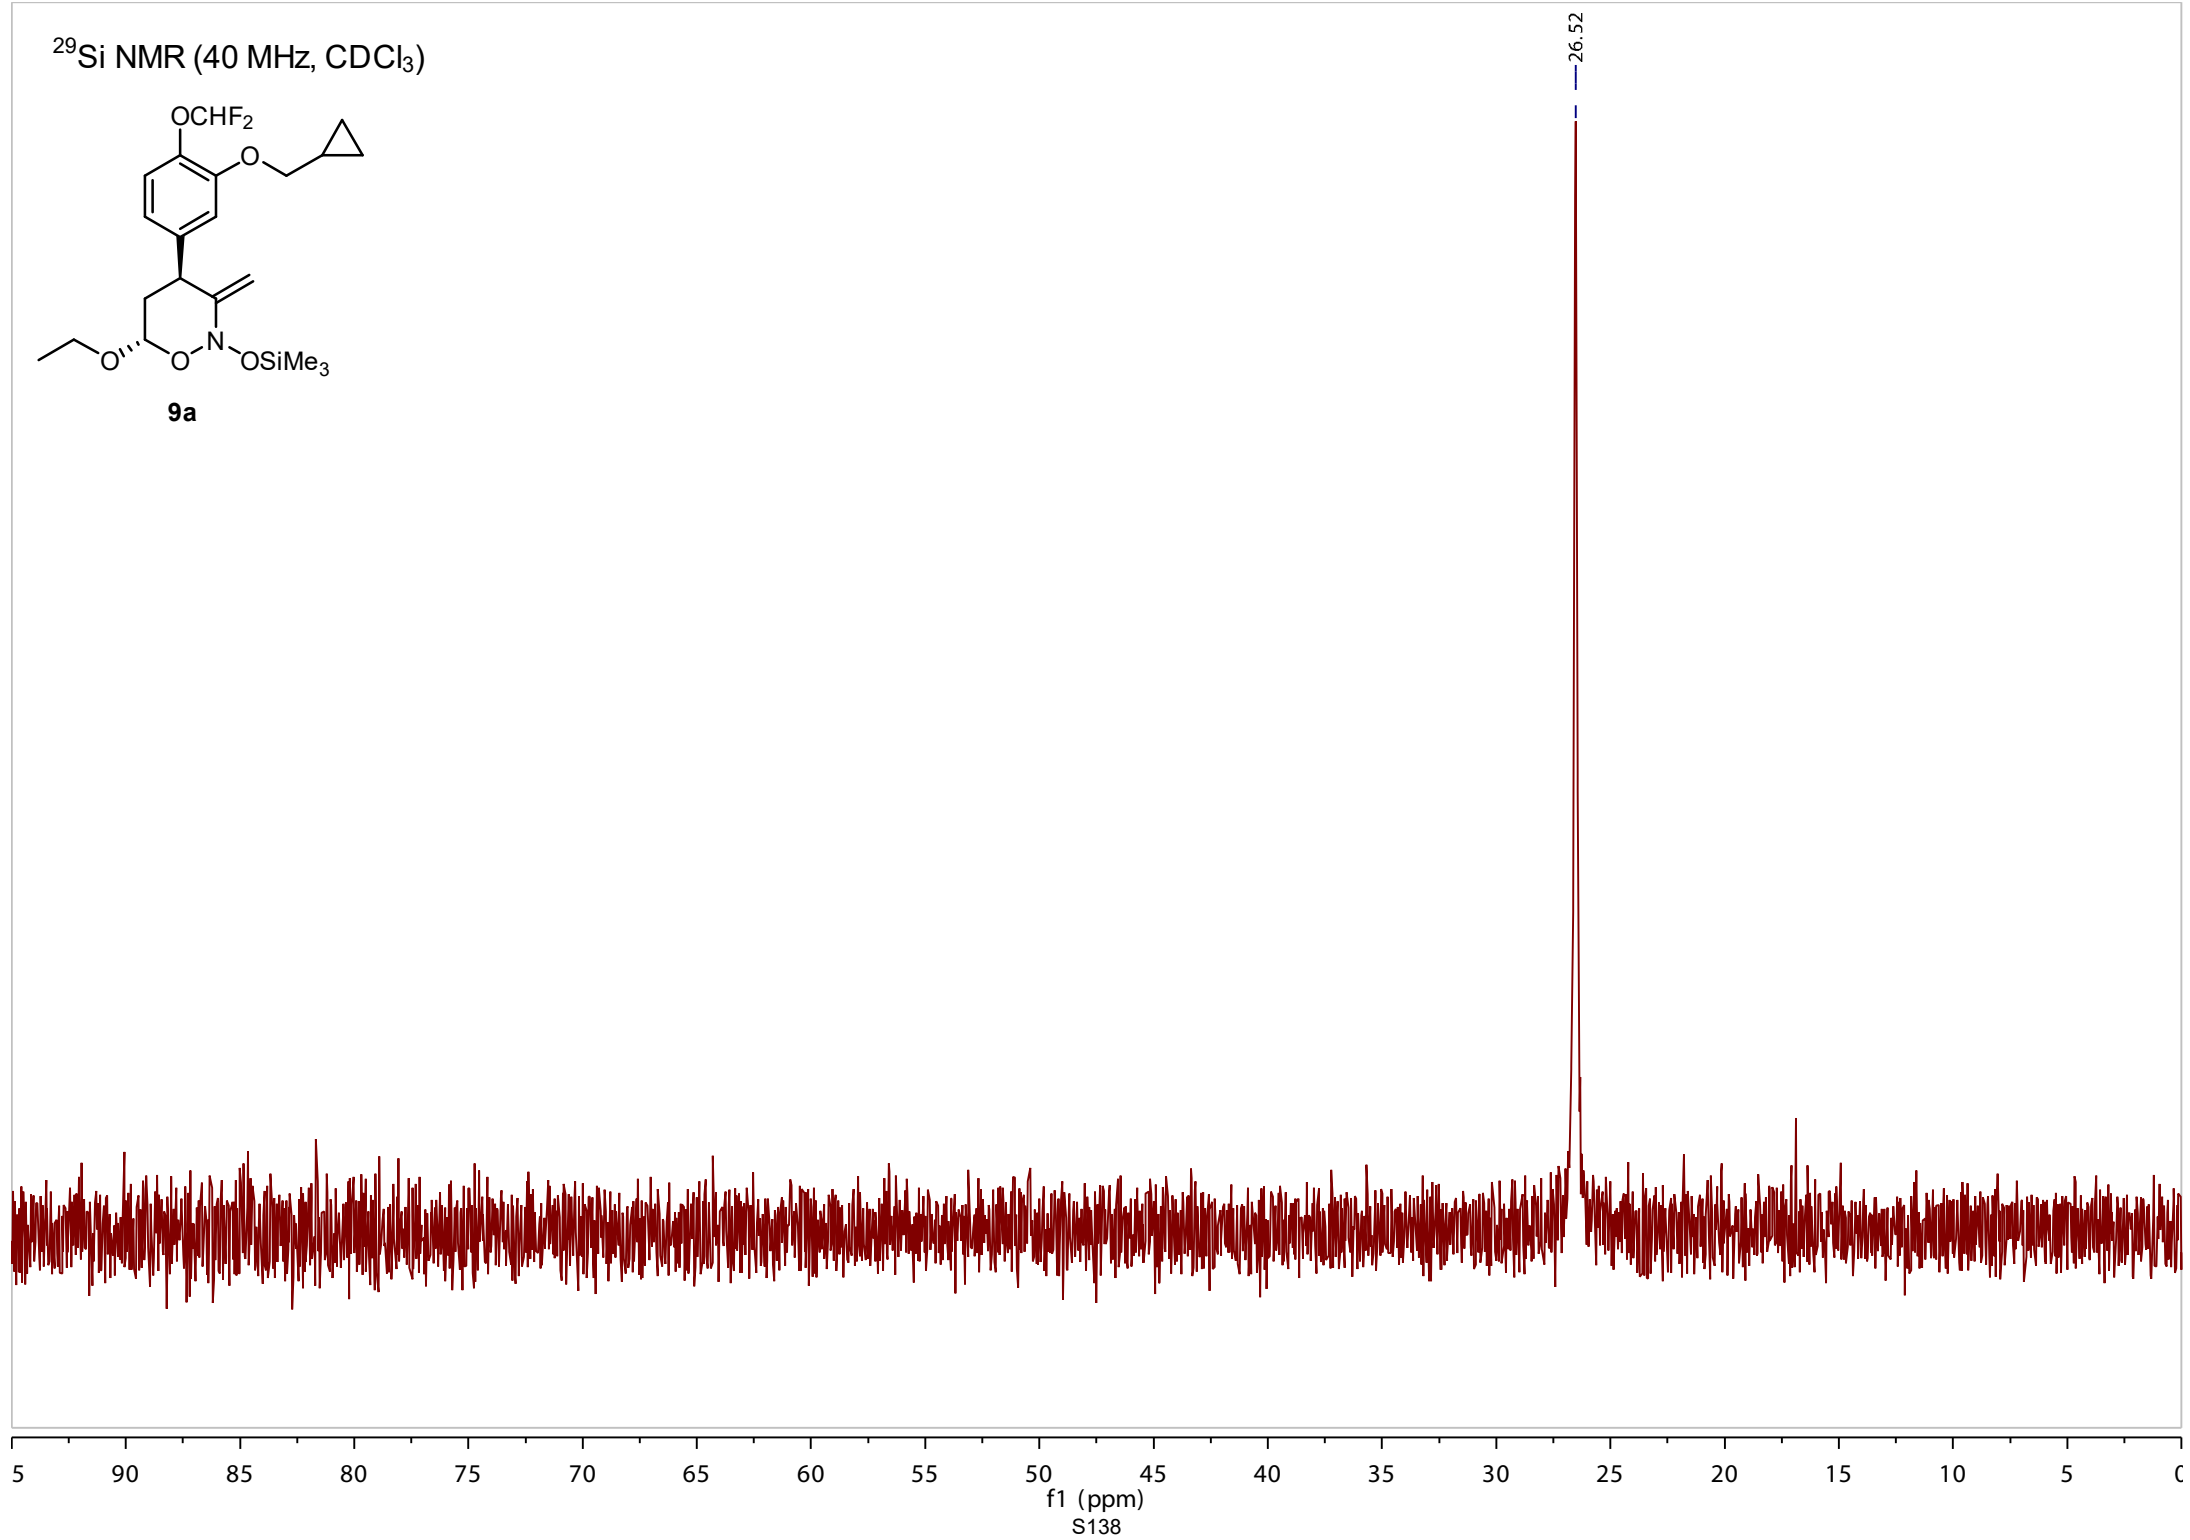

COSY NMR

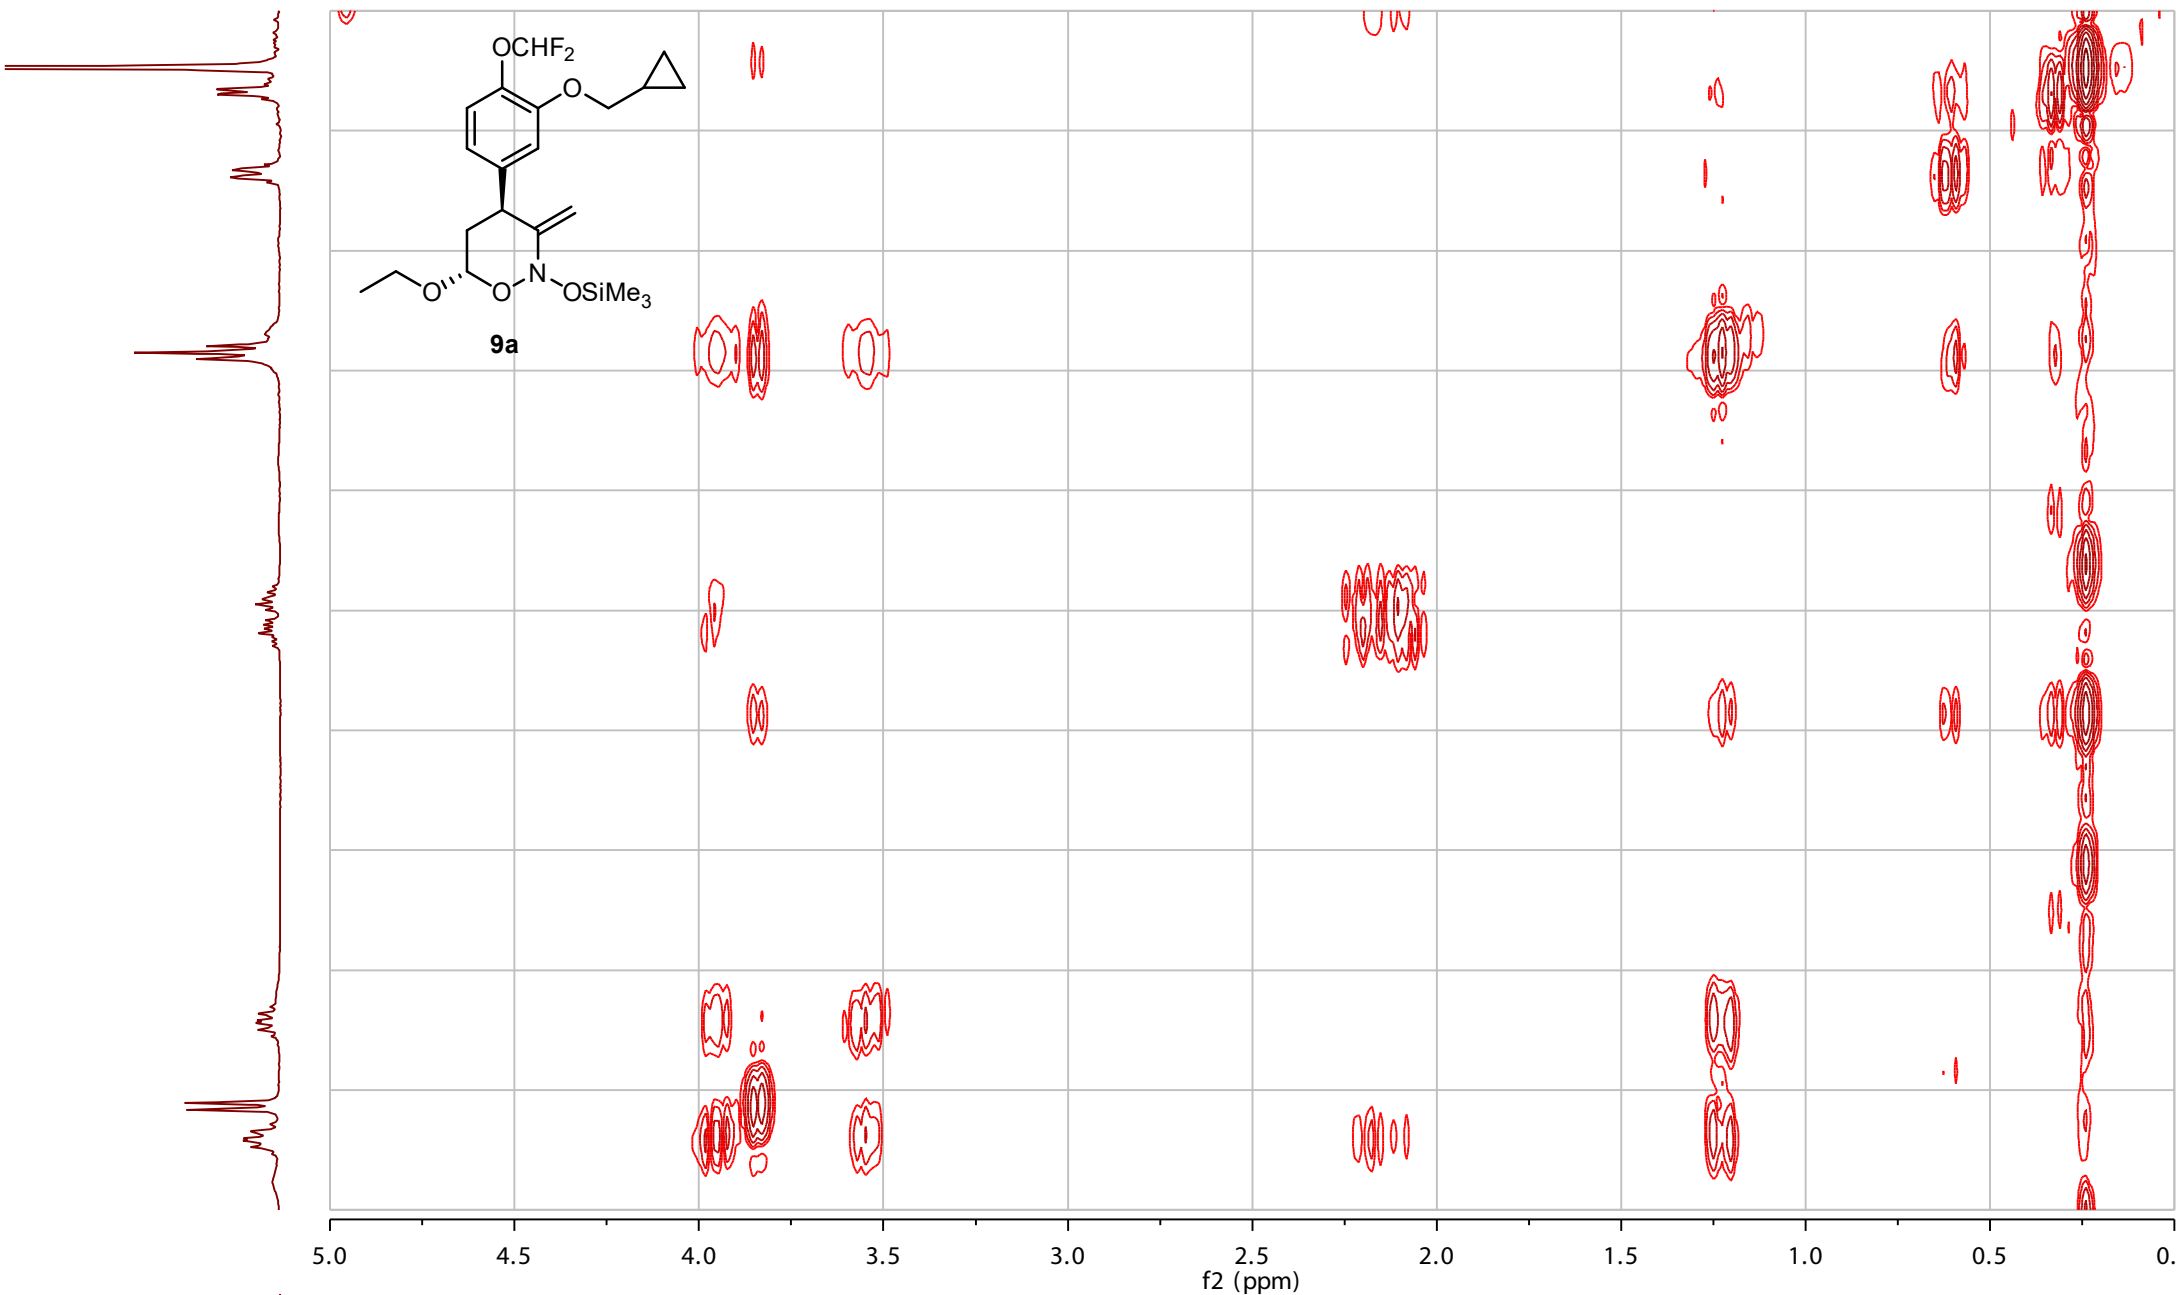

# HSQC NMR

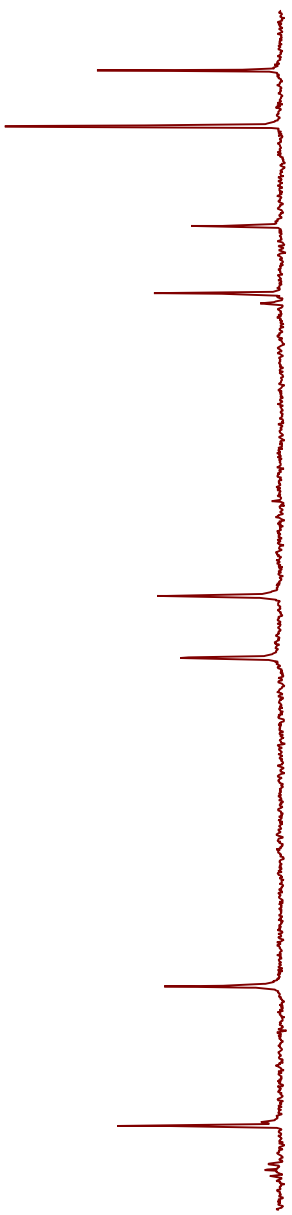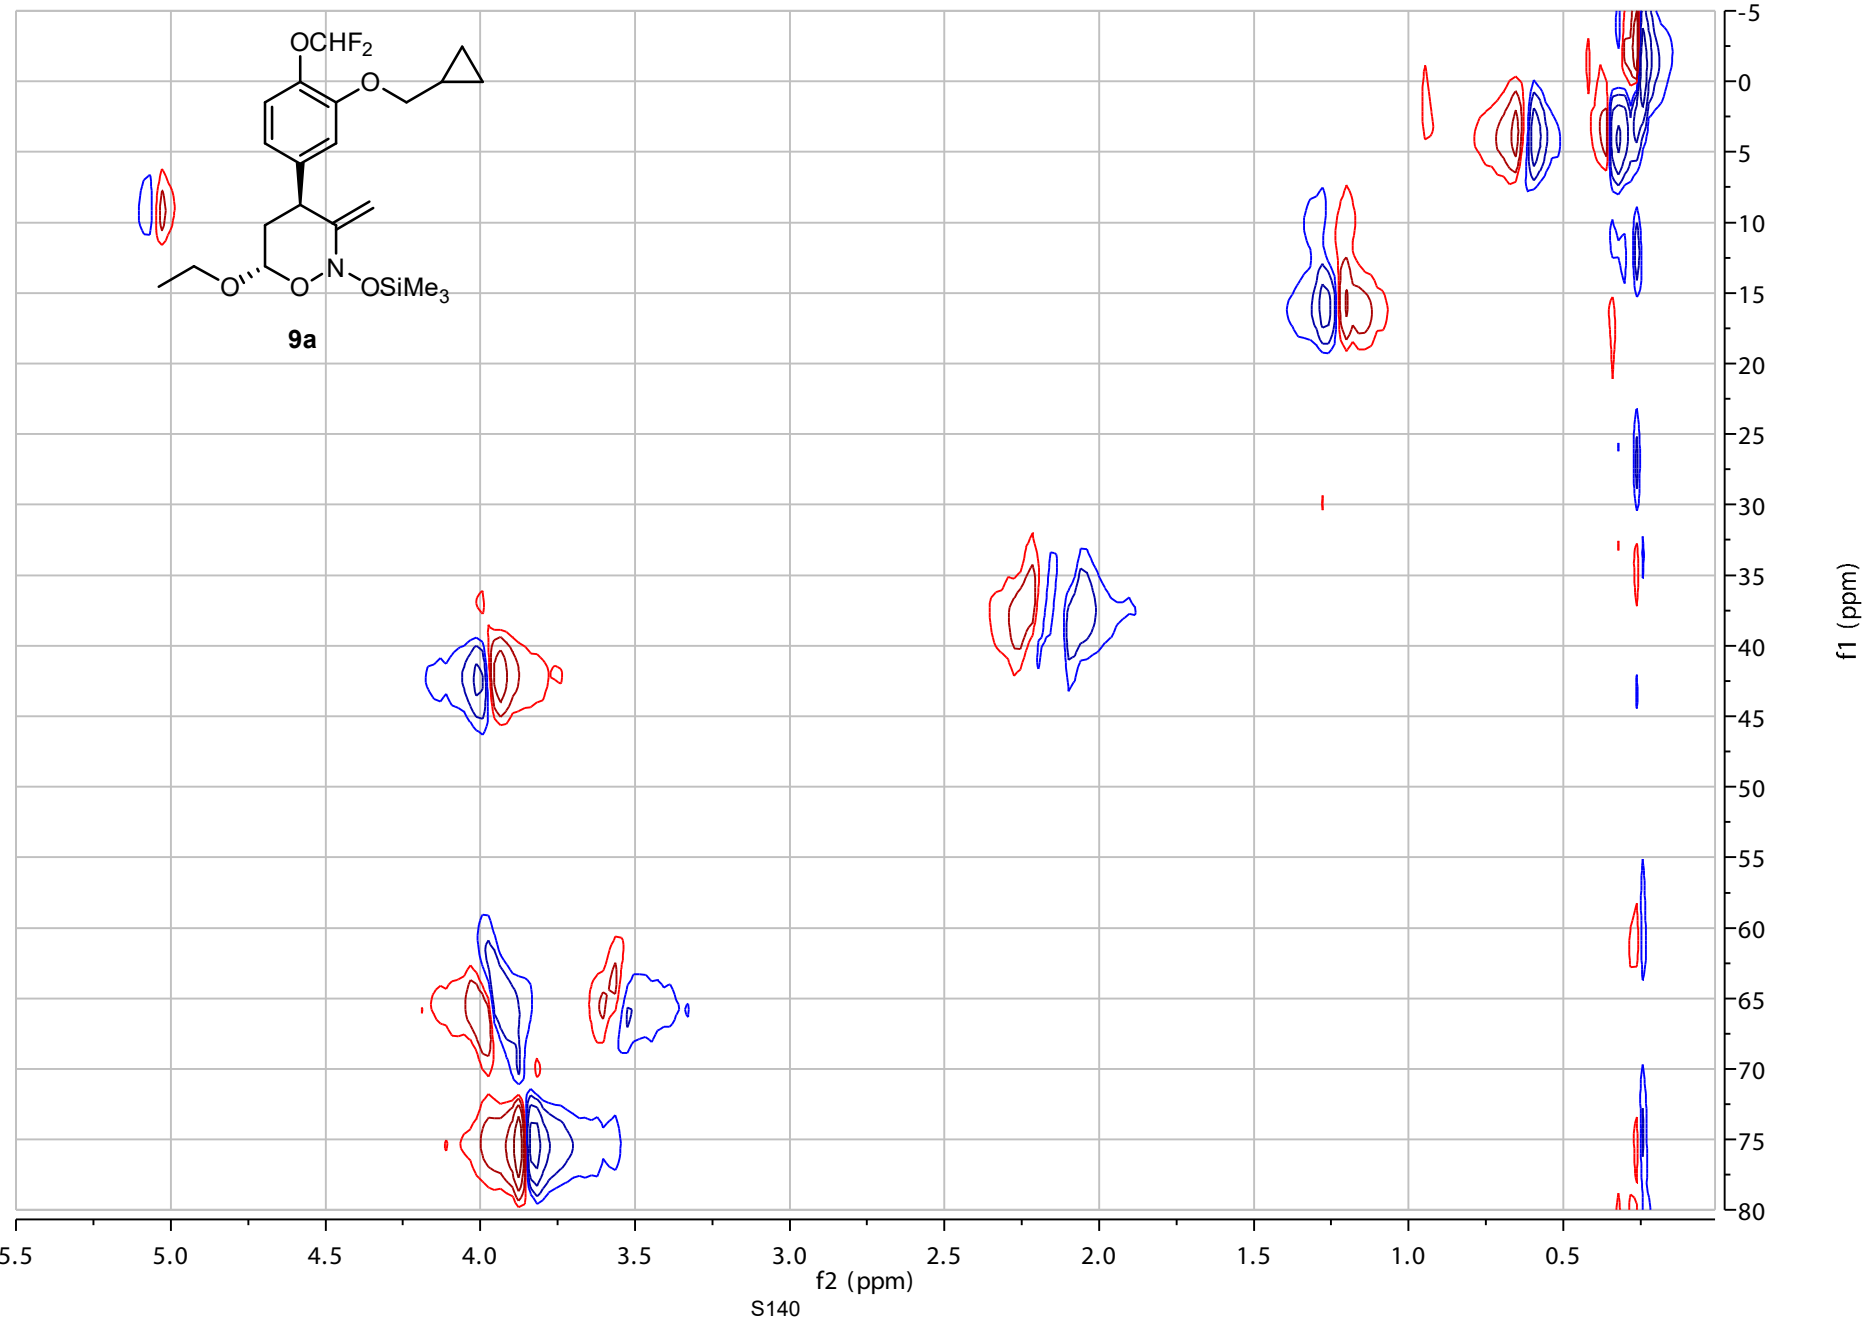

<sup>1</sup>H NMR (300 MHz, CDCl<sub>3</sub>)

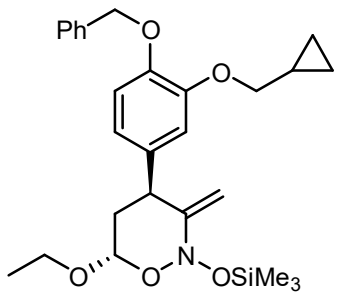

**9b**

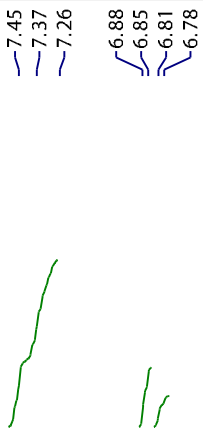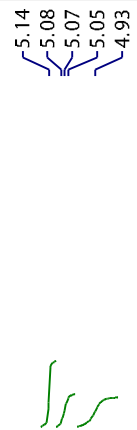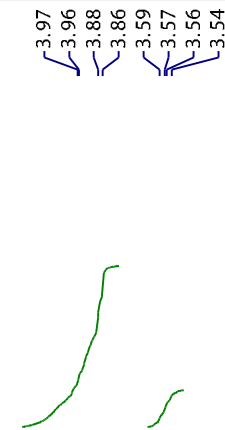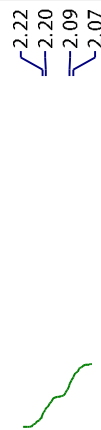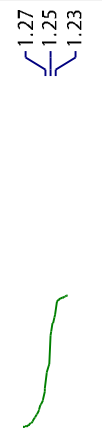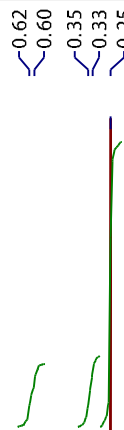

7.45  
7.37  
7.26  
6.88  
6.85  
6.81  
6.78

5.14  
5.08  
5.07  
5.05  
4.93

3.97  
3.96  
3.88  
3.86  
3.59  
3.57  
3.56  
3.54

2.22  
2.20  
2.09  
2.07

1.27  
1.25  
1.23

0.62  
0.60  
0.35  
0.33  
0.25

5.33  
1.90  
0.99

2.10  
1.04  
0.94

5.14  
1.18

2.00

4.19

2.01  
2.28  
9.09

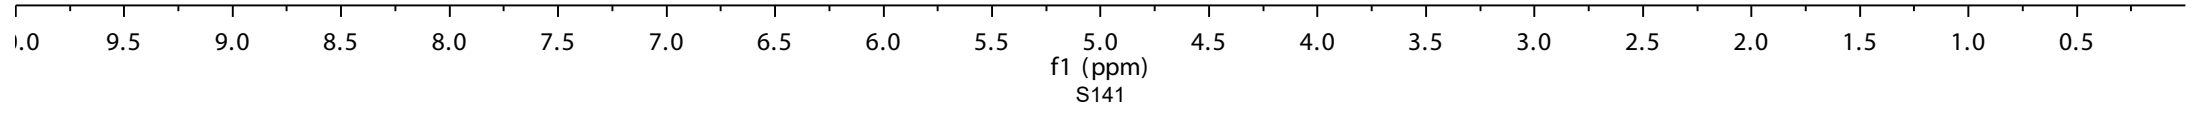

<sup>13</sup>C NMR (75 MHz, CDCl<sub>3</sub>)



**9b**

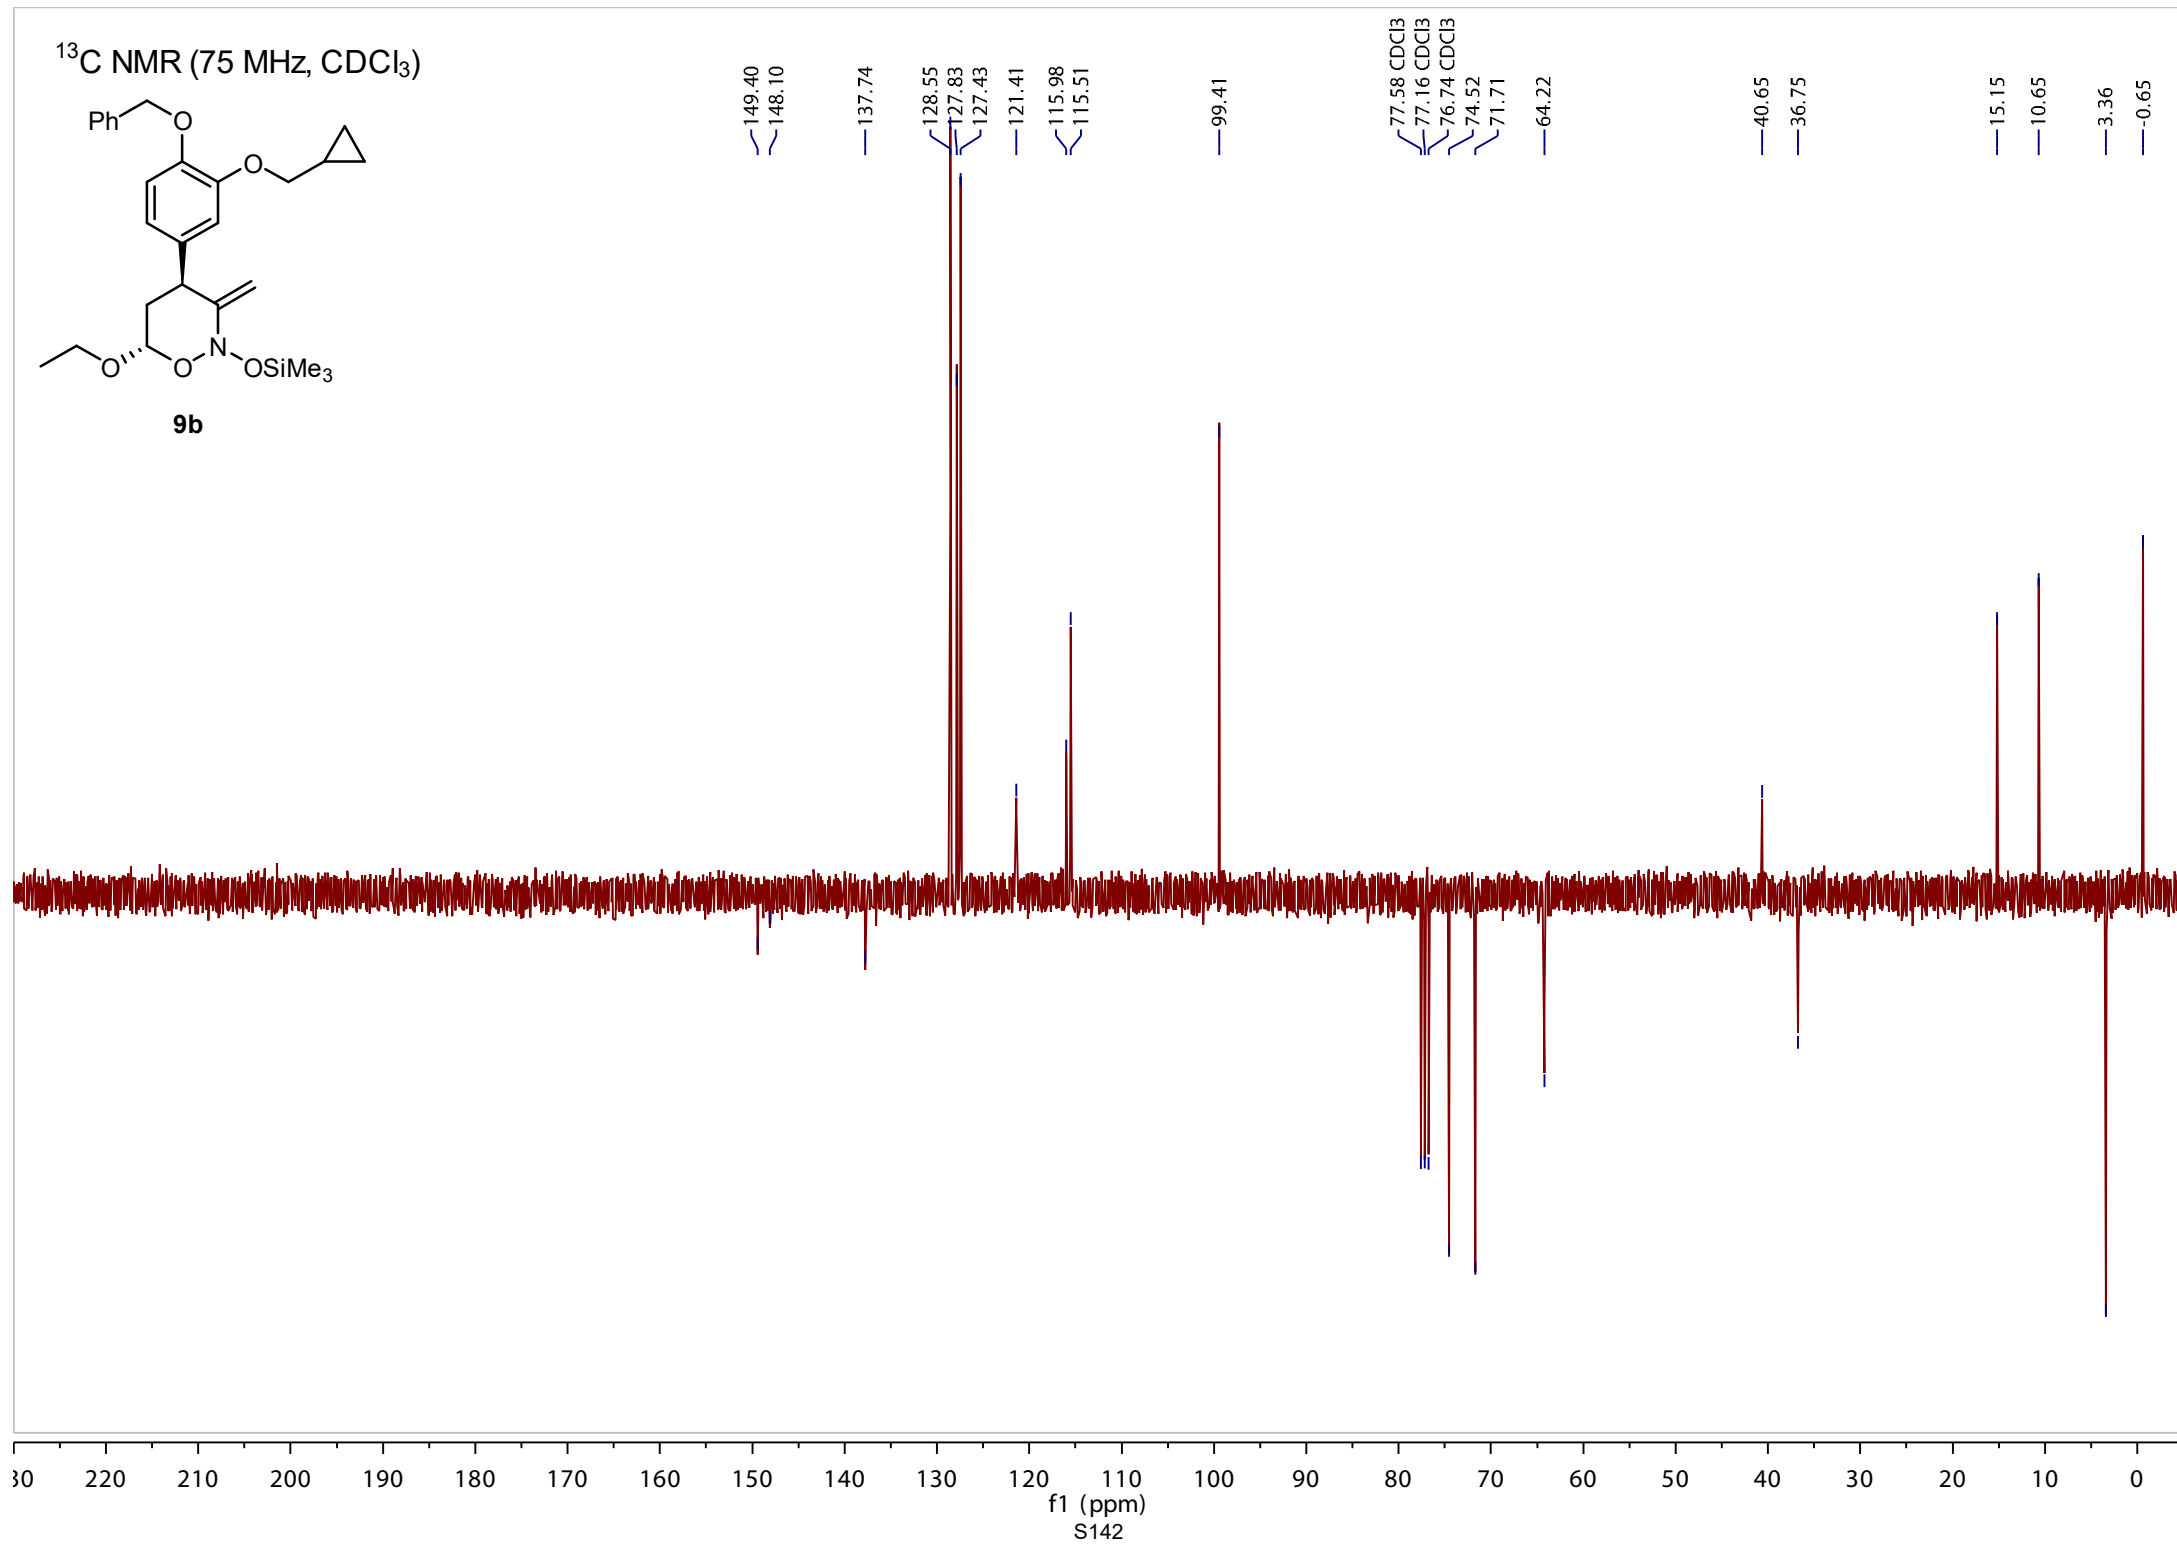

<sup>1</sup>H NMR (300 MHz, CDCl<sub>3</sub>)

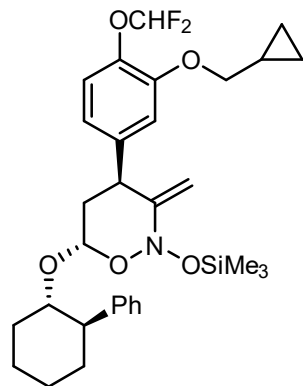

9c

7.30  
7.29  
7.26  
7.21  
7.19  
7.09  
7.06  
6.85  
6.70  
6.68  
6.60  
6.35

5.38

4.77

4.06

3.84

3.81

3.51

2.66

2.63

2.58

2.37

2.33

2.06

1.89

1.79

1.56

1.37

1.35

1.27

0.87

0.65

0.63

0.35

0.34

0.28

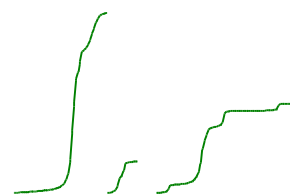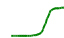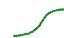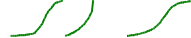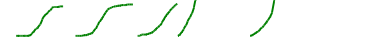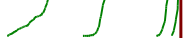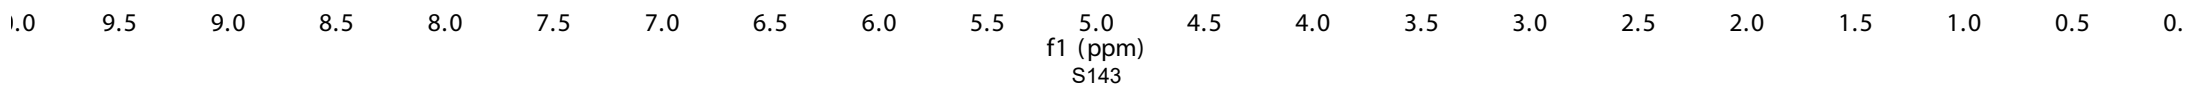

$^{13}\text{C}$  NMR (75 MHz,  $\text{CDCl}_3$ )

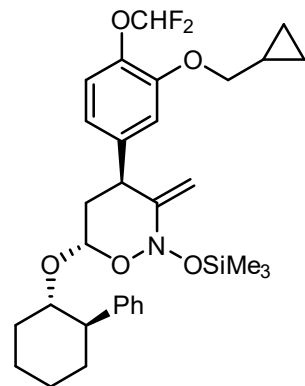

**9c**

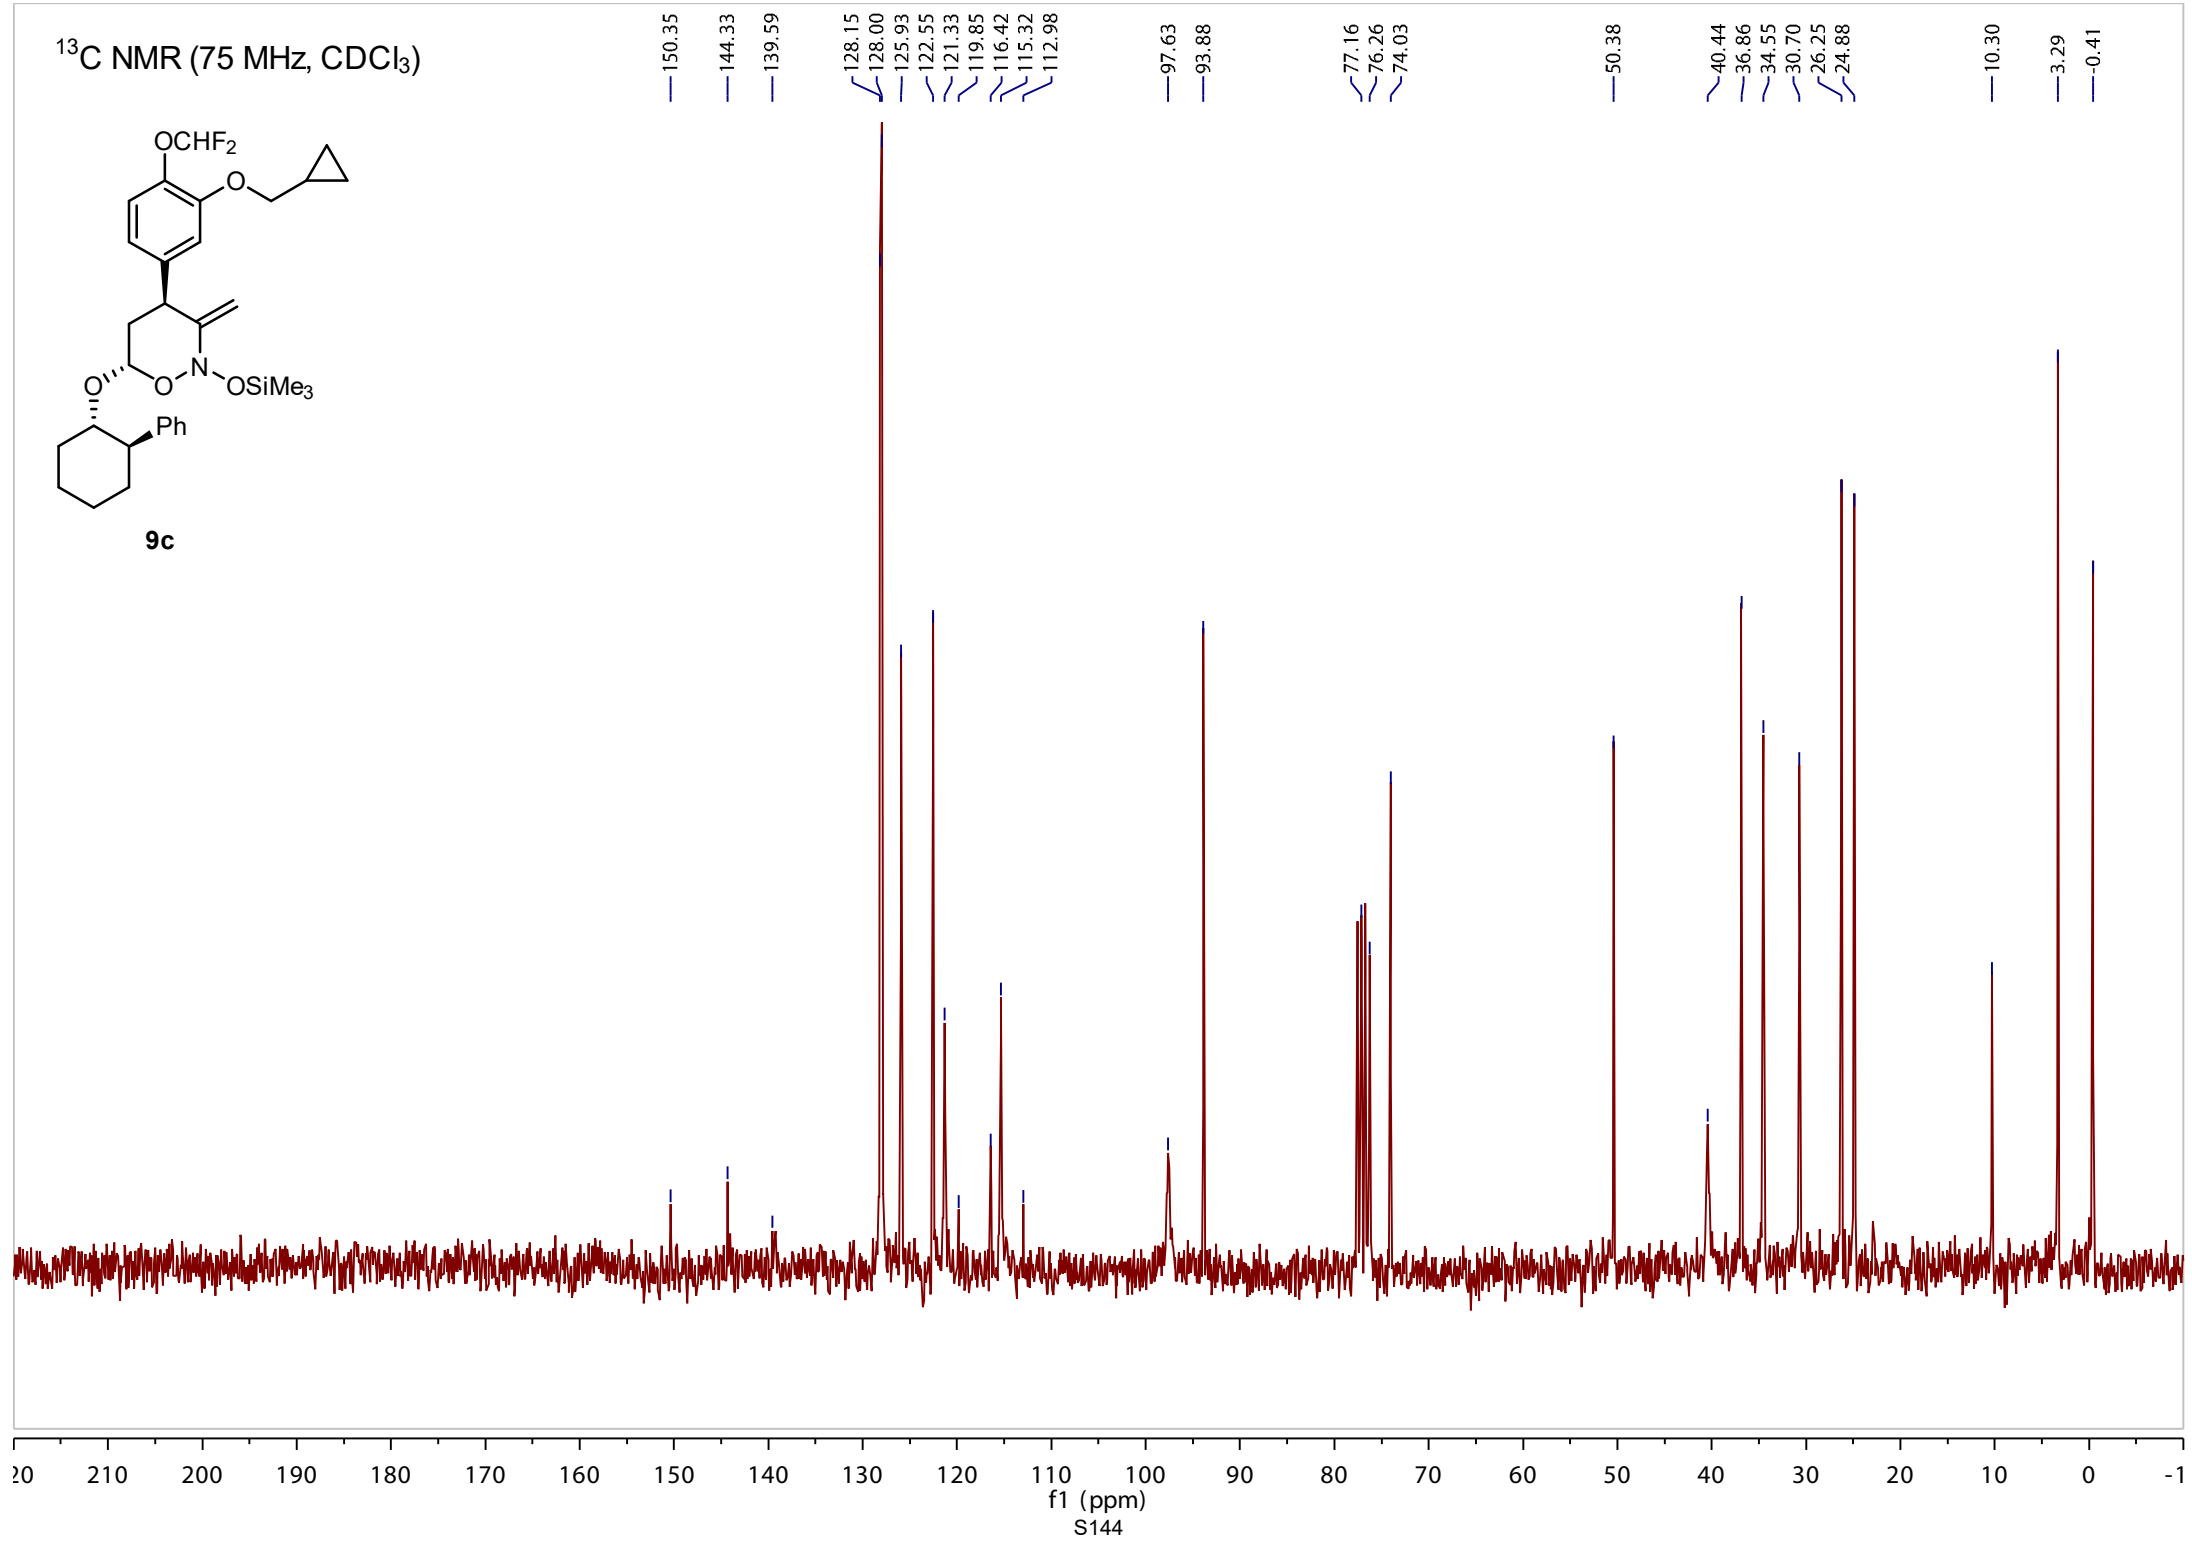



$^{19}\text{F}$  NMR (282 MHz,  $\text{CDCl}_3$ )



**9c**

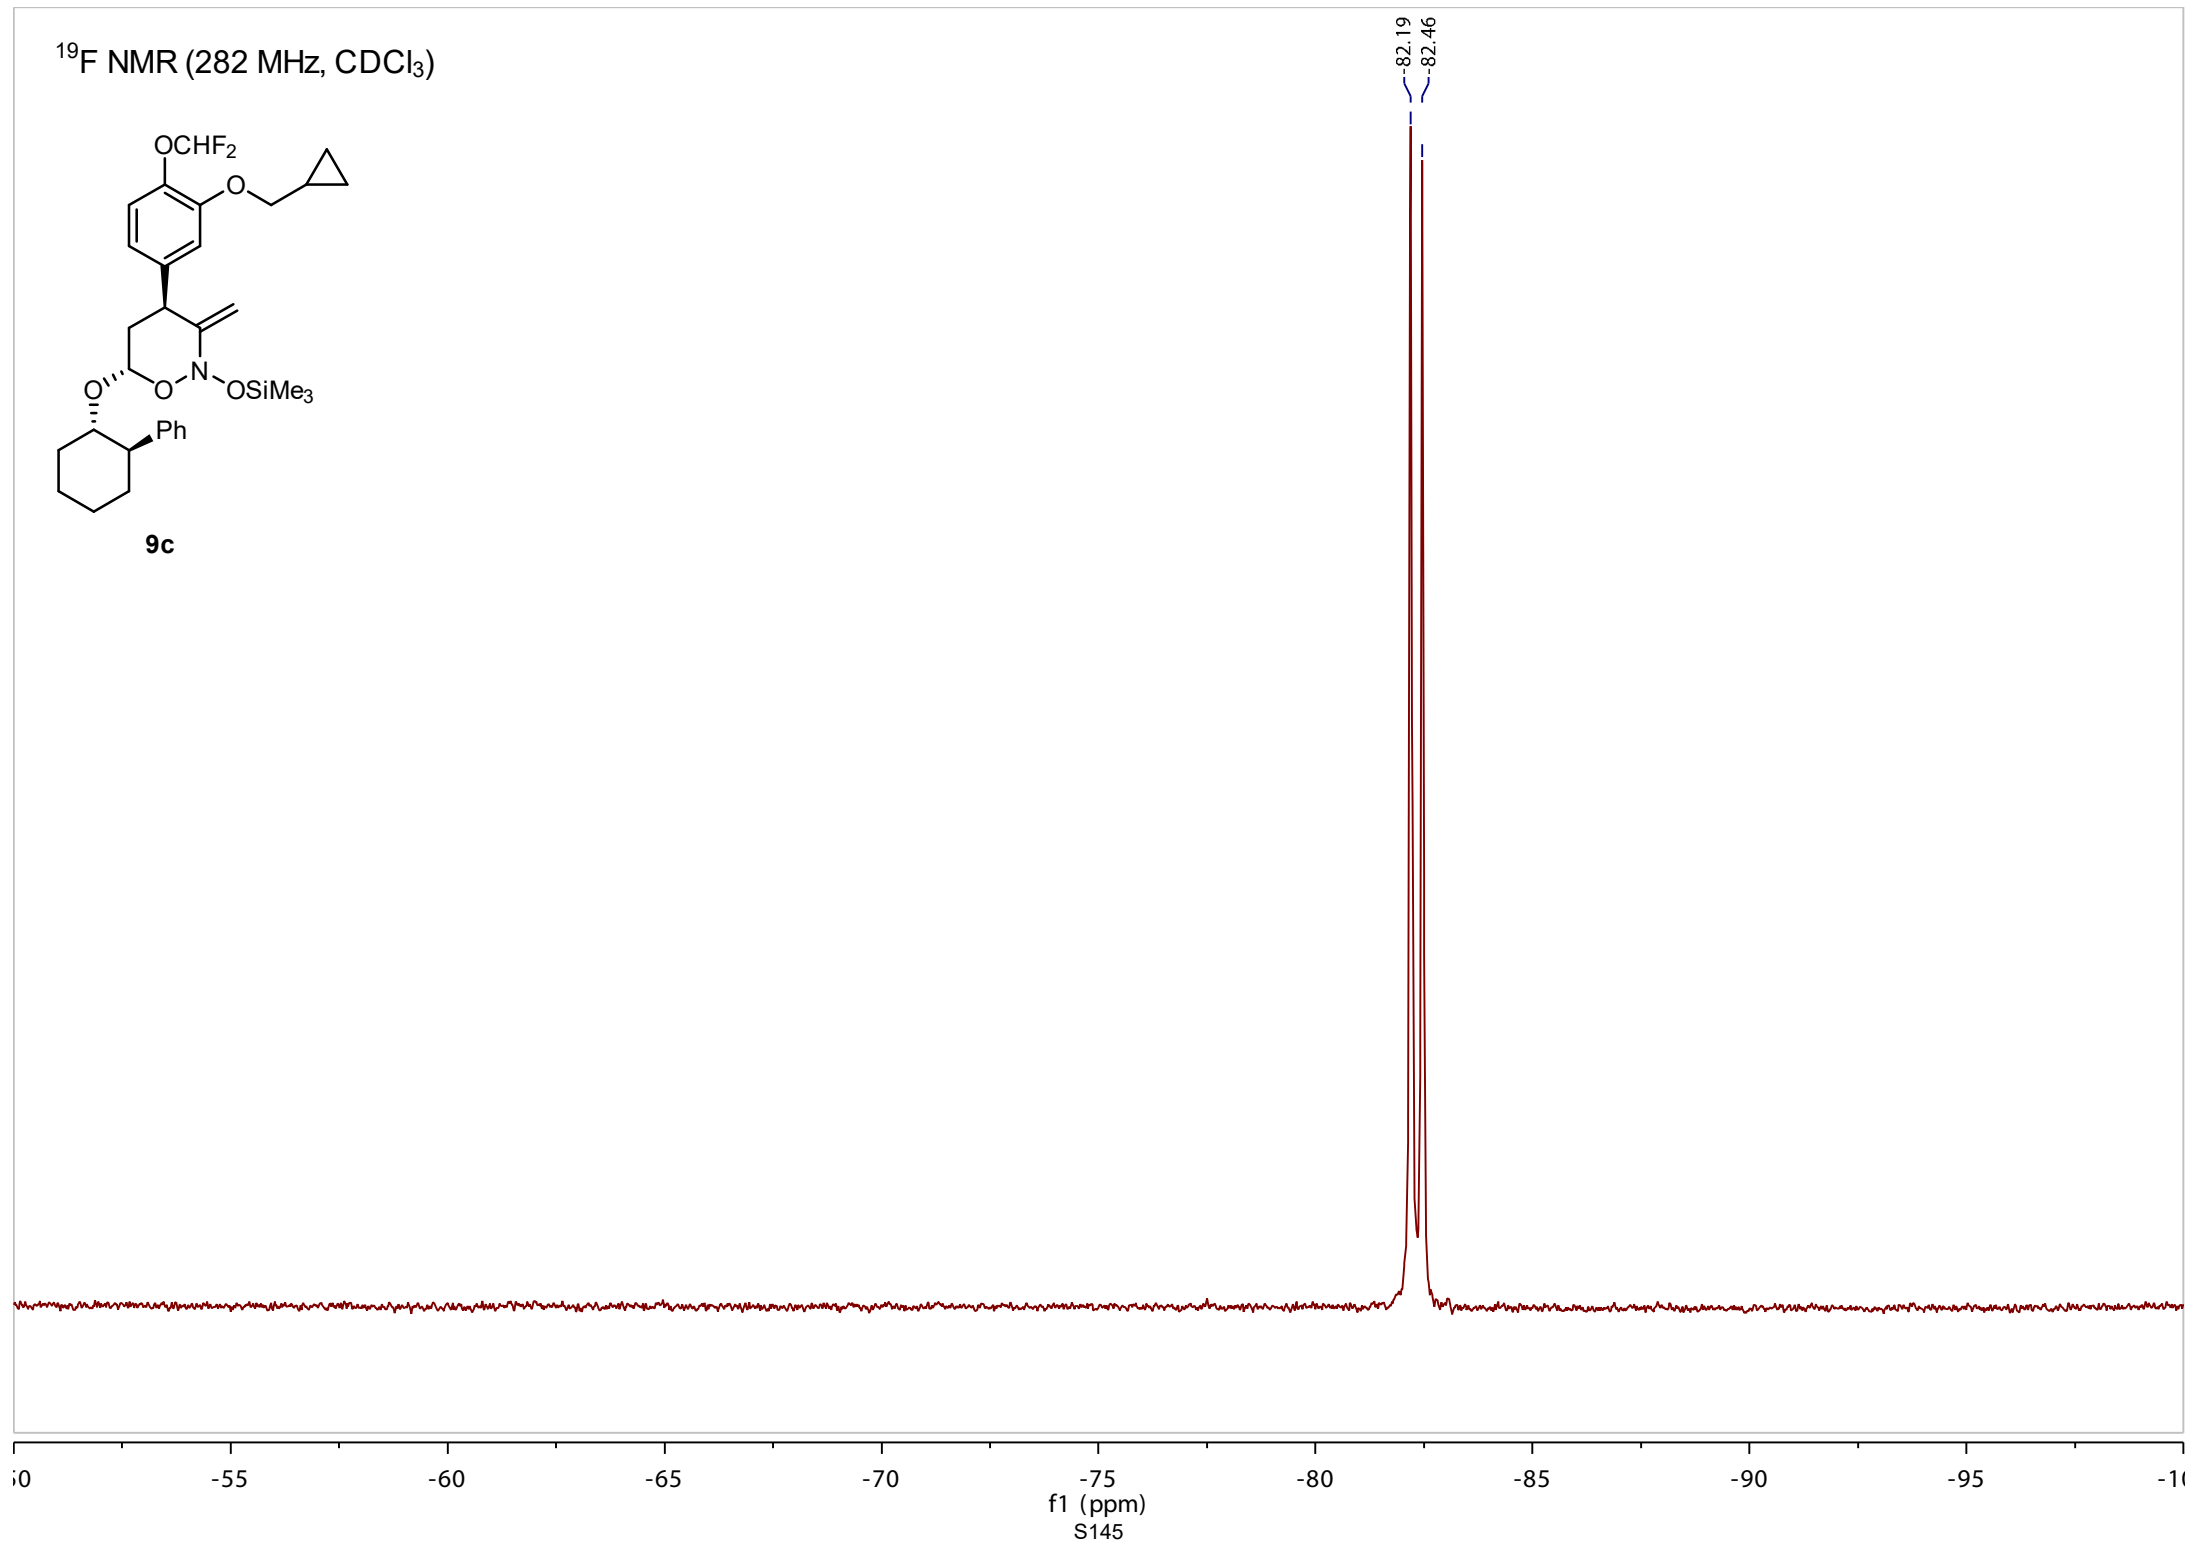

$^{29}\text{Si}$  NMR (40 MHz,  $\text{CDCl}_3$ )

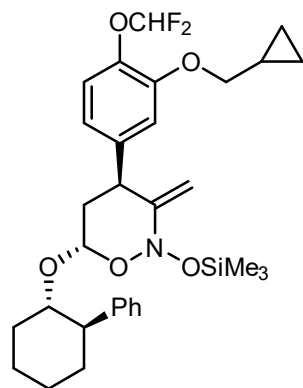

**9c**

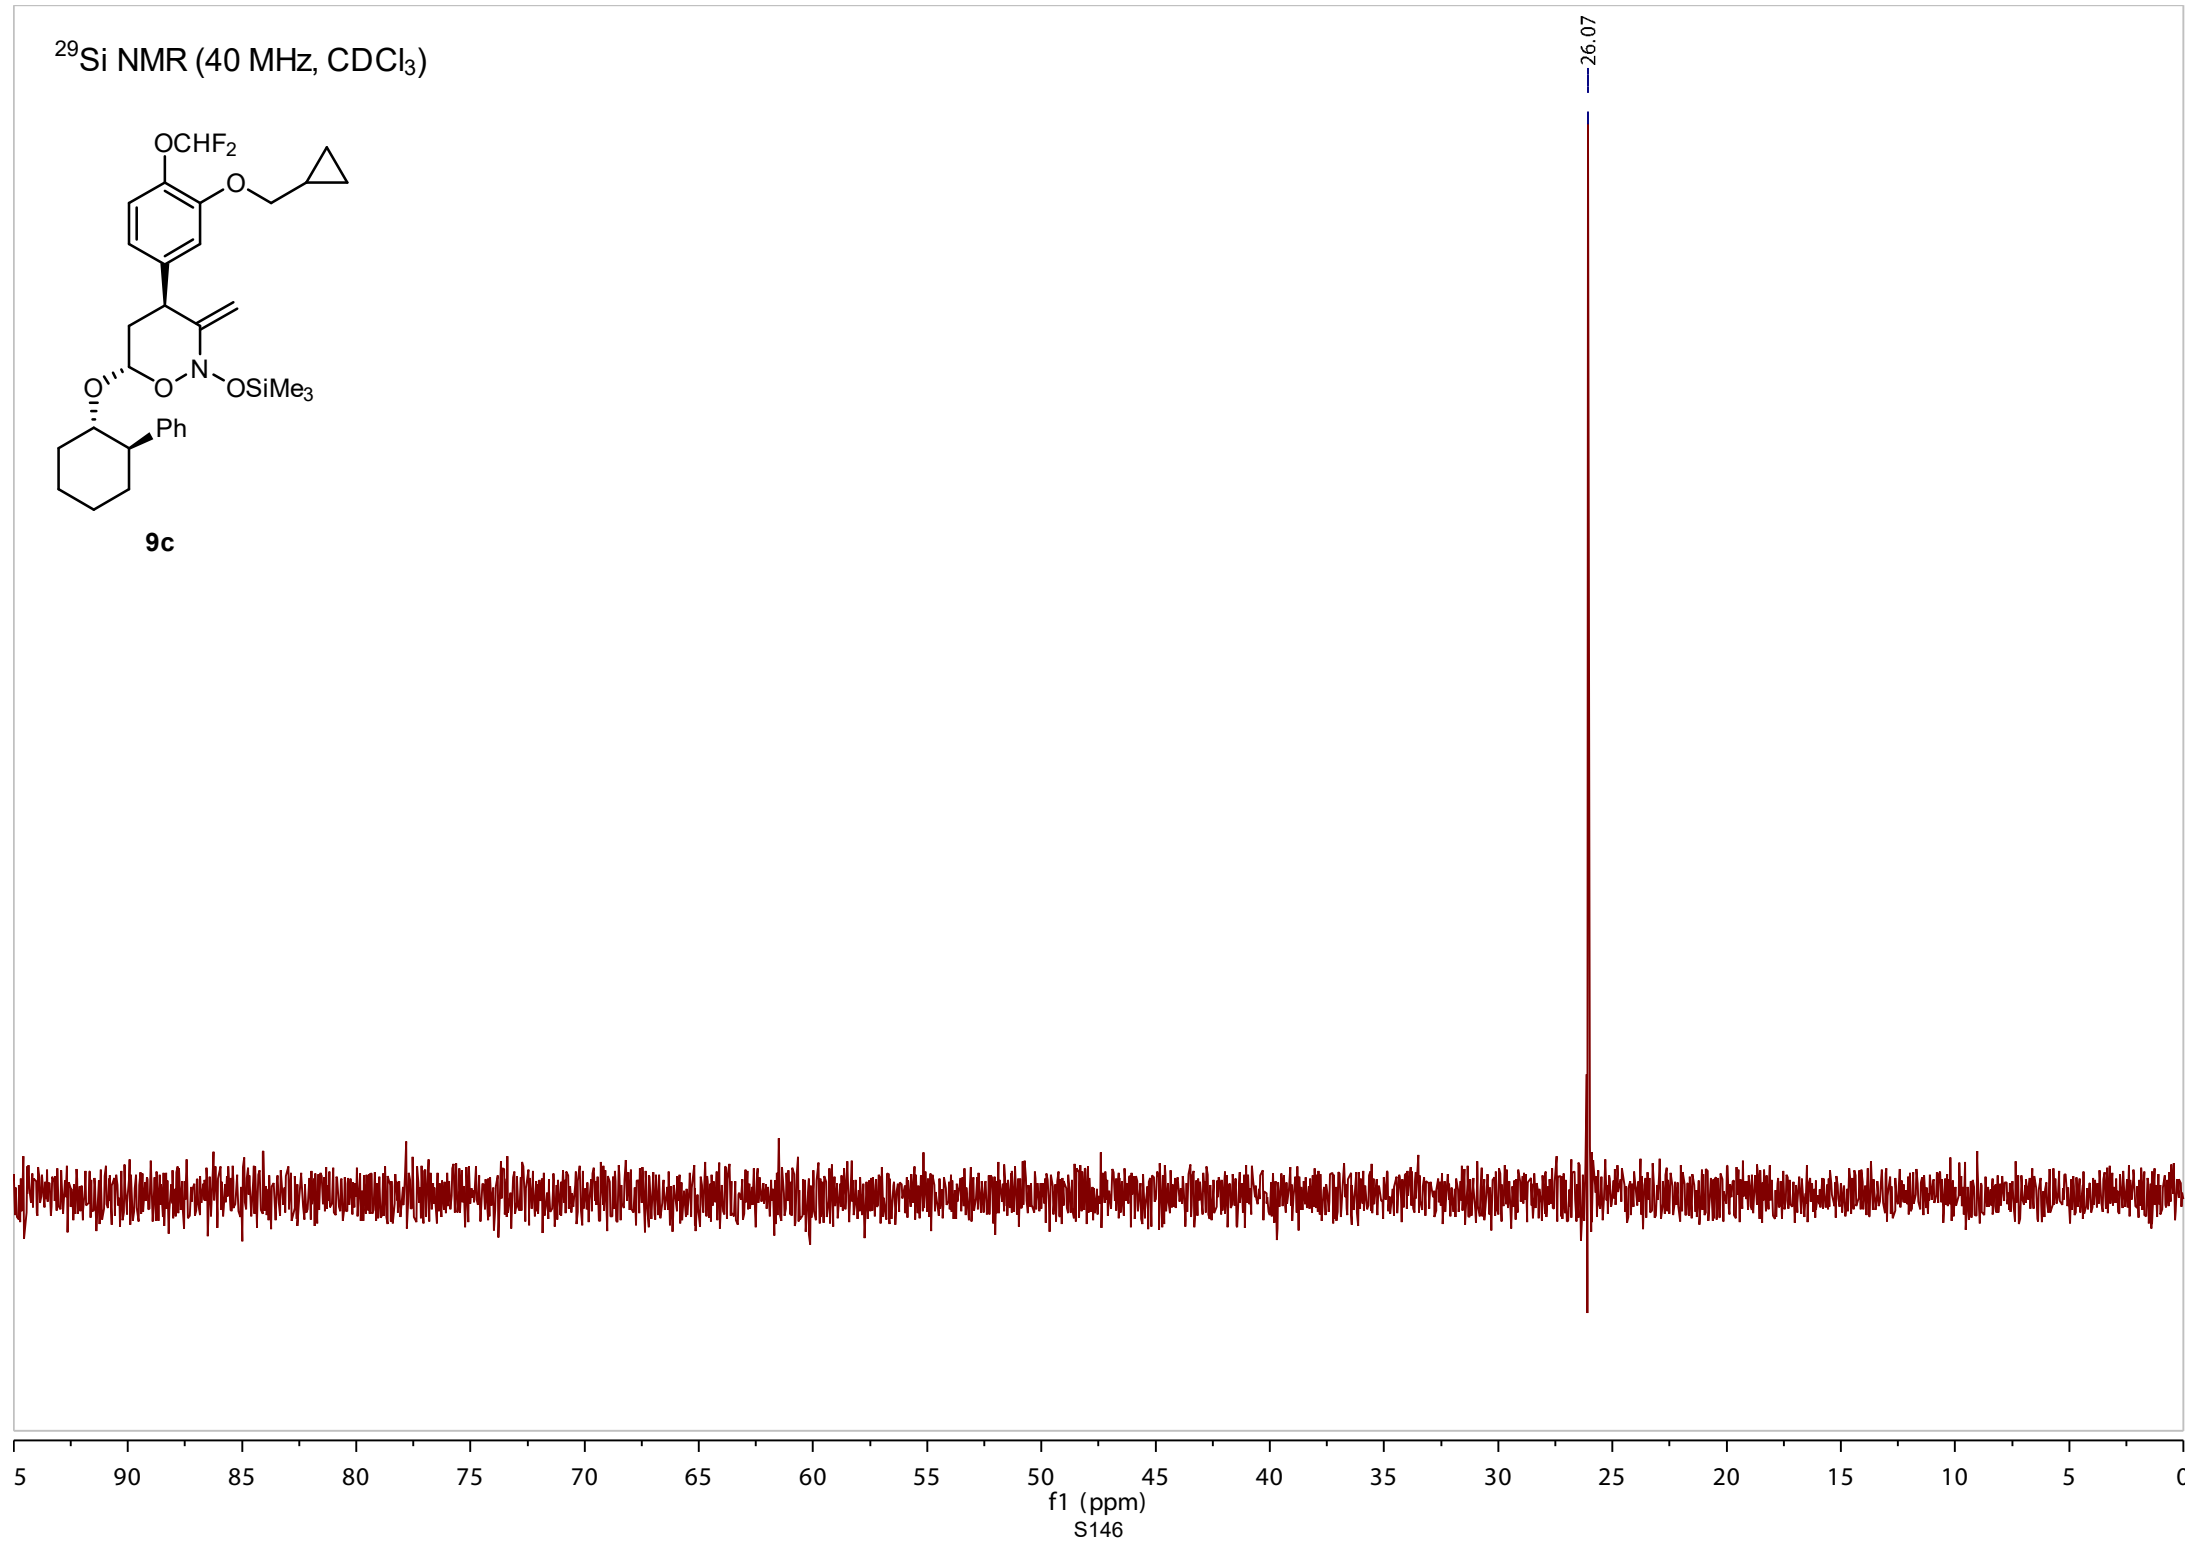

COSY NMR

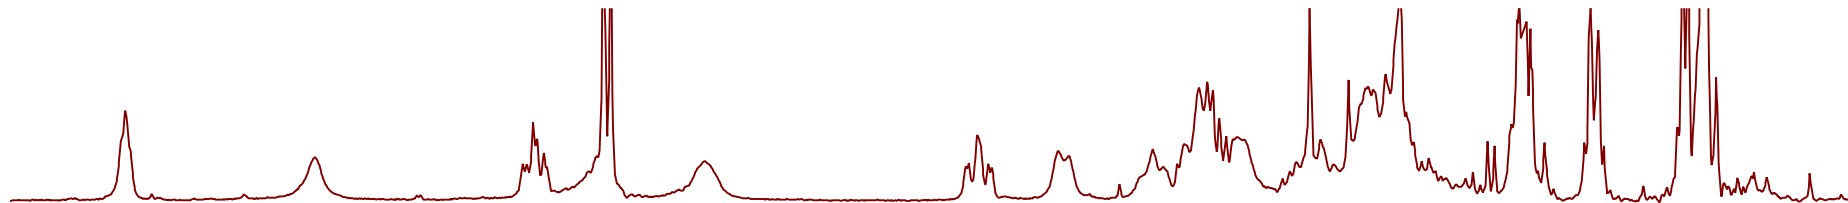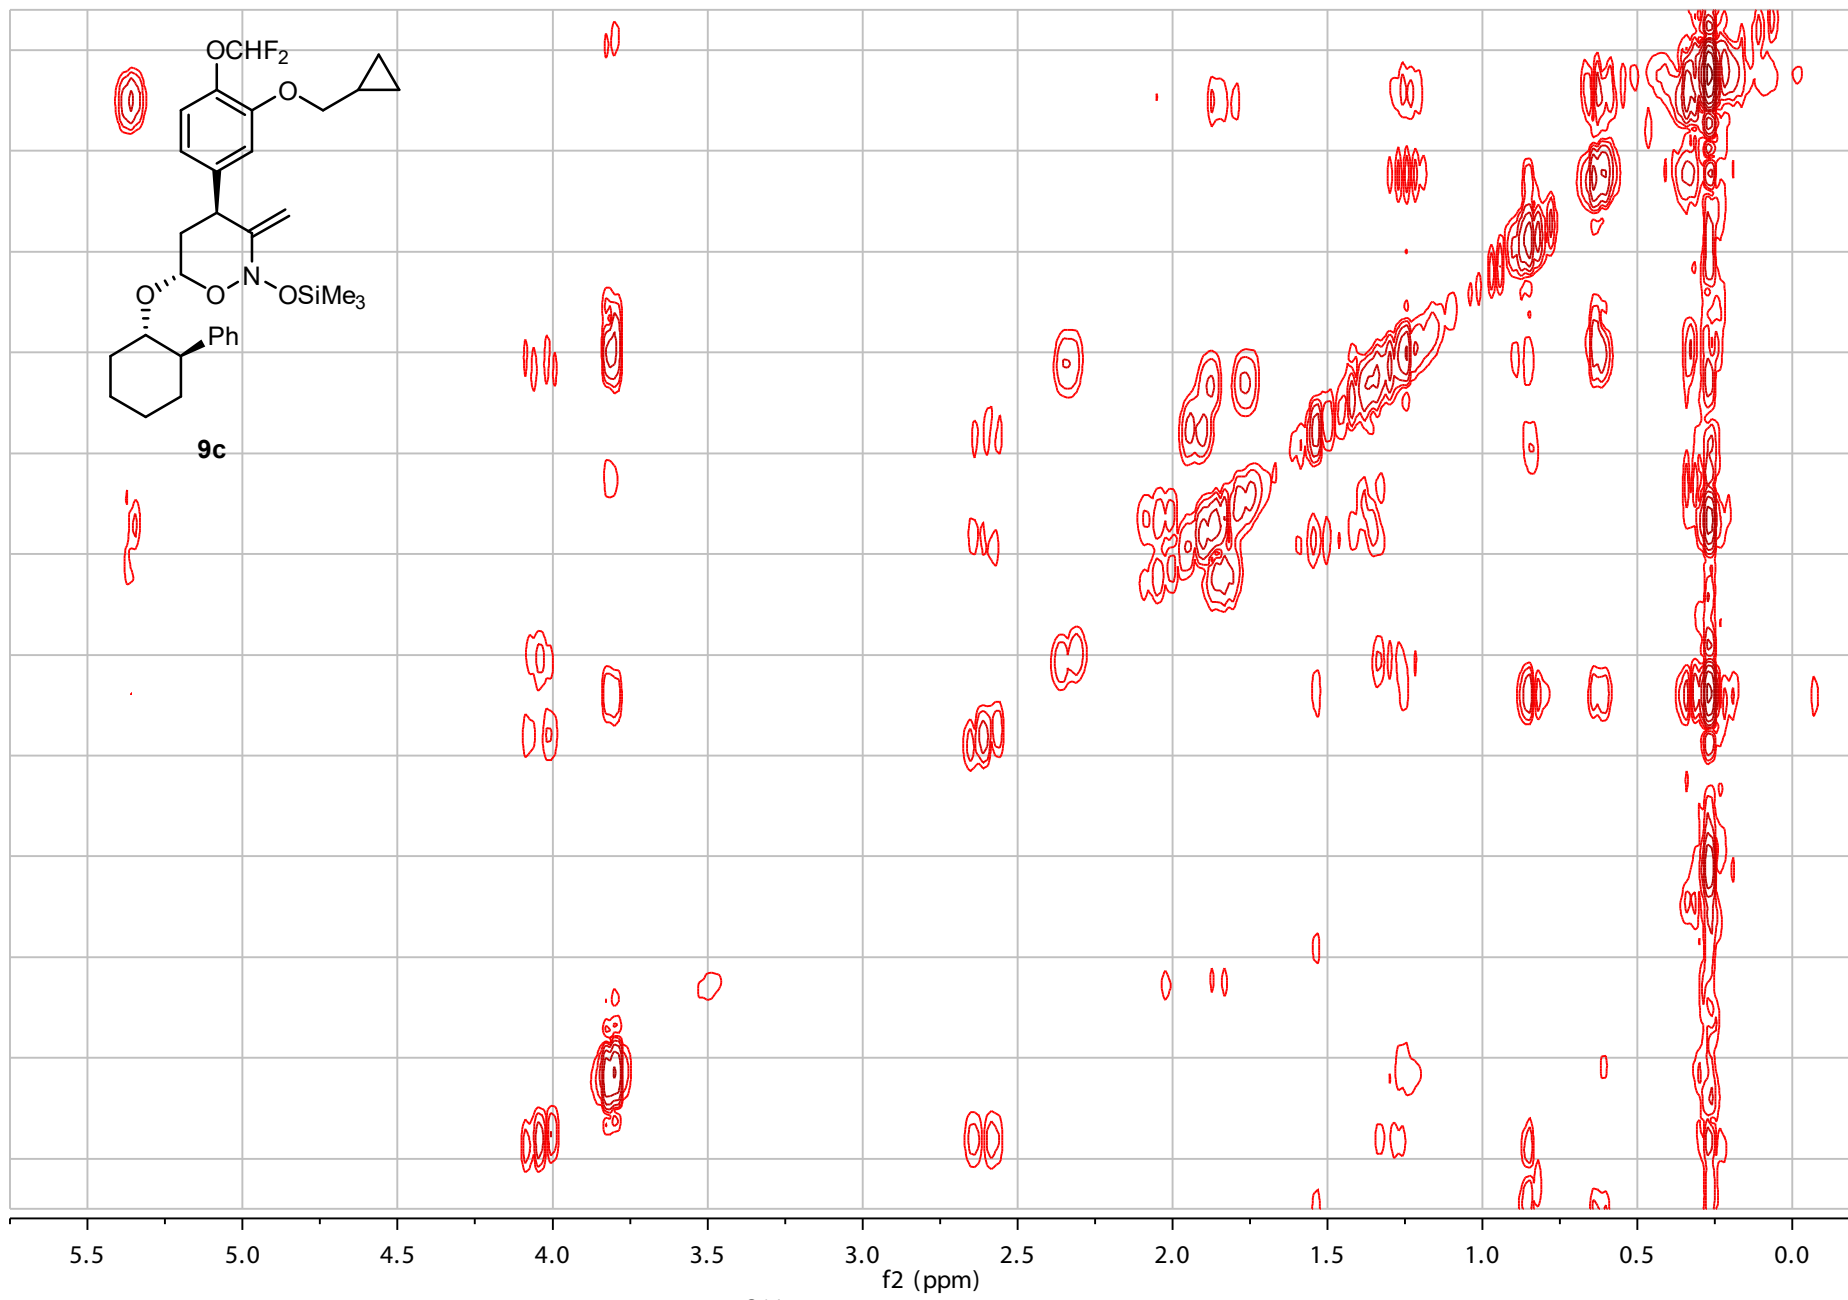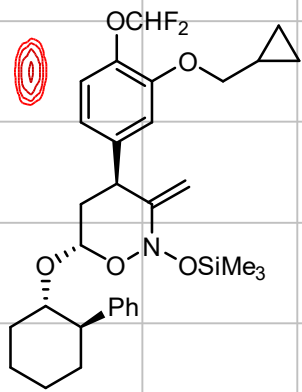

9c

# HSQC NMR

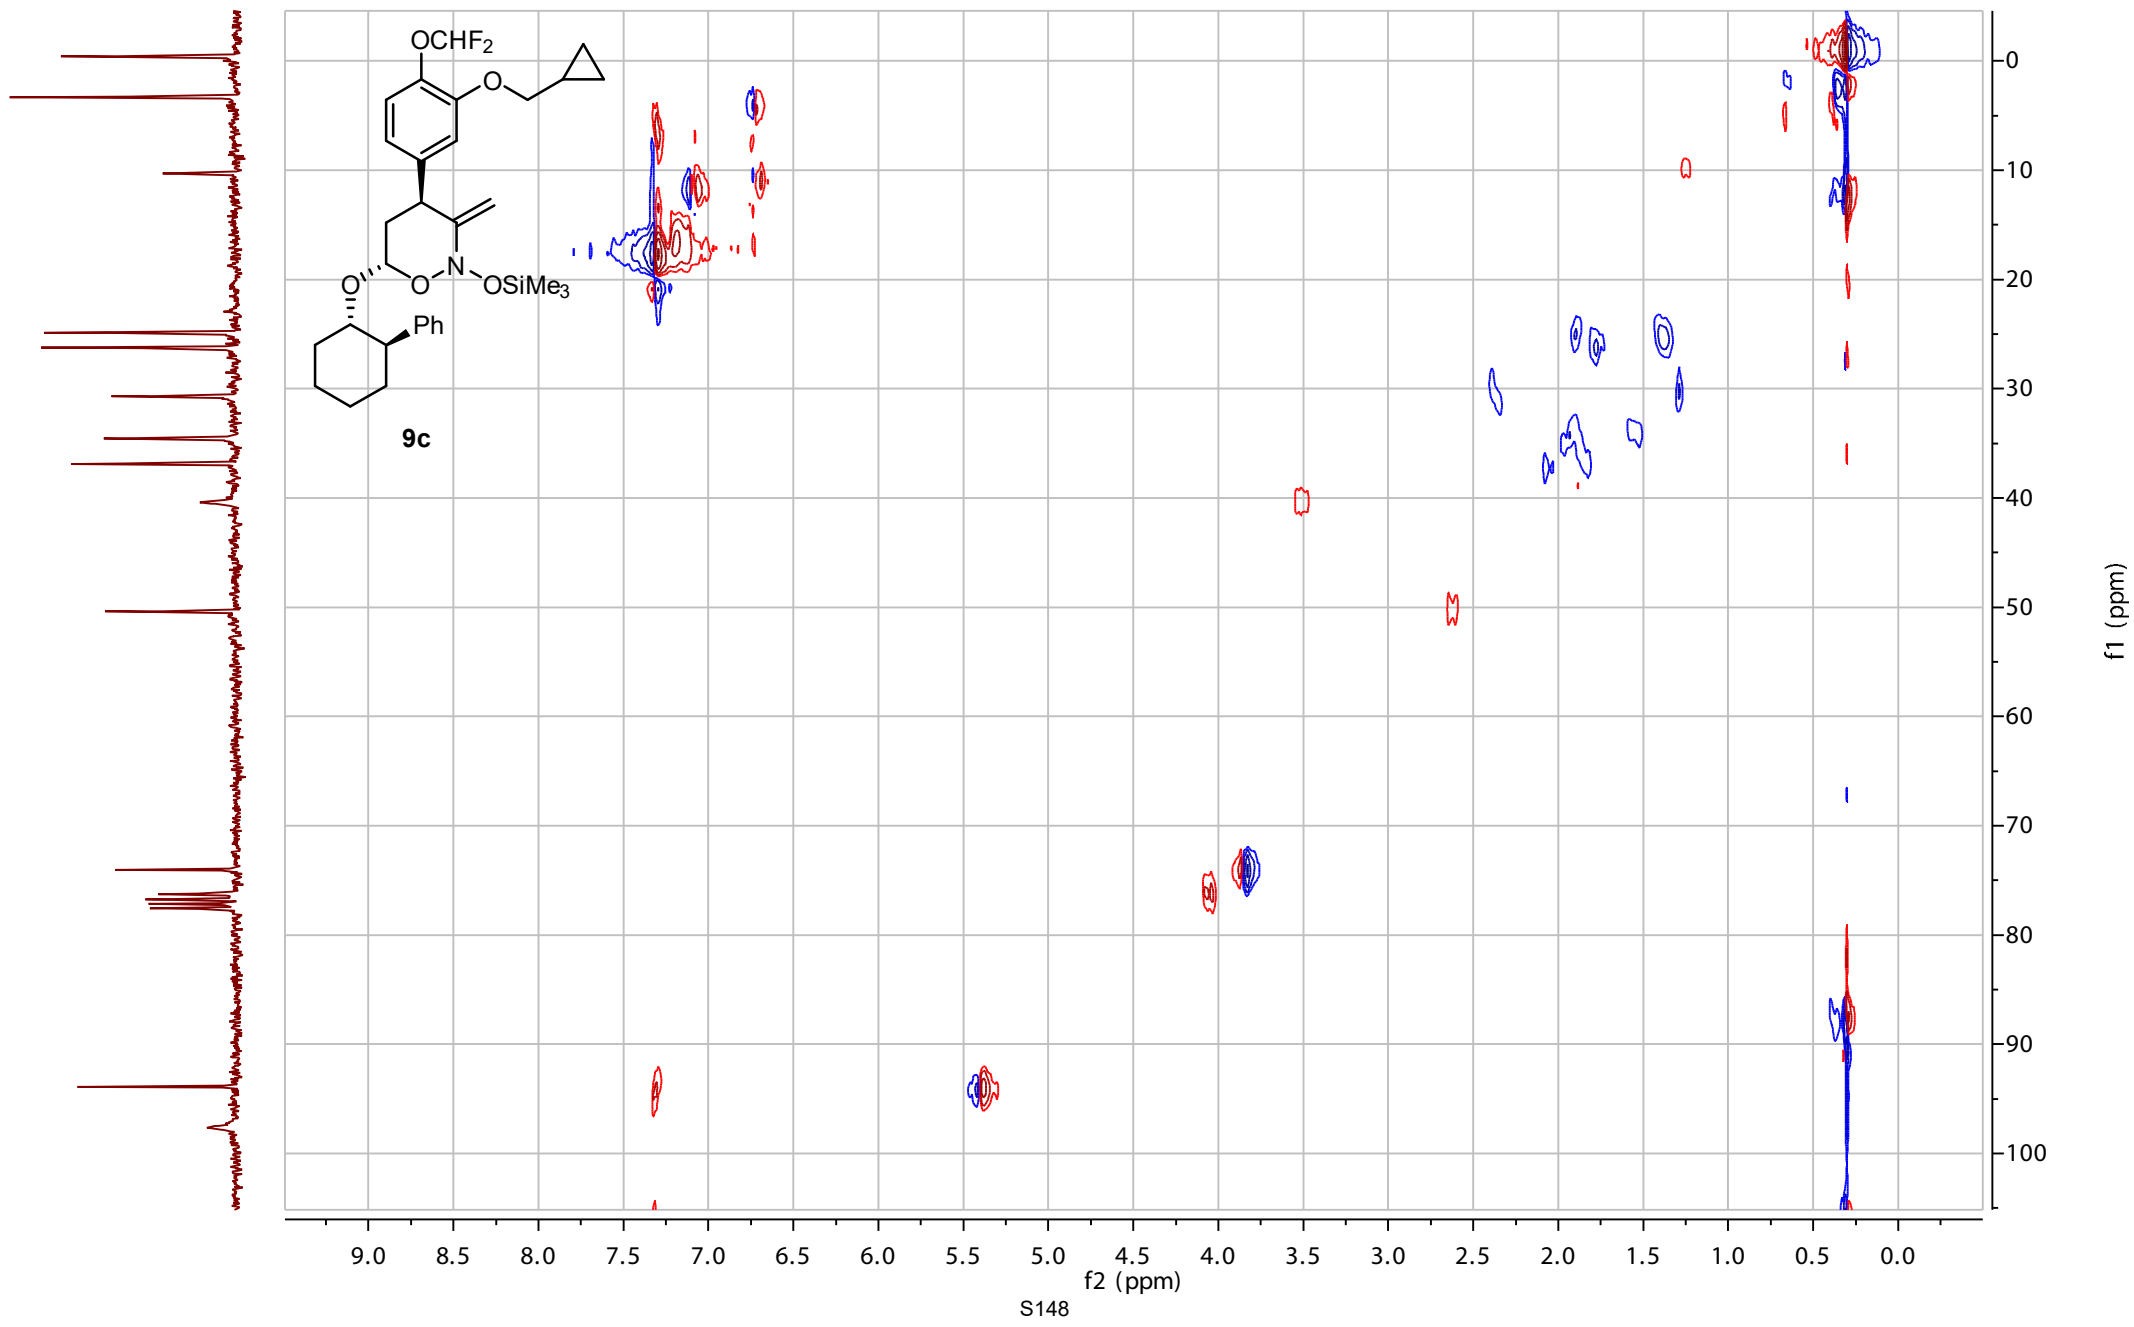

<sup>1</sup>H NMR (300 MHz, CDCl<sub>3</sub>)

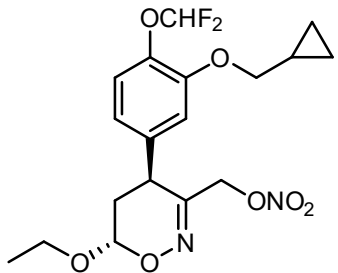

10a

7.16  
7.13  
6.86  
6.79  
6.77  
6.61  
6.36

5.19  
4.85  
4.81  
4.76  
4.71

3.87  
3.84  
3.67  
3.64

2.28  
2.12

1.25  
1.23  
1.20

0.66  
0.63  
0.36  
0.35

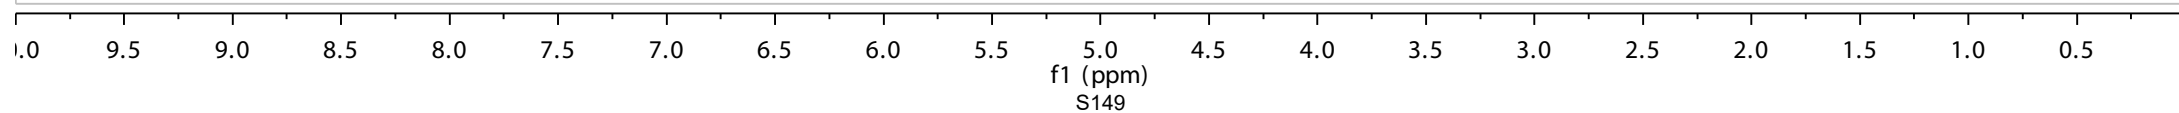

<sup>13</sup>C NMR (75 MHz, CDCl<sub>3</sub>)

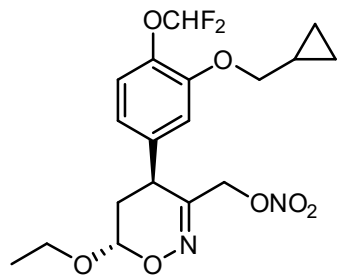

**10a**

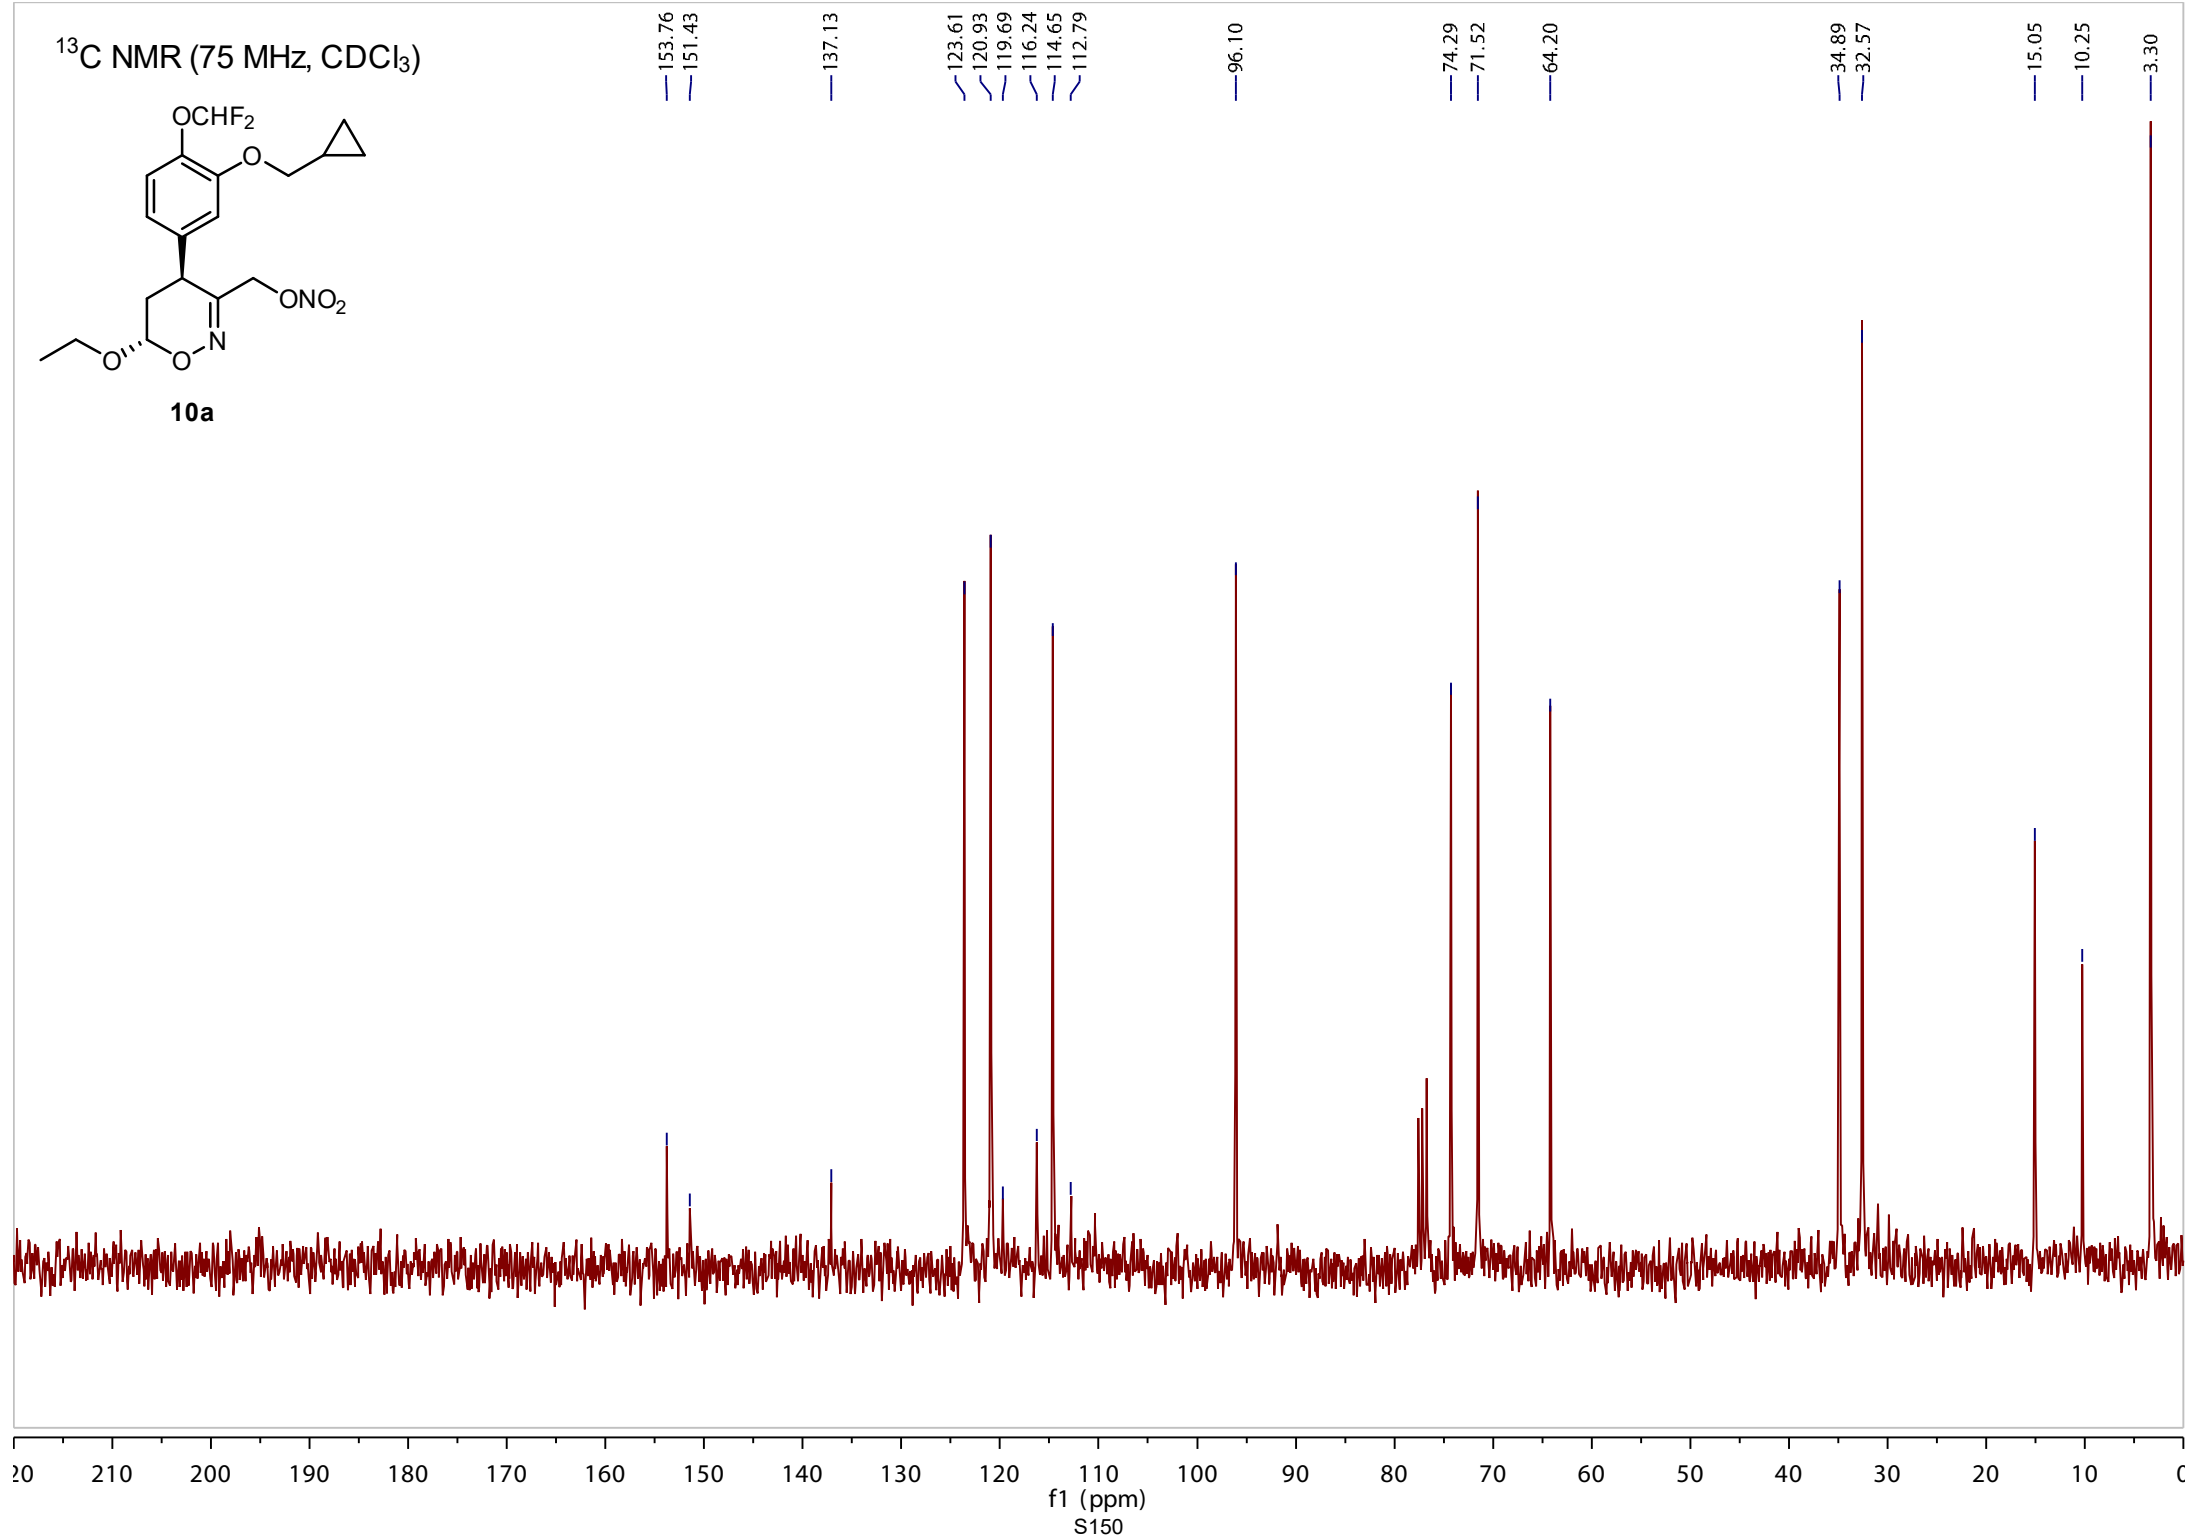

$^{19}\text{F}$  NMR (282 MHz,  $\text{CDCl}_3$ )

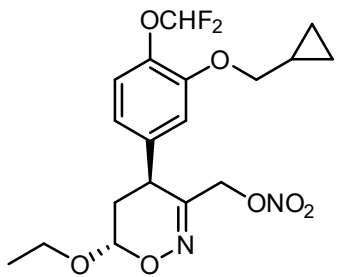

**10a**

82.39  
82.66

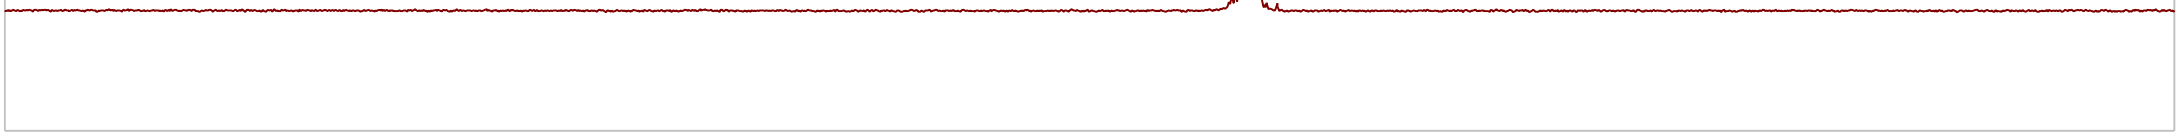

f1 (ppm)  
S151

COSY NMR

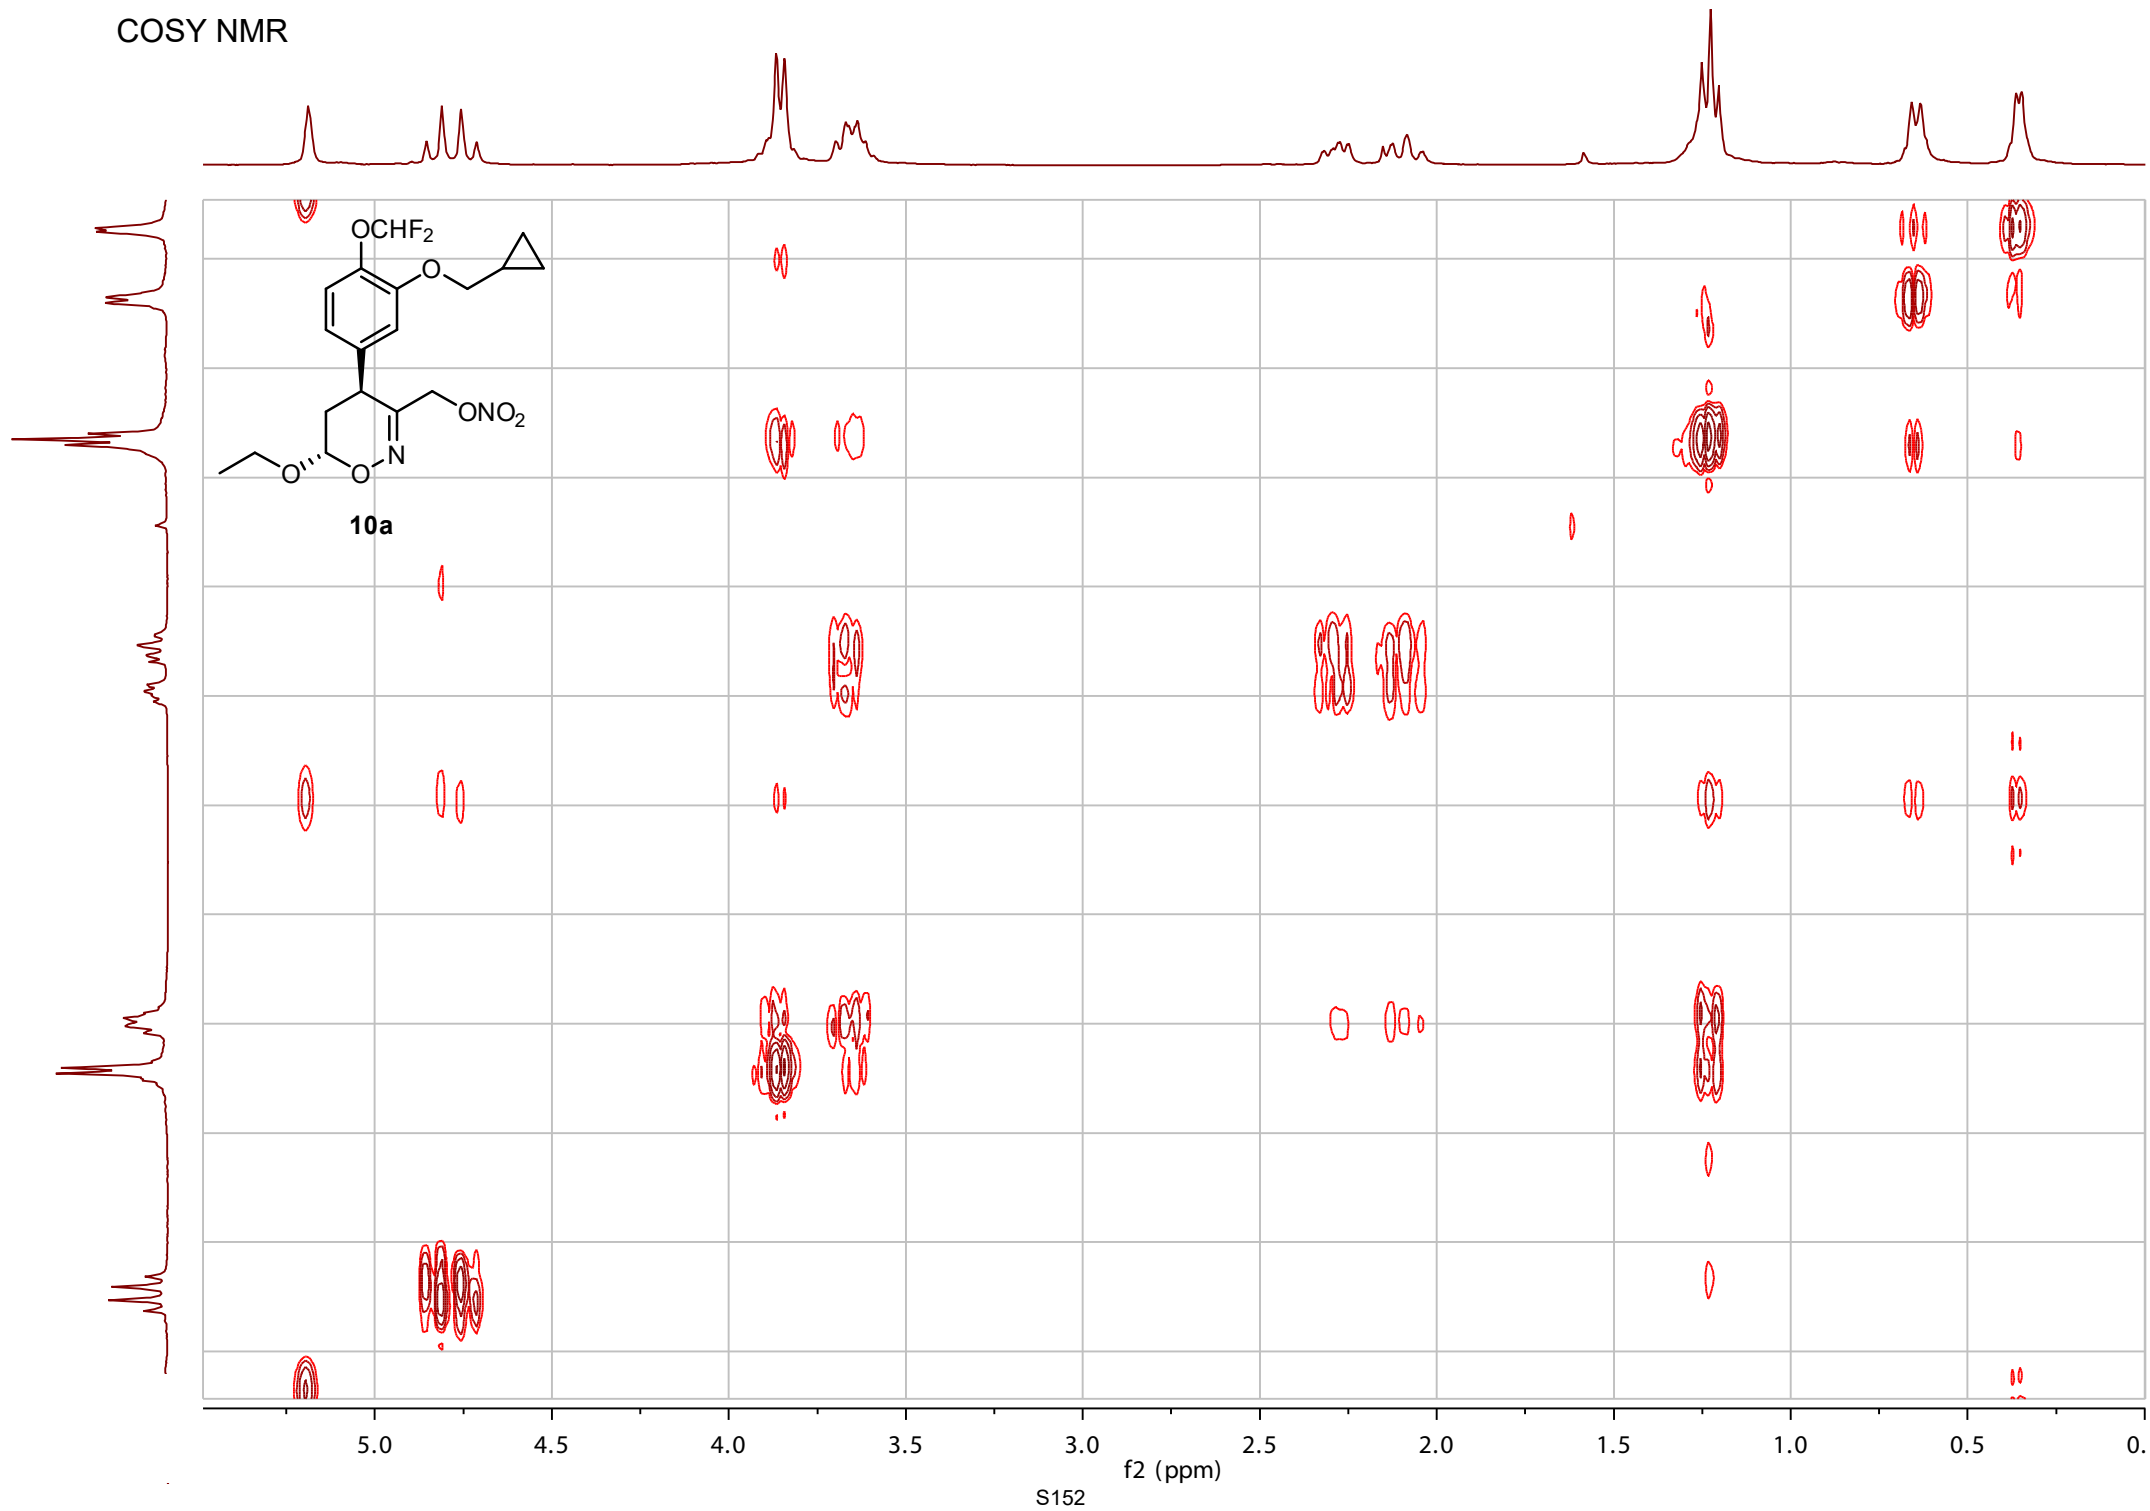



# HSQC NMR

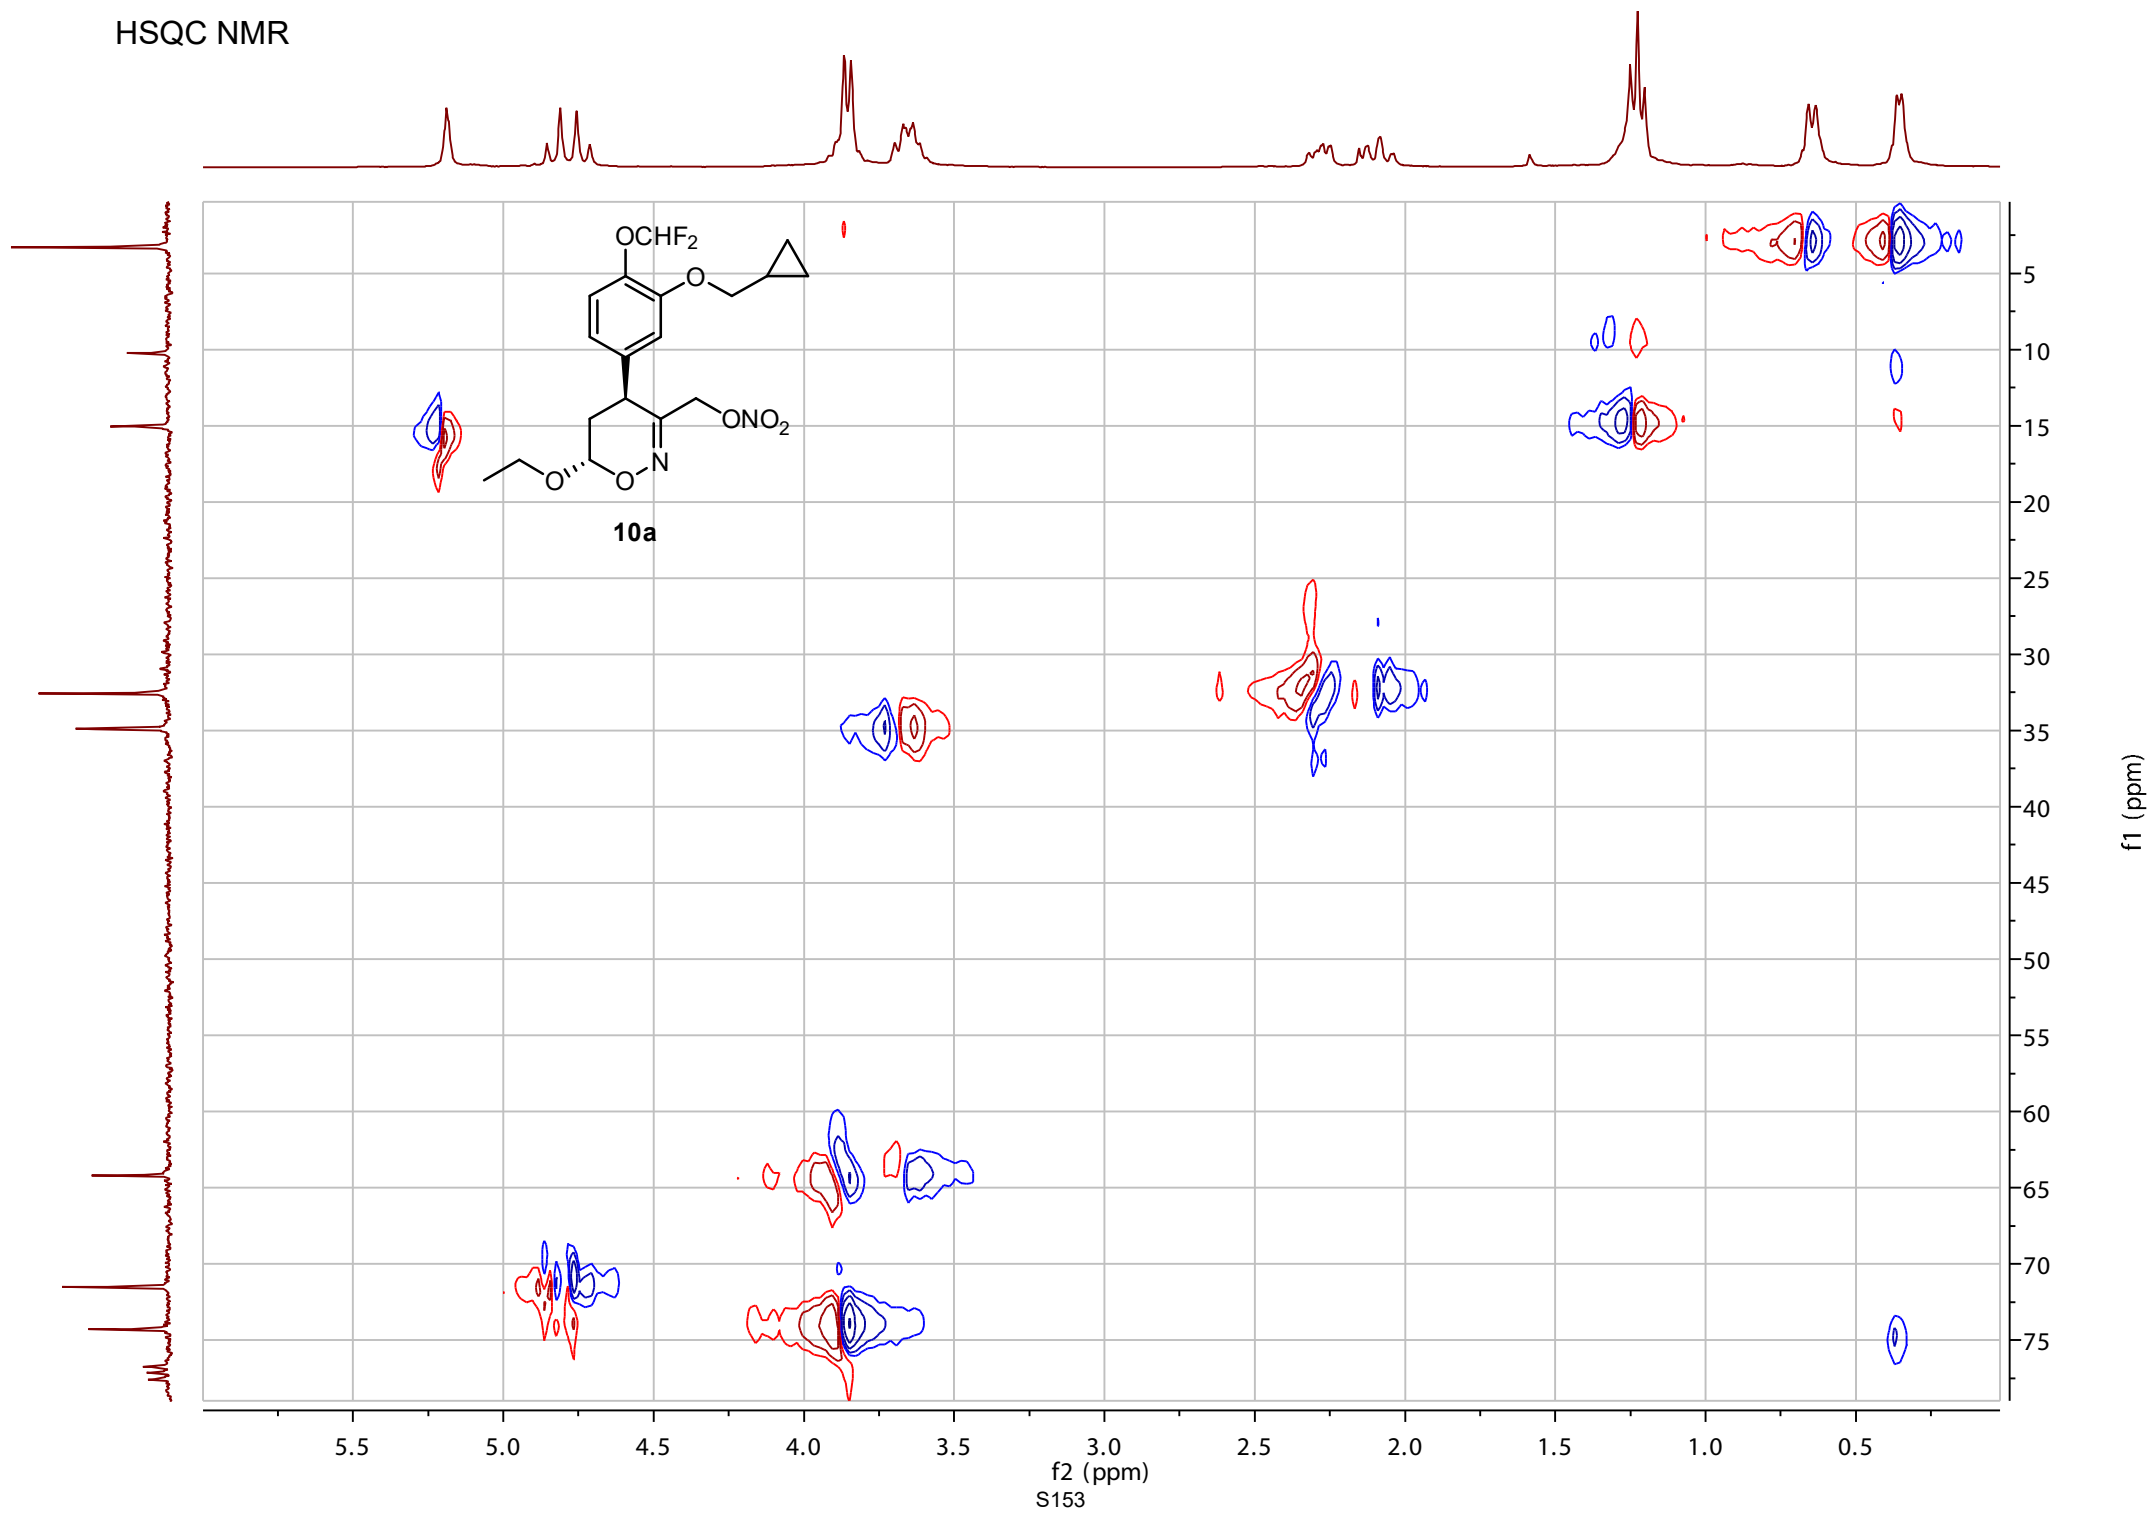

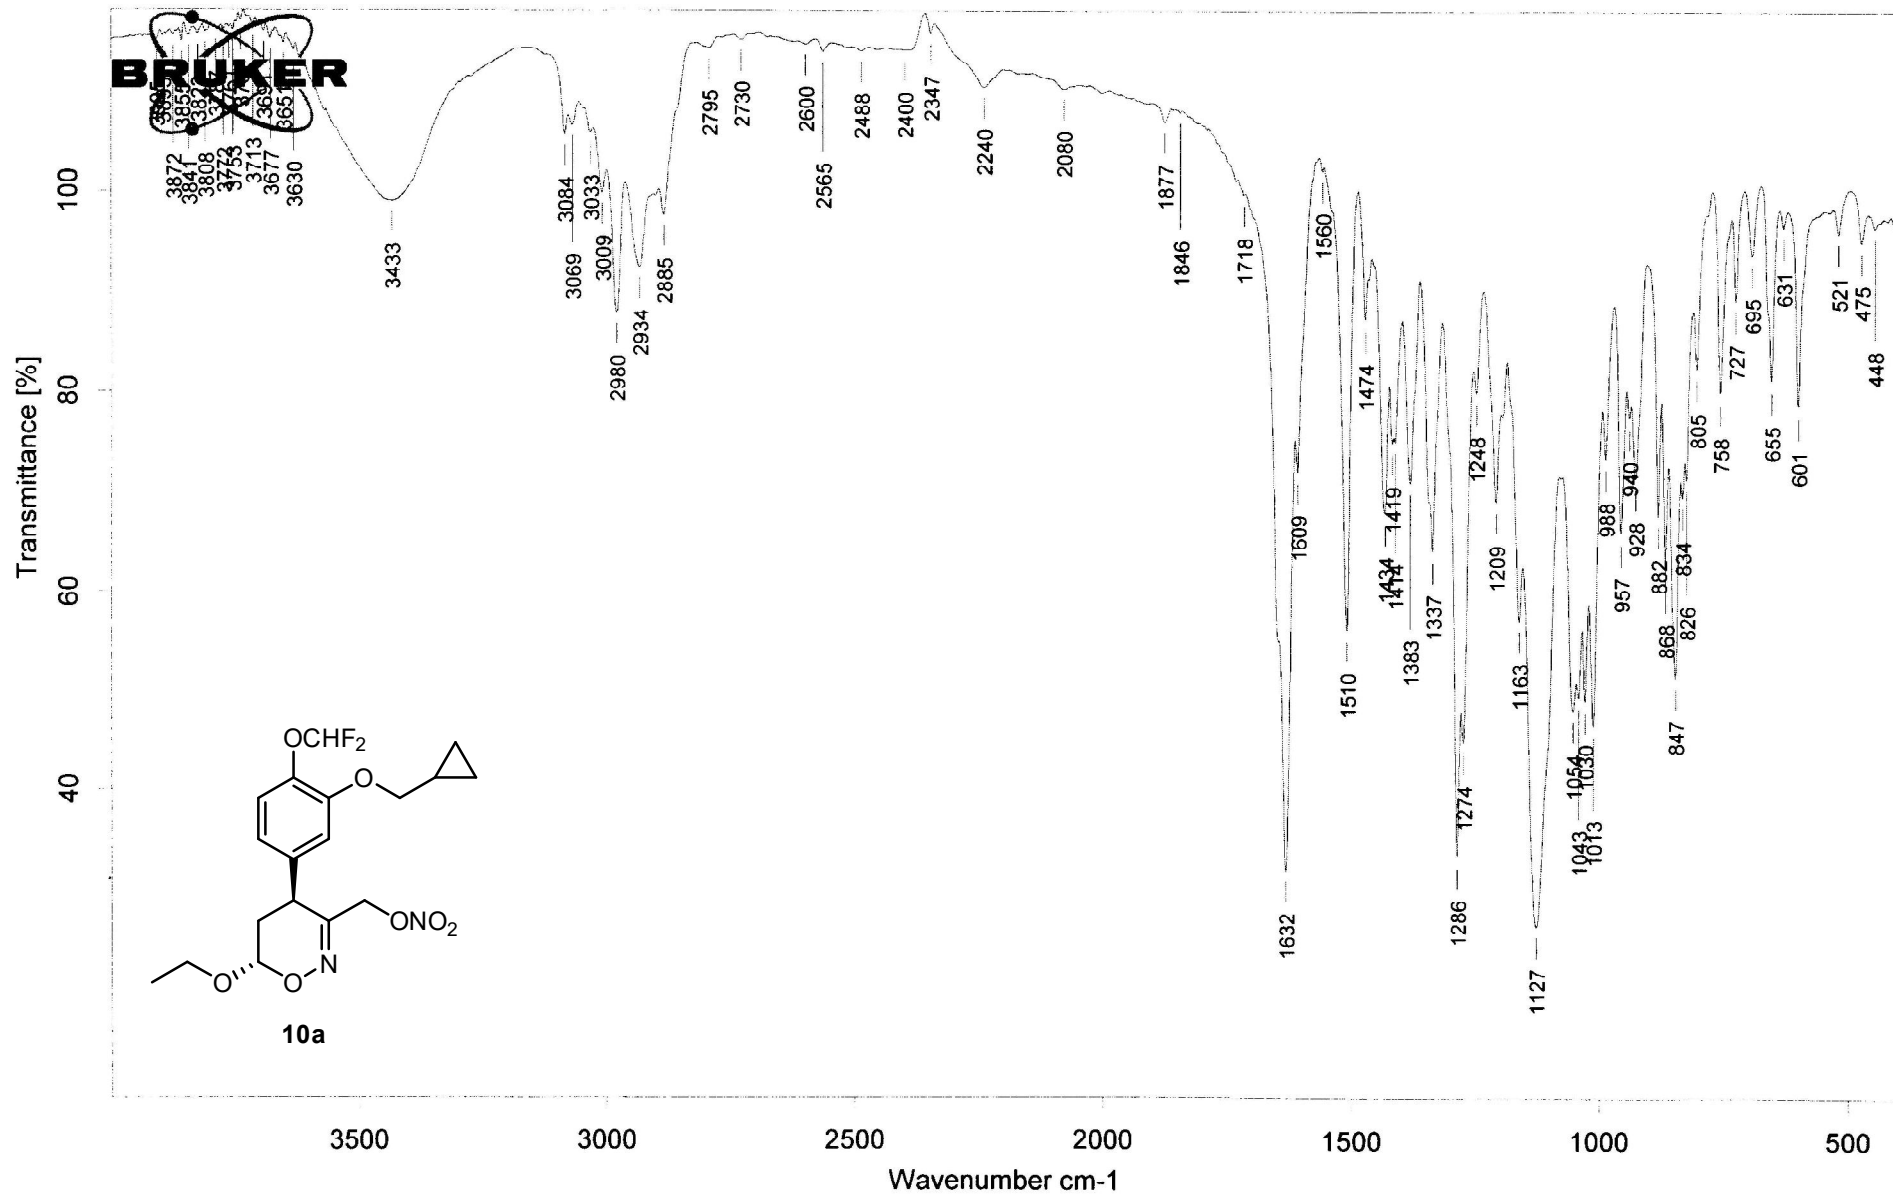

D:\EDLWAD-166.1

ДОРОХОВ. VAD-166 , прессовка с KBr, 1/200..

02.11.2015

<sup>1</sup>H NMR (300 MHz, CDCl<sub>3</sub>)

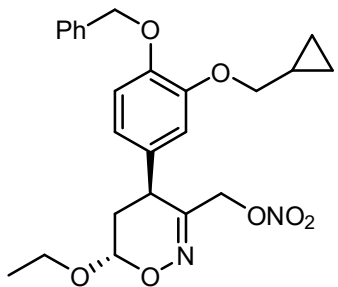

**10b**

7.46  
7.44  
7.40  
7.37  
7.35  
7.33  
7.31  
7.26  
7.11  
6.89  
6.86  
6.73  
6.69

5.19  
5.14  
4.81  
4.77  
4.74  
4.70

3.90  
3.87  
3.84  
3.68  
3.66  
3.64  
3.61  
3.58

2.31  
2.26  
2.24  
2.13  
2.09  
2.05

1.31  
1.25  
1.23  
1.21

0.65  
0.62  
0.37  
0.35

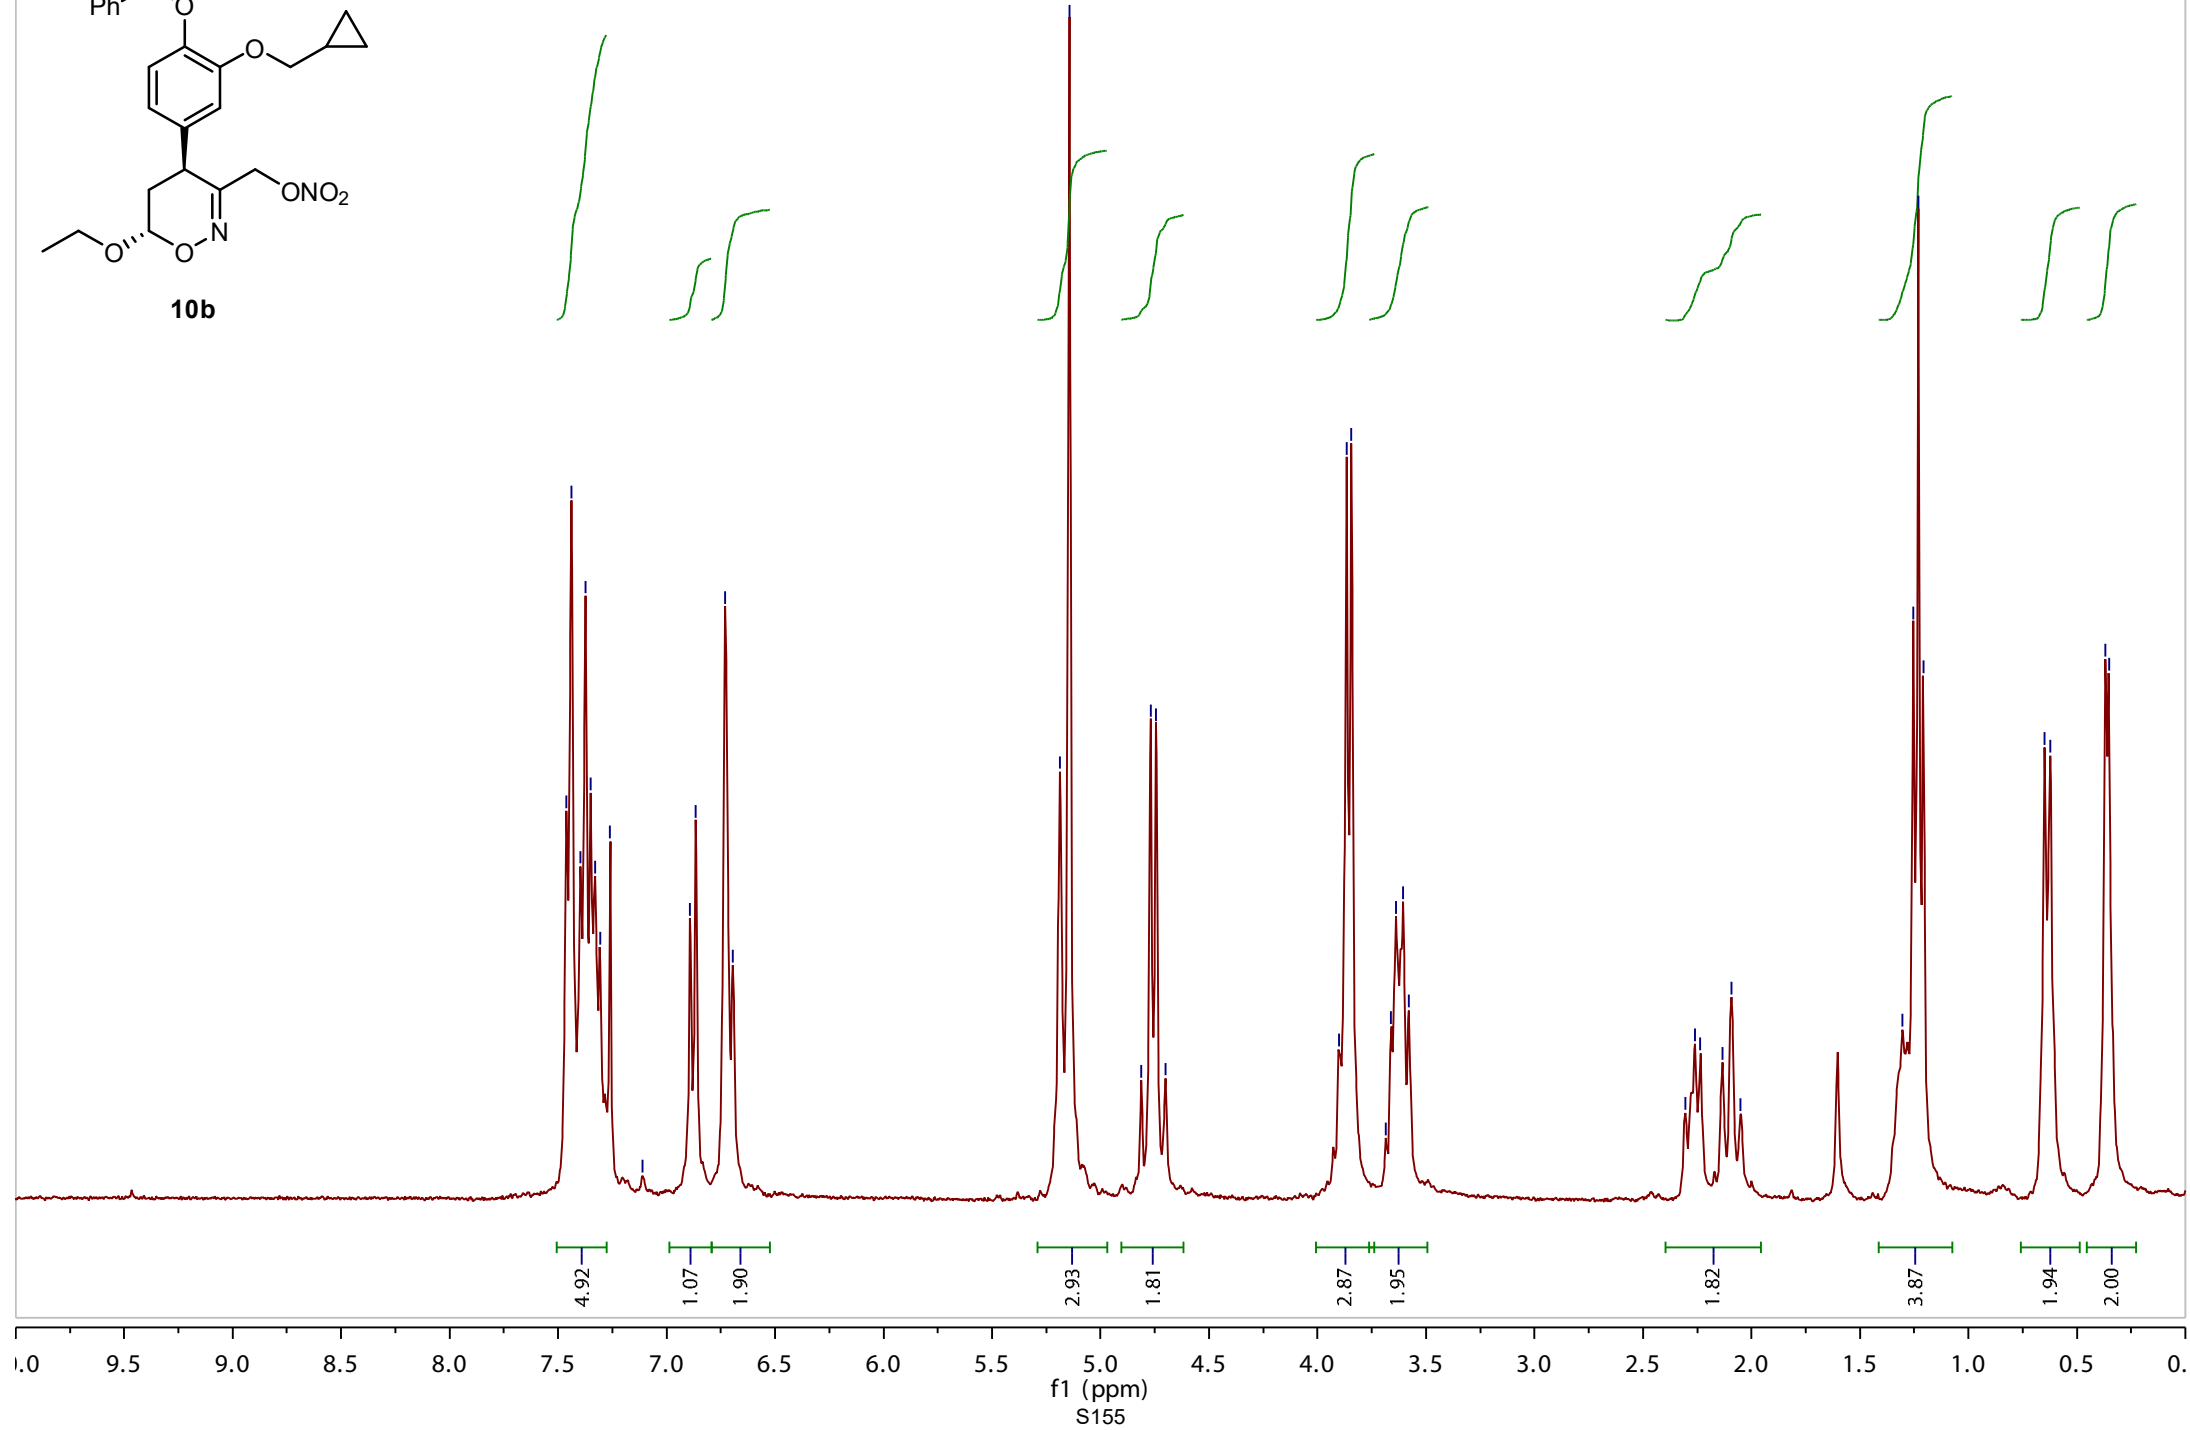

<sup>13</sup>C NMR (75 MHz, CDCl<sub>3</sub>)

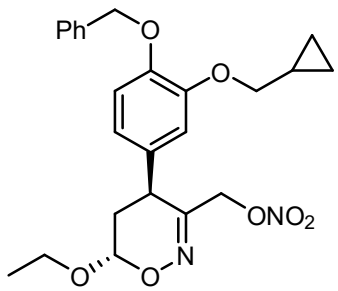

**10b**

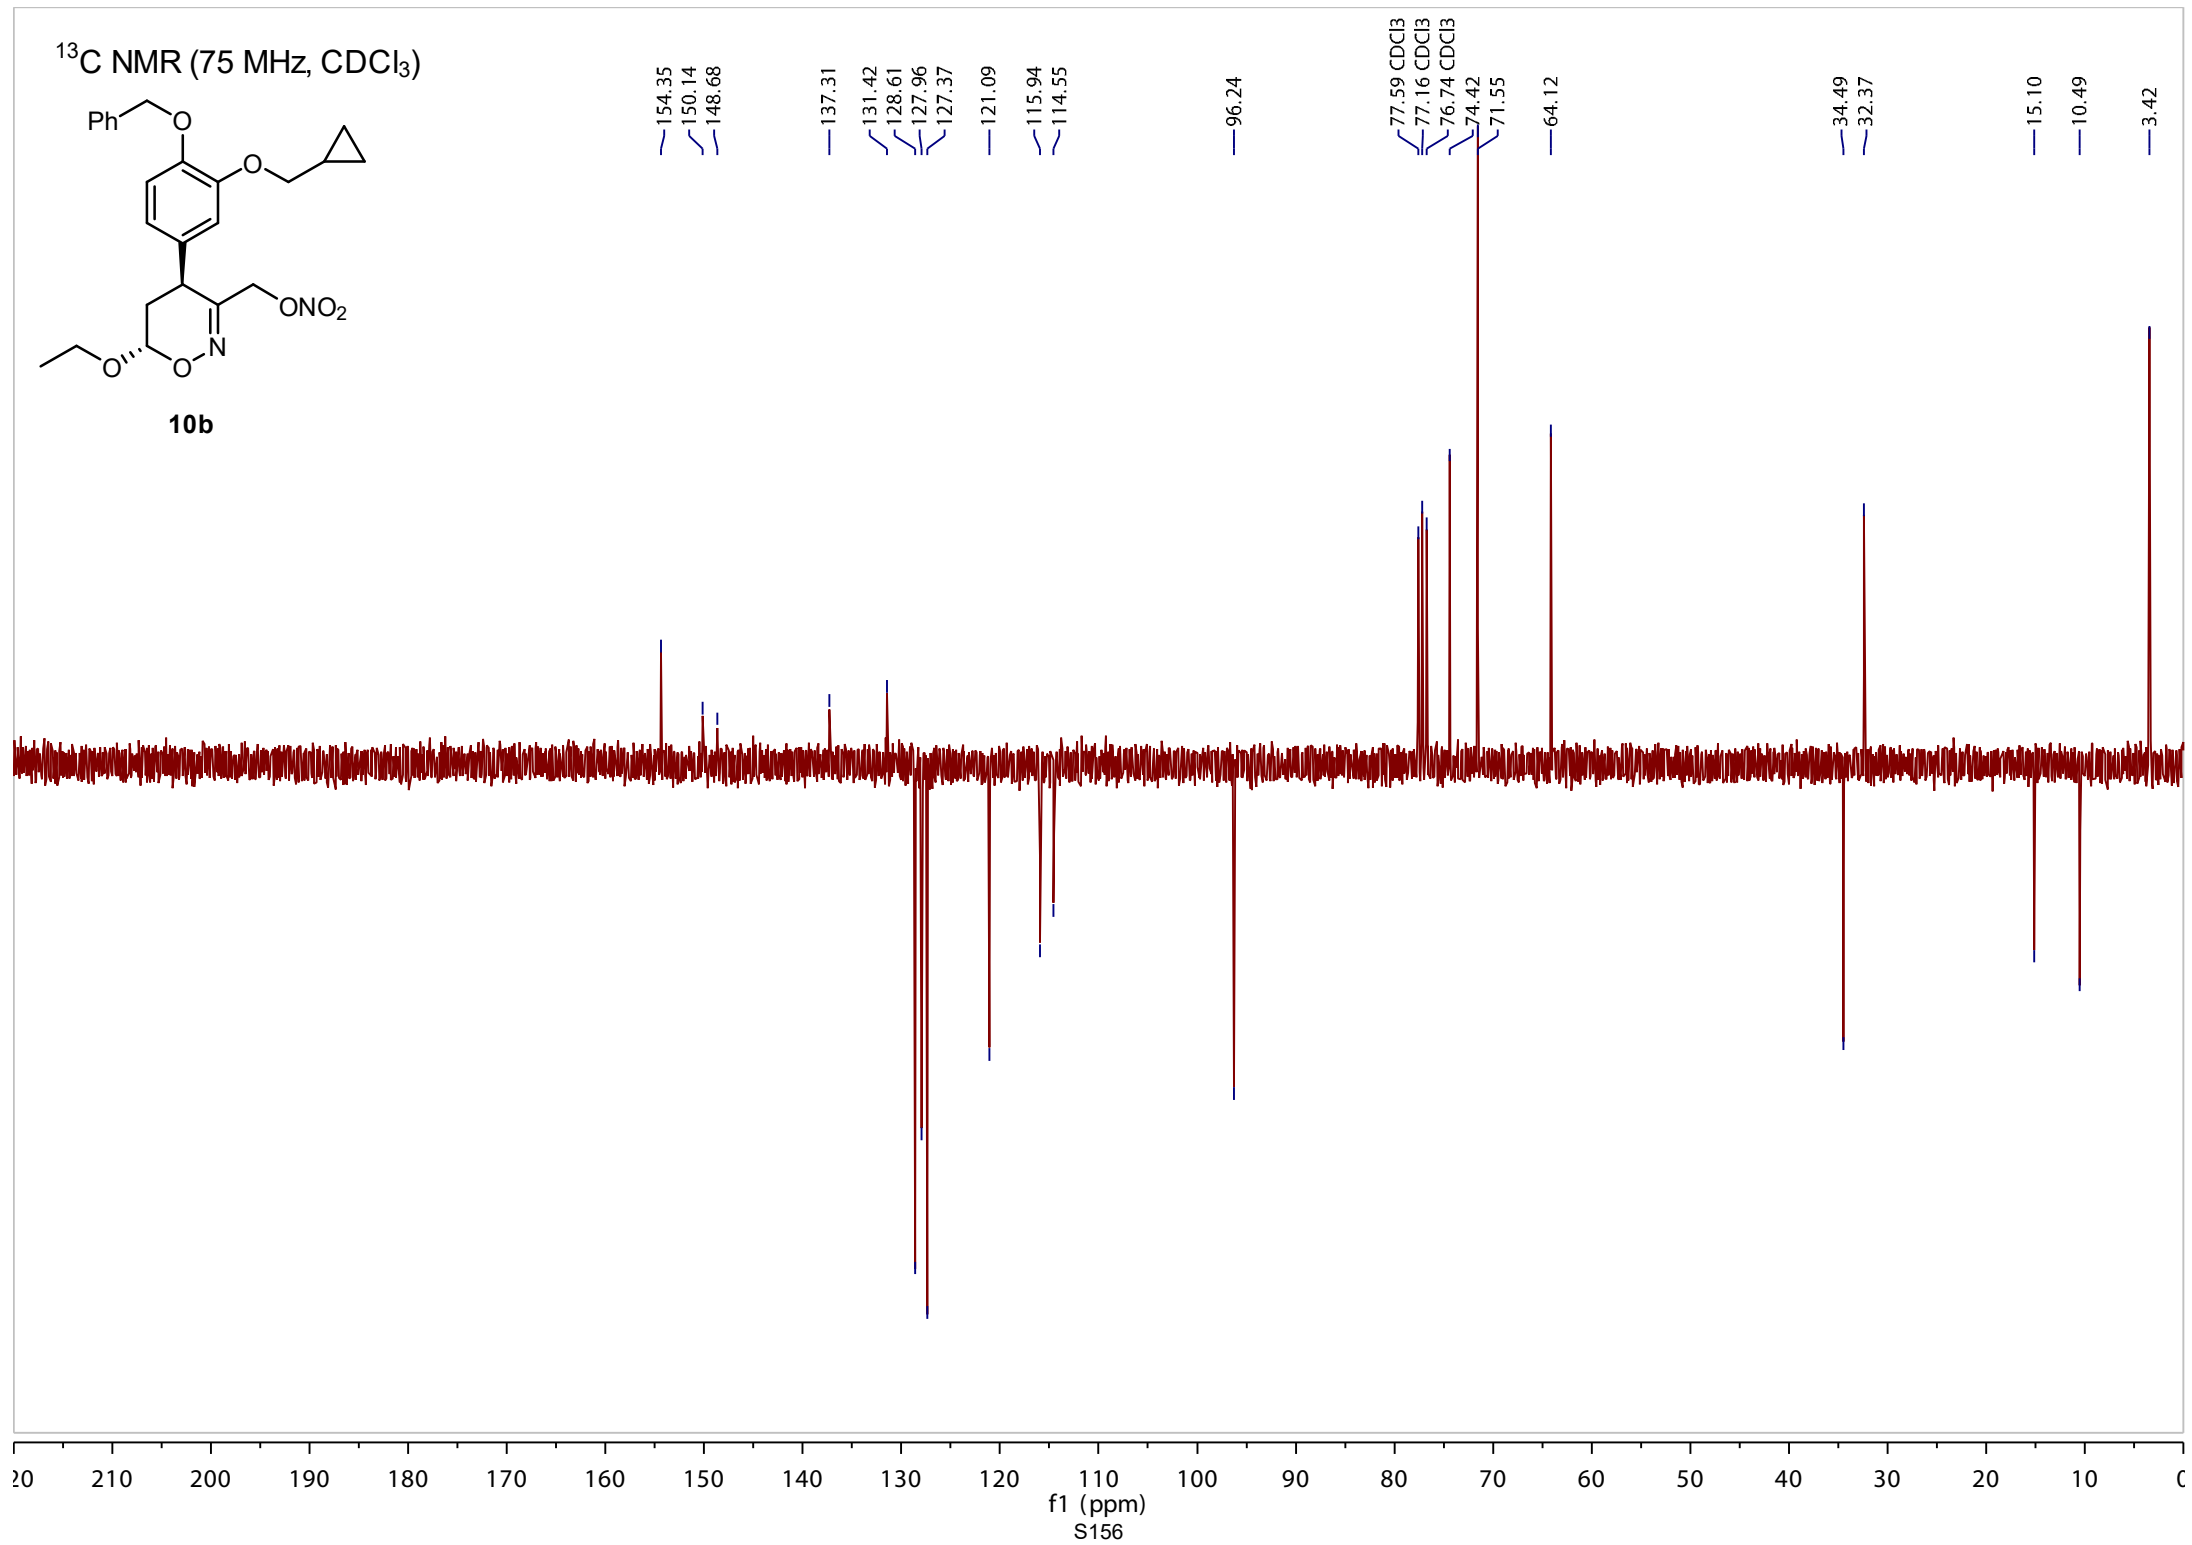

<sup>1</sup>H NMR (300 MHz, CDCl<sub>3</sub>)

7.35  
7.31  
7.29  
7.26  
7.24  
7.20  
7.17  
7.09  
7.06  
6.84  
6.60  
6.60  
6.59  
6.34

5.39

4.36  
4.31  
4.22  
4.17  
3.95  
3.83  
3.80

2.95  
2.93  
2.61  
2.58  
2.54  
2.44  
2.40  
2.35

1.94  
1.89  
1.56  
1.41  
1.27

0.67  
0.64  
0.37  
0.35

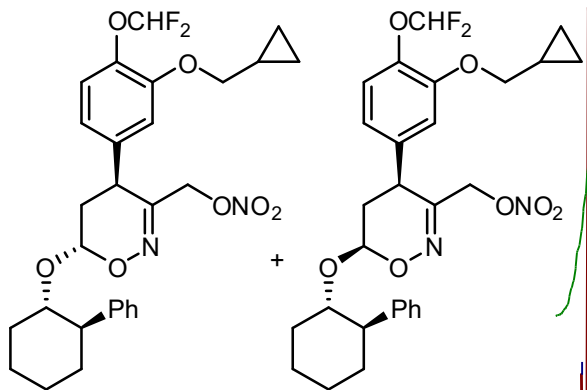

**10c**

**10c'**

(minor 4,6-*cis* isomer)

d.r. 4.5 : 1

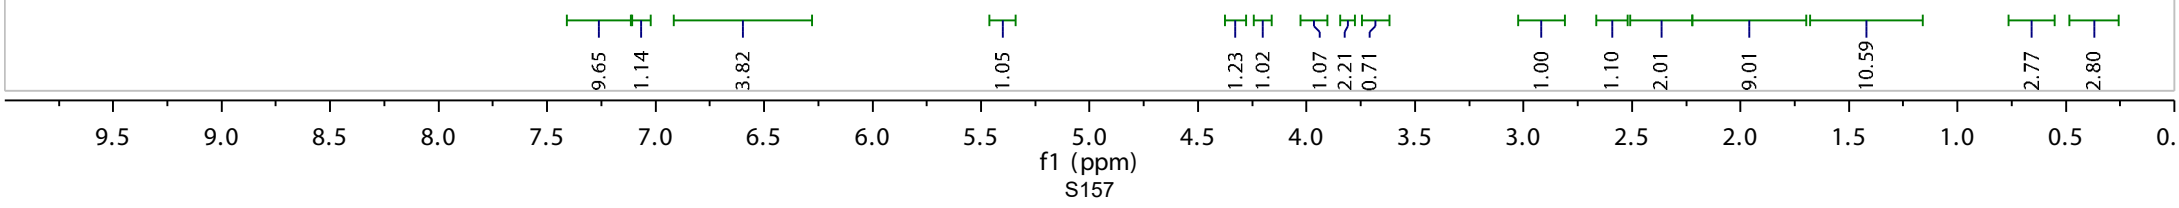



$^{14}\text{N}$  NMR (22 MHz,  $\text{CDCl}_3$ )

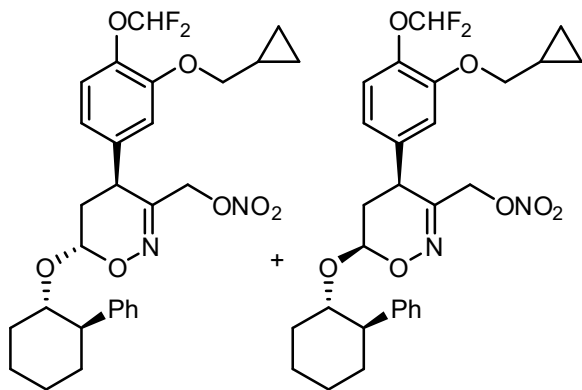

**10c**

**10c'**

(minor 4,6-*cis* isomer)

**d.r. 4.5 : 1**

-45.55

200

150

100

50

0

f1 (ppm)

S159

-50

-100

-150

-200





COSY NMR

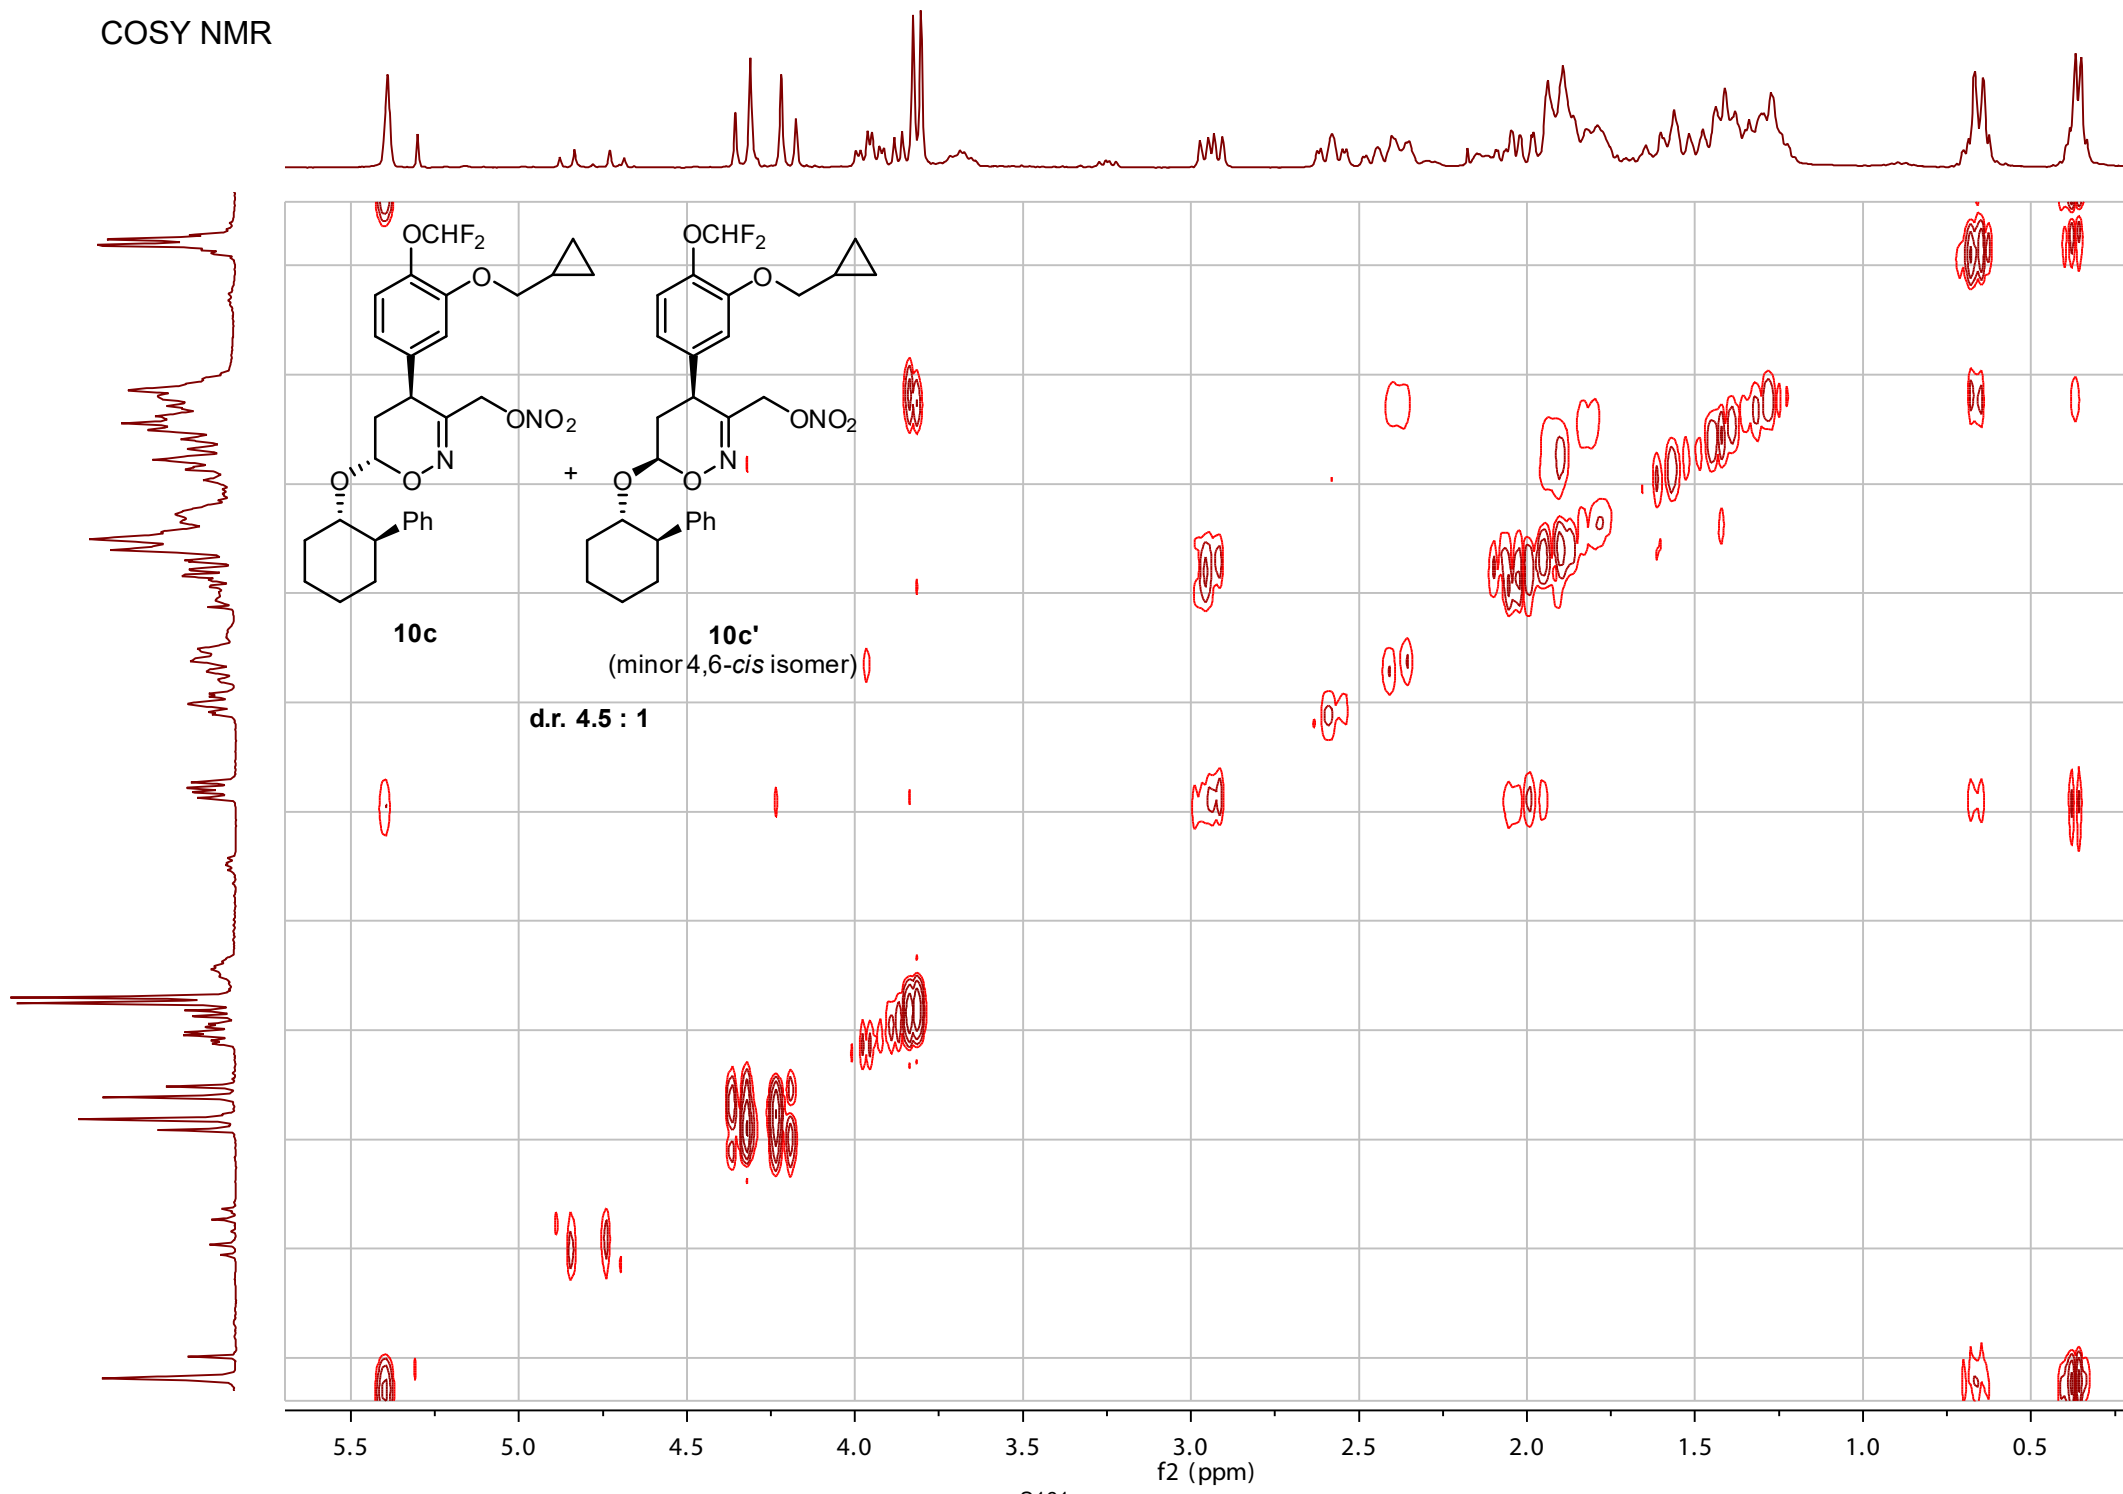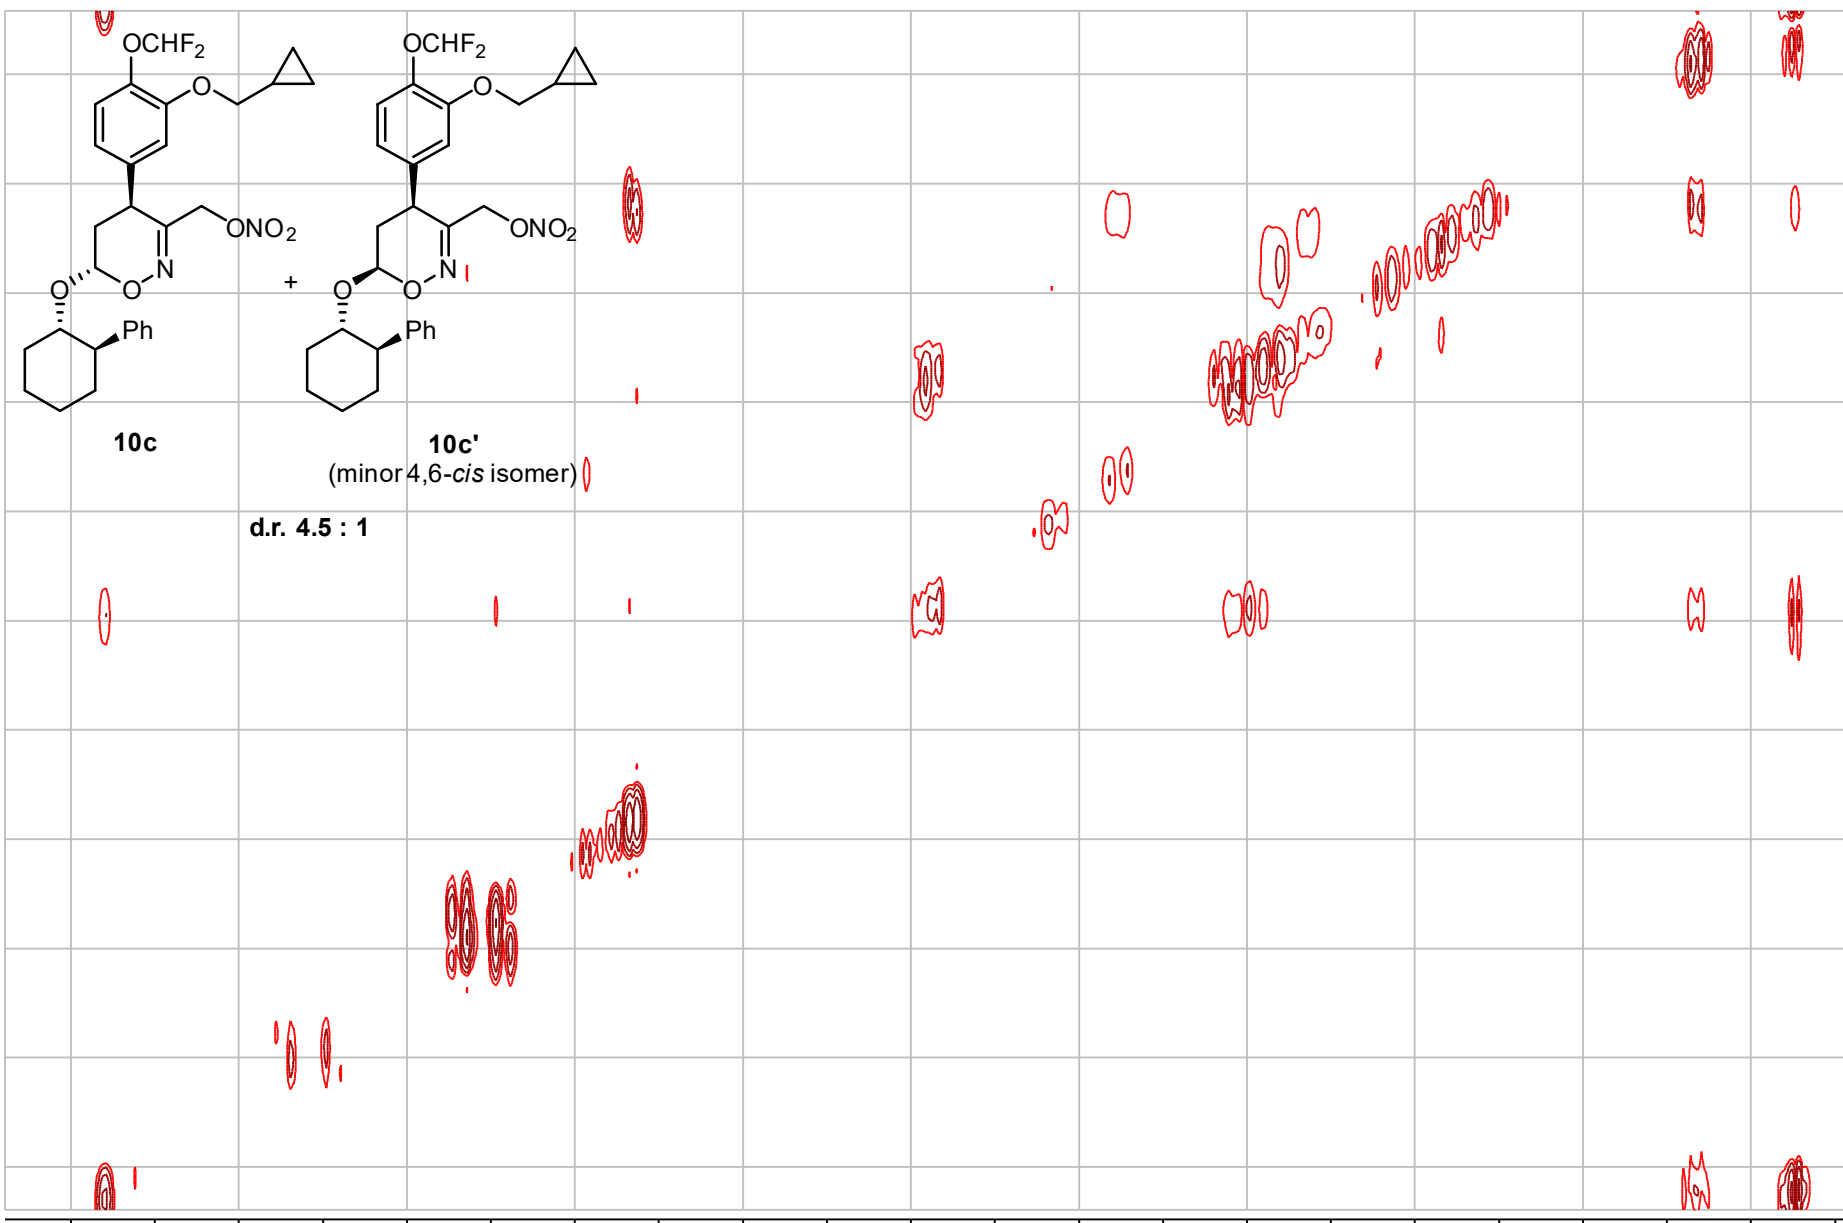

5.5 5.0 4.5 4.0 3.5 3.0 2.5 2.0 1.5 1.0 0.5

f2 (ppm)

<sup>1</sup>H NMR (300 MHz, CDCl<sub>3</sub>)

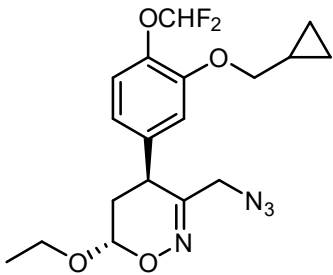

11a

7.26  
7.15  
7.12  
6.86  
6.78  
6.77  
6.76  
6.61  
6.36

5.18

3.92  
3.89  
3.85  
3.83  
3.81  
3.75  
3.73  
3.64  
3.46  
3.42

2.30

2.09

1.27

1.24

1.22

0.66

0.63

0.36

0.34

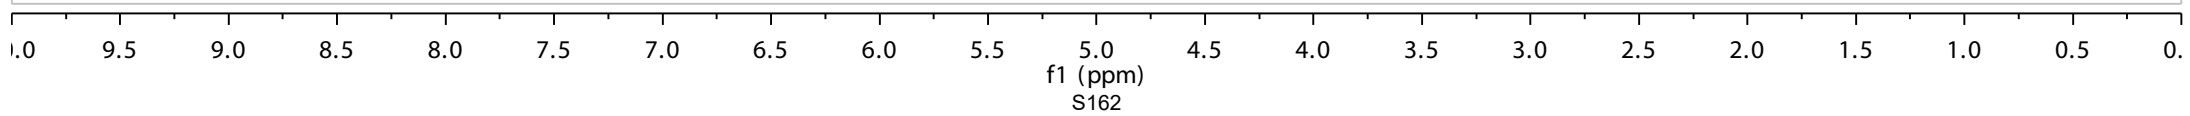

$^{13}\text{C}$  NMR (50 MHz,  $\text{CDCl}_3$ )

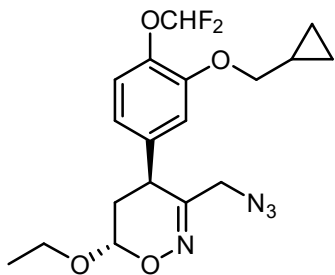

**11a**

156.62  
151.23  
137.72  
136.80  
123.54  
120.88  
119.94  
116.17  
114.26  
112.14  
95.86  
77.16  
74.09  
64.06  
52.61  
34.69  
32.79  
15.08  
10.18  
3.32

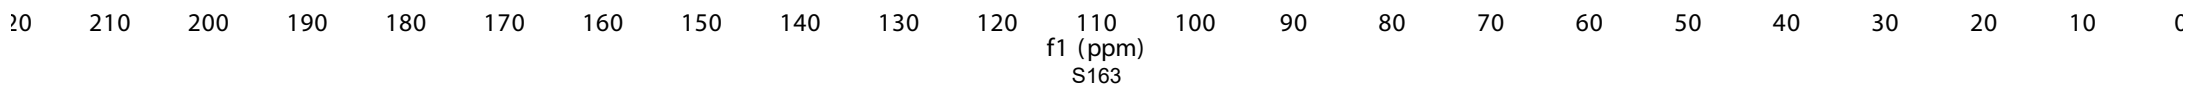

$^{19}\text{F}$  NMR (188 MHz,  $\text{CDCl}_3$ )

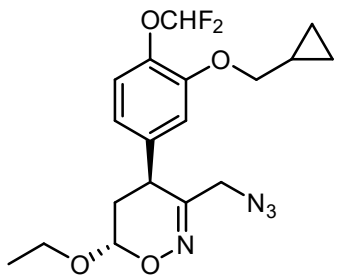

**11a**

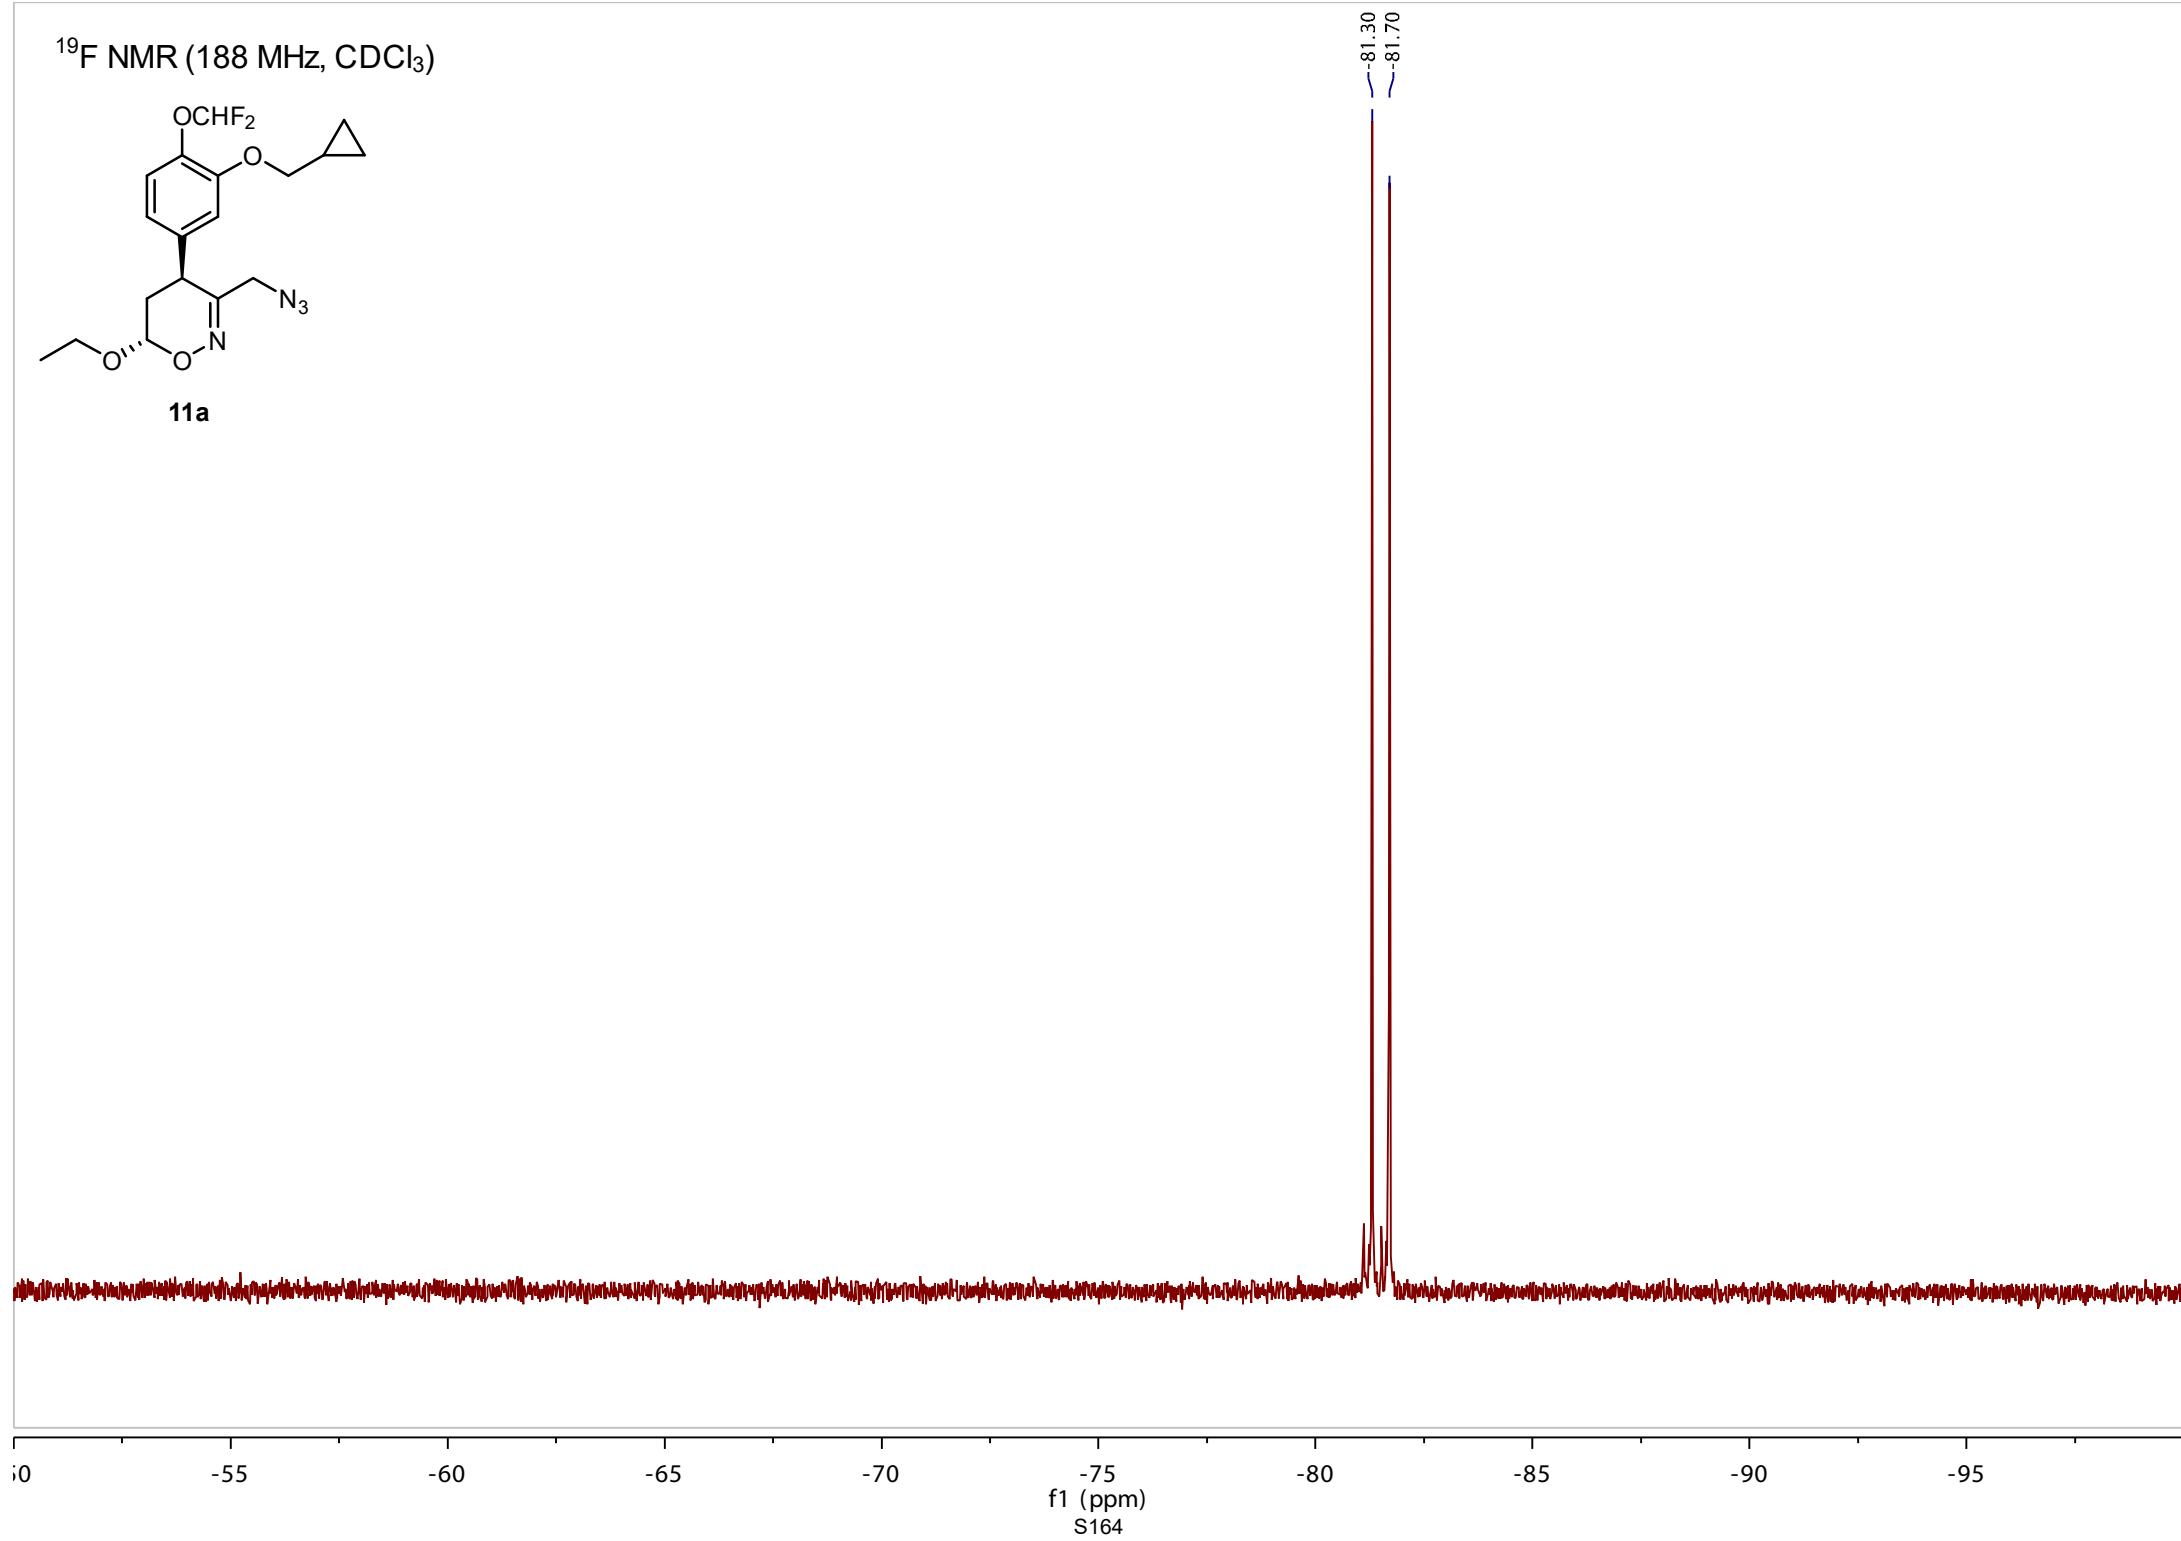

COSY NMR

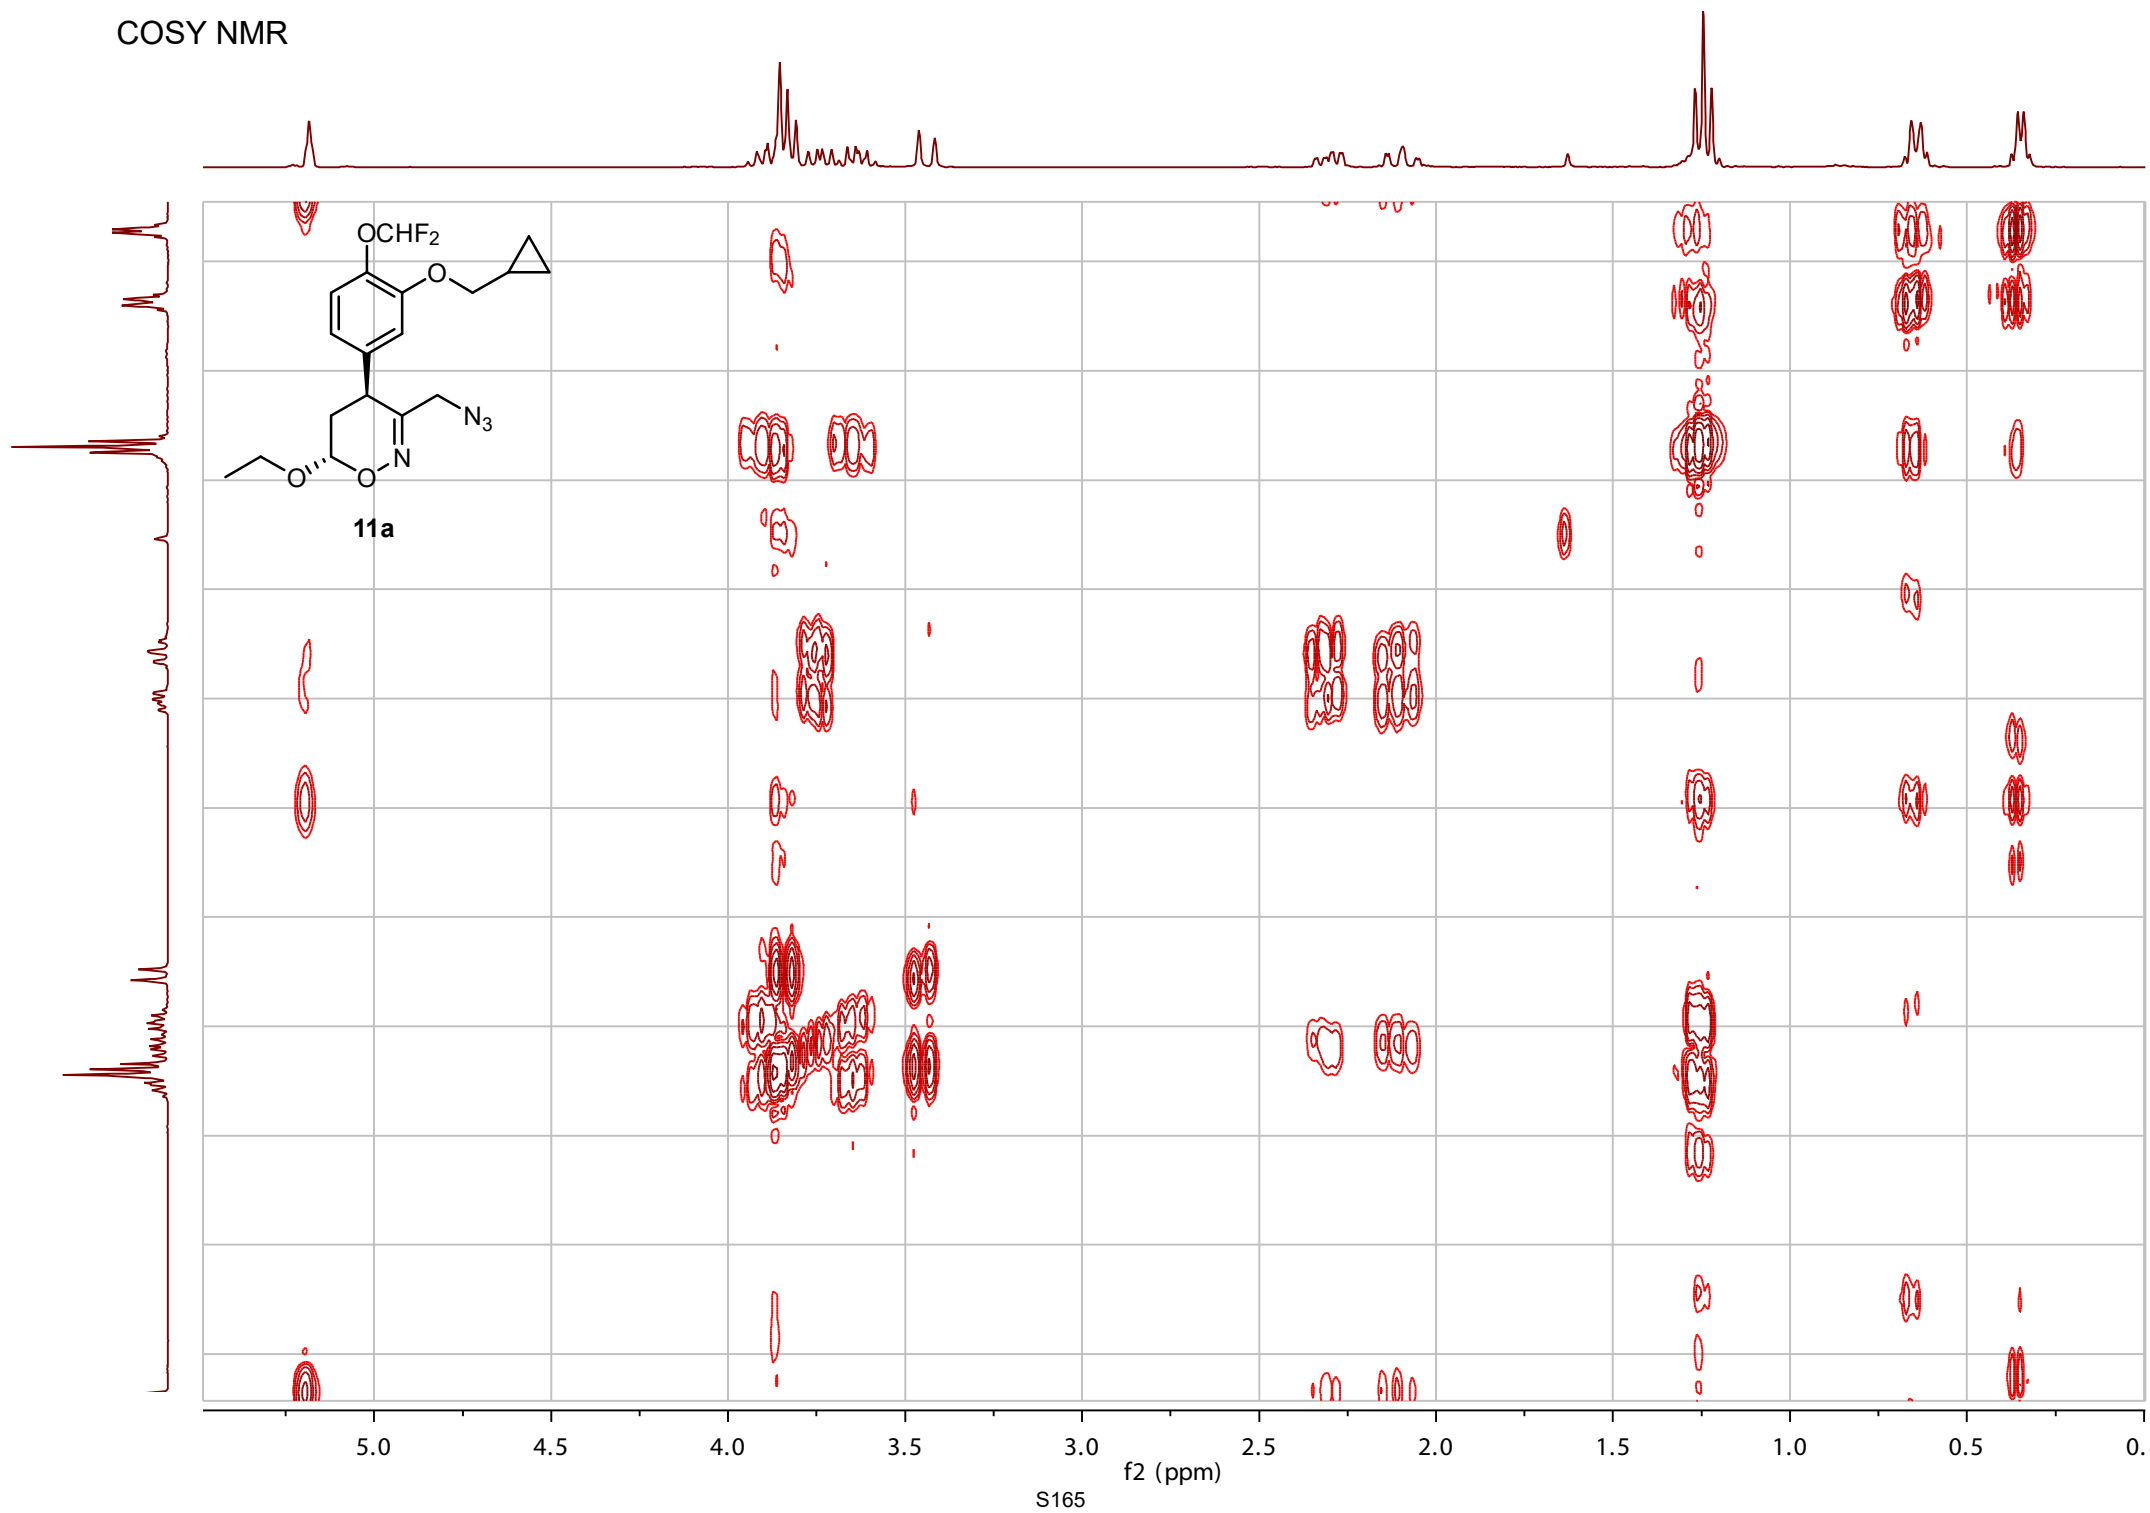

# HSQC NMR

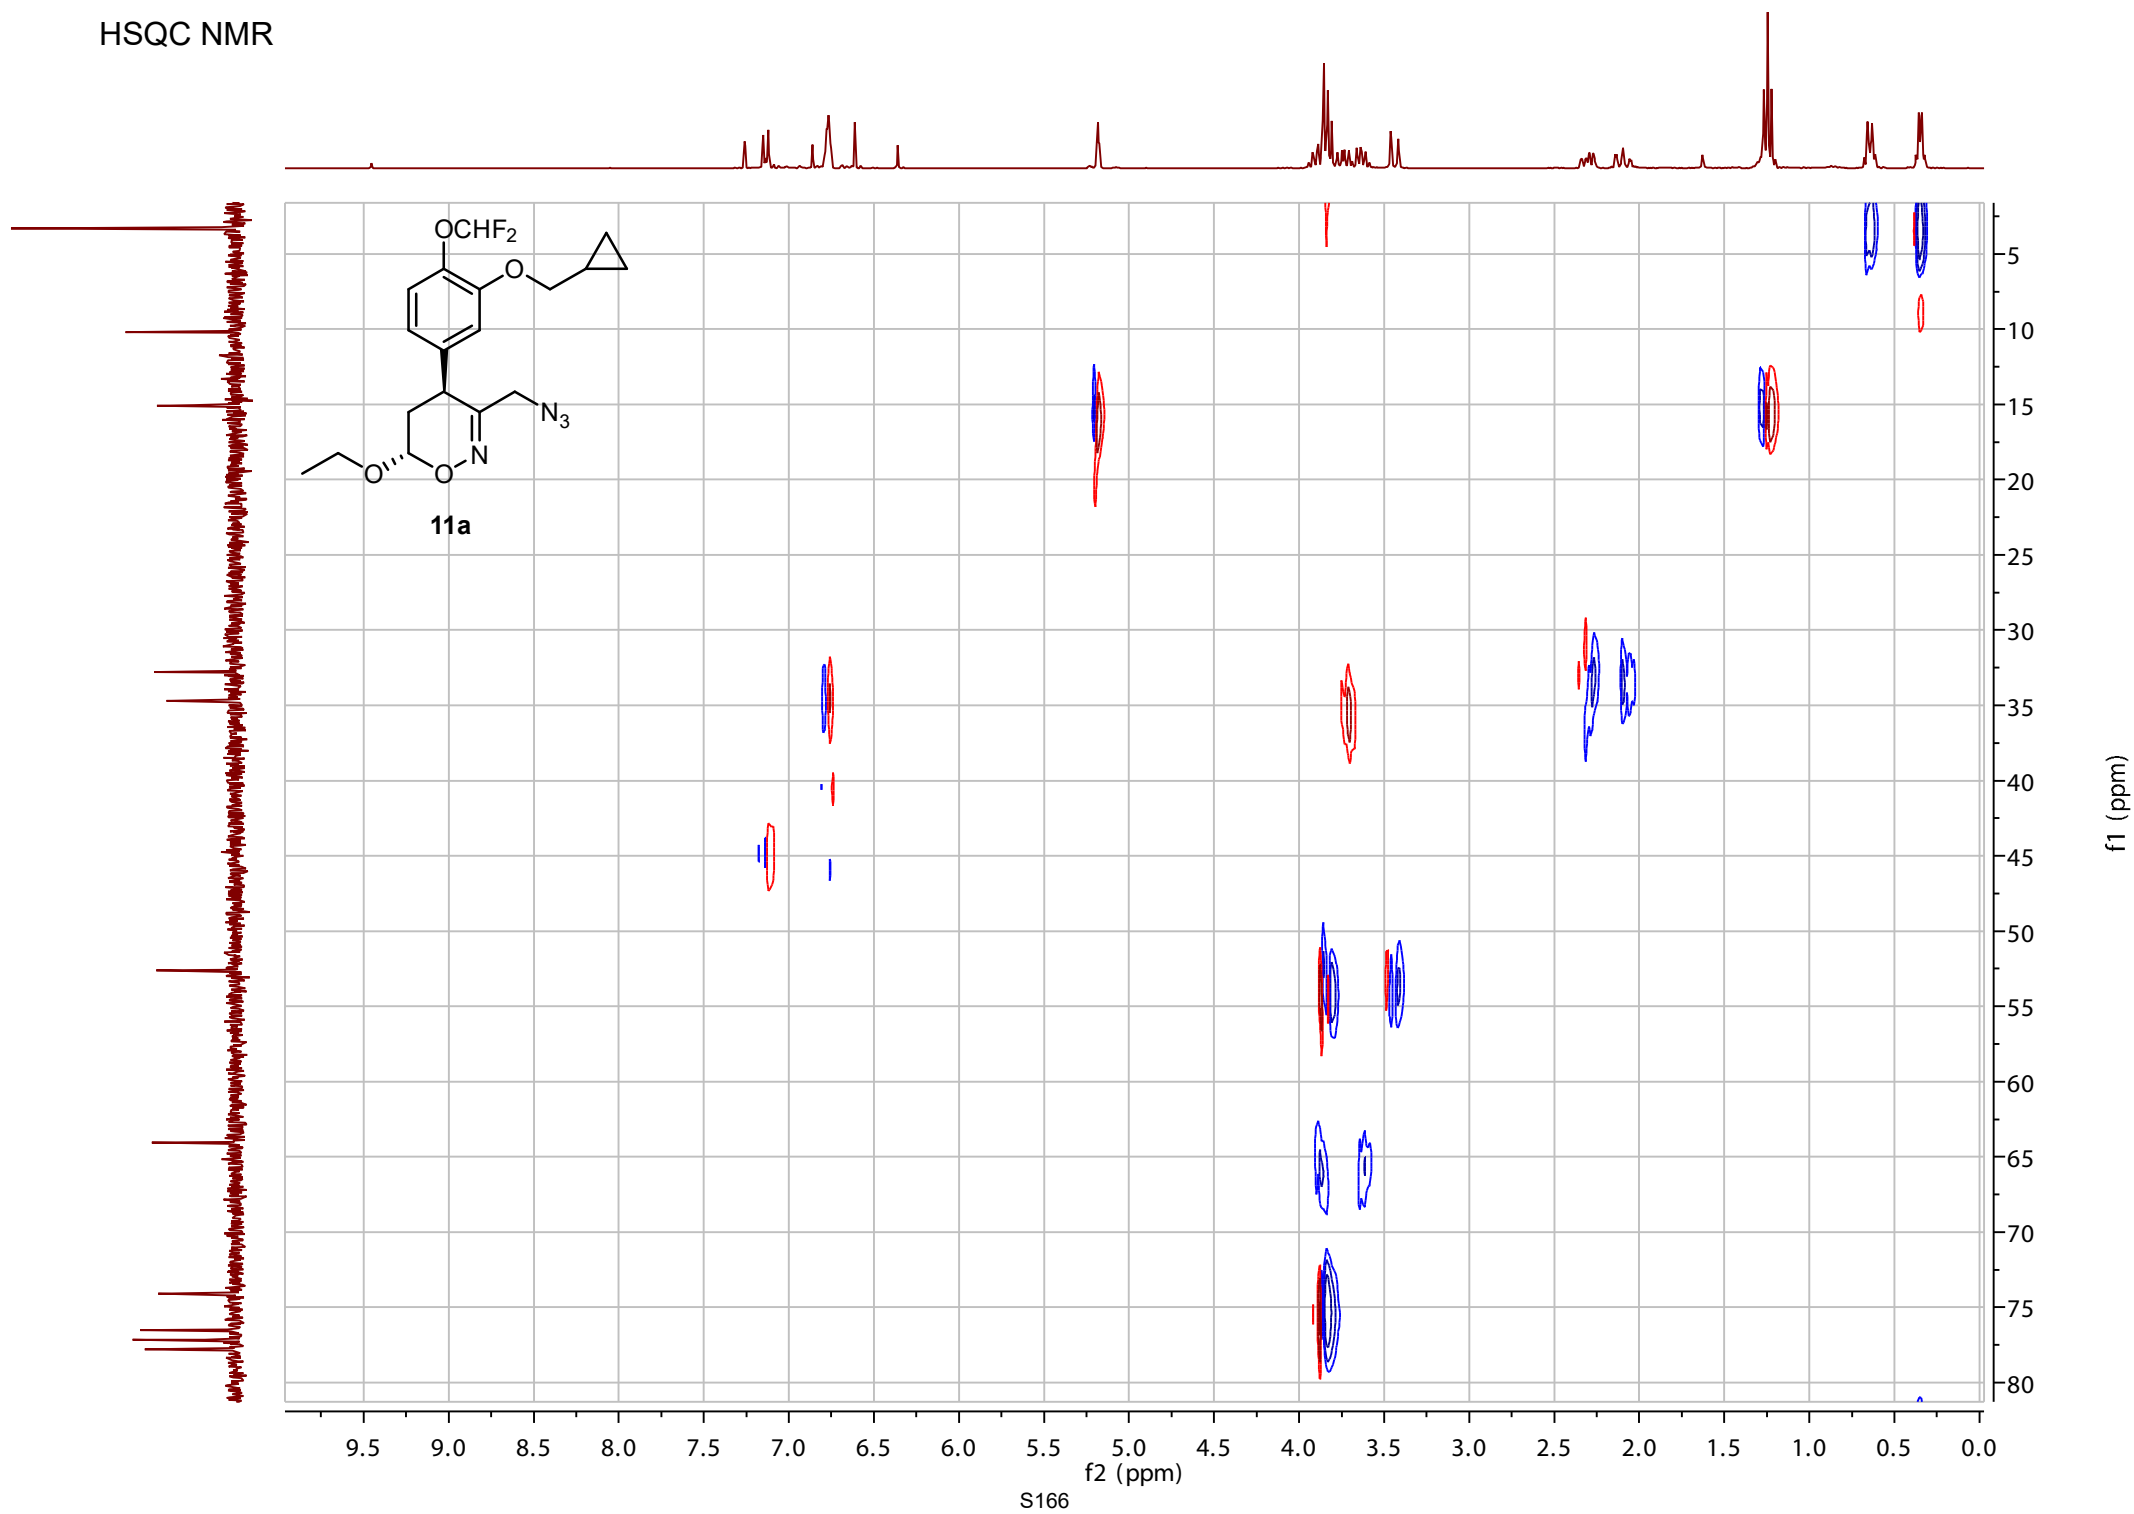

<sup>1</sup>H NMR (300 MHz, CDCl<sub>3</sub>)

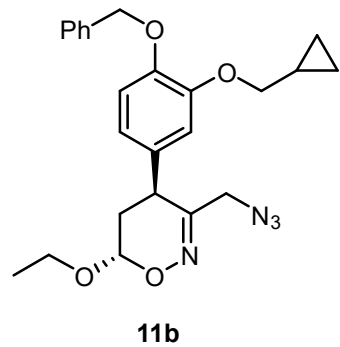

7.46  
7.44  
7.37  
7.34  
7.26  
6.90  
6.87  
6.73  
6.70

5.17  
5.14

3.89  
3.87  
3.85  
3.82  
3.78  
3.69  
3.64  
3.47  
3.43

2.33  
2.30  
2.28  
2.25  
2.11

1.27  
1.25  
1.23

0.64  
0.61  
0.36  
0.35

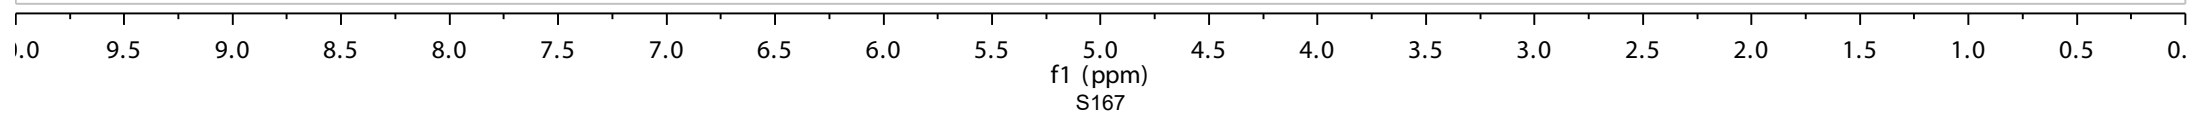

$^{13}\text{C}$  NMR (75 MHz,  $\text{CDCl}_3$ )

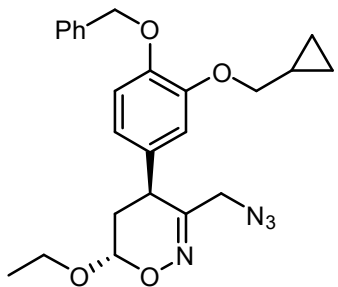

**11b**

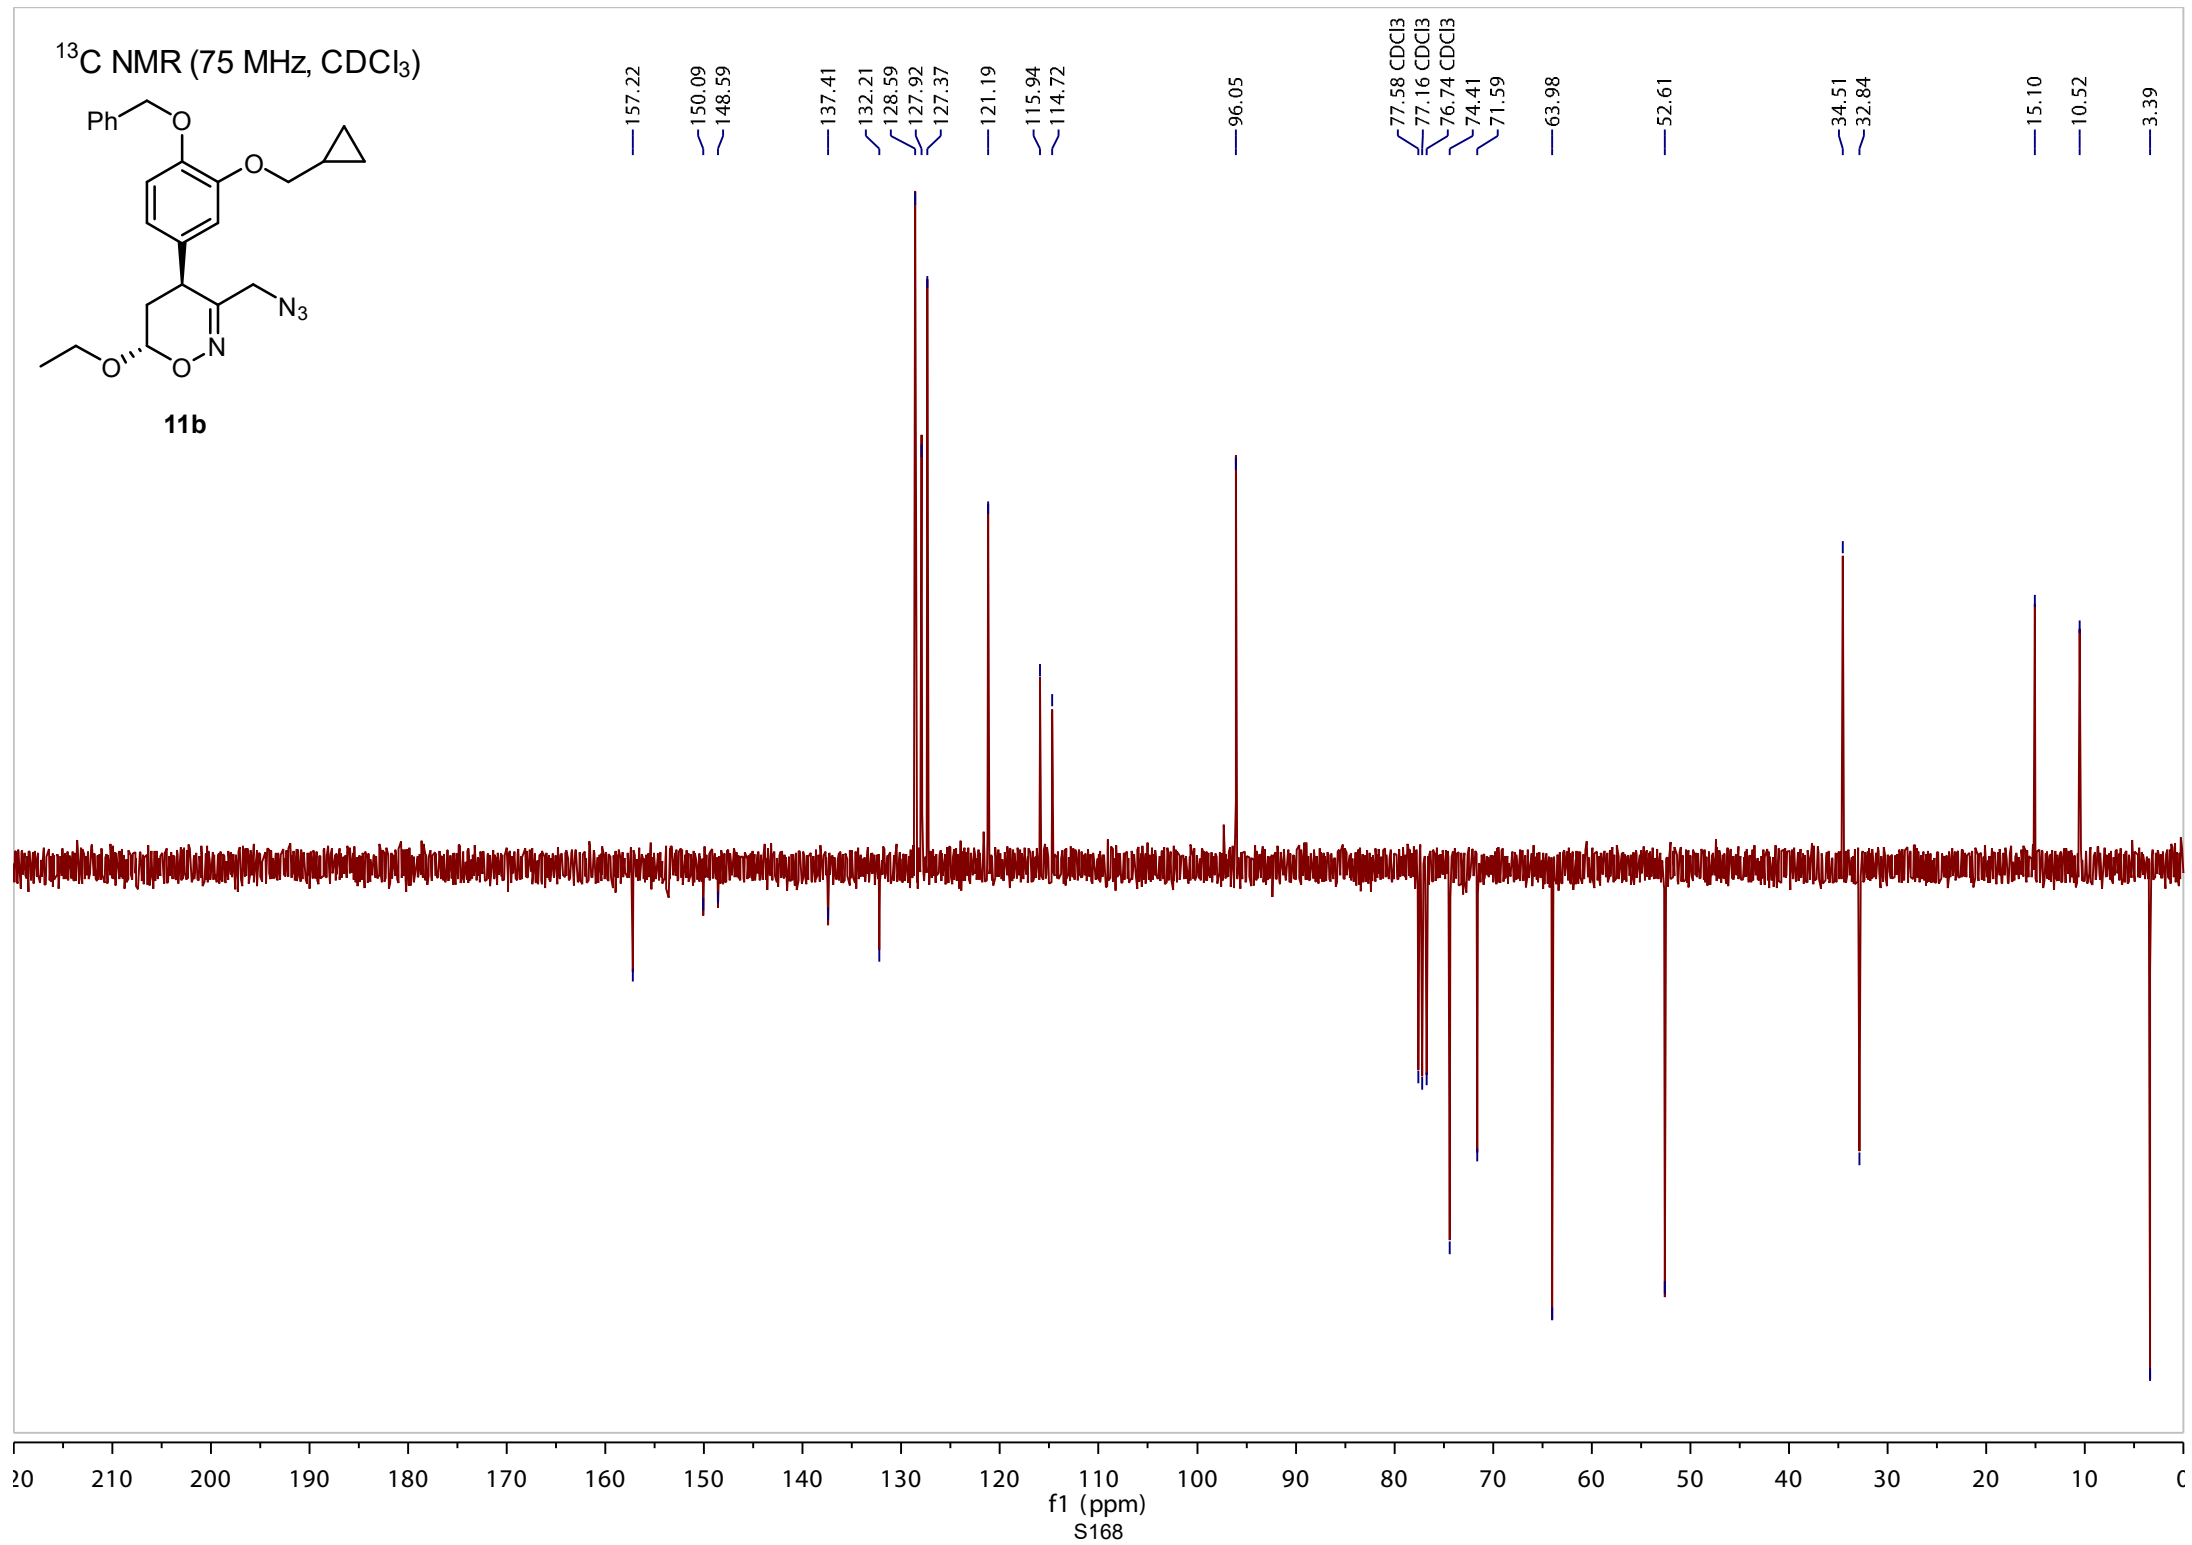





<sup>13</sup>C NMR (75 MHz, CDCl<sub>3</sub>)

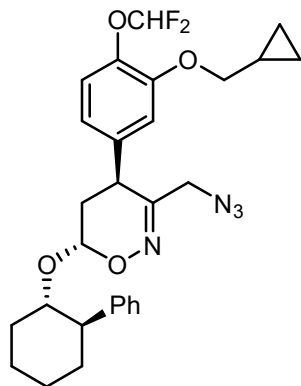

11c

155.21  
151.03  
144.68  
137.39  
128.17  
128.05  
125.94  
123.21  
121.59  
121.19  
119.65  
116.20  
114.19  
112.76  
90.62  
77.16  
76.34  
74.08  
51.61  
50.93  
34.63  
33.96  
32.36  
30.55  
26.22  
24.72  
10.21  
3.31

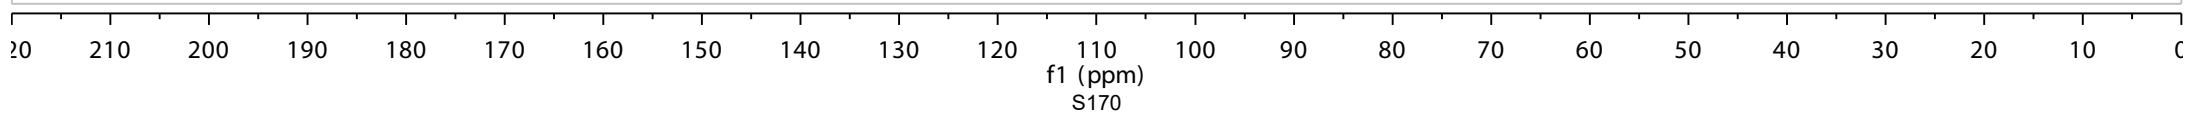

$^{19}\text{F}$  NMR (282 MHz,  $\text{CDCl}_3$ )

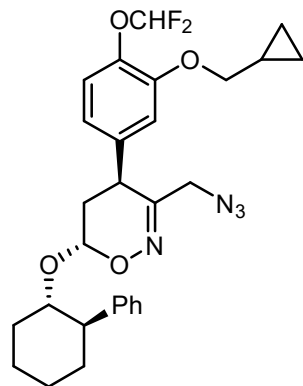

**11c**

-82.32

-82.59

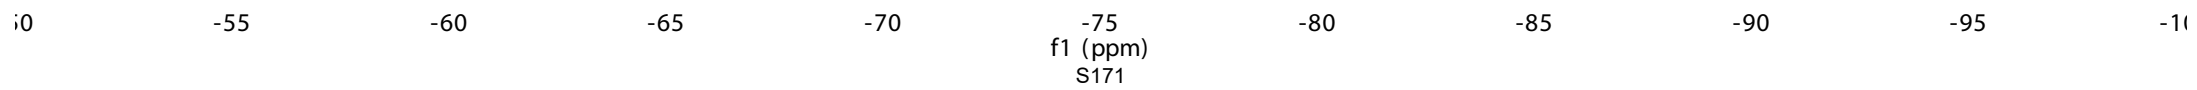

COSY NMR

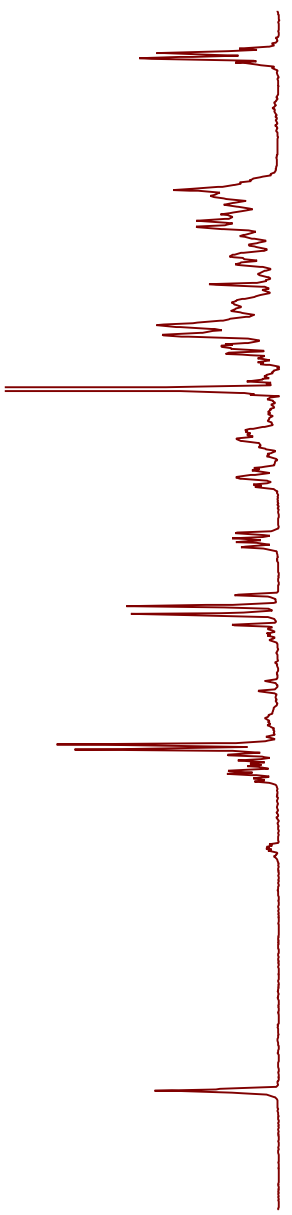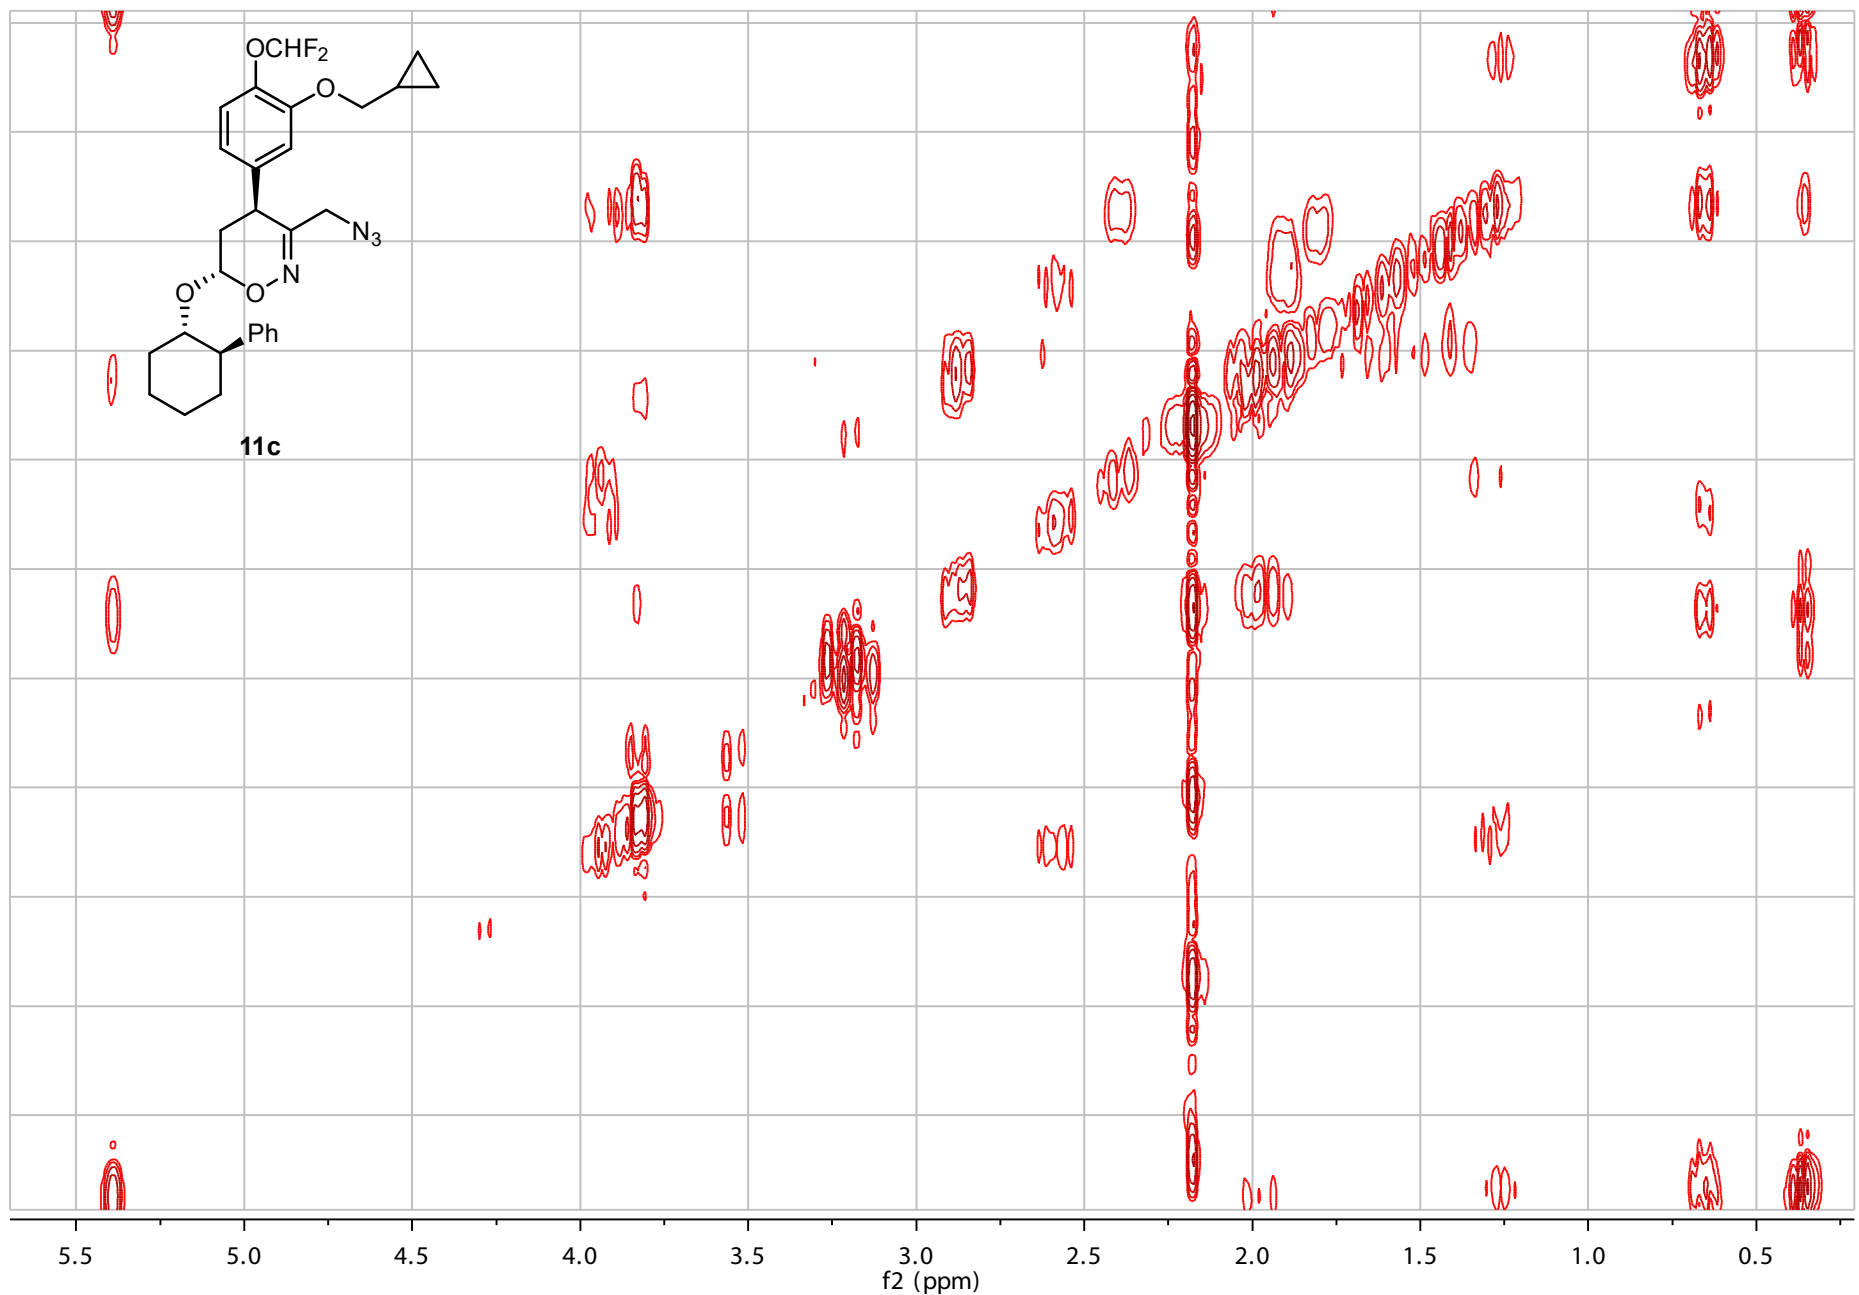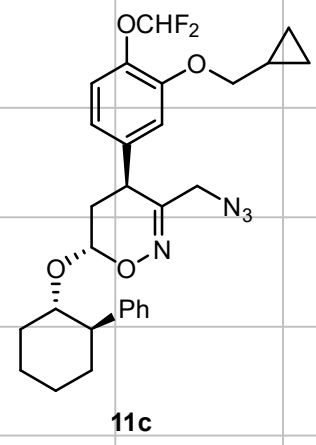

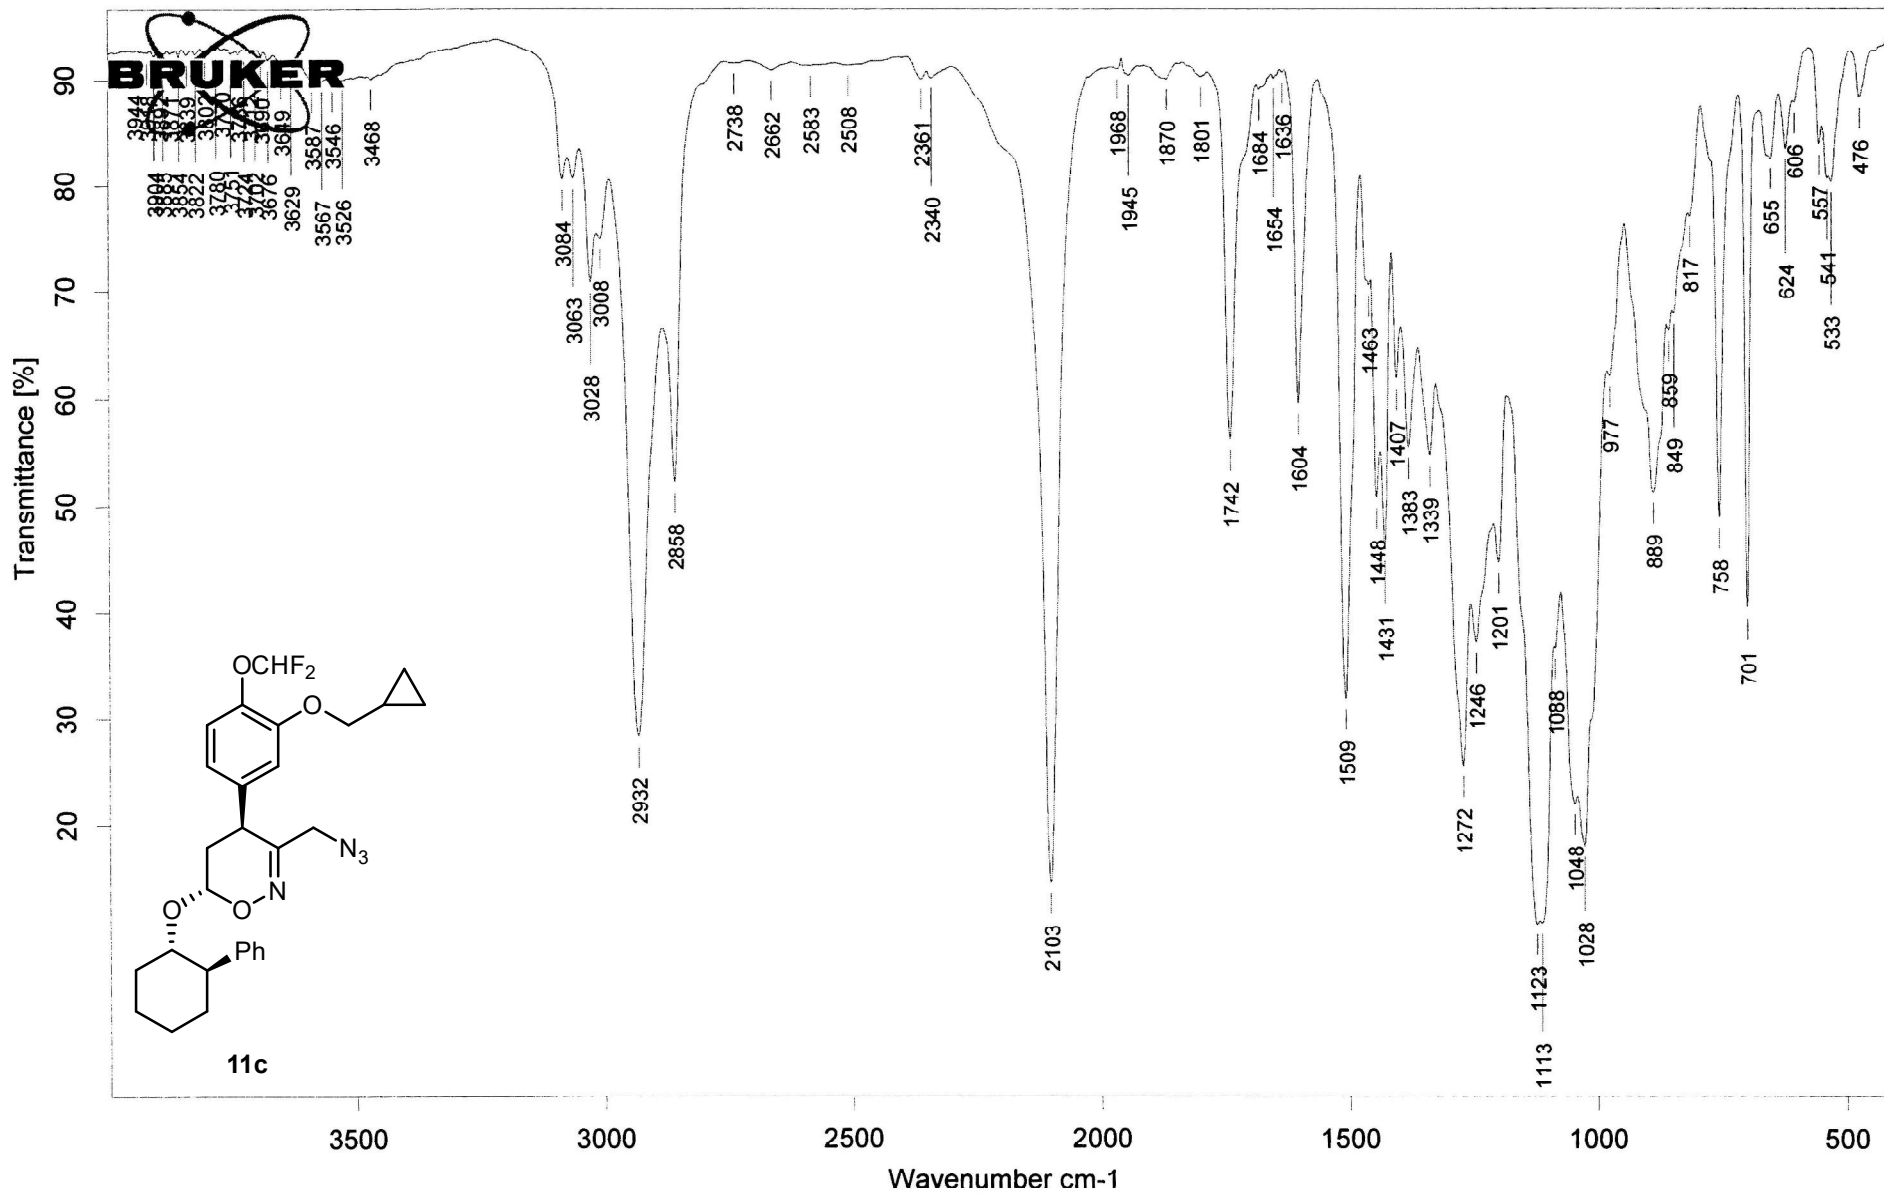

D:\EDLIVAD179.0

ДОРОХОВ.

VAD179,

тонкий слой пл. КВг

23.12.2015

<sup>1</sup>H NMR (300 MHz, CDCl<sub>3</sub>)

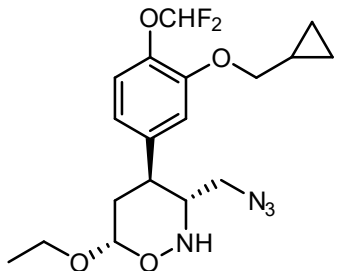

12a

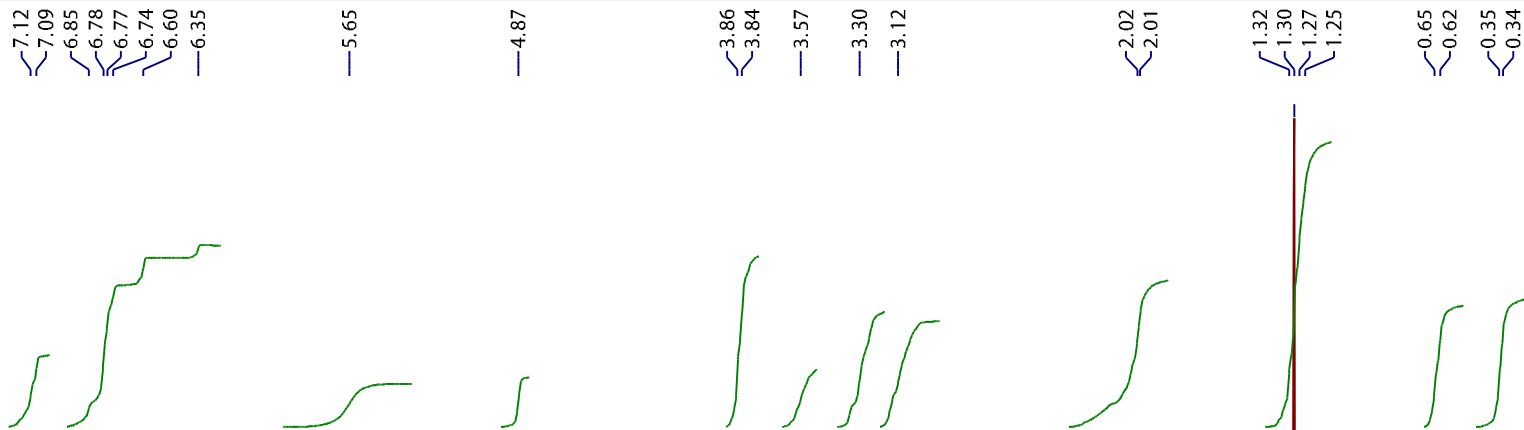

7.12  
7.09  
6.85  
6.78  
6.77  
6.74  
6.60  
6.35  
5.65  
4.87  
3.86  
3.84  
3.57  
3.30  
3.12  
2.02  
2.01  
1.32  
1.30  
1.27  
1.25  
0.65  
0.62  
0.35  
0.34

1.0 9.5 9.0 8.5 8.0 7.5 7.0 6.5 6.0 5.5 5.0 4.5 4.0 3.5 3.0 2.5 2.0 1.5 1.0 0.5 0.0

f1 (ppm)

S174

1.46 3.68 0.88 1.00 3.46 1.17 2.34 2.14 2.97 5.78 2.46 2.61

<sup>13</sup>C NMR (50 MHz, CDCl<sub>3</sub>)

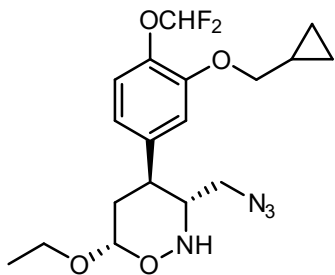

**12a**

151.02

140.27

123.30

119.87

116.33

114.27

97.87

74.16

63.83

61.37

51.15

37.92

36.51

15.28

10.30

3.26

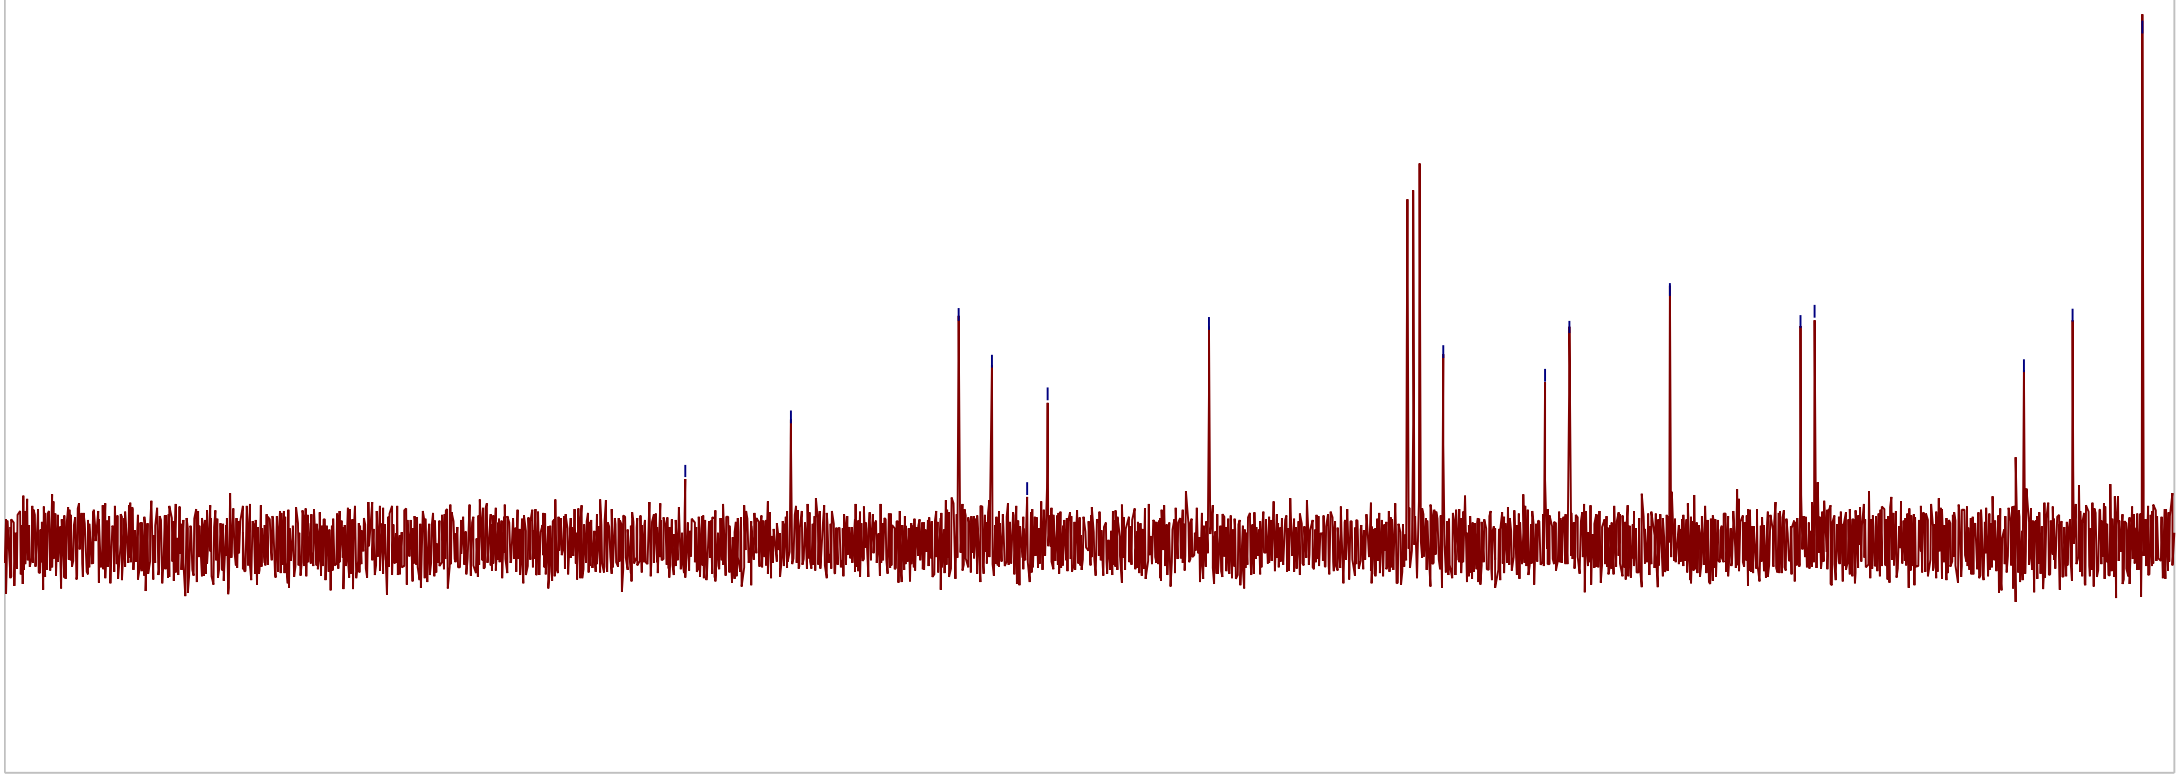

210 200 190 180 170 160 150 140 130 120 110 100 90 80 70 60 50 40 30 20 10 0

f1 (ppm)

S175

$^{19}\text{F}$  NMR (188 MHz,  $\text{CDCl}_3$ )

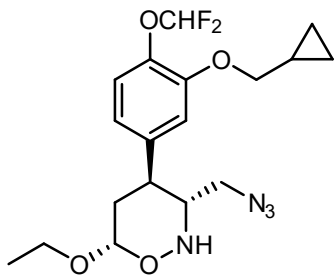

**12a**

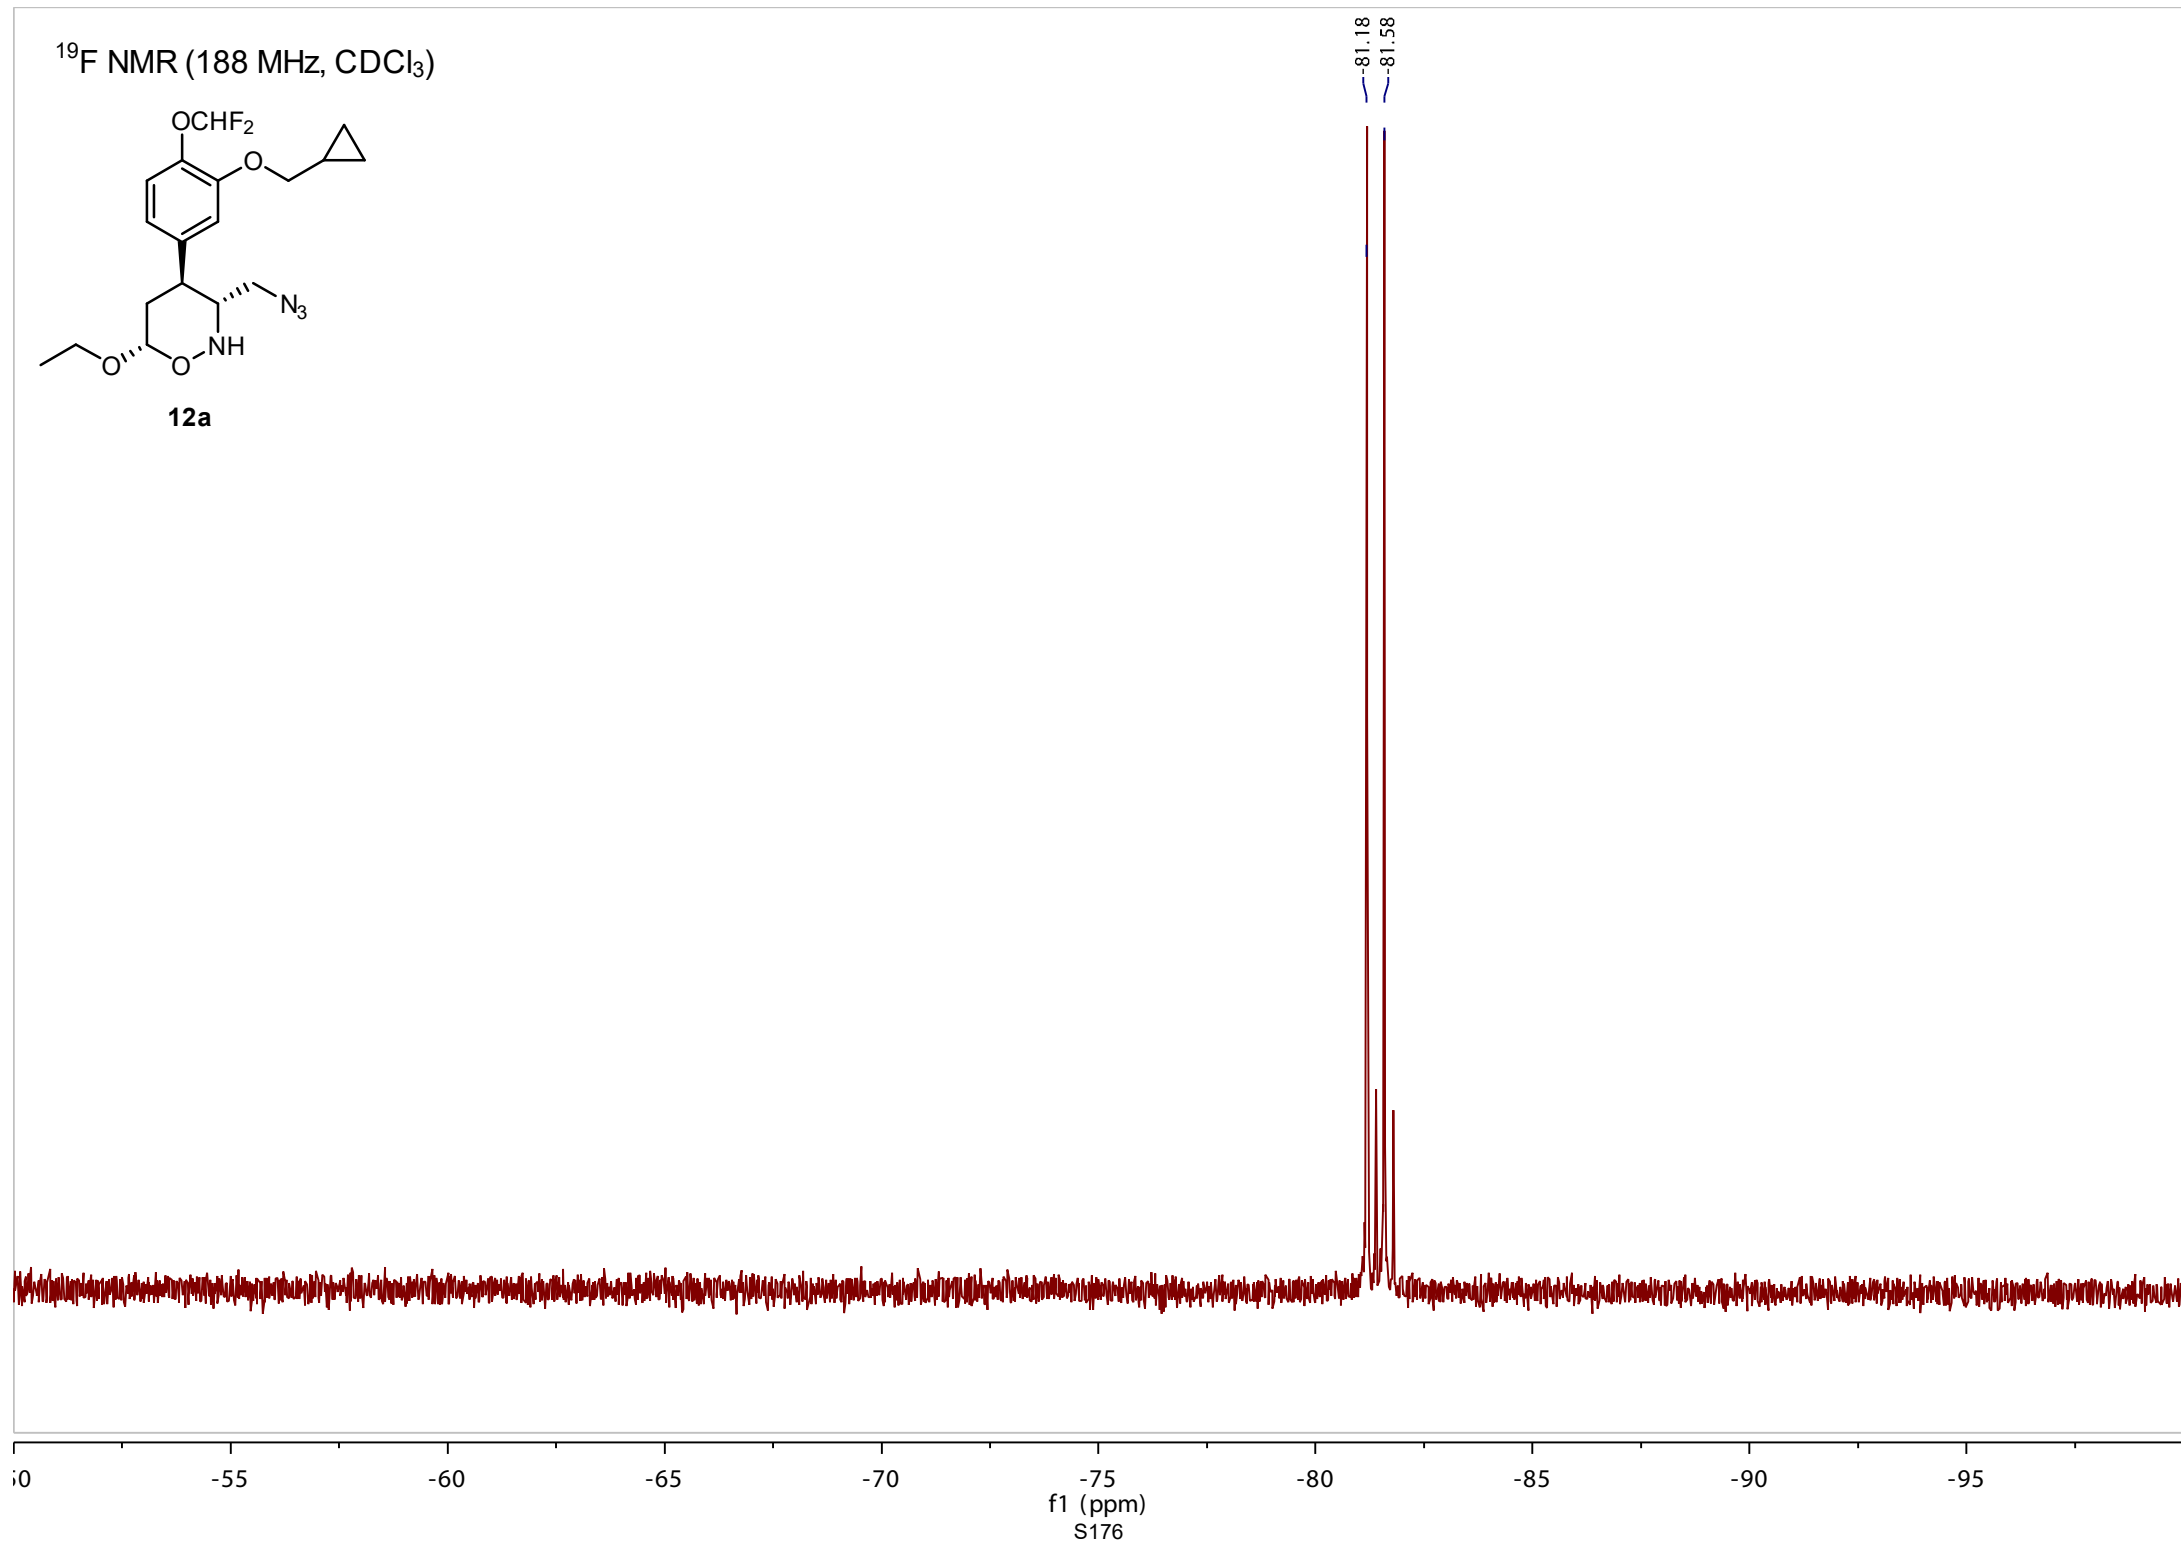



COSY NMR

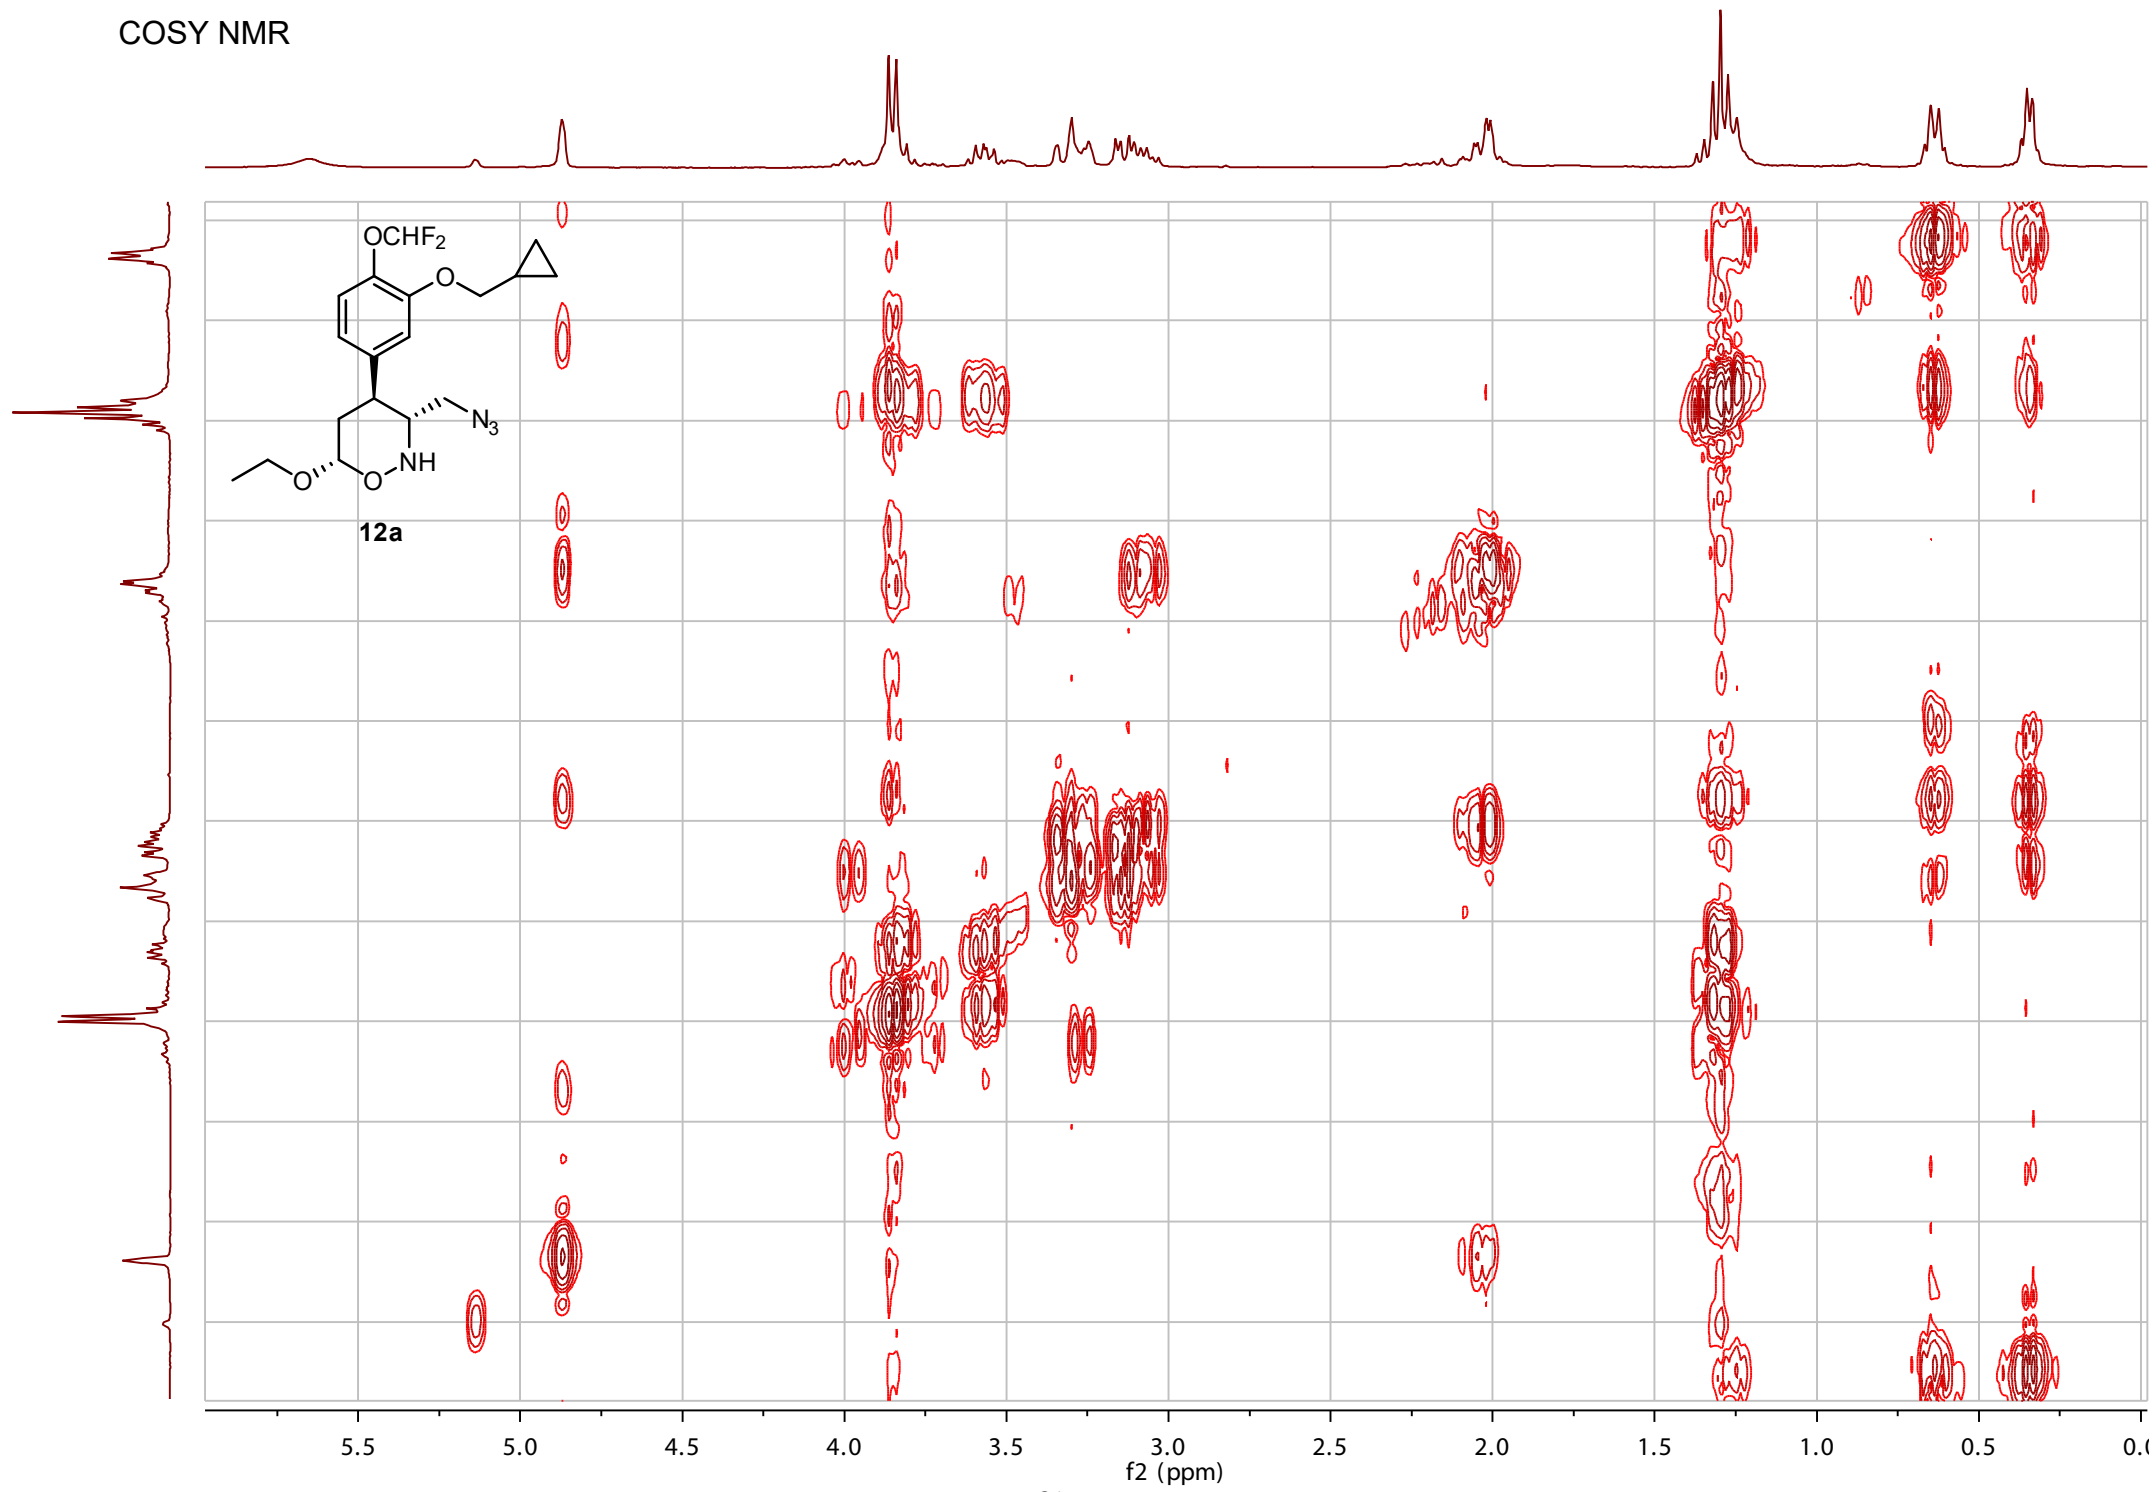

# HSQC NMR

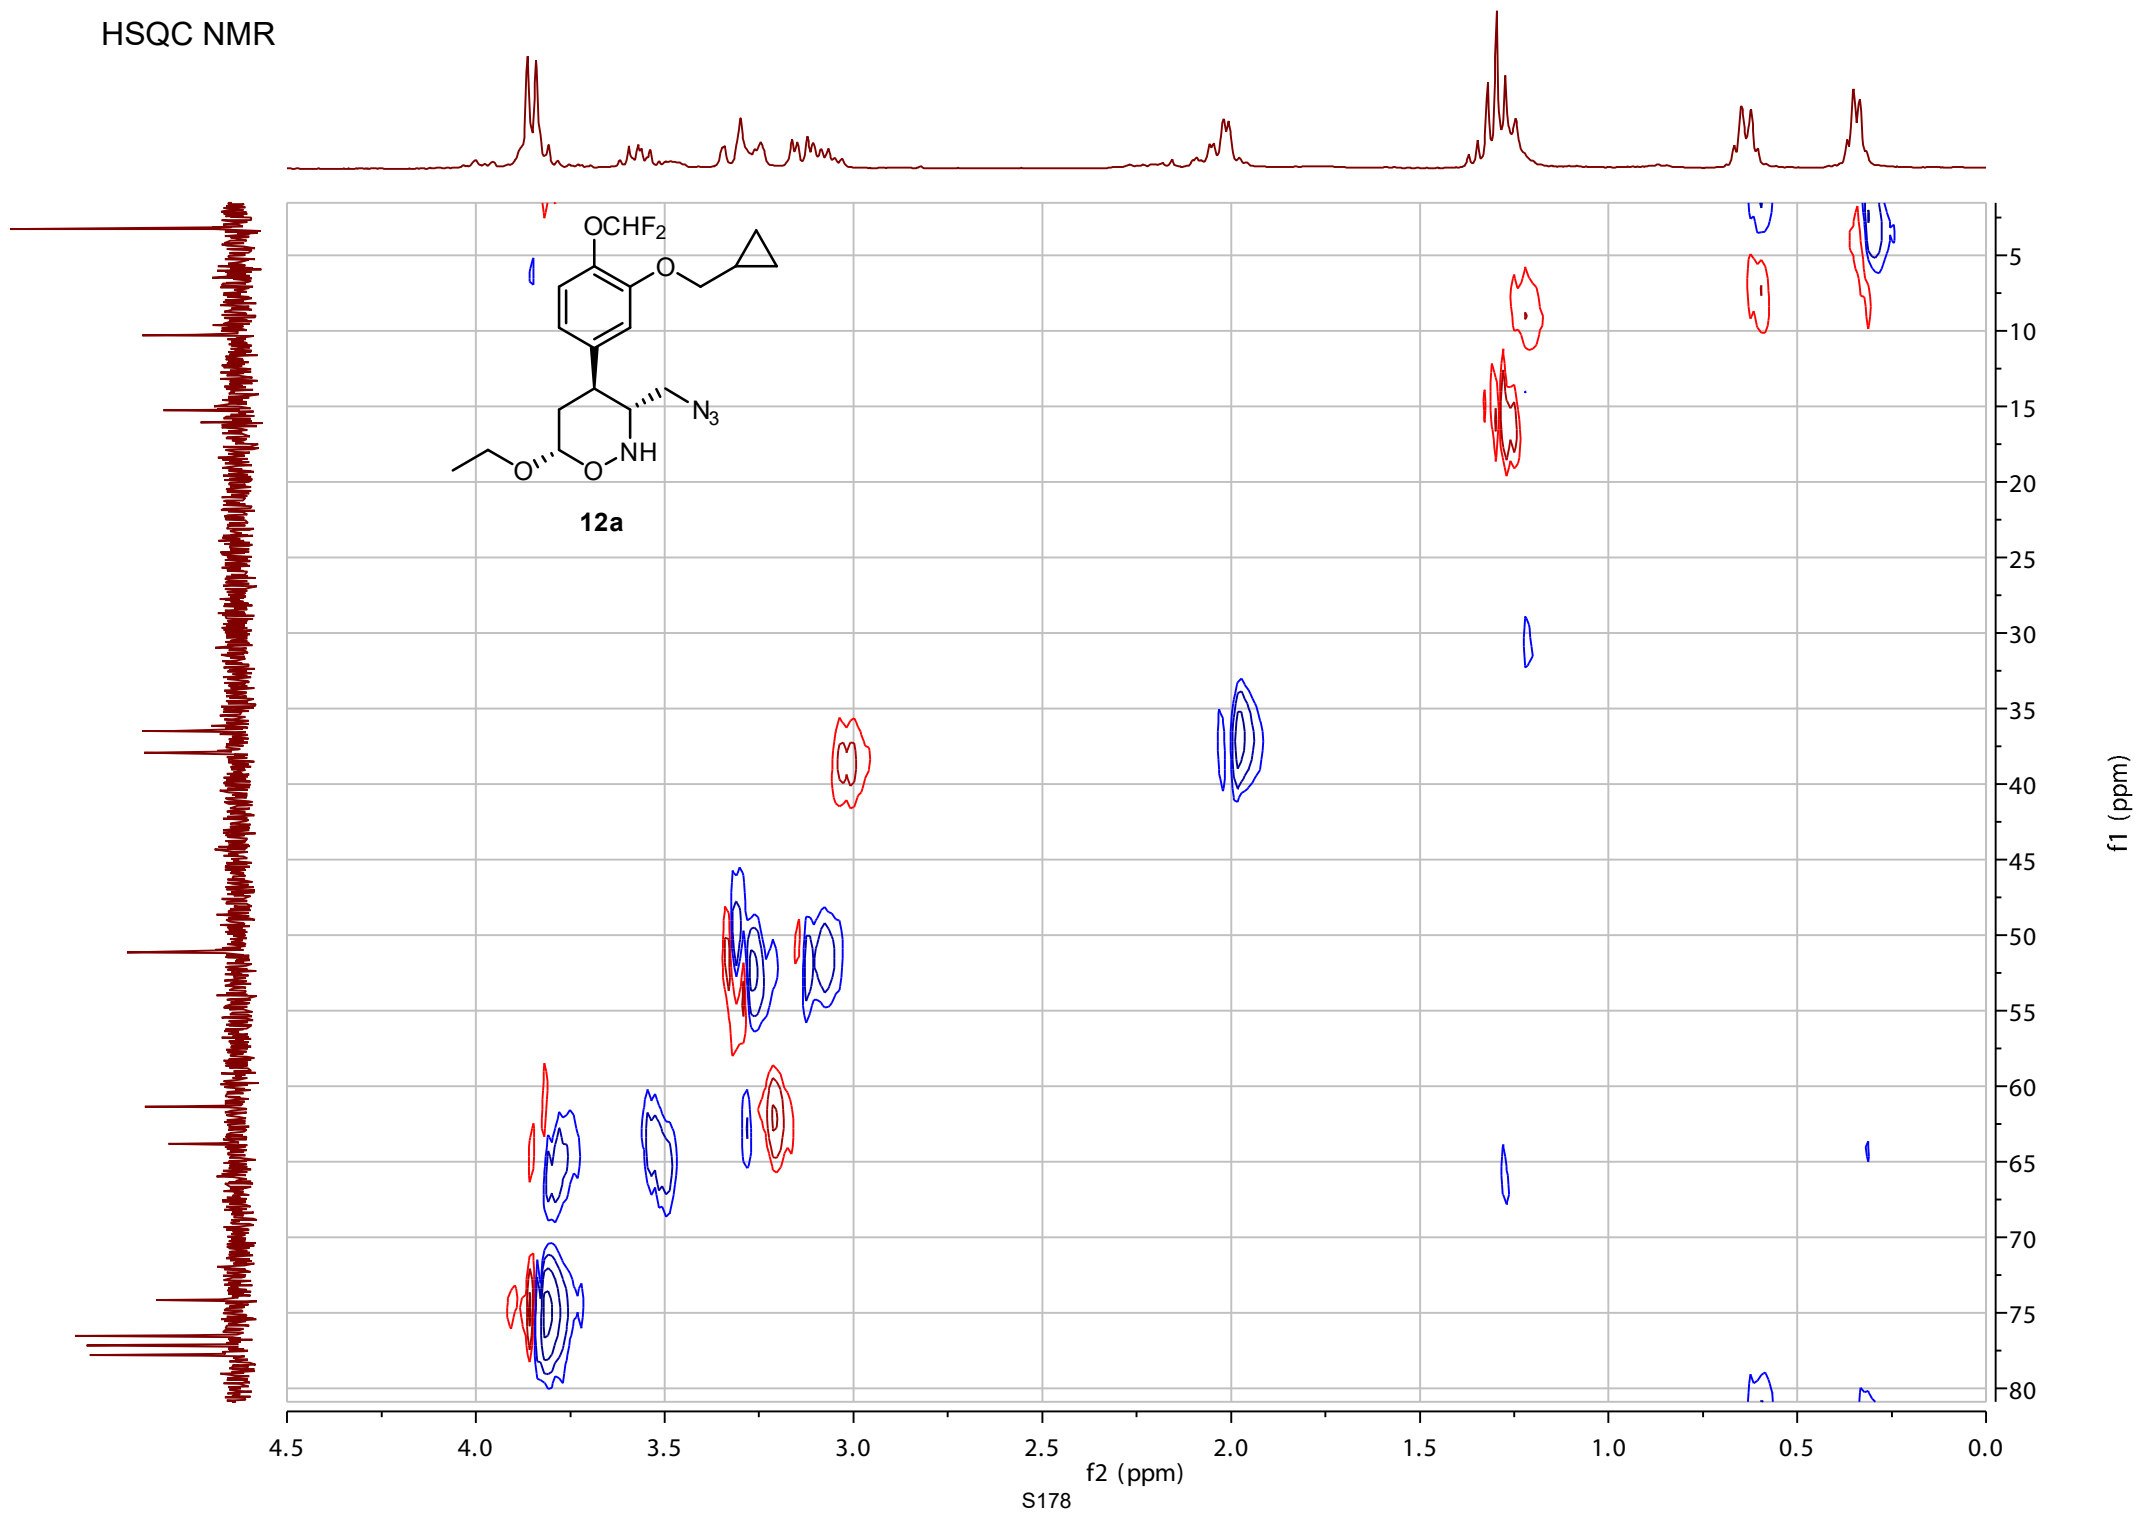

<sup>1</sup>H NMR (300 MHz, CDCl<sub>3</sub>)

7.47  
7.44  
7.39  
7.37  
7.34  
7.32  
7.30  
7.26  
6.88  
6.85  
6.77  
6.76  
6.70  
6.70  
6.68  
6.67

5.63

5.13

4.88

3.88

3.86

3.84

3.81

3.58

3.57

3.33

3.29

3.16

3.15

3.12

3.10

3.06

3.04

3.02

3.00

2.98

2.96

2.06

2.05

2.02

1.35

1.33

1.30

1.28

0.64

0.61

0.36

0.34

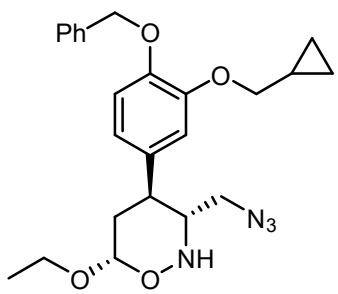

**12b**

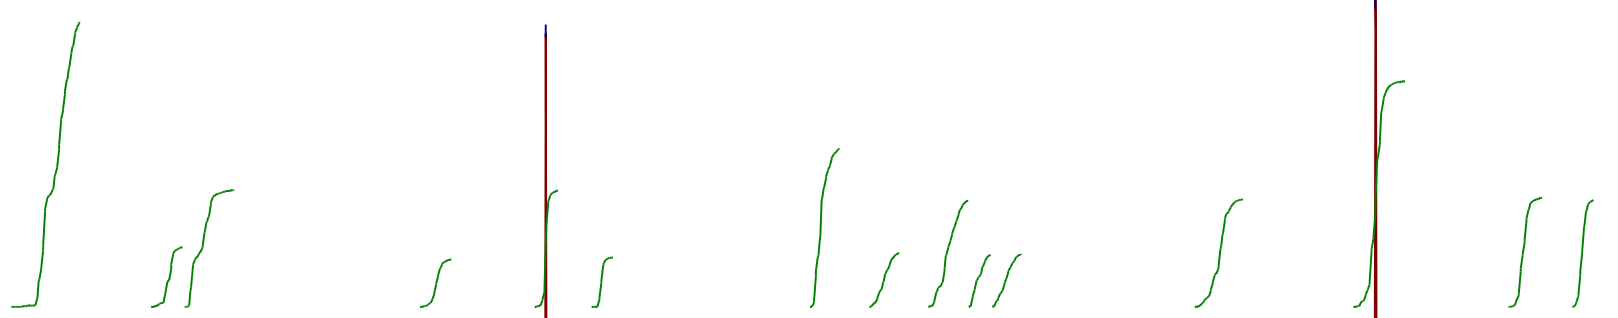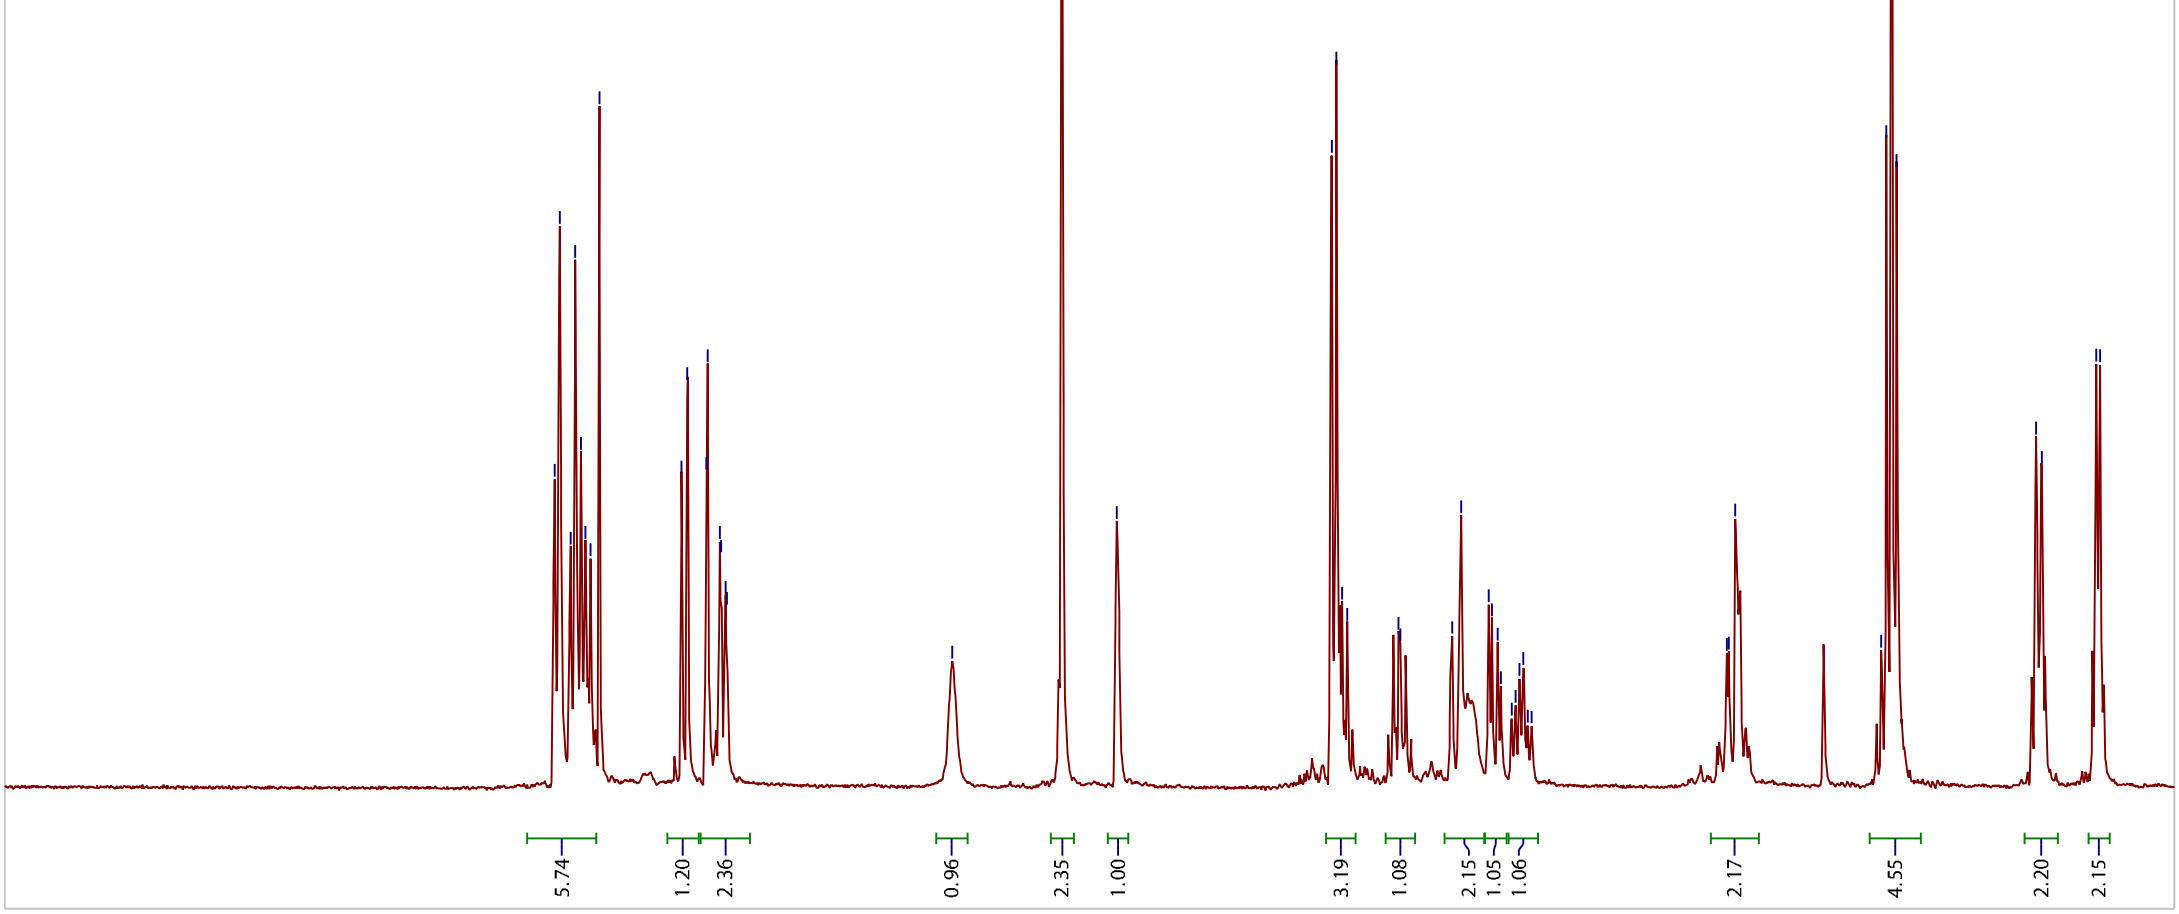

5.74

1.20

2.36

0.96

2.35

1.00

3.19

1.08

2.15

1.05

1.06

2.17

4.55

2.20

2.15

1.0 9.5 9.0 8.5 8.0 7.5 7.0 6.5 6.0 5.5 5.0 4.5 4.0 3.5 3.0 2.5 2.0 1.5 1.0 0.5 0.0

f1 (ppm)  
S179

$^{13}\text{C}$  NMR (75 MHz,  $\text{CDCl}_3$ )

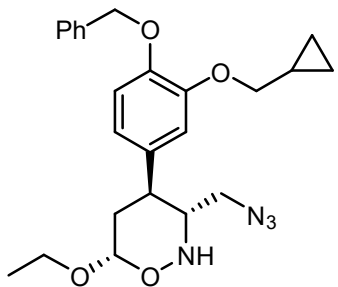

**12b**

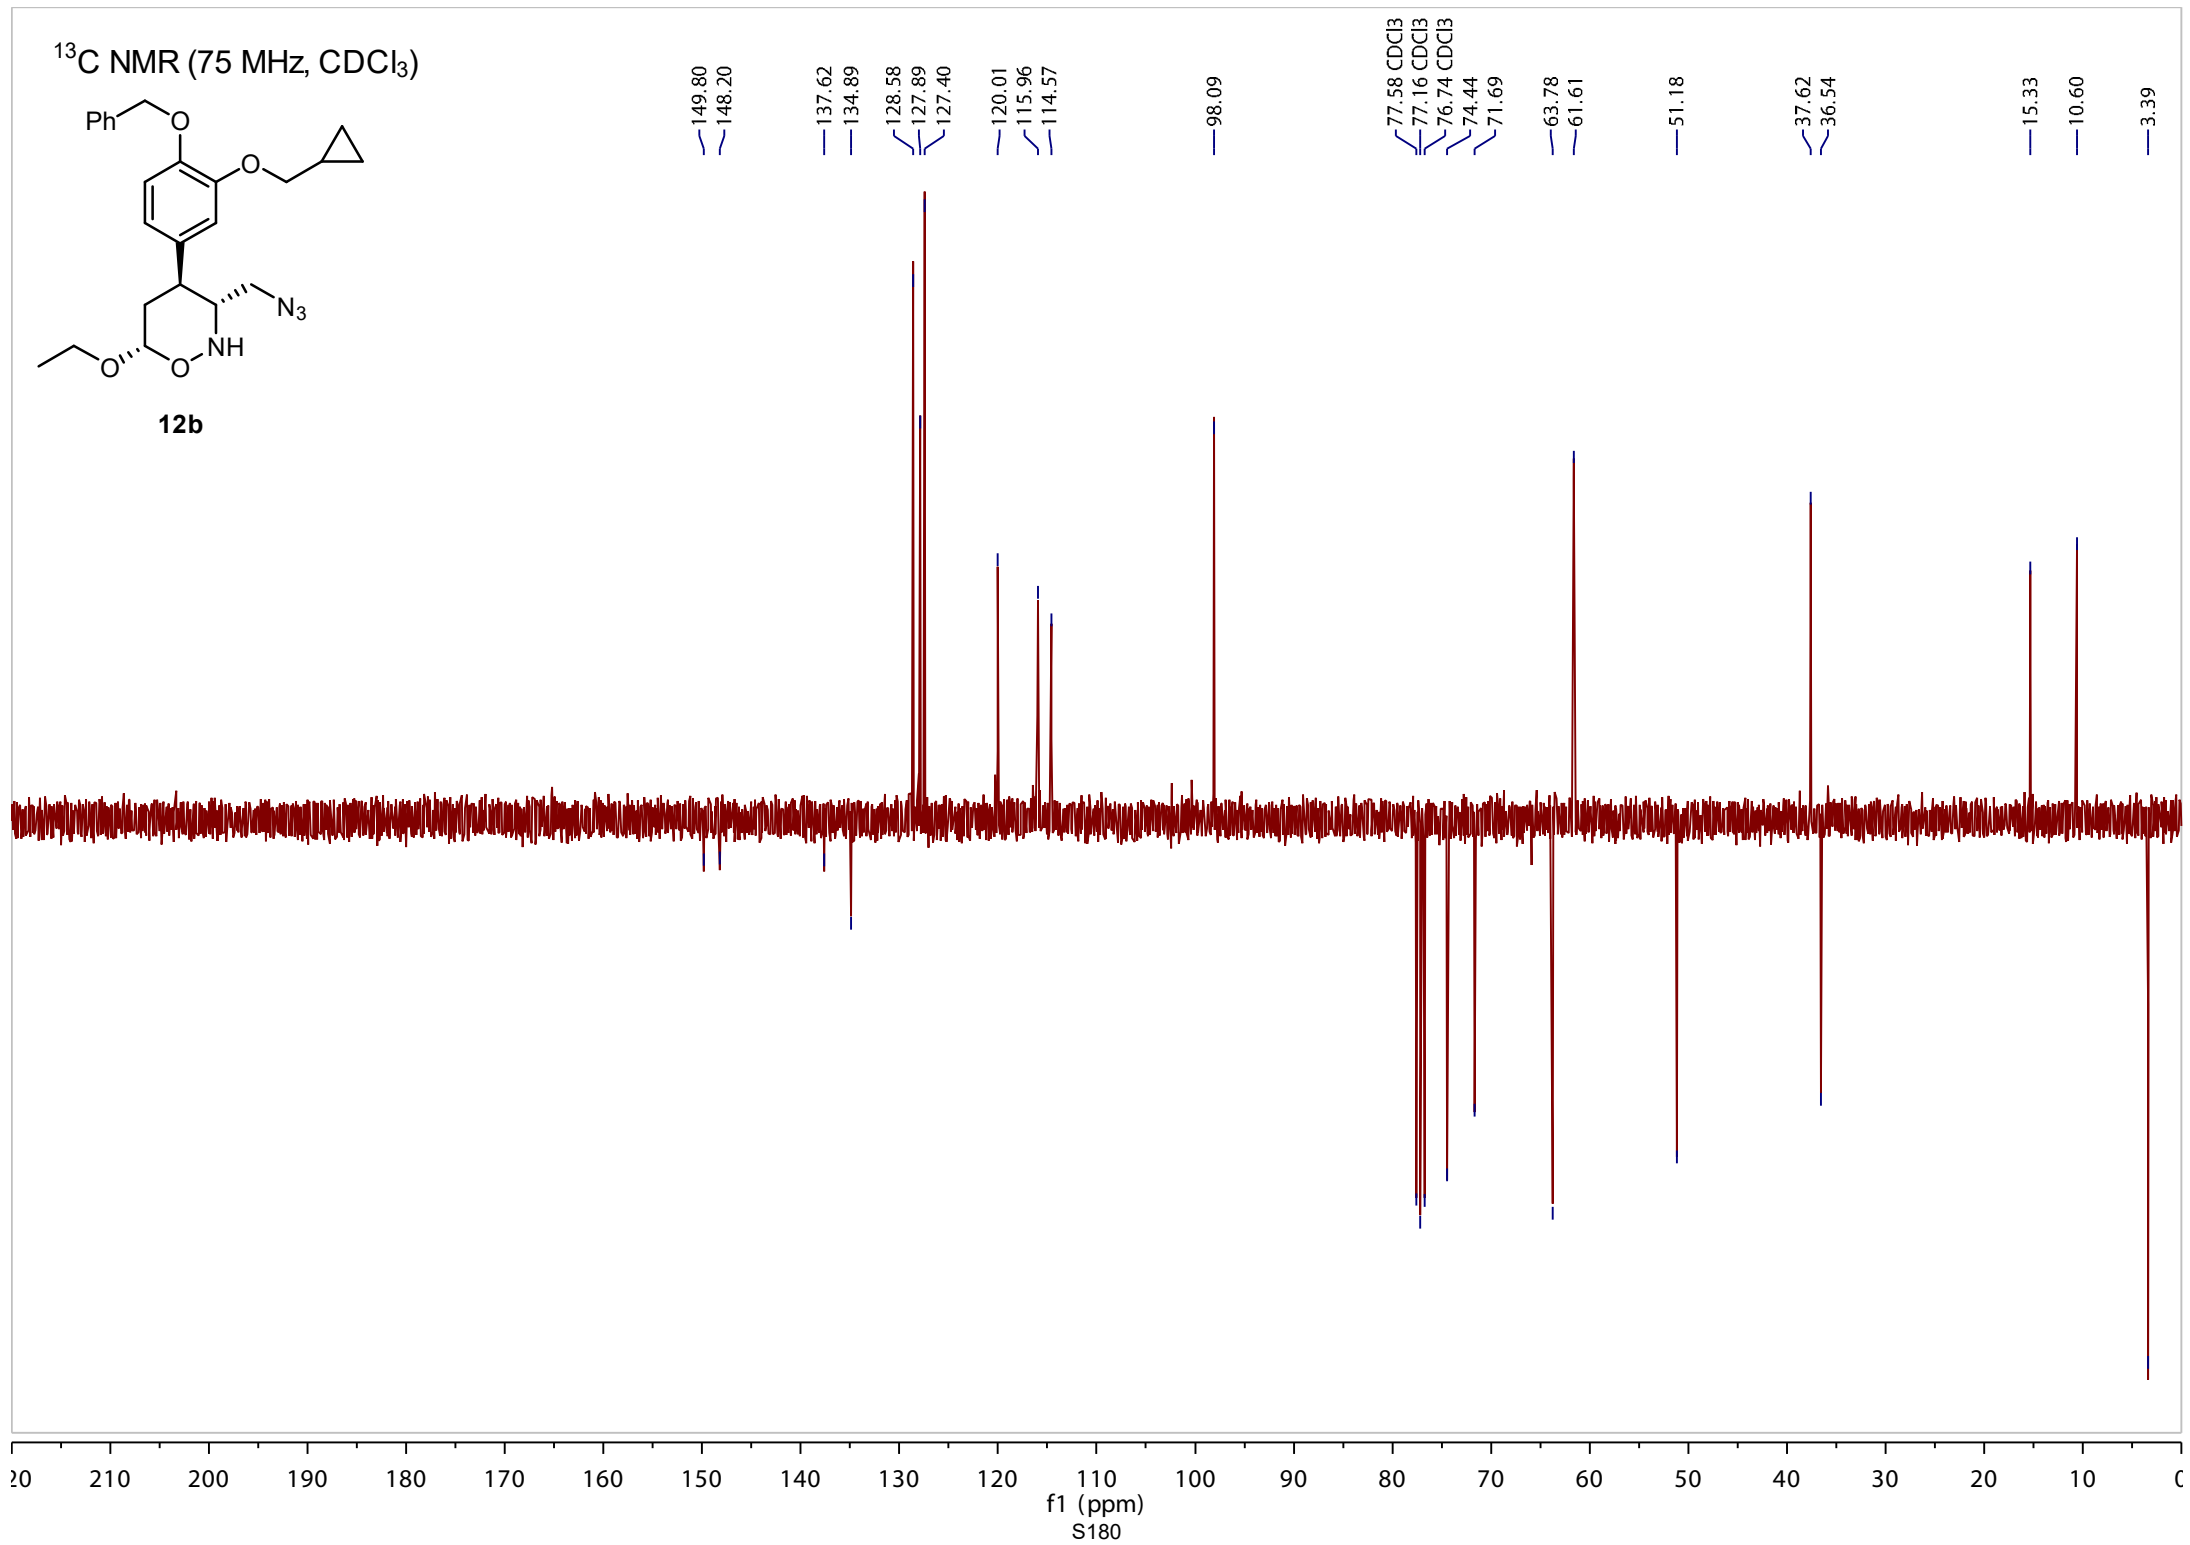

<sup>1</sup>H NMR (300 MHz, CDCl<sub>3</sub>)

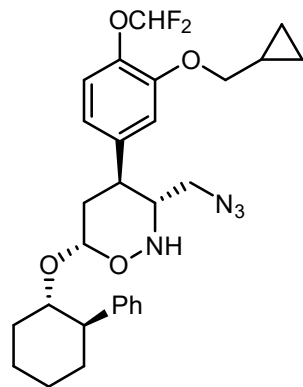

**12c**

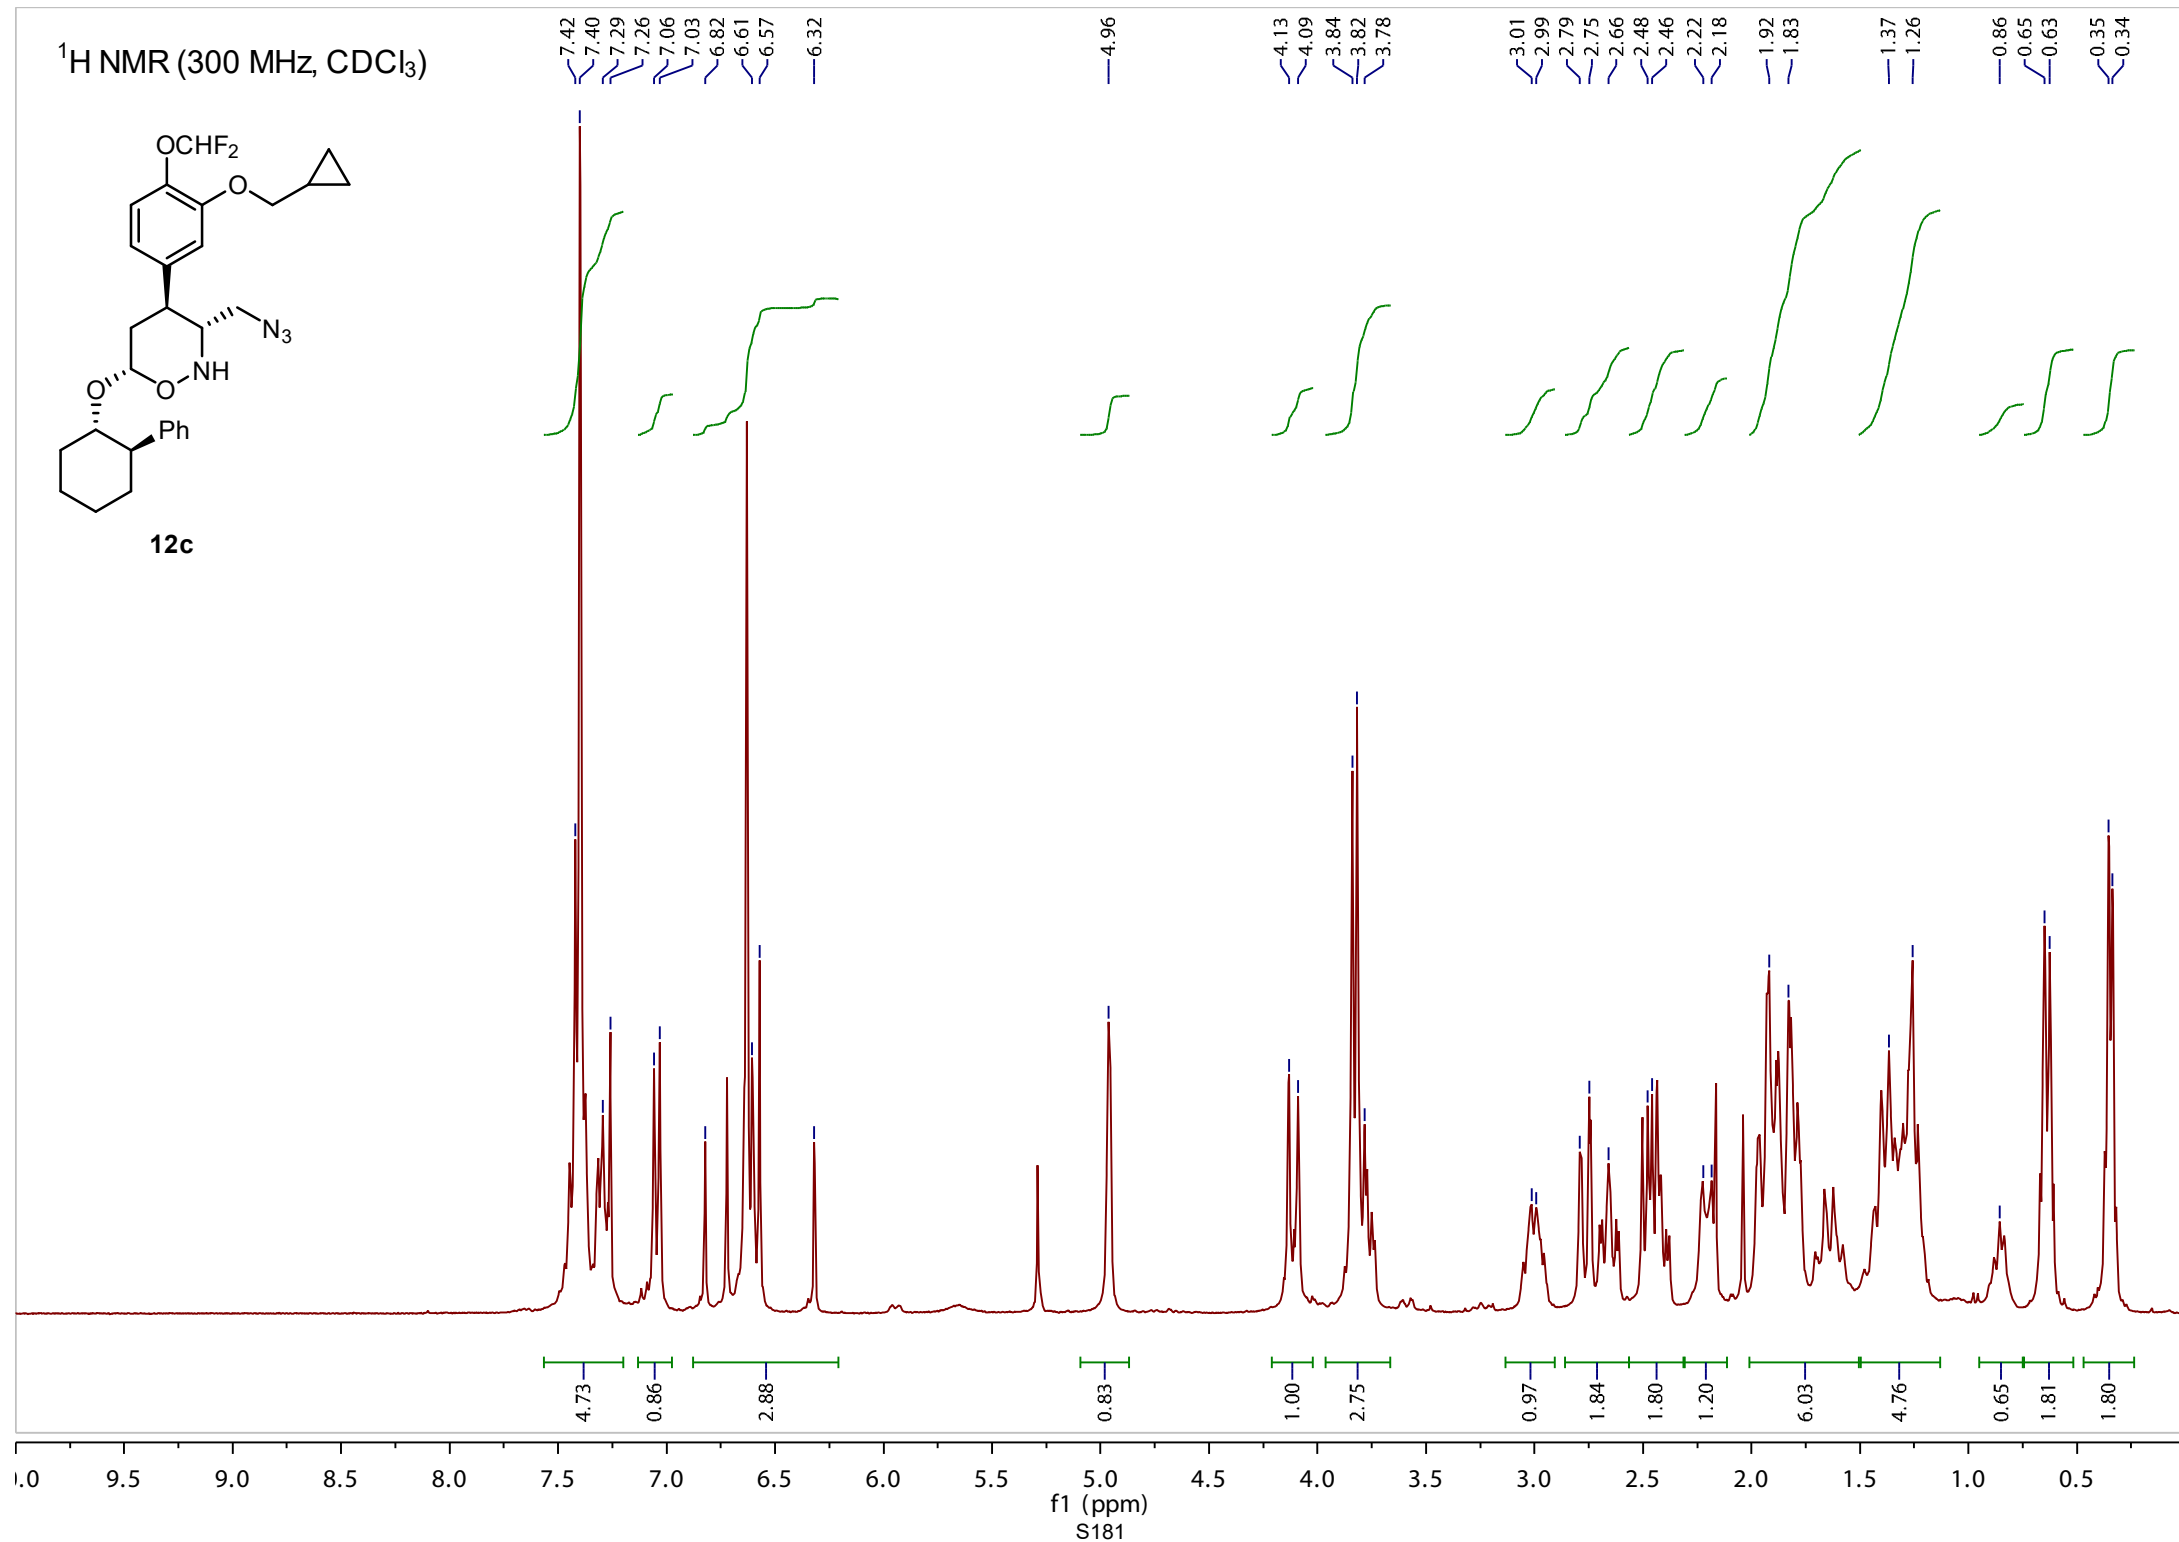

<sup>13</sup>C NMR (75 MHz, CDCl<sub>3</sub>)

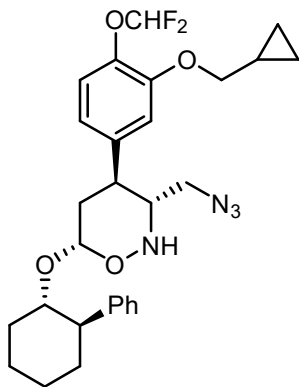

**12c**

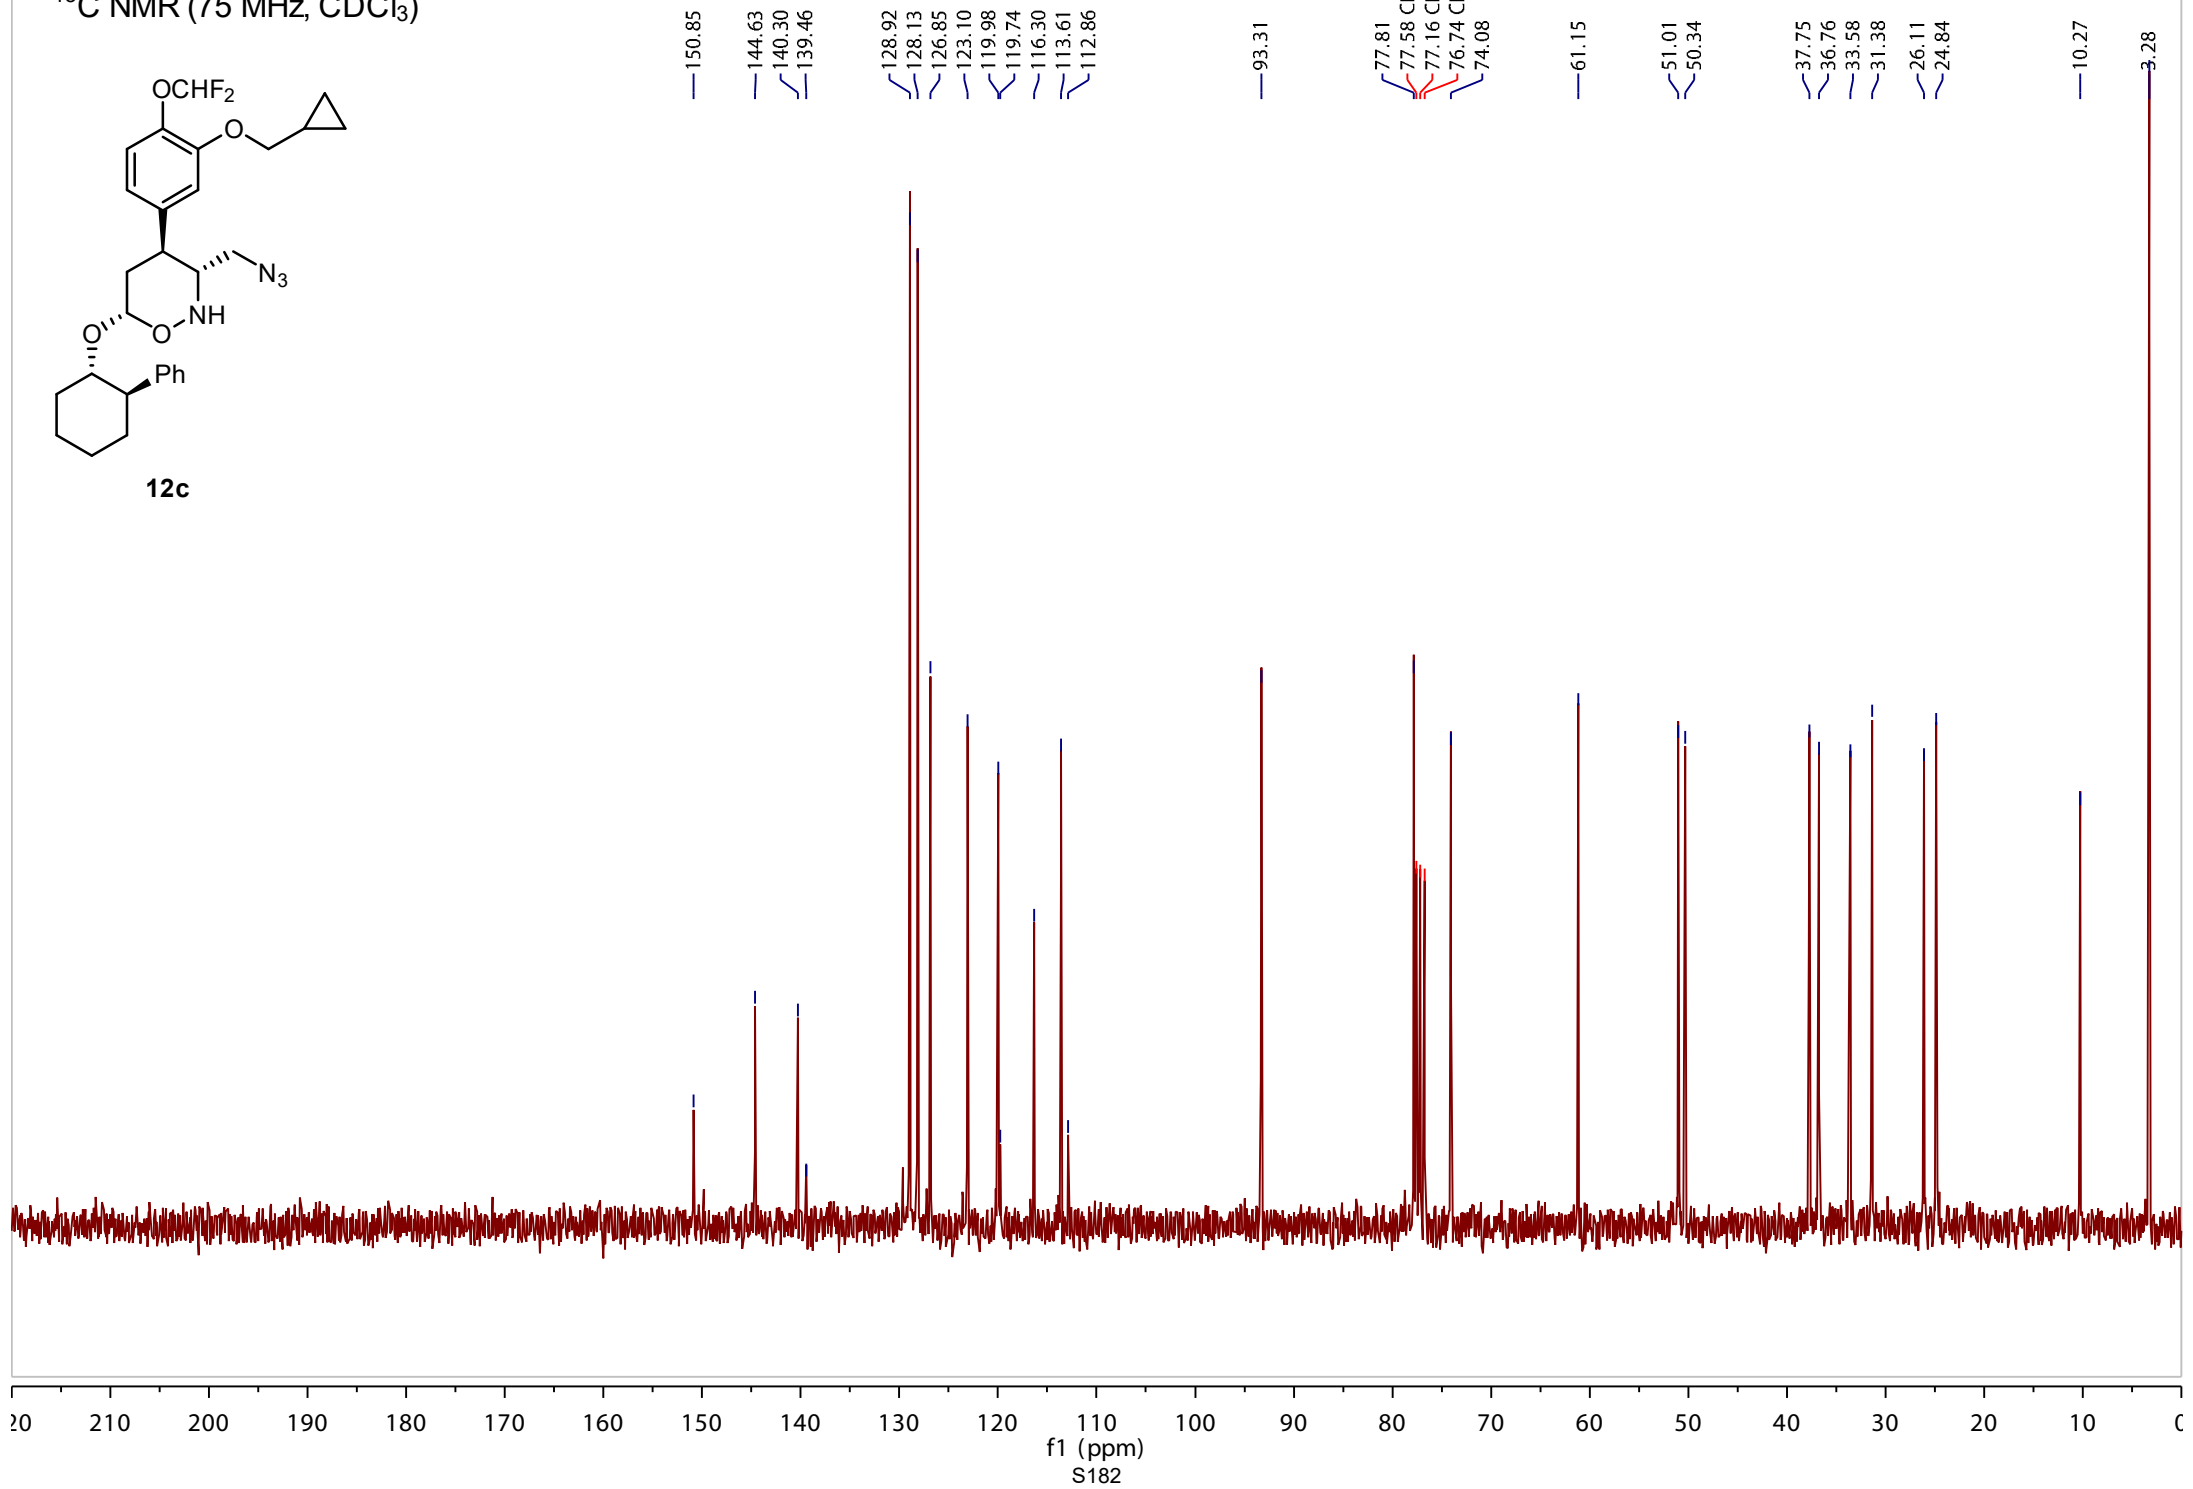

$^{19}\text{F}$  NMR (282 MHz,  $\text{CDCl}_3$ )

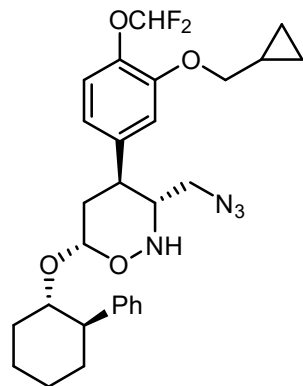

**12c**

82.24  
82.50

10 -55 -60 -65 -70 -75 -80 -85 -90 -95 -100  
f1 (ppm)  
S183

COSY NMR

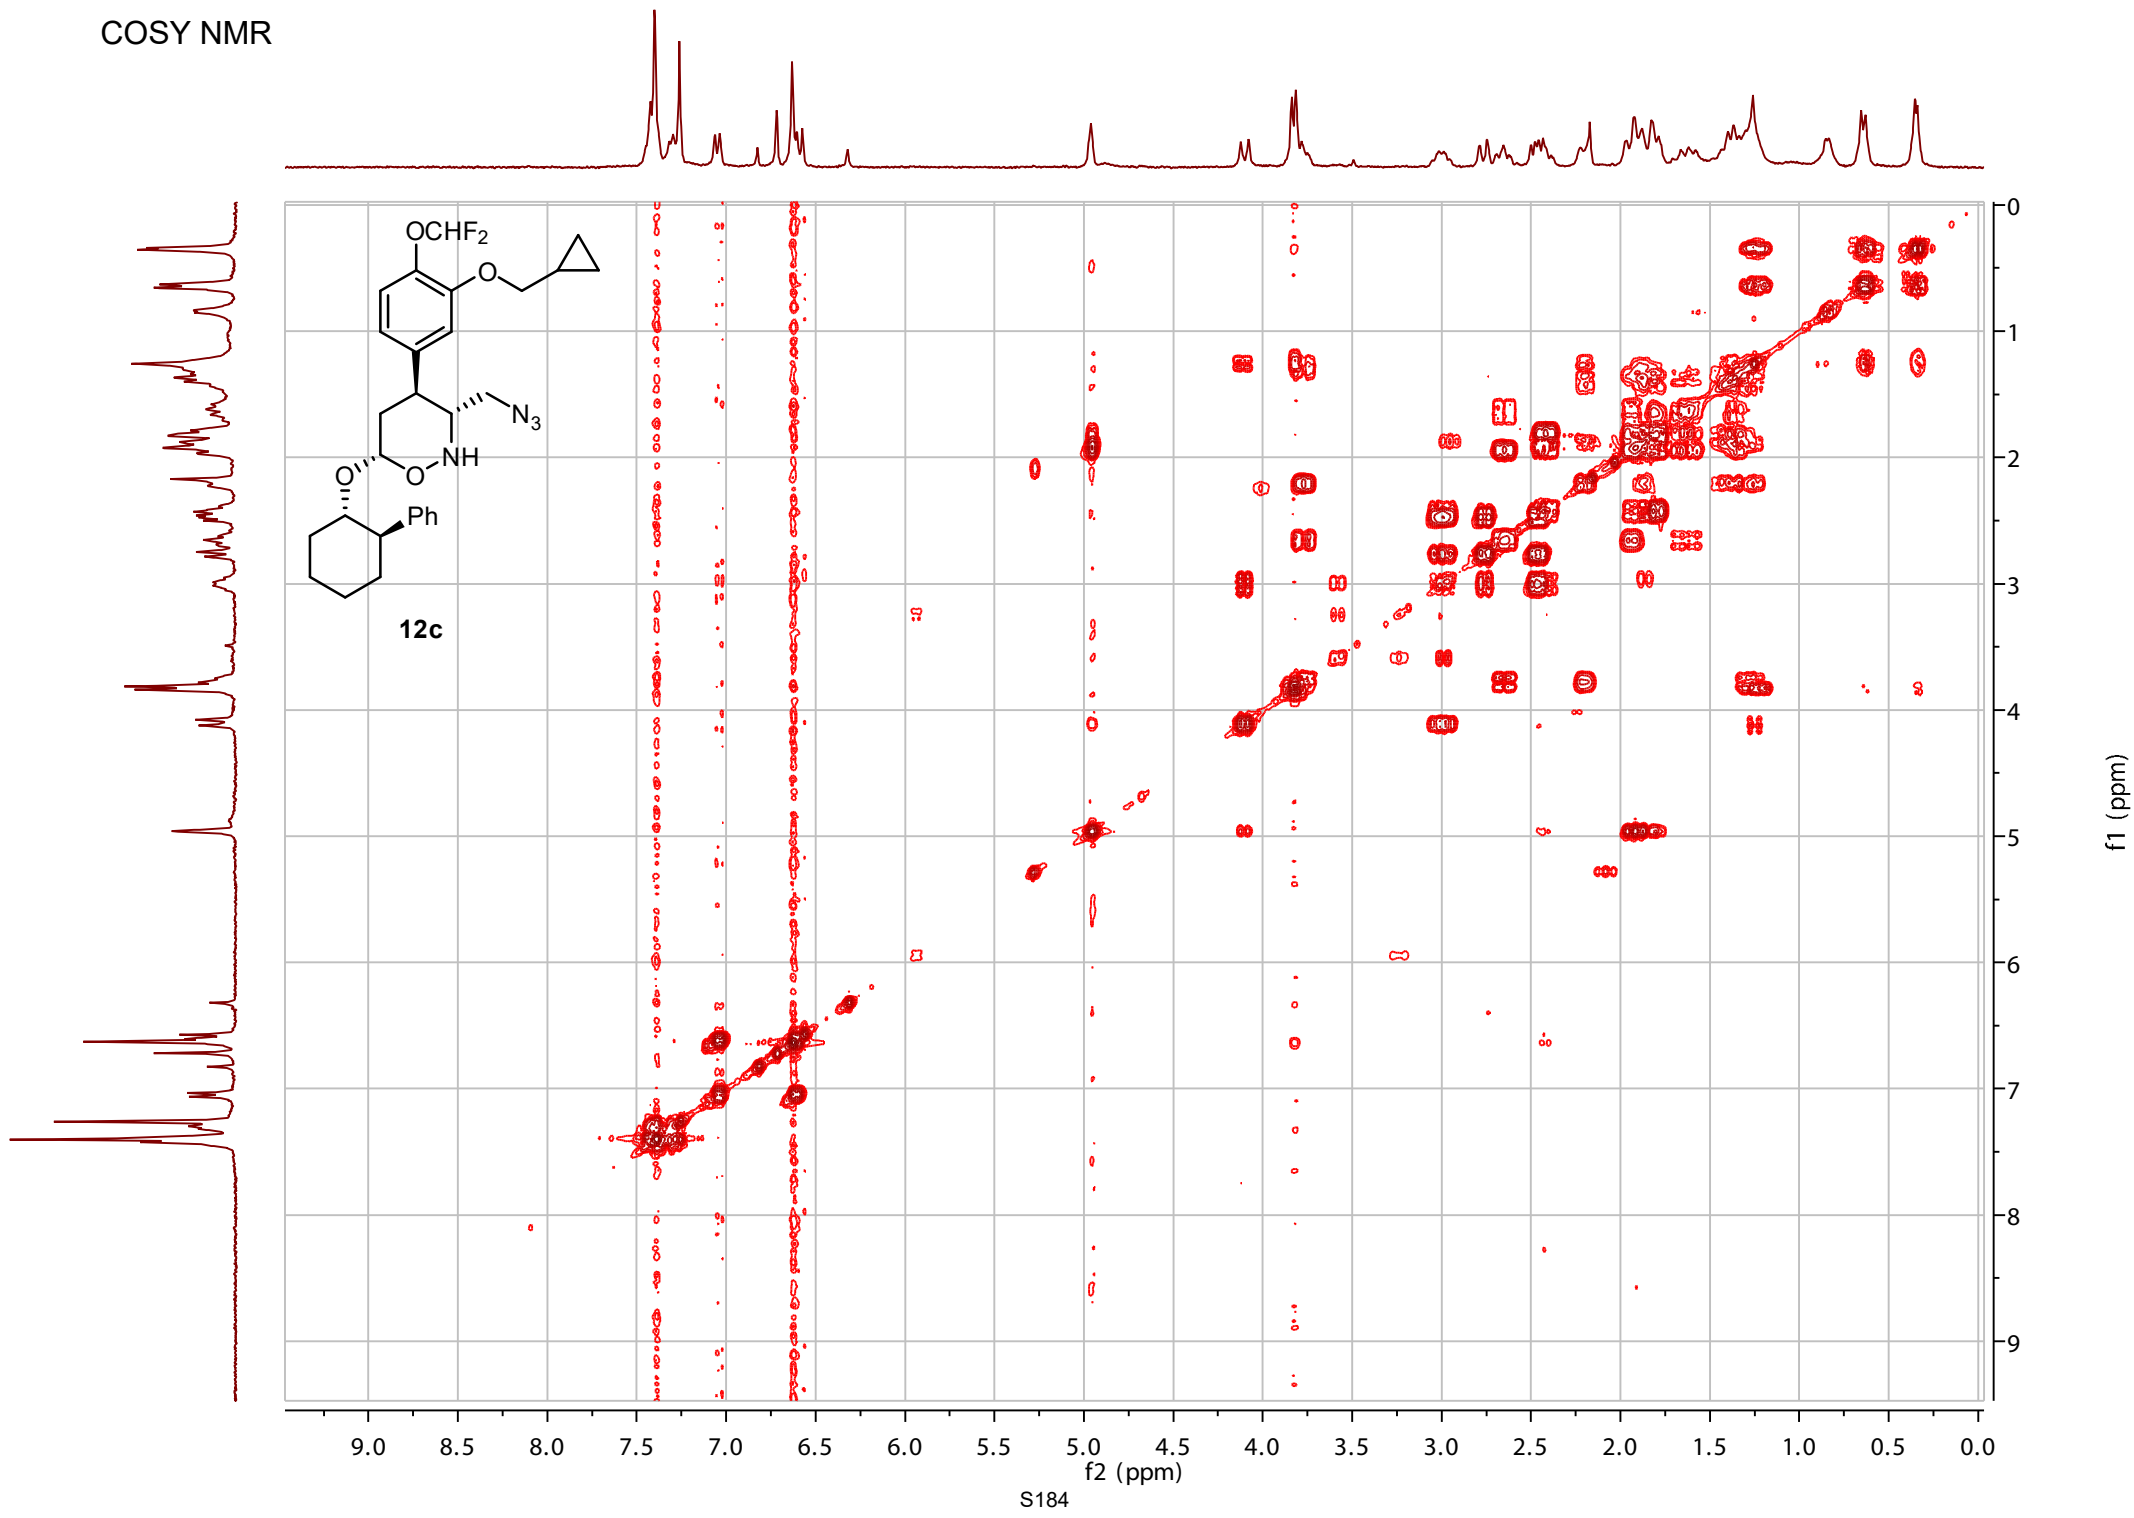



# HSQC NMR

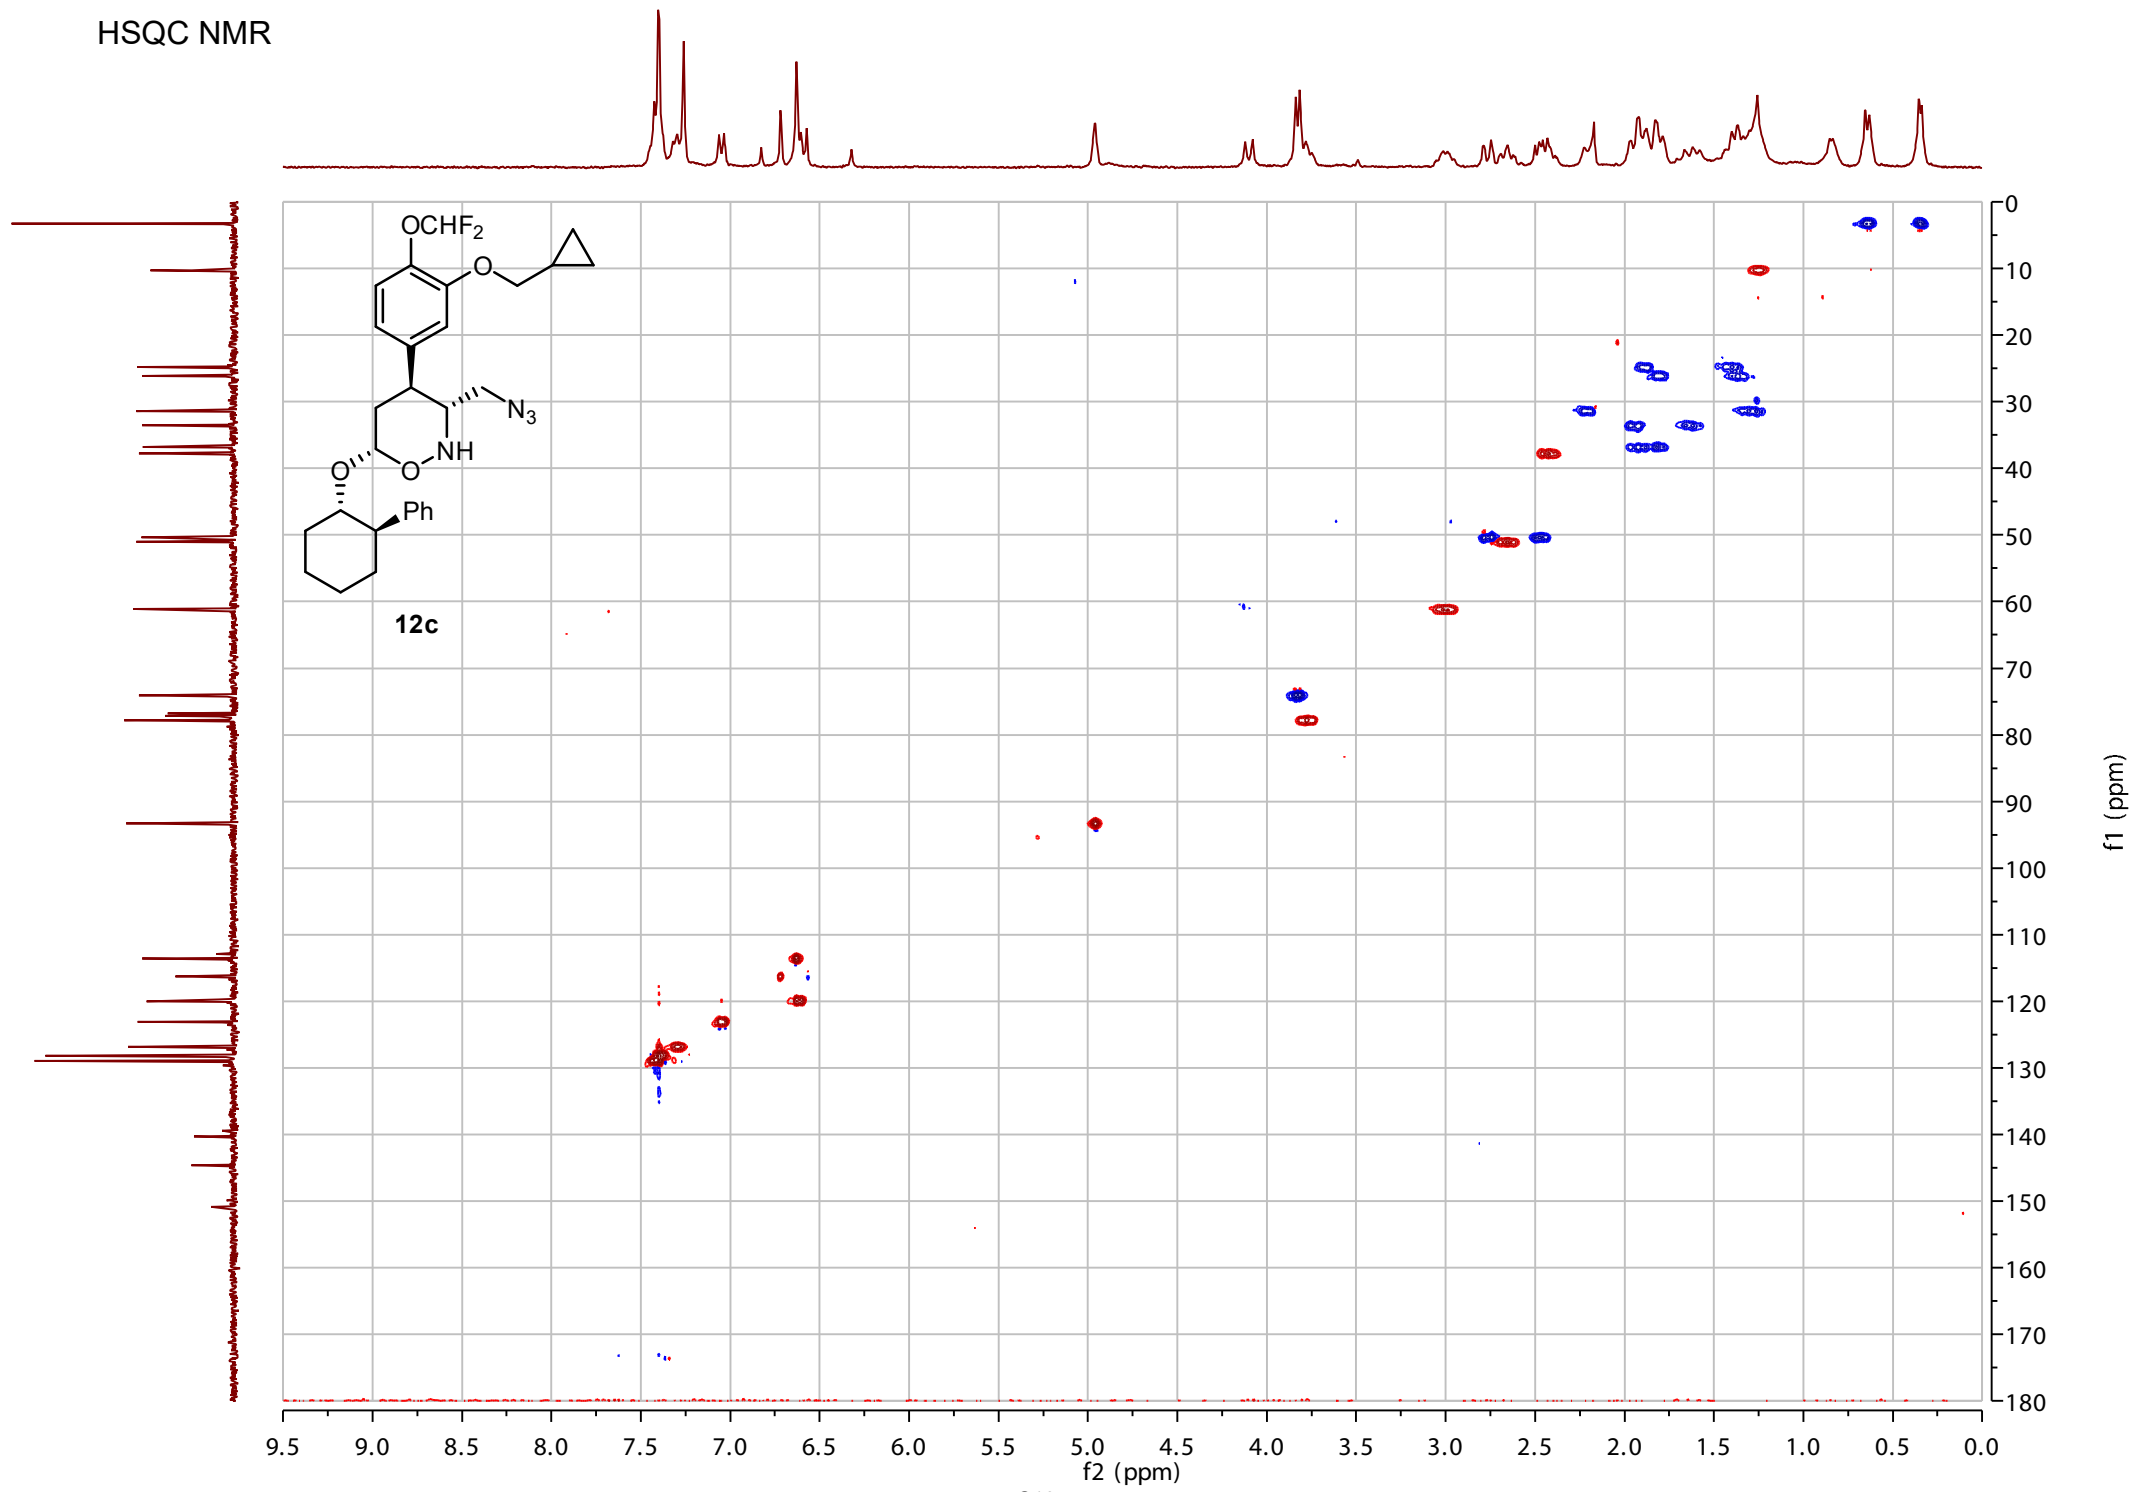

<sup>1</sup>H NMR (300 MHz, CDCl<sub>3</sub>)

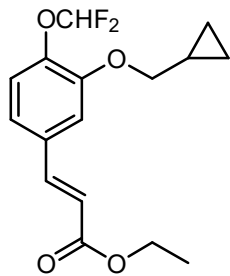

**14a**

7.58  
7.53  
7.12  
7.10  
7.05  
7.03  
6.89  
6.64  
6.39  
6.35  
6.30

4.25  
4.23  
4.21  
4.18  
3.87  
3.84

1.32  
1.30  
1.27  
1.23

0.63  
0.61  
0.34  
0.32

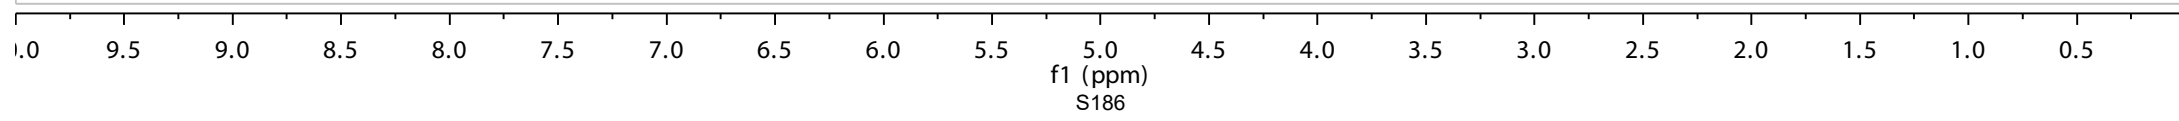

<sup>13</sup>C NMR (75 MHz, CDCl<sub>3</sub>)



**14a**

166.65  
150.65  
143.44  
143.44  
141.89  
132.98  
122.58  
122.58  
121.40  
121.40  
119.49  
118.63  
118.63  
116.05  
113.21  
112.60

77.16  
73.94

60.55

14.26  
14.26  
10.08  
10.08

3.19

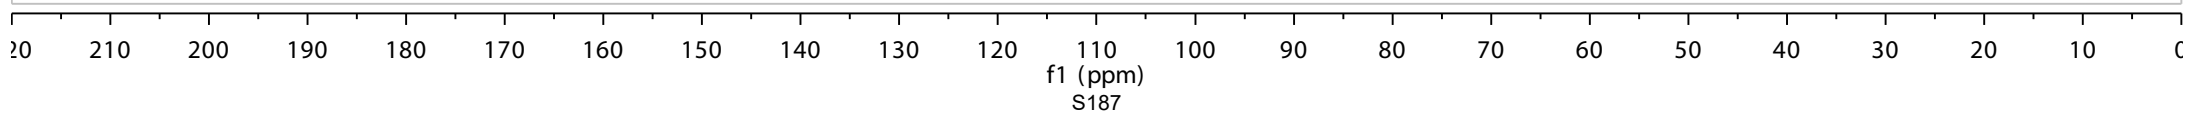

$^{19}\text{F}$  NMR (282 MHz,  $\text{CDCl}_3$ )

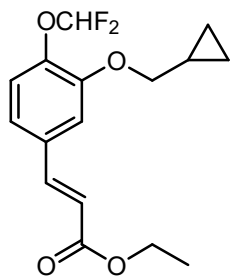

**14a**

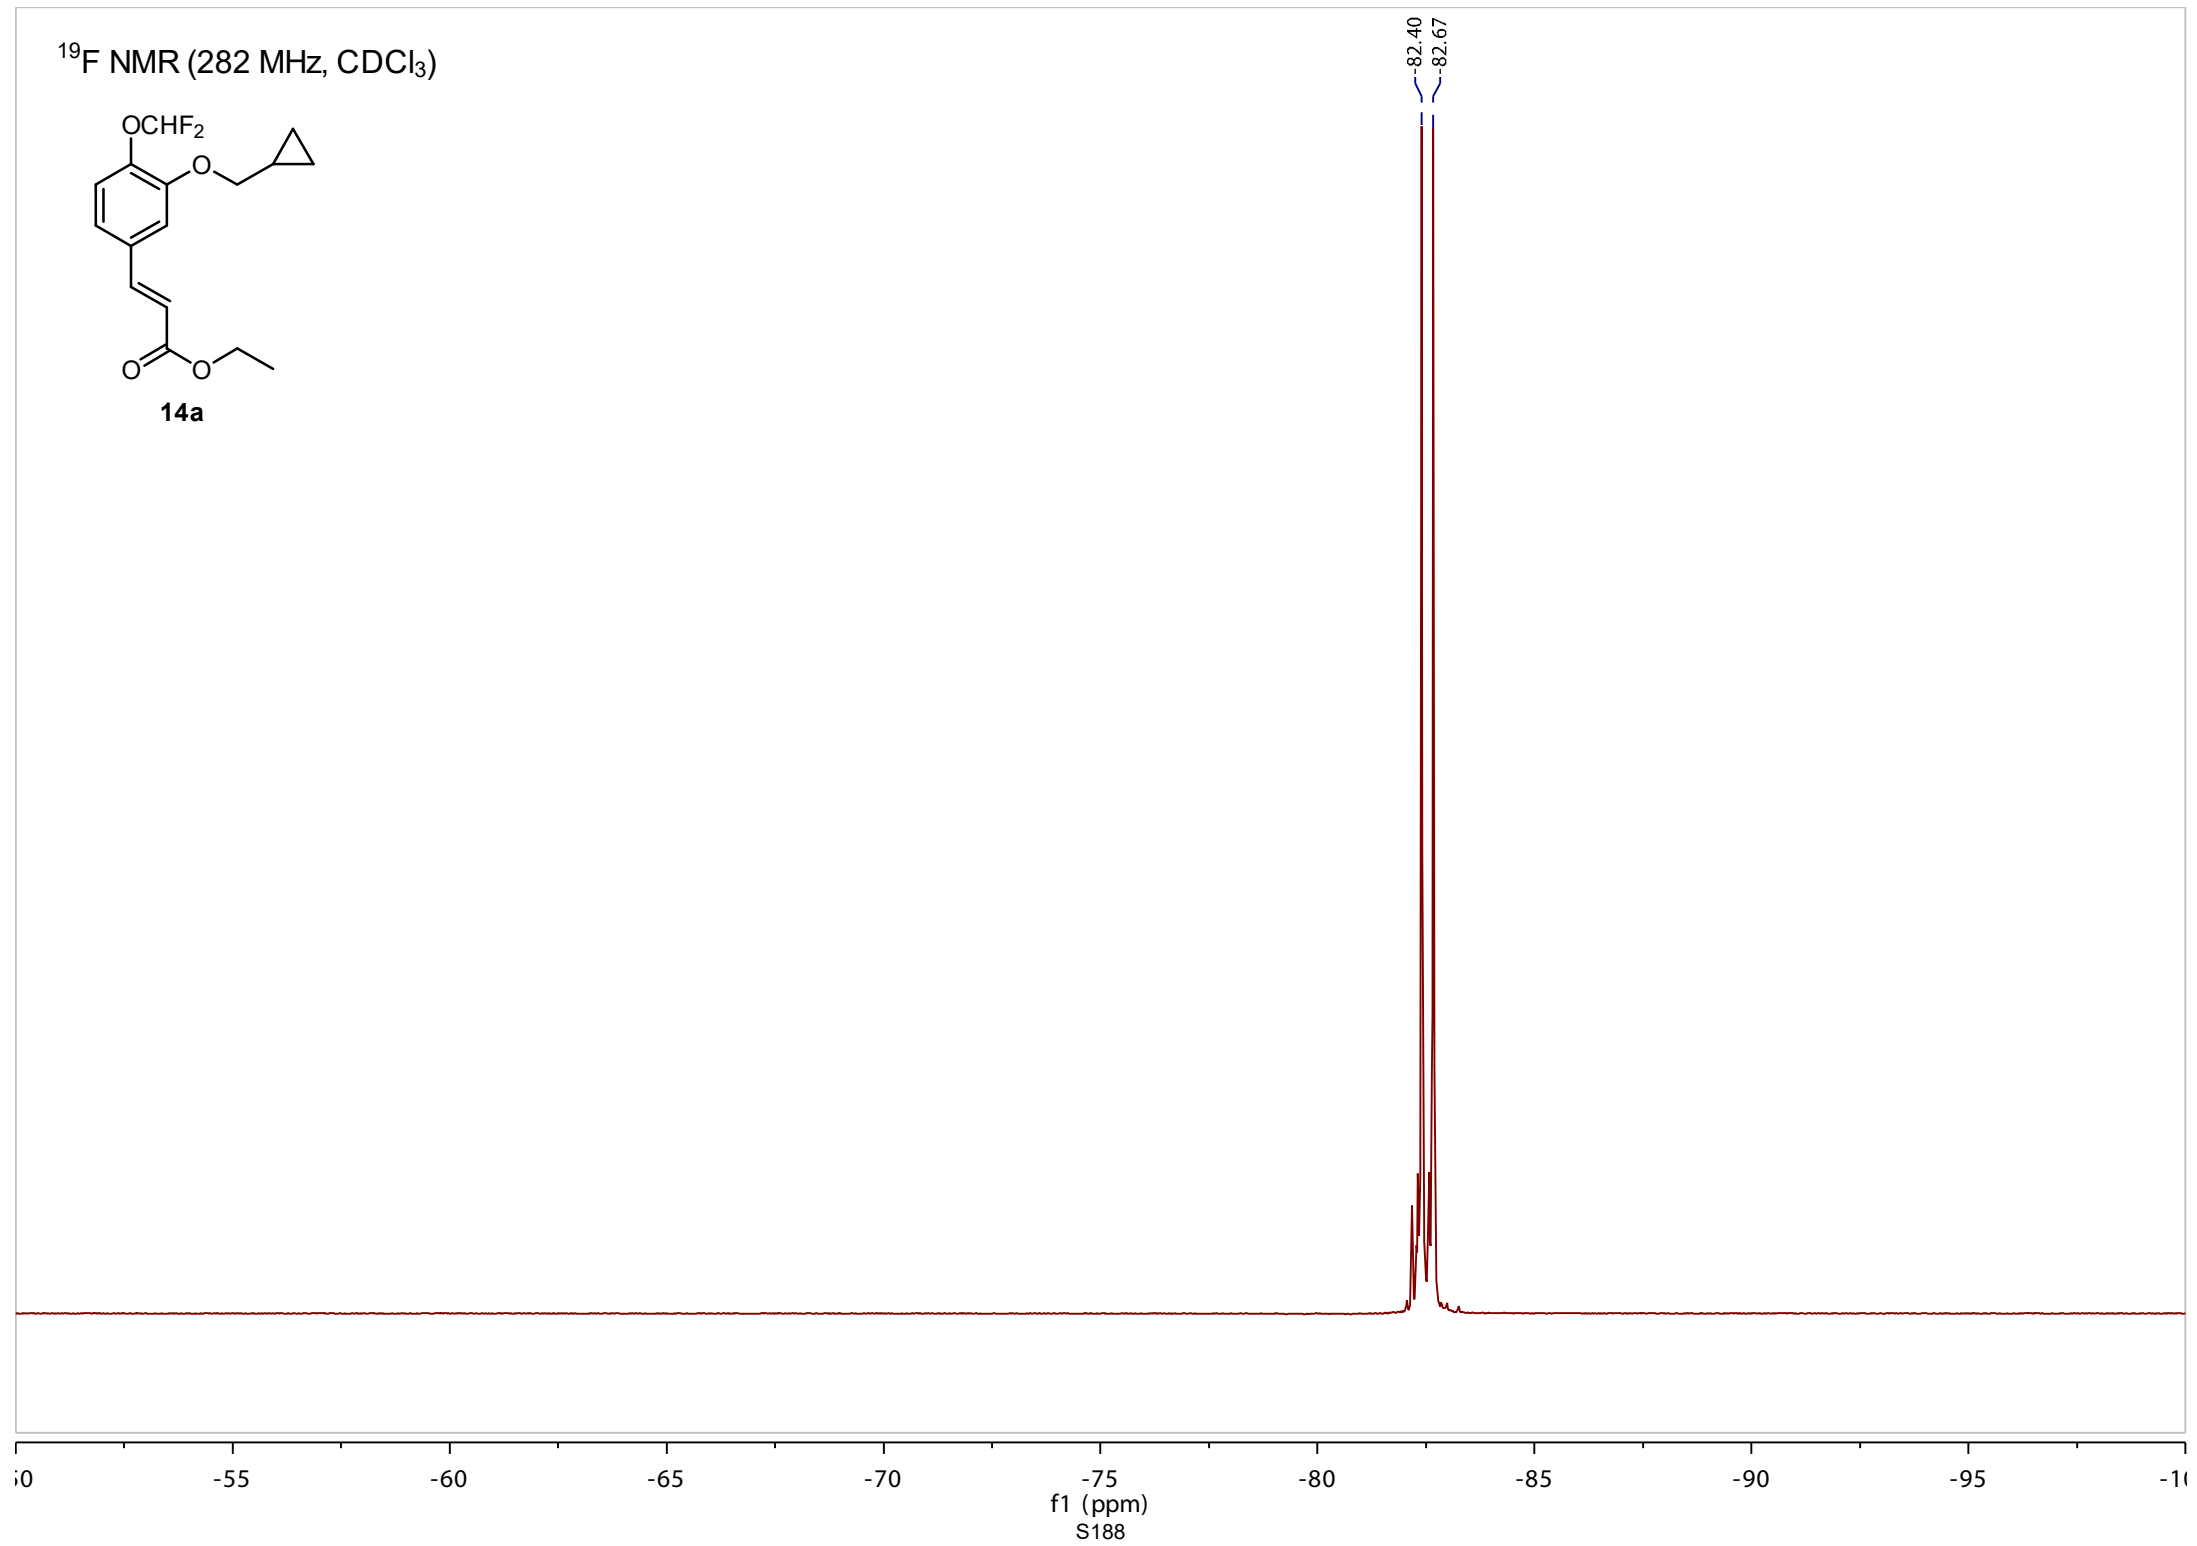

<sup>1</sup>H NMR (300 MHz, CDCl<sub>3</sub>)

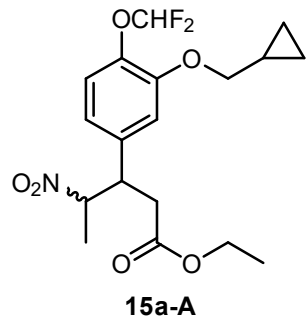

7.26  
7.05  
7.02  
6.81  
6.76  
6.73  
6.70  
6.56  
6.31

4.73  
4.72

3.93  
3.90  
3.82  
3.80  
3.60  
3.58

2.67  
2.64  
2.61  
2.60

1.29  
1.27  
1.19  
1.04  
1.02  
0.99

0.57  
0.54  
0.29  
0.27

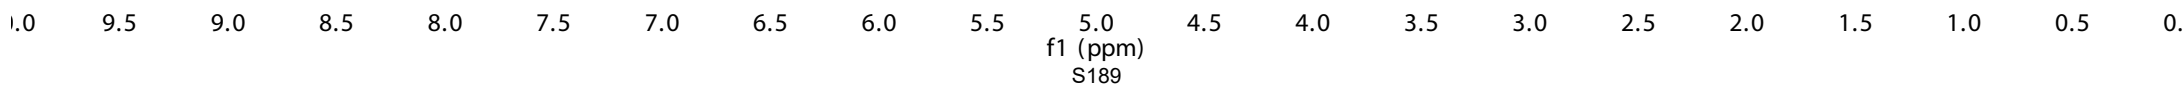

f1 (ppm)  
S189

<sup>13</sup>C NMR (75 MHz, CDCl<sub>3</sub>)

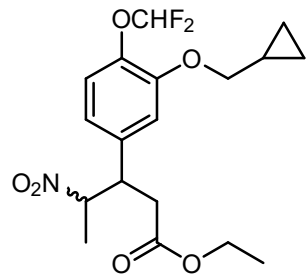

**15a-A**

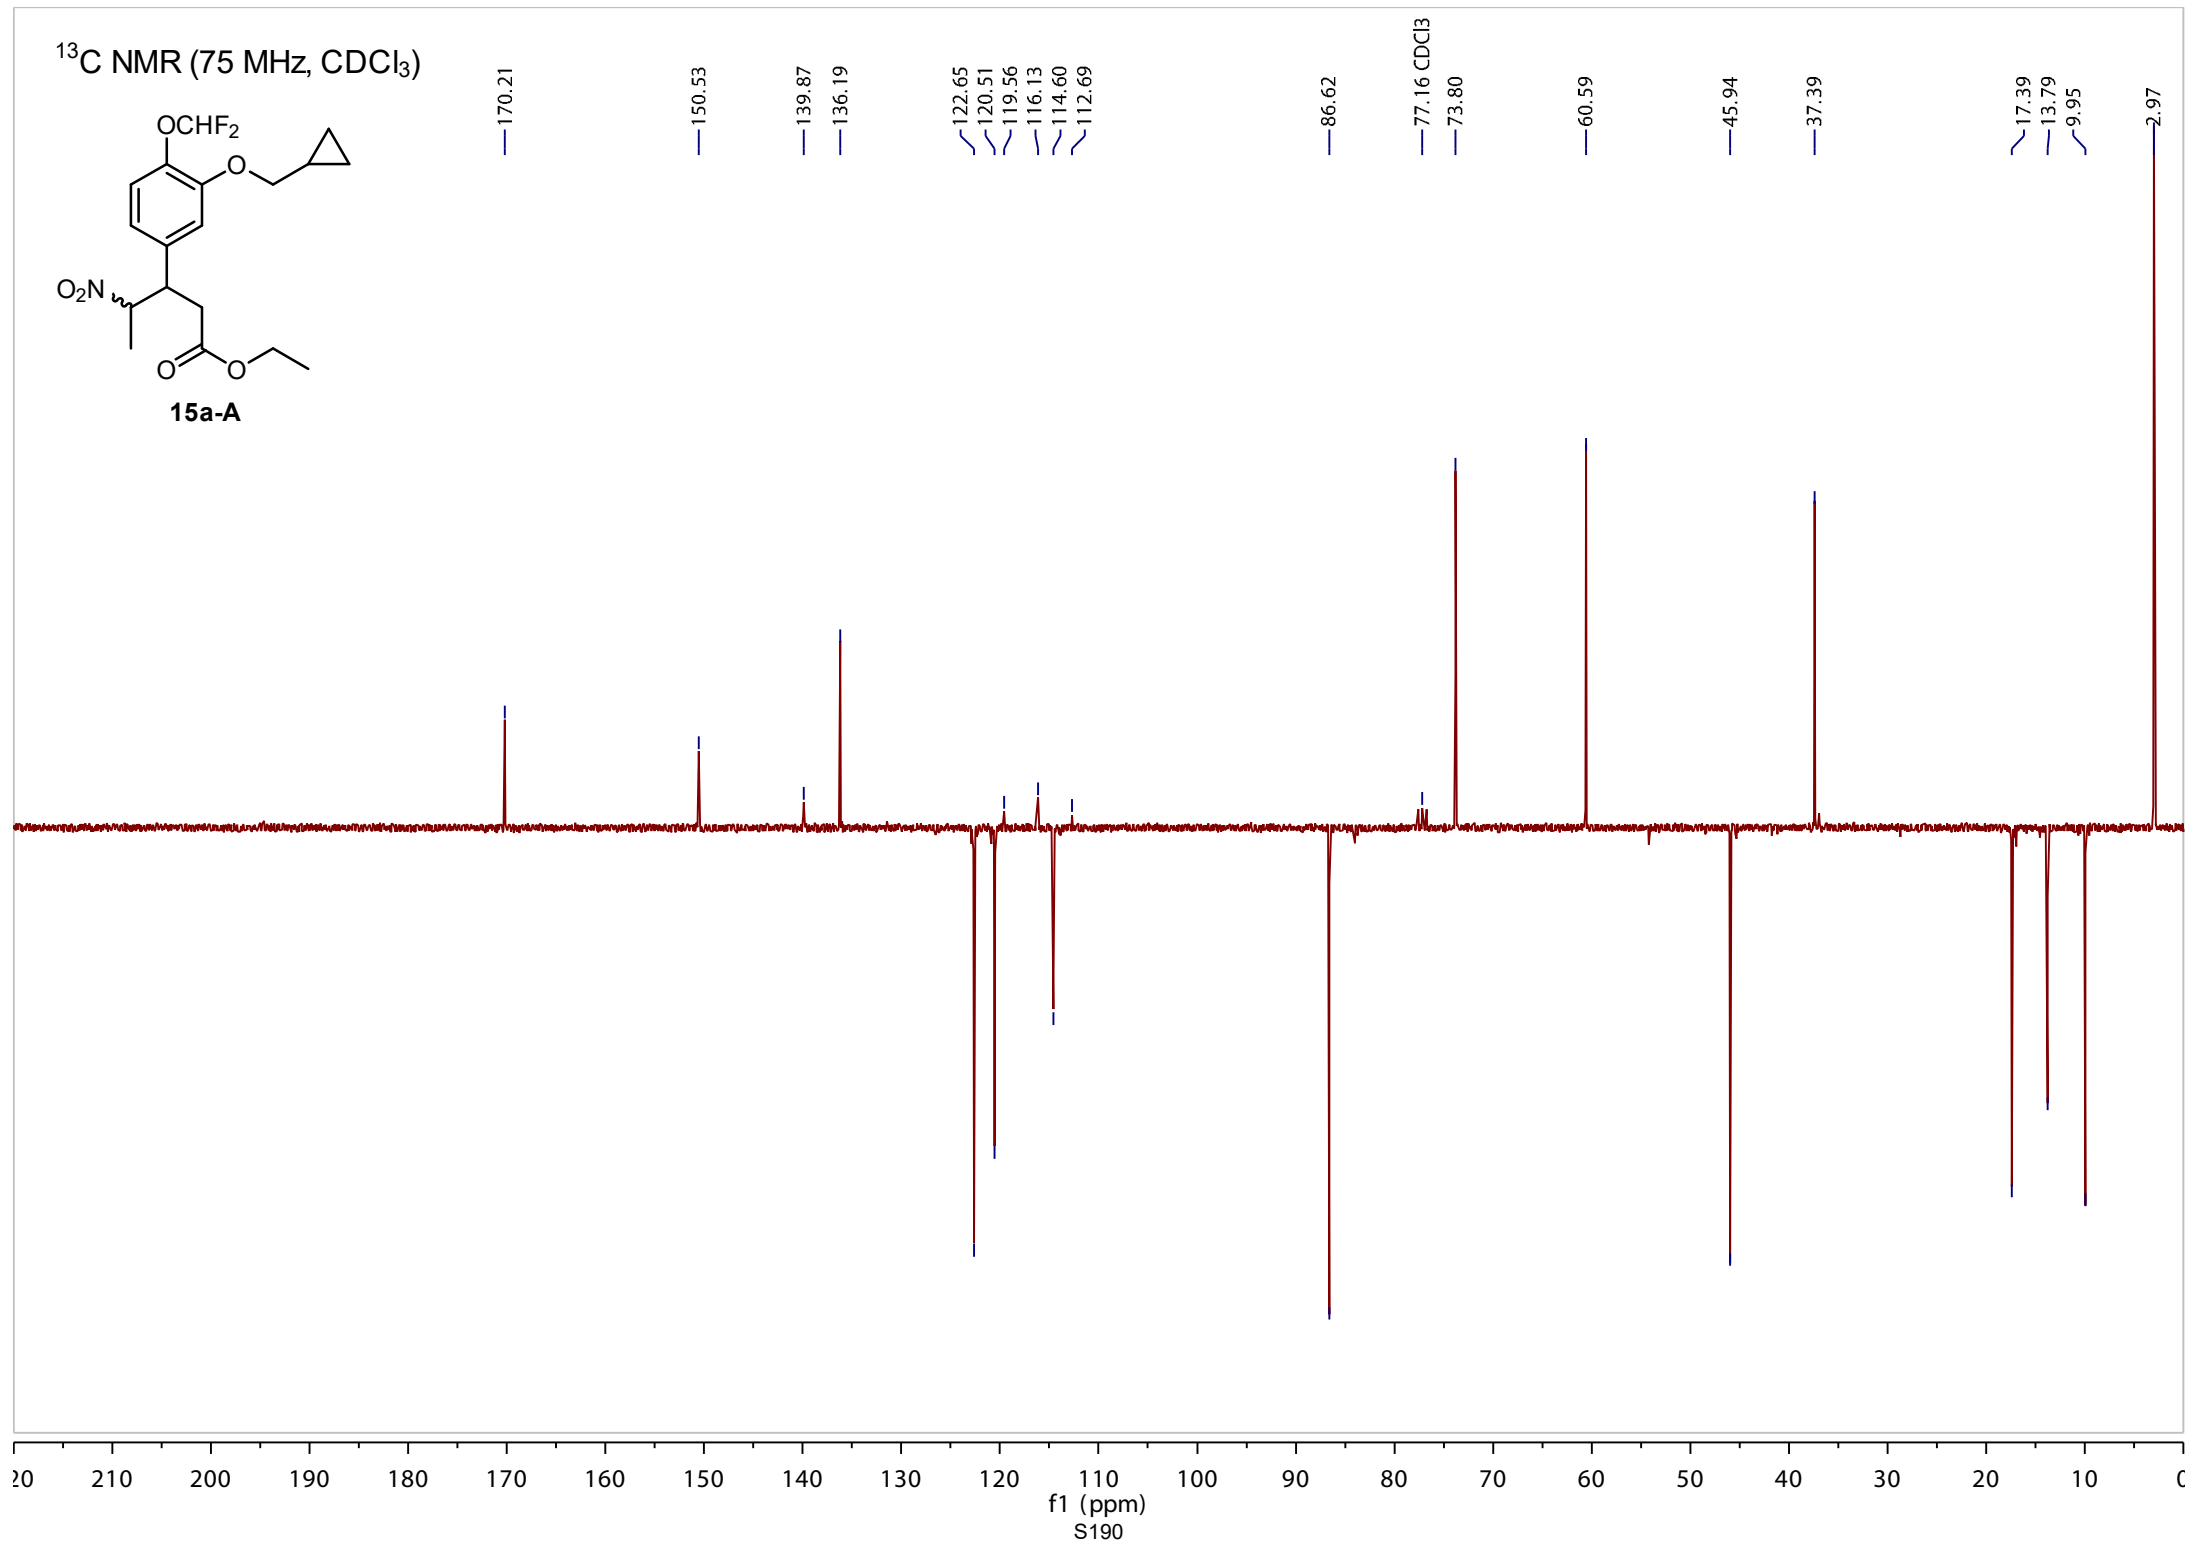

$^{19}\text{F}$  NMR (282 MHz,  $\text{CDCl}_3$ )

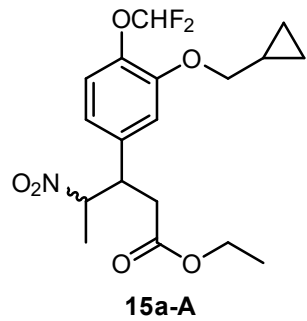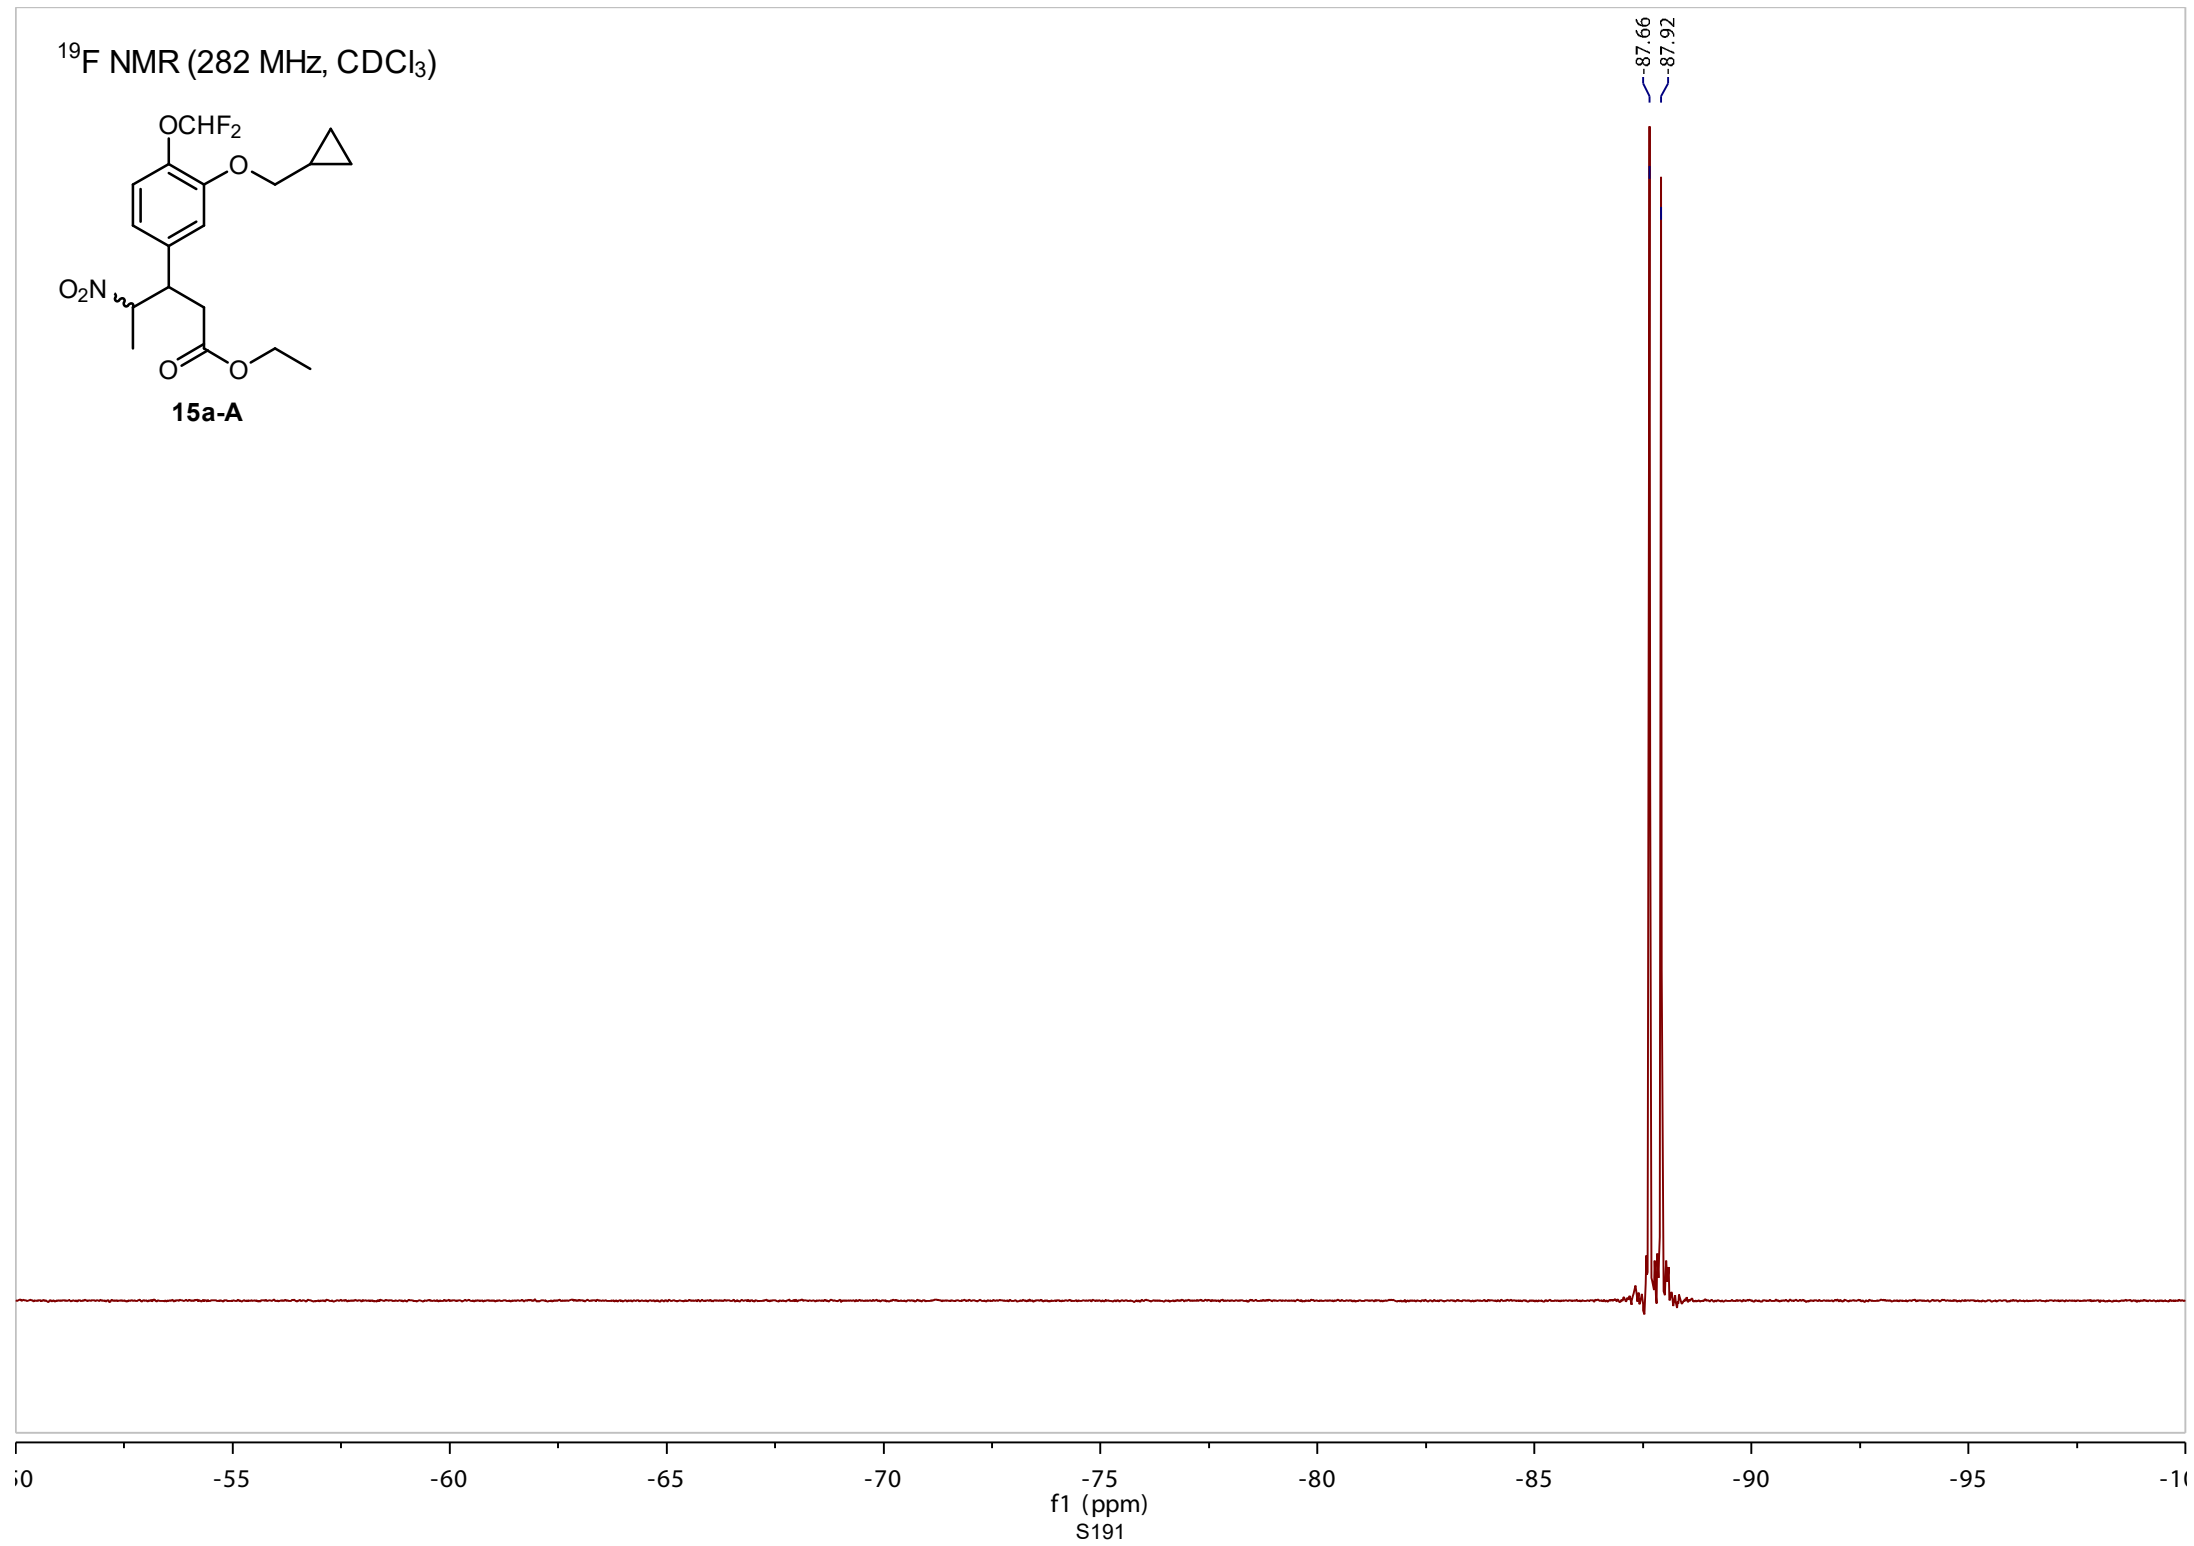

<sup>1</sup>H NMR (300 MHz, CDCl<sub>3</sub>)

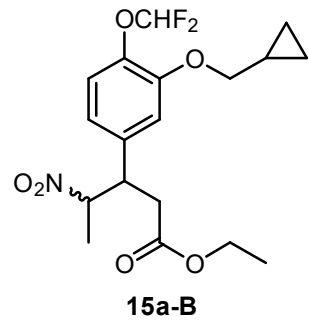

7.26  
7.04  
7.02  
6.81  
6.74  
6.70  
6.56  
6.31  
4.84  
4.01  
3.99  
3.82  
3.79  
3.64  
3.62  
2.76  
2.74  
2.70  
2.67  
1.53  
1.50  
1.21  
1.19  
1.11  
1.08  
1.06  
0.59  
0.57  
0.31  
0.29

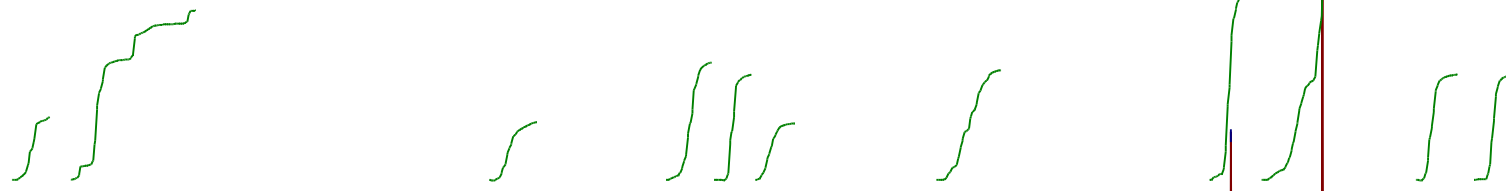

1.0 9.5 9.0 8.5 8.0 7.5 7.0 6.5 6.0 5.5 5.0 4.5 4.0 3.5 3.0 2.5 2.0 1.5 1.0 0.5 0.

f1 (ppm)  
S192

1.10 2.99 1.02 2.07 1.85 1.00 1.94 3.39 5.03 1.86 1.88



<sup>13</sup>C NMR (75 MHz, CDCl<sub>3</sub>)

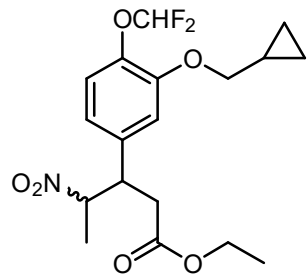

**15a-B**

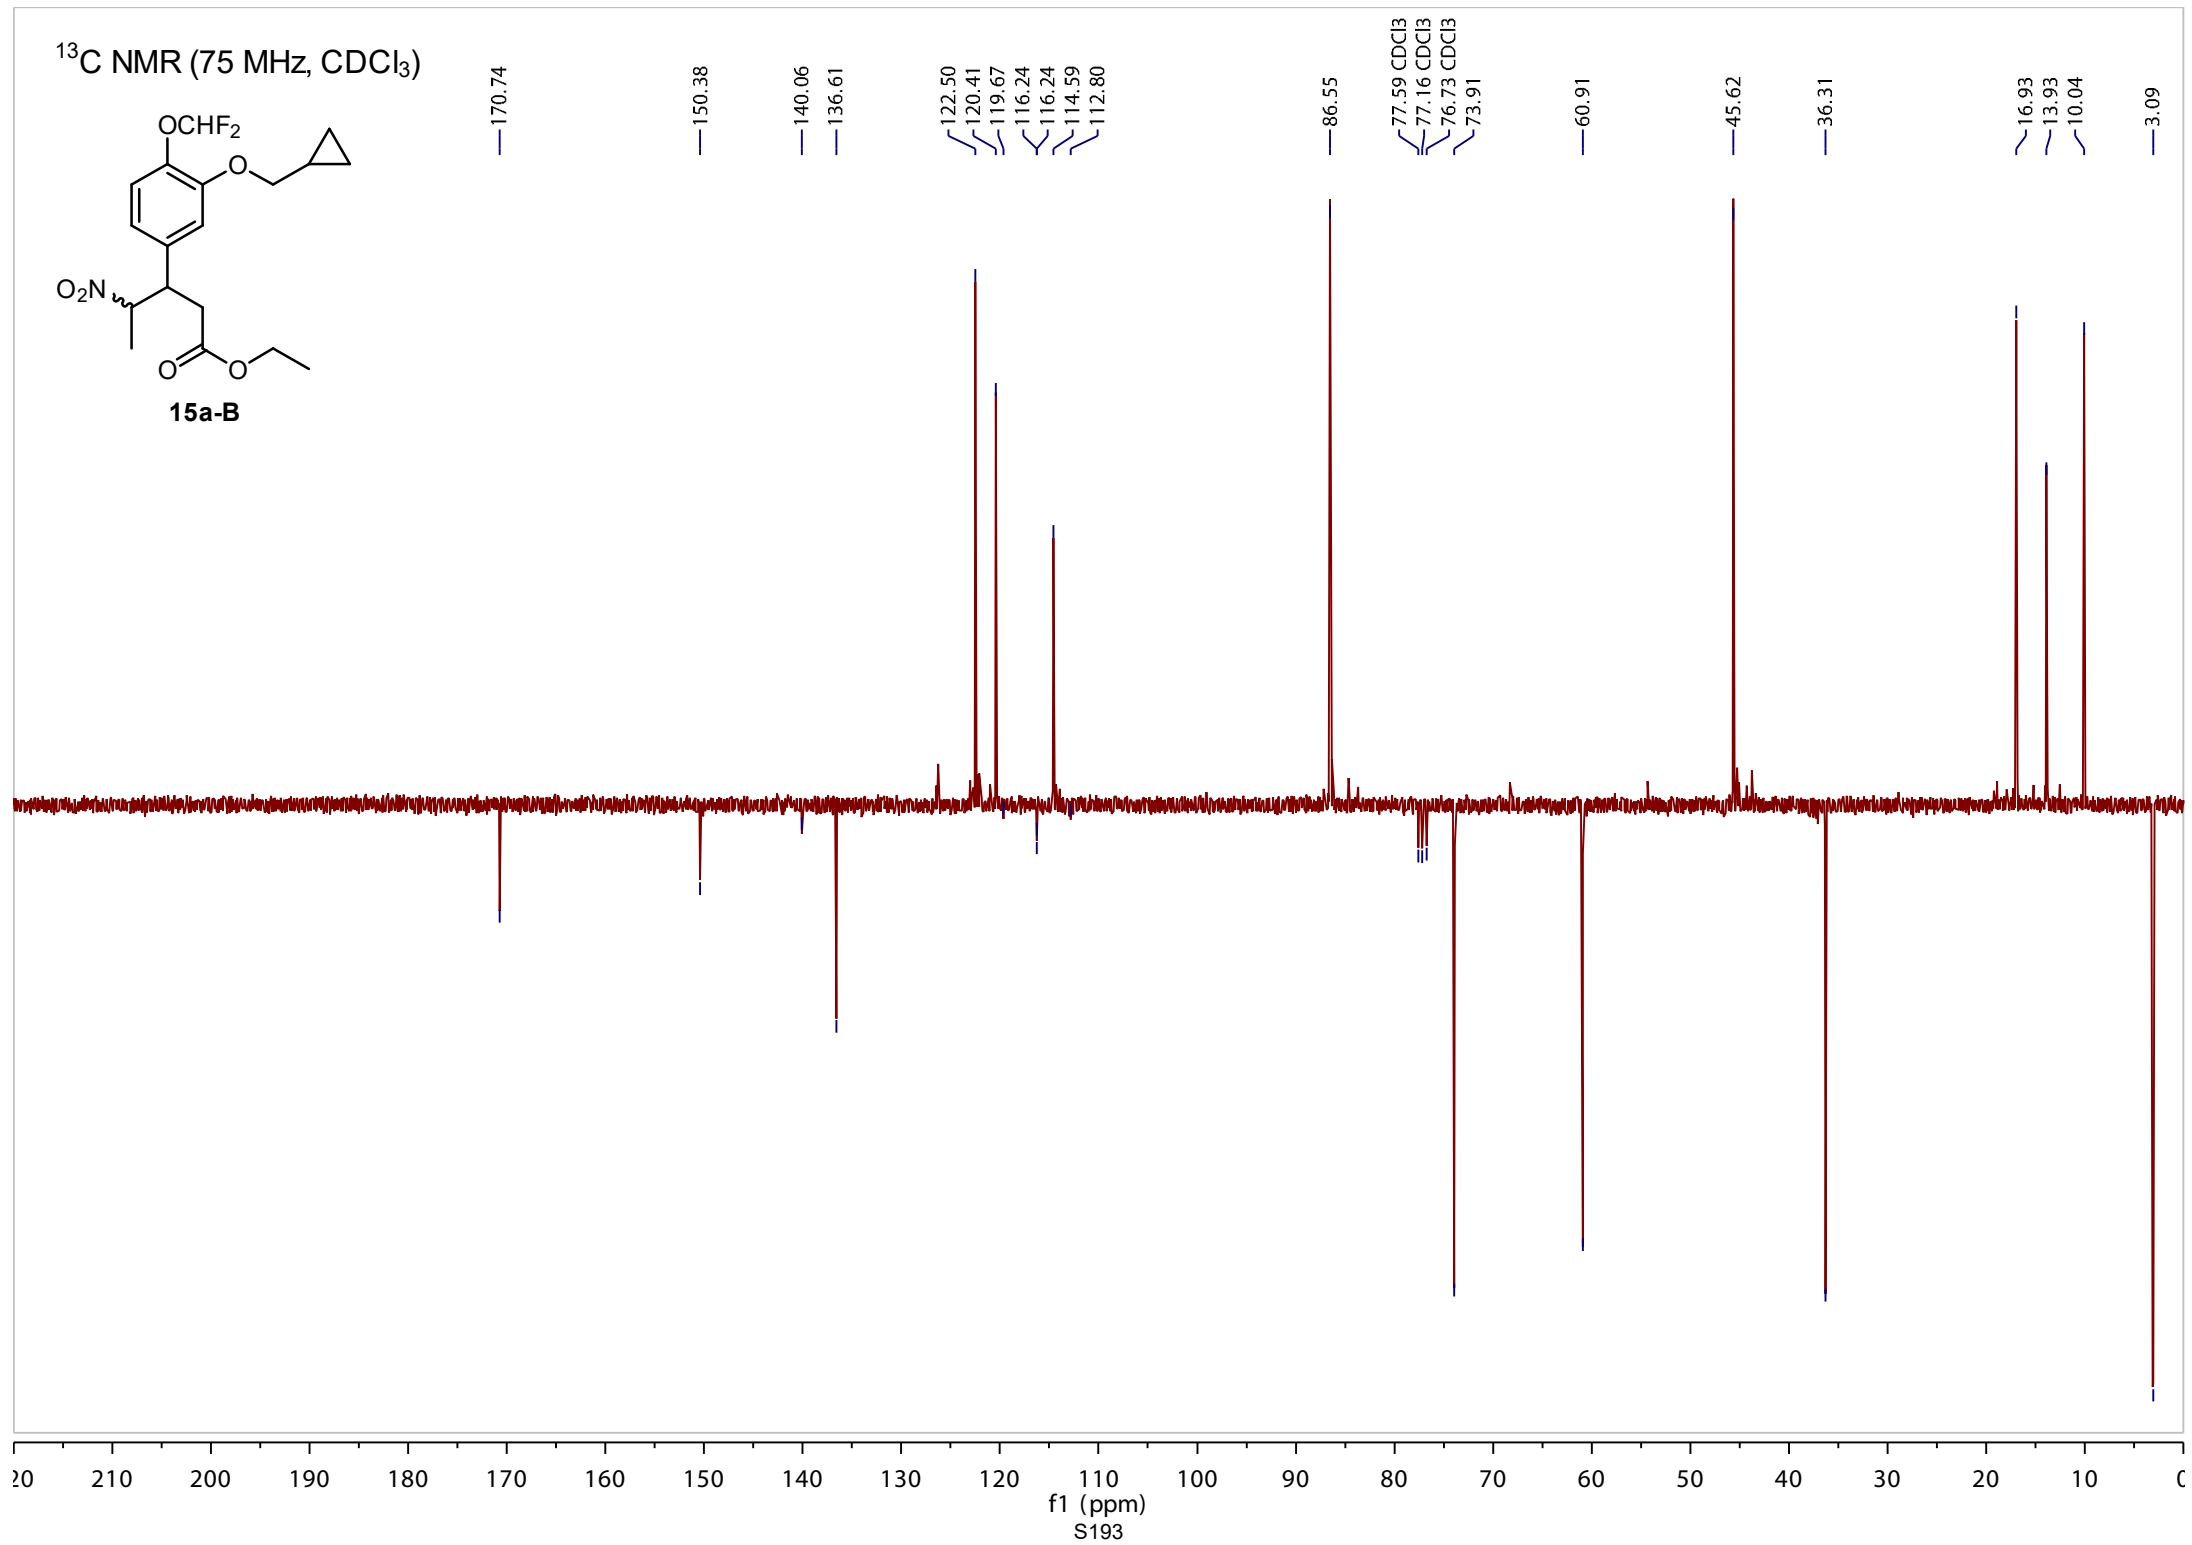

$^{19}\text{F}$  NMR (282 MHz,  $\text{CDCl}_3$ )

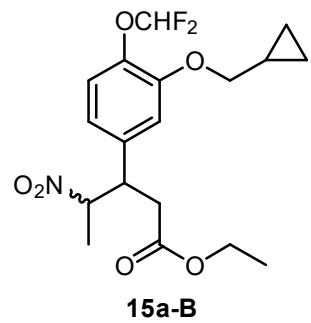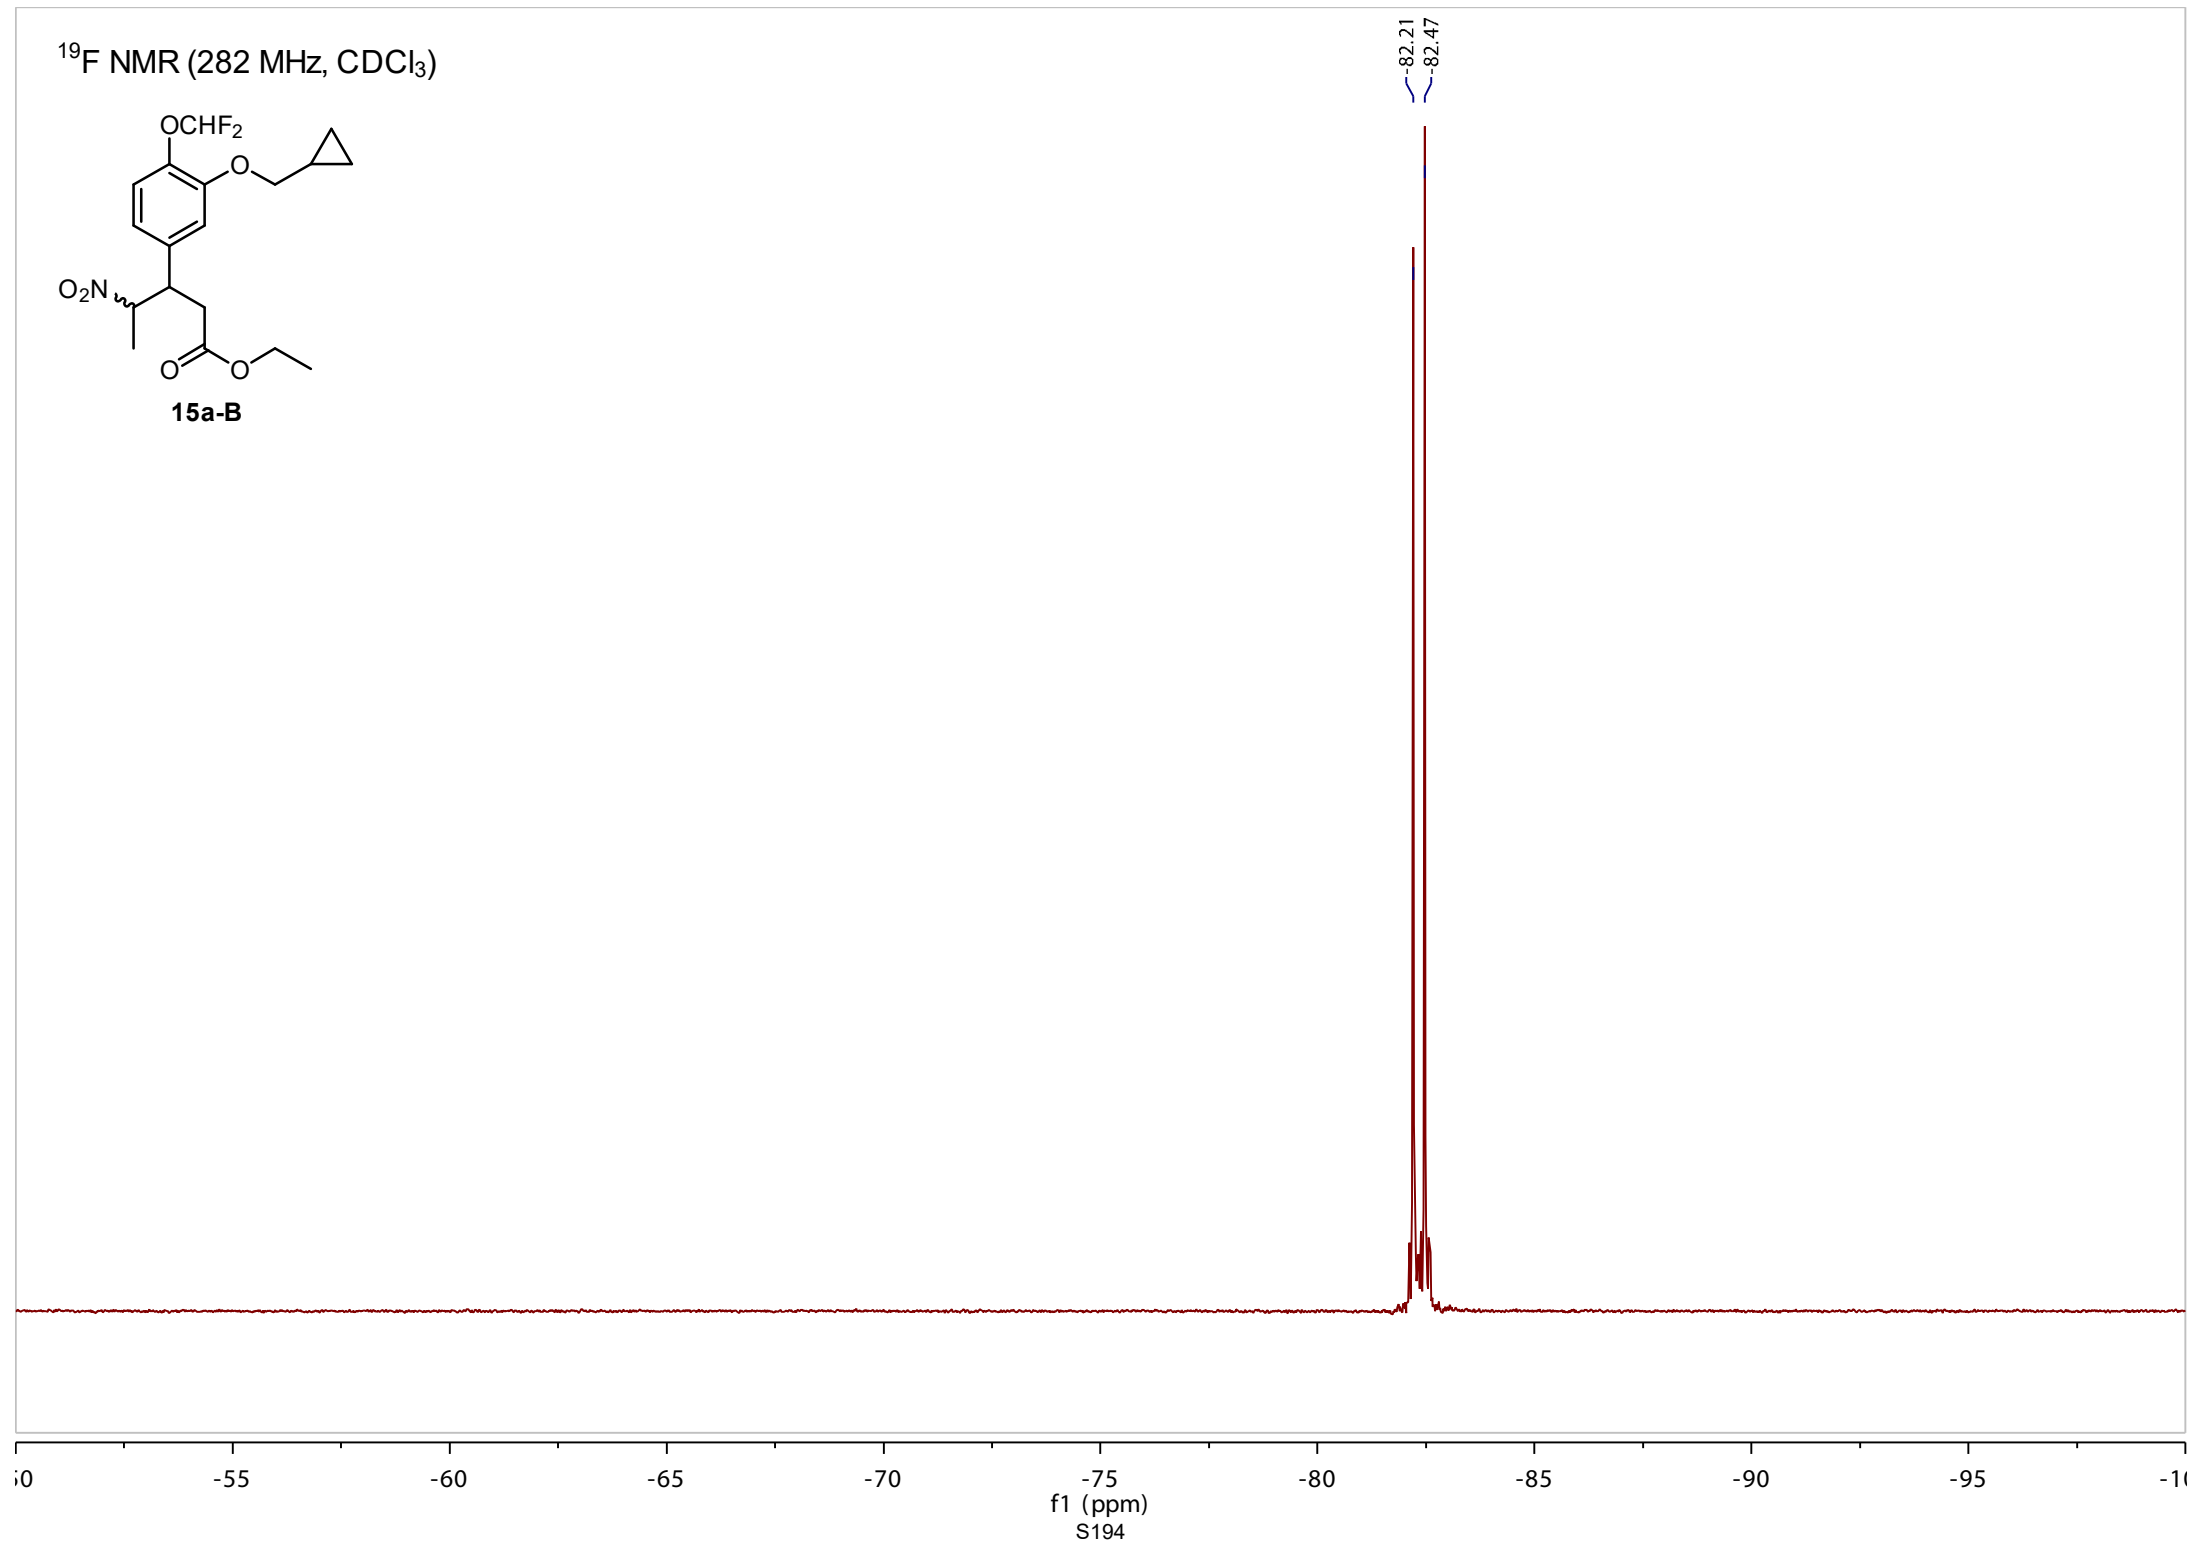

<sup>1</sup>H NMR (300 MHz, CDCl<sub>3</sub>)

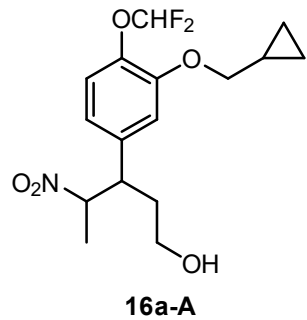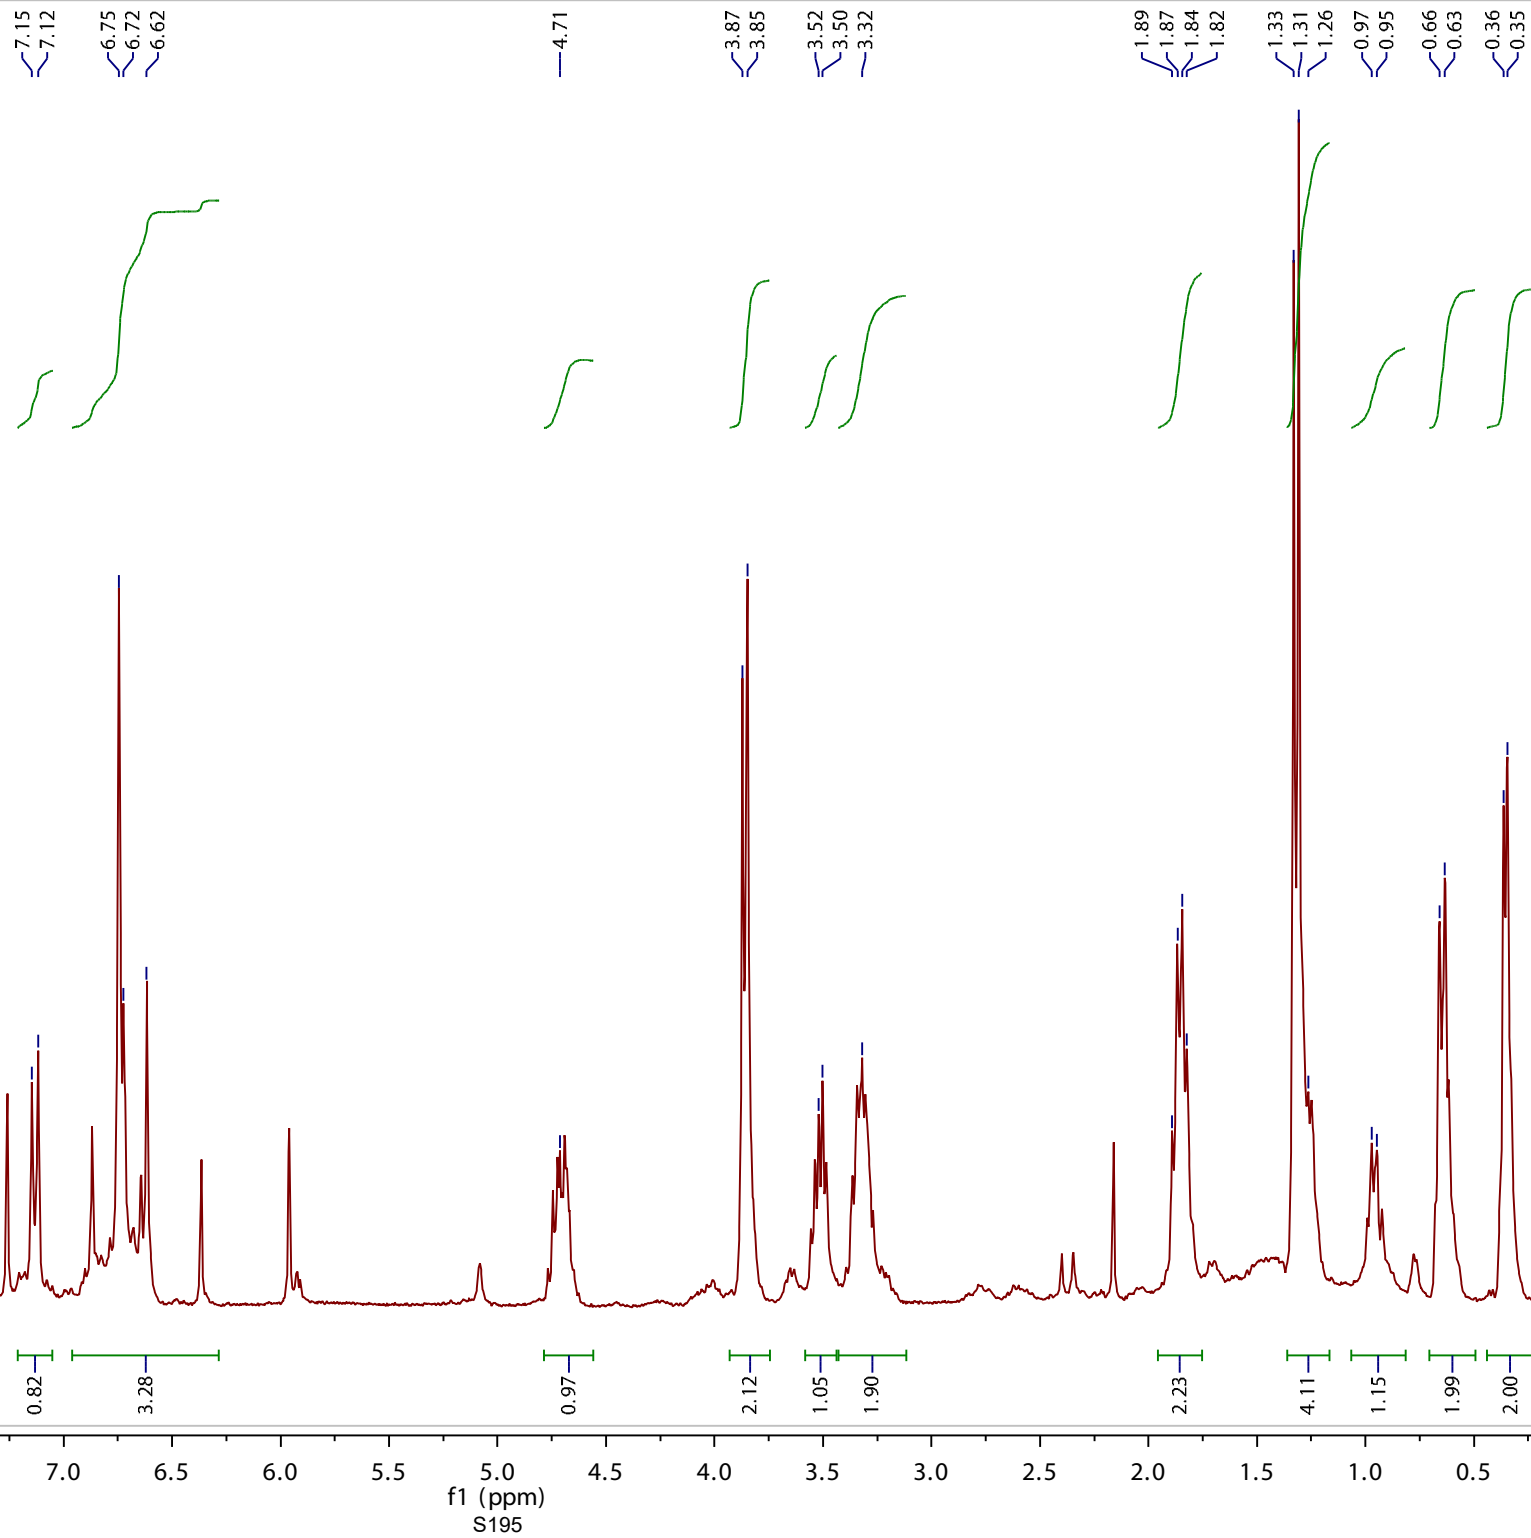

1.0 9.5 9.0 8.5 8.0 7.5 7.0 6.5 6.0 5.5 5.0 4.5 4.0 3.5 3.0 2.5 2.0 1.5 1.0 0.5

f1 (ppm)  
S195

$^{13}\text{C}$  NMR (75 MHz,  $\text{CDCl}_3$ )

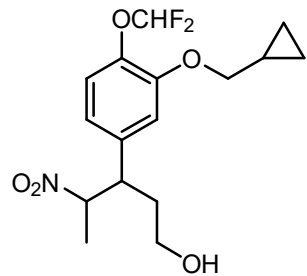

**16a-A**

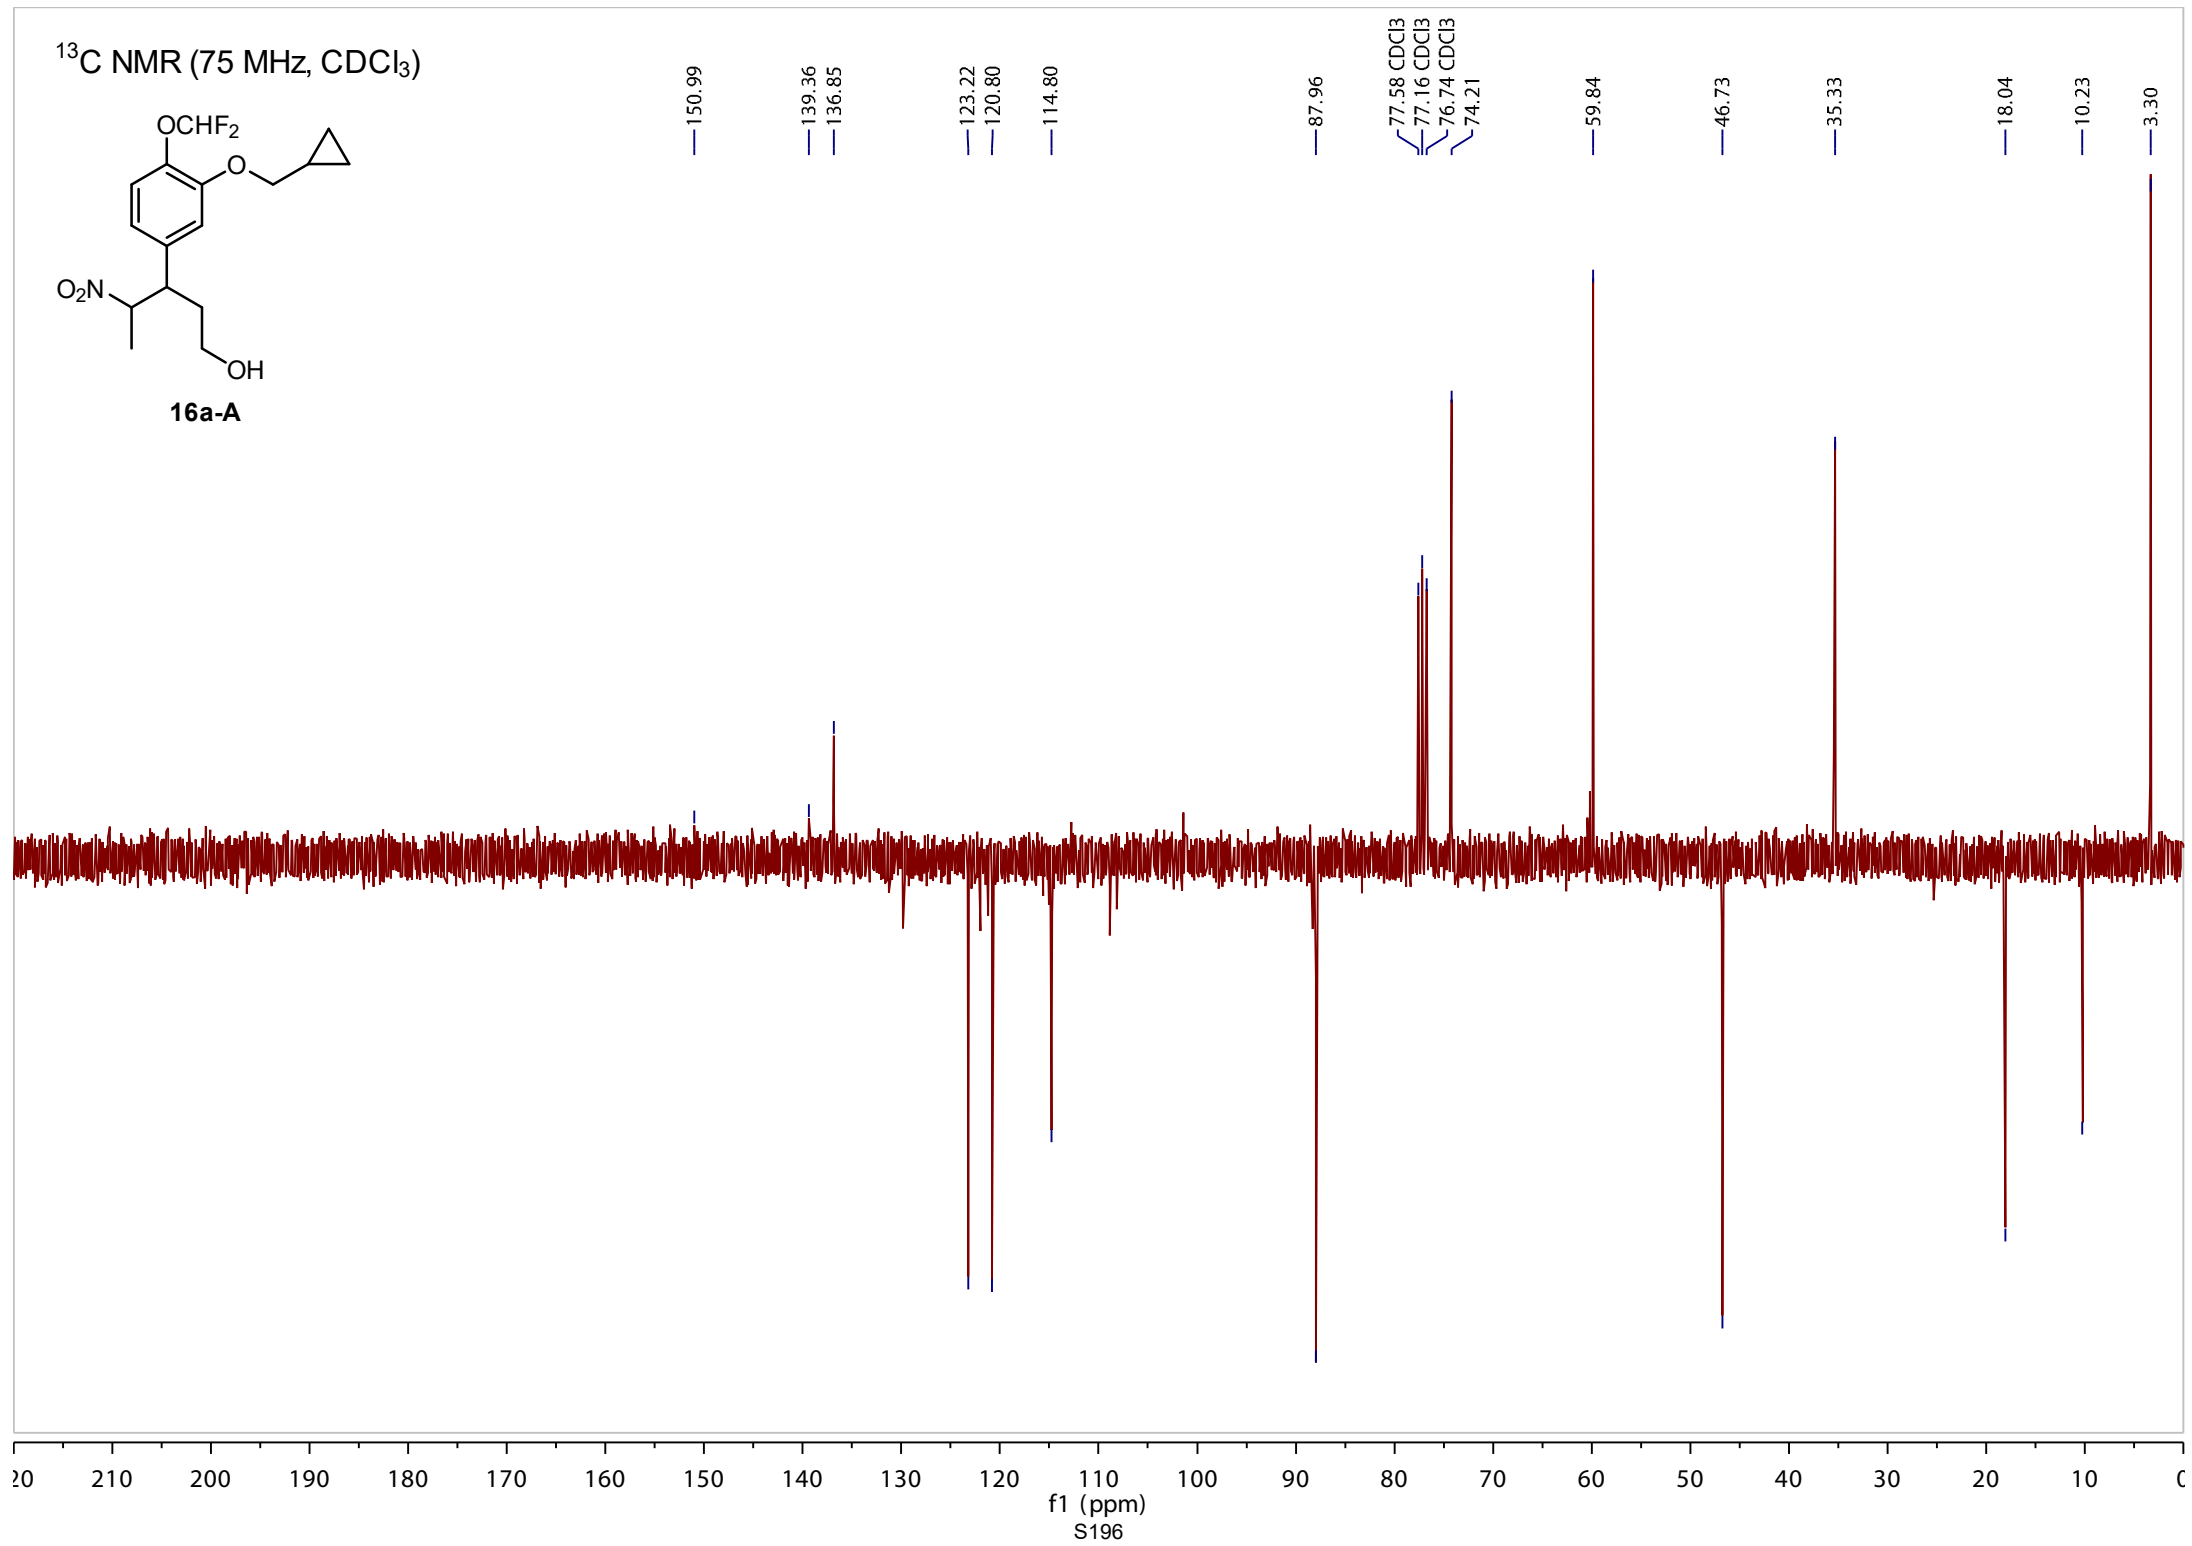

$^{19}\text{F}$  NMR (282 MHz,  $\text{CDCl}_3$ )

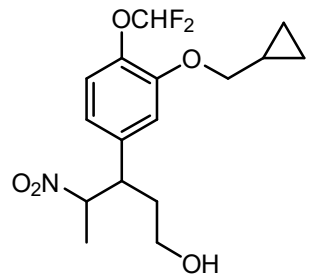

**16a-A**

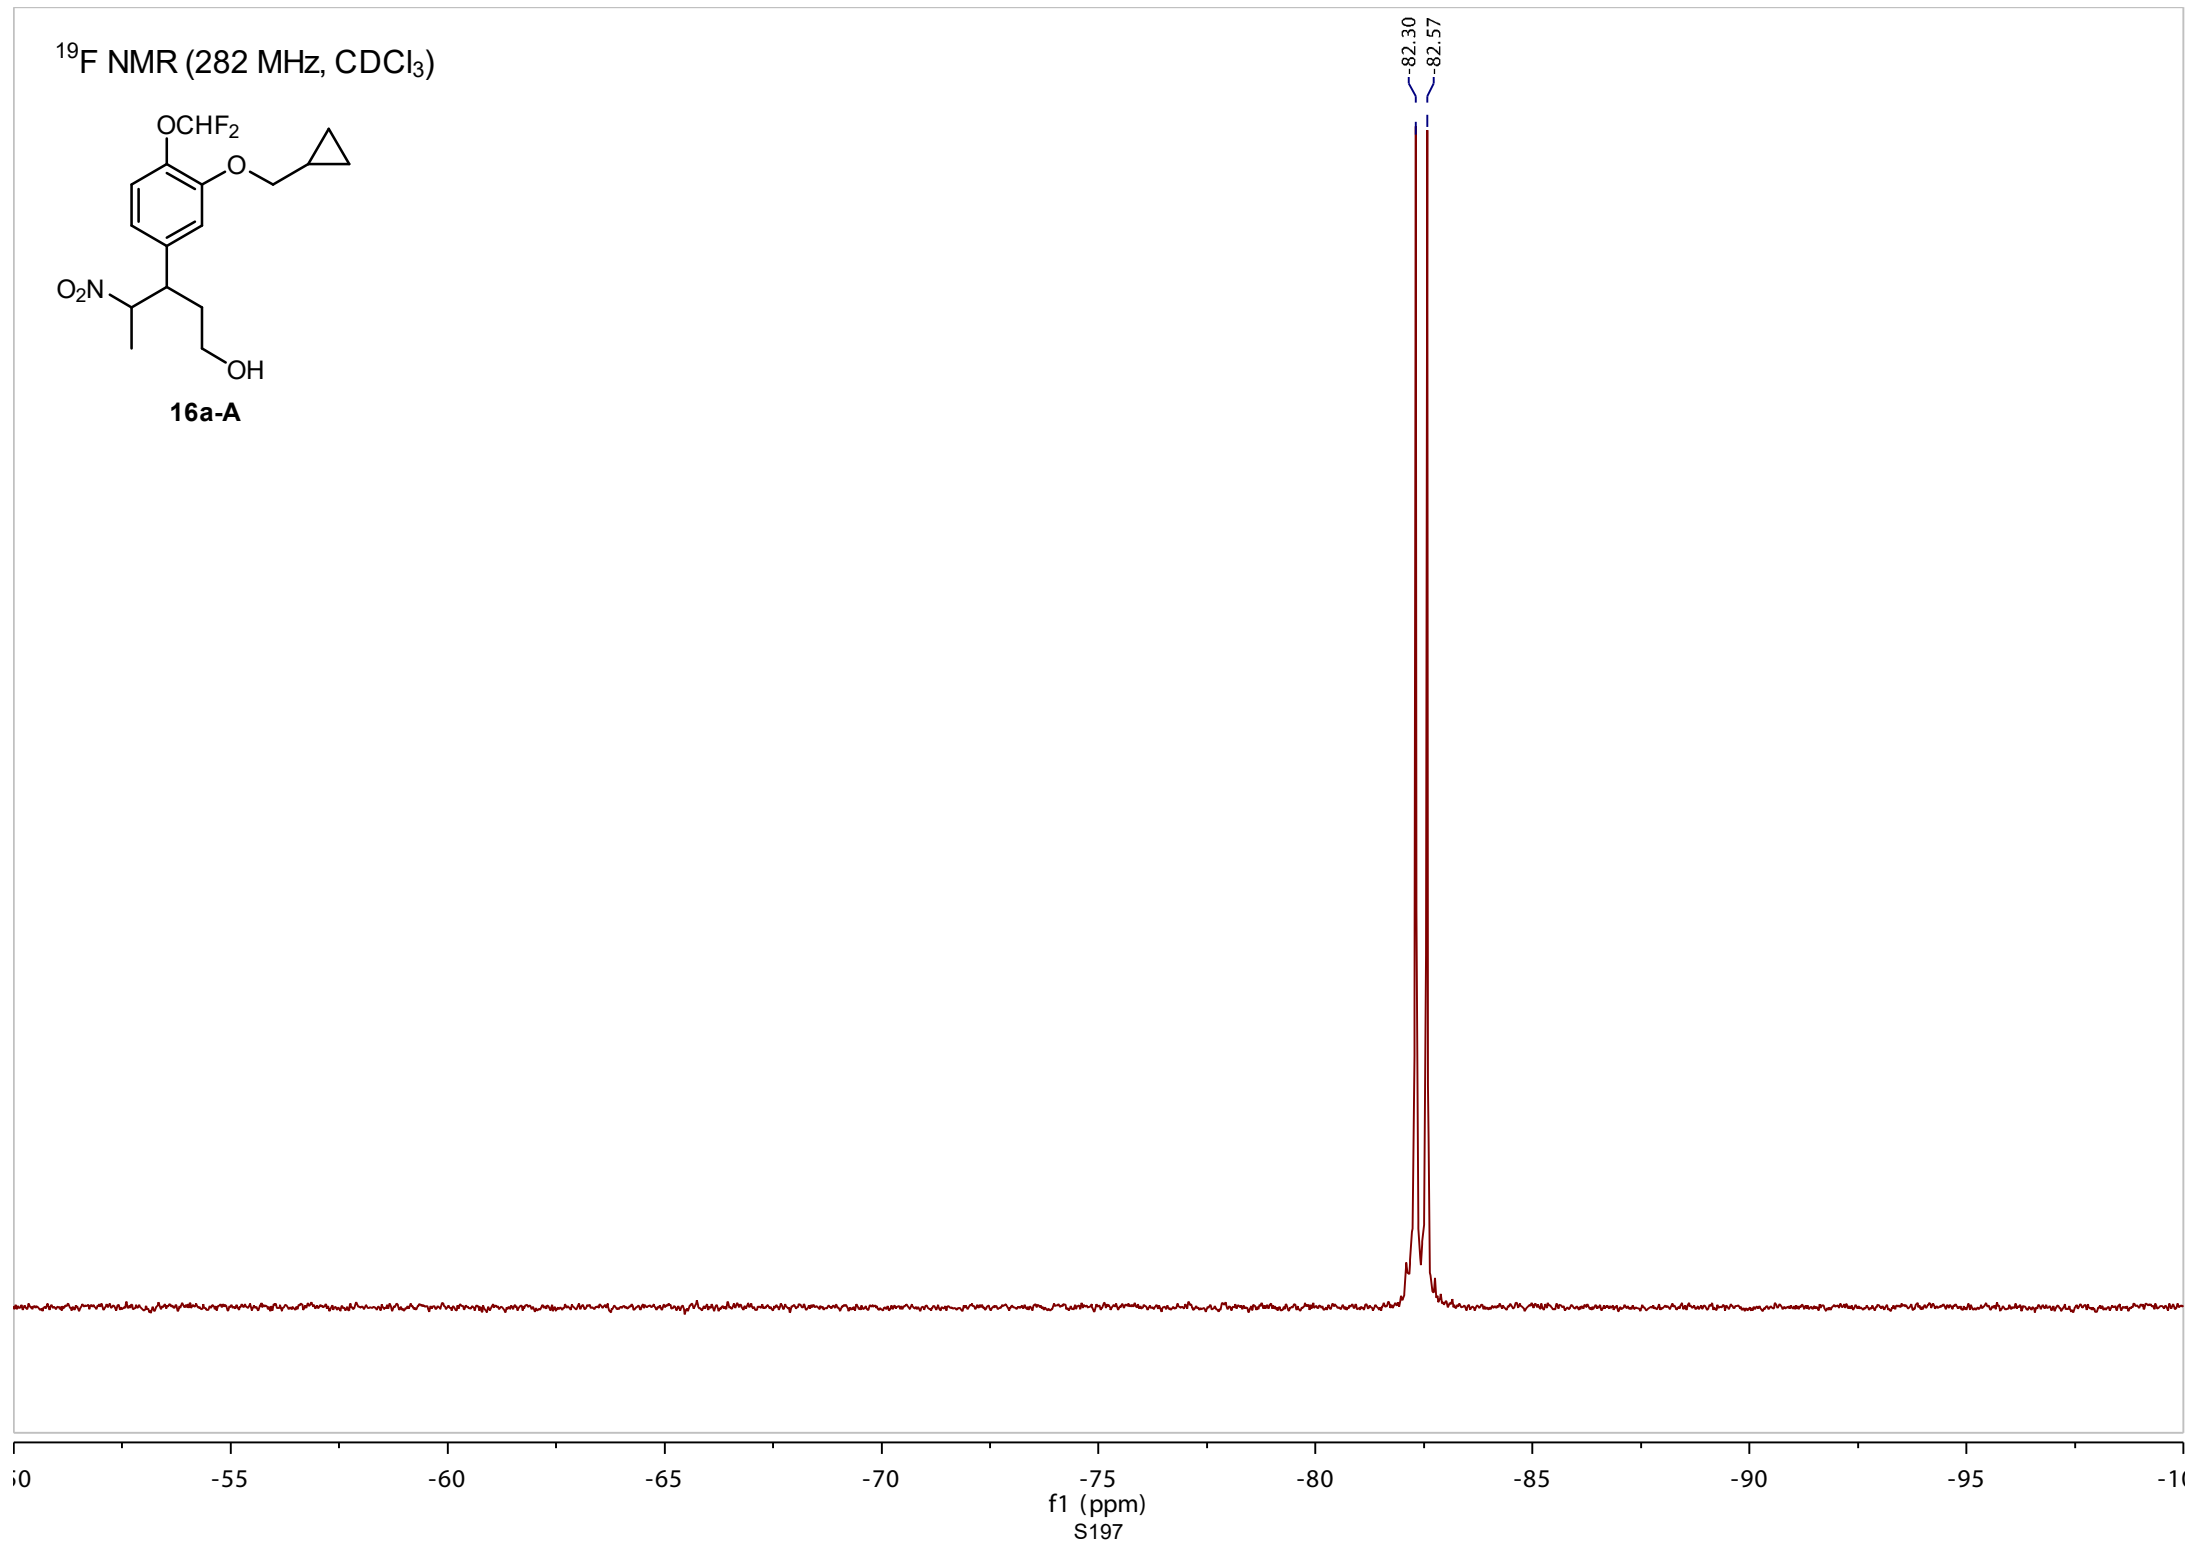

<sup>1</sup>H NMR (300 MHz, CDCl<sub>3</sub>)

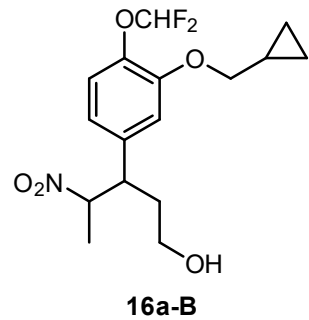

7.26  
7.10  
7.08  
6.84  
6.75  
6.74  
6.59  
6.34

4.81  
4.78  
4.76

3.85  
3.83  
3.57  
3.56  
3.38  
3.36

2.04  
2.01  
1.85  
1.83  
1.62  
1.59  
1.33  
1.25

0.65  
0.62  
0.35  
0.33

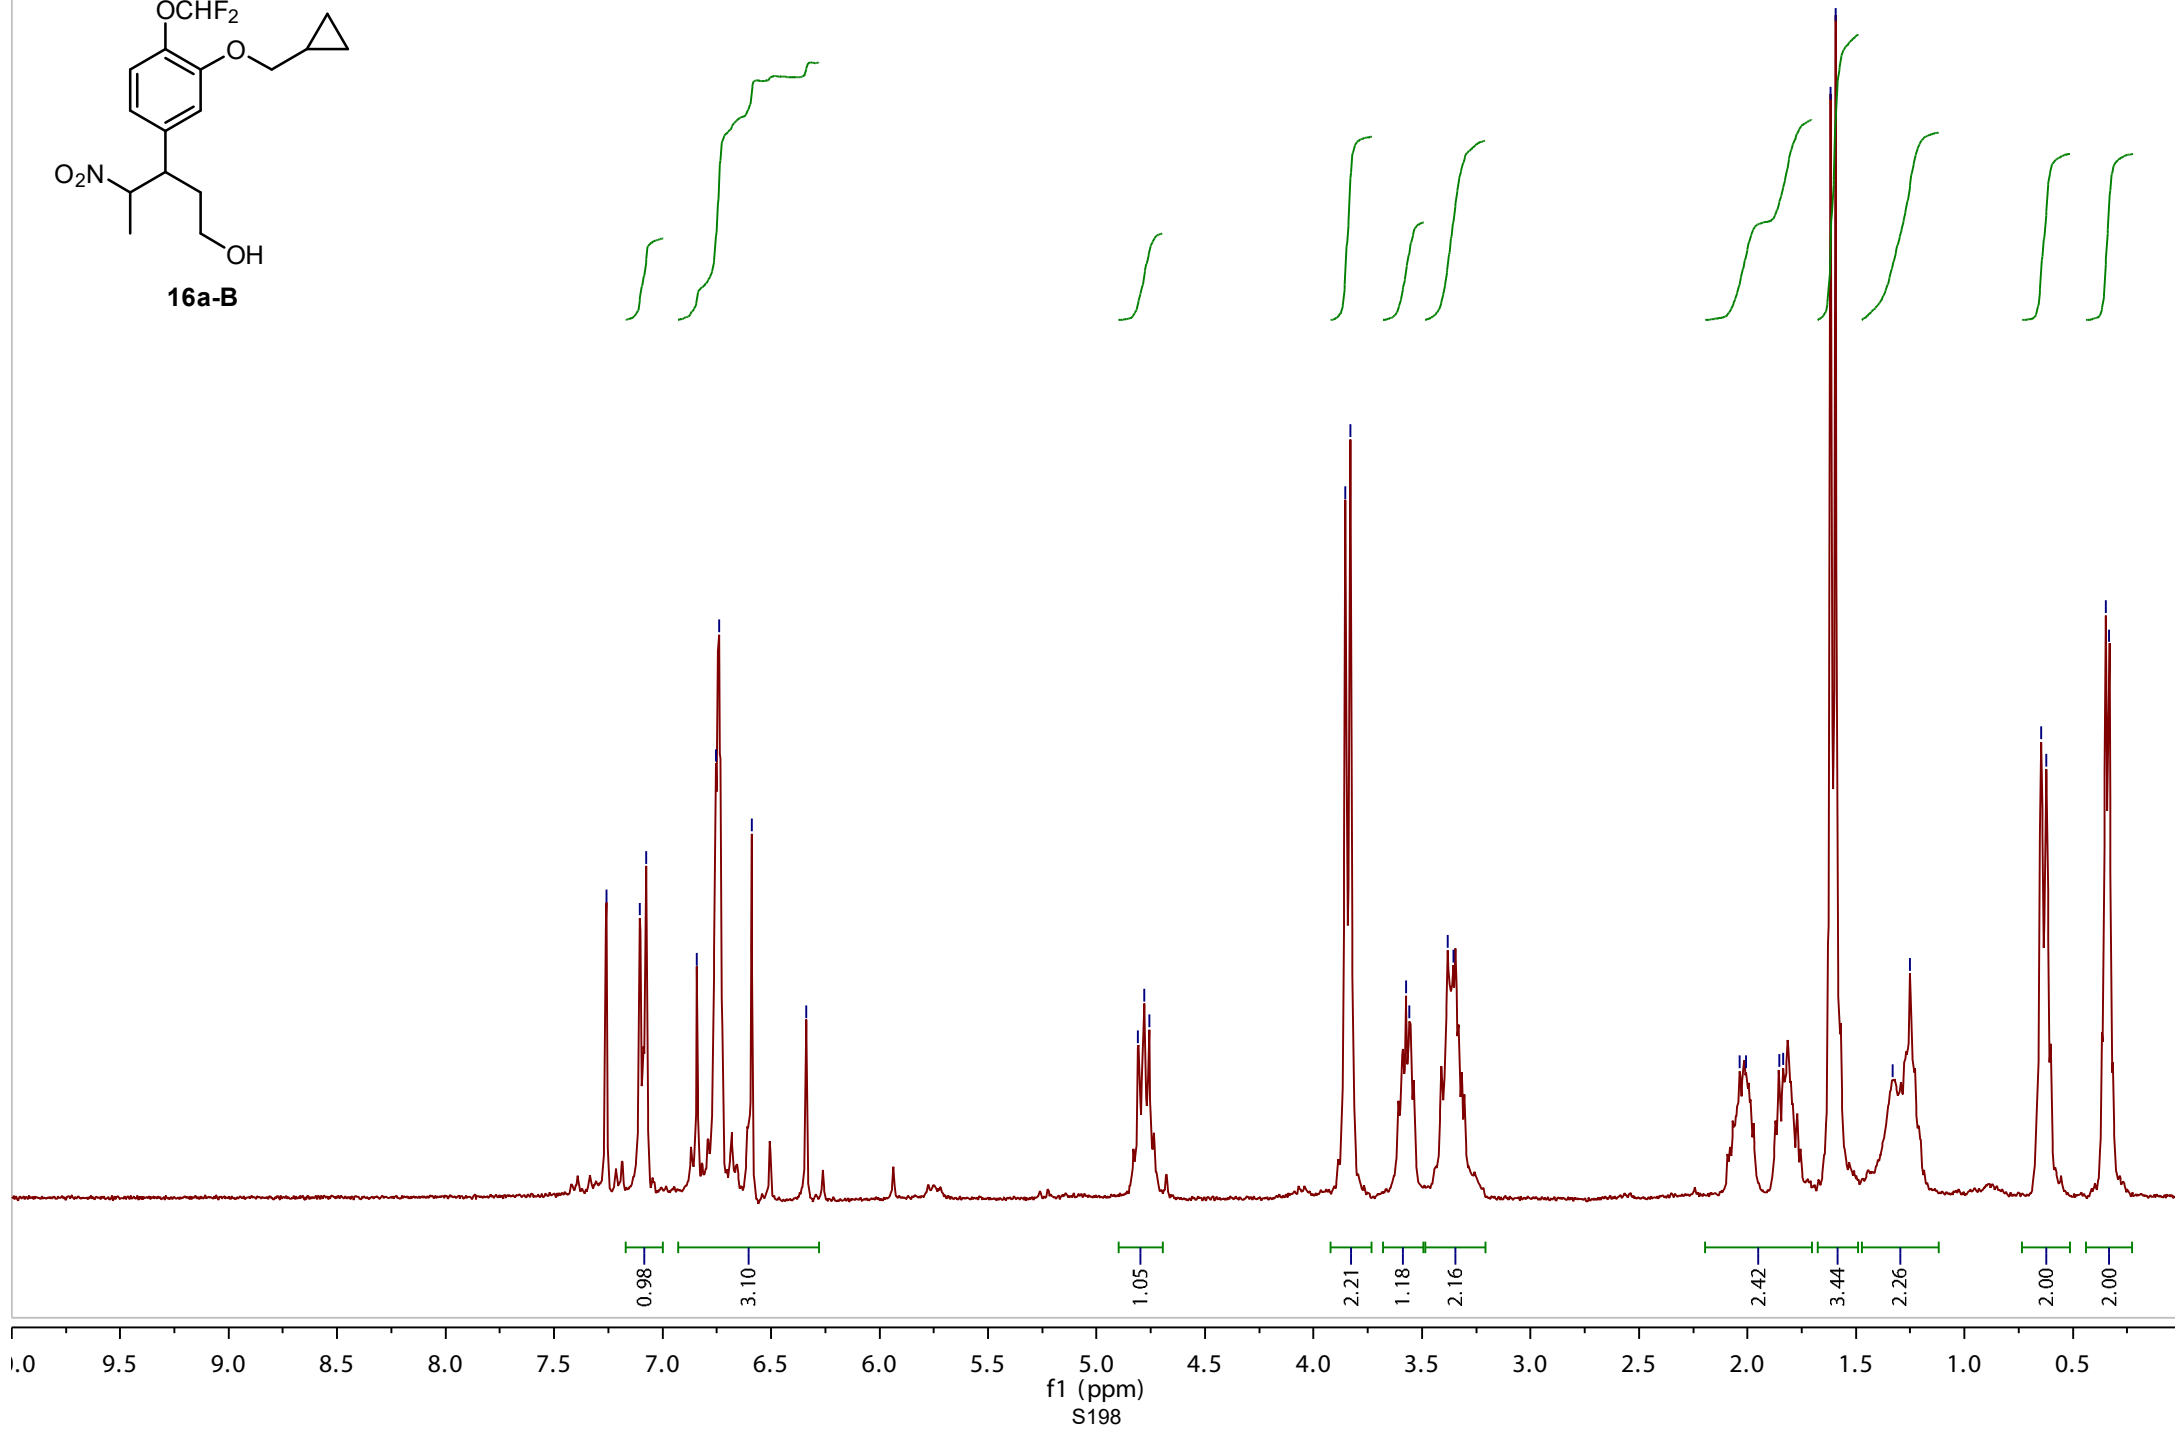

$^{13}\text{C}$  NMR (75 MHz,  $\text{CDCl}_3$ )

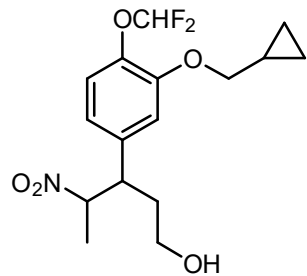

**16a-B**

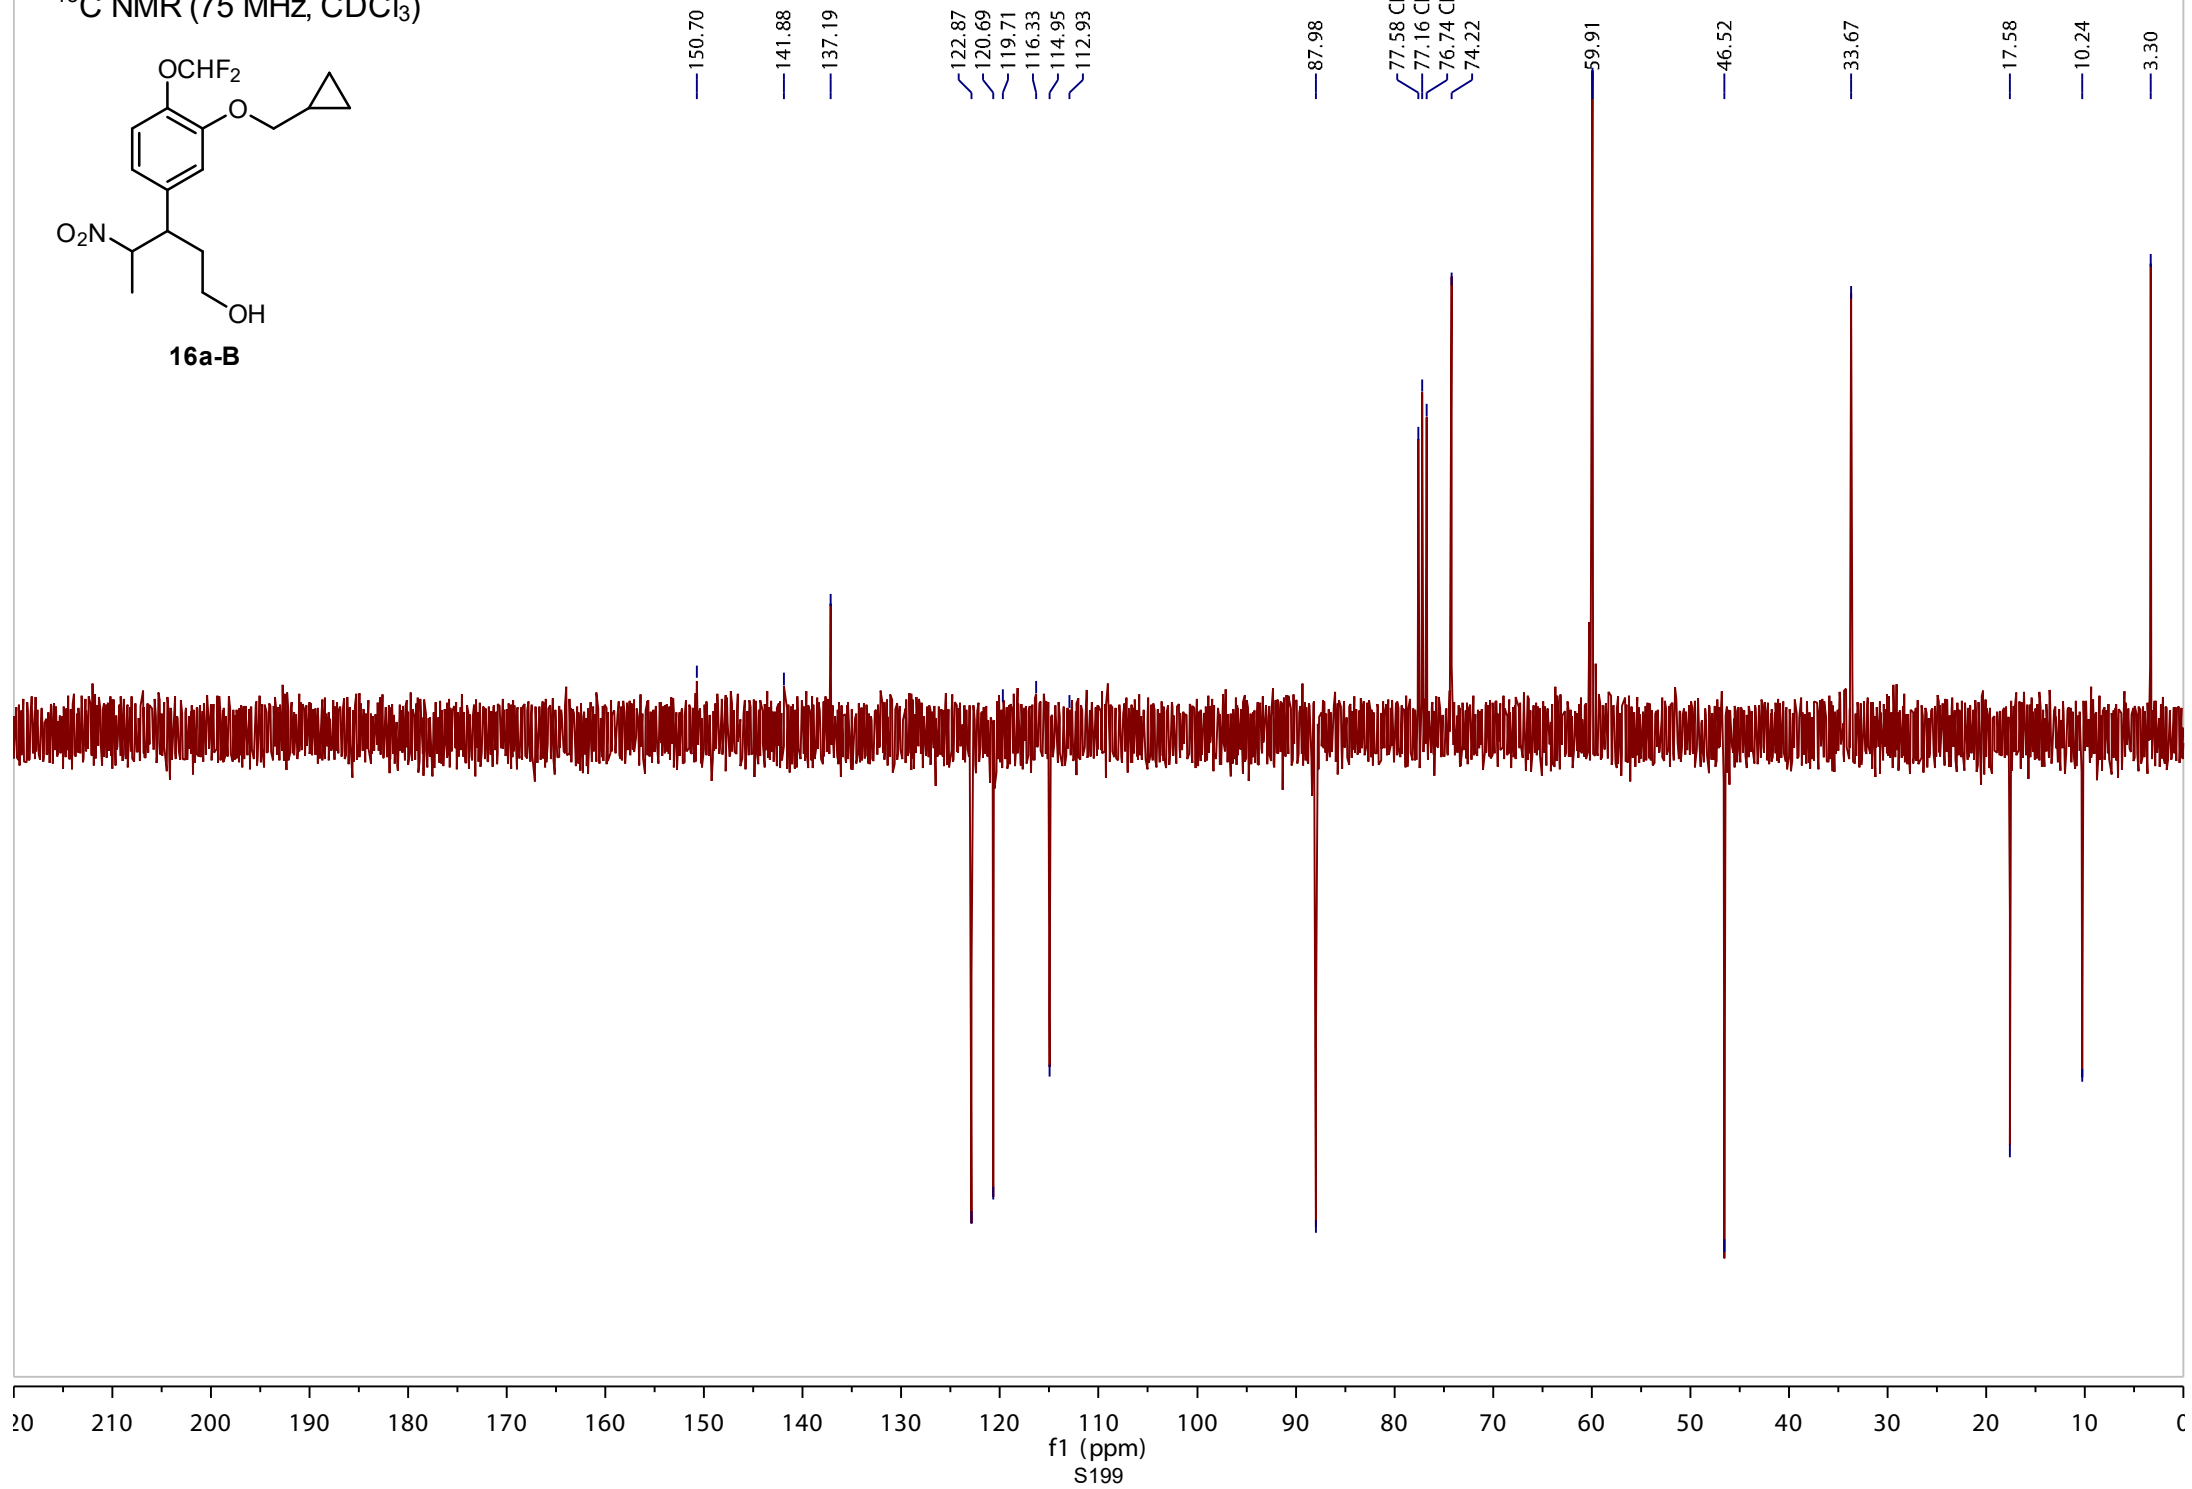

$^{19}\text{F}$  NMR (282 MHz,  $\text{CDCl}_3$ )

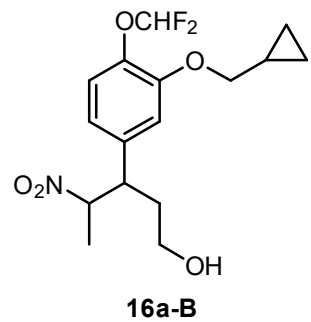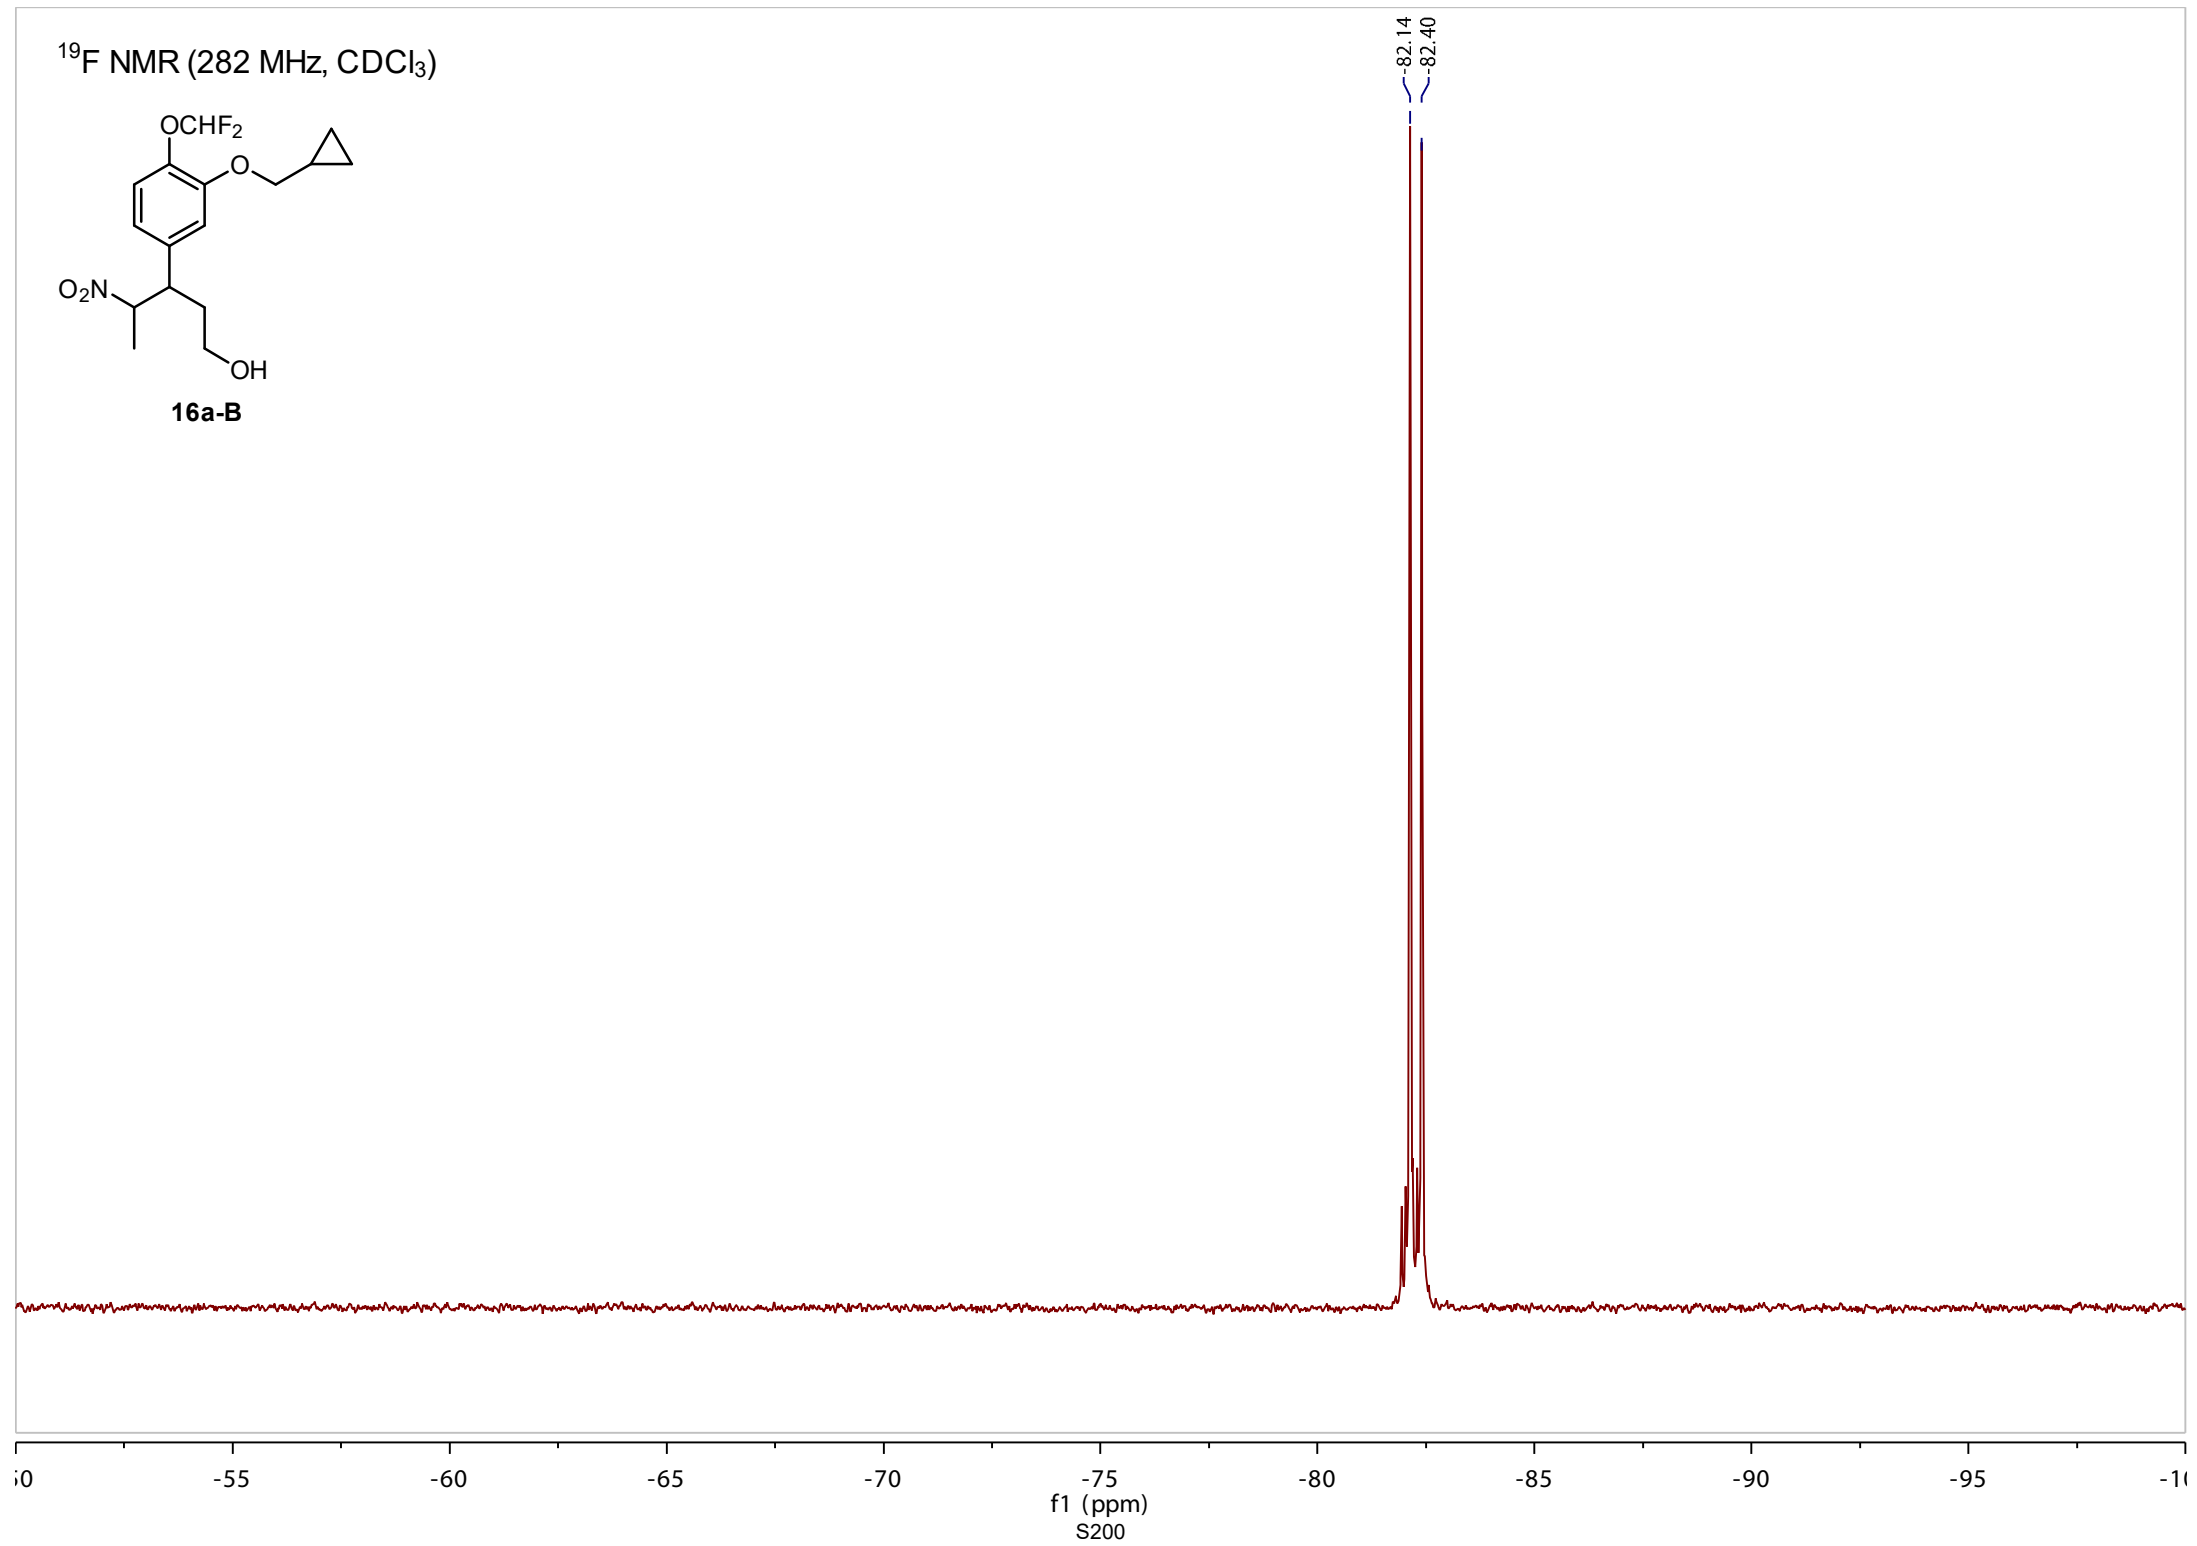



<sup>1</sup>H NMR (300 MHz, CDCl<sub>3</sub>)

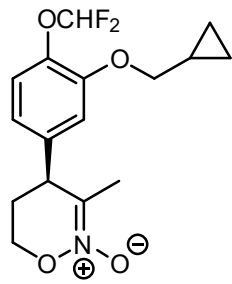

18a

7.26  
7.14  
7.11  
6.86  
6.75  
6.72  
6.70  
6.60  
6.35

4.42  
4.41  
3.85  
3.82  
3.73  
3.71

2.33  
2.02  
1.98  
1.89  
1.83

1.25

0.65  
0.62  
0.35  
0.34

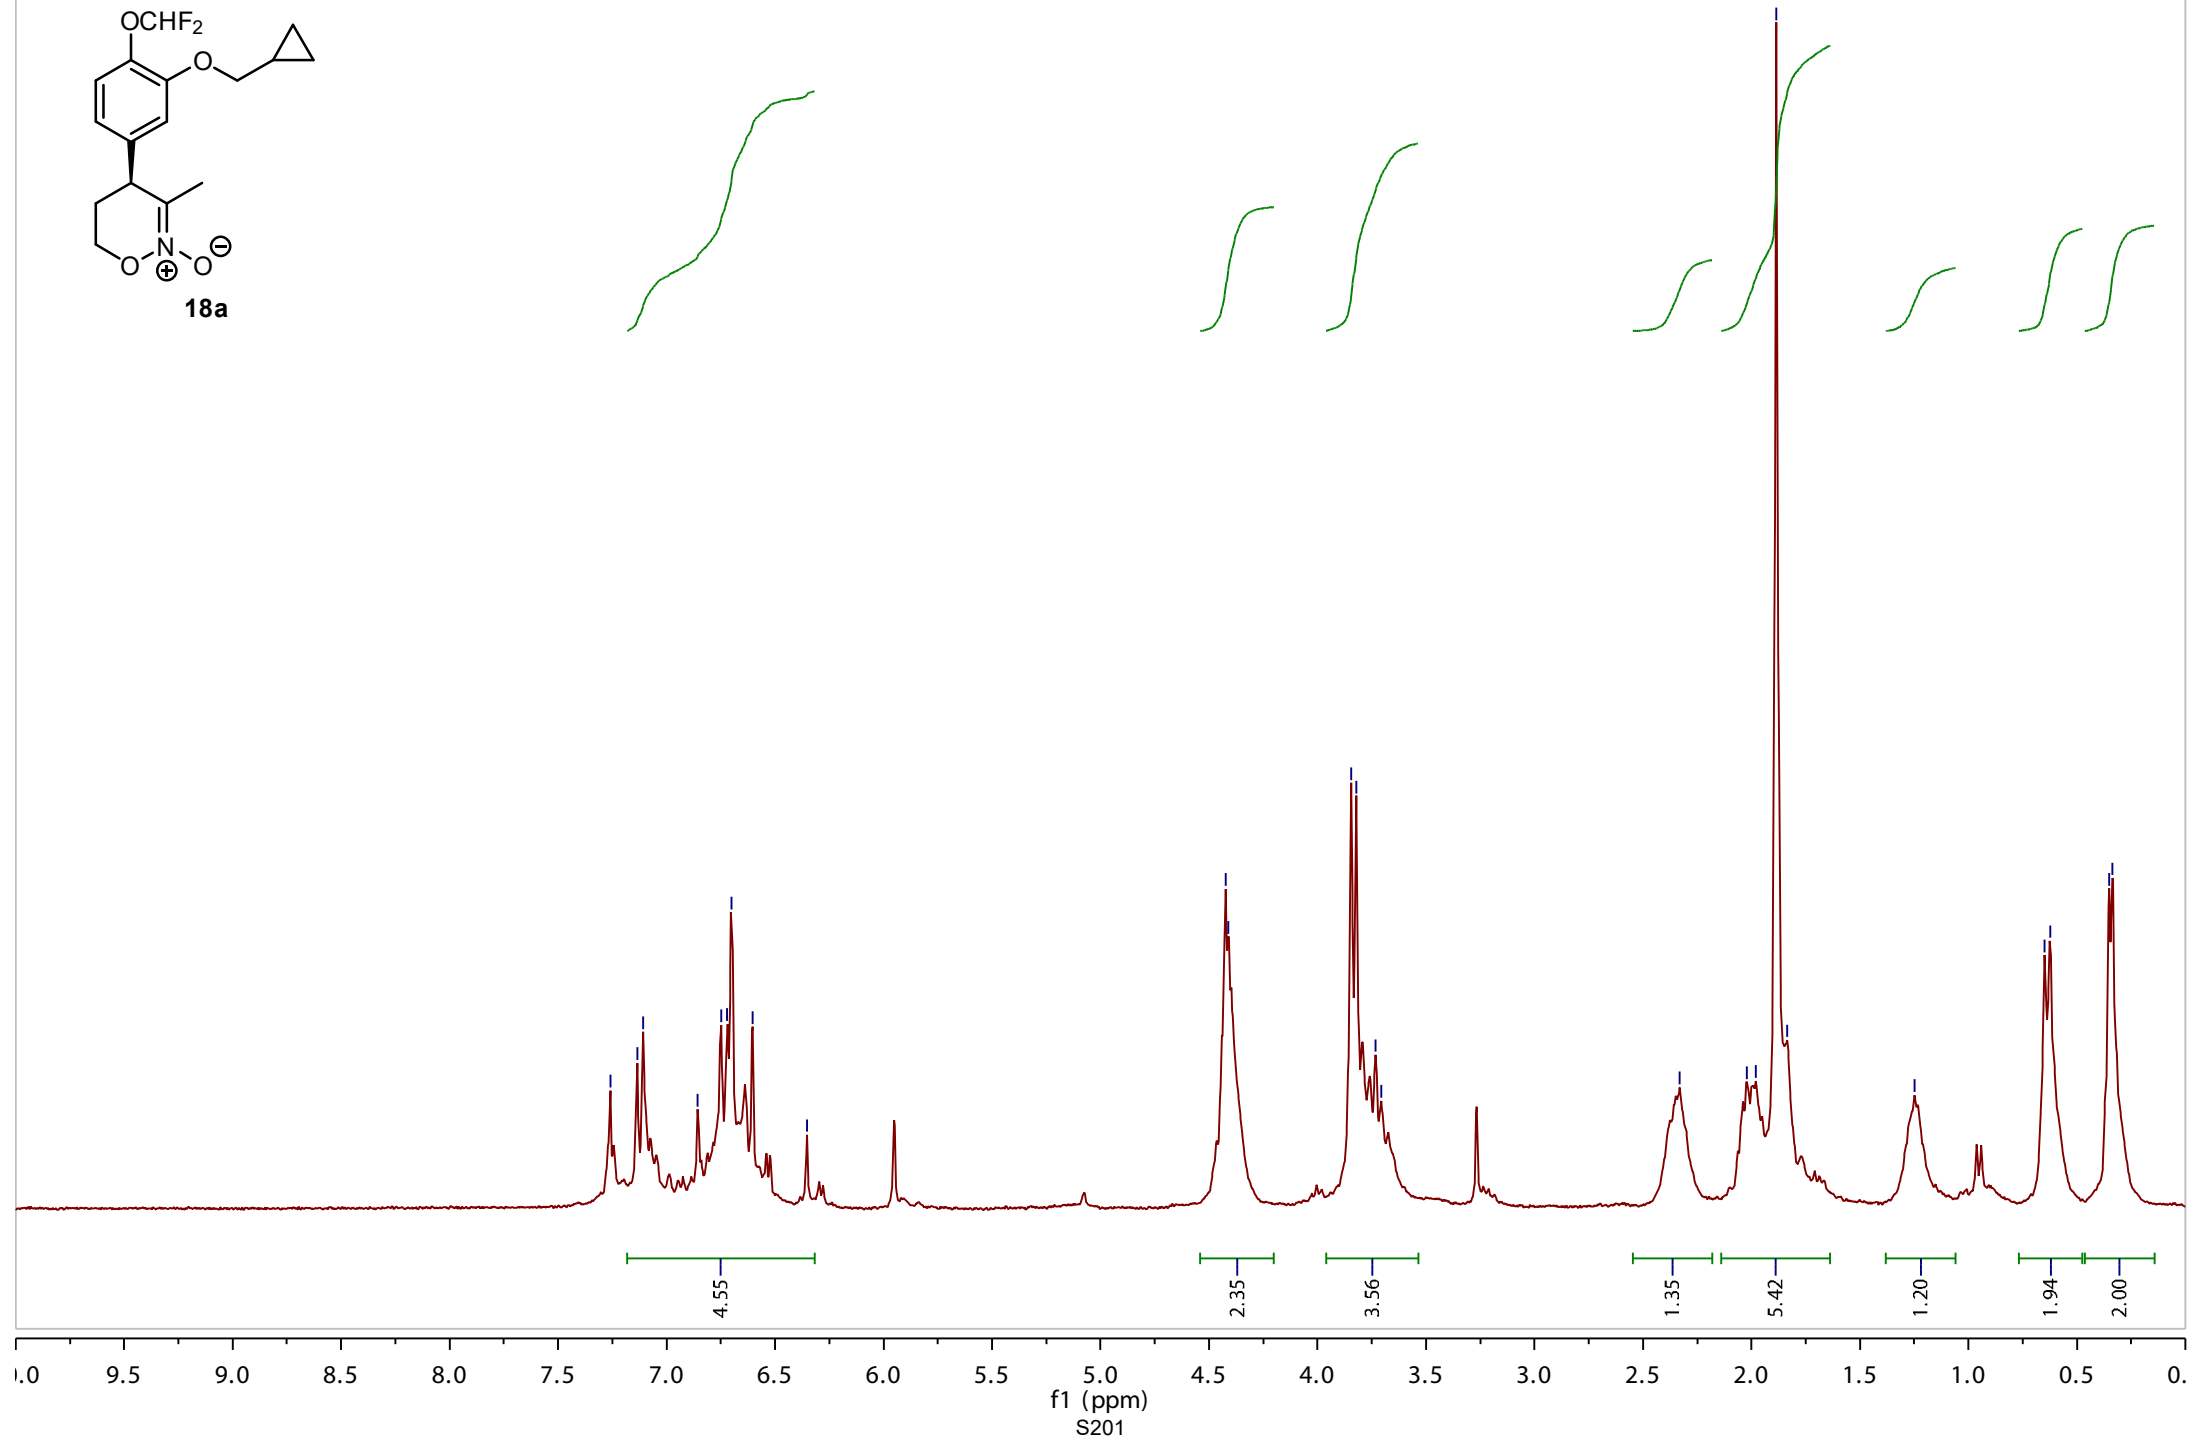

$^{13}\text{C}$  NMR (75 MHz,  $\text{CDCl}_3$ )

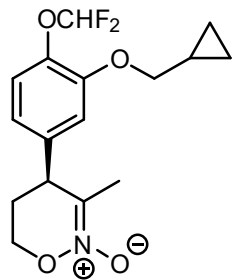

**18a**

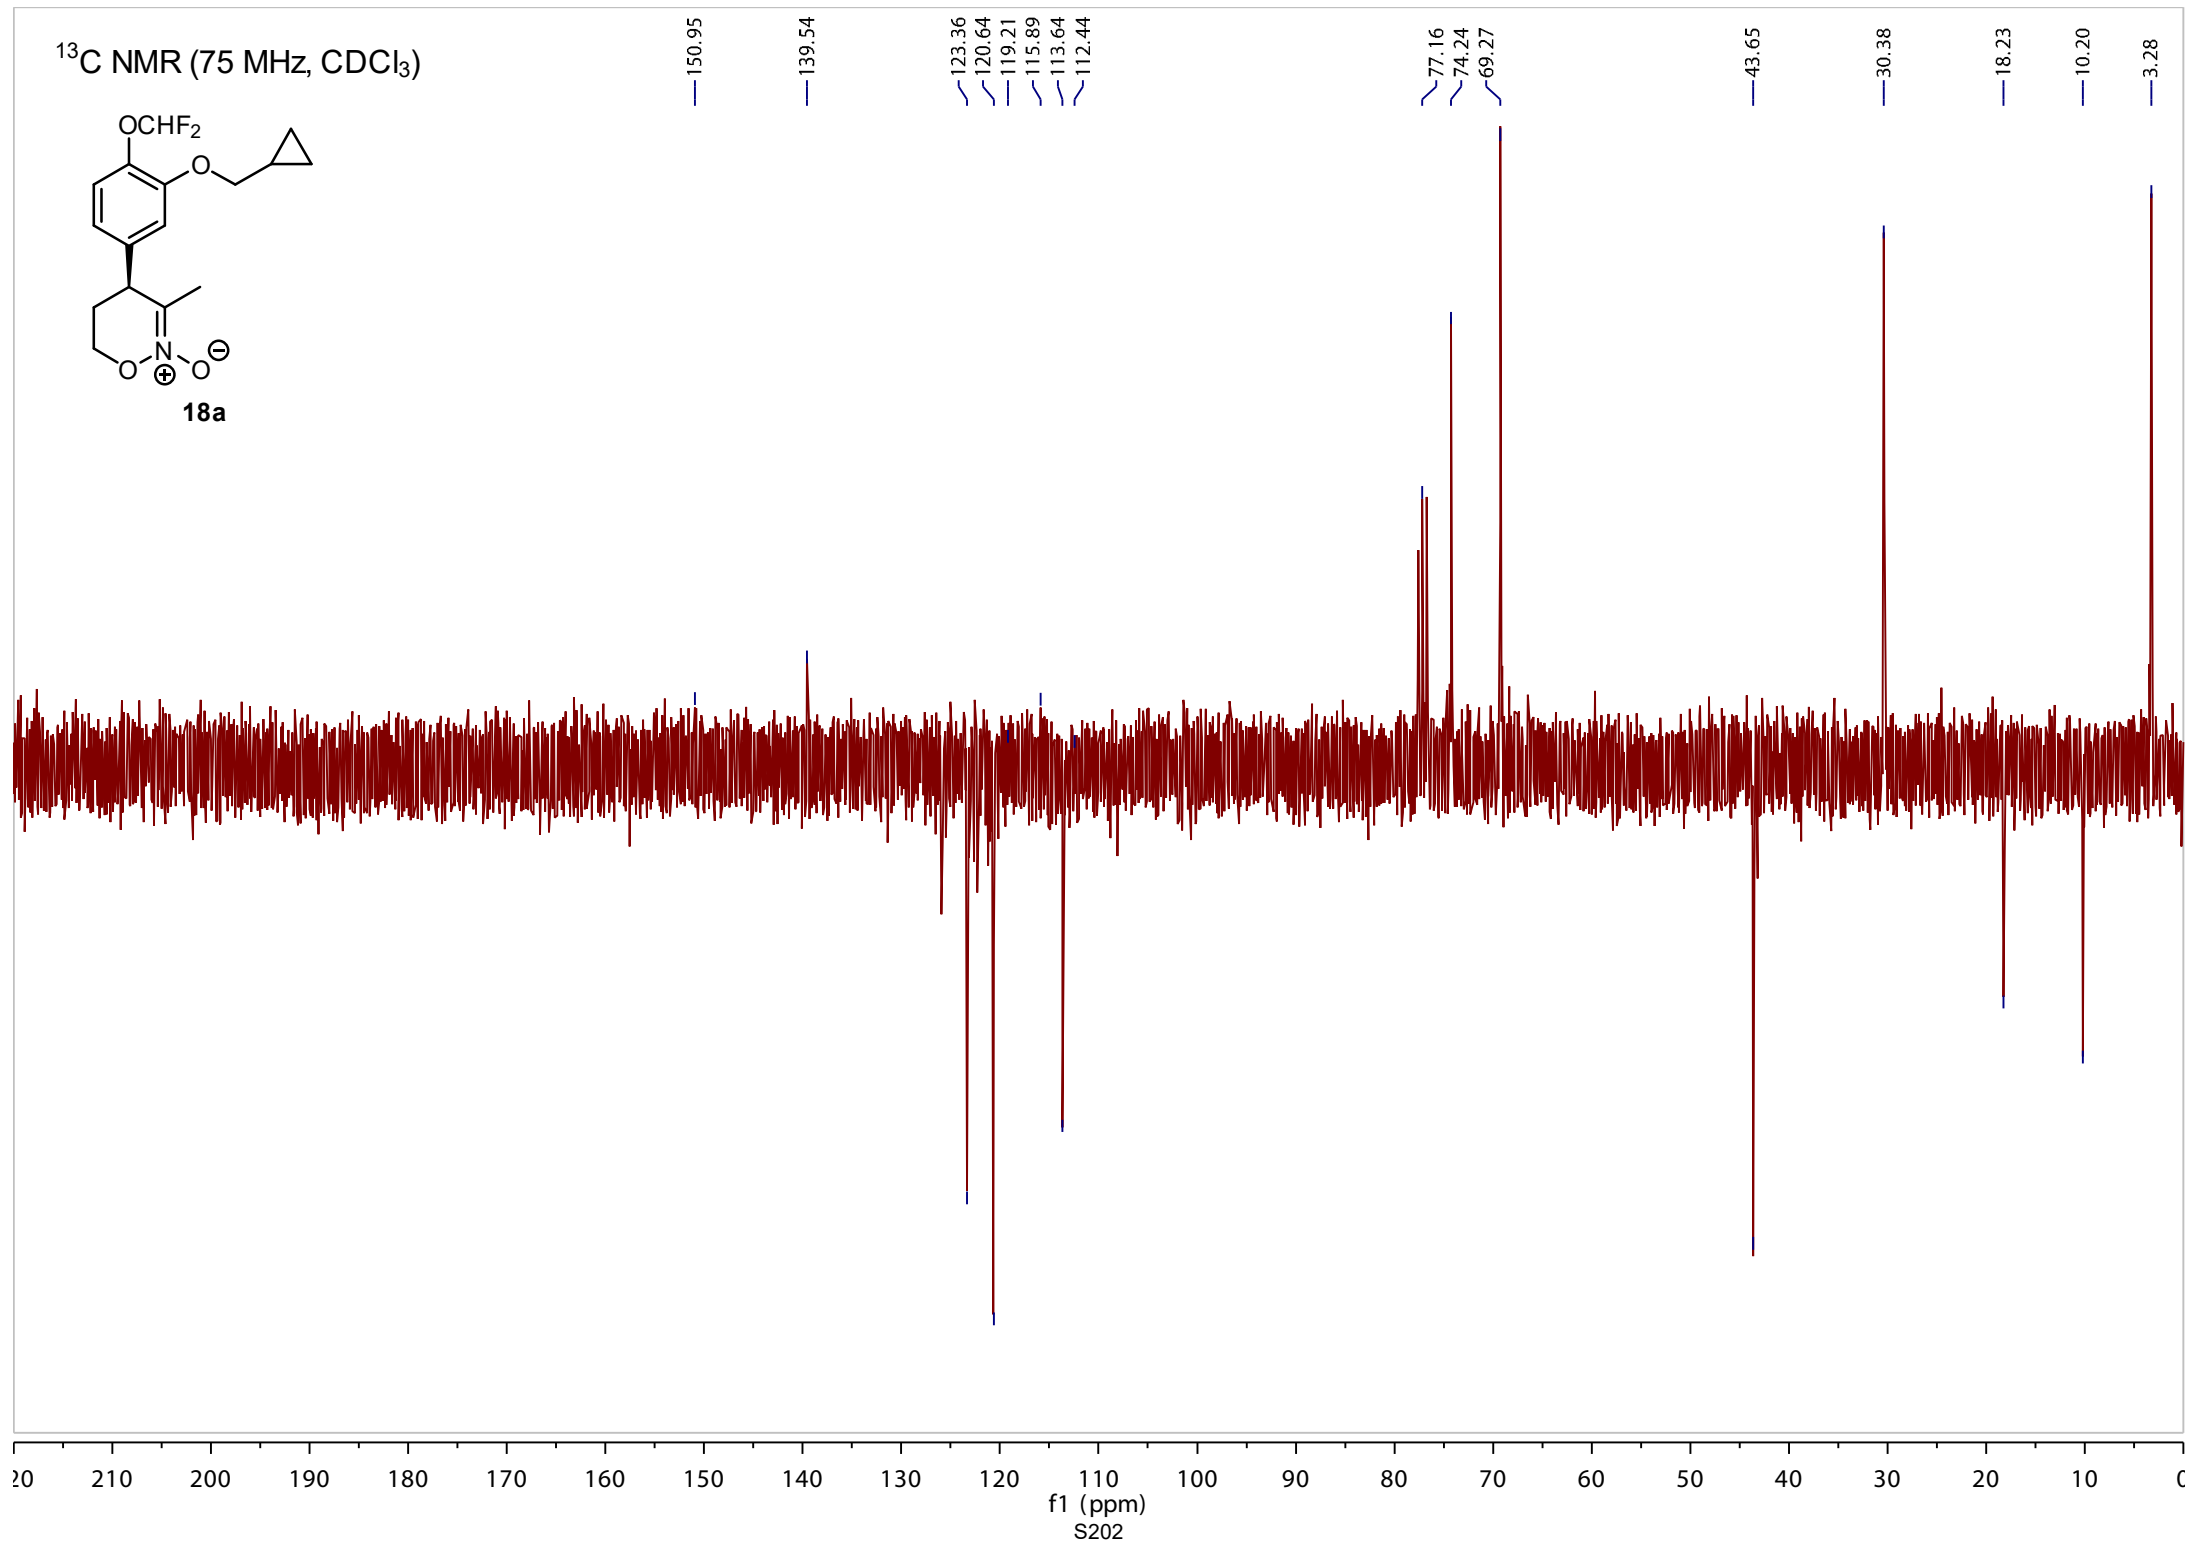

$^{19}\text{F}$  NMR (282 MHz,  $\text{CDCl}_3$ )

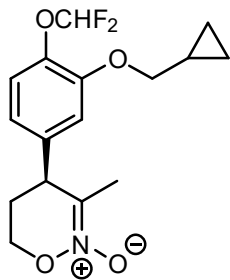

**18a**

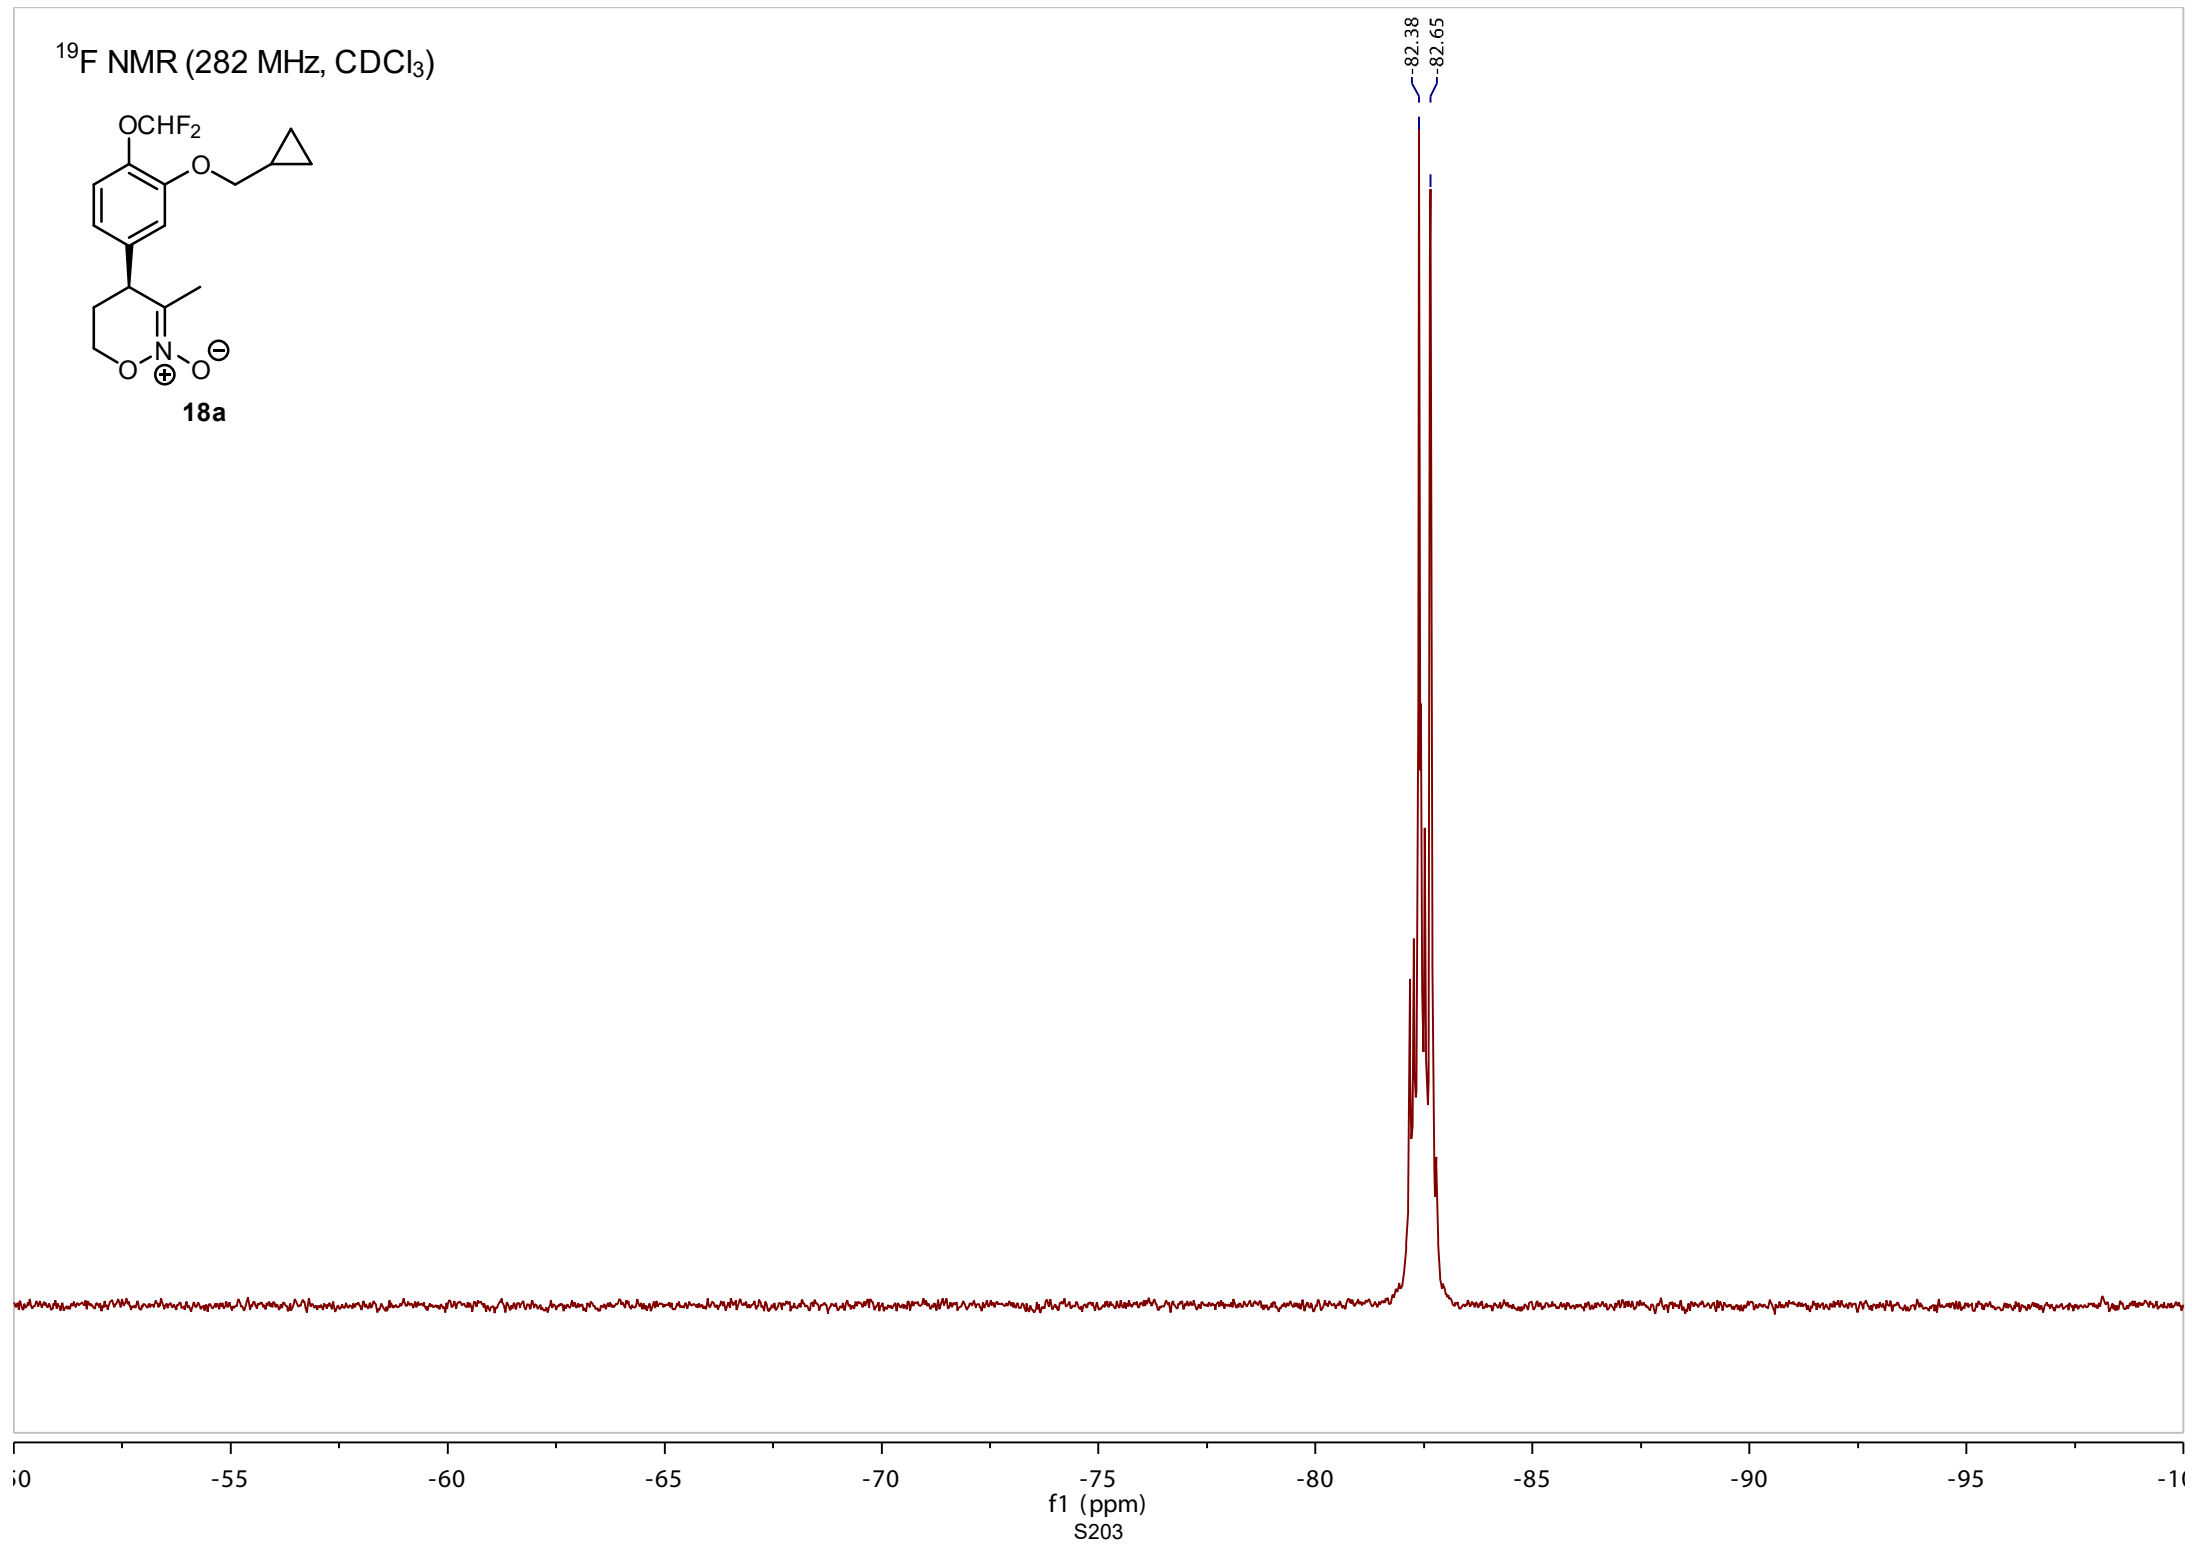

<sup>1</sup>H NMR (300 MHz, CDCl<sub>3</sub>)

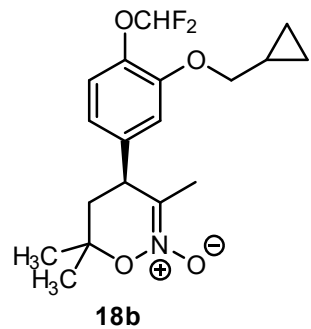

7.26  
7.14  
7.11  
6.87  
6.76  
6.73  
6.69  
6.62  
6.37

3.85  
3.83  
3.69  
3.66  
3.63

2.17  
2.15  
2.12  
2.10  
2.07  
1.96  
1.92  
1.88  
1.45  
1.42  
1.26

0.67  
0.64  
0.37  
0.35

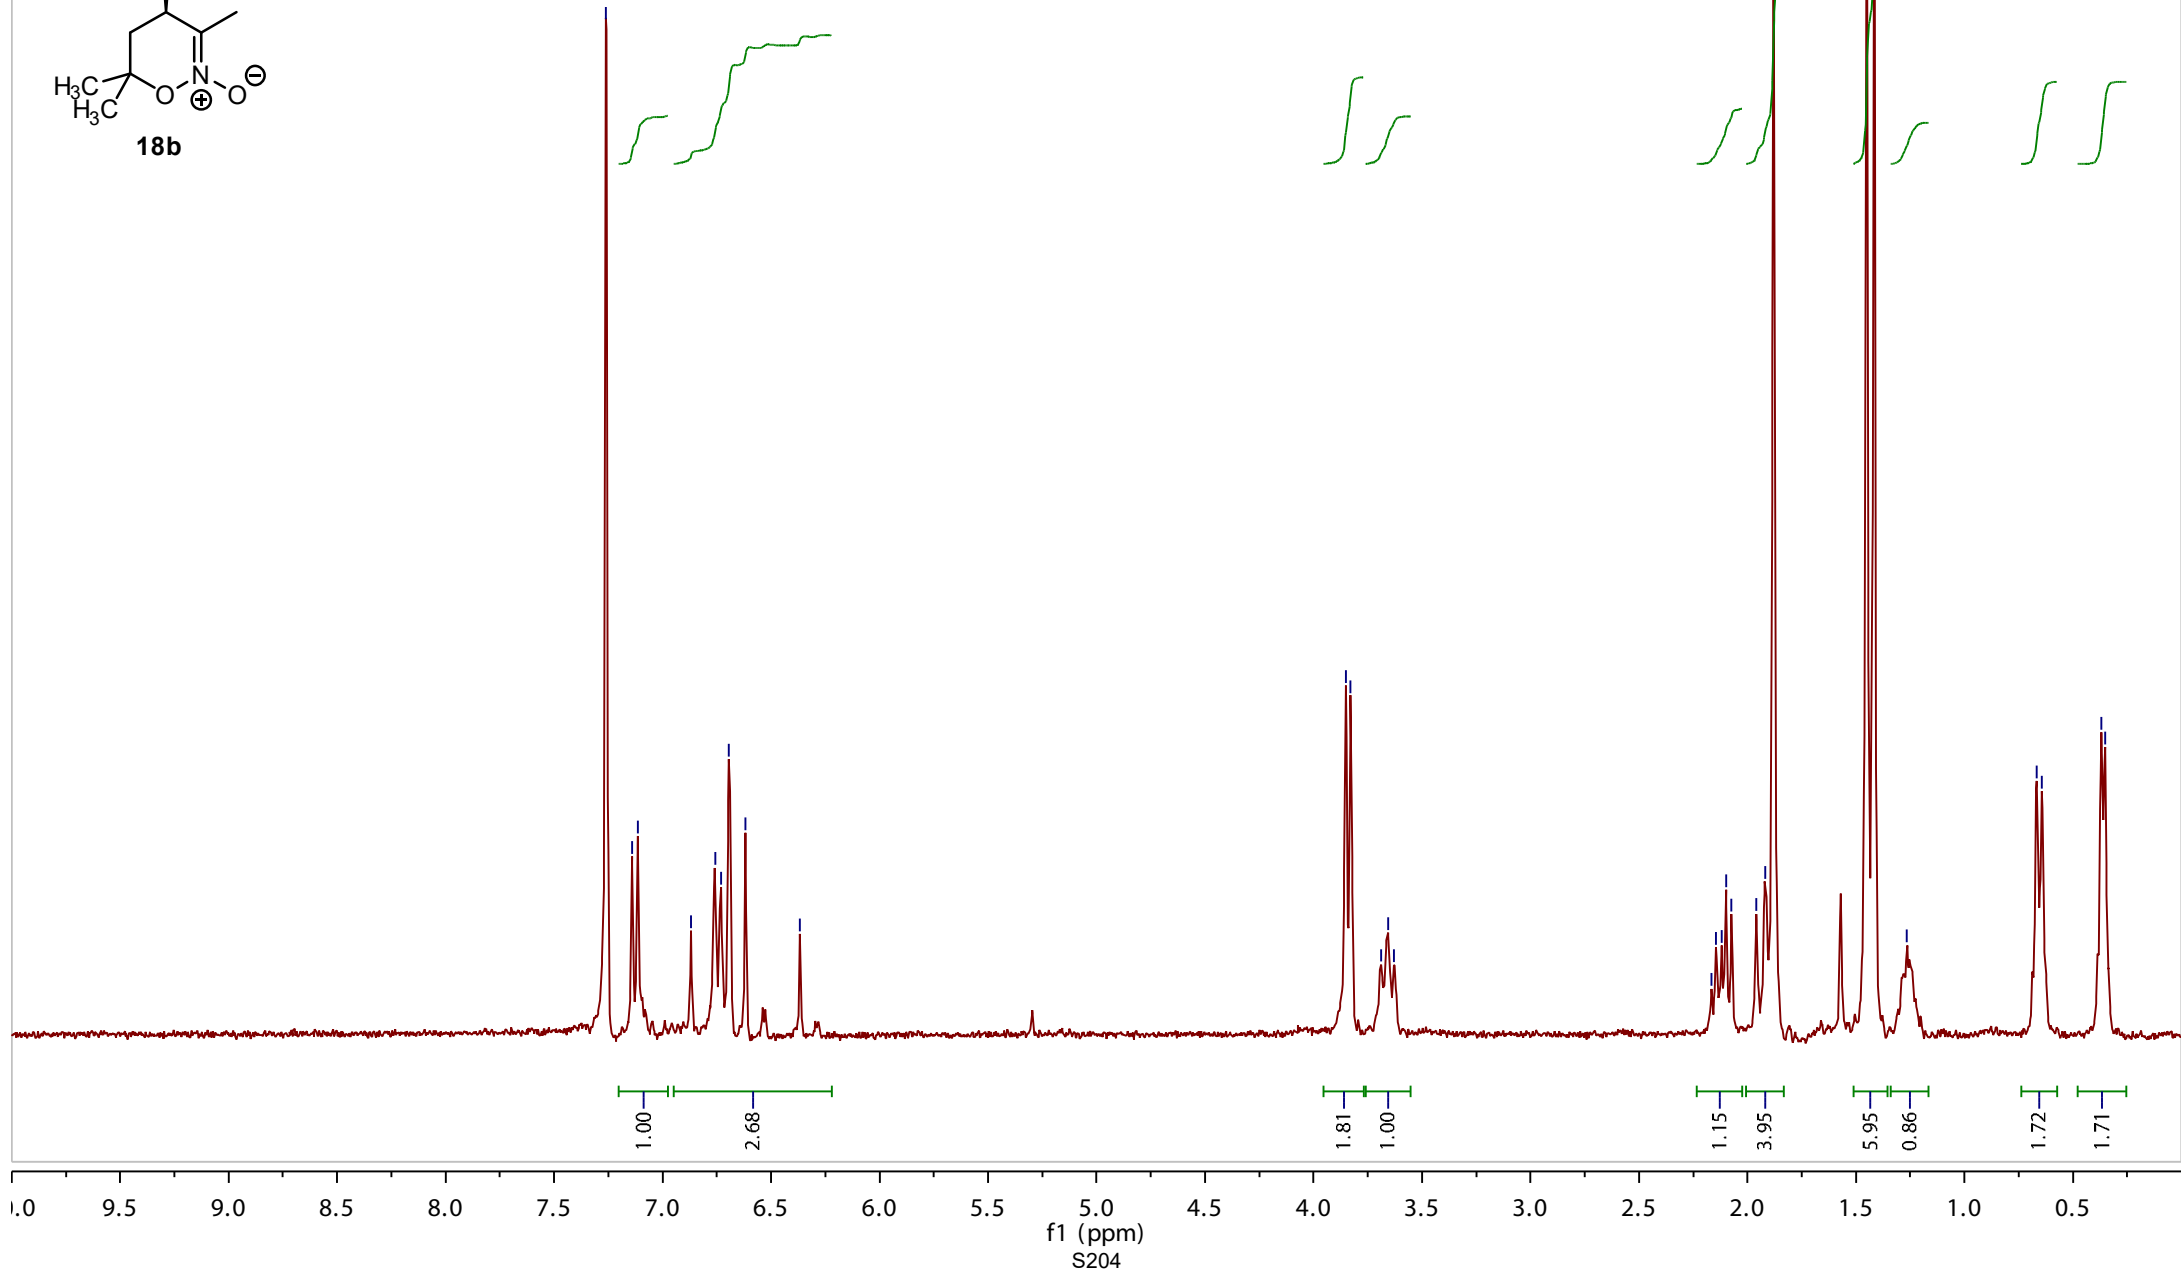

$^{13}\text{C}$  NMR (75 MHz,  $\text{CDCl}_3$ )

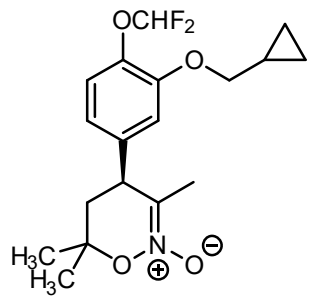

151.36

139.92  
139.06

123.37

121.45

120.77

119.64

116.19

113.57

112.75

81.39

77.58  $\text{CDCl}_3$

77.16  $\text{CDCl}_3$

76.74  $\text{CDCl}_3$

74.26

43.22

41.76

27.89

22.21

17.35

10.22

3.31

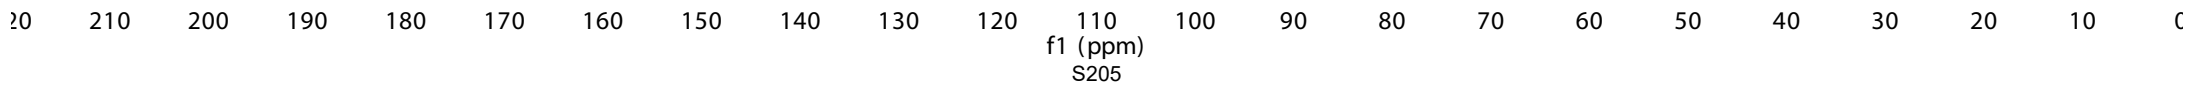

$^{19}\text{F}$  NMR (282 MHz,  $\text{CDCl}_3$ )

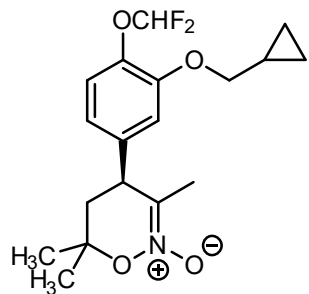

82.39  
82.66

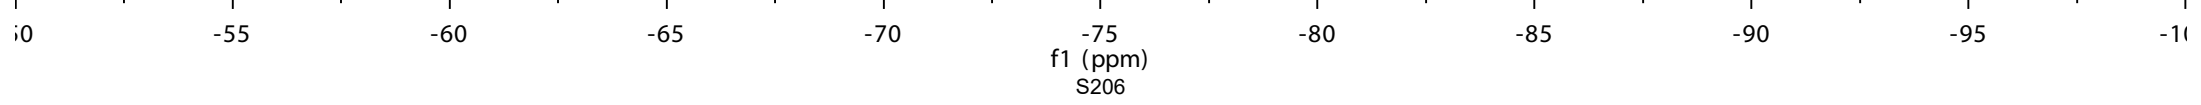

<sup>1</sup>H NMR (300 MHz, CDCl<sub>3</sub>)

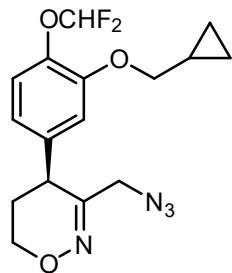

**21a**

7.26  
7.14  
7.11  
6.86  
6.74  
6.71  
6.60  
6.35

4.07  
4.06  
4.04  
3.86  
3.83  
3.64  
3.61  
3.59

2.31  
2.28  
2.00  
1.97

1.25

0.64  
0.62  
0.35  
0.33

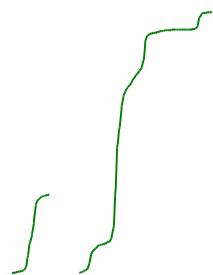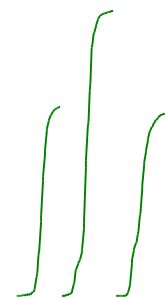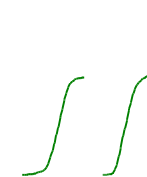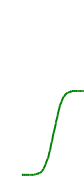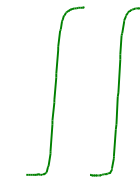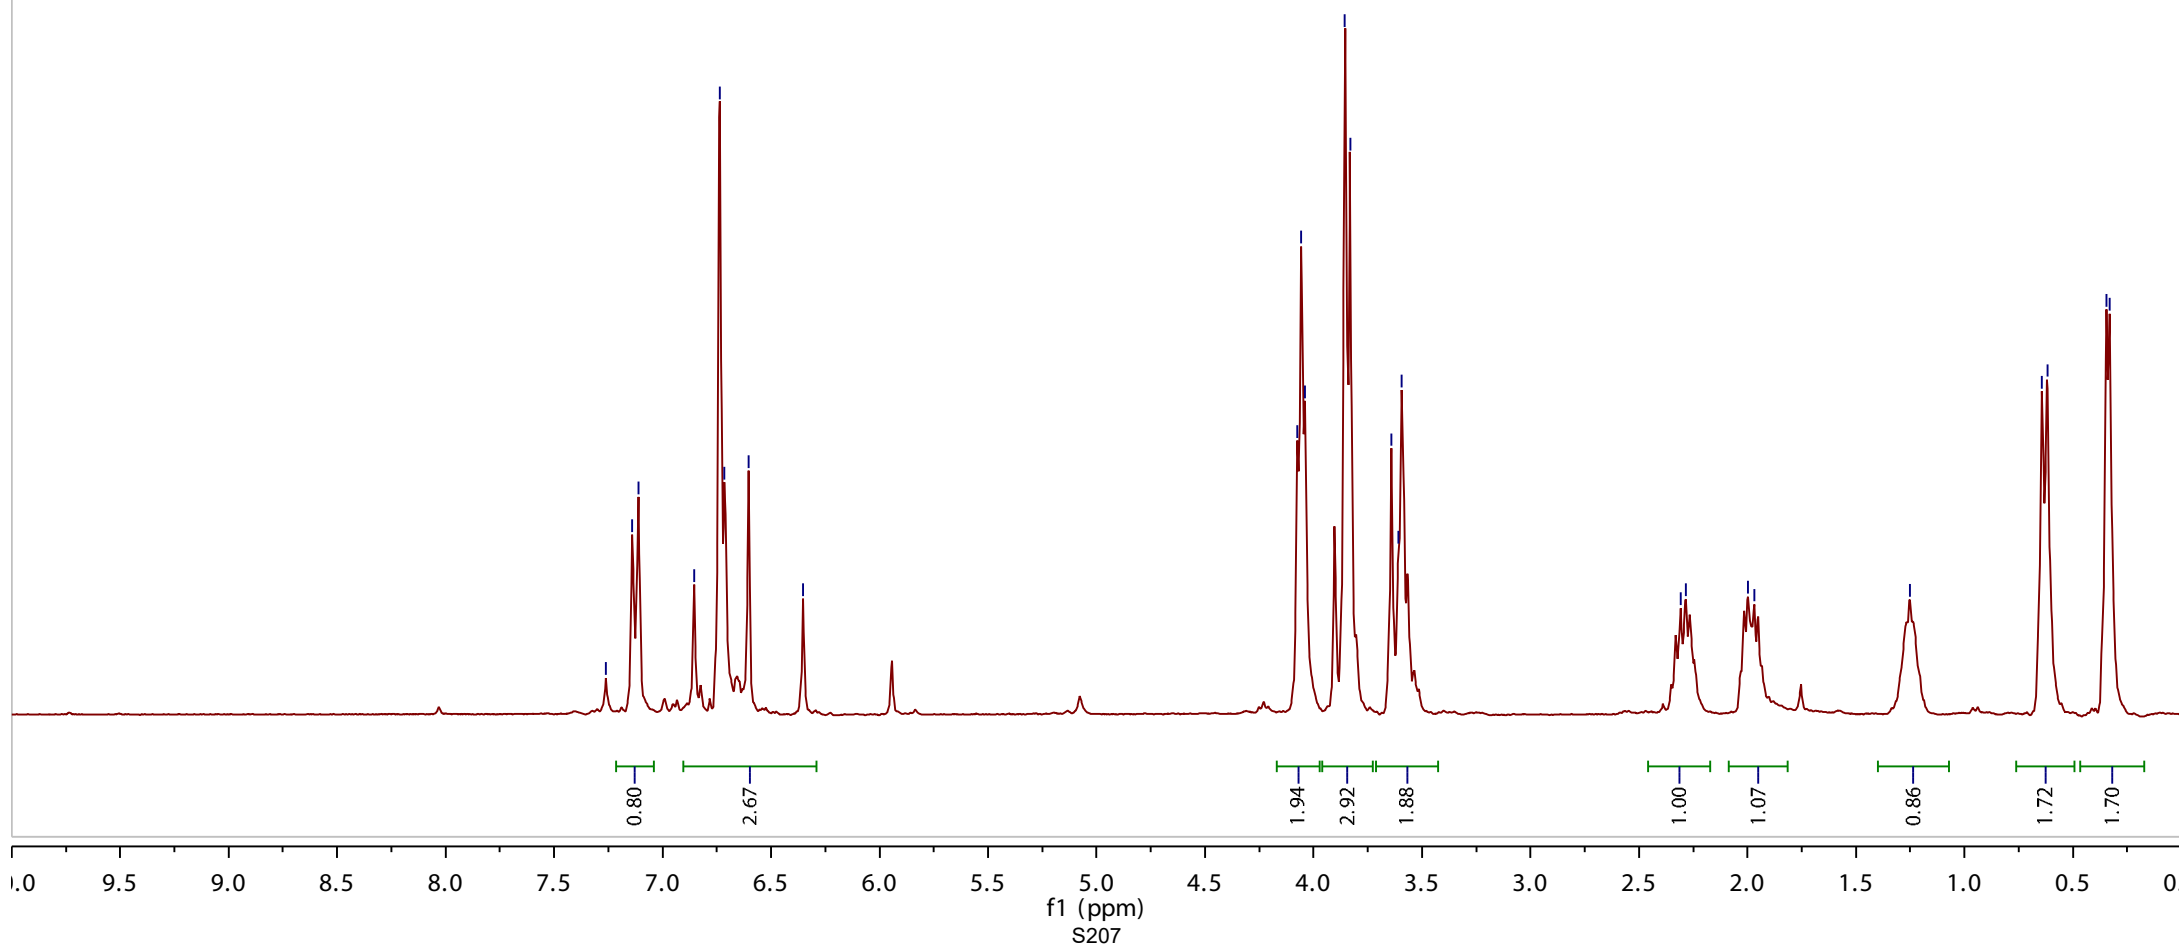

<sup>13</sup>C NMR (75 MHz, CDCl<sub>3</sub>)

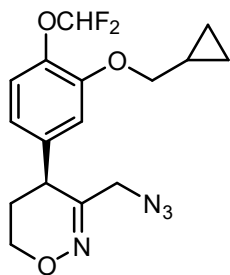

**21a**

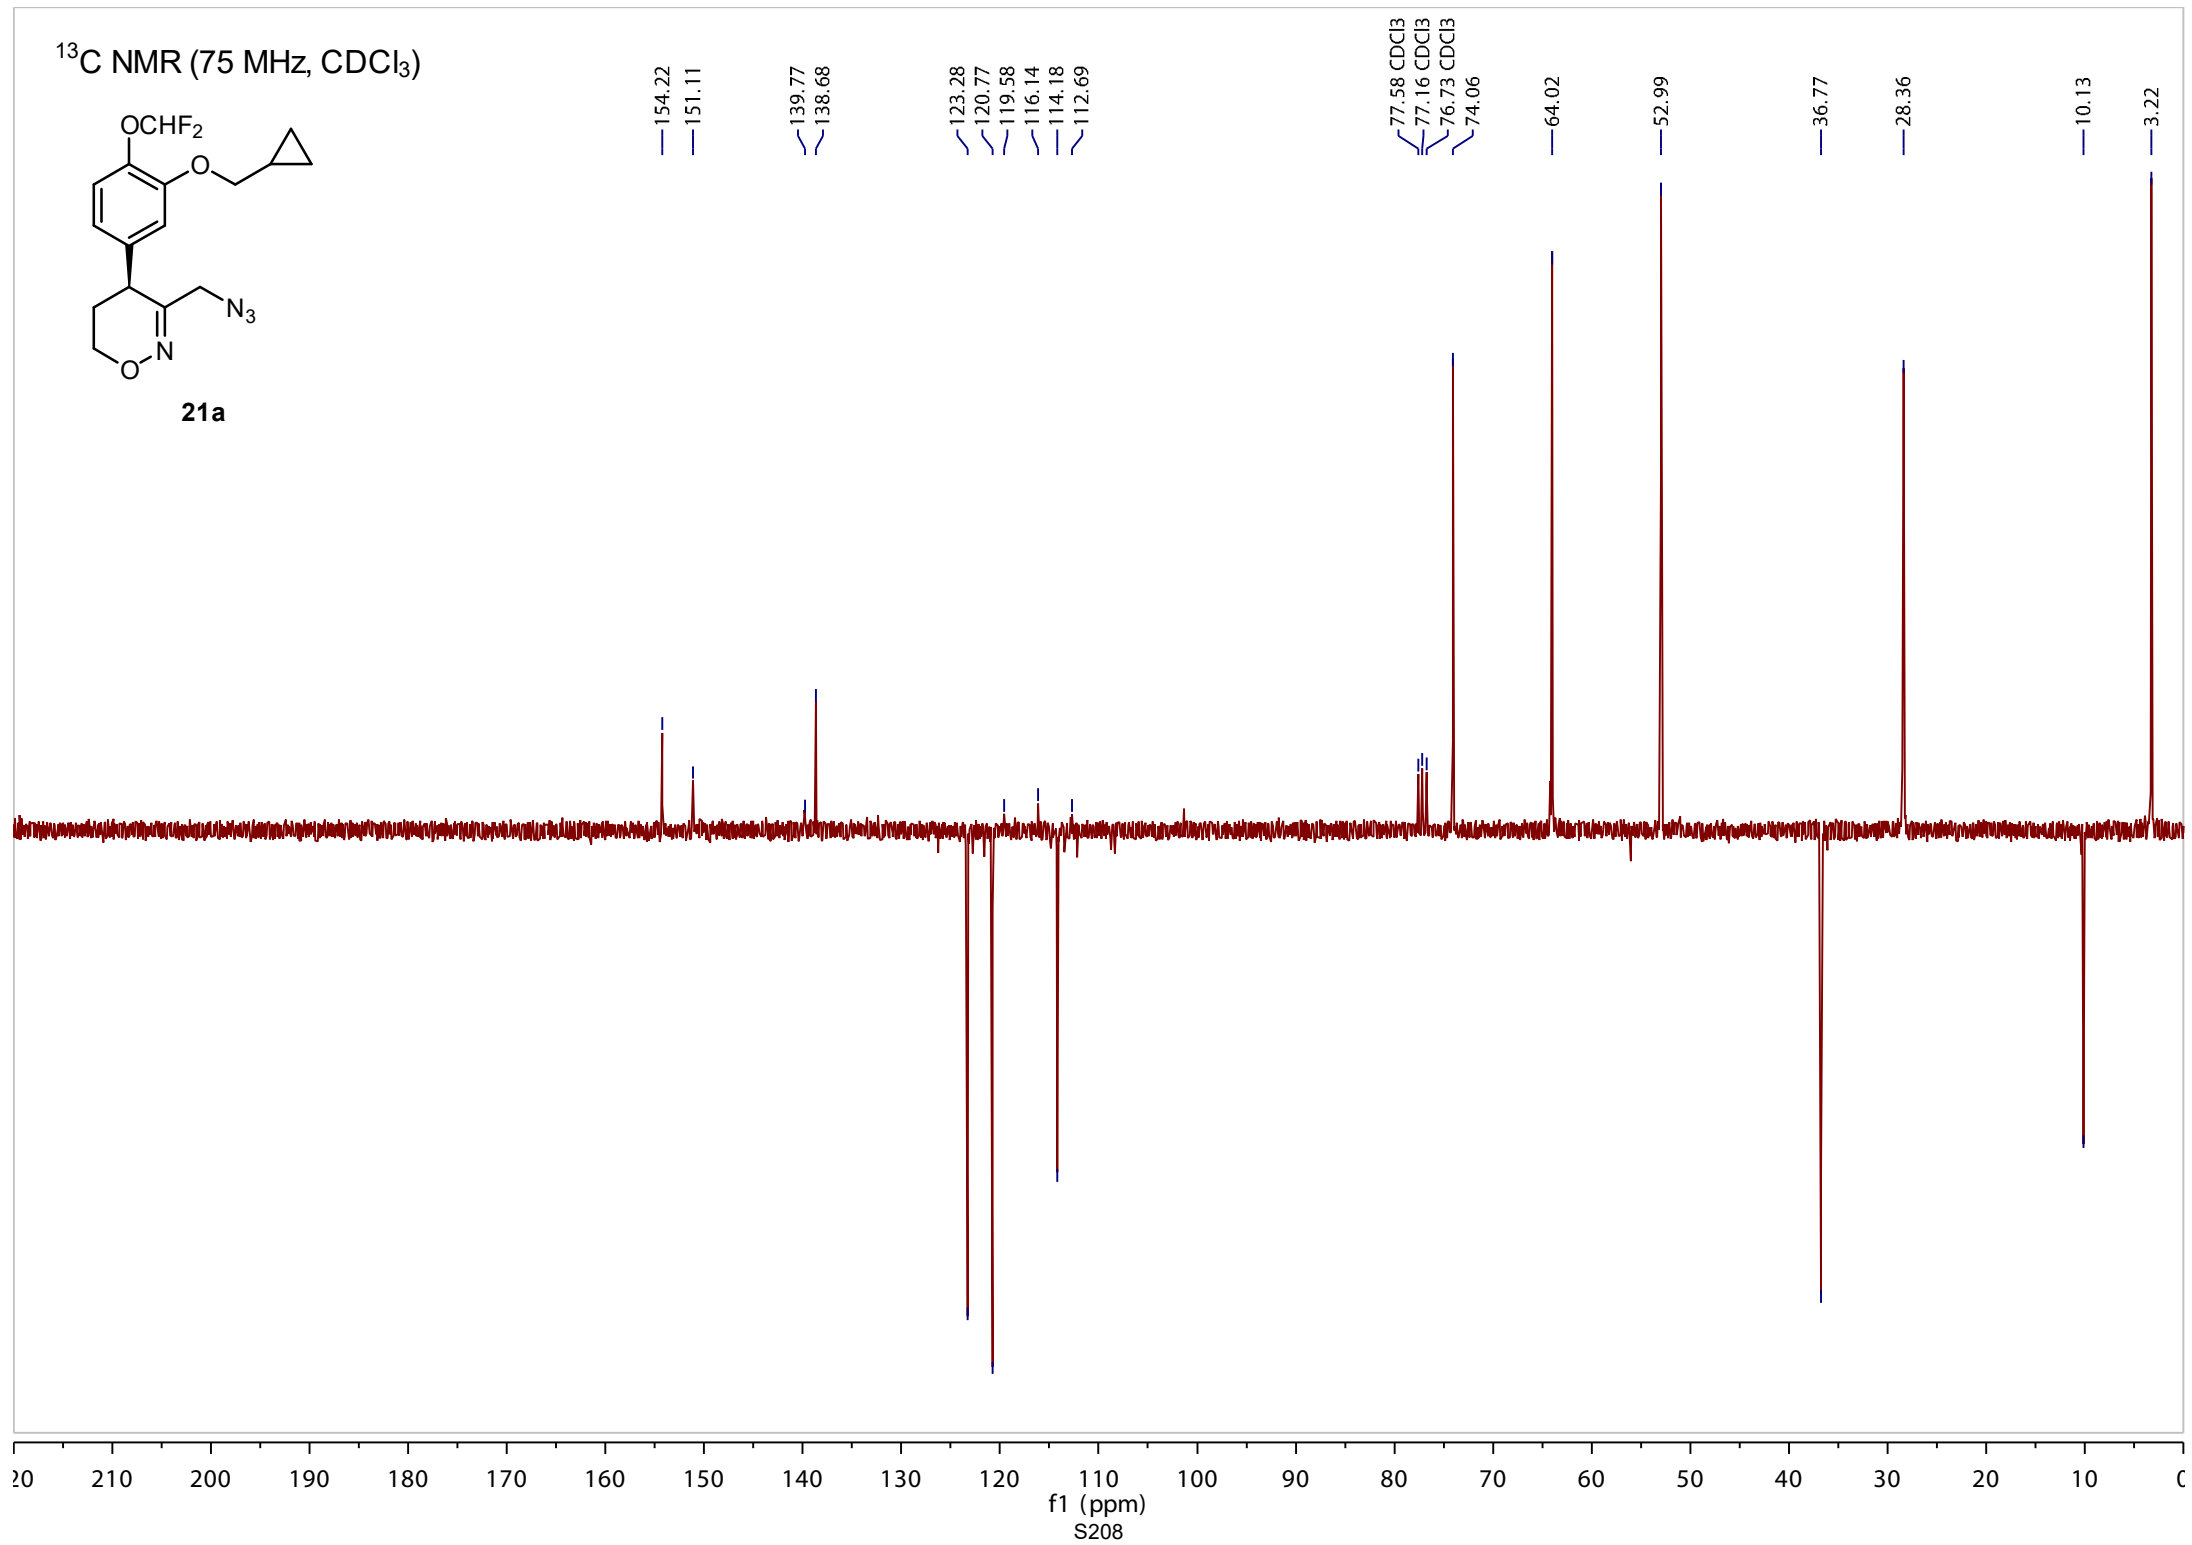



$^{19}\text{F}$  NMR (282 MHz,  $\text{CDCl}_3$ )

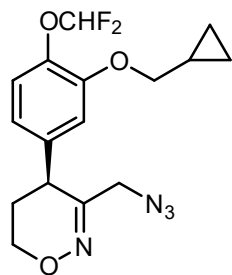

**21a**

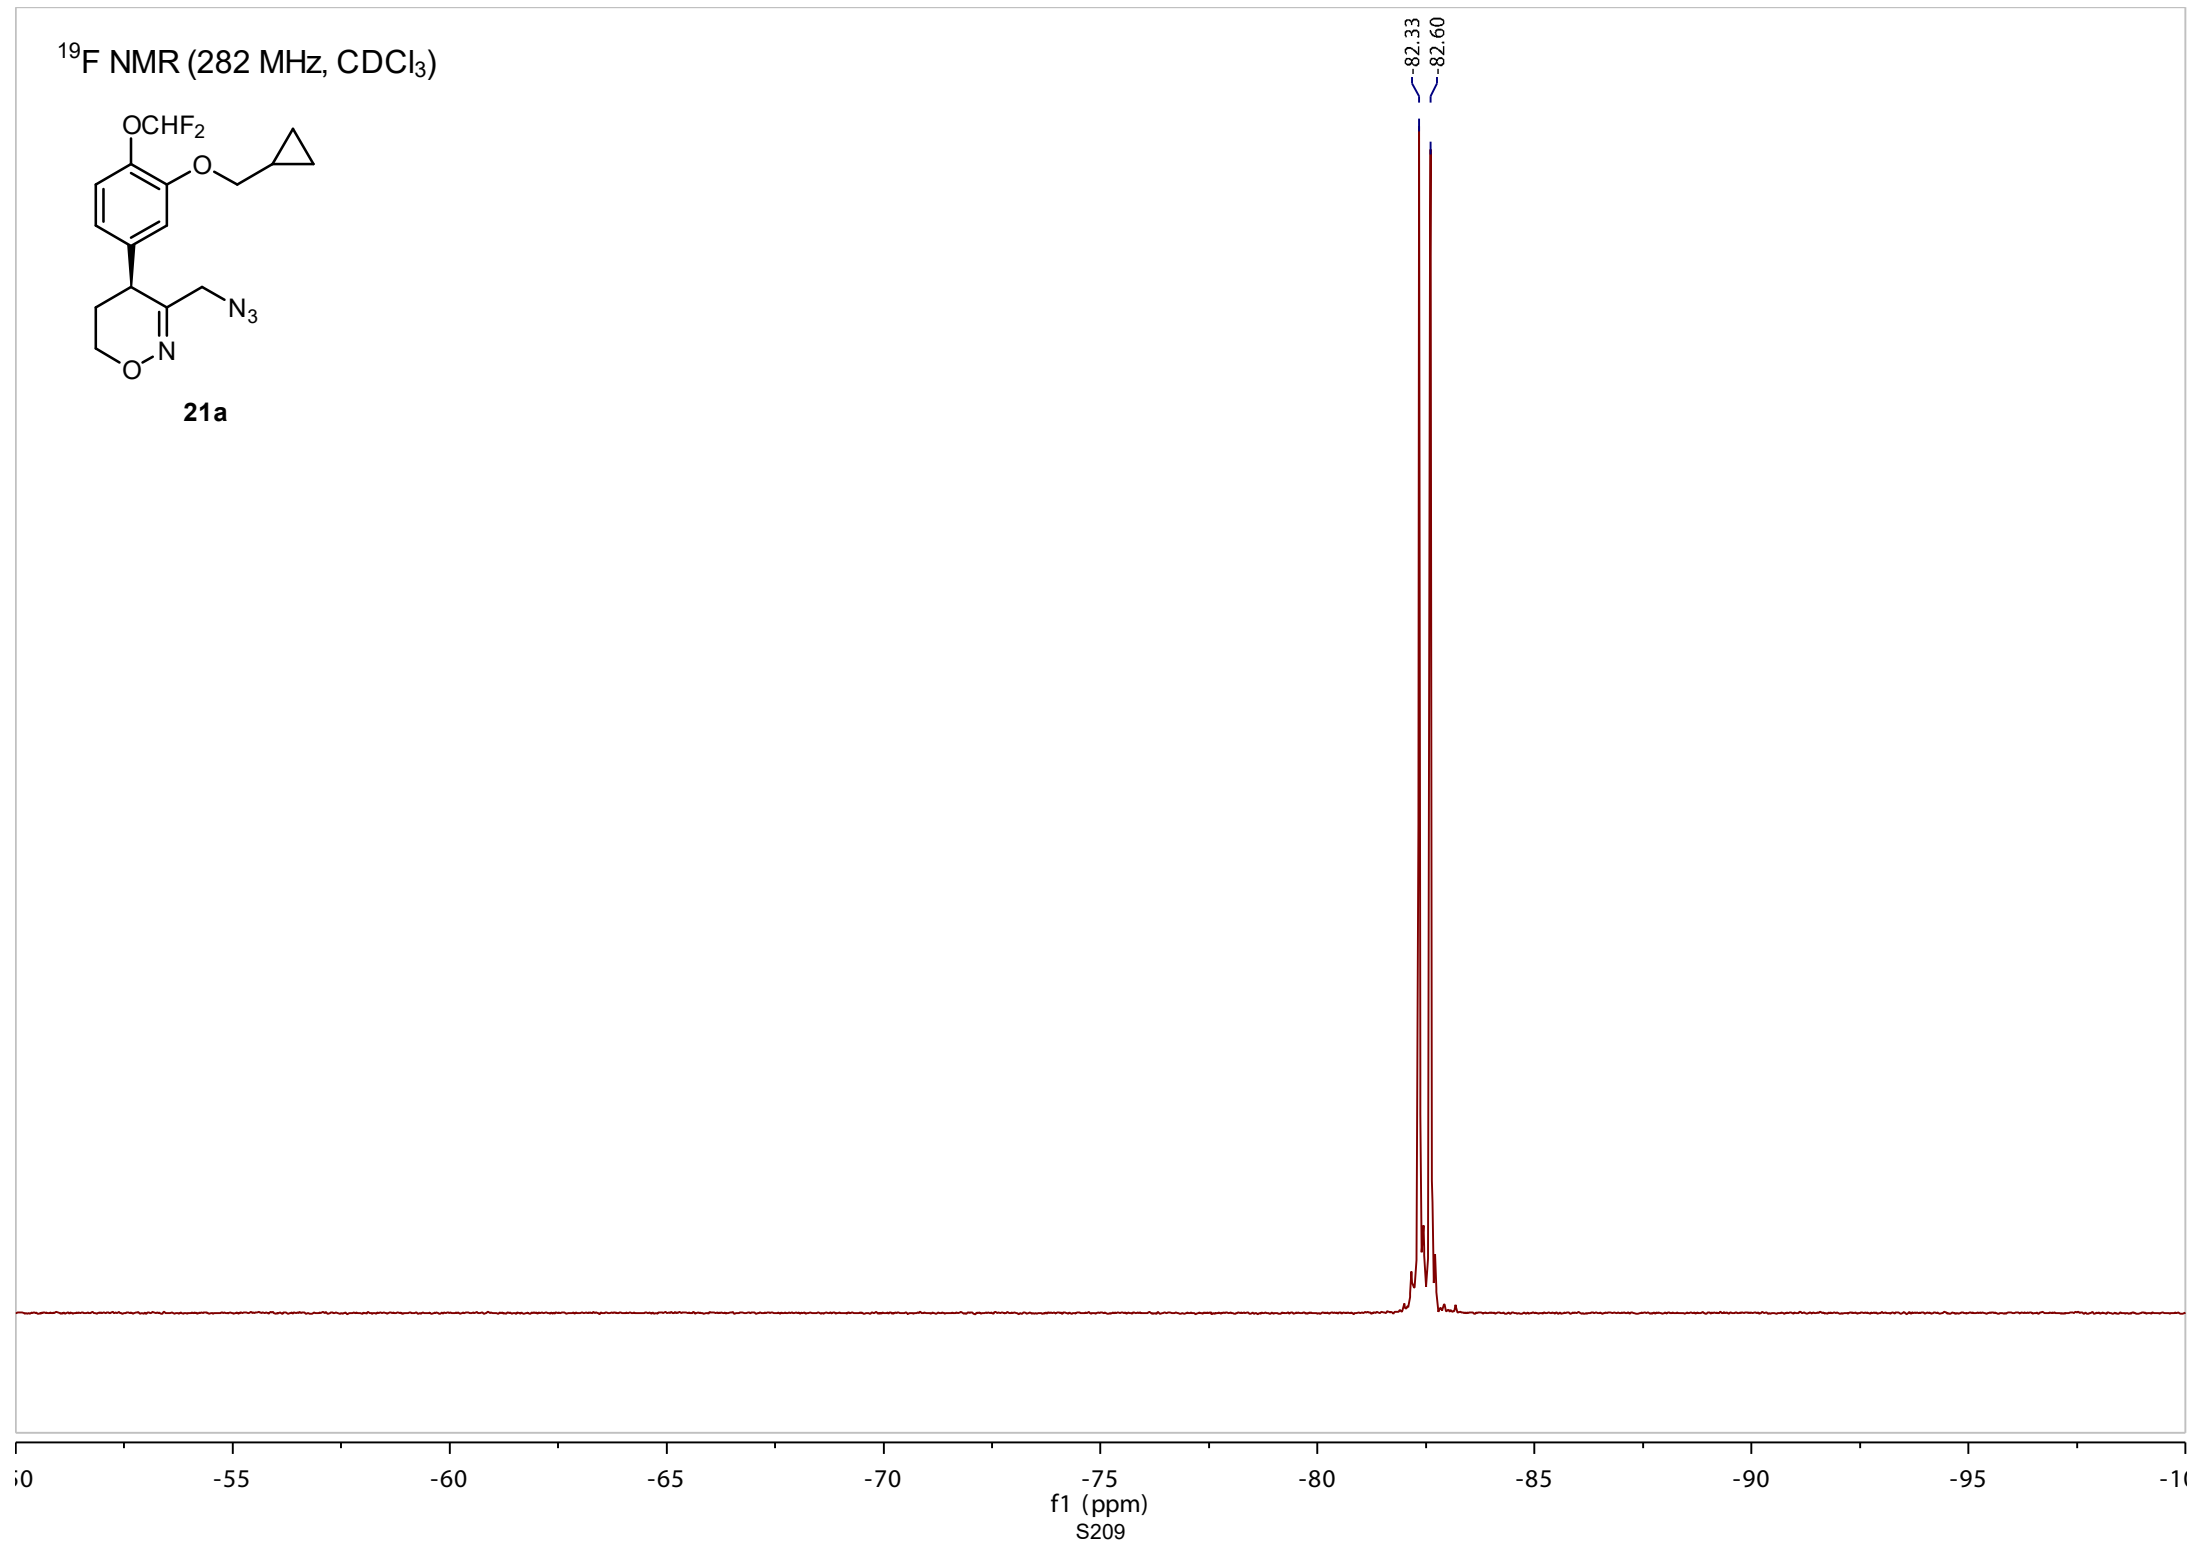

<sup>1</sup>H NMR (300 MHz, CDCl<sub>3</sub>)

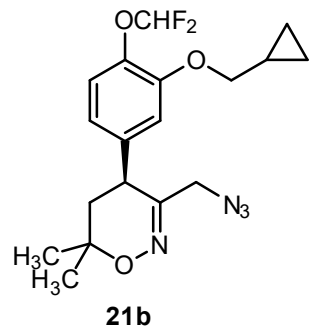

7.26  
7.16  
7.13  
6.87  
6.78  
6.77  
6.75  
6.74  
6.62  
6.37

3.91  
3.86  
3.84  
3.58  
3.55  
3.54  
3.51  
3.49

2.17  
2.14  
2.12  
2.10  
2.07  
1.94  
1.92  
1.90  
1.85  
1.39  
1.31  
1.27  
1.26

0.69  
0.67  
0.64  
0.62  
0.38  
0.37  
0.35  
0.33

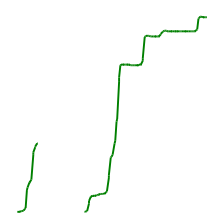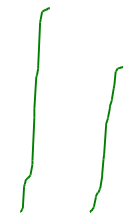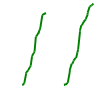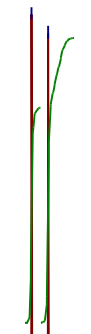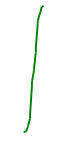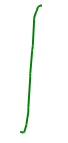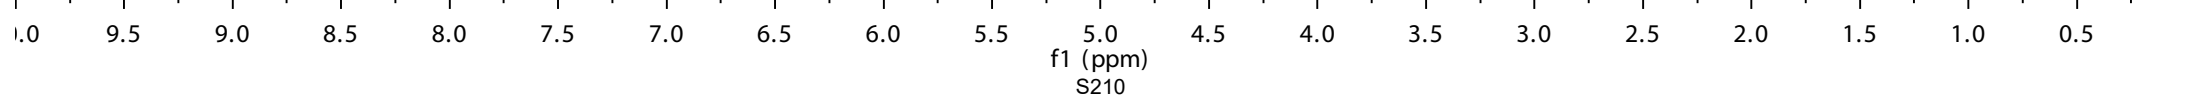

$^{13}\text{C}$  NMR (75 MHz,  $\text{CDCl}_3$ )

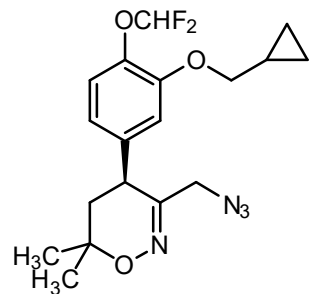

**21b**

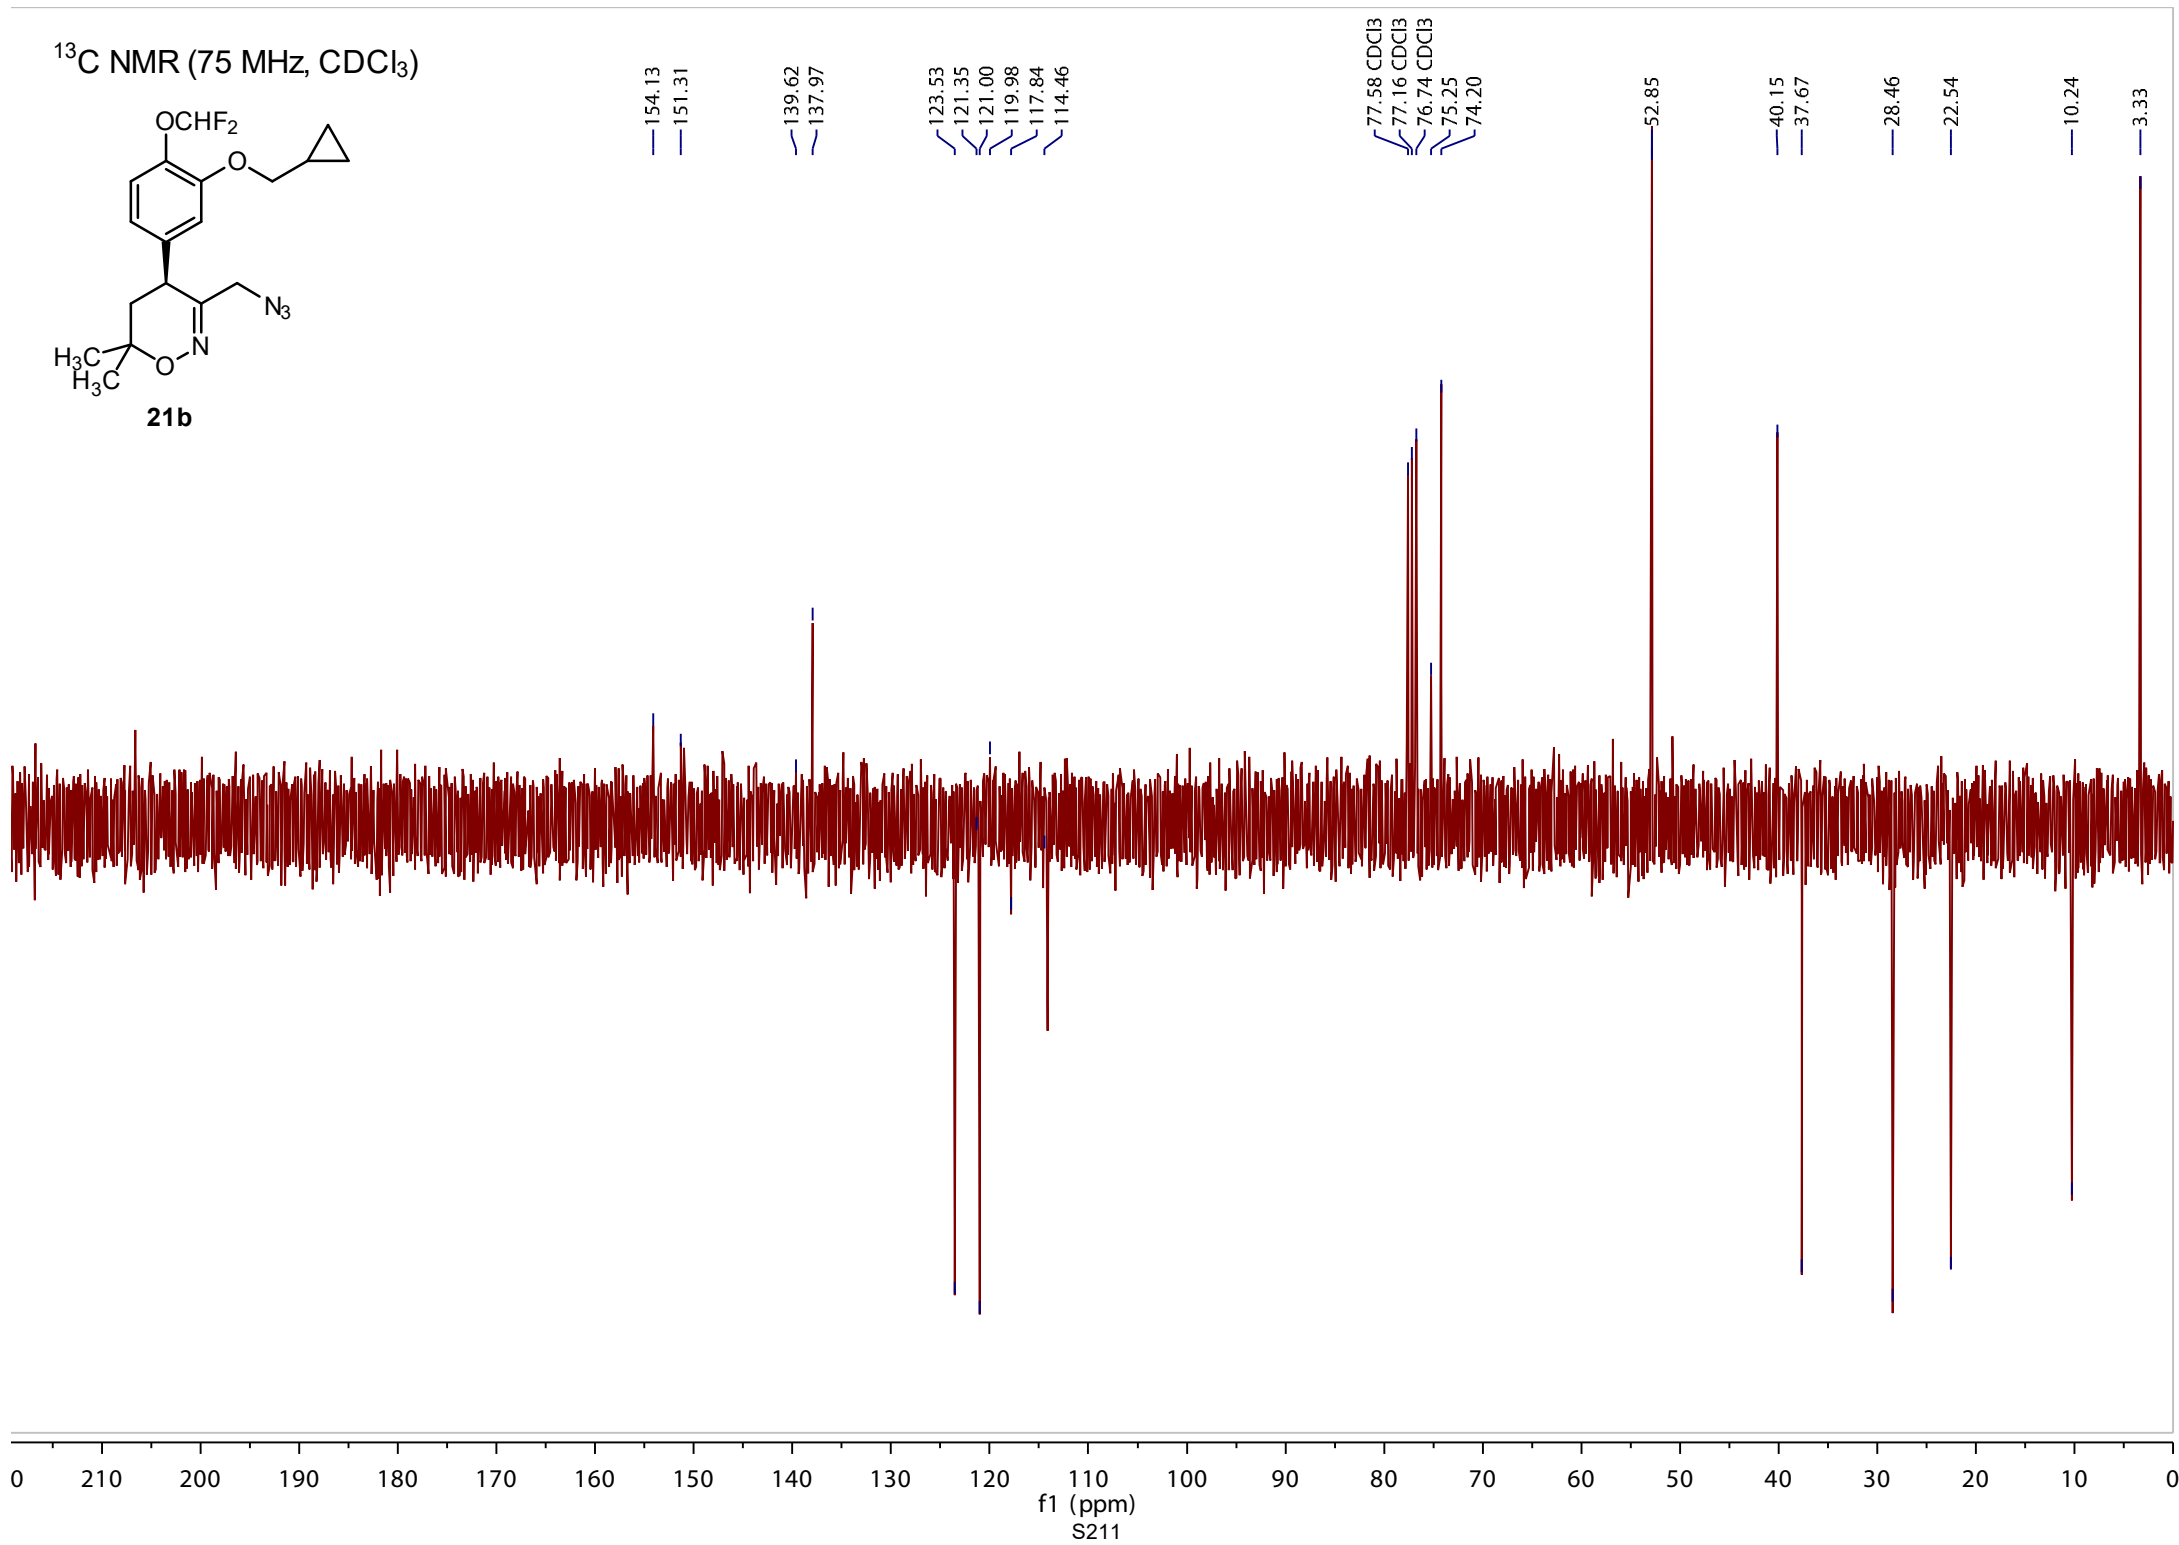

$^{19}\text{F}$  NMR (282 MHz,  $\text{CDCl}_3$ )

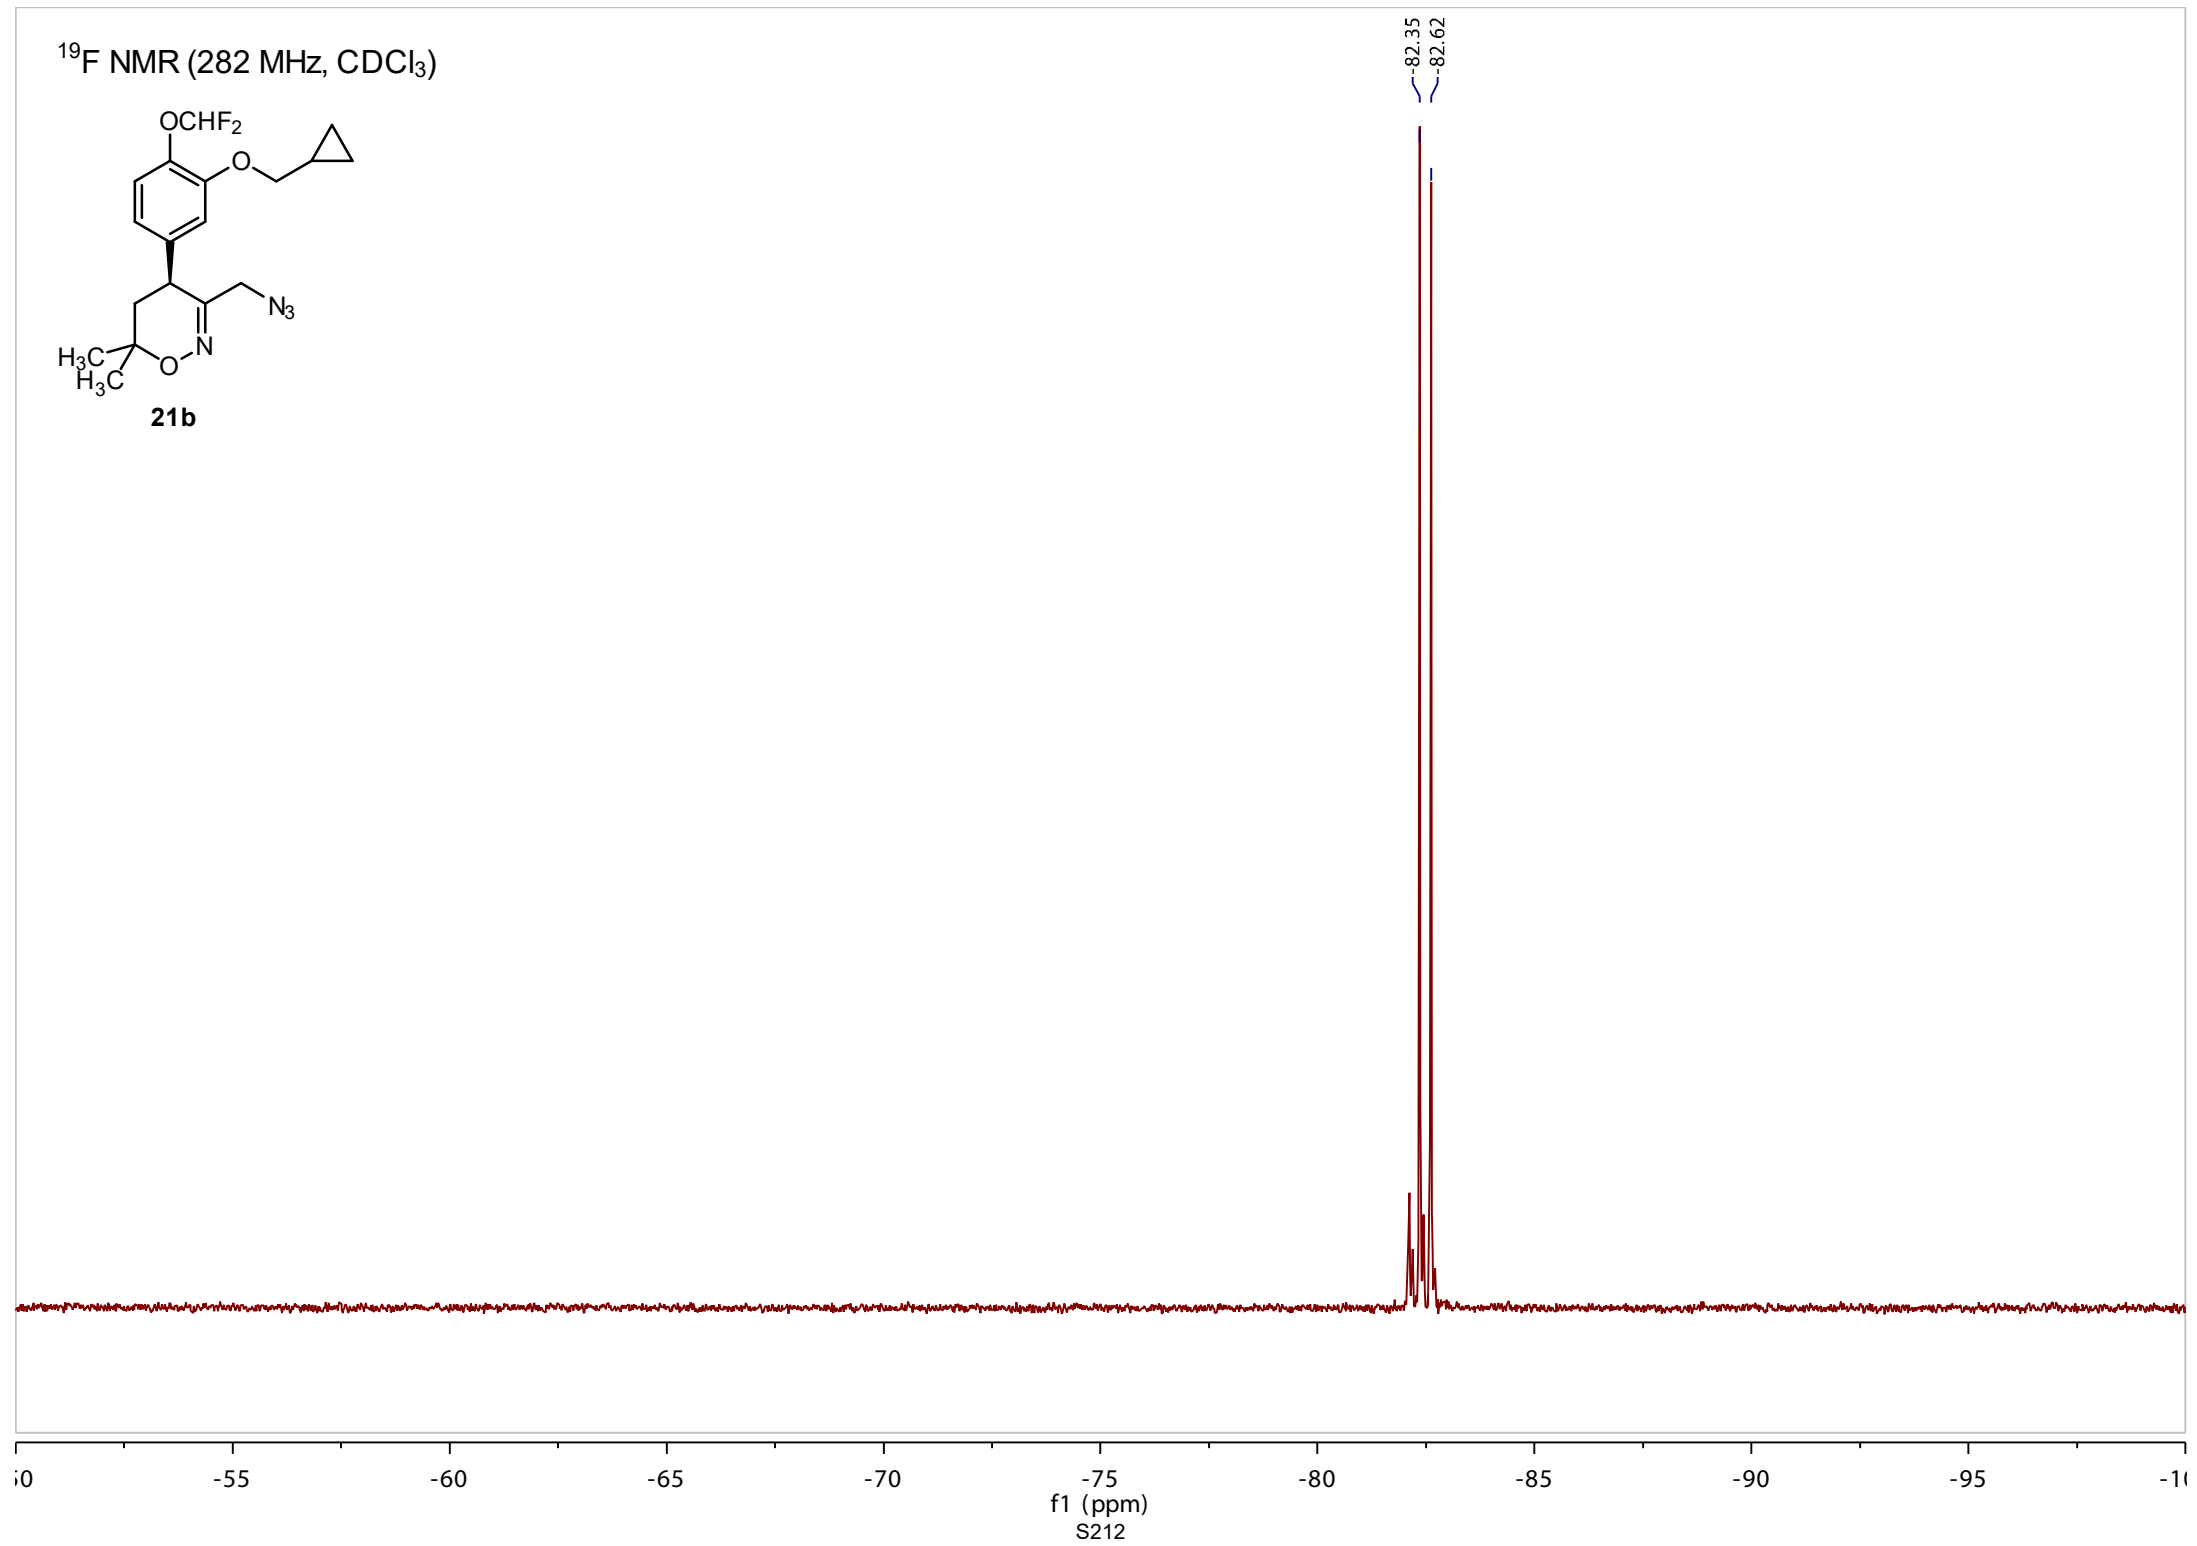

<sup>1</sup>H NMR (300 MHz, CDCl<sub>3</sub>)

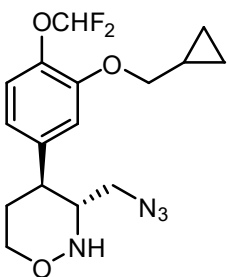

**22a**

+

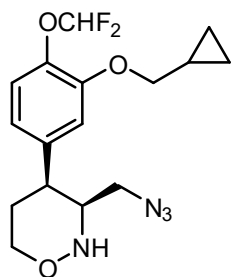

**22a'**

(minor 3,4-*cis* isomer)

d.r. 6.5 : 1

7.26  
7.13  
7.10  
6.86  
6.79  
6.76  
6.61  
6.36

4.15  
4.13  
4.11  
4.10  
3.88  
3.86  
3.83  
3.82  
3.31  
3.27  
3.26  
3.13  
3.10  
3.09  
3.06  
2.68  
2.67

1.96  
1.94  
1.86  
1.82

1.30  
1.27  
1.25

0.66  
0.64  
0.37  
0.35

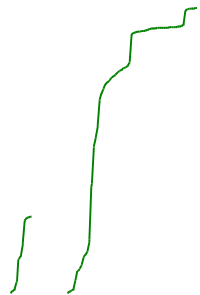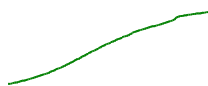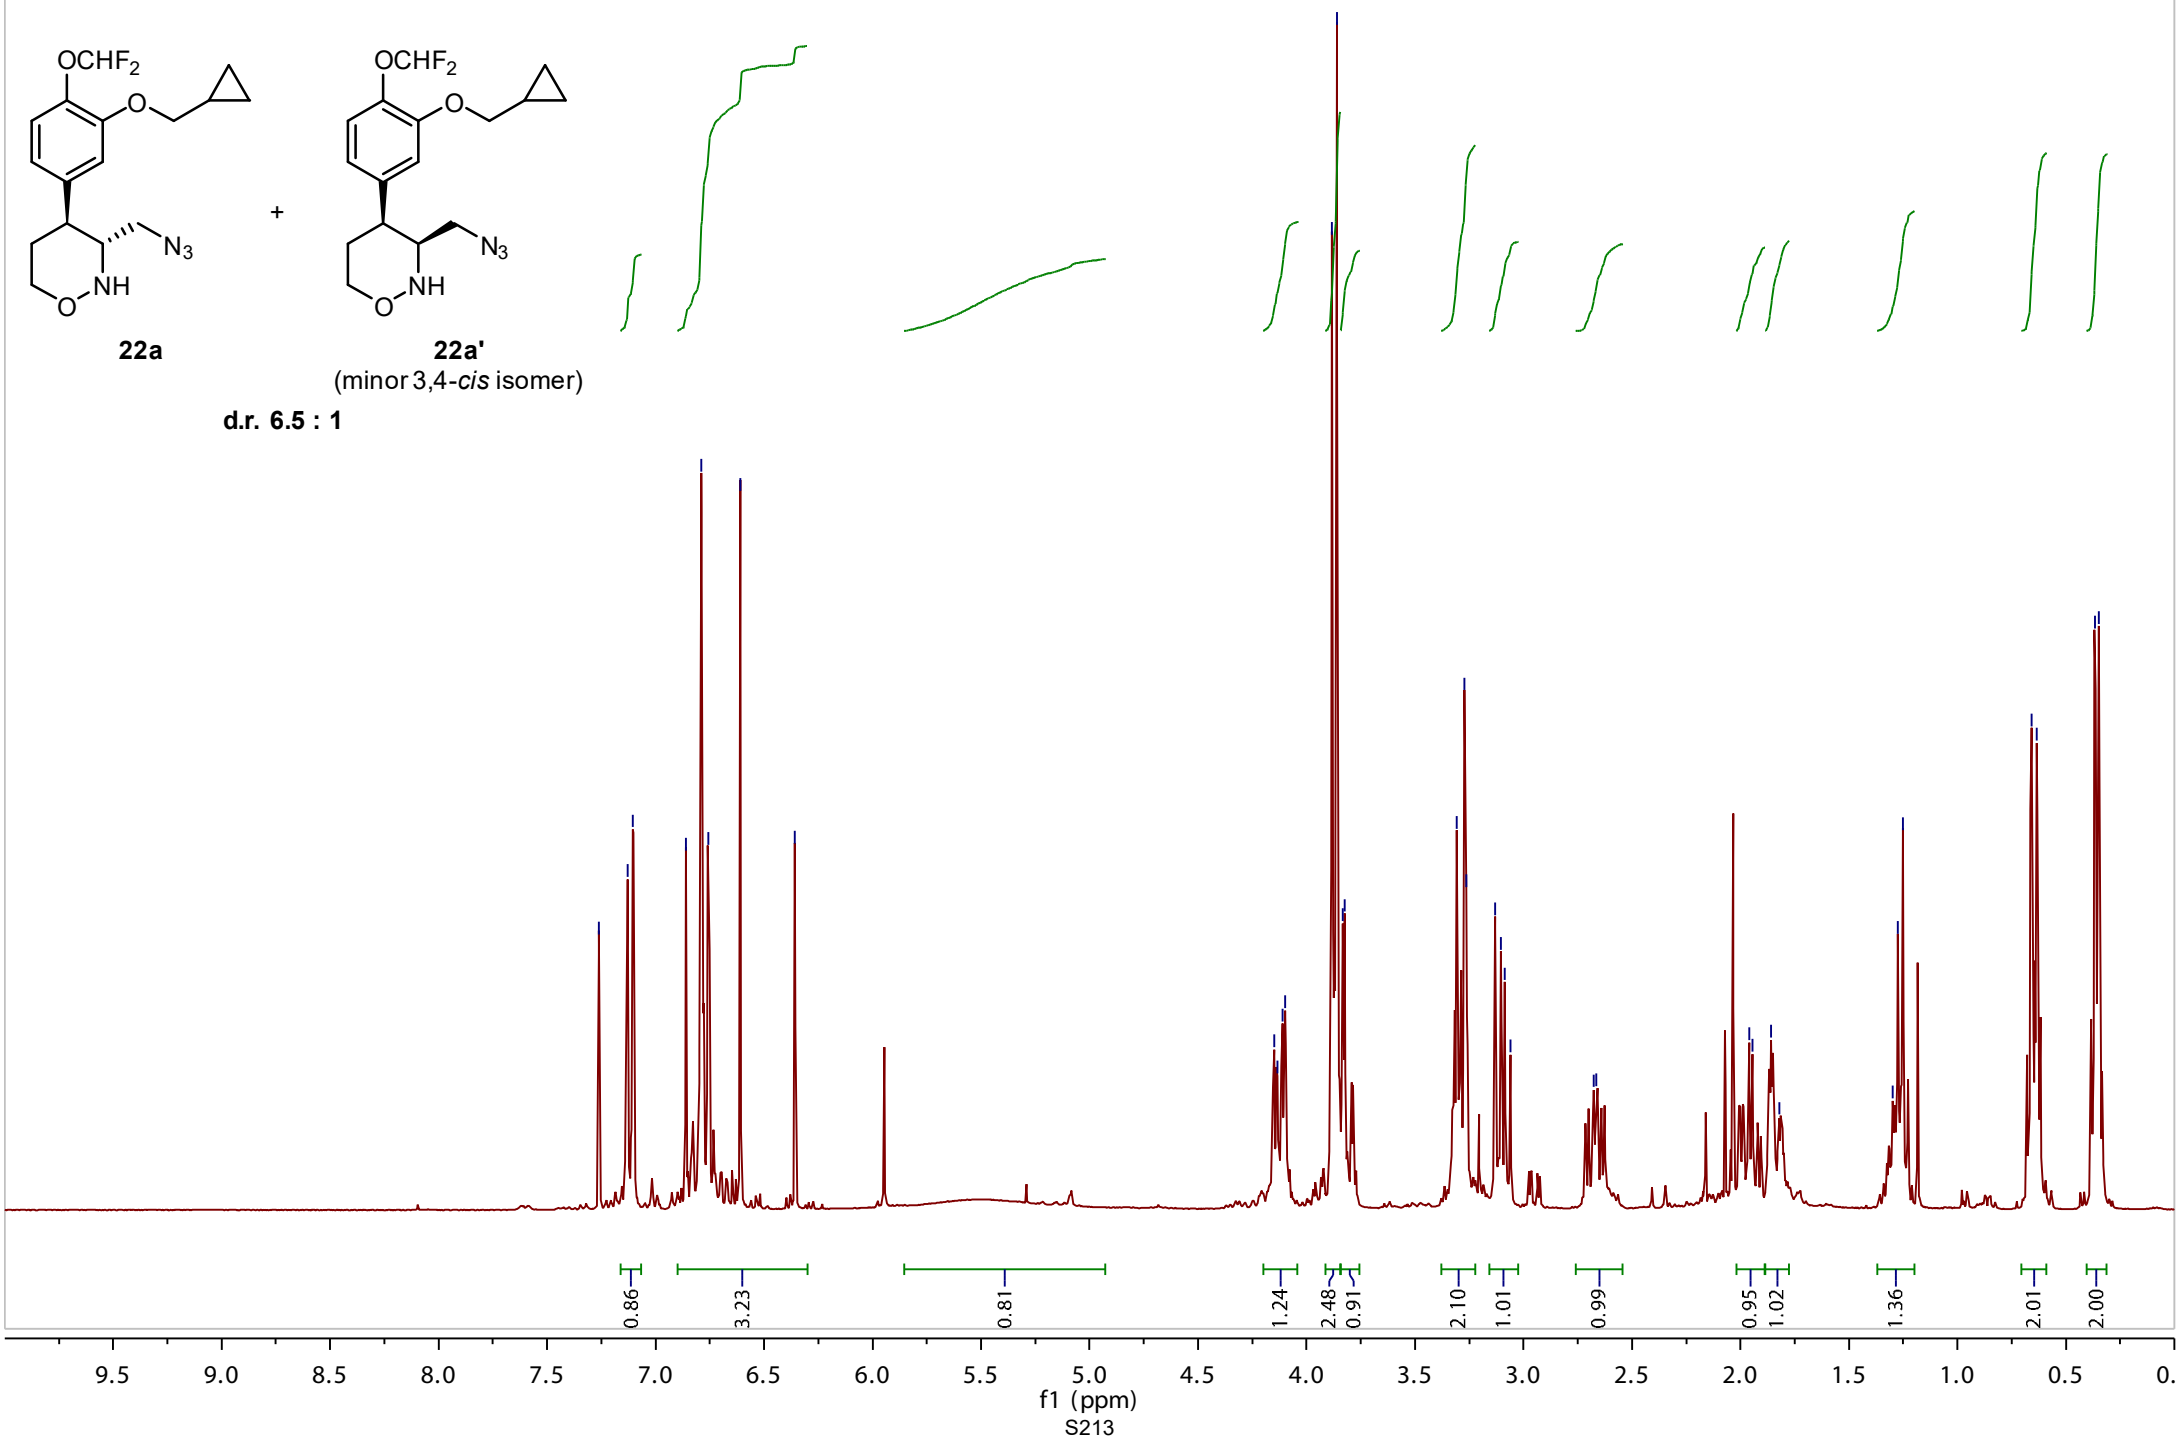

<sup>13</sup>C NMR (75 MHz, CDCl<sub>3</sub>)

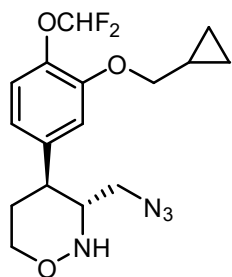

**22a**

+



**22a'**

(minor 3,4-*cis* isomer)

d.r. 6.5 : 1

150.95

140.22  
139.57

123.24

120.19

119.75

116.31

113.89

112.87

77.16

74.11

70.85

61.92

51.50

44.23

33.53

10.28

3.29

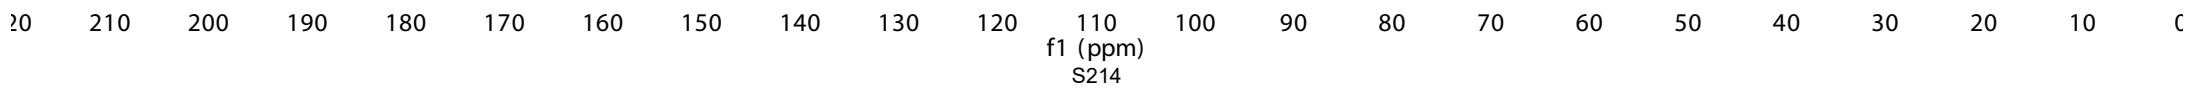

<sup>19</sup>F NMR (282 MHz, CDCl<sub>3</sub>)



**22a**

+



**22a'**

(minor 3,4-*cis* isomer)

d.r. 6.5 : 1

-81.46

-81.73

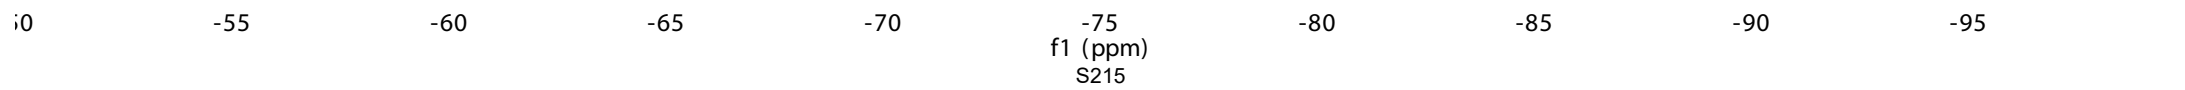

COSY NMR

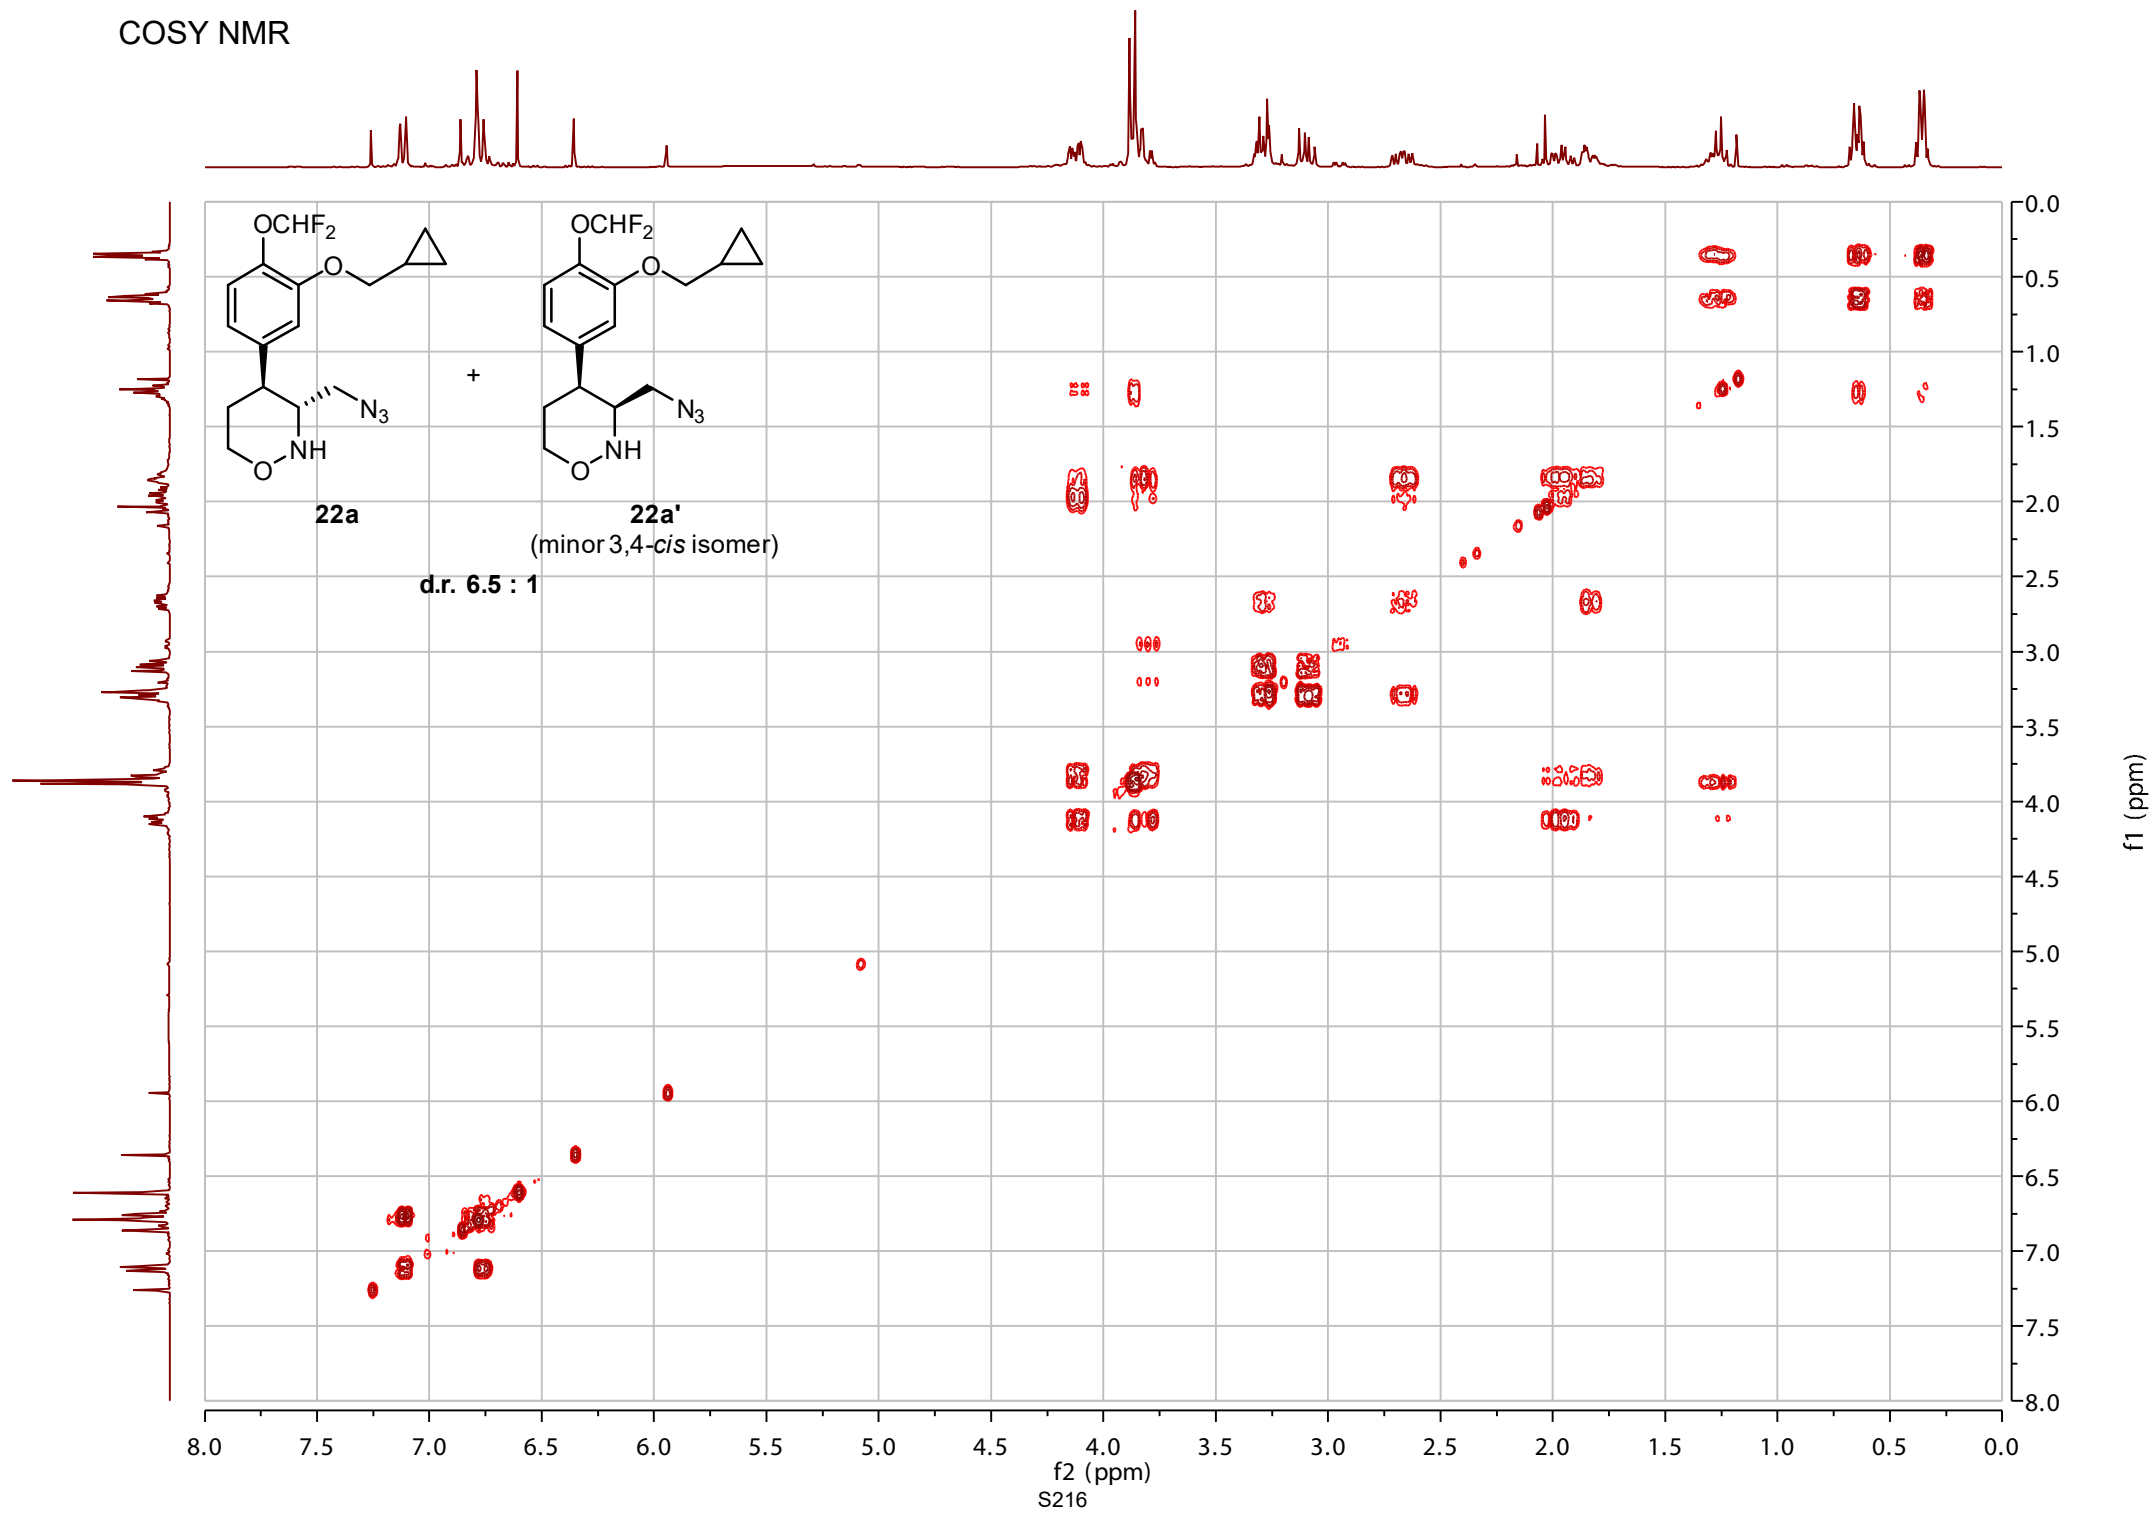



# HSQC NMR

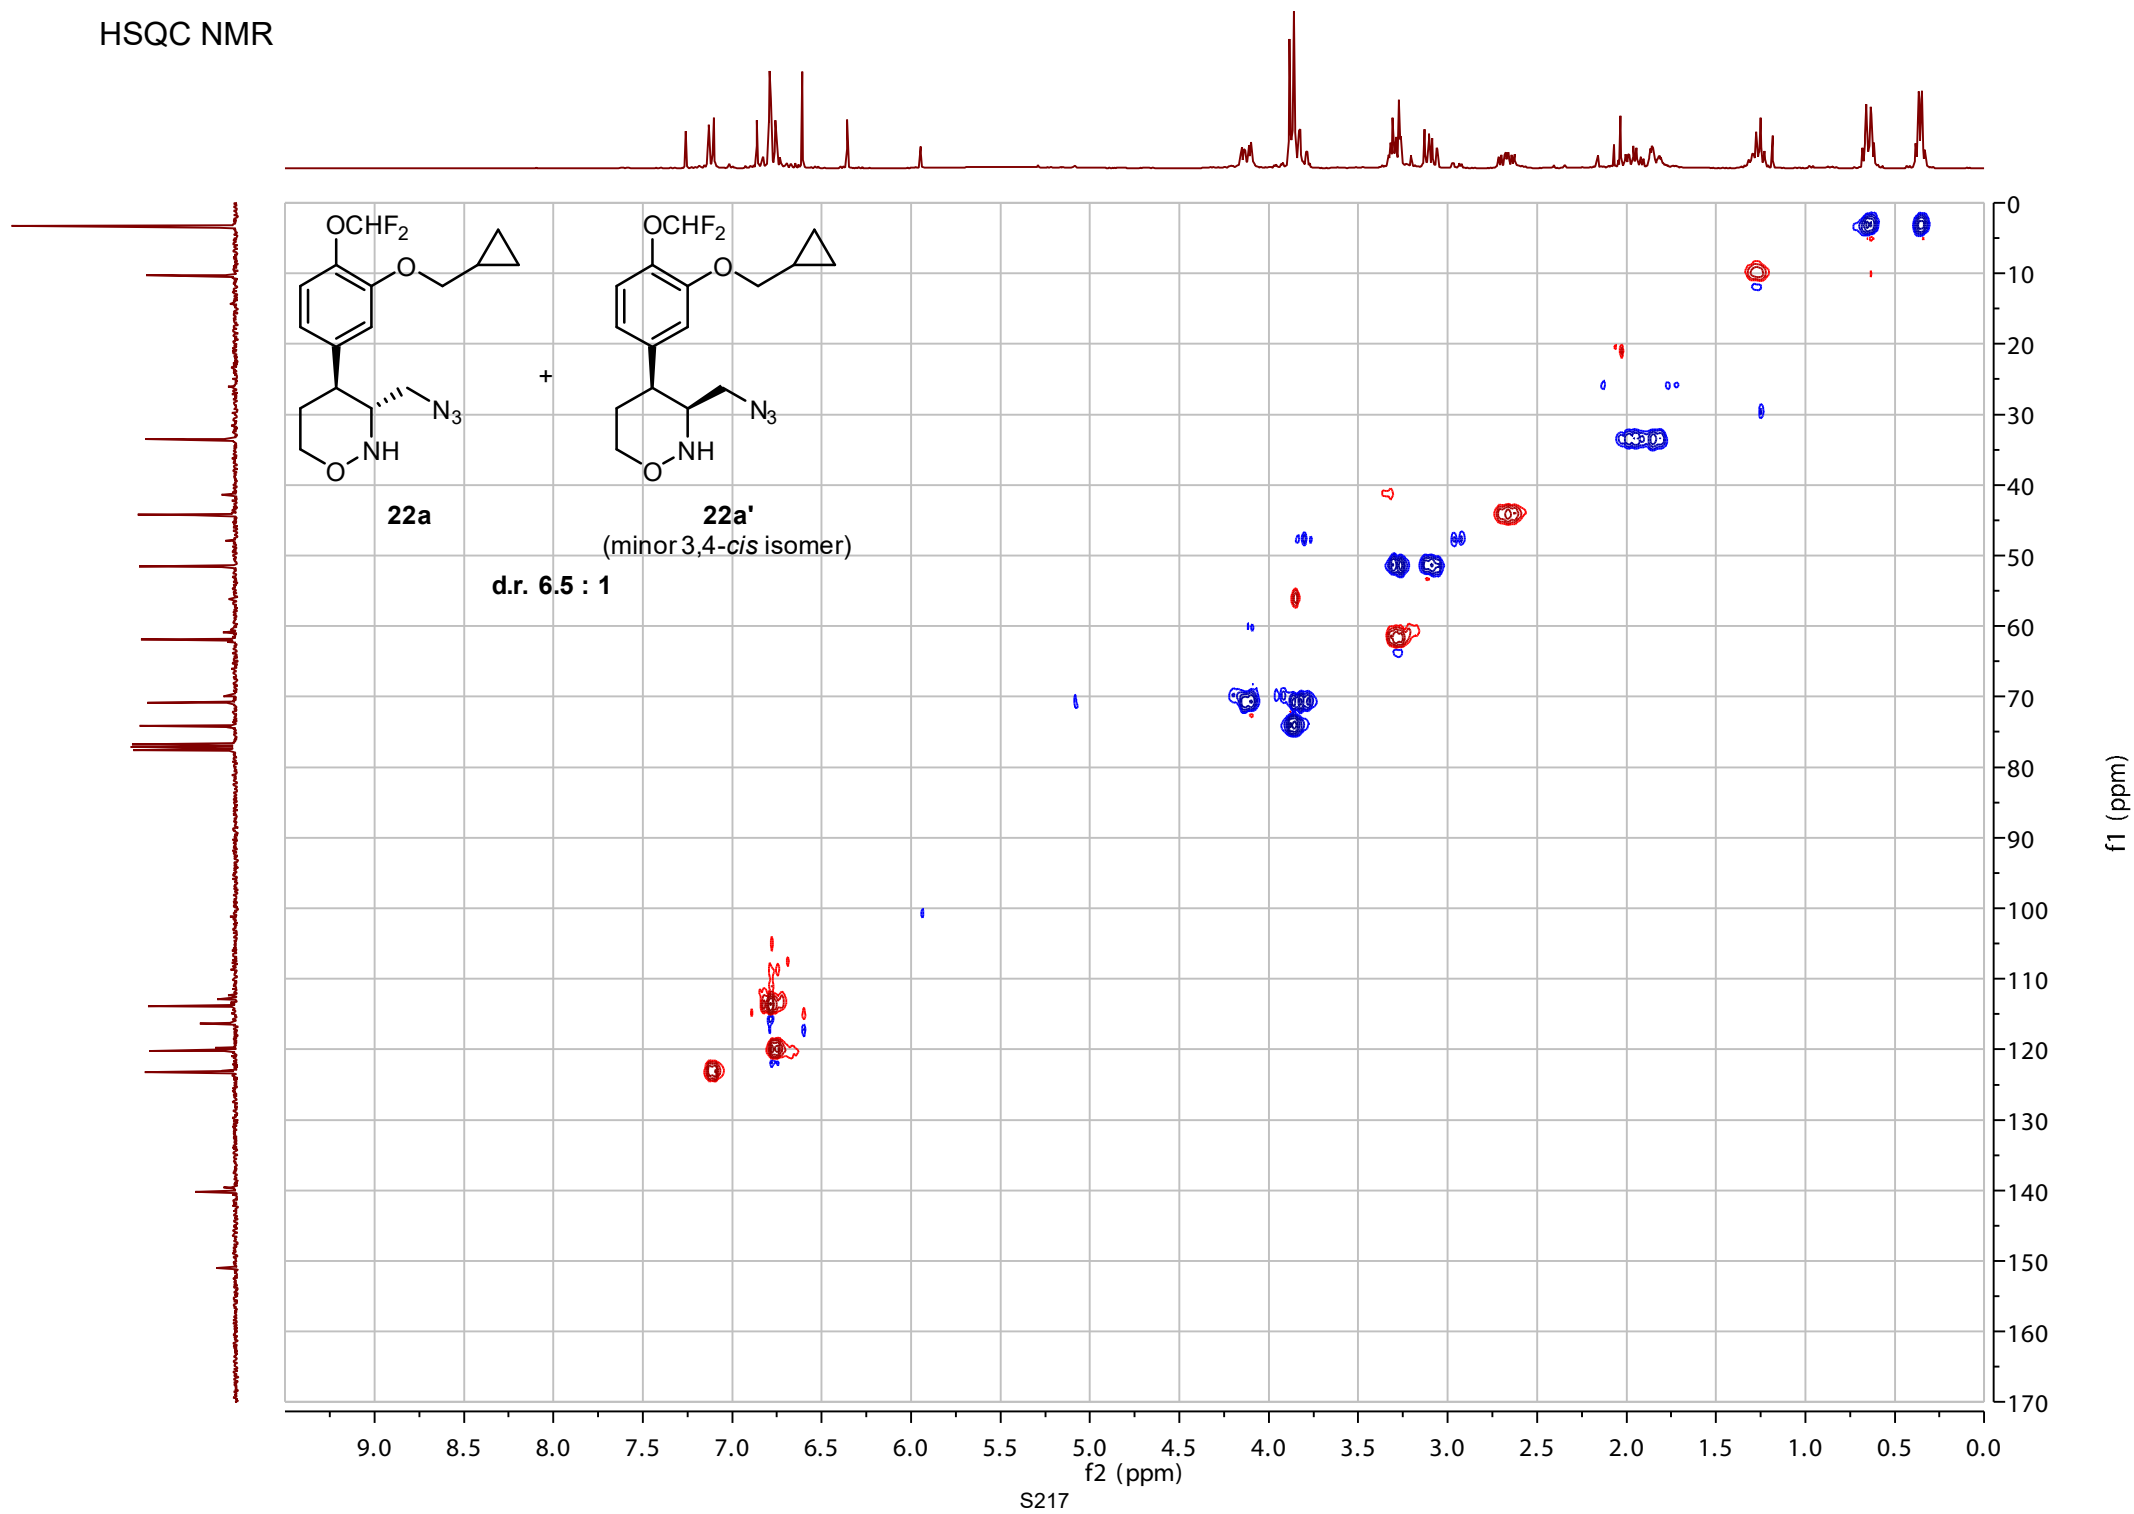

<sup>1</sup>H NMR (300 MHz, CDCl<sub>3</sub>)

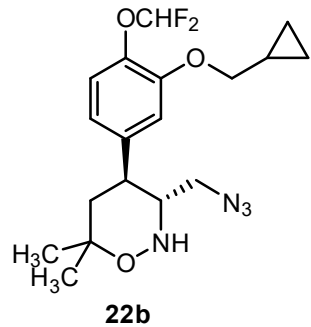

7.26  
7.12  
7.10  
6.86  
6.77  
6.75  
6.61  
6.36  
5.33  
3.88  
3.86  
3.33  
3.30  
3.20  
3.17  
3.14  
3.12  
3.11  
3.08  
2.88  
2.84  
2.82  
2.79  
1.75  
1.73  
1.72  
1.44  
1.40  
1.31  
1.28  
1.24  
0.68  
0.66  
0.64  
0.62  
0.39  
0.37  
0.35  
0.34

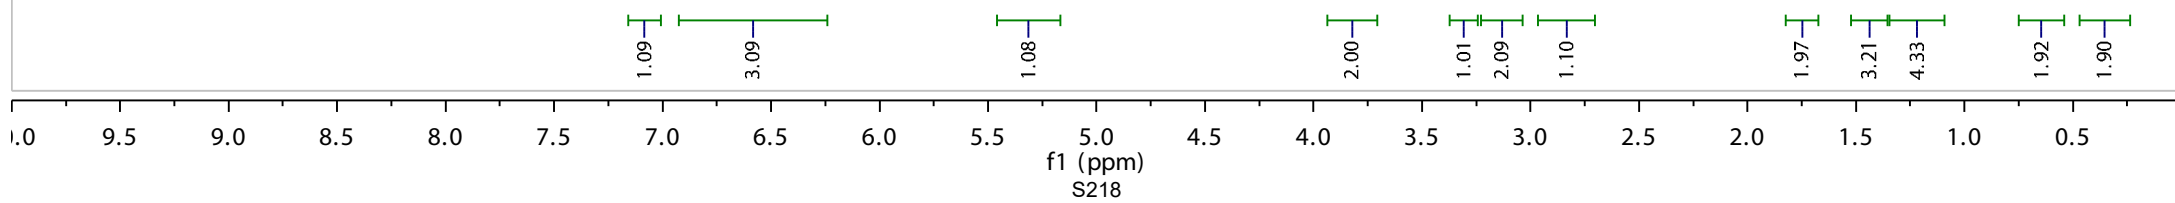

$^{13}\text{C}$  NMR (75 MHz,  $\text{CDCl}_3$ )

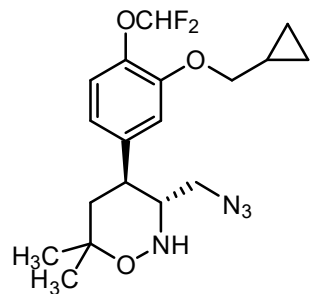

**22b**

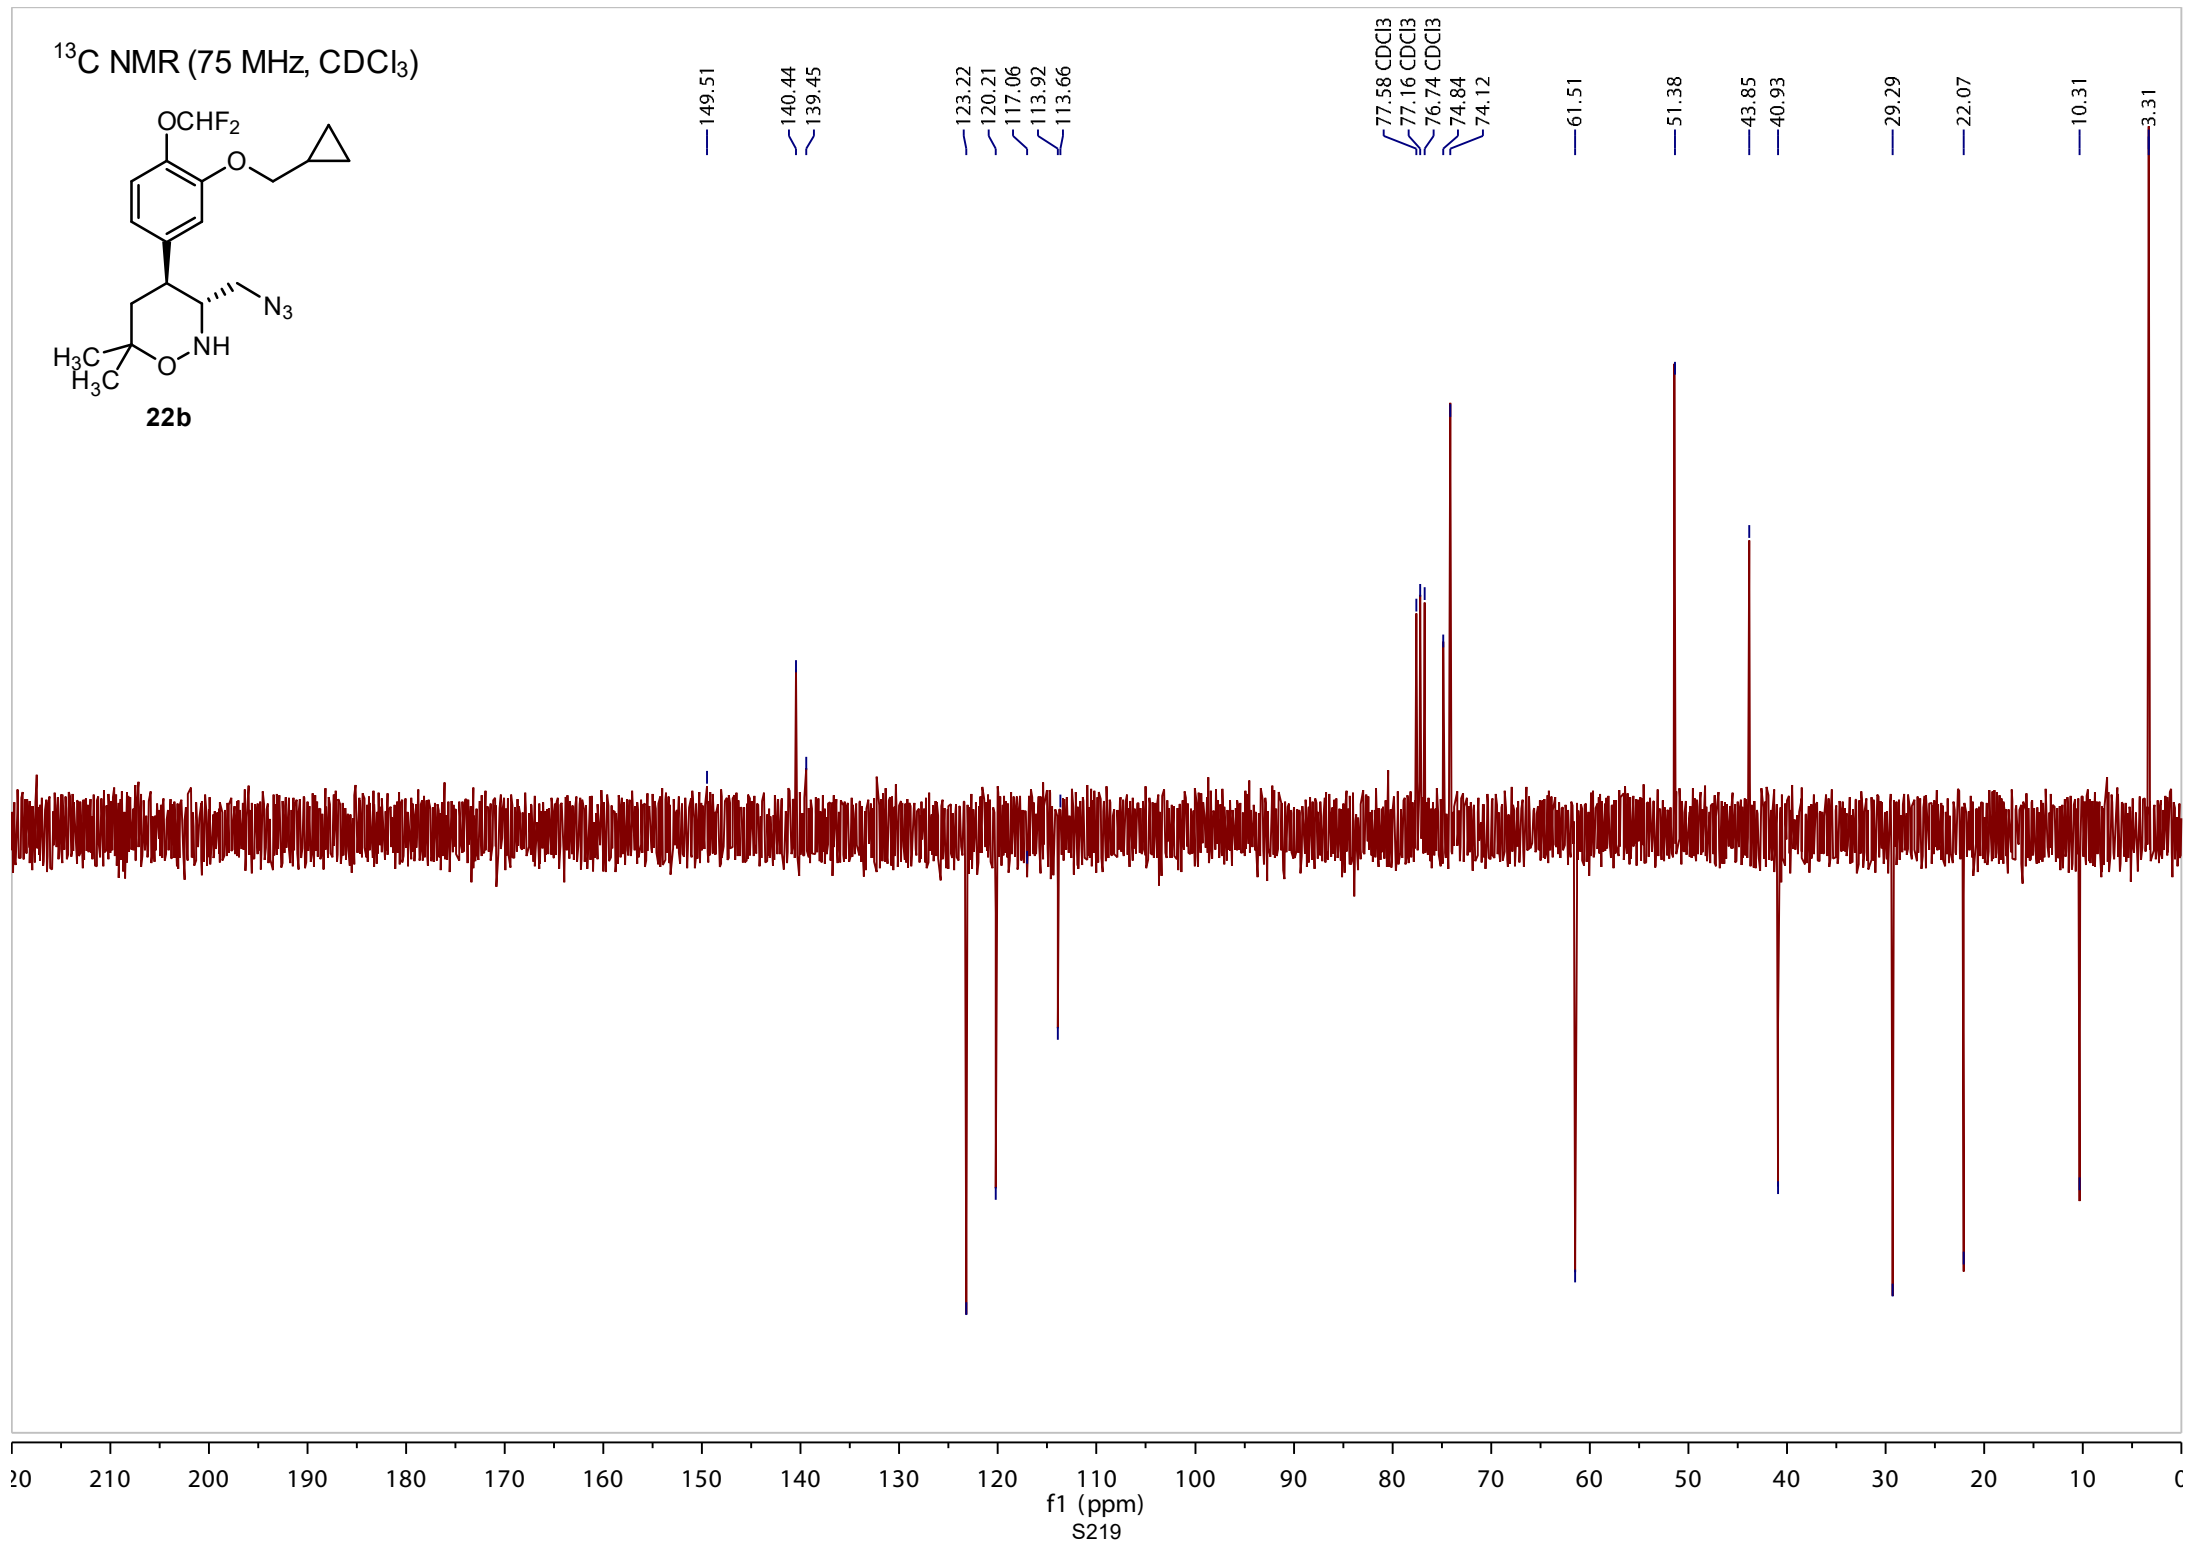

$^{19}\text{F}$  NMR (282 MHz,  $\text{CDCl}_3$ )

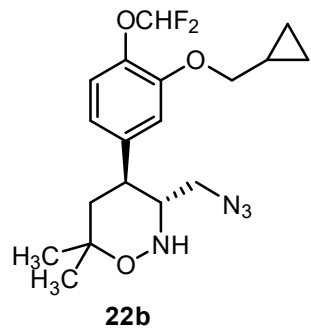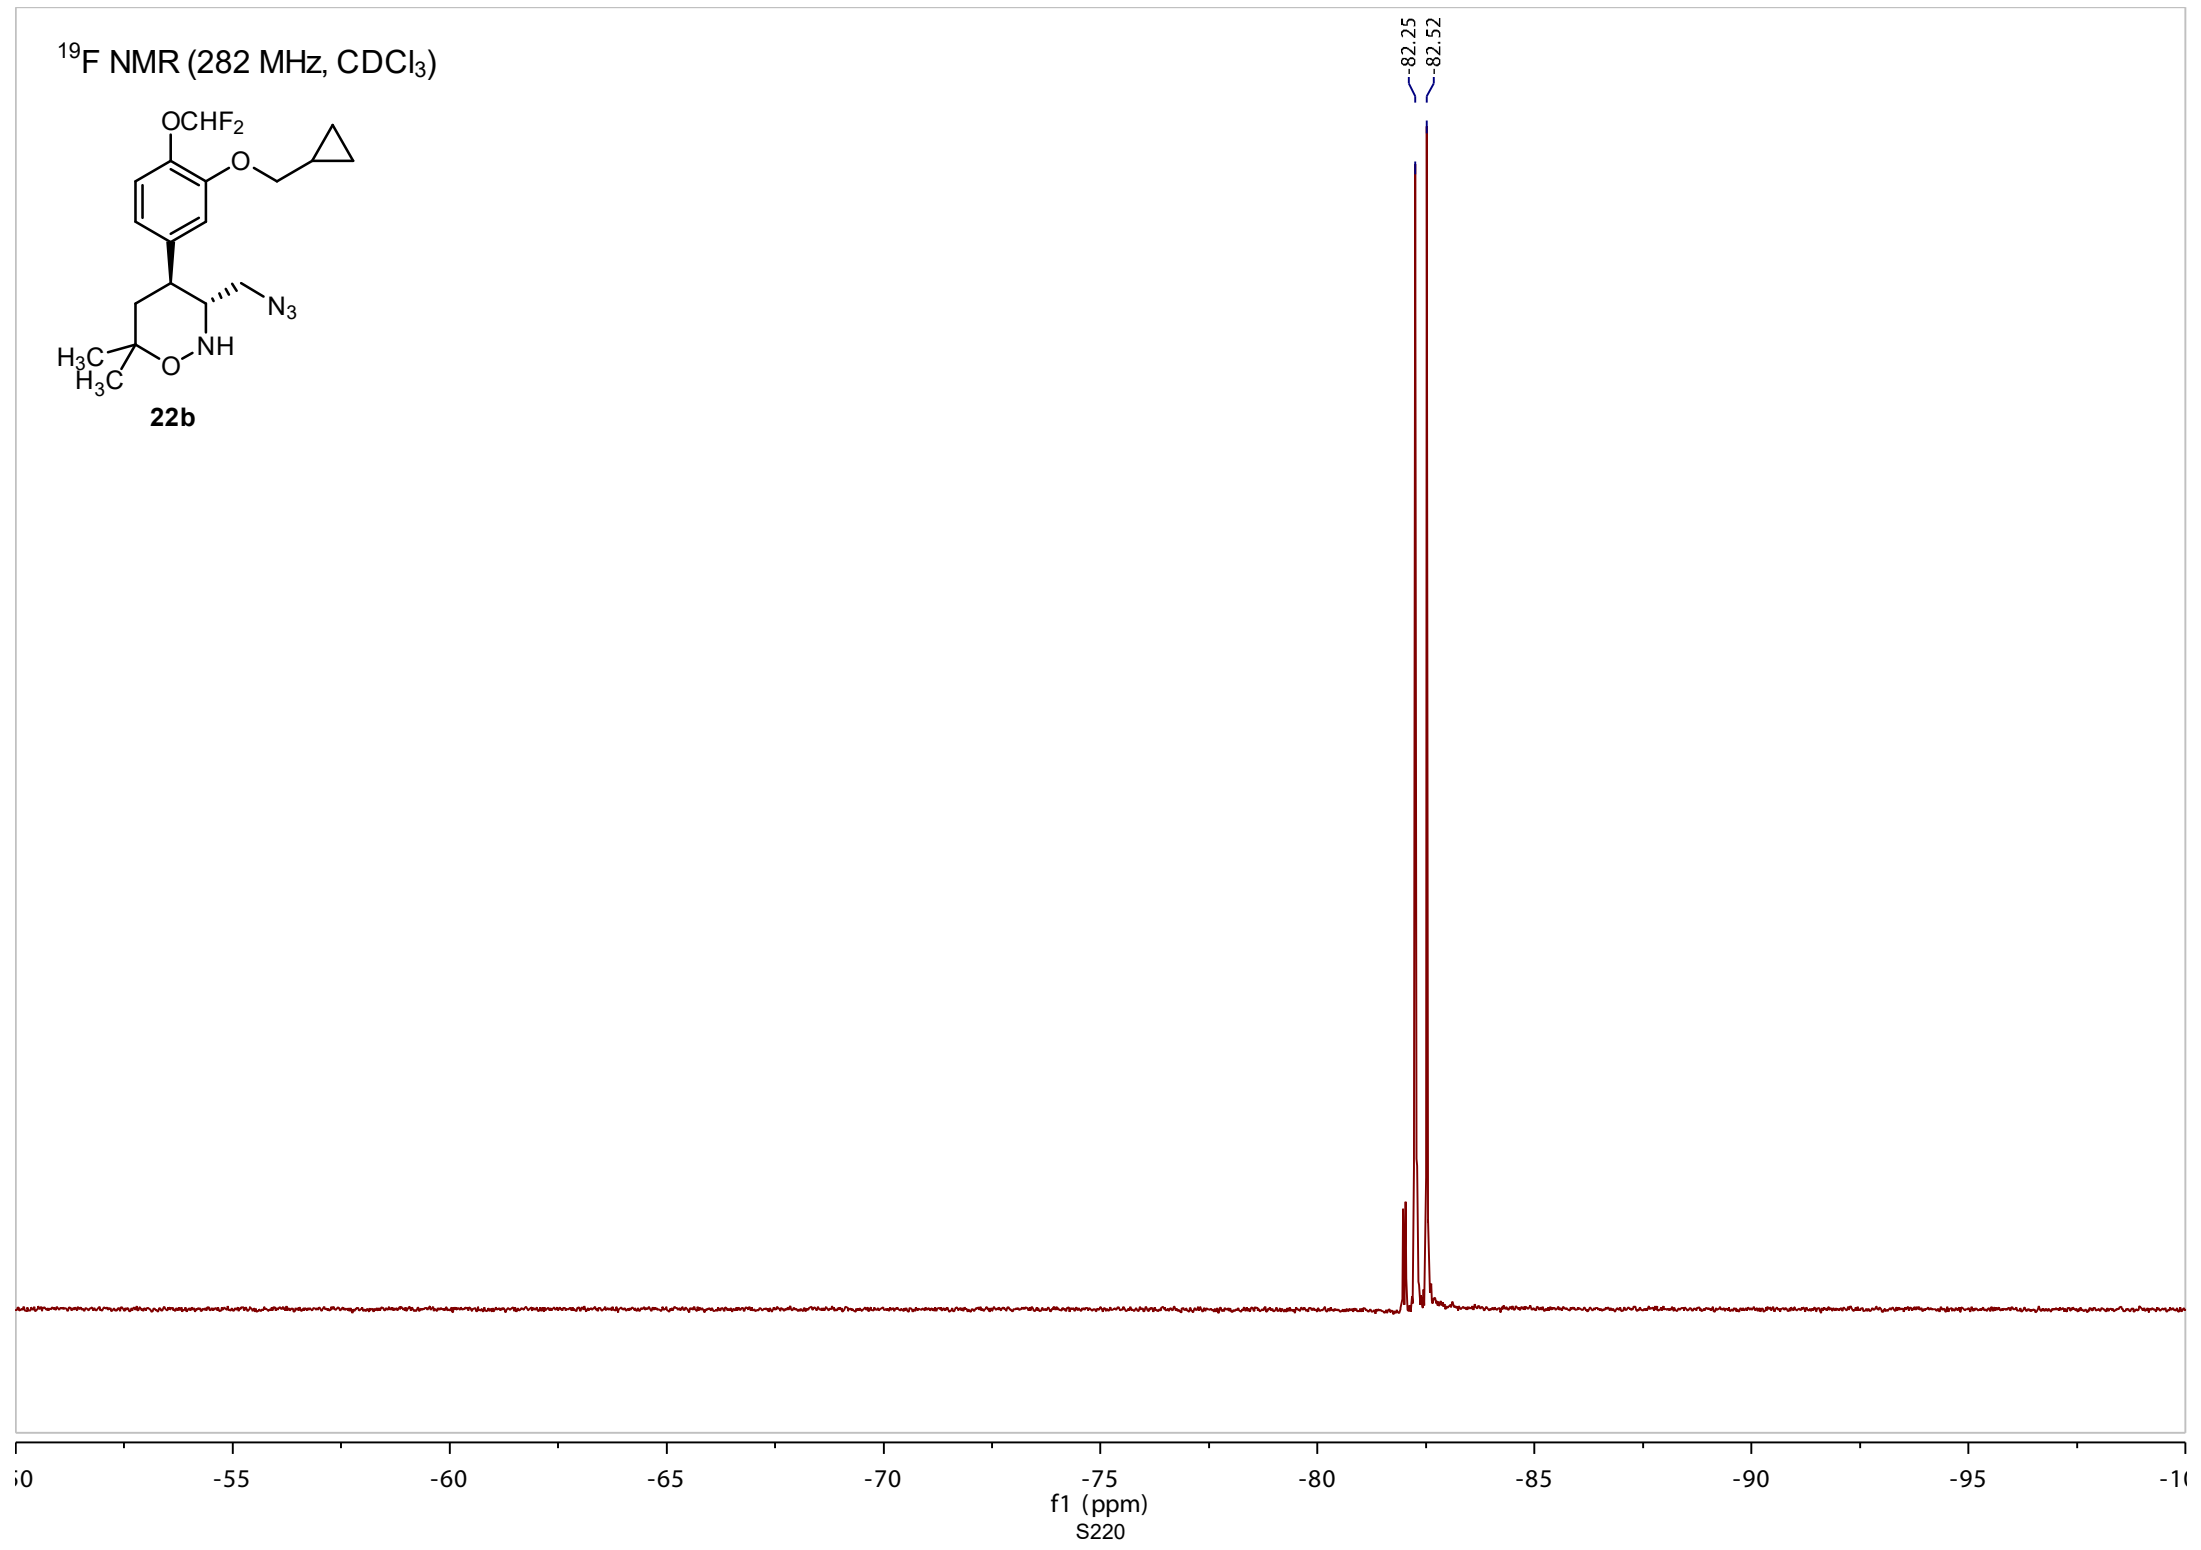

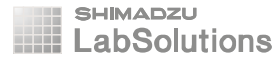

# Analysis Report

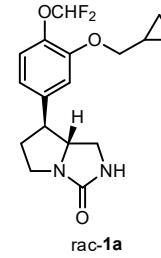

## <Sample Information>

Sample Name : VAD157\_rac  
 Sample ID : VAD157\_rac  
 Data Filename : VAD159.Tcd  
 Method Filename : multiwave.lcm  
 Batch Filename :  
 Vial # : 1-100  
 Injection Volume : 3 uL  
 Date Acquired : 20.02.2016 15:19:39  
 Date Processed : 29.10.2010 17:13:31

Sample Type : Unknown  
 Acquired by : PZ  
 Processed by : PZ

## <Chromatogram>

mAU

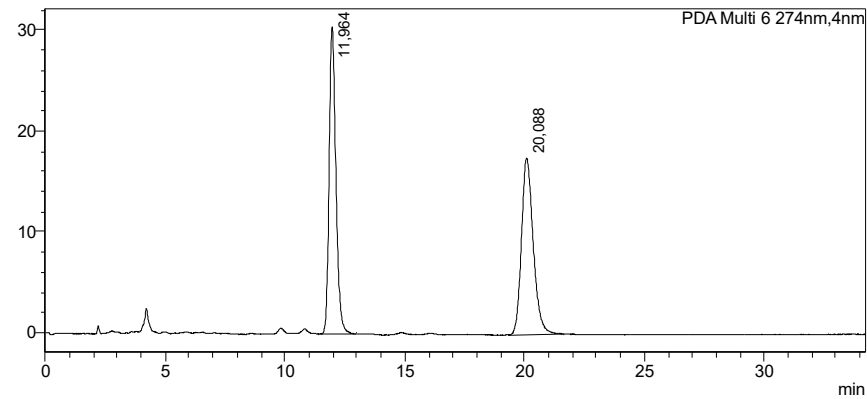

## <Peak Table>

PDA Ch6 274nm

| Peak# | Ret. Time | Area    | Height | Area%   |
|-------|-----------|---------|--------|---------|
| 1     | 11,964    | 596933  | 30452  | 49,928  |
| 2     | 20,088    | 598644  | 17514  | 50,072  |
| Total |           | 1195576 | 47966  | 100,000 |

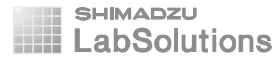

# Analysis Report

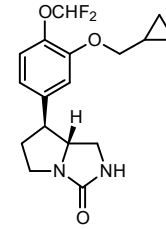

(-)-(7S,7aR)-1a

## <Sample Information>

Sample Name : VAD183\_chir  
 Sample ID : VAD183\_chir  
 Data Filename : VAD160.Tcd  
 Method Filename : multiwave.lcm  
 Batch Filename :  
 Vial # : 1-101  
 Injection Volume : 10 uL  
 Date Acquired : 20.02.2016 16:40:00  
 Date Processed : 29.10.2010 17:17:58

Sample Type : Unknown  
 Acquired by : PZ  
 Processed by : PZ

## <Chromatogram>

mAU

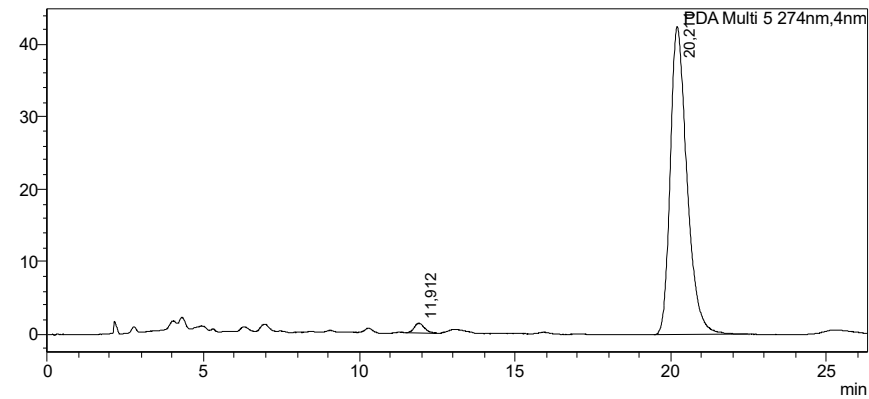

## <Peak Table>

PDA Ch5 274nm

| Peak# | Ret. Time | Area    | Height | Area%   |
|-------|-----------|---------|--------|---------|
| 1     | 11,912    | 29655   | 1321   | 1,839   |
| 2     | 20,211    | 1582470 | 42511  | 98,161  |
| Total |           | 1612125 | 43831  | 100,000 |

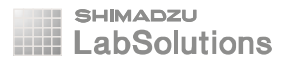

# Analysis Report

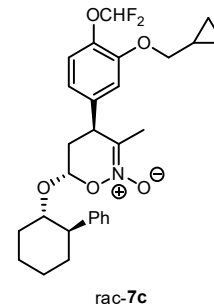

## <Sample Information>

Sample Name : VAD108\_5  
 Sample ID : VAD108\_5  
 Data Filename : VAD108\_5\_mod.lcd  
 Method Filename : 231014.lcm  
 Batch Filename :  
 Vial # : 1-16  
 Injection Volume : 10 uL  
 Date Acquired : 10.04.2015 16:52:40  
 Date Processed : 29.10.2010 17:01:16

Sample Type : Unknown  
 Acquired by : PZ  
 Processed by : PZ

## <Chromatogram>

mAU

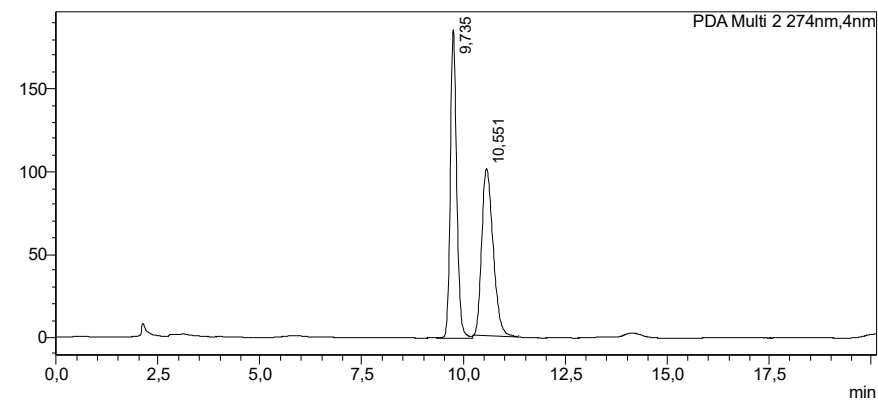

## <Peak Table>

| PDA Ch2 274nm |           |         |        |         |
|---------------|-----------|---------|--------|---------|
| Peak#         | Ret. Time | Area    | Height | Area%   |
| 1             | 9,735     | 2034034 | 186760 | 50,758  |
| 2             | 10,551    | 1973297 | 101385 | 49,242  |
| Total         |           | 4007332 | 288145 | 100,000 |



# Analysis Report

## <Sample Information>

Sample Name : VAD\_169\_1  
 Sample ID : VAD\_169\_1  
 Data Filename : VAD169\_1\_mod.lcd  
 Method Filename : 231014.lcm  
 Batch Filename :  
 Vial # : 1-20  
 Injection Volume : 5 uL  
 Date Acquired : 24.11.2015 19:12:54  
 Date Processed : 29.10.2010 17:37:56

Sample Type : Unknown  
 Acquired by : PZ  
 Processed by : PZ

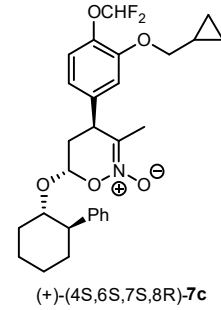

## <Chromatogram>

mAU

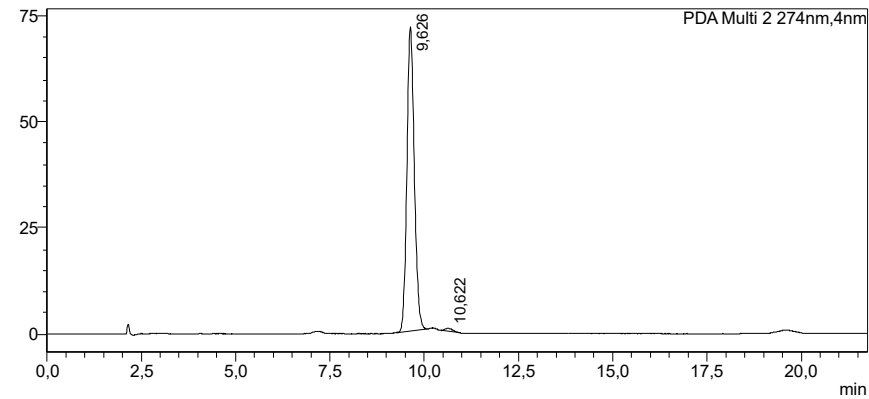

## <Peak Table>

PDA Ch2 274nm

| Peak# | Ret. Time | Area   | Height | Area%   |
|-------|-----------|--------|--------|---------|
| 1     | 9,626     | 983095 | 71810  | 99,008  |
| 2     | 10,622    | 9850   | 676    | 0,992   |
| Total |           | 992945 | 72486  | 100,000 |
